# Supplementary material for: PLZF targets developmental enhancers for activation during osteogenic differentiation of human mesenchymal stem cells
Source: eLife. 2019 Jan 23;8:e40364. doi: 10.7554/eLife.40364 (PMC6344081; doi:10.7554/eLife.40364)
Supplement: Figure 1—source data 1. [file elife-40364-fig1-data1.xlsx]

## Sheet: Sheet1
ChIP
	Promoter		region between EXON1 -EXON2		EXON3		Peak 3 in diff		Peak 6 in diff		EXON6
Primer name on fig	A		B		C		D		E		F
	Avg	SD	Avg	SD	Avg	SD	Avg	SD	Avg	SD	Avg	SD
Undiff K27me3	0.809716	0.0476766	0.367145	0.0719078	0.53404	0.041746	0.0798951	0.00494385	0.388035	0.0636745	0.205349	0.0326337
10ddiff K27me3	0.0215071	0.00691165	0.00375263	0.000244012	0.00328418	0.00103557	0.00173907	0.000199744	0.00104989	0.000247606	0.0211703	0.00104683
Undiff Suz12	0.0199808	0.00785191	0.00570615	0.00149922	0.00147369	0.000553144	0.00252025	0.000300007	0.00540603	0.00140359	0.0021457	0.000514291
10ddiff Suz12	0.00321378	0.000416467	0.00183735	6.89273e-05	0.00106185	9.37042e-05	0.00150256	9.14624e-05	0.00105914	0.000213012	0.00239489	0.000393477
Undiff K27Ac	1.35713	0.310217	1.91771	0.217528	0.581186	0.165812	2.34538	0.0402547	0.771058	0.221188	0.342365	0.126675
10ddiff K27Ac	15.2067	1.24372	11.8563	1.81343	16.5715	0.37863	4.2479	1.3442	2.39575	0.792097	5.15576	1.02989
Undiff K4me1	3.82433	0.521084	4.62486	0.865443	4.34972	1.39569	2.80673	0.397398	3.43422	0.316903	4.50072	0.220036
10ddiff K4me1	3.65031	0.117719	0.806091	0.177993	5.17032	0.821036	0.374793	0.0532291	0.385132	0.0427443	7.04783	1.48616
Undiff IgG	0.00281953	0.000501522	0.00728732	0.00119105	0.0055662	0.00174646	0.00462249	0.00135599	0.00827646	0.00300554	0.00517861	0.00218956
10ddiff IgG	0.00208819	0.000753157	0.00309455	0.000399744	0.00173743	0.000523024	0.00309719	0.000566815	0.00258557	0.00107788	0.0175287	0.00330001
Undiff IgG	0.00164166	0.000189052	0.000569153	3.53225e-05	0.00892136	0.000781919	0.00427897	0.00342286	0.00645237	0.00584222	0.00651565	0.00179762
10ddiff IgG	0.00465763	0.000374866	0.000370678	0.000150698	0.00653693	0.000871066	0.000136082	7.68604e-05	4.49652e-05	6.85203e-05	0.00206879	0.000313346
Undiff K4tri
10ddiff K4tri
Undiff K4 tri	0.207519	0.0566536	0.860686	0.0177932			0.606388	0.0167931	0.186068	0.0163727
Diff K4 tri	0.833552	0.265123	2.06913	0.14214			0.640785	0.0364445	0.577214	0.100554
