# Supplementary material for: PLZF targets developmental enhancers for activation during osteogenic differentiation of human mesenchymal stem cells
Source: eLife. 2019 Jan 23;8:e40364. doi: 10.7554/eLife.40364 (PMC6344081; doi:10.7554/eLife.40364)
Supplement: Figure 2—figure supplement 1—source data 1. [file elife-40364-fig2-figsupp1-data1.xlsx]

## Sheet: Sheet1
			ChIP 190612, qPCR 291113
Sample Name	Target	Avg norm	SD for norm			T test
Ctrl Ud PLZF	ENP	1	0	1	1	0.0448575
				3.26063	4.53023
				1	1	0.0113475
Ctrl 2ddiff PLZF	ENP	3.26063	0.828503	0.503883	0.384443
PLZF kd Ud PLZF	ENP	1	0
PLZF kd 2ddiff PLZF	ENP	0.503883	0.332515
			ChIP 050712, qPCR 291113
Sample Name	Target	Avg norm	SD for norm
Ctrl Ud PLZF	ENP	1	0
Ctrl 2ddiff PLZF	ENP	4.53023	0.5072
PLZF kd Ud PLZF	ENP	1	0
PLZF kd 2ddiff PLZF	ENP	0.384443	0.215834
