# Supplementary material for: PLZF targets developmental enhancers for activation during osteogenic differentiation of human mesenchymal stem cells
Source: eLife. 2019 Jan 23;8:e40364. doi: 10.7554/eLife.40364 (PMC6344081; doi:10.7554/eLife.40364)
Supplement: Figure 3—source data 1. [file elife-40364-fig3-data1.xlsx]

## Sheet: PLsi2d PLsi2dvsCtsi2d
TranscriptId	Accn	LocusId	Symbol	GeneId	ContigAccn	Chromosome	Strand	Start	End	Transcript length	#exons	p-value	adj. p-value	log2(fold change)	Regulation	#reads treat1	#reads treat2	#reads treat3	#reads ctrl1	#reads ctrl2	#reads ctrl3	NE treat1	NE treat2	NE treat3	NE ctrl1	NE ctrl2	NE ctrl3	mean NE(treat)	stddev NE(treat)	mean NE(ctrl)	stddev NE(ctrl)		Mean NE between transcripts					Normalisation to ct si 2 d
																						PLZFsi 2d A	PLZFsi 2d B	PLZFsi 2d C	CrlSi 2d A	CrlSi 2d B	CrlSi 2d C	PLZFsi2d	PLZFsi2d	Ctrlsi 2d	Ctrlsi 2d		PLZFsi2d	SD PLSi	Ctrlsi2d	SD ctrl si		Ctrlsi2d	PLZFsi2d	Ctrlsi2d	PLZFsi2d	SD ctrl si	SD PLSi
		PLZFkd 2d/Control2d																																												Ctrlsi2d	PLZFsi2d	SD ctrl si	SD PLSi
																																													SAMHD1	1	0.24396	0	0.00649286
GXT_22737047	ENST00000262878	GXL_122630	SAMHD1	25939	NC_000020	chr20	-	35518632	35580246	4784	16	0	0	-2.06	down	786	561	1238	3490	1526	3214	0.08104	0.07511	0.08841	0.34297	0.37067	0.31958	0.08152	0.00544	0.34441	0.02088		0.0810533	0.00127571	0.332407	0.0107592	SAMHD1	1	0.236695	1	0.24396	0	0.00649286		LEP	1	0.151794	0	0.00481829
GXT_23211489	AK304187	GXL_122630	SAMHD1	25939	NC_000020	chr20	-	35521054	35580075	2121	16	0	0	-1.99	down	396	255	570	1600	680	1433	0.08681	0.07279	0.08649	0.33363	0.34932	0.30459	0.08203	0.00653	0.32918	0.01853							1	0.249195						AHCY	1	0.653318	0	0.0179347
GXT_2782290	AK027811	GXL_122630	SAMHD1	25939	NC_000020	chr20	-	35521097	35580219	2292	16	0	0	-2	down	410	264	615	1692	719	1533	0.08308	0.06942	0.08634	0.32702	0.34201	0.30186	0.07961	0.00733	0.32363	0.01657							1	0.245991						APOB	1	0.476225	0	0.00466333
																																													OMD	1	0.693533	0	0.0111872
GXT_22792518	AK313553	GXL_78423	LEP	3952	NC_000007	chr7	+	127881333	127894816	559	3	2.23e-213	9.18e-210	-2.65	down	56	52	83	434	165	366	0.04974	0.0579	0.05365	0.3714	0.35146	0.3163	0.05376	0.00333	0.34639	0.02278		0.05038	0.00478004	0.331565	0.0209657	LEP	1	0.155201	1	0.151794	0	0.00481829		COL11A1	1	0.624128	0	0.0365138
GXT_2809221	NM_000230	GXL_78423	LEP	3952	NC_000007	chr7	+	127881331	127897682	3427	3	3.17e-246	1.92e-242	-2.74	down	333	226	444	2303	909	2045	0.05052	0.04368	0.04681	0.33076	0.32385	0.29561	0.047	0.0028	0.31674	0.01521							1	0.148387						COL7A1	1	0.552428	0	0.0263874
																																													FZD8	1	0.422532	0.00177	0.00263
																																													FZD5	1	0.337864	0	0.0180143
GXT_22783968	AK309204	GXL_122721	AHCY	191	NC_000020	chr20	-	32881272	32891163	1170	3	4.04e-10	8.38e-09	-0.65	down	169	119	254	262	113	289	0.06874	0.06206	0.07247	0.10103	0.11042	0.11216	0.06776	0.00431	0.10787	0.00489		0.196502	0.00178507	0.299049	0.00209474	AHCY	1	0.628164	1	0.653318	0	0.0179347		WNT5A	1	0.610778	0	0.0388904
GXT_22784060	AK290422	GXL_122721	AHCY	191	NC_000020	chr20	-	32868549	32891161	1675	10	1.73e-18	6.72e-17	-0.6	down	899	661	1247	1354	586	1402	0.2604	0.24978	0.25196	0.37215	0.39902	0.38711	0.25405	0.00458	0.38609	0.01099							1	0.658007						WNT8B	1	0.737522	0	0.0115263
GXT_23211470	AK300014	GXL_122721	AHCY	191	NC_000020	chr20	-	32868656	32891159	1506	10	1.56e-19	6.43e-18	-0.58	down	798	602	1125	1206	517	1254	0.25584	0.25274	0.25265	0.36782	0.38837	0.38425	0.25374	0.00148	0.38015	0.00888							1	0.667473						CALD1	1	0.666773	0	0.0599412
GXT_23388598	AK316180	GXL_122721	AHCY	191	NC_000020	chr20	-	32868686	32891159	1448	10	5.95e-20	2.51e-18	-0.58	down	752	571	1078	1152	490	1192	0.24942	0.24843	0.25104	0.36406	0.38103	0.37831	0.24963	0.00108	0.37447	0.00744							1	0.666622
GXT_23535494	NM_001161766	GXL_122721	AHCY	191	NC_000020	chr20	-	32868071	32899608	2371	10	2.62e-27	1.64e-25	-0.59	down	1044	835	1486	1634	685	1712	0.21648	0.22636	0.21462	0.32184	0.33357	0.33908	0.21915	0.00515	0.3315	0.00719							1	0.661086
GXT_24424014	ENST00000512005	GXL_122721	AHCY	191	NC_000020	chr20	-	32822646	32868979	478	3	2.46e-05	0.000257	-0.68	down	62	51	101	96	48	123	0.065	0.06874	0.07473	0.09739	0.11838	0.12553	0.06949	0.00401	0.11377	0.01194							1	0.610794
GXT_24441799	ENST00000217426	GXL_122721	AHCY	191	NC_000020	chr20	-	32868074	32891154	2143	10	4.01e-27	2.48e-25	-0.6	down	1073	846	1540	1681	710	1766	0.24613	0.25344	0.24626	0.36654	0.3827	0.38718	0.24861	0.00342	0.37881	0.00886							1	0.656292
GXT_24441800	ENST00000480653	GXL_122721	AHCY	191	NC_000020	chr20	-	32868076	32891123	2211	9	5.87e-27	3.59e-25	-0.59	down	1070	853	1557	1691	707	1778	0.23784	0.24778	0.24147	0.35751	0.36927	0.37797	0.24236	0.00411	0.36825	0.00838							1	0.65814
GXT_24441801	ENST00000468908	GXL_122721	AHCY	191	NC_000020	chr20	-	32879271	32889754	675	5	5.69e-14	1.65e-12	-0.66	down	229	172	326	384	147	385	0.15229	0.15186	0.15189	0.24749	0.23678	0.2435	0.15201	0.0002	0.24259	0.00442							1	0.626613
GXT_24441802	ENST00000473516	GXL_122721	AHCY	191	NC_000020	chr20	-	32883235	32890481	488	2	4.96e-05	0.000479	-0.57	down	72	68	116	124	49	133	0.0752	0.09122	0.08424	0.12241	0.1187	0.13268	0.08355	0.00656	0.1246	0.00591							1	0.670546
GXT_24508968	AK075629	GXL_122721	AHCY	191	NC_000020	chr20	-	32867497	32880285	2313	7	3.86e-18	1.47e-16	-0.59	down	882	702	1270	1382	583	1444	0.19057	0.1983	0.19062	0.2831	0.29369	0.29808	0.19316	0.00363	0.29162	0.00629							1	0.662369
GXT_24511062	ENSOCUT00000008592	GXL_122721	AHCY	191	NC_000020	chr20	-	32868143	32883423	1983	9	1.03e-27	6.58e-26	-0.59	down	1020	811	1449	1598	663	1671	0.25386	0.26385	0.25094	0.37751	0.38634	0.39685	0.25622	0.00553	0.3869	0.00791							1	0.662238
GXT_2771700	AK097610	GXL_122721	AHCY	191	NC_000020	chr20	-	32868076	32899608	2366	10	2.61e-27	1.63e-25	-0.59	down	1044	835	1486	1634	684	1712	0.21693	0.22684	0.21507	0.32252	0.33375	0.3398	0.21961	0.00517	0.33202	0.00716							1	0.661436
GXT_2837408	NM_000687	GXL_122721	AHCY	191	NC_000020	chr20	-	32868071	32891215	2207	10	4.69e-27	2.89e-25	-0.6	down	1074	847	1542	1683	710	1767	0.23923	0.2464	0.23944	0.35636	0.3716	0.37618	0.24169	0.00333	0.36805	0.00847							1	0.656677
GXT_22784708	AK290844	GXL_75690	APOB	338	NC_000002	chr2	-	21239311	21266945	3460	21	0.135	0.332	-0.34	down	26	18	36	31	12	39	0.00364	0.00351	0.00365	0.00434	0.0039	0.0051	0.0036	6e-05	0.00445	0.0005		0.0044	0.000226182	0.007815	0.000126853	APOB			1	0.476225	0	0.00466333
GXT_22814177	ENSECAT00000009311	GXL_75690	APOB	338	NC_000002	chr2	-	21224659	21266427	13509	28	1.36e-26	8.21e-25	-1.06	down	149	118	199	314	131	333	0.00571	0.00589	0.00526	0.01144	0.01168	0.01205	0.00562	0.00026	0.01172	0.00025							1	0.479522
GXT_23205255	ENST00000399256	GXL_75690	APOB	338	NC_000002	chr2	-	21247042	21266834	3128	17	0.341	0.603	-0.34	down	20	9	28	18	9	28	0.00319	0.00194	0.00323	0.00269	0.00314	0.00398	0.00279	0.0006	0.00327	0.00053
GXT_2816566	NM_000384	GXL_75690	APOB	338	NC_000002	chr2	-	21224301	21266945	14121	29	9.98e-26	5.77e-24	-1.08	down	156	121	209	327	138	357	0.00572	0.00578	0.00527	0.0114	0.01173	0.01234	0.00559	0.00023	0.01182	0.00039							1	0.472927
GXT_22215141	AK225922	GXL_190231	OMD	4958	NC_000009	chr9	-	95177351	95186681	1563	3	1.9e-08	3.25e-07	-0.5	down	348	203	495	496	185	478	0.11546	0.08628	0.11365	0.15391	0.14453	0.15136	0.10513	0.01335	0.14993	0.00396		0.090922	0.0023951	0.130856	0.00110644	OMD	1	0.701194	1	0.693533	0	0.0111872
GXT_22744885	ENST00000375550	GXL_190231	OMD	4958	NC_000009	chr9	-	95176527	95186743	2449	3	2.74e-11	6.38e-10	-0.52	down	443	272	633	657	242	624	0.09404	0.07406	0.09289	0.13082	0.12082	0.1263	0.087	0.00916	0.12598	0.00409							1	0.690586
GXT_22786526	AK313055	GXL_190231	OMD	4958	NC_000009	chr9	-	95177434	95186674	1473	3	4.74e-08	7.78e-07	-0.49	down	331	197	472	474	173	457	0.11647	0.0888	0.11495	0.15591	0.14336	0.15351	0.10674	0.0127	0.15093	0.00544							1	0.707215
GXT_24511843	XM_001146269	GXL_190231	OMD	4958	NC_000009	chr9	-	95175266	95179967	3556	2	1.24e-14	3.75e-13	-0.55	down	545	322	739	787	300	757	0.08015	0.06077	0.07488	0.10903	0.10336	0.10581	0.07193	0.00818	0.10607	0.00232							1	0.678137
GXT_2835077	NM_005014	GXL_190231	OMD	4958	NC_000009	chr9	-	95176527	95186836	2542	3	2.74e-11	6.38e-10	-0.52	down	443	272	633	657	242	624	0.0906	0.07135	0.08949	0.12604	0.1164	0.12168	0.08381	0.00882	0.12137	0.00394							1	0.690533
GXT_22219804	NM_001854	GXL_481456	COL11A1	1301	NC_000001	chr1	-	103342023	103574052	7292	67	2.03e-35	1.8e-33	-0.68	down	6935	5461	10863	11767	5012	12550	0.42127	0.42395	0.4569	0.67239	0.71193	0.71944	0.43404	0.0162	0.70125	0.02064		0.415105	0.0131448	0.671662	0.00987116	COL11A1	1	0.618952	1	0.624128	0	0.0365138
GXT_22221020	NM_080629	GXL_481456	COL11A1	1301	NC_000001	chr1	-	103342023	103574052	7328	67	4.38e-36	4.01e-34	-0.68	down	6832	5353	10678	11573	4922	12320	0.41253	0.4135	0.44685	0.65759	0.69551	0.70281	0.42429	0.01595	0.6853	0.01982							1	0.61913
GXT_23211170	AK299025	GXL_481456	COL11A1	1301	NC_000001	chr1	-	103343181	103352471	1067	5	1.37e-39	1.46e-37	-0.74	down	1467	1061	2358	2504	1110	2657	0.66956	0.62483	0.74002	1.07408	1.15705	1.15392	0.67814	0.04742	1.12835	0.0384							1	0.601001
GXT_23512308	ENST00000370090	GXL_481456	COL11A1	1301	NC_000001	chr1	-	103343507	103574035	5443	65	1.84e-42	2.2e-40	-0.69	down	5826	4643	9010	9859	4224	10637	0.46015	0.46992	0.49309	0.73188	0.78061	0.79404	0.47439	0.01381	0.76884	0.02671							1	0.61702
GXT_23512309	ENST00000427239	GXL_481456	COL11A1	1301	NC_000001	chr1	-	103474029	103573734	1709	15	1.67e-20	7.27e-19	-0.61	down	1516	1249	2557	2590	1074	2713	0.4089	0.43358	0.47253	0.66113	0.67119	0.68757	0.43834	0.02619	0.6733	0.0109							1	0.651032
GXT_23734983	ENST00000447608	GXL_481456	COL11A1	1301	NC_000001	chr1	-	103496457	103548415	776	4	1.68e-20	7.33e-19	-0.58	down	632	542	1123	1060	432	1219	0.39682	0.42263	0.47493	0.62135	0.61653	0.70175	0.43146	0.03249	0.64654	0.03909							1	0.667337
GXT_23743676	NM_080630	GXL_481456	COL11A1	1301	NC_000001	chr1	-	103342023	103574052	6944	65	1.84e-37	1.8e-35	-0.69	down	6628	5194	10266	11157	4780	12010	0.42126	0.42183	0.45184	0.66635	0.71015	0.72086	0.43164	0.01428	0.69912	0.02358							1	0.617405
GXT_23743677	NM_001190709	GXL_481456	COL11A1	1301	NC_000001	chr1	-	103342023	103574052	7175	66	4.27e-36	3.92e-34	-0.68	down	6830	5353	10672	11568	4922	12318	0.42118	0.42232	0.45608	0.67126	0.71034	0.71766	0.43319	0.01619	0.69975	0.02037							1	0.619064
GXT_23749942	XM_001139718	GXL_481456	COL11A1	1301	NC_000001	chr1	-	103342028	103496769	6301	64	1.67e-42	2e-40	-0.7	down	5828	4572	9018	9935	4262	10563	0.40007	0.40134	0.42986	0.64285	0.68696	0.68651	0.41042	0.01375	0.67211	0.02069							1	0.610644
GXT_24435947	ENST00000470170	GXL_481456	COL11A1	1301	NC_000001	chr1	-	103343273	103345574	785	2	4.16e-28	2.68e-26	-0.75	down	958	701	1579	1679	733	1773	0.6156	0.58063	0.69781	1.0156	1.08584	1.07912	0.63135	0.04912	1.06019	0.03165							1	0.595506
GXT_24435948	ENST00000465209	GXL_481456	COL11A1	1301	NC_000001	chr1	-	103427301	103428240	297	3	4.02e-24	2.13e-22	-0.84	down	167	133	277	314	135	359	0.2189	0.22311	0.24057	0.38423	0.41329	0.43865	0.22753	0.00938	0.41206	0.02223							1	0.552177
GXT_24435949	ENST00000461720	GXL_481456	COL11A1	1301	NC_000001	chr1	-	103466570	103474049	678	11	3.26e-16	1.11e-14	-0.61	down	451	354	612	748	278	729	0.21074	0.23301	0.20812	0.35303	0.32418	0.34295	0.21729	0.01117	0.34005	0.01195							1	0.638994
GXT_24435950	ENST00000475980	GXL_481456	COL11A1	1301	NC_000001	chr1	-	103466993	103470037	377	5	0.000197	0.00162	-0.45	down	139	88	188	189	71	191	0.10601	0.08459	0.10387	0.14108	0.13359	0.13932	0.09816	0.00963	0.138	0.0032							1	0.711304
GXT_24512256	ENSSSCT00000007510	GXL_481456	COL11A1	1301	NC_000001	chr1	-	103343192	103574239	5979	68	7.86e-39	8.1e-37	-0.68	down	6360	5052	9947	10854	4582	11584	0.46592	0.47295	0.50481	0.74805	0.78595	0.80122	0.48123	0.01692	0.77841	0.02235							1	0.618222
GXT_22018608	NM_000094	GXL_382925	COL7A1	1294	NC_000003	chr3	-	48601506	48632593	9143	118	1.1e-36	1.04e-34	-0.82	down	1725	1424	2531	3335	1396	3211	0.07749	0.08287	0.07853	0.1414	0.14448	0.1368	0.07963	0.00233	0.14089	0.00316		0.0811225	0.00300666	0.146169	0.0076579	COL7A1	1	0.565193	1	0.552428	0	0.0263874
GXT_23509316	ENST00000454817	GXL_382925	COL7A1	1294	NC_000003	chr3	-	48601506	48632593	9047	117	3.47e-37	3.35e-35	-0.82	down	1704	1410	2499	3293	1376	3170	0.0773	0.08292	0.07831	0.141	0.14357	0.13638	0.07951	0.00245	0.14032	0.00297							1	0.566633
GXT_23509317	ENST00000422991	GXL_382925	COL7A1	1294	NC_000003	chr3	-	48607312	48609059	595	9	1.85e-18	7.19e-17	-1.07	down	119	57	148	197	108	192	0.07236	0.05069	0.06343	0.11352	0.1586	0.11234	0.06216	0.00889	0.12815	0.02153							1	0.485057
GXT_24416929	ENST00000470076	GXL_382925	COL7A1	1294	NC_000003	chr3	-	48601506	48602425	651	2	1.07e-15	3.52e-14	-0.82	down	153	121	208	292	110	285	0.11987	0.12394	0.11249	0.21763	0.20492	0.21191	0.11877	0.00474	0.21149	0.0052							1	0.561587
GXT_24416930	ENST00000465238	GXL_382925	COL7A1	1294	NC_000003	chr3	-	48601506	48602452	587	2	7.77e-16	2.57e-14	-0.81	down	151	120	206	288	108	283	0.13115	0.1363	0.12352	0.238	0.22308	0.23334	0.13032	0.00525	0.23147	0.00623							1	0.56301
GXT_24416931	ENST00000487017	GXL_382925	COL7A1	1294	NC_000003	chr3	-	48601506	48621953	5781	83	4.19e-51	6.82e-49	-0.85	down	1126	910	1661	2185	940	2089	0.07649	0.07951	0.07705	0.13948	0.14646	0.13322	0.07768	0.00131	0.13972	0.00541							1	0.555969
GXT_24416932	ENST00000328333	GXL_382925	COL7A1	1294	NC_000003	chr3	-	48601506	48632700	9250	118	1.37e-36	1.29e-34	-0.82	down	1729	1425	2533	3342	1399	3217	0.07678	0.08198	0.0777	0.14014	0.14321	0.13554	0.07882	0.00227	0.13963	0.00315							1	0.564492
GXT_24416933	ENST00000466591	GXL_382925	COL7A1	1294	NC_000003	chr3	-	48601507	48602772	778	3	6.07e-24	3.18e-22	-0.8	down	184	143	261	360	131	330	0.11691	0.11929	0.11567	0.21927	0.19758	0.19894	0.11729	0.0015	0.20526	0.00992							1	0.571422
GXT_24416934	ENST00000474432	GXL_382925	COL7A1	1294	NC_000003	chr3	-	48603973	48604796	728	2	2.51e-13	6.91e-12	-0.95	down	62	74	102	157	65	153	0.03968	0.05953	0.04263	0.08521	0.08214	0.08994	0.04728	0.00875	0.08576	0.00321							1	0.551306
GXT_24416935	ENST00000459756	GXL_382925	COL7A1	1294	NC_000003	chr3	-	48605131	48607874	792	10	6.1e-16	2.04e-14	-0.8	down	146	107	215	296	100	256	0.07009	0.0636	0.07218	0.12932	0.11066	0.11221	0.06862	0.00365	0.1174	0.00845							1	0.584497
GXT_24416936	ENST00000467985	GXL_382925	COL7A1	1294	NC_000003	chr3	-	48605597	48608315	683	11	1.28e-17	4.75e-16	-0.94	down	115	72	167	227	91	205	0.05717	0.05003	0.05925	0.10734	0.10896	0.09855	0.05548	0.00395	0.10495	0.00457							1	0.528633
GXT_24416937	ENST00000462475	GXL_382925	COL7A1	1294	NC_000003	chr3	-	48608327	48608763	305	2	7.83e-05	0.00072	-0.83	down	57	28	61	69	45	76	0.07165	0.05024	0.05185	0.08479	0.14555	0.09664	0.05791	0.00974	0.10899	0.0263							1	0.531333
GXT_2835660	NM_031866	GXL_228013	FZD8	8325	NC_000010	chr10	-	35927177	35930362	3186	1	4.27e-24	2.26e-22	-0.92	down	182	156	252	362	161	363	0.02997	0.03281	0.02854	0.05628	0.06208	0.05674	0.03044	0.00177	0.05837	0.00263		0.03044	0.00177	0.05837	0.00263	FZD8	1	0.521501	1	0.422532	0.00177	0.00263
GXT_22755550	ENST00000295417	GXL_482333	FZD5	7855	NC_000002	chr2	-	208627310	208634287	6708	2	6.73e-103	4.25e-100	-1.62	down	205	124	273	568	256	605	0.01603	0.01247	0.01454	0.04184	0.04668	0.04454	0.01435	0.00146	0.04435	0.00198		0.01588	0.000367881	0.046485	0.00128831	FZD5	1	0.323563	1	0.337864	0	0.0180143
GXT_22784418	AK315338	GXL_482333	FZD5	7855	NC_000002	chr2	-	208631706	208633722	2017	1	4.14e-33	3.34e-31	-1.47	down	96	65	125	253	116	242	0.02497	0.02173	0.02213	0.06195	0.07028	0.05925	0.02294	0.00144	0.06383	0.00469							1	0.359392
GXT_22784605	AK290386	GXL_482333	FZD5	7855	NC_000002	chr2	-	208631667	208633597	1931	1	1.62e-34	1.38e-32	-1.46	down	92	62	115	240	109	228	0.02499	0.02165	0.02152	0.06162	0.0693	0.05877	0.02272	0.00161	0.06323	0.00445							1	0.359323
GXT_2778021	AK024850	GXL_482333	FZD5	7855	NC_000002	chr2	-	208627322	208629784	2463	1	4.08e-47	5.67e-45	-1.64	down	48	33	83	155	64	177	0.01022	0.00905	0.01217	0.0312	0.03192	0.03579	0.01048	0.00129	0.03297	0.00202							1	0.317865
GXT_2782931	AK000125	GXL_482333	FZD5	7855	NC_000002	chr2	-	208627310	208629075	1766	1	1.5e-27	9.48e-26	-1.55	down	38	26	50	95	46	121	0.01129	0.00993	0.01023	0.02667	0.03198	0.03413	0.01048	0.00058	0.03093	0.00314							1	0.33883
GXT_2817161	NM_003468	GXL_482333	FZD5	7855	NC_000002	chr2	-	208627310	208634143	6564	2	2.93e-108	2.01e-105	-1.6	down	199	121	268	547	245	585	0.0159	0.01243	0.01459	0.04117	0.04564	0.044	0.01431	0.00143	0.0436	0.00185							1	0.328211
GXT_22784955	AK290375	GXL_171122	WNT5A	7474	NC_000003	chr3	-	55503938	55521333	1645	5	3.69e-20	1.57e-18	-0.64	down	832	609	1180	1332	546	1349	0.25164	0.24105	0.24969	0.38448	0.38881	0.38889	0.24746	0.0046	0.38739	0.00206		0.219944	0.00408967	0.361114	0.0111543	WNT5A	1	0.638788	1	0.610778	0	0.0388904
GXT_22785042	AK290869	GXL_171122	WNT5A	7474	NC_000003	chr3	-	55504021	55515403	1281	5	1.87e-20	8.13e-19	-0.65	down	741	535	1028	1180	488	1177	0.28639	0.27083	0.27829	0.43557	0.44286	0.43268	0.2785	0.00635	0.43704	0.00428							1	0.637241
GXT_23509536	ENST00000442038	GXL_171122	WNT5A	7474	NC_000003	chr3	-	55504070	55521333	711	4	1.64e-12	4.22e-11	-0.61	down	264	193	362	376	172	436	0.1809	0.1745	0.17321	0.2473	0.27617	0.28503	0.1762	0.00336	0.2695	0.01611							1	0.653803
GXT_23733856	ENST00000474267	GXL_171122	WNT5A	7474	NC_000003	chr3	-	55499743	55523973	6042	6	1.12e-44	1.44e-42	-0.76	down	2755	2011	4222	4877	1932	5195	0.23546	0.22205	0.24986	0.39559	0.38746	0.4229	0.23579	0.01136	0.40198	0.01516							1	0.586571
GXT_24436938	ENST00000493406	GXL_171122	WNT5A	7474	NC_000003	chr3	-	55503416	55504169	521	2	9.23e-22	4.38e-20	-0.85	down	224	159	350	435	150	476	0.22548	0.20578	0.2427	0.41382	0.35342	0.45507	0.22465	0.01508	0.40744	0.04174							1	0.55137
GXT_24436939	ENST00000482079	GXL_171122	WNT5A	7474	NC_000003	chr3	-	55508362	55515224	959	3	1.49e-26	8.94e-25	-0.65	down	458	321	645	752	277	763	0.23197	0.21331	0.2292	0.36348	0.32419	0.36797	0.22483	0.00822	0.35188	0.01967							1	0.638939
GXT_24436940	ENST00000497817	GXL_171122	WNT5A	7474	NC_000003	chr3	-	55513068	55514948	661	2	4.79e-13	1.29e-11	-0.62	down	251	179	358	390	158	412	0.1816	0.17021	0.18209	0.27048	0.26295	0.285	0.17797	0.00549	0.27281	0.00915							1	0.652359
GXT_2772972	AK090582	GXL_171122	WNT5A	7474	NC_000003	chr3	-	55501607	55521670	2976	6	3.73e-44	4.69e-42	-0.71	down	1373	958	2062	2359	916	2381	0.23657	0.21412	0.24668	0.38588	0.37174	0.39151	0.23246	0.01361	0.38304	0.00832							1	0.606882
GXT_2778175	AK021503	GXL_171122	WNT5A	7474	NC_000003	chr3	-	55499750	55501807	1879	2	3.73e-44	4.69e-42	-0.83	down	569	424	866	1038	439	1124	0.15886	0.15209	0.16643	0.27389	0.28675	0.29799	0.15913	0.00586	0.28621	0.00985							1	0.55599
GXT_2828385	NM_003392	GXL_171122	WNT5A	7474	NC_000003	chr3	-	55499743	55521331	5838	5	5.29e-45	6.87e-43	-0.76	down	2738	1997	4196	4845	1924	5170	0.24216	0.22819	0.25699	0.4067	0.39932	0.43554	0.24245	0.01176	0.41385	0.01563							1	0.58584
GXT_22814805	ENSGALT00000040130	GXL_134219	WNT8B	7479	NC_000010	chr10	+	102239631	102242438	819	4	1	1	-0.48	down	0	0	1	1	0	0	0	0	0.00044	0.00061	0	0	0.00015	0.00021	0.0002	0.00029		0.000213333	7.81025e-05	0.00029	0.000106927	WNT8B	1	0.75	1	0.737522	0	0.0115263
GXT_23221884	XM_001500014	GXL_134219	WNT8B	7479	NC_000010	chr10	+	102221420	102242573	1000	6	1	1	-0.48	down	0	0	2	2	0	0	0	0	0.00072	0.00099	0	0	0.00024	0.00034	0.00033	0.00047						WNT8B	1	0.727273
GXT_23224387	ENSMMUT00000009259	GXL_134219	WNT8B	7479	NC_000010	chr10	+	102238810	102242573	981	5	1	1	-0.48	down	0	0	2	2	0	0	0	0	0.00074	0.00101	0	0	0.00025	0.00035	0.00034	0.00048						WNT8B	1	0.735294
GXT_22028799	NM_033138	GXL_78319	CALD1	800	NC_000007	chr7	+	134464164	134655480	5232	15	2.31e-19	9.43e-18	-0.63	down	47975	34263	71074	76707	31069	79467	4.48891	4.10697	4.59394	6.7937	6.83725	7.09457	4.39661	0.20924	6.90851	0.13276		3.80942	0.0764467	5.87997	0.0624269	CALD1	1	0.636405	1	0.666773	0	0.0599412
GXT_22769194	ENST00000361388	GXL_78319	CALD1	800	NC_000007	chr7	+	134464171	134655470	4528	15	1.85e-19	7.61e-18	-0.63	down	47628	34046	70634	76182	30859	78945	5.14712	4.71367	5.27344	7.79303	7.84405	8.14092	5.04474	0.23972	7.926	0.15339						CALD1	1	0.63648
GXT_22769195	ENST00000361901	GXL_78319	CALD1	800	NC_000007	chr7	+	134464429	134655392	4114	14	1.36e-19	5.6e-18	-0.63	down	47297	33836	70186	75723	30666	78529	5.62319	5.154	5.76526	8.52292	8.57709	8.91034	5.51415	0.26119	8.67012	0.1713						CALD1	1	0.635995
GXT_22792653	AK289686	GXL_78319	CALD1	800	NC_000007	chr7	+	134464171	134653610	2665	15	6.03e-20	2.54e-18	-0.6	down	28237	20127	40534	44346	17543	45134	4.97654	4.53655	4.92998	7.39574	7.26847	7.58563	4.81436	0.19736	7.41661	0.13032						CALD1	1	0.649132
GXT_23217415	AK298524	GXL_78319	CALD1	800	NC_000007	chr7	+	134464385	134653715	2115	14	1.27e-21	6e-20	-0.6	down	25178	17945	36234	39515	15595	40349	5.54747	5.05558	5.50978	8.23002	8.07824	8.47791	5.37094	0.22353	8.26206	0.16473						CALD1	1	0.650073
GXT_23217445	AK304729	GXL_78319	CALD1	800	NC_000007	chr7	+	134464388	134653404	1938	14	3.84e-23	1.95e-21	-0.6	down	22829	16288	32500	36102	14039	36284	5.36194	4.88094	5.26182	8.02527	7.76001	8.12206	5.16823	0.20722	7.96911	0.15305						CALD1	1	0.648533
GXT_23390959	AK300282	GXL_78319	CALD1	800	NC_000007	chr7	+	134605231	134653293	1984	12	9.11e-24	4.74e-22	-0.61	down	22564	16015	31688	35434	13892	35984	5.2137	4.72575	5.04209	7.74554	7.54013	7.94208	4.99385	0.2021	7.74258	0.16411						CALD1	1	0.644985
GXT_23522668	ENST00000417172	GXL_78319	CALD1	800	NC_000007	chr7	+	134429003	134653153	1915	14	7.85e-23	3.94e-21	-0.6	down	23766	16934	33620	37237	14650	37806	5.64511	5.13336	5.496	8.36443	8.17409	8.56572	5.42482	0.2149	8.36808	0.1599						CALD1	1	0.648275
GXT_23522671	ENST00000432646	GXL_78319	CALD1	800	NC_000007	chr7	+	134464171	134647669	2163	14	3.09e-23	1.57e-21	-0.6	down	22881	16152	32258	35604	14039	36106	4.90449	4.42691	4.75989	7.22025	7.06475	7.37559	4.6971	0.19996	7.2202	0.1269						CALD1	1	0.65055
GXT_23522674	ENST00000445569	GXL_78319	CALD1	800	NC_000007	chr7	+	134528633	134617874	527	5	1.18e-26	7.16e-25	-0.58	down	5191	3791	7518	8000	3329	8014	4.58421	4.2708	4.54249	6.67461	6.84819	6.70375	4.46583	0.13896	6.74218	0.0759						CALD1	1	0.662372
GXT_23522675	ENST00000435928	GXL_78319	CALD1	800	NC_000007	chr7	+	134551592	134613651	458	3	5.58e-24	2.93e-22	-0.58	down	2956	2131	4137	4561	1868	4401	2.9658	2.71911	2.81995	4.33027	4.36191	4.15675	2.83495	0.10127	4.28298	0.09019						CALD1	1	0.661911
GXT_23522676	ENST00000443197	GXL_78319	CALD1	800	NC_000007	chr7	+	134576209	134655392	4173	13	1.27e-20	5.57e-19	-0.64	down	44716	31917	66227	71640	28999	74422	5.26203	4.8142	5.386	7.9813	8.02681	8.3618	5.15408	0.2456	8.1233	0.16966						CALD1	1	0.634481
GXT_23522677	ENST00000424922	GXL_78319	CALD1	800	NC_000007	chr7	+	134576361	134653610	2124	12	2.39e-21	1.1e-19	-0.61	down	25758	18342	36785	40530	15976	41315	5.65755	5.14995	5.57532	8.42041	8.24496	8.66656	5.46094	0.22245	8.44398	0.17292						CALD1	1	0.646726
GXT_23740105	ENST00000436461	GXL_78319	CALD1	800	NC_000007	chr7	+	134430218	134644807	1614	11	7.31e-26	4.26e-24	-0.61	down	20561	14384	28841	32167	12591	32737	5.86362	5.2489	5.66291	8.67163	8.42866	8.91087	5.59181	0.25594	8.67039	0.19686						CALD1	1	0.644932
GXT_23744917	NM_033157	GXL_78319	CALD1	800	NC_000007	chr7	+	134464164	134655480	4542	15	1.31e-19	5.4e-18	-0.63	down	47211	33709	69995	75468	30580	78272	5.11075	4.67763	5.23542	7.73592	7.78771	8.08392	5.00793	0.23904	7.86918	0.15331						CALD1	1	0.636398
GXT_24494713	ENST00000454108	GXL_78319	CALD1	800	NC_000007	chr7	+	134464376	134613651	558	5	3.27e-19	1.32e-17	-0.57	down	4357	3204	6336	6761	2781	6608	3.6029	3.37744	3.59096	5.28459	5.38301	5.15541	3.52377	0.10358	5.27434	0.0932						CALD1	1	0.668097
GXT_24494714	ENST00000475772	GXL_78319	CALD1	800	NC_000007	chr7	+	134464385	134552992	753	3	9.69e-24	5.04e-22	-0.56	down	2860	2106	4359	4476	1821	4454	1.7542	1.64506	1.84187	2.59134	2.62775	2.57154	1.74704	0.08051	2.59688	0.02328						CALD1	1	0.672746
GXT_24494715	ENST00000462181	GXL_78319	CALD1	800	NC_000007	chr7	+	134464390	134506812	188	2	7.41e-10	1.49e-08	-0.48	down	630	453	937	941	391	851	1.67594	1.5379	1.7383	2.35026	2.44346	2.14117	1.65071	0.08374	2.31163	0.1264						CALD1	1	0.714089
GXT_24494716	ENST00000361675	GXL_78319	CALD1	800	NC_000007	chr7	+	134464401	134654097	3612	15	4.04e-19	1.63e-17	-0.61	down	33069	23546	47770	52152	20685	53229	4.33807	3.94886	4.32388	6.471	6.37499	6.65927	4.2036	0.18022	6.50175	0.11808						CALD1	1	0.646534
GXT_24494717	ENST00000482470	GXL_78319	CALD1	800	NC_000007	chr7	+	134464401	134647140	3941	11	9.06e-23	4.53e-21	-0.6	down	23375	16552	33044	36448	14362	36907	2.72617	2.46565	2.6515	4.0183	3.92961	4.10163	2.61444	0.10954	4.01651	0.07024						CALD1	1	0.650923
GXT_24494718	ENST00000498254	GXL_78319	CALD1	800	NC_000007	chr7	+	134464466	134552726	443	4	1.36e-27	8.61e-26	-0.58	down	2297	1705	3492	3643	1465	3698	2.31505	2.18603	2.42369	3.47298	3.47996	3.52101	2.30826	0.09714	3.49132	0.02119						CALD1	1	0.661142
GXT_24494719	ENST00000489019	GXL_78319	CALD1	800	NC_000007	chr7	+	134528633	134584804	424	3	3.51e-28	2.27e-26	-0.58	down	2206	1637	3387	3499	1415	3563	2.34188	2.21369	2.4692	3.51802	3.5387	3.56877	2.34159	0.10431	3.54183	0.02084						CALD1	1	0.661124
GXT_24494720	ENST00000495522	GXL_78319	CALD1	800	NC_000007	chr7	+	134576361	134653610	2199	13	1.52e-21	7.11e-20	-0.61	down	25355	18016	36167	39852	15716	40655	5.425	4.93263	5.34276	8.07142	7.90556	8.30699	5.23346	0.21535	8.09466	0.1647						CALD1	1	0.646532
GXT_24494721	ENST00000496024	GXL_78319	CALD1	800	NC_000007	chr7	+	134605317	134617993	557	3	4.57e-27	2.82e-25	-0.63	down	5062	3582	6982	7744	3269	7979	4.50951	4.0835	4.26629	6.52196	6.76975	6.77891	4.28643	0.1745	6.69021	0.11903						CALD1	1	0.640702
GXT_24494722	ENST00000478075	GXL_78319	CALD1	800	NC_000007	chr7	+	134625892	134629302	193	2	1.46e-29	1.02e-27	-0.63	down	995	664	1480	1638	593	1632	2.32261	1.99392	2.42426	3.69261	3.32655	3.66131	2.24693	0.18365	3.56016	0.16568						CALD1	1	0.631132
GXT_24494723	ENST00000472096	GXL_78319	CALD1	800	NC_000007	chr7	+	134625933	134632853	651	2	4.15e-32	3.21e-30	-0.58	down	4436	2912	5821	6667	2426	6731	3.12541	2.64204	2.8355	4.47002	4.03495	4.52943	2.86765	0.19864	4.3448	0.22044						CALD1	1	0.660019
GXT_24494724	ENST00000466704	GXL_78319	CALD1	800	NC_000007	chr7	+	134635126	134653626	903	7	2.98e-26	1.76e-24	-0.57	down	10085	7696	15253	16189	6447	16249	4.96439	4.81726	5.19876	7.51742	7.46739	7.61366	4.99347	0.1571	7.53282	0.0607						CALD1	1	0.662895
GXT_24494725	ENST00000473714	GXL_78319	CALD1	800	NC_000007	chr7	+	134645282	134650188	230	2	1.32e-19	5.46e-18	-0.57	down	1907	1549	2849	3117	1253	3084	3.41447	3.55306	3.54336	5.35184	5.35377	5.27926	3.50363	0.06317	5.32829	0.03468						CALD1	1	0.657552
GXT_24494726	ENST00000480638	GXL_78319	CALD1	800	NC_000007	chr7	+	134649962	134653474	560	2	5.74e-31	4.24e-29	-0.63	down	4154	3081	6343	6829	2697	7028	3.61392	3.41469	3.82967	5.61506	5.534	5.83342	3.61943	0.16946	5.66083	0.12645						CALD1	1	0.639382
GXT_24510355	ENSMUST00000132331	GXL_78319	CALD1	800	NC_000007	chr7	+	134644725	134645617	471	2	2.09e-24	1.12e-22	-0.55	down	2741	2084	4007	4215	1723	4291	2.63142	2.56858	2.66894	3.84174	3.91628	3.92632	2.62298	0.0414	3.89478	0.03773						CALD1	1	0.67346
GXT_2760700	AK022456	GXL_78281	CALD1	800	NC_000007	chr7	+	134620762	134622387	1626	1	0.289	0.544	-0.14	down	289	147	419	306	118	300	0.0932	0.06095	0.09308	0.0933	0.08908	0.09188	0.08241	0.01517	0.09142	0.00175						CALD1	1	0.901444
GXT_2760709	AK022222	GXL_78319	CALD1	800	NC_000007	chr7	+	134574565	134576496	1932	1	0.119	0.303	-0.37	down	11	16	10	21	7	15	0.0026	0.005	0.00181	0.00493	0.00415	0.00372	0.00314	0.00136	0.00427	0.0005						CALD1	1	0.735363
GXT_2760722	AK021691	GXL_78281	CALD1	800	NC_000007	chr7	+	134621217	134623392	2176	1	0.114	0.294	-0.16	down	453	230	577	469	183	441	0.10918	0.07126	0.09578	0.10685	0.10324	0.10093	0.09207	0.0157	0.10367	0.00244						CALD1	1	0.888106
GXT_2792305	NM_033139	GXL_78319	CALD1	800	NC_000007	chr7	+	134576151	134655480	4282	13	1.3e-20	5.68e-19	-0.64	down	44753	31946	66276	71706	29037	74483	5.1324	4.69591	5.25261	7.78495	7.83229	8.15552	5.02697	0.23919	7.92425	0.16467						CALD1	1	0.634378
GXT_2792306	NM_033140	GXL_78319	CALD1	800	NC_000007	chr7	+	134576151	134655480	4204	12	1.28e-20	5.61e-19	-0.64	down	44734	31933	66249	71664	29018	74463	5.22555	4.78127	5.34822	7.92527	7.9733	8.305	5.11835	0.24355	8.06786	0.16883						CALD1	1	0.634412
GXT_2813481	NM_004342	GXL_78319	CALD1	800	NC_000007	chr7	+	134464164	134655480	4467	14	1.84e-19	7.55e-18	-0.63	down	47614	34035	70613	76146	30840	78932	5.21605	4.77668	5.3442	7.89623	7.94711	8.25115	5.11231	0.24302	8.0315	0.1567						CALD1	1	0.636532
GXT_22774615	ENST00000374830	GXL_59104	ALPL	249	NC_000001	chr1	+	21896796	21904224	733	4	0.43	0.684	-0.11	down	4	13	17	16	3	14	0.00286	0.01196	0.00839	0.00978	0.00502	0.00859	0.00774	0.00374	0.0078	0.00202		0.0087625	0.000787383	0.008465	0.000706536	ALPL	1	0.992308	1	1.03625	0	0.0397845
GXT_22790010	AK312667	GXL_59104	ALPL	249	NC_000001	chr1	+	21835919	21904141	1771	12	0.471	0.714	-0.02	down	30	30	40	44	10	35	0.008	0.01142	0.00755	0.01064	0.00555	0.00872	0.00899	0.00173	0.0083	0.0021						ALPL	1	1.08313
GXT_23390265	AK295608	GXL_59104	ALPL	249	NC_000001	chr1	+	21835919	21904892	2241	10	0.736	0.907	0	down	38	40	59	49	17	48	0.00835	0.01204	0.00914	0.00969	0.0087	0.00978	0.00984	0.00159	0.00939	0.00049						ALPL	1	1.04792
GXT_23390302	AK293184	GXL_59104	ALPL	249	NC_000001	chr1	+	21835933	21904295	1870	12	0.435	0.684	-0.08	down	29	30	42	44	12	35	0.00749	0.01082	0.00767	0.01029	0.00657	0.00826	0.00866	0.00153	0.00837	0.00152						ALPL	1	1.03465
GXT_23745766	NM_001177520	GXL_59104	ALPL	249	NC_000001	chr1	+	21835858	21904905	2315	10	0.695	0.88	-0.01	down	38	40	59	50	17	48	0.00809	0.01165	0.00885	0.0096	0.00843	0.00947	0.00953	0.00153	0.00917	0.00052						ALPL	1	1.03926
GXT_23749921	XR_024938	GXL_59104	ALPL	249	NC_000001	chr1	+	21835561	21905588	1836	13	0.573	0.794	-0.01	down	29	26	33	38	10	29	0.00743	0.00955	0.00591	0.00874	0.00535	0.00678	0.00763	0.00149	0.00696	0.00139						ALPL	1	1.09626
GXT_2739368	AK097413	GXL_59104	ALPL	249	NC_000001	chr1	+	21900971	21904892	1595	4	0.881	0.998	-0.05	down	18	24	39	25	12	29	0.00592	0.01015	0.00884	0.00729	0.00924	0.00874	0.0083	0.00177	0.00842	0.00083						ALPL	1	0.985748
GXT_2807833	NM_000478	GXL_59104	ALPL	249	NC_000001	chr1	+	21835858	21904905	2596	12	0.599	0.81	-0.06	down	44	43	66	57	21	52	0.00829	0.01117	0.00877	0.00974	0.00899	0.00921	0.00941	0.00126	0.00931	0.00031						ALPL	1	1.01074
																																								#DIV/0!	#DIV/0!
																																								#DIV/0!	#DIV/0!
																																								#DIV/0!	#DIV/0!
																																								#DIV/0!	#DIV/0!
																																								#DIV/0!	#DIV/0!
																																								#DIV/0!	#DIV/0!
																																								#DIV/0!	#DIV/0!
																																								#DIV/0!	#DIV/0!
																																								#DIV/0!	#DIV/0!
																																								#DIV/0!	#DIV/0!
																																								#DIV/0!	#DIV/0!
																																								#DIV/0!	#DIV/0!
																																								#DIV/0!	#DIV/0!
																																								#DIV/0!	#DIV/0!
																																								#DIV/0!	#DIV/0!
																																								#DIV/0!	#DIV/0!
																																								#DIV/0!	#DIV/0!
																																								#DIV/0!	#DIV/0!
																																								#DIV/0!	#DIV/0!
																																						#DIV/0!	#DIV/0!	#DIV/0!	#DIV/0!
																																						#DIV/0!	#DIV/0!	#DIV/0!	#DIV/0!
																																						#DIV/0!	#DIV/0!	#DIV/0!	#DIV/0!
																																						#DIV/0!	#DIV/0!	#DIV/0!	#DIV/0!
																																						#DIV/0!	#DIV/0!	#DIV/0!	#DIV/0!
																																						#DIV/0!	#DIV/0!	#DIV/0!	#DIV/0!
																																						#DIV/0!	#DIV/0!	#DIV/0!
																																						#DIV/0!	#DIV/0!	#DIV/0!
																																						#DIV/0!	#DIV/0!	#DIV/0!
																																						#DIV/0!	#DIV/0!	#DIV/0!
																																						#DIV/0!	#DIV/0!	#DIV/0!
																																						#DIV/0!	#DIV/0!	#DIV/0!
																																						#DIV/0!	#DIV/0!	#DIV/0!
																																						#DIV/0!	#DIV/0!	#DIV/0!
																																						#DIV/0!	#DIV/0!	#DIV/0!
																																						#DIV/0!	#DIV/0!	#DIV/0!
																																						#DIV/0!	#DIV/0!	#DIV/0!
																																						#DIV/0!	#DIV/0!	#DIV/0!
																																						#DIV/0!	#DIV/0!	#DIV/0!
																																						#DIV/0!	#DIV/0!	#DIV/0!
																																						#DIV/0!	#DIV/0!	#DIV/0!
																																						#DIV/0!	#DIV/0!	#DIV/0!
																																							#DIV/0!	#DIV/0!
																																							#DIV/0!	#DIV/0!
																																							#DIV/0!	#DIV/0!
																																							#DIV/0!	#DIV/0!
																																							#DIV/0!	#DIV/0!
																																							#DIV/0!	#DIV/0!
																																							#DIV/0!	#DIV/0!
																																							#DIV/0!	#DIV/0!
																																							#DIV/0!	#DIV/0!
																																							#DIV/0!	#DIV/0!
																																							#DIV/0!	#DIV/0!
																																							#DIV/0!	#DIV/0!
																																							#DIV/0!	#DIV/0!
																																							#DIV/0!	#DIV/0!
																																							#DIV/0!	#DIV/0!
																																							#DIV/0!	#DIV/0!
																																							#DIV/0!	#DIV/0!
																																							#DIV/0!	#DIV/0!
																																							#DIV/0!	#DIV/0!
																																							#DIV/0!	#DIV/0!
																																							#DIV/0!	#DIV/0!
																																							#DIV/0!	#DIV/0!
																																							#DIV/0!	#DIV/0!
																																							#DIV/0!	#DIV/0!
																																							#DIV/0!	#DIV/0!
																																							#DIV/0!	#DIV/0!
																																							#DIV/0!	#DIV/0!
																																							#DIV/0!	#DIV/0!
																																							#DIV/0!	#DIV/0!
																																							#DIV/0!	#DIV/0!
																																							#DIV/0!	#DIV/0!
																																								#DIV/0!
																																								#DIV/0!
																																								#DIV/0!
																																								#DIV/0!
																																								#DIV/0!
																																								#DIV/0!
																																								#DIV/0!
																																								#DIV/0!
																																								#DIV/0!
																																								#DIV/0!

## Sheet: Ctrlsi Undiff
TranscriptId	Accn	LocusId	Symbol	GeneId	ContigAccn	Chromosome	Strand	Start	End	Transcript length	#exons	p-value	adj. p-value	log2(fold change)	Regulation	#reads treat1	#reads treat2	#reads treat3	#reads ctrl1	#reads ctrl2	#reads ctrl3	NE treat1	NE treat2	NE treat3	NE ctrl1	NE ctrl2	NE ctrl3	mean NE(treat)	stddev NE(treat)	mean NE(ctrl)	stddev NE(ctrl)
GXT_22737047	ENST00000262878	GXL_122630	SAMHD1	25939	NC_000020	chr20	-	35518632	35580246	4784	16	0	0	2.53	up	3490	1526	3214	647	465	405	0.34297	0.37067	0.31958	0.05814	0.05821	0.06924	0.34441	0.02088	0.06186	0.00522
GXT_22778506	ENST00000373694	GXL_122630	SAMHD1	25939	NC_000020	chr20	-	35526174	35580176	1822	14	0	0	2.41	up	1320	580	1217	268	199	161	0.31453	0.34121	0.29749	0.05832	0.06056	0.067	0.31774	0.01799	0.06196	0.00368
GXT_22783996	AK311150	GXL_122630	SAMHD1	25939	NC_000020	chr20	-	35520227	35533811	1519	4	0	0	2.59	up	1294	567	1194	241	171	134	0.41076	0.44346	0.38212	0.07078	0.07016	0.07421	0.41211	0.02506	0.07172	0.00178
GXT_22784010	AK315169	GXL_122630	SAMHD1	25939	NC_000020	chr20	-	35521335	35580179	2014	16	0	0	2.43	up	1491	650	1360	297	212	184	0.32267	0.34715	0.30075	0.05874	0.05821	0.06991	0.32352	0.01895	0.06229	0.00539
GXT_22815242	ENSMODT00000001575	GXL_122630	SAMHD1	25939	NC_000020	chr20	-	35526179	35532652	268	2	7.51e-60	2.63e-58	2.58	up	160	85	146	35	26	14	0.26271	0.35014	0.24223	0.0555	0.05652	0.0397	0.28503	0.0468	0.05057	0.0077
GXT_23211476	AK304795	GXL_122630	SAMHD1	25939	NC_000020	chr20	-	35540751	35580111	1394	11	2e-304	6e-302	2.43	up	980	404	881	188	139	117	0.30226	0.30752	0.27936	0.05204	0.05395	0.06347	0.29638	0.01223	0.05649	0.005
GXT_23211489	AK304187	GXL_122630	SAMHD1	25939	NC_000020	chr20	-	35521054	35580075	2121	16	0	0	2.39	up	1600	680	1433	319	239	196	0.33363	0.34932	0.30459	0.06136	0.06369	0.07168	0.32918	0.01853	0.06558	0.00442
GXT_24430838	ENST00000465985	GXL_122630	SAMHD1	25939	NC_000020	chr20	-	35525971	35533797	516	3	1.01e-53	3.19e-52	2.66	up	185	96	159	39	28	14	0.15095	0.19673	0.13331	0.03067	0.03107	0.02062	0.16033	0.02673	0.02745	0.00483
GXT_2782290	AK027811	GXL_122630	SAMHD1	25939	NC_000020	chr20	-	35521097	35580219	2292	16	0	0	2.4	up	1692	719	1533	334	251	209	0.32702	0.34201	0.30186	0.05898	0.062	0.07085	0.32363	0.01657	0.06394	0.00504
GXT_2840671	NM_015474	GXL_122630	SAMHD1	25939	NC_000020	chr20	-	35520227	35580246	3189	16	4.8e-269	9.11e-267	2.48	up	2487	1077	2300	482	351	289	0.35863	0.38338	0.33669	0.06358	0.06454	0.07245	0.35957	0.01907	0.06686	0.00397
GXT_22792518	AK313553	GXL_78423	LEP	3952	NC_000007	chr7	+	127881333	127894816	559	3	9.61e-212	1.32e-209	5.63	up	434	165	366	10	6	5	0.3714	0.35146	0.3163	0.00817	0.00684	0.00773	0.34639	0.02278	0.00758	0.00055
GXT_2809221	NM_000230	GXL_78423	LEP	3952	NC_000007	chr7	+	127881331	127897682	3427	3	0	0	5.74	up	2303	909	2045	51	34	22	0.33076	0.32385	0.29561	0.0068	0.00632	0.00555	0.31674	0.01521	0.00622	0.00051
GXT_22784708	AK290844	GXL_75690	APOB	338	NC_000002	chr2	-	21239311	21266945	3460	21	1.15e-23	1.97e-22	Inf	up	31	12	39	0	0	0	0.00434	0.0039	0.0051	0	0	0	0.00445	0.0005	0	0
GXT_22814177	ENSECAT00000009311	GXL_75690	APOB	338	NC_000002	chr2	-	21224659	21266427	13509	28	5.56e-188	6.6e-186	Inf	up	314	131	333	0	0	0	0.01144	0.01168	0.01205	0	0	0	0.01172	0.00025	0	0
GXT_23205255	ENST00000399256	GXL_75690	APOB	338	NC_000002	chr2	-	21247042	21266834	3128	17	2.49e-16	3.33e-15	Inf	up	18	9	28	0	0	0	0.00269	0.00314	0.00398	0	0	0	0.00327	0.00053	0	0
GXT_2816566	NM_000384	GXL_75690	APOB	338	NC_000002	chr2	-	21224301	21266945	14121	29	2.48e-197	3.11e-195	Inf	up	327	138	357	0	0	0	0.0114	0.01173	0.01234	0	0	0	0.01182	0.00039	0	0
GXT_22215141	AK225922	GXL_190231	OMD	4958	NC_000009	chr9	-	95177351	95186681	1563	3	2.11e-248	3.64e-246	3.89	up	496	185	478	38	27	18	0.15391	0.14453	0.15136	0.0111	0.0106	0.00995	0.14993	0.00396	0.01055	0.00047
GXT_22744885	ENST00000375550	GXL_190231	OMD	4958	NC_000009	chr9	-	95176527	95186743	2449	3	0	0	4.01	up	657	242	624	46	35	20	0.13082	0.12082	0.1263	0.00858	0.00885	0.00705	0.12598	0.00409	0.00816	0.00079
GXT_22786526	AK313055	GXL_190231	OMD	4958	NC_000009	chr9	-	95177434	95186674	1473	3	2.93e-247	4.96e-245	3.84	up	474	173	457	36	27	18	0.15591	0.14336	0.15351	0.01116	0.01125	0.01056	0.15093	0.00544	0.01099	0.00031
GXT_24511843	XM_001146269	GXL_190231	OMD	4958	NC_000009	chr9	-	95175266	95179967	3556	2	0	0	4.11	up	787	300	757	52	41	22	0.10903	0.10336	0.10581	0.00668	0.00727	0.00534	0.10607	0.00232	0.00643	0.00081
GXT_2835077	NM_005014	GXL_190231	OMD	4958	NC_000009	chr9	-	95176527	95186836	2542	3	0	0	4.01	up	657	242	624	46	35	20	0.12604	0.1164	0.12168	0.00826	0.00852	0.0068	0.12137	0.00394	0.00786	0.00076
GXT_22219804	NM_001854	GXL_481456	COL11A1	1301	NC_000001	chr1	-	103342023	103574052	7292	67	0	0	2.51	up	11767	5012	12550	2433	1711	1335	0.67239	0.71193	0.71944	0.12925	0.12608	0.1326	0.70125	0.02064	0.12931	0.00266
GXT_22221020	NM_080629	GXL_481456	COL11A1	1301	NC_000001	chr1	-	103342023	103574052	7328	67	0	0	2.5	up	11573	4922	12320	2379	1687	1314	0.65759	0.69551	0.70281	0.12569	0.12375	0.1298	0.6853	0.01982	0.12641	0.00252
GXT_23211170	AK299025	GXL_481456	COL11A1	1301	NC_000001	chr1	-	103343181	103352471	1067	5	0	0	2.62	up	2504	1110	2657	473	335	273	1.07408	1.15705	1.15392	0.1883	0.18447	0.20319	1.12835	0.0384	0.19199	0.00807
GXT_23512308	ENST00000370090	GXL_481456	COL11A1	1301	NC_000001	chr1	-	103343507	103574035	5443	65	0	0	2.5	up	9859	4224	10637	2024	1468	1128	0.73188	0.78061	0.79404	0.14005	0.14133	0.14648	0.76884	0.02671	0.14262	0.00278
GXT_23512309	ENST00000427239	GXL_481456	COL11A1	1301	NC_000001	chr1	-	103474029	103573734	1709	15	0	0	2.43	up	2590	1074	2713	590	362	310	0.66113	0.67119	0.68757	0.13881	0.11985	0.13285	0.6733	0.0109	0.1305	0.00792
GXT_23734983	ENST00000447608	GXL_481456	COL11A1	1301	NC_000001	chr1	-	103496457	103548415	776	4	2.71e-221	4e-219	2.42	up	1060	432	1219	247	151	133	0.62135	0.61653	0.70175	0.13255	0.11216	0.13236	0.64654	0.03909	0.12569	0.00957
GXT_23743676	NM_080630	GXL_481456	COL11A1	1301	NC_000001	chr1	-	103342023	103574052	6944	65	0	0	2.52	up	11157	4780	12010	2294	1623	1265	0.66635	0.71015	0.72086	0.12753	0.12499	0.13186	0.69912	0.02358	0.12813	0.00284
GXT_23743677	NM_001190709	GXL_481456	COL11A1	1301	NC_000001	chr1	-	103342023	103574052	7175	66	0	0	2.51	up	11568	4922	12318	2377	1686	1314	0.67126	0.71034	0.71766	0.12827	0.1263	0.13257	0.69975	0.02037	0.12905	0.00262
GXT_23749942	XM_001139718	GXL_481456	COL11A1	1301	NC_000001	chr1	-	103342028	103496769	6301	64	0	0	2.52	up	9935	4262	10563	2010	1443	1112	0.64285	0.68696	0.68651	0.12074	0.12038	0.12537	0.67211	0.02069	0.12216	0.00227
GXT_24435947	ENST00000470170	GXL_481456	COL11A1	1301	NC_000001	chr1	-	103343273	103345574	785	2	0	0	2.59	up	1679	733	1773	319	228	187	1.0156	1.08584	1.07912	0.17768	0.17878	0.19496	1.06019	0.03165	0.18381	0.0079
GXT_24435948	ENST00000465209	GXL_481456	COL11A1	1301	NC_000001	chr1	-	103427301	103428240	297	3	2.01e-92	1.05e-90	2.72	up	314	135	359	63	37	31	0.38423	0.41329	0.43865	0.07108	0.06534	0.06934	0.41206	0.02223	0.06859	0.0024
GXT_24435949	ENST00000461720	GXL_481456	COL11A1	1301	NC_000001	chr1	-	103466570	103474049	678	11	0	0	2.37	up	748	278	729	141	117	90	0.35303	0.32418	0.34295	0.05831	0.07237	0.07337	0.34005	0.01195	0.06802	0.00688
GXT_24435950	ENST00000475980	GXL_481456	COL11A1	1301	NC_000001	chr1	-	103466993	103470037	377	5	4.15e-53	1.29e-51	2.53	up	189	71	191	44	17	22	0.14108	0.13359	0.13932	0.03017	0.01598	0.03265	0.138	0.0032	0.02627	0.00734
GXT_24512256	ENSSSCT00000007510	GXL_481456	COL11A1	1301	NC_000001	chr1	-	103343192	103574239	5979	68	0	0	2.5	up	10854	4582	11584	2229	1587	1231	0.74805	0.78595	0.80122	0.14256	0.14092	0.14779	0.77841	0.02235	0.14376	0.00293
GXT_22018608	NM_000094	GXL_382925	COL7A1	1294	NC_000003	chr3	-	48601506	48632593	9143	118	5.35e-119	3.69e-117	1.46	up	3335	1396	3211	1380	983	734	0.1414	0.14448	0.1368	0.0532	0.05463	0.05471	0.14089	0.00316	0.05418	0.00069
GXT_23509316	ENST00000454817	GXL_382925	COL7A1	1294	NC_000003	chr3	-	48601506	48632593	9047	117	5.52e-122	3.89e-120	1.45	up	3293	1376	3170	1369	971	728	0.141	0.14357	0.13638	0.05334	0.05449	0.05476	0.14032	0.00297	0.0542	0.00062
GXT_23509317	ENST00000422991	GXL_382925	COL7A1	1294	NC_000003	chr3	-	48607312	48609059	595	9	3.07e-41	7.83e-40	1.37	up	197	108	192	97	69	50	0.11352	0.1586	0.11234	0.05047	0.05308	0.05203	0.12815	0.02153	0.05186	0.00107
GXT_24416929	ENST00000470076	GXL_382925	COL7A1	1294	NC_000003	chr3	-	48601506	48602425	651	2	6.33e-88	3.16e-86	1.52	up	292	110	285	116	73	63	0.21763	0.20492	0.21191	0.07946	0.06838	0.08311	0.21149	0.0052	0.07698	0.00626
GXT_24416930	ENST00000465238	GXL_382925	COL7A1	1294	NC_000003	chr3	-	48601506	48602452	587	2	2.51e-89	1.27e-87	1.52	up	288	108	283	113	71	63	0.238	0.22308	0.23334	0.08579	0.07367	0.09217	0.23147	0.00623	0.08388	0.00767
GXT_24416931	ENST00000487017	GXL_382925	COL7A1	1294	NC_000003	chr3	-	48601506	48621953	5781	83	1.04e-236	1.69e-234	1.51	up	2185	940	2089	905	600	470	0.13948	0.14646	0.13322	0.0523	0.05021	0.05372	0.13972	0.00541	0.05208	0.00144
GXT_24416932	ENST00000328333	GXL_382925	COL7A1	1294	NC_000003	chr3	-	48601506	48632700	9250	118	1.36e-118	9.32e-117	1.45	up	3342	1399	3217	1383	988	736	0.14014	0.14321	0.13554	0.05273	0.05434	0.05426	0.13963	0.00315	0.05378	0.00074
GXT_24416933	ENST00000466591	GXL_382925	COL7A1	1294	NC_000003	chr3	-	48601507	48602772	778	3	5.05e-73	2.12e-71	1.53	up	360	131	330	134	88	75	0.21927	0.19758	0.19894	0.0742	0.06716	0.08175	0.20526	0.00992	0.07437	0.00596
GXT_24416934	ENST00000474432	GXL_382925	COL7A1	1294	NC_000003	chr3	-	48603973	48604796	728	2	4.86e-57	1.62e-55	1.71	up	157	65	153	51	37	32	0.08521	0.08214	0.08994	0.02695	0.02843	0.03576	0.08576	0.00321	0.03038	0.00385
GXT_24416935	ENST00000459756	GXL_382925	COL7A1	1294	NC_000003	chr3	-	48605131	48607874	792	10	8.19e-97	4.48e-95	1.65	up	296	100	256	94	57	61	0.12932	0.11066	0.11221	0.03723	0.03383	0.04531	0.1174	0.00845	0.03879	0.00481
GXT_24416936	ENST00000467985	GXL_382925	COL7A1	1294	NC_000003	chr3	-	48605597	48608315	683	11	1.73e-41	4.43e-40	1.53	up	227	91	205	79	56	54	0.10734	0.10896	0.09855	0.03229	0.03619	0.04366	0.10495	0.00457	0.03738	0.00472
GXT_24416937	ENST00000462475	GXL_382925	COL7A1	1294	NC_000003	chr3	-	48608327	48608763	305	2	3.93e-11	4.09e-10	1.39	up	69	45	76	39	34	13	0.08479	0.14555	0.09664	0.04492	0.05356	0.02961	0.10899	0.0263	0.0427	0.0099
GXT_22755550	ENST00000295417	GXL_482333	FZD5	7855	NC_000002	chr2	-	208627310	208634287	6708	2	5.33e-143	4.58e-141	2.35	up	568	256	605	144	91	69	0.04184	0.04668	0.04454	0.00974	0.00864	0.00888	0.04435	0.00198	0.00909	0.00047
GXT_22784418	AK315338	GXL_482333	FZD5	7855	NC_000002	chr2	-	208631706	208633722	2017	1	2.92e-117	1.98e-115	2.3	up	253	116	242	67	41	30	0.06195	0.07028	0.05925	0.01505	0.01295	0.01285	0.06383	0.00469	0.01362	0.00101
GXT_22784605	AK290386	GXL_482333	FZD5	7855	NC_000002	chr2	-	208631667	208633597	1931	1	1.24e-127	9.2e-126	2.28	up	240	109	228	66	36	30	0.06162	0.0693	0.05877	0.01561	0.01188	0.01342	0.06323	0.00445	0.01364	0.00153
GXT_2778021	AK024850	GXL_482333	FZD5	7855	NC_000002	chr2	-	208627322	208629784	2463	1	3.87e-59	1.34e-57	2.45	up	155	64	177	35	22	19	0.0312	0.03192	0.03579	0.00649	0.00569	0.00666	0.03297	0.00202	0.00628	0.00042
GXT_2782931	AK000125	GXL_482333	FZD5	7855	NC_000002	chr2	-	208627310	208629075	1766	1	3.87e-32	8.18e-31	2.25	up	95	46	121	25	17	16	0.02667	0.03198	0.03413	0.00646	0.00613	0.00783	0.03093	0.00314	0.00681	0.00074
GXT_2817161	NM_003468	GXL_482333	FZD5	7855	NC_000002	chr2	-	208627310	208634143	6564	2	2.87e-151	2.66e-149	2.34	up	547	245	585	140	89	67	0.04117	0.04564	0.044	0.00967	0.00864	0.00882	0.0436	0.00185	0.00904	0.00045
GXT_22774614	ENST00000374832	GXL_59104	ALPL	249	NC_000001	chr1	+	21877772	21904505	2193	12	2.02e-06	1.5e-05	1.29	up	49	15	40	21	16	8	0.00972	0.0079	0.00818	0.00375	0.00422	0.00315	0.0086	0.0008	0.00371	0.00044
GXT_22774615	ENST00000374830	GXL_59104	ALPL	249	NC_000001	chr1	+	21896796	21904224	733	4	0.000505	0.00255	1.72	up	16	3	14	4	5	1	0.00978	0.00502	0.00859	0.00249	0.00375	0.00118	0.0078	0.00202	0.00247	0.00105
GXT_22790010	AK312667	GXL_59104	ALPL	249	NC_000001	chr1	+	21835919	21904141	1771	12	9.52e-06	6.43e-05	1.25	up	44	10	35	16	16	6	0.01064	0.00555	0.00872	0.00335	0.00504	0.00293	0.0083	0.0021	0.00377	0.00091
GXT_23390228	AK298085	GXL_59104	ALPL	249	NC_000001	chr1	+	21835921	21904668	2131	11	2.98e-07	2.4e-06	1.36	up	47	15	46	19	18	7	0.00954	0.008	0.00982	0.00353	0.00493	0.00284	0.00912	0.0008	0.00377	0.00087
GXT_23390265	AK295608	GXL_59104	ALPL	249	NC_000001	chr1	+	21835919	21904892	2241	10	3.7e-08	3.2e-07	1.45	up	49	17	48	19	17	8	0.00969	0.0087	0.00978	0.00335	0.0044	0.00308	0.00939	0.00049	0.00361	0.00057
GXT_23390302	AK293184	GXL_59104	ALPL	249	NC_000001	chr1	+	21835933	21904295	1870	12	3.31e-05	0.000207	1.18	up	44	12	35	19	16	7	0.01029	0.00657	0.00826	0.00391	0.00477	0.00323	0.00837	0.00152	0.00397	0.00063
GXT_23527211	ENST00000425315	GXL_59104	ALPL	249	NC_000001	chr1	+	21880469	21904902	2442	11	3.68e-09	3.41e-08	1.44	up	54	19	49	22	17	9	0.00975	0.00911	0.00918	0.00355	0.00405	0.00318	0.00935	0.00029	0.00359	0.00036
GXT_23745440	NM_001127501	GXL_59104	ALPL	249	NC_000001	chr1	+	21835858	21904905	2431	11	3.23e-09	3.01e-08	1.45	up	52	18	49	20	18	8	0.00938	0.00853	0.00922	0.00328	0.00432	0.00284	0.00904	0.00037	0.00348	0.00062
GXT_23745766	NM_001177520	GXL_59104	ALPL	249	NC_000001	chr1	+	21835858	21904905	2315	10	1.71e-08	1.51e-07	1.46	up	50	17	48	19	17	8	0.0096	0.00843	0.00947	0.00325	0.00426	0.00298	0.00917	0.00052	0.0035	0.00055
GXT_23749921	XR_024938	GXL_59104	ALPL	249	NC_000001	chr1	+	21835561	21905588	1836	13	5.33e-05	0.000323	1.23	up	38	10	29	14	15	5	0.00874	0.00535	0.00678	0.00274	0.00451	0.00235	0.00696	0.00139	0.0032	0.00094
GXT_24510881	ENSOCUT00000004453	GXL_59104	ALPL	249	NC_000001	chr1	+	21887106	21904139	1536	13	0.000427	0.00219	1.12	up	32	5	25	12	12	4	0.00852	0.004	0.00716	0.00295	0.00456	0.00225	0.00656	0.00189	0.00325	0.00097
GXT_2739368	AK097413	GXL_59104	ALPL	249	NC_000001	chr1	+	21900971	21904892	1595	4	3.57e-06	2.56e-05	1.7	up	25	12	29	9	9	4	0.00729	0.00924	0.00874	0.00258	0.00332	0.00217	0.00842	0.00083	0.00269	0.00048
GXT_2807833	NM_000478	GXL_59104	ALPL	249	NC_000001	chr1	+	21835858	21904905	2596	12	1.8e-09	1.7e-08	1.48	up	57	21	52	22	19	9	0.00974	0.00899	0.00921	0.00334	0.00417	0.00299	0.00931	0.00031	0.0035	0.00049
