# Supplementary material for: PLZF targets developmental enhancers for activation during osteogenic differentiation of human mesenchymal stem cells
Source: eLife. 2019 Jan 23;8:e40364. doi: 10.7554/eLife.40364 (PMC6344081; doi:10.7554/eLife.40364)
Supplement: Figure 4—source data 1. [file elife-40364-fig4-data1.xlsx]

## Sheet: Enhancer binding proteins
	Ex1	Ex2	Ex3	Ex4	Ex1	Ex2	Ex3	Ex4
	Undifferentiated	Undifferentiated	Undifferentiated	Undifferentiated	Differentiated	Differentiated	Differentiated	Differentiated
p300	0.0133	0.018	0.008		0.0268	0.399	0.015
Med1	0.043	0.044	0.0377	0.03	0.075	0.099	0.082	0.09
Med12	0.026	0.04	0.021	0.04	0.18	0.11	0.15	0.18
IgG	0.0047	0.0067	0.0006		0.0023	0.0038	0.0008
