# Supplementary material for: PLZF targets developmental enhancers for activation during osteogenic differentiation of human mesenchymal stem cells
Source: eLife. 2019 Jan 23;8:e40364. doi: 10.7554/eLife.40364 (PMC6344081; doi:10.7554/eLife.40364)
Supplement: Figure 4—source data 2. [file elife-40364-fig4-data2.xlsx]

## Sheet: H3K4me3
	Ex1	Ex2	Ex3		Ex1	Ex2	Ex3
	Undifferentiated	Undifferentiated	Undifferentiated	Undifferentiated	Differentiated	Differentiated	Differentiated	Differentiated
Promoter	0.207519	0.3	0.22		0.833552	2	0.78
TSS	0.860686	1.08	0.75		2.06913	4.01	2
EXON2	0.243944	0.1	0.03		0.368336	0.33	0.29
EnP	0.186068	1.4	0.2		0.577214	3.01	0.7
