# Supplementary material for: PLZF targets developmental enhancers for activation during osteogenic differentiation of human mesenchymal stem cells
Source: eLife. 2019 Jan 23;8:e40364. doi: 10.7554/eLife.40364 (PMC6344081; doi:10.7554/eLife.40364)
Supplement: Figure 4—source data 4. [file elife-40364-fig4-data4.xlsx]

## Sheet: H3K27Ac
	Ex1	Ex2	Ex3		Ex1	Ex2	Ex3
	Undifferentiated	Undifferentiated	Undifferentiated	Undifferentiated	Differentiated	Differentiated	Differentiated	Differentiated
Promoter	0.942893	1.12809	1		1.16078	0.947955	1.2
TSS	0.057773	1.08943	0.99		0.729118	2.834	3.02
EXON2	0.9	0.884374	0.97		1.1	1.09073	1.5
EnP	0.988844	1.40763	1.01895		4.76804	4.23892	3.87401
