# Supplementary material for: PLZF targets developmental enhancers for activation during osteogenic differentiation of human mesenchymal stem cells
Source: eLife. 2019 Jan 23;8:e40364. doi: 10.7554/eLife.40364 (PMC6344081; doi:10.7554/eLife.40364)
Supplement: Figure 4—source data 5. [file elife-40364-fig4-data5.xlsx]

## Sheet: H3K36me3
	Ex1	Ex2	Ex3		Ex1	Ex2	Ex3
	Undifferentiated	Undifferentiated	Undifferentiated	Undifferentiated	Differentiated	Differentiated	Differentiated	Differentiated
Promoter	0.455358	0.23	0.44		0.398344	0.3	0.4
TSS	0.449349	0.56	0.51		0.974408	1.1	0.99
EXON2	0.0360874	0.04	0.034		0.100051	0.2	0.12
EnP	0.527256	1.02	0.55		0.559013	1.21	0.65
