# Supplementary material for: PLZF targets developmental enhancers for activation during osteogenic differentiation of human mesenchymal stem cells
Source: eLife. 2019 Jan 23;8:e40364. doi: 10.7554/eLife.40364 (PMC6344081; doi:10.7554/eLife.40364)
Supplement: Figure 4—source data 6. [file elife-40364-fig4-data6.xlsx]

## Sheet:  Med12-Paired t test data
	Undifferentiated	Differentiated
ex1	0.0026	0.018
ex2	0.004	0.011
ex3	0.0021	0.15
ex4	0.004	0.018
