# Supplementary material for: PLZF targets developmental enhancers for activation during osteogenic differentiation of human mesenchymal stem cells
Source: eLife. 2019 Jan 23;8:e40364. doi: 10.7554/eLife.40364 (PMC6344081; doi:10.7554/eLife.40364)
Supplement: Figure 4—source data 7. [file elife-40364-fig4-data7.xlsx]

## Sheet: Med1-Paired t test data
	Undifferentiated	Differentiated
ex1	0.0043	0.0075
ex2	1e-05	0.003
ex3	0.00207	0.0082
ex4	0.003	0.019
