# Supplementary material for: PLZF targets developmental enhancers for activation during osteogenic differentiation of human mesenchymal stem cells
Source: eLife. 2019 Jan 23;8:e40364. doi: 10.7554/eLife.40364 (PMC6344081; doi:10.7554/eLife.40364)
Supplement: Figure 4—source data 8. [file elife-40364-fig4-data8.xlsx]

## Sheet: reporter integration by GFP QPC
	Ex1	Ex2	Ex3			Ex1	Ex2	Ex3
	Undifferentiated	Undifferentiated	Undifferentiated	Undifferentiated	Undifferentiated	Differentiated	Differentiated	Differentiated	Differentiated	Differentiated
pSINMIN-empty	4038	437	647			4101	492	748
Control element	72.25	295	478			83.4	244.5	395.7
EnP PE1	305.57	560	910			575	445	711
