# Supplementary material for: PLZF targets developmental enhancers for activation during osteogenic differentiation of human mesenchymal stem cells
Source: eLife. 2019 Jan 23;8:e40364. doi: 10.7554/eLife.40364 (PMC6344081; doi:10.7554/eLife.40364)
Supplement: Figure 6—source data 1. [file elife-40364-fig6-data1.xlsx]

## Sheet: NNMT expression
	Ex1	Ex2	Ex3			Ex1	Ex2	Ex3			Ex1	Ex2	Ex3			Ex1	Ex2	Ex3
	Undifferentiated	Undifferentiated	Undifferentiated	Undifferentiated	Undifferentiated	Differentiated 2d	Differentiated 2d	Differentiated 2d	Differentiated 2d	Differentiated 2d	Differentiated 5 days	Differentiated 5 days	Differentiated 5 days	Differentiated 5 days	Differentiated 5 days	Differentiated 10 days	Differentiated 10 days	Differentiated 10 days	Differentiated 10 days	Differentiated 10 days
Control si	0.0013	0.00076	0.000188			0.0016	0.0012	0.000445			0.0019	0.00131	0.000475			0.0023	0.002	0.000694
PLZF kd	0.0009	0.00058	9.3e-05			0.00065	0.00041	0.000119			0.00083	0.00058	0.00014			0.00075	0.00055	0.000283
NNMT kd	8.8e-05	0.00019				5.4e-05	4.2e-05				0.00011	0.00013				0.00019	0.00023
