# Supplementary material for: PLZF targets developmental enhancers for activation during osteogenic differentiation of human mesenchymal stem cells
Source: eLife. 2019 Jan 23;8:e40364. doi: 10.7554/eLife.40364 (PMC6344081; doi:10.7554/eLife.40364)
Supplement: Figure 6—source data 2. [file elife-40364-fig6-data2.xlsx]

## Sheet: ALPL expression with NNMtkd
	Ex1	Ex2				Ex1	Ex2				Ex1	Ex2
	Undifferentiated	Undifferentiated	Undifferentiated	Undifferentiated	Undifferentiated	Differentiated 2d	Differentiated 2d	Differentiated 2d	Differentiated 2d	Differentiated 2d	Differentiated 5 days	Differentiated 5 days	Differentiated 5 days	Differentiated 5 days	Differentiated 5 days	Differentiated 10 days	Differentiated 10 days	Differentiated 10 days	Differentiated 10 days	Differentiated 10 days
Control si	0.000244	0.000199				0.000372	0.00034				0.00177	0.0015
PLZF kd	0.00084	0.000791				0.000562	0.0005				0.00324	0.003
NNMT kd	0.000384	0.000399				0.00023	0.000255				0.000381	0.0004
