# Supplementary material for: PLZF targets developmental enhancers for activation during osteogenic differentiation of human mesenchymal stem cells
Source: eLife. 2019 Jan 23;8:e40364. doi: 10.7554/eLife.40364 (PMC6344081; doi:10.7554/eLife.40364)
Supplement: Figure 7—source data 1. [file elife-40364-fig7-data1.xlsx]

## Sheet: PLZFkd Enhancer binding protein
	Ex1	Ex2			Ex1	Ex2			Ex1	Ex2			Ex1	Ex2
	Undifferentiated controlSi	Undifferentiated controlSi	Undifferentiated controlSi	Undifferentiated controlSi	Differentiated Control Si	Differentiated Control Si	Differentiated Control Si	Differentiated Control Si	Undifferentiated PLZFSi	Undifferentiated PLZFSi	Undifferentiated PLZFSi	Undifferentiated PLZFSi	Differentiated PLZF Si	Differentiated PLZF Si	Differentiated PLZF Si	Differentiated PLZF Si
Med12	0.0026	0.0031			0.0189	0.021			0.00178	0.0019			0.0548	0.055
POL2	0.00156	0.00167			0.00195	0.00198			0.00121	0.0014			0.0051	0.0055
IgG	0.0003	0.00032			0.00089	0.00089			0.0001	0.00012			0.00025	0.00028
