# Supplementary material for: PLZF targets developmental enhancers for activation during osteogenic differentiation of human mesenchymal stem cells
Source: eLife. 2019 Jan 23;8:e40364. doi: 10.7554/eLife.40364 (PMC6344081; doi:10.7554/eLife.40364)
Supplement: Supplementary file 1. [file elife-40364-supp1.xlsx]

## Sheet: Genes-differentially-regulated
Probe set	Symbol	Gene title	Fold change day 2/day0	Fold change day 5/day0	Fold change day 10/day0
214456_PM_x_at	SAA1 /// SAA2	serum amyloid A1 /// serum amyloid A2	128.161	256.896	256.54
225987_PM_at	STEAP4	STEAP family member 4	8.99044	190.826	191.582
207092_PM_at	LEP	leptin	51.4237	98.4663	237.88
228854_PM_at	---	---	62.2989	87.8864	119.352
205907_PM_s_at	OMD	osteomodulin	23.9982	86.0106	196.983
209170_PM_s_at	GPM6B	glycoprotein M6B	25.4552	84.4994	230.634
209167_PM_at	GPM6B	glycoprotein M6B	25.672	82.7419	207.577
213948_PM_x_at		cell adhesion molecule 3	8.63809	74.4679	211.557
220356_PM_at	CORIN	corin, serine peptidase	21.9643	67.7656	153.337
208607_PM_s_at	SAA1 /// SAA2	serum amyloid A1 /// serum amyloid A2	26.6069	65.2981	63.1168
203698_PM_s_at	FRZB	frizzled-related protein	34.6097	59.1805	99.9469
224856_PM_at	FKBP5	FK506 binding protein 5	42.3914	58.0595	64.3334
206100_PM_at	CPM	carboxypeptidase M	70.8026	53.9792	54.7112
203697_PM_at	FRZB	frizzled-related protein	35.5932	53.6112	87.9592
239260_PM_at	CORIN	corin, serine peptidase	19.854	45.5396	88.6097
205908_PM_s_at	OMD	osteomodulin	9.10083	43.134	108.539
212741_PM_at	MAOA	monoamine oxidase A	20.0301	42.5569	44.5282
239261_PM_s_at	CORIN	corin, serine peptidase	19.1464	42.3392	89.3331
213068_PM_at	DPT	dermatopontin	2.28024	38.5549	218.524
218723_PM_s_at	C13orf15	chromosome 13 open reading frame 15	40.2485	38.2226	89.4049
224840_PM_at	FKBP5	FK506 binding protein 5	27.3467	36.5369	42.5796
211355_PM_x_at	LEPR	leptin receptor	24.7336	35.6415	49.4829
213075_PM_at	OLFML2A	olfactomedin-like 2A	12.6423	34.2259	83.0141
219478_PM_at	WFDC1	WAP four-disulfide core domain 1	18.0099	33.1132	16.089
211356_PM_x_at	LEPR	leptin receptor	23.7915	32.7659	45.8532
235019_PM_at	CPM	carboxypeptidase M	44.9431	32.0729	32.1638
227762_PM_at	---	---	22.0101	30.2196	40.8823
202410_PM_x_at	IGF2 /// INS-IGF2	insulin-like growth factor 2 (somatomedin A) /// INS-IGF2 readthrough transcript	19.2204	29.5284	38.125
202409_PM_at	IGF2 /// INS-IGF2	insulin-like growth factor 2 (somatomedin A) /// INS-IGF2 readthrough transcript	20.783	29.0594	36.2031
205382_PM_s_at	CFD	complement factor D (adipsin)	7.27466	27.8201	65.8428
235751_PM_s_at	VMO1	vitelline membrane outer layer 1 homolog (chicken)	8.45568	26.4416	17.2224
204388_PM_s_at	MAOA	monoamine oxidase A	7.9294	26.2402	25.1699
211354_PM_s_at	LEPR	leptin receptor	16.9594	25.94	30.8
235182_PM_at	ISM1	isthmin 1 homolog (zebrafish)	5.45647	25.5127	53.6799
205108_PM_s_at	APOB	apolipoprotein B (including Ag(x) antigen)	12.5155	25.1643	32.3089
205883_PM_at	ZBTB16	zinc finger and BTB domain containing 16	18.4301	25.0996	35.8817
235706_PM_at	CPM	carboxypeptidase M	37.91	23.546	25.2914
209168_PM_at	GPM6B	glycoprotein M6B	5.45106	23.3687	68.8764
227006_PM_at	PPP1R14A	protein phosphatase 1, regulatory (inhibitor) subunit 14A	26.5897	22.3913	15.0412
229302_PM_at	TMEM178	transmembrane protein 178	3.25794	22.2971	43.2581
209612_PM_s_at	ADH1B	alcohol dehydrogenase 1B (class I), beta polypeptide	9.87884	21.1382	43.7522
210881_PM_s_at	IGF2 /// INS-IGF2	insulin-like growth factor 2 (somatomedin A) /// INS-IGF2 readthrough transcript	14.4795	21.0545	29.114
204470_PM_at	CXCL1	chemokine (C-X-C motif) ligand 1 (melanoma growth stimulating activity, alpha)	2.26366	20.6557	16.4833
207977_PM_s_at	DPT	dermatopontin	1.65017	20.4647	118.377
203021_PM_at	SLPI	secretory leukocyte peptidase inhibitor	5.76042	20.0062	36.2252
222253_PM_s_at	POM121L9P	POM121 membrane glycoprotein-like 9 (rat) pseudogene	9.56285	19.8577	21.2463
206243_PM_at	TIMP4	TIMP metallopeptidase inhibitor 4	7.81033	19.8548	38.0272
1556185_PM_a_at	---	---	1.3602	18.339	18.5379
217767_PM_at	C3	complement component 3	3.38622	17.9575	25.3866
206407_PM_s_at	CCL13	chemokine (C-C motif) ligand 13	1.08624	17.8242	23.8315
209613_PM_s_at	ADH1B	alcohol dehydrogenase 1B (class I), beta polypeptide	7.97544	17.6958	46.4164
224646_PM_x_at	H19	H19, imprinted maternally expressed transcript (non-protein coding)	6.8482	17.6265	16.0917
1556997_PM_a_at	---	---	8.42366	17.1885	19.6006
206176_PM_at	BMP6	bone morphogenetic protein 6	49.2693	17.1685	13.0746
204223_PM_at	PRELP	proline/arginine-rich end leucine-rich repeat protein	8.4428	16.1781	60.4161
219087_PM_at	ASPN	asporin	0.745852	15.7483	92.8812
202724_PM_s_at	FOXO1	forkhead box O1	8.59853	15.72	26.6399
203184_PM_at	FBN2	fibrillin 2	8.25761	15.7013	12.9705
224397_PM_s_at	TMTC1	transmembrane and tetratricopeptide repeat containing 1	10.2067	15.5949	16.1275
228224_PM_at	PRELP	proline/arginine-rich end leucine-rich repeat protein	7.30688	15.0141	59.4369
205226_PM_at	PDGFRL	platelet-derived growth factor receptor-like	2.58319	14.5828	26.1114
219230_PM_at	TMEM100	transmembrane protein 100	2.01401	13.9849	20.1469
206002_PM_at	GPR64	G protein-coupled receptor 64	5.029	13.9437	13.6291
209894_PM_at	LEPR	leptin receptor	10.1798	13.6071	15.172
226322_PM_at	TMTC1	transmembrane and tetratricopeptide repeat containing 1	9.28443	13.6034	19.0762
220786_PM_s_at	SLC38A4	solute carrier family 38, member 4	9.73175	13.4772	24.8692
230463_PM_at	---	---	3.85402	12.577	20.5927
205609_PM_at	ANGPT1	angiopoietin 1	7.18119	12.4937	15.872
213348_PM_at	CDKN1C	cyclin-dependent kinase inhibitor 1C (p57, Kip2)	10.3386	12.4812	11.9334
226931_PM_at	TMTC1	transmembrane and tetratricopeptide repeat containing 1	10.7088	12.3537	19.9925
202723_PM_s_at	FOXO1	forkhead box O1	7.79704	12.2213	20.5291
219304_PM_s_at	PDGFD	platelet derived growth factor D	11.5697	11.9739	18.6068
234987_PM_at	---	---	5.40617	11.9577	24.0125
227480_PM_at	SUSD2	sushi domain containing 2	4.39756	11.9513	14.6249
209301_PM_at	CA2	carbonic anhydrase II	1.64346	11.9479	4.76403
235529_PM_x_at	---	---	4.52582	11.771	20.3524
204502_PM_at	SAMHD1	SAM domain and HD domain 1	5.36448	11.7346	19.7824
235964_PM_x_at	---	---	4.76779	11.6795	19.1868
205713_PM_s_at	COMP	cartilage oligomeric matrix protein	5.63248	11.5928	19.3438
205608_PM_s_at	ANGPT1	angiopoietin 1	7.73833	11.4653	15.6579
207761_PM_s_at	METTL7A	methyltransferase like 7A	5.66286	11.2851	17.8079
204867_PM_at	GCHFR	GTP cyclohydrolase I feedback regulator	14.2157	11.135	21.2267
209436_PM_at	SPON1	spondin 1, extracellular matrix protein	1.77541	10.8534	25.8559
206496_PM_at	FMO3	flavin containing monooxygenase 3	5.66577	10.7527	24.3919
228176_PM_at	S1PR3	sphingosine-1-phosphate receptor 3	3.62861	10.6023	10.7297
229271_PM_x_at	COL11A1	collagen, type XI, alpha 1	6.63844	10.2524	14.009
227307_PM_at	TSPAN18	Tetraspanin 18	5.53623	10.2008	13.642
209169_PM_at	GPM6B	glycoprotein M6B	2.19717	10.1013	31.2783
40665_PM_at	FMO3	flavin containing monooxygenase 3	5.38511	10.0837	23.8852
1559883_PM_s_at	SAMHD1	SAM domain and HD domain 1	4.59543	9.93137	21.1611
204389_PM_at	MAOA	monoamine oxidase A	3.72974	9.74091	10.2245
220180_PM_at	CCDC68	coiled-coil domain containing 68	6.70706	9.58008	28.7628
236936_PM_at	---	---	4.42426	9.3966	12.851
236361_PM_at	GALNTL2	UDP-N-acetyl-alpha-D-galactosamine:polypeptide N-acetylgalactosaminyltransferase-like 2	7.25865	9.21771	7.70032
203126_PM_at	IMPA2	inositol(myo)-1(or 4)-monophosphatase 2	10.3115	9.20179	5.7554
201427_PM_s_at	SEPP1	selenoprotein P, plasma, 1	5.59611	8.94683	21.9453
206819_PM_at	POM121L9P	POM121 membrane glycoprotein-like 9 (rat) pseudogene	3.99409	8.93906	9.83847
226955_PM_at	AFAP1L1	actin filament associated protein 1-like 1	2.45907	8.89078	23.0124
208510_PM_s_at	PPARG	peroxisome proliferator-activated receptor gamma	4.37958	8.80262	12.4741
203921_PM_at	CHST2	carbohydrate (N-acetylglucosamine-6-O) sulfotransferase 2	6.52244	8.80048	8.89926
211597_PM_s_at	HOPX	HOP homeobox	5.40379	8.75925	28.9875
226047_PM_at	MRVI1	murine retrovirus integration site 1 homolog	8.58595	8.60565	7.29045
231929_PM_at	IKZF2	IKAROS family zinc finger 2 (Helios)	12.7006	8.49354	3.65002
205582_PM_s_at	GGT5	gamma-glutamyltransferase 5	4.57263	8.47813	13.4432
204560_PM_at	FKBP5	FK506 binding protein 5	7.6883	8.21049	8.73129
209189_PM_at	FOS	FBJ murine osteosarcoma viral oncogene homolog	5.46314	8.168	9.32638
228057_PM_at	DDIT4L	DNA-damage-inducible transcript 4-like	1.20296	8.1646	5.12034
205083_PM_at	AOX1	aldehyde oxidase 1	6.26052	8.04718	10.0713
205082_PM_s_at	AOX1	aldehyde oxidase 1	5.22182	8.03952	10.2432
215813_PM_s_at	PTGS1	prostaglandin-endoperoxide synthase 1 (prostaglandin G/H synthase and cyclooxygenase)	2.4134	8.03323	22.2866
202388_PM_at	RGS2	regulator of G-protein signaling 2, 24kDa	2.43699	7.98523	5.95092
204457_PM_s_at	GAS1	growth arrest-specific 1	4.96262	7.88393	6.84376
230214_PM_at	MRVI1	murine retrovirus integration site 1 homolog	9.52698	7.79431	6.12862
202035_PM_s_at	SFRP1	secreted frizzled-related protein 1	4.66787	7.75737	13.3697
202037_PM_s_at	SFRP1	secreted frizzled-related protein 1	5.4432	7.71546	11.1211
206631_PM_at	PTGER2	prostaglandin E receptor 2 (subtype EP2), 53kDa	6.97127	7.69987	11.624
228501_PM_at	GALNTL2	UDP-N-acetyl-alpha-D-galactosamine:polypeptide N-acetylgalactosaminyltransferase-like 2	5.58901	7.6058	6.10696
213994_PM_s_at	SPON1	spondin 1, extracellular matrix protein	1.12157	7.43661	13.6934
205128_PM_x_at	PTGS1	prostaglandin-endoperoxide synthase 1 (prostaglandin G/H synthase and cyclooxygenase)	2.47234	7.359	21.0808
201787_PM_at	FBLN1	fibulin 1	3.10102	7.34102	12.6771
227758_PM_at	RERG	RAS-like, estrogen-regulated, growth inhibitor	1.79631	7.31172	19.2898
221796_PM_at	NTRK2	neurotrophic tyrosine kinase, receptor, type 2	1.27292	7.24466	43.0666
208470_PM_s_at	HP /// HPR	haptoglobin /// haptoglobin-related protein	1.32576	7.22094	29.9221
232736_PM_s_at	POM121L8P /// POM121L9P	POM121 membrane glycoprotein-like 8 (rat) pseudogene /// POM121 membrane glycoprotein-like 9 (rat) pseudogene	3.51824	7.20735	7.98325
229623_PM_at	FLJ12993	Hypothetical LOC441027	3.41334	7.04553	7.41231
1556114_PM_a_at	DKFZp451A211	DKFZp451A211 protein	7.08484	7.01102	7.1698
211006_PM_s_at	KCNB1	potassium voltage-gated channel, Shab-related subfamily, member 1	18.5981	6.9618	6.49548
209343_PM_at	EFHD1	EF-hand domain family, member D1	9.11079	6.95283	11.7941
228819_PM_at	TSPAN18	tetraspanin 18	4.64486	6.89811	8.77917
207255_PM_at	LEPR	leptin receptor	5.03415	6.88039	6.63564
214587_PM_at	COL8A1	collagen, type VIII, alpha 1	5.40794	6.83035	6.91521
238919_PM_at	---	---	9.01501	6.74384	11.2972
203435_PM_s_at	MME	membrane metallo-endopeptidase	1.77863	6.63048	10.8914
219398_PM_at	CIDEC	cell death-inducing DFFA-like effector c	1.97559	6.59153	11.982
204897_PM_at	PTGER4	prostaglandin E receptor 4 (subtype EP4)	4.0735	6.58457	10.8345
229011_PM_at	---	---	3.74257	6.53607	11.9727
223467_PM_at	RASD1	RAS, dexamethasone-induced 1	2.38266	6.51019	4.07516
213247_PM_at	SVEP1	sushi, von Willebrand factor type A, EGF and pentraxin domain containing 1	4.26824	6.47522	9.4611
208335_PM_s_at	DARC	Duffy blood group, chemokine receptor	1.24665	6.47493	13.8302
201525_PM_at	APOD	apolipoprotein D	1.70281	6.4255	69.9264
238178_PM_at	---	---	2.89887	6.39227	3.71195
209074_PM_s_at	FAM107A	family with sequence similarity 107, member A	2.39936	6.34204	9.23693
212886_PM_at	CCDC69	coiled-coil domain containing 69	2.86866	6.27079	4.91997
213895_PM_at	EMP1	epithelial membrane protein 1	3.46495	6.22057	13.5665
210729_PM_at	NPY2R	neuropeptide Y receptor Y2	1.9757	6.20362	15.3494
230958_PM_s_at	---	---	4.71361	6.08721	6.76674
212558_PM_at	SPRY1	sprouty homolog 1, antagonist of FGF signaling (Drosophila)	5.21329	6.03485	17.6434
228653_PM_at	SAMD5	sterile alpha motif domain containing 5	3.52273	6.02223	8.09688
225177_PM_at	RAB11FIP1	RAB11 family interacting protein 1 (class I)	5.65026	6.00676	4.64495
223402_PM_at	DUSP23	dual specificity phosphatase 23	5.04222	6.00398	5.85413
231798_PM_at	NOG	noggin	4.29877	5.98045	5.64574
244745_PM_at	RERG	RAS-like, estrogen-regulated, growth inhibitor	1.84772	5.94462	15.6217
213071_PM_at	DPT	dermatopontin	1.18746	5.92796	52.4038
219737_PM_s_at	PCDH9	protocadherin 9	6.68662	5.86493	10.0628
244419_PM_at	FRZB	Frizzled-related protein	2.99968	5.80754	11.1847
239638_PM_at	---	---	3.52065	5.78829	11.2223
37892_PM_at	COL11A1	collagen, type XI, alpha 1	3.81845	5.76599	7.05629
204320_PM_at	COL11A1	collagen, type XI, alpha 1	3.69248	5.75409	7.08813
207177_PM_at	PTGFR	prostaglandin F receptor (FP)	0.557919	5.73434	16.4879
212239_PM_at	PIK3R1	phosphoinositide-3-kinase, regulatory subunit 1 (alpha)	2.81929	5.71558	6.10355
202376_PM_at	SERPINA3	serpin peptidase inhibitor, clade A (alpha-1 antiproteinase, antitrypsin), member 3	0.976242	5.71465	13.9252
202859_PM_x_at	IL8	interleukin 8	3.82657	5.69332	13.9063
239273_PM_s_at	MMP28	matrix metallopeptidase 28	1.75915	5.67159	4.07928
212240_PM_s_at	PIK3R1	phosphoinositide-3-kinase, regulatory subunit 1 (alpha)	2.75971	5.6161	6.49141
205500_PM_at	C5	complement component 5	2.53328	5.61386	3.50669
203434_PM_s_at	MME	membrane metallo-endopeptidase	1.64322	5.60205	8.19456
221245_PM_s_at	FZD5	frizzled homolog 5 (Drosophila)	7.89041	5.54907	3.21391
242002_PM_at	NKAIN2	Na+/K+ transporting ATPase interacting 2	2.4255	5.50877	13.9825
229518_PM_at	FAM46B	family with sequence similarity 46, member B	4.09436	5.50088	4.57594
206315_PM_at	CRLF1	cytokine receptor-like factor 1	2.04819	5.49134	11.543
236300_PM_at	---	---	3.0536	5.43962	3.79164
226806_PM_s_at	NFIA	nuclear factor I/A	3.6773	5.42136	6.51745
228325_PM_at	KIAA0146	KIAA0146	4.2507	5.39498	3.02218
203000_PM_at	STMN2	stathmin-like 2	1.17435	5.39106	20.4935
228910_PM_at	---	---	2.8404	5.34994	7.53898
215119_PM_at	MYO16	myosin XVI	2.9461	5.34154	10.1911
232458_PM_at	COL3A1	Collagen, type III, alpha 1	1.4718	5.31174	5.88104
238463_PM_at	---	---	2.31086	5.31072	7.18795
202861_PM_at	PER1	period homolog 1 (Drosophila)	4.55866	5.22466	5.63765
231773_PM_at	ANGPTL1	angiopoietin-like 1	1.54764	5.19545	4.19015
227862_PM_at	TRNP1	TMF1-regulated nuclear protein 1	3.73367	5.16856	5.6875
204491_PM_at	PDE4D	phosphodiesterase 4D, cAMP-specific (phosphodiesterase E3 dunce homolog, Drosophila)	1.68207	5.14539	3.19751
213006_PM_at	CEBPD	CCAAT/enhancer binding protein (C/EBP), delta	4.05173	5.12365	2.83647
216894_PM_x_at	CDKN1C	cyclin-dependent kinase inhibitor 1C (p57, Kip2)	4.79098	5.11132	4.64181
209505_PM_at	NR2F1	Nuclear receptor subfamily 2, group F, member 1	4.1731	5.10021	8.79361
242605_PM_at	---	---	4.07428	5.09597	3.16552
224901_PM_at	SCD5	stearoyl-CoA desaturase 5	3.83694	5.09107	5.51294
202995_PM_s_at	FBLN1	fibulin 1	2.51368	5.0761	8.44197
217546_PM_at	MT1M	metallothionein 1M	2.53975	5.05053	4.03118
226055_PM_at	ARRDC2	arrestin domain containing 2	4.32106	5.04012	11.9947
204718_PM_at	EPHB6	EPH receptor B6	1.47457	4.96793	10.9366
1555097_PM_a_at	PTGFR	prostaglandin F receptor (FP)	0.796713	4.96149	15.1779
231262_PM_at	---	---	2.84175	4.9607	5.92429
219790_PM_s_at	NPR3	natriuretic peptide receptor C/guanylate cyclase C (atrionatriuretic peptide receptor C)	4.96001	4.9517	3.61921
227948_PM_at	FGD4	FYVE, RhoGEF and PH domain containing 4	12.4559	4.94188	5.39459
204040_PM_at	RNF144A	ring finger protein 144A	0.998448	4.91595	7.24532
219789_PM_at	NPR3	natriuretic peptide receptor C/guanylate cyclase C (atrionatriuretic peptide receptor C)	5.0126	4.84686	3.42308
208998_PM_at	UCP2	uncoupling protein 2 (mitochondrial, proton carrier)	2.47646	4.84175	2.81578
204187_PM_at	GMPR	guanosine monophosphate reductase	3.4242	4.82534	5.91979
241765_PM_at	CPM	carboxypeptidase M	7.34594	4.82392	5.19087
36829_PM_at	PER1	period homolog 1 (Drosophila)	3.97606	4.82305	4.7747
222860_PM_s_at	PDGFD	platelet derived growth factor D	5.91954	4.80506	8.58236
202994_PM_s_at	FBLN1	fibulin 1	2.3084	4.80203	7.50571
202286_PM_s_at	TACSTD2	tumor-associated calcium signal transducer 2	1.22584	4.80079	14.6519
206091_PM_at	MATN3	matrilin 3	3.04032	4.78167	5.26191
205818_PM_at	DBC1	deleted in bladder cancer 1	1.76798	4.75287	5.946
1553102_PM_a_at	CCDC69	coiled-coil domain containing 69	2.27989	4.75268	3.90329
211677_PM_x_at	CADM3	cell adhesion molecule 3	1.57357	4.74625	13.7899
204035_PM_at	SCG2	secretogranin II (chromogranin C)	0.619979	4.74586	12.5225
219738_PM_s_at	PCDH9	protocadherin 9	3.40822	4.73877	7.81156
204720_PM_s_at	DNAJC6	DnaJ (Hsp40) homolog, subfamily C, member 6	5.11192	4.73805	4.04544
203453_PM_at	SCNN1A	sodium channel, nonvoltage-gated 1 alpha	2.50637	4.7309	3.22519
213413_PM_at	STON1	stonin 1	3.45663	4.7265	6.98175
207001_PM_x_at	TSC22D3	TSC22 domain family, member 3	2.63286	4.70512	9.41224
222722_PM_at	OGN	osteoglycin	1.24892	4.70142	18.3902
214022_PM_s_at	IFITM1	interferon induced transmembrane protein 1 (9-27)	1.43734	4.66677	7.61411
219534_PM_x_at	CDKN1C	cyclin-dependent kinase inhibitor 1C (p57, Kip2)	4.57251	4.66555	4.27096
233109_PM_at	COL12A1	Collagen, type XII, alpha 1	2.35478	4.64964	6.10958
212249_PM_at	PIK3R1	phosphoinositide-3-kinase, regulatory subunit 1 (alpha)	2.15201	4.63877	4.48495
240869_PM_at	---	---	6.85714	4.63664	4.52825
206766_PM_at	ITGA10	integrin, alpha 10	5.19789	4.60826	8.62596
241450_PM_at	RSPO1	R-spondin homolog (Xenopus laevis)	2.37726	4.57822	11.1265
214433_PM_s_at	SELENBP1	selenium binding protein 1	2.2747	4.56197	4.23534
232805_PM_at	---	---	2.47255	4.55087	10.5163
205782_PM_at	FGF7	fibroblast growth factor 7 (keratinocyte growth factor)	3.38225	4.53798	5.37522
224339_PM_s_at	ANGPTL1	angiopoietin-like 1	1.49207	4.53194	3.49935
219054_PM_at	C5orf23	chromosome 5 open reading frame 23	4.34574	4.52809	3.78964
227032_PM_at	PLXNA2	plexin A2	5.92167	4.51623	6.00814
1564796_PM_at	EMP1	epithelial membrane protein 1	2.45905	4.51465	7.07018
214581_PM_x_at	TNFRSF21	tumor necrosis factor receptor superfamily, member 21	2.84985	4.51459	4.37387
235122_PM_at	HIVEP3	human immunodeficiency virus type I enhancer binding protein 3	4.39845	4.49104	2.48553
202761_PM_s_at	SYNE2	spectrin repeat containing, nuclear envelope 2	4.68128	4.45121	4.01793
201044_PM_x_at	DUSP1	dual specificity phosphatase 1	6.34065	4.39853	5.19933
202036_PM_s_at	SFRP1	secreted frizzled-related protein 1	4.81896	4.37925	4.53946
243879_PM_at	---	---	1.49915	4.3767	9.04748
206756_PM_at	CHST7	carbohydrate (N-acetylglucosamine 6-O) sulfotransferase 7	3.0231	4.37342	3.42109
226731_PM_at	PELO	Pelota homolog (Drosophila)	4.02261	4.3644	3.66209
219681_PM_s_at	RAB11FIP1	RAB11 family interacting protein 1 (class I)	5.33466	4.35351	2.84985
227899_PM_at	VIT	vitrin	1.6773	4.35244	14.7959
225516_PM_at	SLC7A2	solute carrier family 7 (cationic amino acid transporter, y+ system), member 2	1.36749	4.32738	10.0077
231031_PM_at	KGFLP2	keratinocyte growth factor-like protein 2	2.81496	4.30478	4.73928
204154_PM_at	CDO1	cysteine dioxygenase, type I	1.11603	4.25183	6.99607
223468_PM_s_at	RGMA	RGM domain family, member A	1.84742	4.23981	3.75278
241560_PM_at	---	---	0.818057	4.23399	3.39644
224997_PM_x_at	H19	H19, imprinted maternally expressed transcript (non-protein coding)	1.59153	4.22842	3.26059
224976_PM_at	NFIA	nuclear factor I/A	3.44227	4.22154	3.519
226814_PM_at	ADAMTS9	ADAM metallopeptidase with thrombospondin type 1 motif, 9	3.63097	4.20703	1.89901
228962_PM_at	PDE4D	phosphodiesterase 4D, cAMP-specific (phosphodiesterase E3 dunce homolog, Drosophila)	1.61893	4.20003	2.30944
224975_PM_at	NFIA	nuclear factor I/A	3.23919	4.19343	4.41411
224396_PM_s_at	ASPN	asporin	0.783774	4.18816	45.0996
224550_PM_s_at	MRVI1	murine retrovirus integration site 1 homolog	6.25629	4.15547	3.53687
228461_PM_at	SH3RF3	SH3 domain containing ring finger 3	2.80544	4.15365	4.54165
239272_PM_at	MMP28	matrix metallopeptidase 28	2.12795	4.1367	3.81469
204456_PM_s_at	GAS1	growth arrest-specific 1	1.98786	4.12948	2.66038
220639_PM_at	TM4SF20	transmembrane 4 L six family member 20	1.90113	4.05432	1.53998
219443_PM_at	TASP1	taspase, threonine aspartase, 1	2.01014	4.03916	2.3557
222513_PM_s_at	SORBS1	sorbin and SH3 domain containing 1	4.44146	4.03057	4.62
203407_PM_at	PPL	periplakin	1.1312	4.0219	11.5725
202718_PM_at	IGFBP2	insulin-like growth factor binding protein 2, 36kDa	3.73786	4.00628	8.17064
211317_PM_s_at	CFLAR	CASP8 and FADD-like apoptosis regulator	3.41257	3.98576	3.85447
215306_PM_at	---	---	2.82666	3.97545	7.61181
202291_PM_s_at	MGP	matrix Gla protein	0.945016	3.96824	21.7151
231015_PM_at	KLF15	Kruppel-like factor 15	2.65309	3.96681	8.02574
204041_PM_at	MAOB	monoamine oxidase B	2.08405	3.96371	4.54974
242657_PM_at	---	---	2.47077	3.96137	3.634
204439_PM_at	IFI44L	interferon-induced protein 44-like	1.20069	3.95991	3.97978
221921_PM_s_at	CADM3	cell adhesion molecule 3	1.28124	3.95056	15.8142
227095_PM_at	---	---	2.55015	3.89556	4.86151
231698_PM_at	FLJ36848	hypothetical LOC647115	2.62078	3.89496	4.13683
218856_PM_at	TNFRSF21	tumor necrosis factor receptor superfamily, member 21	2.59881	3.87406	4.18082
238121_PM_at	GK5	glycerol kinase 5 (putative)	3.25657	3.84475	3.08718
225123_PM_at	---	---	2.41087	3.82394	4.54055
228507_PM_at	---	---	2.53829	3.81649	2.75812
223454_PM_at	CXCL16	chemokine (C-X-C motif) ligand 16	2.53035	3.81108	3.30896
223333_PM_s_at	ANGPTL4	angiopoietin-like 4	3.08157	3.80914	10.2998
226192_PM_at	---	---	3.16184	3.80468	7.5892
212978_PM_at	LRRC8B	leucine rich repeat containing 8 family, member B	1.47036	3.79646	4.11329
210875_PM_s_at	ZEB1	zinc finger E-box binding homeobox 1	2.5705	3.78761	4.90221
218589_PM_at	LPAR6	lysophosphatidic acid receptor 6	2.20187	3.74301	5.28241
234989_PM_at	NEAT1	nuclear paraspeckle assembly transcript 1 (non-protein coding)	2.02487	3.74193	4.23813
200884_PM_at	CKB	creatine kinase, brain	3.42507	3.72912	2.66172
228716_PM_at	THRB	thyroid hormone receptor, beta (erythroblastic leukemia viral (v-erb-a) oncogene homolog 2, avian)	2.44429	3.72858	19.6629
208070_PM_s_at	REV3L	REV3-like, catalytic subunit of DNA polymerase zeta (yeast)	1.92486	3.69898	3.05311
218309_PM_at	CAMK2N1	calcium/calmodulin-dependent protein kinase II inhibitor 1	5.2088	3.69626	7.18685
212543_PM_at	AIM1	absent in melanoma 1	1.78264	3.67966	5.23377
209506_PM_s_at	NR2F1	nuclear receptor subfamily 2, group F, member 1	4.05057	3.65281	6.58734
213030_PM_s_at	PLXNA2	plexin A2	5.43919	3.64489	5.2044
201295_PM_s_at	WSB1	WD repeat and SOCS box-containing 1	1.39476	3.64088	4.89688
203865_PM_s_at	ADARB1	adenosine deaminase, RNA-specific, B1 (RED1 homolog rat)	3.96901	3.64063	3.75306
206336_PM_at	CXCL6	chemokine (C-X-C motif) ligand 6 (granulocyte chemotactic protein 2)	0.864802	3.60931	2.29731
235427_PM_at	---	---	3.57448	3.58758	4.13672
203001_PM_s_at	STMN2	stathmin-like 2	1.09552	3.58081	14.0461
227620_PM_at	SLC44A1	solute carrier family 44, member 1	3.20199	3.57129	5.35606
205698_PM_s_at	MAP2K6	mitogen-activated protein kinase kinase 6	1.19102	3.56731	4.26933
213182_PM_x_at	CDKN1C	cyclin-dependent kinase inhibitor 1C (p57, Kip2)	3.62735	3.56591	3.22348
217757_PM_at	A2M	alpha-2-macroglobulin	1.63723	3.55895	6.56231
212573_PM_at	ENDOD1	endonuclease domain containing 1	3.30693	3.55224	3.42521
204719_PM_at	ABCA8	ATP-binding cassette, sub-family A (ABC1), member 8	3.30437	3.55097	3.3937
1559965_PM_at	LOC100192378	hypothetical LOC100192378	3.32858	3.54507	4.36687
212570_PM_at	ENDOD1	endonuclease domain containing 1	4.28594	3.52346	3.77833
212713_PM_at	MFAP4	microfibrillar-associated protein 4	1.37274	3.5066	9.43378
214660_PM_at	PELO	Pelota homolog (Drosophila)	3.46277	3.49622	2.18608
1555103_PM_s_at	FGF7	fibroblast growth factor 7 (keratinocyte growth factor)	2.02772	3.49572	3.02073
227188_PM_at	C21orf63	chromosome 21 open reading frame 63	2.86332	3.47662	3.35956
227827_PM_at	---	---	2.72832	3.47547	3.70024
218087_PM_s_at	SORBS1	sorbin and SH3 domain containing 1	2.64443	3.4746	3.63214
214608_PM_s_at	EYA1	eyes absent homolog 1 (Drosophila)	1.19504	3.46818	4.22951
226197_PM_at	---	---	2.36926	3.46672	5.97288
202948_PM_at	IL1R1	interleukin 1 receptor, type I	1.55691	3.46668	3.77172
1559966_PM_a_at	LOC100192378	hypothetical LOC100192378	3.01368	3.46311	4.01227
236035_PM_at	---	---	1.79421	3.46076	5.68782
221572_PM_s_at	SLC26A6	solute carrier family 26, member 6	2.57854	3.4328	4.96327
205116_PM_at	LAMA2	laminin, alpha 2	1.66871	3.42575	8.95263
213519_PM_s_at	LAMA2	laminin, alpha 2	1.65003	3.4183	9.68879
239952_PM_at	ZEB1	zinc finger E-box binding homeobox 1	2.20373	3.41664	4.32614
225204_PM_at	PPTC7	PTC7 protein phosphatase homolog (S. cerevisiae)	1.29163	3.40855	6.27519
203680_PM_at	PRKAR2B	protein kinase, cAMP-dependent, regulatory, type II, beta	3.25718	3.40568	3.26385
201998_PM_at	ST6GAL1	ST6 beta-galactosamide alpha-2,6-sialyltranferase 1	1.56854	3.40516	6.00621
201601_PM_x_at	IFITM1	interferon induced transmembrane protein 1 (9-27)	1.31966	3.40025	5.49944
242767_PM_at	LMCD1	LIM and cysteine-rich domains 1	5.21734	3.39907	2.17929
224970_PM_at	NFIA	nuclear factor I/A	3.07914	3.39815	4.12131
214023_PM_x_at	TUBB2B	tubulin, beta 2B	1.25421	3.38788	1.64087
223464_PM_at	OSBPL5	oxysterol binding protein-like 5	2.8606	3.36039	4.02181
206697_PM_s_at	HP	haptoglobin	1.27937	3.3488	15.5865
208161_PM_s_at	ABCC3	ATP-binding cassette, sub-family C (CFTR/MRP), member 3	1.96571	3.34553	5.13723
213763_PM_at	HIPK2	homeodomain interacting protein kinase 2	2.44051	3.34311	3.75162
229831_PM_at	CNTN3	contactin 3 (plasmacytoma associated)	1.99952	3.32046	7.51878
203904_PM_x_at	CD82	CD82 molecule	1.64228	3.32006	4.03288
200648_PM_s_at	GLUL	glutamate-ammonia ligase (glutamine synthetase)	3.31752	3.29998	4.06796
243403_PM_x_at	CPM	carboxypeptidase M	3.32825	3.29154	3.21198
230051_PM_at	C10orf47	chromosome 10 open reading frame 47	3.33984	3.28253	2.89921
203186_PM_s_at	S100A4	S100 calcium binding protein A4	1.31339	3.27323	5.10796
217504_PM_at	ABCA6	ATP-binding cassette, sub-family A (ABC1), member 6	1.30057	3.27256	8.35744
227826_PM_s_at	---	---	2.617	3.26774	3.2943
206910_PM_x_at	CFHR2	complement factor H-related 2	2.01119	3.26463	4.42782
220187_PM_at	STEAP4	STEAP family member 4	1.02109	3.26231	3.1522
221541_PM_at	CRISPLD2	cysteine-rich secretory protein LCCL domain containing 2	3.1319	3.25601	1.68835
204136_PM_at	COL7A1	collagen, type VII, alpha 1	2.34228	3.25524	7.79089
1555345_PM_at	SLC38A4	solute carrier family 38, member 4	2.57938	3.25129	6.59198
243857_PM_at	MORF4L2	Mortality factor 4 like 2	2.71162	3.24098	2.66744
225571_PM_at	LIFR	leukemia inhibitory factor receptor alpha	1.09274	3.22301	1.65642
219049_PM_at	CSGALNACT1	chondroitin sulfate N-acetylgalactosaminyltransferase 1	0.86548	3.21429	2.17053
208396_PM_s_at	PDE1A	phosphodiesterase 1A, calmodulin-dependent	1.07519	3.20456	10.026
226908_PM_at	LRIG3	leucine-rich repeats and immunoglobulin-like domains 3	1.95507	3.18964	4.76297
228347_PM_at	SIX1	SIX homeobox 1	2.60727	3.17602	3.5203
210121_PM_at	B3GALT2	UDP-Gal:betaGlcNAc beta 1,3-galactosyltransferase, polypeptide 2	5.76134	3.16389	2.24634
235099_PM_at	CMTM8	CKLF-like MARVEL transmembrane domain containing 8	1.72994	3.1615	5.21086
234051_PM_at	---	---	2.86497	3.16004	3.4157
40837_PM_at	TLE2	transducin-like enhancer of split 2 (E(sp1) homolog, Drosophila)	1.28233	3.15365	6.01171
208763_PM_s_at	TSC22D3	TSC22 domain family, member 3	2.39062	3.11219	4.7361
209641_PM_s_at	ABCC3	ATP-binding cassette, sub-family C (CFTR/MRP), member 3	2.3386	3.10893	4.4357
225239_PM_at	---	---	1.68927	3.10816	3.54004
211862_PM_x_at	CFLAR	CASP8 and FADD-like apoptosis regulator	3.15549	3.09477	3.68087
1561418_PM_at	---	---	2.85945	3.06968	5.12507
227020_PM_at	YPEL2	yippee-like 2 (Drosophila)	1.73767	3.05519	5.97236
215388_PM_s_at	CFH /// CFHR1	complement factor H /// complement factor H-related 1	1.71587	3.05228	4.22285
217312_PM_s_at	COL7A1	collagen, type VII, alpha 1	2.16126	3.03182	6.6892
226961_PM_at	PRR15	proline rich 15	3.62582	3.03033	2.9923
214297_PM_at	CSPG4	chondroitin sulfate proteoglycan 4	2.69446	3.02649	2.83768
219315_PM_s_at	TMEM204	transmembrane protein 204	1.82702	3.02532	5.35481
244885_PM_at	---	---	0.912585	3.01727	3.89827
227062_PM_at	NEAT1	nuclear paraspeckle assembly transcript 1 (non-protein coding)	1.9819	3.01371	4.79062
223126_PM_s_at	C1orf21	chromosome 1 open reading frame 21	2.06456	3.00991	2.45406
208485_PM_x_at	CFLAR	CASP8 and FADD-like apoptosis regulator	3.01187	3.00735	3.53885
226857_PM_at	ARHGEF19	Rho guanine nucleotide exchange factor (GEF) 19	2.537	3.00327	3.263
213493_PM_at	SNED1	sushi, nidogen and EGF-like domains 1	0.974891	3.0016	8.76784
1554741_PM_s_at	FGF7 /// KGFLP1 /// KGFLP2	fibroblast growth factor 7 (keratinocyte growth factor) /// keratinocyte growth factor-like protein 1 /// keratinocyte growth factor-like protein 2	2.04716	2.99625	2.82365
206390_PM_x_at	PF4	platelet factor 4	1.97151	2.98768	3.96599
1557720_PM_s_at	MYO16	myosin XVI	2.71539	2.98197	6.6868
229801_PM_at	C10orf47	chromosome 10 open reading frame 47	2.77747	2.98032	2.83169
212807_PM_s_at	SORT1	sortilin 1	3.88799	2.97334	2.59547
221009_PM_s_at	ANGPTL4	angiopoietin-like 4	2.74719	2.96933	6.22277
229779_PM_at	COL4A4	collagen, type IV, alpha 4	2.17951	2.96895	3.34794
221214_PM_s_at	NELF	nasal embryonic LHRH factor	3.23299	2.96161	2.51235
218330_PM_s_at	NAV2	neuron navigator 2	3.82777	2.96127	4.90447
210564_PM_x_at	CFLAR	CASP8 and FADD-like apoptosis regulator	2.84758	2.96028	3.23716
209185_PM_s_at	IRS2	insulin receptor substrate 2	4.0342	2.95803	4.23882
204042_PM_at	WASF3	WAS protein family, member 3	2.16527	2.95717	4.30096
209763_PM_at	CHRDL1	chordin-like 1	0.837101	2.93569	1.29132
213652_PM_at	PCSK5	Proprotein convertase subtilisin/kexin type 5	1.57941	2.91754	6.17767
37022_PM_at	PRELP	proline/arginine-rich end leucine-rich repeat protein	1.82274	2.91174	10.7207
217202_PM_s_at	GLUL	glutamate-ammonia ligase (glutamine synthetase)	3.02538	2.91094	3.70715
222784_PM_at	SMOC1	SPARC related modular calcium binding 1	3.54358	2.90915	4.383
213056_PM_at	FRMD4B	FERM domain containing 4B	2.42004	2.90041	6.158
238669_PM_at	PTGS1	prostaglandin-endoperoxide synthase 1 (prostaglandin G/H synthase and cyclooxygenase)	1.70248	2.89356	9.60103
209184_PM_s_at	IRS2	insulin receptor substrate 2	4.46302	2.88441	3.90495
232180_PM_at	UGP2	UDP-glucose pyrophosphorylase 2	2.09048	2.88132	3.66408
212510_PM_at	GPD1L	glycerol-3-phosphate dehydrogenase 1-like	2.08415	2.88091	3.00775
231118_PM_at	ANKRD35	ankyrin repeat domain 35	1.75692	2.88053	3.97748
216840_PM_s_at	LAMA2	laminin, alpha 2	1.46459	2.87936	7.45044
1552508_PM_at	KCNE4	potassium voltage-gated channel, Isk-related family, member 4	1.40774	2.8763	4.73348
212670_PM_at	ELN	elastin	4.61437	2.87354	1.68081
201827_PM_at	SMARCD2	SWI/SNF related, matrix associated, actin dependent regulator of chromatin, subfamily d, member 2	1.89582	2.86517	3.82171
240897_PM_at	---	---	2.97682	2.86307	2.29691
1568598_PM_at	KAZALD1	Kazal-type serine peptidase inhibitor domain 1	4.04344	2.8556	2.43476
203088_PM_at	FBLN5	fibulin 5	2.89553	2.85336	3.86343
240556_PM_at	DCN	Decorin	2.3797	2.84825	2.19262
214486_PM_x_at	CFLAR	CASP8 and FADD-like apoptosis regulator	2.54832	2.8479	3.19455
224261_PM_at	---	---	2.48657	2.82358	2.42753
210147_PM_at	ART3	ADP-ribosyltransferase 3	2.1086	2.81709	13.5303
225016_PM_at	APCDD1	adenomatosis polyposis coli down-regulated 1	1.64952	2.80428	4.75784
207290_PM_at	PLXNA2	plexin A2	5.64854	2.7918	3.66151
205119_PM_s_at	FPR1	formyl peptide receptor 1	2.70986	2.78305	3.42698
204160_PM_s_at	ENPP4	ectonucleotide pyrophosphatase/phosphodiesterase 4 (putative function)	1.52947	2.77664	4.06299
231098_PM_at	---	---	2.24449	2.76695	3.30996
204916_PM_at	RAMP1	receptor (G protein-coupled) activity modifying protein 1	6.26768	2.76513	4.32829
203487_PM_s_at	ARMC8	armadillo repeat containing 8	2.42341	2.76347	2.8503
201700_PM_at	CCND3	cyclin D3	2.30834	2.76324	2.37016
205200_PM_at	CLEC3B	C-type lectin domain family 3, member B	1.30213	2.7626	4.57638
222062_PM_at	IL27RA	interleukin 27 receptor, alpha	2.30995	2.75734	4.96241
52255_PM_s_at	COL5A3	collagen, type V, alpha 3	1.45673	2.75518	8.05511
212660_PM_at	PHF15	PHD finger protein 15	2.05137	2.74664	3.62565
209335_PM_at	DCN	decorin	2.0278	2.74486	3.30011
224061_PM_at	INMT	indolethylamine N-methyltransferase	1.84951	2.73617	4.49876
220486_PM_x_at	TMEM164	transmembrane protein 164	1.83771	2.72387	3.31308
232825_PM_s_at	DSEL	dermatan sulfate epimerase-like	1.63423	2.70928	4.43616
205403_PM_at	IL1R2	interleukin 1 receptor, type II	1.03521	2.69884	2.73228
217452_PM_s_at	B3GALT2	UDP-Gal:betaGlcNAc beta 1,3-galactosyltransferase, polypeptide 2	5.3878	2.6818	1.94041
204326_PM_x_at	MT1X	metallothionein 1X	2.0149	2.64805	2.93223
232235_PM_at	DSEL	dermatan sulfate epimerase-like	1.77496	2.63856	3.75303
225116_PM_at	HIPK2	homeodomain interacting protein kinase 2	2.16253	2.63715	2.67741
205817_PM_at	SIX1	SIX homeobox 1	2.60902	2.62387	3.55857
202008_PM_s_at	NID1	nidogen 1	1.90434	2.62198	4.33484
242281_PM_at	---	---	2.36188	2.61719	4.17455
212758_PM_s_at	ZEB1	zinc finger E-box binding homeobox 1	1.97478	2.61614	3.08186
201743_PM_at	CD14	CD14 molecule	1.05655	2.6127	7.14913
214719_PM_at	SLC46A3	solute carrier family 46, member 3	2.8831	2.6007	4.80604
237400_PM_at	---	---	2.24746	2.5965	2.21468
242945_PM_at	FAM20A	family with sequence similarity 20, member A	0.853728	2.59038	1.22964
209508_PM_x_at	CFLAR	CASP8 and FADD-like apoptosis regulator	2.54359	2.58005	3.12498
224596_PM_at	SLC44A1	solute carrier family 44, member 1	2.08994	2.57447	2.97488
231337_PM_at	---	---	1.36971	2.57346	5.77307
211316_PM_x_at	CFLAR	CASP8 and FADD-like apoptosis regulator	2.59443	2.56926	2.71309
223531_PM_x_at	GPR89A /// GPR89B /// GPR89C	G protein-coupled receptor 89A /// G protein-coupled receptor 89B /// G protein-coupled receptor 89C	1.97792	2.56381	3.93731
225463_PM_x_at	GPR89A /// GPR89B /// GPR89C	G protein-coupled receptor 89A /// G protein-coupled receptor 89B /// G protein-coupled receptor 89C	1.81846	2.55892	3.64124
220642_PM_x_at	GPR89A /// GPR89B /// GPR89C	G protein-coupled receptor 89A /// G protein-coupled receptor 89B /// G protein-coupled receptor 89C	1.88918	2.55845	3.67858
209321_PM_s_at	ADCY3	adenylate cyclase 3	1.55969	2.55199	3.79055
204114_PM_at	NID2	nidogen 2 (osteonidogen)	2.74257	2.53852	2.03198
224595_PM_at	SLC44A1	solute carrier family 44, member 1	2.08846	2.53185	2.71114
225097_PM_at	HIPK2	homeodomain interacting protein kinase 2	2.31357	2.52973	2.64302
222140_PM_s_at	GPR89A /// GPR89B /// GPR89C	G protein-coupled receptor 89A /// G protein-coupled receptor 89B /// G protein-coupled receptor 89C	2.0265	2.52396	3.9409
228486_PM_at	SLC44A1	solute carrier family 44, member 1	1.91764	2.52375	4.66301
226665_PM_at	AHSA2	AHA1, activator of heat shock 90kDa protein ATPase homolog 2 (yeast)	1.42251	2.52232	3.26699
1556606_PM_at	NAV2	neuron navigator 2	2.46196	2.52056	5.38468
220244_PM_at	LOH3CR2A	loss of heterozygosity, 3, chromosomal region 2, gene A	3.73941	2.5081	3.34074
219028_PM_at	HIPK2	homeodomain interacting protein kinase 2	2.36118	2.50658	2.56639
218665_PM_at	FZD4	frizzled homolog 4 (Drosophila)	3.17862	2.49717	3.07741
223679_PM_at	CTNNB1	catenin (cadherin-associated protein), beta 1, 88kDa	2.29586	2.49332	2.84662
205357_PM_s_at	AGTR1	angiotensin II receptor, type 1	1.76549	2.4882	3.61433
214180_PM_at	MAN1C1	mannosidase, alpha, class 1C, member 1	0.99121	2.48761	16.2872
203486_PM_s_at	ARMC8	armadillo repeat containing 8	2.40359	2.48257	2.19936
218730_PM_s_at	OGN	osteoglycin	0.967456	2.48229	9.0168
225968_PM_at	PRICKLE2	prickle homolog 2 (Drosophila)	1.62287	2.4766	4.02215
227554_PM_at	---	---	1.79936	2.47078	3.67553
204575_PM_s_at	MMP19	matrix metallopeptidase 19	1.96297	2.46727	3.18031
202709_PM_at	FMOD	fibromodulin	1.20989	2.46707	4.62552
216598_PM_s_at	CCL2	chemokine (C-C motif) ligand 2	0.102418	2.46527	1.37499
222696_PM_at	AXIN2	axin 2	2.1602	2.46411	2.10596
201325_PM_s_at	EMP1	epithelial membrane protein 1	1.90752	2.45799	3.21724
225612_PM_s_at	B3GNT5	UDP-GlcNAc:betaGal beta-1,3-N-acetylglucosaminyltransferase 5	2.80395	2.45793	3.67558
224818_PM_at	SORT1	sortilin 1	3.44935	2.44942	2.61935
203886_PM_s_at	FBLN2	fibulin 2	0.907228	2.44673	4.49229
229310_PM_at	KLHL29	kelch-like 29 (Drosophila)	2.08624	2.44201	2.30939
213110_PM_s_at	COL4A5	collagen, type IV, alpha 5	1.60539	2.42603	4.80579
213714_PM_at	CACNB2	calcium channel, voltage-dependent, beta 2 subunit	1.34792	2.41655	5.75307
235076_PM_at	CALCOCO2	calcium binding and coiled-coil domain 2	2.17031	2.41556	3.20826
202371_PM_at	TCEAL4	transcription elongation factor A (SII)-like 4	2.04298	2.40088	2.3538
215001_PM_s_at	GLUL	glutamate-ammonia ligase (glutamine synthetase)	2.40027	2.39607	2.81909
201502_PM_s_at	NFKBIA	nuclear factor of kappa light polypeptide gene enhancer in B-cells inhibitor, alpha	2.64553	2.38775	2.04376
209939_PM_x_at	CFLAR	CASP8 and FADD-like apoptosis regulator	2.17573	2.38179	2.15938
213462_PM_at	NPAS2	neuronal PAS domain protein 2	1.76991	2.3786	5.49159
236038_PM_at	---	---	1.45564	2.37767	4.31484
210563_PM_x_at	CFLAR	CASP8 and FADD-like apoptosis regulator	2.32095	2.36756	2.29941
202017_PM_at	EPHX1	epoxide hydrolase 1, microsomal (xenobiotic)	1.85425	2.35052	4.31464
213800_PM_at	CFH	complement factor H	1.24992	2.34898	3.71189
205730_PM_s_at	ABLIM3	actin binding LIM protein family, member 3	2.03586	2.3482	3.68596
223623_PM_at	C2orf40	chromosome 2 open reading frame 40	1.20396	2.34728	10.6045
225368_PM_at	HIPK2	homeodomain interacting protein kinase 2	1.97363	2.3463	2.49811
209614_PM_at	ADH1B	alcohol dehydrogenase 1B (class I), beta polypeptide	1.33246	2.34378	4.80841
204526_PM_s_at	TBC1D8	TBC1 domain family, member 8 (with GRAM domain)	1.67734	2.34332	5.01118
223658_PM_at	KCNK6	potassium channel, subfamily K, member 6	4.08796	2.34318	1.64962
208581_PM_x_at	MT1X	metallothionein 1X	1.90476	2.32876	2.49346
231001_PM_at	FIBIN	fin bud initiation factor homolog (zebrafish)	0.506643	2.32431	3.25049
201531_PM_at	ZFP36	zinc finger protein 36, C3H type, homolog (mouse)	2.35966	2.31899	2.61849
202283_PM_at	SERPINF1	serpin peptidase inhibitor, clade F (alpha-2 antiplasmin, pigment epithelium derived factor), member 1	0.99935	2.31317	4.50193
209540_PM_at	IGF1	insulin-like growth factor 1 (somatomedin C)	0.755518	2.30665	0.80196
213488_PM_at	SNED1	sushi, nidogen and EGF-like domains 1	0.895601	2.30293	6.37133
207692_PM_s_at	ACAN	aggrecan	8.06282	2.30142	2.07697
217853_PM_at	TNS3	tensin 3	2.24002	2.29558	4.02646
213183_PM_s_at	CDKN1C	Cyclin-dependent kinase inhibitor 1C (p57, Kip2)	2.32158	2.29397	2.43792
216594_PM_x_at	AKR1C1	aldo-keto reductase family 1, member C1 (dihydrodiol dehydrogenase 1; 20-alpha (3-alpha)-hydroxysteroid dehydrogenase)	0.748049	2.29126	4.06832
234985_PM_at	LDLRAD3	low density lipoprotein receptor class A domain containing 3	1.03717	2.28617	3.7953
228959_PM_at	---	---	0.932083	2.28583	4.18671
205132_PM_at	ACTC1	actin, alpha, cardiac muscle 1	5.67433	2.28504	0.587066
230577_PM_at	---	---	1.55573	2.27903	3.75923
204290_PM_s_at	ALDH6A1	aldehyde dehydrogenase 6 family, member A1	2.03774	2.27265	2.51172
225115_PM_at	HIPK2	homeodomain interacting protein kinase 2	1.94839	2.27151	2.70034
209699_PM_x_at	AKR1C2	aldo-keto reductase family 1, member C2 (dihydrodiol dehydrogenase 2; bile acid binding protein; 3-alpha hydroxysteroid dehydrogenase, type III)	0.734423	2.26258	4.24615
220643_PM_s_at	FAIM	Fas apoptotic inhibitory molecule	2.00519	2.25529	2.4233
233181_PM_at	---	---	1.49483	2.25166	5.89428
204151_PM_x_at	AKR1C1	aldo-keto reductase family 1, member C1 (dihydrodiol dehydrogenase 1; 20-alpha (3-alpha)-hydroxysteroid dehydrogenase)	0.73787	2.24746	3.81726
39549_PM_at	NPAS2	neuronal PAS domain protein 2	1.51873	2.24475	5.04403
234233_PM_s_at	---	---	2.0177	2.24177	4.63348
201041_PM_s_at	DUSP1	dual specificity phosphatase 1	2.97673	2.23949	2.13999
209541_PM_at	IGF1	insulin-like growth factor 1 (somatomedin C)	0.588323	2.23727	0.70396
210817_PM_s_at	CALCOCO2	calcium binding and coiled-coil domain 2	2.00076	2.2356	2.44185
206101_PM_at	ECM2	extracellular matrix protein 2, female organ and adipocyte specific	1.05689	2.23333	5.42624
1552619_PM_a_at	ANLN	anillin, actin binding protein	2.95918	2.22578	0.861055
229163_PM_at	CAMK2N1	calcium/calmodulin-dependent protein kinase II inhibitor 1	2.84929	2.21579	3.63359
201963_PM_at	ACSL1	acyl-CoA synthetase long-chain family member 1	1.19499	2.21339	3.90267
223316_PM_at	CCDC3	coiled-coil domain containing 3	1.10254	2.21182	26.8735
218975_PM_at	COL5A3	collagen, type V, alpha 3	1.169	2.20576	5.0894
37996_PM_s_at	DMPK	dystrophia myotonica-protein kinase	2.53426	2.20481	2.40096
229014_PM_at	FLJ42709	hypothetical LOC441094	1.98055	2.20462	3.22605
218574_PM_s_at	LMCD1	LIM and cysteine-rich domains 1	2.68315	2.19808	2.51484
212021_PM_s_at	MKI67	antigen identified by monoclonal antibody Ki-67	2.82919	2.19658	0.76023
227425_PM_at	REPS2	RALBP1 associated Eps domain containing 2	0.941724	2.18829	6.12068
212235_PM_at	PLXND1	plexin D1	2.23584	2.1791	2.56317
211653_PM_x_at	AKR1C2	aldo-keto reductase family 1, member C2 (dihydrodiol dehydrogenase 2; bile acid binding protein; 3-alpha hydroxysteroid dehydrogenase, type III)	0.696862	2.16499	4.01645
213993_PM_at	SPON1	spondin 1, extracellular matrix protein	1.14185	2.16361	5.84897
205559_PM_s_at	PCSK5	proprotein convertase subtilisin/kexin type 5	1.26028	2.15697	4.74383
217161_PM_x_at	ACAN	aggrecan	7.64808	2.13793	2.03972
1557079_PM_at	ITGBL1	Integrin, beta-like 1 (with EGF-like repeat domains)	2.39888	2.13693	3.4646
208096_PM_s_at	COL21A1	collagen, type XXI, alpha 1	0.88895	2.11363	6.69297
1568779_PM_a_at	ECM2	extracellular matrix protein 2, female organ and adipocyte specific	1.49191	2.11291	4.90983
236234_PM_at	PDE1A	phosphodiesterase 1A, calmodulin-dependent	1.21478	2.1022	3.99862
237466_PM_s_at	HHIP	hedgehog interacting protein	5.64092	2.09443	0.751034
229572_PM_at	ATP6V0A2	ATPase, H+ transporting, lysosomal V0 subunit a2	2.27143	2.09044	2.34783
209211_PM_at	KLF5	Kruppel-like factor 5 (intestinal)	3.95237	2.08977	1.58346
209160_PM_at	AKR1C3	aldo-keto reductase family 1, member C3 (3-alpha hydroxysteroid dehydrogenase, type II)	0.61658	2.07883	3.02582
231993_PM_at	ITGBL1	Integrin, beta-like 1 (with EGF-like repeat domains)	1.98396	2.06931	2.44669
223611_PM_s_at	LNX1	ligand of numb-protein X 1	1.11092	2.06581	4.20129
239336_PM_at	THBS1	Thrombospondin 1	3.89975	2.06426	1.60569
209883_PM_at	GLT25D2	glycosyltransferase 25 domain containing 2	1.78554	2.0554	7.1394
205679_PM_x_at	ACAN	aggrecan	6.7117	1.99989	1.93378
208018_PM_s_at	HCK	hemopoietic cell kinase	1.40828	1.99055	5.67983
233547_PM_x_at	PDE1A	phosphodiesterase 1A, calmodulin-dependent	1.05695	1.98567	6.32927
236704_PM_at	---	---	1.1633	1.97366	3.31218
205450_PM_at	PHKA1	phosphorylase kinase, alpha 1 (muscle)	1.08075	1.97113	3.43721
229876_PM_at	PHKA1	phosphorylase kinase, alpha 1 (muscle)	0.985909	1.95814	4.0408
209212_PM_s_at	KLF5	Kruppel-like factor 5 (intestinal)	4.60288	1.95406	1.87407
218918_PM_at	MAN1C1	mannosidase, alpha, class 1C, member 1	1.06753	1.94535	11.1448
226953_PM_at	DARC	Duffy blood group, chemokine receptor	1.14509	1.92419	3.16068
228302_PM_x_at	CAMK2N1	calcium/calmodulin-dependent protein kinase II inhibitor 1	3.13505	1.92384	3.68227
227803_PM_at	ENPP5	ectonucleotide pyrophosphatase/phosphodiesterase 5 (putative function)	1.14903	1.92069	5.65667
205560_PM_at	PCSK5	proprotein convertase subtilisin/kexin type 5	1.16628	1.91984	4.88781
222599_PM_s_at	NAV2	neuron navigator 2	3.10617	1.91719	2.80026
223235_PM_s_at	SMOC2	SPARC related modular calcium binding 2	1.03886	1.90882	8.22944
230135_PM_at	---	---	8.00178	1.90649	0.850195
211538_PM_s_at	HSPA2	heat shock 70kDa protein 2	3.37937	1.90039	1.26084
202669_PM_s_at	EFNB2	ephrin-B2	1.66496	1.89627	3.55667
203836_PM_s_at	MAP3K5	mitogen-activated protein kinase kinase kinase 5	2.09814	1.89317	2.49842
235746_PM_s_at	PLA2R1	phospholipase A2 receptor 1, 180kDa	1.1587	1.88917	4.79917
214238_PM_at	---	---	1.77245	1.88617	4.86203
1555854_PM_at	---	---	0.820988	1.84437	5.60842
1552289_PM_a_at	CILP2	cartilage intermediate layer protein 2	1.42005	1.82076	7.2894
207808_PM_s_at	PROS1	protein S (alpha)	1.15051	1.81075	3.33581
212023_PM_s_at	MKI67	antigen identified by monoclonal antibody Ki-67	2.37538	1.78838	0.582408
209891_PM_at	SPC25	SPC25, NDC80 kinetochore complex component, homolog (S. cerevisiae)	2.04988	1.78379	0.581343
212338_PM_at	MYO1D	myosin ID	1.58481	1.78242	4.52999
226769_PM_at	FIBIN	fin bud initiation factor homolog (zebrafish)	0.547513	1.78142	2.54536
229978_PM_at	LOC729993	hypothetical protein LOC729993	1.32184	1.78078	4.27391
220117_PM_at	ZNF385D	zinc finger protein 385D	0.882561	1.75098	3.60667
213308_PM_at	SHANK2	SH3 and multiple ankyrin repeat domains 2	4.37975	1.74508	1.06647
228323_PM_at	CASC5	cancer susceptibility candidate 5	1.97161	1.73673	0.644884
204822_PM_at	TTK	TTK protein kinase	2.11716	1.71456	0.616333
1556037_PM_s_at	HHIP	hedgehog interacting protein	5.21664	1.68877	0.762853
201625_PM_s_at	INSIG1	insulin induced gene 1	0.466339	1.67138	1.50478
203362_PM_s_at	MAD2L1	MAD2 mitotic arrest deficient-like 1 (yeast)	1.69734	1.65762	0.590696
206632_PM_s_at	APOBEC3B	apolipoprotein B mRNA editing enzyme, catalytic polypeptide-like 3B	2.01378	1.65391	0.495974
203276_PM_at	LMNB1	lamin B1	2.07267	1.64937	0.544437
212067_PM_s_at	C1R	complement component 1, r subcomponent	0.629049	1.64257	2.86551
235743_PM_at	---	---	1.07848	1.63983	6.67551
221489_PM_s_at	SPRY4	sprouty homolog 4 (Drosophila)	3.07386	1.63797	4.37497
1553194_PM_at	NEGR1	neuronal growth regulator 1	2.73016	1.62964	2.51409
1555318_PM_at	HIF3A	hypoxia inducible factor 3, alpha subunit	1.33526	1.61637	3.71522
203143_PM_s_at	KIAA0040	KIAA0040	1.50369	1.60957	3.26201
1556069_PM_s_at	HIF3A	hypoxia inducible factor 3, alpha subunit	0.9774	1.60176	4.11584
204955_PM_at	SRPX	sushi-repeat-containing protein, X-linked	1.09388	1.60091	3.16743
1558680_PM_s_at	PDE1A	phosphodiesterase 1A, calmodulin-dependent	1.106	1.59697	3.93841
205733_PM_at	BLM	Bloom syndrome, RecQ helicase-like	2.23552	1.58703	0.596301
223044_PM_at	SLC40A1	solute carrier family 40 (iron-regulated transporter), member 1	1.13632	1.55747	5.50966
227354_PM_at	PAG1	phosphoprotein associated with glycosphingolipid microdomains 1	1.24889	1.55431	3.78708
229121_PM_at	CMKLR1	chemokine-like receptor 1	0.543459	1.52704	4.34481
1552680_PM_a_at	CASC5	cancer susceptibility candidate 5	2.34204	1.51484	0.665151
227654_PM_at	FAM65C	family with sequence similarity 65, member C	1.31555	1.51159	5.46671
52651_PM_at	COL8A2	collagen, type VIII, alpha 2	0.84364	1.49817	3.16905
211806_PM_s_at	KCNJ15	potassium inwardly-rectifying channel, subfamily J, member 15	0.938652	1.48347	3.34494
224724_PM_at	SULF2	sulfatase 2	0.414908	1.47126	1.41532
225720_PM_at	SYNPO2	synaptopodin 2	2.34276	1.46083	0.545097
221900_PM_at	COL8A2	collagen, type VIII, alpha 2	0.755831	1.43759	3.08406
238353_PM_at	RASL11A	RAS-like, family 11, member A	3.23309	1.42582	1.14583
204709_PM_s_at	KIF23	kinesin family member 23	1.75005	1.42173	0.543941
201010_PM_s_at	TXNIP	thioredoxin interacting protein	1.21796	1.41992	0.185664
233555_PM_s_at	SULF2	sulfatase 2	0.434447	1.41877	1.25418
205404_PM_at	HSD11B1	hydroxysteroid (11-beta) dehydrogenase 1	1.03048	1.41795	7.4651
201755_PM_at	MCM5	minichromosome maintenance complex component 5	2.22857	1.41172	0.592858
219622_PM_at	RAB20	RAB20, member RAS oncogene family	0.38027	1.40545	1.29
210479_PM_s_at	RORA	RAR-related orphan receptor A	0.635403	1.40103	2.74544
221795_PM_at	NTRK2	neurotrophic tyrosine kinase, receptor, type 2	1.0629	1.38489	5.53636
207826_PM_s_at	ID3	inhibitor of DNA binding 3, dominant negative helix-loop-helix protein	3.50225	1.38297	0.551596
228523_PM_at	NANOS1	nanos homolog 1 (Drosophila)	0.895257	1.37073	4.91507
200795_PM_at	SPARCL1	SPARC-like 1 (hevin)	1.07622	1.36669	4.95299
201627_PM_s_at	INSIG1	insulin induced gene 1	0.514622	1.36576	1.47757
229060_PM_at	YPEL2	yippee-like 2 (Drosophila)	1.41637	1.36481	3.39693
216874_PM_at	DKFZp686O1327	Hypothetical gene supported by BC043549; BX648102	1.01546	1.35325	2.37111
210426_PM_x_at	RORA	RAR-related orphan receptor A	0.66669	1.3521	2.57101
201626_PM_at	INSIG1	insulin induced gene 1	0.532216	1.35155	1.37322
212020_PM_s_at	MKI67	antigen identified by monoclonal antibody Ki-67	2.4694	1.34903	0.553862
202022_PM_at	ALDOC	aldolase C, fructose-bisphosphate	0.616902	1.34591	2.72478
227721_PM_at	CPAMD8	C3 and PZP-like, alpha-2-macroglobulin domain containing 8	1.00784	1.33311	5.01762
206509_PM_at	PIP	prolactin-induced protein	1.10484	1.33274	8.45439
201008_PM_s_at	TXNIP	thioredoxin interacting protein	1.26851	1.33053	0.18308
226325_PM_at	ADSSL1	adenylosuccinate synthase like 1	1.05984	1.3303	2.74009
203424_PM_s_at	IGFBP5	insulin-like growth factor binding protein 5	0.0824385	1.32614	2.82832
211748_PM_x_at	PTGDS	prostaglandin D2 synthase 21kDa (brain)	0.487602	1.3215	4.59921
212187_PM_x_at	PTGDS	prostaglandin D2 synthase 21kDa (brain)	0.500631	1.32129	4.73425
235740_PM_at	---	---	1.49986	1.31873	4.09958
1563038_PM_at	---	---	0.971183	1.31426	5.55726
213256_PM_at	39875	membrane-associated ring finger (C3HC4) 3	0.895866	1.30646	2.89334
208650_PM_s_at	CD24	CD24 molecule	2.3102	1.2979	0.614184
211663_PM_x_at	PTGDS	prostaglandin D2 synthase 21kDa (brain)	0.45577	1.29553	5.59082
222680_PM_s_at	DTL	denticleless homolog (Drosophila)	2.36113	1.29432	0.476112
201107_PM_s_at	THBS1	thrombospondin 1	2.94331	1.28686	1.10553
216269_PM_s_at	ELN	elastin	3.13659	1.28306	0.875621
205645_PM_at	REPS2	RALBP1 associated Eps domain containing 2	1.01458	1.27352	3.0796
232090_PM_at	---	---	0.558108	1.26684	3.03605
203824_PM_at	TSPAN8	tetraspanin 8	0.99125	1.2663	3.08212
226610_PM_at	CENPV	centromere protein V	2.69805	1.26581	0.513976
201124_PM_at	ITGB5	integrin, beta 5	1.4076	1.26519	2.85626
201009_PM_s_at	TXNIP	thioredoxin interacting protein	1.30495	1.25376	0.160467
226611_PM_s_at	CENPV	centromere protein V	2.93981	1.25237	0.406911
210983_PM_s_at	MCM7	minichromosome maintenance complex component 7	1.74549	1.25171	0.502366
226682_PM_at	RORA	RAR-related orphan receptor A	0.696704	1.24647	2.7388
235849_PM_at	SCARA5	scavenger receptor class A, member 5 (putative)	0.885012	1.24171	3.4263
209292_PM_at	ID4	Inhibitor of DNA binding 4, dominant negative helix-loop-helix protein	3.05389	1.2407	0.383901
220651_PM_s_at	MCM10	minichromosome maintenance complex component 10	2.13799	1.23274	0.471671
223775_PM_at	HHIP	hedgehog interacting protein	2.8353	1.22147	0.723539
204014_PM_at	DUSP4	dual specificity phosphatase 4	1.18342	1.21437	3.409
242086_PM_at	---	---	0.675199	1.19468	2.58283
203812_PM_at	SLIT3	slit homolog 3 (Drosophila)	0.710753	1.19174	2.46001
232523_PM_at	MEGF10	multiple EGF-like-domains 10	1.14345	1.19108	15.0373
208937_PM_s_at	ID1	inhibitor of DNA binding 1, dominant negative helix-loop-helix protein	4.97458	1.19057	0.163897
202992_PM_at	C7	complement component 7	0.890845	1.16596	3.76657
209156_PM_s_at	COL6A2	collagen, type VI, alpha 2	0.846554	1.14029	2.2929
226218_PM_at	IL7R	interleukin 7 receptor	2.97389	1.11789	0.394547
211965_PM_at	ZFP36L1	zinc finger protein 36, C3H type-like 1	0.987476	1.11691	2.6531
208892_PM_s_at	DUSP6	dual specificity phosphatase 6	0.926624	1.10831	3.50072
219610_PM_at	RGNEF	Rho-guanine nucleotide exchange factor	1.29487	1.09566	3.11407
203961_PM_at	NEBL	nebulette	1.05499	1.0924	5.01782
220122_PM_at	MCTP1	multiple C2 domains, transmembrane 1	1.53268	1.07954	3.49409
218995_PM_s_at	EDN1	endothelin 1	2.52899	1.0789	0.927858
228827_PM_at	---	---	0.504978	1.07495	1.49455
221991_PM_at	NXPH3	neurexophilin 3	2.42711	1.07364	1.28857
208893_PM_s_at	DUSP6	dual specificity phosphatase 6	0.846249	1.0667	3.23251
205798_PM_at	IL7R	interleukin 7 receptor	3.18797	1.05129	0.504877
211959_PM_at	IGFBP5	insulin-like growth factor binding protein 5	0.191889	1.0487	1.5908
228708_PM_at	RAB27B	RAB27B, member RAS oncogene family	0.295226	1.04869	1.11798
226034_PM_at	---	---	1.13793	1.04577	3.23228
205476_PM_at	CCL20	chemokine (C-C motif) ligand 20	1.06498	1.03671	3.20861
219529_PM_at	CLIC3	chloride intracellular channel 3	2.56858	1.03179	0.544566
220540_PM_at	KCNK15	potassium channel, subfamily K, member 15	0.779288	1.02616	4.43492
227875_PM_at	KLHL13	kelch-like 13 (Drosophila)	1.42613	1.02083	0.388859
206070_PM_s_at	EPHA3	EPH receptor A3	0.35742	1.0136	2.14601
202421_PM_at	IGSF3	immunoglobulin superfamily, member 3	0.8416	1.01086	7.47724
209016_PM_s_at	KRT7	keratin 7	1.64616	1.01074	0.353398
225283_PM_at	ARRDC4	arrestin domain containing 4	0.759854	1.01002	0.299369
208891_PM_at	DUSP6	dual specificity phosphatase 6	0.896371	1.00804	2.86113
223839_PM_s_at	SCD	stearoyl-CoA desaturase (delta-9-desaturase)	0.384381	1.00125	1.3562
236532_PM_at	C11orf87	chromosome 11 open reading frame 87	1.68273	0.993774	0.336999
218976_PM_at	DNAJC12	DnaJ (Hsp40) homolog, subfamily C, member 12	0.466195	0.990107	1.44213
235609_PM_at	---	---	1.70673	0.988482	0.260857
1558706_PM_a_at	ATOH8	Atonal homolog 8 (Drosophila)	2.46403	0.984548	0.725397
209732_PM_at	CLEC2B	C-type lectin domain family 2, member B	0.815471	0.980591	2.80511
205941_PM_s_at	COL10A1	collagen, type X, alpha 1	0.826966	0.978876	4.24433
228407_PM_at	SCUBE3	signal peptide, CUB domain, EGF-like 3	2.51899	0.97141	0.435431
209293_PM_x_at	ID4	inhibitor of DNA binding 4, dominant negative helix-loop-helix protein	2.16878	0.969439	0.357471
203951_PM_at	CNN1	calponin 1, basic, smooth muscle	1.03096	0.966558	0.345369
200832_PM_s_at	SCD	stearoyl-CoA desaturase (delta-9-desaturase)	0.370478	0.964132	1.45646
205579_PM_at	HRH1	histamine receptor H1	0.742476	0.963573	2.23956
1557181_PM_s_at	C11orf87	chromosome 11 open reading frame 87	1.13789	0.947966	0.250416
217428_PM_s_at	COL10A1	collagen, type X, alpha 1	0.806144	0.933619	3.76598
215177_PM_s_at	ITGA6	integrin, alpha 6	0.997128	0.931119	0.347633
221258_PM_s_at	KIF18A	kinesin family member 18A	1.51458	0.925373	0.452732
226933_PM_s_at	LOC100287917	hypothetical protein LOC100287917	2.65811	0.916197	0.494807
1552658_PM_a_at	NAV3	neuron navigator 3	2.79476	0.914509	0.594259
206029_PM_at	ANKRD1	ankyrin repeat domain 1 (cardiac muscle)	2.75412	0.913302	1.445
203234_PM_at	UPP1	uridine phosphorylase 1	0.618665	0.896495	2.39523
230121_PM_at	C1orf133	chromosome 1 open reading frame 133	0.51492	0.894578	2.06004
1553535_PM_a_at	RANGAP1	Ran GTPase activating protein 1	1.94024	0.879176	0.542903
212125_PM_at	RANGAP1	Ran GTPase activating protein 1	2.08152	0.878549	0.651341
228128_PM_x_at	PAPPA	pregnancy-associated plasma protein A, pappalysin 1	0.815835	0.874828	0.358578
228890_PM_at	ATOH8	atonal homolog 8 (Drosophila)	3.93362	0.872319	0.570022
222802_PM_at	EDN1	endothelin 1	2.90275	0.870032	0.739835
204823_PM_at	NAV3	neuron navigator 3	2.12595	0.862139	0.777365
205580_PM_s_at	HRH1	histamine receptor H1	0.669378	0.861591	2.05273
210935_PM_s_at	WDR1	WD repeat domain 1	1.50253	0.851348	0.433381
228195_PM_at	C2orf88	chromosome 2 open reading frame 88	2.10521	0.849136	0.337029
230800_PM_at	ADCY4	adenylate cyclase 4	1.17084	0.842114	0.389047
203967_PM_at	CDC6	cell division cycle 6 homolog (S. cerevisiae)	1.43509	0.841625	0.325981
235085_PM_at	PRAGMIN	homolog of rat pragma of Rnd2	0.830695	0.835273	0.261882
224940_PM_s_at	PAPPA	pregnancy-associated plasma protein A, pappalysin 1	0.840442	0.831752	0.340415
226930_PM_at	FNDC1	fibronectin type III domain containing 1	0.709058	0.83156	0.323489
1555997_PM_s_at	IGFBP5	insulin-like growth factor binding protein 5	0.287958	0.83005	1.62553
202345_PM_s_at	FABP5	fatty acid binding protein 5 (psoriasis-associated)	1.09676	0.826786	0.269143
228582_PM_x_at	---	---	2.08413	0.822524	0.543638
218974_PM_at	SOBP	sine oculis binding protein homolog (Drosophila)	0.365395	0.814498	1.12795
207980_PM_s_at	CITED2	Cbp/p300-interacting transactivator, with Glu/Asp-rich carboxy-terminal domain, 2	1.40397	0.813033	0.374639
209291_PM_at	ID4	inhibitor of DNA binding 4, dominant negative helix-loop-helix protein	1.87825	0.807111	0.357686
218880_PM_at	FOSL2	FOS-like antigen 2	0.919256	0.806367	0.341568
211742_PM_s_at	EVI2B	ecotropic viral integration site 2B	0.442883	0.804543	1.91894
211958_PM_at	IGFBP5	insulin-like growth factor binding protein 5	0.219836	0.799095	1.59135
203304_PM_at	BAMBI	BMP and activin membrane-bound inhibitor homolog (Xenopus laevis)	1.8269	0.790486	0.439442
227719_PM_at	SMAD9	SMAD family member 9	2.2539	0.789678	0.612318
228400_PM_at	SHROOM3	shroom family member 3	2.12145	0.780479	0.620267
227764_PM_at	LYPD6	LY6/PLAUR domain containing 6	1.19691	0.777415	0.37858
224941_PM_at	PAPPA	pregnancy-associated plasma protein A, pappalysin 1	0.811628	0.769474	0.308279
204472_PM_at	GEM	GTP binding protein overexpressed in skeletal muscle	1.22331	0.761076	2.82897
230660_PM_at	SERTAD4	SERTA domain containing 4	0.40494	0.759774	2.89076
206026_PM_s_at	TNFAIP6	tumor necrosis factor, alpha-induced protein 6	0.196256	0.758207	1.47462
200831_PM_s_at	SCD	stearoyl-CoA desaturase (delta-9-desaturase)	0.313628	0.756867	1.09988
214769_PM_at	CLCN4	chloride channel 4	0.443047	0.753681	2.15995
218484_PM_at	NDUFA4L2	NADH dehydrogenase (ubiquinone) 1 alpha subcomplex, 4-like 2	0.411415	0.73864	1.96839
237753_PM_at	---	---	2.65328	0.736756	0.652919
229674_PM_at	SERTAD4	SERTA domain containing 4	0.455197	0.732681	2.28125
201310_PM_s_at	C5orf13	chromosome 5 open reading frame 13	0.994871	0.732042	0.347633
221911_PM_at	ETV1	ets variant 1	0.47862	0.723306	2.01635
205479_PM_s_at	PLAU	plasminogen activator, urokinase	0.283336	0.723103	1.12603
232914_PM_s_at	SYTL2	synaptotagmin-like 2	0.941739	0.722585	0.273399
230290_PM_at	SCUBE3	signal peptide, CUB domain, EGF-like 3	2.94082	0.722492	0.40367
223754_PM_at	C2orf88	chromosome 2 open reading frame 88	1.47049	0.708412	0.36082
227404_PM_s_at	EGR1	Early growth response 1	0.917109	0.708315	2.18975
205258_PM_at	INHBB	inhibin, beta B	0.773699	0.7056	2.13585
201981_PM_at	PAPPA	pregnancy-associated plasma protein A, pappalysin 1	0.858265	0.702728	0.282046
214078_PM_at	---	---	0.548175	0.701313	0.298892
225496_PM_s_at	SYTL2	synaptotagmin-like 2	0.97344	0.682947	0.337901
202191_PM_s_at	GAS7	growth arrest-specific 7	0.678301	0.677247	2.36766
224583_PM_at	COTL1	coactosin-like 1 (Dictyostelium)	1.16966	0.668993	0.396157
1554997_PM_a_at	PTGS2	prostaglandin-endoperoxide synthase 2 (prostaglandin G/H synthase and cyclooxygenase)	3.95884	0.665184	0.703985
202499_PM_s_at	SLC2A3	solute carrier family 2 (facilitated glucose transporter), member 3	0.371194	0.664291	0.95957
223541_PM_at	HAS3	hyaluronan synthase 3	2.7202	0.662111	0.278266
234951_PM_s_at	COL12A1	collagen, type XII, alpha 1	1.8961	0.656343	0.425026
201309_PM_x_at	C5orf13	chromosome 5 open reading frame 13	1.11084	0.656327	0.208727
1560879_PM_a_at	SYT15	synaptotagmin XV	1.90079	0.646185	0.405206
219888_PM_at	SPAG4	sperm associated antigen 4	0.339251	0.642454	1.10869
209596_PM_at	MXRA5	matrix-remodelling associated 5	0.182622	0.641155	1.22009
211681_PM_s_at	PDLIM5	PDZ and LIM domain 5	1.61173	0.641066	0.365665
206025_PM_s_at	TNFAIP6	tumor necrosis factor, alpha-induced protein 6	0.20734	0.640425	1.51189
204748_PM_at	PTGS2	prostaglandin-endoperoxide synthase 2 (prostaglandin G/H synthase and cyclooxygenase)	3.59304	0.632369	0.803083
222344_PM_at	---	---	1.48311	0.628095	0.143207
220161_PM_s_at	EPB41L4B	erythrocyte membrane protein band 4.1 like 4B	2.13299	0.627354	0.312167
201645_PM_at	TNC	tenascin C	0.225584	0.61807	0.724619
205805_PM_s_at	ROR1	receptor tyrosine kinase-like orphan receptor 1	1.6844	0.611735	0.340866
205966_PM_at	TAF13	TAF13 RNA polymerase II, TATA box binding protein (TBP)-associated factor, 18kDa	0.890775	0.609314	0.38187
206614_PM_at	GDF5	growth differentiation factor 5	0.19746	0.593463	0.573297
AFFX-HUMRGE/M10098_5_at	---	---	1.07864	0.59213	0.359078
1564494_PM_s_at	P4HB	prolyl 4-hydroxylase, beta polypeptide	0.878567	0.588825	0.303657
208614_PM_s_at	FLNB	filamin B, beta	0.945945	0.584262	0.330722
211668_PM_s_at	PLAU	plasminogen activator, urokinase	0.229176	0.5763	1.02024
202497_PM_x_at	SLC2A3	solute carrier family 2 (facilitated glucose transporter), member 3	0.326517	0.575118	0.953401
224797_PM_at	ARRDC3	arrestin domain containing 3	0.424743	0.568641	0.397162
219602_PM_s_at	FAM38B	family with sequence similarity 38, member B	1.24006	0.560356	0.140465
215357_PM_s_at	POLDIP3	polymerase (DNA-directed), delta interacting protein 3	0.925545	0.544883	0.267918
217979_PM_at	TSPAN13	tetraspanin 13	0.981754	0.537891	0.161241
213603_PM_s_at	RAC2	ras-related C3 botulinum toxin substrate 2 (rho family, small GTP binding protein Rac2)	0.810315	0.537875	0.2972
219773_PM_at	NOX4	NADPH oxidase 4	0.720529	0.5336	3.36489
214085_PM_x_at	GLIPR1	GLI pathogenesis-related 1	0.872852	0.533598	0.3084
222908_PM_at	FAM38B	family with sequence similarity 38, member B	1.17003	0.532615	0.147436
223734_PM_at	C4orf49	chromosome 4 open reading frame 49	0.715712	0.530007	0.187948
1558080_PM_s_at	DNAJC3	DnaJ (Hsp40) homolog, subfamily C, member 3	1.00088	0.526788	0.314674
204221_PM_x_at	GLIPR1	GLI pathogenesis-related 1	0.903653	0.526745	0.307808
235417_PM_at	SPOCD1	SPOC domain containing 1	0.764632	0.524137	0.144281
231867_PM_at	ODZ2	odz, odd Oz/ten-m homolog 2 (Drosophila)	0.609106	0.523859	0.273912
232027_PM_at	SYNE1	spectrin repeat containing, nuclear envelope 1	1.55566	0.52337	0.471142
203628_PM_at	IGF1R	insulin-like growth factor 1 receptor	1.73102	0.516078	0.415291
205523_PM_at	HAPLN1	hyaluronan and proteoglycan link protein 1	0.709754	0.511444	0.272841
212314_PM_at	KIAA0746	KIAA0746 protein	0.693444	0.503658	0.217625
203505_PM_at	ABCA1	ATP-binding cassette, sub-family A (ABC1), member 1	0.258893	0.49909	0.374682
204971_PM_at	CSTA	cystatin A (stefin A)	0.24976	0.497345	0.805133
226136_PM_at	GLIPR1	GLI pathogenesis-related 1	0.805322	0.496858	0.25505
218326_PM_s_at	LGR4	leucine-rich repeat-containing G protein-coupled receptor 4	0.380864	0.495975	0.278207
230424_PM_at	C5orf13	chromosome 5 open reading frame 13	1.39255	0.490479	0.325479
225285_PM_at	BCAT1	branched chain aminotransferase 1, cytosolic	0.481649	0.489326	0.431686
AFFX-HUMRGE/M10098_M_at	---	---	1.18008	0.488896	0.325111
1562415_PM_a_at	SPOCD1	SPOC domain containing 1	0.72499	0.488744	0.159954
219877_PM_at	ZMAT4	zinc finger, matrin type 4	0.426241	0.481136	0.402204
213606_PM_s_at	ARHGDIA	Rho GDP dissociation inhibitor (GDI) alpha	1.02625	0.479532	0.218699
203477_PM_at	COL15A1	collagen, type XV, alpha 1	0.327819	0.475484	1.61327
1555480_PM_a_at	FBLIM1	filamin binding LIM protein 1	1.05605	0.474979	0.341159
239066_PM_at	---	---	0.59546	0.471024	0.28061
203228_PM_at	PAFAH1B3	platelet-activating factor acetylhydrolase, isoform Ib, subunit 3 (29kDa)	0.552876	0.470965	0.228641
218853_PM_s_at	MOSPD1	motile sperm domain containing 1	0.470866	0.469423	0.418516
201565_PM_s_at	ID2	inhibitor of DNA binding 2, dominant negative helix-loop-helix protein	0.914825	0.464094	0.169378
209017_PM_s_at	LONP1	lon peptidase 1, mitochondrial	0.423939	0.458058	0.462346
225688_PM_s_at	PHLDB2	pleckstrin homology-like domain, family B, member 2	0.532002	0.455117	0.255394
202575_PM_at	CRABP2	cellular retinoic acid binding protein 2	0.216289	0.453797	0.718445
202450_PM_s_at	CTSK	cathepsin K	0.378113	0.453143	2.13238
226001_PM_at	KLHL5	kelch-like 5 (Drosophila)	0.440938	0.451966	0.344931
213069_PM_at	HEG1	HEG homolog 1 (zebrafish)	0.431382	0.45184	0.269741
210461_PM_s_at	ABLIM1	actin binding LIM protein 1	0.392396	0.447653	0.394266
227705_PM_at	TCEAL7	transcription elongation factor A (SII)-like 7	0.440347	0.446776	0.410624
205924_PM_at	RAB3B	RAB3B, member RAS oncogene family	1.1366	0.446415	0.264497
242414_PM_at	QPRT	quinolinate phosphoribosyltransferase	0.301843	0.446237	0.463295
230204_PM_at	HAPLN1	hyaluronan and proteoglycan link protein 1	0.625789	0.446137	0.221624
229450_PM_at	IFIT3	interferon-induced protein with tetratricopeptide repeats 3	0.34576	0.44367	0.548595
227117_PM_at	---	---	0.366836	0.44189	0.592754
218980_PM_at	FHOD3	formin homology 2 domain containing 3	0.417682	0.441208	0.356954
212311_PM_at	KIAA0746	KIAA0746 protein	0.649963	0.441079	0.173704
1552457_PM_a_at	ADAMTSL1	ADAMTS-like 1	0.580656	0.439312	0.338983
219566_PM_at	PLEKHF1	pleckstrin homology domain containing, family F (with FYVE domain) member 1	0.322394	0.437496	1.12416
214985_PM_at	EXT1	exostoses (multiple) 1	0.514727	0.435033	0.247097
226789_PM_at	EMB	embigin homolog (mouse)	0.505848	0.434871	0.273847
223769_PM_x_at	HYI	hydroxypyruvate isomerase homolog (E. coli)	0.405913	0.433028	0.448115
226517_PM_at	BCAT1	branched chain aminotransferase 1, cytosolic	0.503156	0.43236	0.428503
228846_PM_at	MXD1	MAX dimerization protein 1	0.35351	0.431962	0.450494
221050_PM_s_at	GTPBP2	GTP binding protein 2	0.471026	0.430877	0.467784
235089_PM_at	FBXL20	F-box and leucine-rich repeat protein 20	0.438456	0.430712	0.468602
1554544_PM_a_at	MBP	myelin basic protein	0.329137	0.430395	0.446191
229202_PM_at	---	---	0.411008	0.429632	0.503108
204914_PM_s_at	SOX11	SRY (sex determining region Y)-box 11	0.569204	0.426775	0.172872
204881_PM_s_at	UGCG	UDP-glucose ceramide glucosyltransferase	0.504255	0.423822	0.235039
224937_PM_at	PTGFRN	prostaglandin F2 receptor negative regulator	0.449454	0.423336	0.324911
204915_PM_s_at	SOX11	SRY (sex determining region Y)-box 11	0.555865	0.42195	0.199637
218934_PM_s_at	HSPB7	heat shock 27kDa protein family, member 7 (cardiovascular)	1.52298	0.421215	0.365645
241337_PM_at	---	---	0.450833	0.420918	0.335188
228033_PM_at	E2F7	E2F transcription factor 7	0.589466	0.418311	0.14941
230175_PM_s_at	---	---	0.531441	0.416976	0.363486
224837_PM_at	FOXP1	forkhead box P1	0.4957	0.416403	0.46293
203504_PM_s_at	ABCA1	ATP-binding cassette, sub-family A (ABC1), member 1	0.216383	0.41543	0.317729
201167_PM_x_at	ARHGDIA	Rho GDP dissociation inhibitor (GDI) alpha	1.12941	0.41466	0.230761
240460_PM_at	---	---	0.361128	0.412893	0.191463
207993_PM_s_at	CHP	calcium binding protein P22	1.07292	0.409394	0.217031
219670_PM_at	BEND5	BEN domain containing 5	0.392478	0.409121	1.4744
209840_PM_s_at	LRRN3	leucine rich repeat neuronal 3	1.79001	0.408835	0.523011
1553565_PM_s_at	DDAH1	dimethylarginine dimethylaminohydrolase 1	1.50851	0.408255	0.348626
214866_PM_at	PLAUR	plasminogen activator, urokinase receptor	0.43698	0.406695	0.334546
205249_PM_at	EGR2	early growth response 2	0.359865	0.406657	8.02197
213931_PM_at	ID2 /// ID2B	inhibitor of DNA binding 2, dominant negative helix-loop-helix protein /// inhibitor of DNA binding 2B, dominant negative helix-loop-helix protein (pseudogene)	1.25504	0.406524	0.220986
224838_PM_at	FOXP1	forkhead box P1	0.517156	0.405557	0.442228
235471_PM_at	C10orf72	chromosome 10 open reading frame 72	0.416147	0.4054	0.470376
226550_PM_at	---	---	0.44895	0.405287	0.282091
202363_PM_at	SPOCK1	sparc/osteonectin, cwcv and kazal-like domains proteoglycan (testican) 1	0.485805	0.405155	0.463157
230275_PM_at	ARSI	arylsulfatase family, member I	0.495357	0.404435	0.408654
229800_PM_at	DCLK1	Doublecortin-like kinase 1	0.353537	0.40398	0.444604
232122_PM_s_at	VEPH1	ventricular zone expressed PH domain homolog 1 (zebrafish)	0.373638	0.403326	0.356134
205743_PM_at	STAC	SH3 and cysteine rich domain	0.520114	0.403022	0.293279
209369_PM_at	ANXA3	annexin A3	0.423576	0.402712	0.352929
227565_PM_at	---	---	0.407835	0.401991	0.294268
204268_PM_at	S100A2	S100 calcium binding protein A2	0.315953	0.401822	0.478431
228367_PM_at	ALPK2	alpha-kinase 2	0.505281	0.400726	0.235717
205792_PM_at	WISP2	WNT1 inducible signaling pathway protein 2	0.192382	0.400447	1.61462
228933_PM_at	NHS	Nance-Horan syndrome (congenital cataracts and dental anomalies)	0.505299	0.39774	0.242839
221765_PM_at	UGCG	UDP-glucose ceramide glucosyltransferase	0.482566	0.397409	0.21748
201566_PM_x_at	ID2	inhibitor of DNA binding 2, dominant negative helix-loop-helix protein	0.84137	0.397127	0.128357
200644_PM_at	MARCKSL1	MARCKS-like 1	0.476644	0.395537	0.242325
209760_PM_at	KIAA0922	KIAA0922	0.471977	0.394757	0.348562
207011_PM_s_at	PTK7	PTK7 protein tyrosine kinase 7	0.465134	0.394423	0.380665
218451_PM_at	CDCP1	CUB domain containing protein 1	0.42693	0.394369	0.405604
230099_PM_at	---	---	0.858871	0.393887	0.447399
203069_PM_at	SV2A	synaptic vesicle glycoprotein 2A	0.369544	0.392558	0.351465
209884_PM_s_at	SLC4A7	solute carrier family 4, sodium bicarbonate cotransporter, member 7	0.533811	0.392493	0.392938
226537_PM_at	HINT3	histidine triad nucleotide binding protein 3	0.408138	0.39205	0.34858
235256_PM_s_at	GALM	galactose mutarotase (aldose 1-epimerase)	0.441252	0.390823	0.433439
229221_PM_at	CD44	CD44 molecule (Indian blood group)	0.417344	0.390177	0.285537
209204_PM_at	LMO4	LIM domain only 4	0.419729	0.388999	0.409211
201431_PM_s_at	DPYSL3	dihydropyrimidinase-like 3	0.441725	0.388946	0.237722
205051_PM_s_at	KIT	v-kit Hardy-Zuckerman 4 feline sarcoma viral oncogene homolog	0.415555	0.388552	0.309474
230789_PM_at	ZNF280B	zinc finger protein 280B	0.488515	0.387297	0.285985
236599_PM_at	---	---	0.254716	0.385737	0.769276
221435_PM_x_at	HYI	hydroxypyruvate isomerase homolog (E. coli)	0.402768	0.384835	0.44447
222486_PM_s_at	ADAMTS1	ADAM metallopeptidase with thrombospondin type 1 motif, 1	0.532561	0.384605	0.270926
218692_PM_at	GOLSYN	Golgi-localized protein	0.291178	0.384441	0.445375
223622_PM_s_at	HYI	hydroxypyruvate isomerase homolog (E. coli)	0.367273	0.383508	0.407489
232297_PM_at	---	---	0.396977	0.383218	0.264202
228737_PM_at	TOX2	TOX high mobility group box family member 2	0.427927	0.383103	0.537091
209205_PM_s_at	LMO4	LIM domain only 4	0.388552	0.383089	0.413544
218651_PM_s_at	LARP6	La ribonucleoprotein domain family, member 6	0.368384	0.382973	0.626064
209682_PM_at	CBLB	Cas-Br-M (murine) ecotropic retroviral transforming sequence b	0.389385	0.380943	0.439358
241404_PM_at	---	---	0.489317	0.380697	0.388351
231911_PM_at	ERMN	ermin, ERM-like protein	0.328294	0.379168	0.348901
225464_PM_at	FRMD6	FERM domain containing 6	0.611372	0.378903	0.315517
211091_PM_s_at	NF2	neurofibromin 2 (merlin)	1.06453	0.378766	0.308778
218729_PM_at	LXN	latexin	0.381815	0.378536	0.235131
205234_PM_at	SLC16A4	solute carrier family 16, member 4 (monocarboxylic acid transporter 5)	0.267656	0.377676	0.25508
221865_PM_at	C9orf91	chromosome 9 open reading frame 91	0.349363	0.377524	0.543007
223599_PM_at	TRIM6	tripartite motif-containing 6	0.341419	0.375757	0.274203
205524_PM_s_at	HAPLN1	hyaluronan and proteoglycan link protein 1	0.652334	0.374918	0.217987
207876_PM_s_at	FLNC	filamin C, gamma	0.885982	0.374533	0.156757
205006_PM_s_at	NMT2	N-myristoyltransferase 2	0.466241	0.372604	0.307506
236565_PM_s_at	LARP6	La ribonucleoprotein domain family, member 6	0.511411	0.372473	0.375233
229382_PM_at	C1orf183	chromosome 1 open reading frame 183	0.280755	0.371301	0.396395
228635_PM_at	PCDH10	protocadherin 10	0.761005	0.370839	0.496338
238419_PM_at	PHLDB2	pleckstrin homology-like domain, family B, member 2	0.445106	0.370424	0.323488
212769_PM_at	TLE3	transducin-like enhancer of split 3 (E(sp1) homolog, Drosophila)	0.497292	0.369445	0.345054
204653_PM_at	TFAP2A	transcription factor AP-2 alpha (activating enhancer binding protein 2 alpha)	0.430969	0.369414	0.190446
239202_PM_at	---	---	1.03097	0.368428	0.258427
232080_PM_at	HECW2	HECT, C2 and WW domain containing E3 ubiquitin protein ligase 2	0.449755	0.367825	0.395631
228573_PM_at	ANTXR2	anthrax toxin receptor 2	0.483517	0.36716	0.439962
235548_PM_at	APCDD1L	adenomatosis polyposis coli down-regulated 1-like	0.466378	0.366328	0.551832
237215_PM_s_at	TFRC	transferrin receptor (p90, CD71)	0.479624	0.366166	0.334208
201761_PM_at	MTHFD2	methylenetetrahydrofolate dehydrogenase (NADP+ dependent) 2, methenyltetrahydrofolate cyclohydrolase	0.3102	0.365679	0.567001
1568868_PM_at	CYP27C1	cytochrome P450, family 27, subfamily C, polypeptide 1	0.527339	0.36563	0.352381
205251_PM_at	PER2	period homolog 2 (Drosophila)	0.336244	0.365467	0.368851
244561_PM_at	---	---	0.496669	0.364754	0.302024
206039_PM_at	RAB33A	RAB33A, member RAS oncogene family	0.344832	0.364726	0.388255
220817_PM_at	TRPC4	transient receptor potential cation channel, subfamily C, member 4	0.396799	0.363416	0.351876
230895_PM_at	HAPLN1	hyaluronan and proteoglycan link protein 1	0.664408	0.362171	0.225486
204879_PM_at	PDPN	podoplanin	0.381766	0.362083	0.42846
203440_PM_at	CDH2	cadherin 2, type 1, N-cadherin (neuronal)	0.566274	0.35989	0.343405
240402_PM_at	KIRREL3	kin of IRRE like 3 (Drosophila)	0.572368	0.358159	0.174067
223315_PM_at	NTN4	netrin 4	0.537337	0.358025	0.187736
205715_PM_at	BST1	bone marrow stromal cell antigen 1	0.517271	0.357869	0.269816
1558044_PM_s_at	EXOSC6	exosome component 6	0.410017	0.357844	0.533161
242546_PM_at	FLJ39632	hypothetical LOC642477	0.48135	0.357455	0.331184
215440_PM_s_at	BEX4	brain expressed, X-linked 4	0.429908	0.356879	0.391624
206448_PM_at	ZNF365	zinc finger protein 365	0.495744	0.356718	0.758634
221898_PM_at	PDPN	podoplanin	0.360082	0.354486	0.400884
235341_PM_at	DNAJC3	DnaJ (Hsp40) homolog, subfamily C, member 3	0.716945	0.354415	0.217627
227696_PM_at	LOC440345 /// LOC440354 /// LOC595101 /// LOC641298 /// SMG1	hypothetical protein LOC440345 /// PI-3-kinase-related kinase SMG-1 pseudogene /// PI-3-kinase-related kinase SMG-1 pseudogene /// SMG1 homolog, phosphatidylinositol 3-kinase-related kinase pseudogene /// SMG1 homolog, phosphatidylinositol 3-kinase-related kinase (C. elegans)	0.33268	0.352718	0.537126
235521_PM_at	HOXA3	homeobox A3	0.319128	0.351697	0.305165
227198_PM_at	AFF3	AF4/FMR2 family, member 3	0.357925	0.350008	0.371956
204203_PM_at	CEBPG	CCAAT/enhancer binding protein (C/EBP), gamma	0.404431	0.349903	0.423558
205381_PM_at	LRRC17	leucine rich repeat containing 17	0.196251	0.347943	1.01405
219134_PM_at	ELTD1	EGF, latrophilin and seven transmembrane domain containing 1	0.436569	0.3476	0.288828
227320_PM_at	FAM101A	family with sequence similarity 101, member A	0.370281	0.34734	0.375363
1558214_PM_s_at	CTNNA1	catenin (cadherin-associated protein), alpha 1, 102kDa	0.913491	0.346832	0.140125
213524_PM_s_at	G0S2	G0/G1switch 2	0.249606	0.346486	0.641976
204051_PM_s_at	SFRP4	secreted frizzled-related protein 4	0.12224	0.344956	0.207957
225314_PM_at	OCIAD2	OCIA domain containing 2	0.543903	0.344683	0.22141
201141_PM_at	GPNMB	glycoprotein (transmembrane) nmb	0.290266	0.344636	1.42254
229554_PM_at	---	---	0.321973	0.344575	0.414723
206215_PM_at	OPCML	opioid binding protein/cell adhesion molecule-like	0.330075	0.342966	0.30412
219749_PM_at	SH2D4A	SH2 domain containing 4A	0.467419	0.341193	0.276509
210512_PM_s_at	VEGFA	vascular endothelial growth factor A	0.20822	0.340756	0.622837
221584_PM_s_at	KCNMA1	potassium large conductance calcium-activated channel, subfamily M, alpha member 1	0.396861	0.340037	0.476693
226997_PM_at	ADAMTS12	ADAM metallopeptidase with thrombospondin type 1 motif, 12	0.474626	0.339644	0.133766
1552365_PM_at	SCIN	scinderin	0.384414	0.337108	0.393441
210990_PM_s_at	LAMA4	laminin, alpha 4	0.419675	0.336723	0.267432
204726_PM_at	CDH13	cadherin 13, H-cadherin (heart)	0.508038	0.336366	0.318253
231894_PM_at	---	---	0.301008	0.335606	0.489019
1554018_PM_at	GPNMB	glycoprotein (transmembrane) nmb	0.173709	0.335137	1.13283
219501_PM_at	ENOX1	ecto-NOX disulfide-thiol exchanger 1	0.292265	0.335123	0.277037
AFFX-M27830_5_at	---	---	1.21481	0.334871	0.210296
227014_PM_at	ASPHD2	aspartate beta-hydroxylase domain containing 2	0.442153	0.332304	0.305512
206584_PM_at	LY96	lymphocyte antigen 96	0.2796	0.332271	0.520065
210602_PM_s_at	CDH6	cadherin 6, type 2, K-cadherin (fetal kidney)	0.474638	0.331899	0.274192
222773_PM_s_at	GALNT12	UDP-N-acetyl-alpha-D-galactosamine:polypeptide N-acetylgalactosaminyltransferase 12 (GalNAc-T12)	0.364517	0.33156	0.390429
205206_PM_at	KAL1	Kallmann syndrome 1 sequence	0.262176	0.331332	0.167057
225864_PM_at	FAM84B	family with sequence similarity 84, member B	0.395804	0.331325	0.316704
227900_PM_at	CBLB	Cas-Br-M (murine) ecotropic retroviral transforming sequence b	0.278899	0.331308	0.376441
219523_PM_s_at	ODZ3	odz, odd Oz/ten-m homolog 3 (Drosophila)	0.368946	0.330227	0.348048
223287_PM_s_at	FOXP1	forkhead box P1	0.486034	0.329765	0.297948
231882_PM_at	DUXAP10 /// FLJ39632	double homeobox A pseudogene 10 /// hypothetical LOC642477	0.57809	0.329692	0.348556
201397_PM_at	PHGDH	phosphoglycerate dehydrogenase	0.140546	0.329409	0.370305
204194_PM_at	BACH1	BTB and CNC homology 1, basic leucine zipper transcription factor 1	0.329208	0.328172	0.400196
1558105_PM_a_at	---	---	0.509076	0.326958	0.254762
204656_PM_at	SHB	Src homology 2 domain containing adaptor protein B	0.537899	0.326455	0.254069
226013_PM_at	TRAK1	trafficking protein, kinesin binding 1	0.545426	0.326233	0.382395
212942_PM_s_at	KIAA1199	KIAA1199	0.802364	0.325073	0.245009
205738_PM_s_at	FABP3	fatty acid binding protein 3, muscle and heart (mammary-derived growth inhibitor)	0.234751	0.32499	0.452024
212865_PM_s_at	COL14A1	collagen, type XIV, alpha 1	0.34946	0.324212	0.2207
205122_PM_at	TMEFF1	transmembrane protein with EGF-like and two follistatin-like domains 1	0.430867	0.323683	0.426182
222903_PM_s_at	CPEB1	cytoplasmic polyadenylation element binding protein 1	0.302134	0.323603	0.340212
229354_PM_at	AHRR	aryl-hydrocarbon receptor repressor	0.623533	0.323357	0.241631
211708_PM_s_at	SCD	stearoyl-CoA desaturase (delta-9-desaturase)	0.246014	0.322499	0.315211
214074_PM_s_at	CTTN	cortactin	0.92003	0.32192	0.265705
229844_PM_at	---	---	0.399317	0.321843	0.342314
205413_PM_at	MPPED2	metallophosphoesterase domain containing 2	0.437789	0.321824	0.250554
207303_PM_at	PDE1C	phosphodiesterase 1C, calmodulin-dependent 70kDa	0.478179	0.320721	0.245464
214755_PM_at	UAP1L1	UDP-N-acteylglucosamine pyrophosphorylase 1-like 1	0.300733	0.320613	1.09021
227828_PM_s_at	FAM176A	family with sequence similarity 176, member A	0.489041	0.319387	0.280825
213909_PM_at	LRRC15	leucine rich repeat containing 15	0.113356	0.317892	1.08586
235666_PM_at	---	---	0.960949	0.317856	0.272222
236344_PM_at	PDE1C	phosphodiesterase 1C, calmodulin-dependent 70kDa	0.504973	0.317349	0.358068
202998_PM_s_at	LOXL2	lysyl oxidase-like 2	0.448162	0.317176	0.427216
200965_PM_s_at	ABLIM1	actin binding LIM protein 1	0.31088	0.316969	0.292158
205870_PM_at	BDKRB2	bradykinin receptor B2	0.469135	0.316795	0.219011
202350_PM_s_at	MATN2	matrilin 2	0.316953	0.316261	0.601885
228740_PM_at	---	---	0.378197	0.315882	0.375538
37028_PM_at	PPP1R15A	protein phosphatase 1, regulatory (inhibitor) subunit 15A	0.415149	0.315252	0.483953
242629_PM_at	---	---	1.02772	0.314684	0.199099
232484_PM_at	---	---	0.440523	0.313735	0.376398
213942_PM_at	MEGF6	multiple EGF-like-domains 6	0.500699	0.313075	0.213914
1561615_PM_s_at	SLC8A1	solute carrier family 8 (sodium/calcium exchanger), member 1	0.654611	0.312951	0.372086
214164_PM_x_at	CA12	carbonic anhydrase XII	0.288752	0.312202	0.451068
218627_PM_at	DRAM1	DNA-damage regulated autophagy modulator 1	0.373437	0.311812	0.342531
214285_PM_at	FABP3	fatty acid binding protein 3, muscle and heart (mammary-derived growth inhibitor)	0.255686	0.311735	0.458039
211478_PM_s_at	DPP4	dipeptidyl-peptidase 4	0.340026	0.311548	0.3005
223484_PM_at	C15orf48	chromosome 15 open reading frame 48	0.28913	0.311413	0.35434
201995_PM_at	EXT1	exostoses (multiple) 1	0.548996	0.310995	0.264595
221854_PM_at	PKP1	plakophilin 1 (ectodermal dysplasia/skin fragility syndrome)	0.387388	0.31071	0.373652
205194_PM_at	PSPH	phosphoserine phosphatase	0.23569	0.309079	0.552262
204422_PM_s_at	FGF2	fibroblast growth factor 2 (basic)	0.40242	0.308433	0.236256
241726_PM_at	---	---	0.396311	0.308012	0.256235
219064_PM_at	ITIH5	inter-alpha (globulin) inhibitor H5	0.286761	0.306623	0.333435
226989_PM_at	RGMB	RGM domain family, member B	0.371536	0.306384	0.313217
218613_PM_at	PSD3	pleckstrin and Sec7 domain containing 3	0.347825	0.306273	0.266548
237248_PM_at	PDE11A	phosphodiesterase 11A	0.308935	0.306149	0.355957
223618_PM_at	FMN2	formin 2	0.905703	0.30516	0.223475
237206_PM_at	MYOCD	myocardin	0.425696	0.304693	0.263011
221985_PM_at	KLHL24	kelch-like 24 (Drosophila)	0.692915	0.304394	0.75701
234976_PM_x_at	SLC4A5	Solute carrier family 4, sodium bicarbonate cotransporter, member 5	0.279753	0.303752	0.418038
235504_PM_at	GREM2	gremlin 2, cysteine knot superfamily, homolog (Xenopus laevis)	0.436562	0.303197	0.292332
215867_PM_x_at	CA12	carbonic anhydrase XII	0.289417	0.301715	0.450322
203355_PM_s_at	PSD3	pleckstrin and Sec7 domain containing 3	0.3208	0.300785	0.273679
217127_PM_at	CTH	cystathionase (cystathionine gamma-lyase)	0.207246	0.300652	0.386745
211173_PM_at	CCKAR	cholecystokinin A receptor	0.348201	0.30031	0.277655
210762_PM_s_at	DLC1	deleted in liver cancer 1	0.620376	0.300218	0.306705
1559033_PM_at	LOC255167	hypothetical LOC255167	0.488689	0.300035	0.19811
204135_PM_at	FILIP1L	filamin A interacting protein 1-like	0.770802	0.29999	0.127581
228298_PM_at	FAM113B	family with sequence similarity 113, member B	0.64499	0.298824	0.557662
219308_PM_s_at	AK5	adenylate kinase 5	0.317429	0.298786	0.309533
239201_PM_at	PFTK2	PFTAIRE protein kinase 2	0.774375	0.298749	0.208358
229581_PM_at	ELFN1	extracellular leucine-rich repeat and fibronectin type III domain containing 1	0.440499	0.298602	0.370438
244503_PM_at	---	---	0.807222	0.297785	0.297462
209435_PM_s_at	ARHGEF2	Rho/Rac guanine nucleotide exchange factor (GEF) 2	0.284936	0.297282	0.38673
1553142_PM_at	C13orf31	chromosome 13 open reading frame 31	0.270565	0.297258	0.262659
213832_PM_at	KCND3	potassium voltage-gated channel, Shal-related subfamily, member 3	0.304295	0.297131	0.218938
209822_PM_s_at	VLDLR	very low density lipoprotein receptor	0.208218	0.296577	0.39583
216869_PM_at	PDE1C	phosphodiesterase 1C, calmodulin-dependent 70kDa	0.581157	0.296563	0.256263
201829_PM_at	NET1	neuroepithelial cell transforming 1	0.414755	0.296304	0.360521
228438_PM_at	LOC100132891	Hypothetical protein LOC100132891	0.24811	0.296263	0.367892
214452_PM_at	BCAT1	branched chain aminotransferase 1, cytosolic	0.289882	0.295955	0.220396
1555471_PM_a_at	FMN2	formin 2	1.07215	0.294399	0.171634
235004_PM_at	RBM24	RNA binding motif protein 24	0.418897	0.291393	0.258698
204401_PM_at	KCNN4	potassium intermediate/small conductance calcium-activated channel, subfamily N, member 4	0.354094	0.291106	0.321879
230147_PM_at	F2RL2	coagulation factor II (thrombin) receptor-like 2	0.366971	0.291056	0.214512
205123_PM_s_at	TMEFF1	transmembrane protein with EGF-like and two follistatin-like domains 1	0.403201	0.290154	0.31173
202986_PM_at	ARNT2	aryl-hydrocarbon receptor nuclear translocator 2	0.630169	0.289905	0.310331
204337_PM_at	RGS4	regulator of G-protein signaling 4	0.45685	0.289324	0.521751
234994_PM_at	TMEM200A	transmembrane protein 200A	0.539348	0.289316	0.318815
202158_PM_s_at	CUGBP2	CUG triplet repeat, RNA binding protein 2	0.289673	0.288853	0.391312
239650_PM_at	NCKAP5	NCK-associated protein 5	0.335016	0.288256	0.295754
212822_PM_at	HEG1	HEG homolog 1 (zebrafish)	0.361883	0.287705	0.160777
213281_PM_at	LOC100288387	similar to c-jun	0.379213	0.28764	0.456877
201287_PM_s_at	SDC1	syndecan 1	0.311677	0.286998	0.245152
226302_PM_at	ATP8B1	ATPase, class I, type 8B, member 1	0.555123	0.286019	0.315293
206307_PM_s_at	FOXD1	forkhead box D1	0.428522	0.285966	0.34968
235489_PM_at	RHOJ	ras homolog gene family, member J	0.234498	0.284704	0.290463
209738_PM_x_at	PSG6	pregnancy specific beta-1-glycoprotein 6	0.463391	0.284586	0.268849
209582_PM_s_at	CD200	CD200 molecule	0.356389	0.283833	0.200028
200629_PM_at	WARS	tryptophanyl-tRNA synthetase	0.207565	0.282747	0.299172
200628_PM_s_at	WARS	tryptophanyl-tRNA synthetase	0.25948	0.281192	0.278566
228360_PM_at	LYPD6B	LY6/PLAUR domain containing 6B	0.861357	0.280607	0.123003
237939_PM_at	EPHA5	EPH receptor A5	0.295146	0.280314	0.225325
235518_PM_at	SLC8A1	solute carrier family 8 (sodium/calcium exchanger), member 1	0.708722	0.279487	0.147294
244091_PM_at	---	---	0.454147	0.279379	0.209398
210310_PM_s_at	FGF5	fibroblast growth factor 5	1.0382	0.279136	0.206765
205533_PM_s_at	CDH6	cadherin 6, type 2, K-cadherin (fetal kidney)	0.415362	0.279121	0.265448
223196_PM_s_at	SESN2	sestrin 2	0.224626	0.278515	0.429273
209765_PM_at	ADAM19	ADAM metallopeptidase domain 19 (meltrin beta)	0.655366	0.278131	0.15775
203665_PM_at	HMOX1	heme oxygenase (decycling) 1	0.532297	0.277185	0.396547
229759_PM_s_at	VEPH1	ventricular zone expressed PH domain homolog 1 (zebrafish)	0.504098	0.276954	0.18012
208378_PM_x_at	FGF5	fibroblast growth factor 5	1.18411	0.276392	0.216191
201430_PM_s_at	DPYSL3	dihydropyrimidinase-like 3	0.349983	0.274954	0.144972
237372_PM_at	---	---	0.437082	0.274397	0.249654
205405_PM_at	SEMA5A	sema domain, seven thrombospondin repeats (type 1 and type 1-like), transmembrane domain (TM) and short cytoplasmic domain, (semaphorin) 5A	0.39855	0.27405	0.408649
214390_PM_s_at	BCAT1	branched chain aminotransferase 1, cytosolic	0.26195	0.273757	0.1994
223195_PM_s_at	SESN2	sestrin 2	0.202855	0.27234	0.43958
204421_PM_s_at	FGF2	fibroblast growth factor 2 (basic)	0.368724	0.271921	0.285859
225842_PM_at	PHLDA1	pleckstrin homology-like domain, family A, member 1	0.151611	0.270784	0.477407
AFFX-HUMISGF3A/M97935_5_at	STAT1	signal transducer and activator of transcription 1, 91kDa	0.435224	0.270312	0.167804
201116_PM_s_at	CPE	carboxypeptidase E	0.364592	0.270099	0.423905
207629_PM_s_at	ARHGEF2	Rho/Rac guanine nucleotide exchange factor (GEF) 2	0.327769	0.269789	0.347508
238452_PM_at	FCRLB	Fc receptor-like B	0.531478	0.268951	0.233931
227140_PM_at	---	---	0.474843	0.268452	0.394771
203423_PM_at	RBP1	retinol binding protein 1, cellular	0.288044	0.266655	0.259985
229228_PM_at	CREB5	cAMP responsive element binding protein 5	0.335515	0.2655	0.267625
239218_PM_at	---	---	0.555481	0.265477	0.216753
1552275_PM_s_at	PXK	PX domain containing serine/threonine kinase	0.260277	0.26465	0.433418
202016_PM_at	MEST	mesoderm specific transcript homolog (mouse)	0.145999	0.264635	0.161871
203441_PM_s_at	CDH2	cadherin 2, type 1, N-cadherin (neuronal)	0.494746	0.26457	0.238516
217998_PM_at	LOC100289208 /// PHLDA1	hypothetical protein LOC100289208 /// pleckstrin homology-like domain, family A, member 1	0.219189	0.264123	0.482235
202156_PM_s_at	CUGBP2	CUG triplet repeat, RNA binding protein 2	0.328856	0.263919	0.360002
218788_PM_s_at	SMYD3	SET and MYND domain containing 3	0.213123	0.26374	0.281833
213169_PM_at	SEMA5A	sema domain, seven thrombospondin repeats (type 1 and type 1-like), transmembrane domain (TM) and short cytoplasmic domain, (semaphorin) 5A	0.336729	0.26303	0.42404
204926_PM_at	INHBA	inhibin, beta A	0.469502	0.262109	0.318647
201422_PM_at	IFI30	interferon, gamma-inducible protein 30	0.359612	0.260883	0.162238
1553972_PM_a_at	CBS	cystathionine-beta-synthase	0.204992	0.260518	0.397436
229427_PM_at	SEMA5A	sema domain, seven thrombospondin repeats (type 1 and type 1-like), transmembrane domain (TM) and short cytoplasmic domain, (semaphorin) 5A	0.328982	0.259677	0.288146
200636_PM_s_at	PTPRF	protein tyrosine phosphatase, receptor type, F	0.32258	0.25924	0.201514
206382_PM_s_at	BDNF	brain-derived neurotrophic factor	0.586929	0.258753	0.174305
41660_PM_at	CELSR1	cadherin, EGF LAG seven-pass G-type receptor 1 (flamingo homolog, Drosophila)	0.316677	0.258146	0.262087
233234_PM_at	KCTD16	potassium channel tetramerisation domain containing 16	0.473244	0.258029	0.262682
202997_PM_s_at	LOXL2	lysyl oxidase-like 2	0.384141	0.257572	0.275209
212143_PM_s_at	IGFBP3	insulin-like growth factor binding protein 3	0.590149	0.256968	0.301044
223614_PM_at	MMP16	matrix metallopeptidase 16 (membrane-inserted)	0.215113	0.256651	0.12269
1553141_PM_at	C13orf31	chromosome 13 open reading frame 31	0.26599	0.256514	0.243871
227340_PM_s_at	RGMB	RGM domain family, member B	0.366228	0.256455	0.255551
213816_PM_s_at	MET	met proto-oncogene (hepatocyte growth factor receptor)	0.480391	0.256324	0.159546
206085_PM_s_at	CTH	cystathionase (cystathionine gamma-lyase)	0.198153	0.254438	0.292323
205596_PM_s_at	SMURF2	SMAD specific E3 ubiquitin protein ligase 2	0.410413	0.253792	0.262757
209946_PM_at	VEGFC	vascular endothelial growth factor C	0.643894	0.253298	0.309831
225817_PM_at	CGNL1	cingulin-like 1	0.303928	0.253111	0.46348
202157_PM_s_at	CUGBP2	CUG triplet repeat, RNA binding protein 2	0.259434	0.252594	0.380147
215856_PM_at	SIGLEC15	sialic acid binding Ig-like lectin 15	0.65366	0.250313	0.286826
1555788_PM_a_at	TRIB3	tribbles homolog 3 (Drosophila)	0.207382	0.248712	0.350206
204794_PM_at	DUSP2	dual specificity phosphatase 2	0.498399	0.248553	0.188906
207733_PM_x_at	PSG9	pregnancy specific beta-1-glycoprotein 9	0.42781	0.247956	0.212522
229055_PM_at	GPR68	G protein-coupled receptor 68	0.346851	0.247887	0.373394
212171_PM_x_at	VEGFA	vascular endothelial growth factor A	0.180754	0.247794	0.505145
237217_PM_at	ADAMTSL1	ADAMTS-like 1	0.392566	0.24607	0.179287
222780_PM_s_at	BAALC	brain and acute leukemia, cytoplasmic	0.322546	0.244576	0.306288
212940_PM_at	COL6A1	collagen, type VI, alpha 1	0.695173	0.244146	0.116862
201464_PM_x_at	JUN	jun oncogene	0.387491	0.243204	0.429367
203963_PM_at	CA12	carbonic anhydrase XII	0.25719	0.241895	0.357593
230799_PM_at	LOC100134259	similar to hCG1987718	0.266453	0.241537	0.26189
227337_PM_at	ANKRD37	ankyrin repeat domain 37	0.193174	0.241156	0.424994
240509_PM_s_at	GREM2	gremlin 2, cysteine knot superfamily, homolog (Xenopus laevis)	0.518034	0.240034	0.228224
239909_PM_at	ADAMTSL1	ADAMTS-like 1	0.357985	0.239662	0.166071
204339_PM_s_at	RGS4	regulator of G-protein signaling 4	0.445622	0.23954	0.397426
230183_PM_at	EXT1	exostoses (multiple) 1	0.554228	0.23917	0.223702
203354_PM_s_at	PSD3	pleckstrin and Sec7 domain containing 3	0.319413	0.238758	0.244171
206118_PM_at	STAT4	signal transducer and activator of transcription 4	0.190207	0.235567	0.0698563
209921_PM_at	SLC7A11	solute carrier family 7, (cationic amino acid transporter, y+ system) member 11	0.0850998	0.234522	0.319838
202936_PM_s_at	SOX9	SRY (sex determining region Y)-box 9	0.279606	0.233886	0.415089
230090_PM_at	LOC100287032	similar to hCG2006445	0.315926	0.233269	0.302056
226777_PM_at	---	---	0.2676	0.233088	0.206778
230820_PM_at	---	---	0.365761	0.232079	0.252818
204508_PM_s_at	CA12	carbonic anhydrase XII	0.233363	0.231039	0.367139
209583_PM_s_at	CD200	CD200 molecule	0.275924	0.230729	0.0930043
202628_PM_s_at	SERPINE1	serpin peptidase inhibitor, clade E (nexin, plasminogen activator inhibitor type 1), member 1	0.651143	0.229488	0.682119
1563933_PM_a_at	PLD5	phospholipase D family, member 5	0.781829	0.229249	0.0414088
206814_PM_at	NGF	nerve growth factor (beta polypeptide)	0.276849	0.227942	0.242401
210612_PM_s_at	SYNJ2	synaptojanin 2	0.467057	0.224456	0.194693
207604_PM_s_at	SLC4A7	solute carrier family 4, sodium bicarbonate cotransporter, member 7	0.508567	0.224131	0.214785
213711_PM_at	KRT81	keratin 81	0.396703	0.223199	0.268343
219558_PM_at	ATP13A3	ATPase type 13A3	0.683431	0.223039	0.250317
227489_PM_at	SMURF2	SMAD specific E3 ubiquitin protein ligase 2	0.387889	0.221861	0.267387
217996_PM_at	PHLDA1	pleckstrin homology-like domain, family A, member 1	0.167829	0.221199	0.360919
203716_PM_s_at	DPP4	dipeptidyl-peptidase 4	0.413739	0.220593	0.305951
201578_PM_at	PODXL	podocalyxin-like	0.950058	0.220456	0.249429
211527_PM_x_at	VEGFA	vascular endothelial growth factor A	0.148928	0.22004	0.479231
208483_PM_x_at	KRT33A	keratin 33A	0.361174	0.218028	0.218066
228750_PM_at	---	---	0.260917	0.217983	0.14708
201830_PM_s_at	NET1	neuroepithelial cell transforming 1	0.346611	0.217864	0.236137
212444_PM_at	---	---	0.470863	0.216291	0.130444
204913_PM_s_at	SOX11	SRY (sex determining region Y)-box 11	0.524208	0.215773	0.101076
1554966_PM_a_at	FILIP1L	filamin A interacting protein 1-like	0.862561	0.21566	0.116151
221583_PM_s_at	KCNMA1	potassium large conductance calcium-activated channel, subfamily M, alpha member 1	0.337509	0.214477	0.274555
213790_PM_at	ADAM12	ADAM metallopeptidase domain 12	0.255034	0.214352	0.166728
207147_PM_at	DLX2	distal-less homeobox 2	0.689255	0.214346	0.19029
206924_PM_at	IL11	interleukin 11	0.272108	0.212939	0.302983
200924_PM_s_at	SLC3A2	solute carrier family 3 (activators of dibasic and neutral amino acid transport), member 2	0.218424	0.212684	0.510745
225768_PM_at	NR1D2	nuclear receptor subfamily 1, group D, member 2	0.271388	0.21242	0.358143
210601_PM_at	CDH6	cadherin 6, type 2, K-cadherin (fetal kidney)	0.319684	0.212131	0.178956
200637_PM_s_at	PTPRF	protein tyrosine phosphatase, receptor type, F	0.343787	0.212106	0.202855
213865_PM_at	DCBLD2	discoidin, CUB and LCCL domain containing 2	0.433814	0.211976	0.215345
226847_PM_at	FST	follistatin	0.3249	0.209603	0.551223
205266_PM_at	LIF	leukemia inhibitory factor (cholinergic differentiation factor)	0.29537	0.206621	0.314936
225407_PM_at	MBP	myelin basic protein	0.17876	0.206276	0.24468
228964_PM_at	PRDM1	PR domain containing 1, with ZNF domain	0.242405	0.20536	0.13511
201042_PM_at	TGM2	transglutaminase 2 (C polypeptide, protein-glutamine-gamma-glutamyltransferase)	0.593086	0.203204	0.0743146
204338_PM_s_at	RGS4	regulator of G-protein signaling 4	0.454243	0.202982	0.346765
224399_PM_at	PDCD1LG2	programmed cell death 1 ligand 2	0.282689	0.202676	0.198578
204948_PM_s_at	FST	follistatin	0.31346	0.20033	0.510061
226869_PM_at	MEGF6	multiple EGF-like-domains 6	0.670098	0.199949	0.114602
202952_PM_s_at	ADAM12	ADAM metallopeptidase domain 12	0.255523	0.199941	0.160153
210136_PM_at	MBP	myelin basic protein	0.129507	0.198897	0.212056
206481_PM_s_at	LDB2	LIM domain binding 2	0.216125	0.198522	0.184338
1557458_PM_s_at	SHB	Src homology 2 domain containing adaptor protein B	0.463484	0.19837	0.166392
202627_PM_s_at	SERPINE1	serpin peptidase inhibitor, clade E (nexin, plasminogen activator inhibitor type 1), member 1	0.695379	0.197561	0.584248
214803_PM_at	---	---	0.386139	0.197163	0.0489869
209032_PM_s_at	CADM1	cell adhesion molecule 1	0.22746	0.196311	0.206126
209383_PM_at	DDIT3 /// NR1H3	DNA-damage-inducible transcript 3 /// nuclear receptor subfamily 1, group H, member 3	0.132519	0.196274	0.637339
239367_PM_at	BDNF	brain-derived neurotrophic factor	0.527735	0.19619	0.180343
219874_PM_at	SLC12A8	solute carrier family 12 (potassium/chloride transporters), member 8	0.124478	0.195612	0.128772
203854_PM_at	CFI	complement factor I	0.192125	0.195006	0.131329
232020_PM_at	SMURF2	SMAD specific E3 ubiquitin protein ligase 2	0.318202	0.194986	0.237196
201465_PM_s_at	JUN	jun oncogene	0.339806	0.193983	0.342485
218380_PM_at	LOC728392 /// NLRP1	hypothetical protein LOC728392 /// NLR family, pyrin domain containing 1	0.251676	0.193449	0.237136
222862_PM_s_at	AK5	adenylate kinase 5	0.365212	0.193447	0.265832
219959_PM_at	MOCOS	molybdenum cofactor sulfurase	0.145085	0.192171	0.201264
217678_PM_at	SLC7A11	solute carrier family 7, (cationic amino acid transporter, y+ system) member 11	0.0789933	0.191521	0.261457
212828_PM_at	SYNJ2	synaptojanin 2	0.435705	0.190738	0.182393
210511_PM_s_at	INHBA	inhibin, beta A	0.373139	0.190682	0.267617
218332_PM_at	BEX1	brain expressed, X-linked 1	0.867174	0.188339	0.0535737
235944_PM_at	HMCN1	hemicentin 1	0.310801	0.188084	0.293571
227339_PM_at	RGMB	RGM domain family, member B	0.264927	0.187873	0.158481
203108_PM_at	GPRC5A	G protein-coupled receptor, family C, group 5, member A	0.382341	0.184452	0.0713351
235236_PM_at	LOC100131897	Uncharacterized protein LOC100131897	0.384335	0.182209	0.359515
229585_PM_at	ADAMTSL1	ADAMTS-like 1	0.2849	0.182132	0.0922253
223062_PM_s_at	PSAT1	phosphoserine aminotransferase 1	0.0710427	0.181369	0.395428
218885_PM_s_at	GALNT12	UDP-N-acetyl-alpha-D-galactosamine:polypeptide N-acetylgalactosaminyltransferase 12 (GalNAc-T12)	0.170316	0.180694	0.182821
201466_PM_s_at	JUN	jun oncogene	0.278387	0.177573	0.333016
227475_PM_at	FOXQ1	forkhead box Q1	0.142853	0.176658	0.640535
202847_PM_at	PCK2	phosphoenolpyruvate carboxykinase 2 (mitochondrial)	0.12849	0.17566	0.296654
202935_PM_s_at	SOX9	SRY (sex determining region Y)-box 9	0.208188	0.17496	0.264418
1560208_PM_at	---	---	0.258189	0.174901	0.13336
210026_PM_s_at	CARD10	caspase recruitment domain family, member 10	0.324818	0.174762	0.101843
202207_PM_at	ARL4C	ADP-ribosylation factor-like 4C	0.108717	0.173297	0.344539
201631_PM_s_at	IER3	immediate early response 3	0.199299	0.172071	0.196929
208230_PM_s_at	NRG1	neuregulin 1	0.233887	0.171371	0.167241
204614_PM_at	SERPINB2	serpin peptidase inhibitor, clade B (ovalbumin), member 2	0.166161	0.169724	0.184412
205532_PM_s_at	CDH6	cadherin 6, type 2, K-cadherin (fetal kidney)	0.309805	0.169055	0.064318
202834_PM_at	AGT	angiotensinogen (serpin peptidase inhibitor, clade A, member 8)	0.166707	0.168702	0.546234
207345_PM_at	FST	follistatin	0.258412	0.168529	0.399687
236313_PM_at	CDKN2B	cyclin-dependent kinase inhibitor 2B (p15, inhibits CDK4)	0.233152	0.16801	0.564487
205832_PM_at	CPA4	carboxypeptidase A4	0.0949506	0.16784	0.0873799
203946_PM_s_at	ARG2	arginase, type II	0.180111	0.167766	0.242805
209687_PM_at	CXCL12	chemokine (C-X-C motif) ligand 12 (stromal cell-derived factor 1)	0.306044	0.167228	0.053633
220892_PM_s_at	PSAT1	phosphoserine aminotransferase 1	0.0635633	0.166504	0.502749
212816_PM_s_at	CBS	cystathionine-beta-synthase	0.163695	0.16632	0.291988
237411_PM_at	ADAMTS6	ADAM metallopeptidase with thrombospondin type 1 motif, 6	0.196046	0.165416	0.192898
217997_PM_at	PHLDA1	pleckstrin homology-like domain, family A, member 1	0.130789	0.163177	0.319583
205856_PM_at	SLC14A1	solute carrier family 14 (urea transporter), member 1 (Kidd blood group)	0.587002	0.162864	0.420031
210513_PM_s_at	VEGFA	vascular endothelial growth factor A	0.124233	0.162465	0.442464
221019_PM_s_at	COLEC12	collectin sub-family member 12	0.189879	0.161934	0.128739
206290_PM_s_at	RGS7	regulator of G-protein signaling 7	0.190822	0.161676	0.162895
209800_PM_at	KRT16	keratin 16	0.193332	0.160746	0.718586
201340_PM_s_at	ENC1	ectodermal-neural cortex (with BTB-like domain)	0.751317	0.159866	0.218752
205047_PM_s_at	ASNS	asparagine synthetase	0.0944582	0.159749	0.286422
210735_PM_s_at	CA12	carbonic anhydrase XII	0.254528	0.158342	0.251279
200635_PM_s_at	PTPRF	protein tyrosine phosphatase, receptor type, F	0.337545	0.158021	0.108656
203180_PM_at	ALDH1A3	aldehyde dehydrogenase 1 family, member A3	0.259007	0.157917	0.1911
211741_PM_x_at	PSG3	pregnancy specific beta-1-glycoprotein 3	0.373525	0.157434	0.0758566
244623_PM_at	KCNQ5	potassium voltage-gated channel, KQT-like subfamily, member 5	0.218756	0.154491	0.113005
203399_PM_x_at	PSG3	pregnancy specific beta-1-glycoprotein 3	0.407082	0.151322	0.0996195
205421_PM_at	SLC22A3	solute carrier family 22 (extraneuronal monoamine transporter), member 3	0.144147	0.15112	0.17882
209594_PM_x_at	PSG9	pregnancy specific beta-1-glycoprotein 9	0.38302	0.146501	0.0568778
206392_PM_s_at	RARRES1	retinoic acid receptor responder (tazarotene induced) 1	0.177964	0.146231	0.121063
219179_PM_at	DACT1	dapper, antagonist of beta-catenin, homolog 1 (Xenopus laevis)	0.411808	0.146096	0.232815
217999_PM_s_at	PHLDA1	pleckstrin homology-like domain, family A, member 1	0.121249	0.144642	0.261198
230493_PM_at	SHISA2	shisa homolog 2 (Xenopus laevis)	0.156086	0.143258	0.160873
203666_PM_at	CXCL12	chemokine (C-X-C motif) ligand 12 (stromal cell-derived factor 1)	0.28808	0.143129	0.0617215
202208_PM_s_at	ARL4C	ADP-ribosylation factor-like 4C	0.113882	0.141926	0.257985
215543_PM_s_at	LARGE	like-glycosyltransferase	0.201057	0.13976	0.193682
218145_PM_at	TRIB3	tribbles homolog 3 (Drosophila)	0.103268	0.139355	0.393102
220794_PM_at	GREM2	gremlin 2, cysteine knot superfamily, homolog (Xenopus laevis)	0.503524	0.1389	0.0990469
218899_PM_s_at	BAALC	brain and acute leukemia, cytoplasmic	0.208189	0.138605	0.19885
202206_PM_at	ARL4C	ADP-ribosylation factor-like 4C	0.086273	0.134924	0.262843
203717_PM_at	DPP4	dipeptidyl-peptidase 4	0.22723	0.1342	0.127539
204830_PM_x_at	PSG5	pregnancy specific beta-1-glycoprotein 5	0.404617	0.132416	0.0550034
204471_PM_at	GAP43	growth associated protein 43	0.151332	0.130414	0.107022
221872_PM_at	RARRES1	retinoic acid receptor responder (tazarotene induced) 1	0.202104	0.130315	0.117938
209396_PM_s_at	CHI3L1	chitinase 3-like 1 (cartilage glycoprotein-39)	0.0675679	0.129529	0.32123
216250_PM_s_at	LPXN	leupaxin	0.0992632	0.128903	0.128158
236044_PM_at	PPAPDC1A	phosphatidic acid phosphatase type 2 domain containing 1A	0.297221	0.127434	0.114351
209395_PM_at	CHI3L1	chitinase 3-like 1 (cartilage glycoprotein-39)	0.0635775	0.125837	0.302679
227314_PM_at	ITGA2	integrin, alpha 2 (CD49B, alpha 2 subunit of VLA-2 receptor)	0.151826	0.124696	0.110728
219270_PM_at	CHAC1	ChaC, cation transport regulator homolog 1 (E. coli)	0.11306	0.124352	0.50986
214844_PM_s_at	DOK5	docking protein 5	0.253806	0.123311	0.239604
219935_PM_at	ADAMTS5	ADAM metallopeptidase with thrombospondin type 1 motif, 5	0.212209	0.123279	0.0324723
1554685_PM_a_at	KIAA1199	KIAA1199	0.515978	0.120684	0.0959301
1554863_PM_s_at	DOK5	docking protein 5	0.232631	0.120441	0.20719
218468_PM_s_at	GREM1	gremlin 1, cysteine knot superfamily, homolog (Xenopus laevis)	0.75711	0.118636	0.0384545
204774_PM_at	EVI2A	ecotropic viral integration site 2A	0.0585608	0.116089	0.862372
228237_PM_at	PAPPA2	pappalysin 2	0.142356	0.114939	0.128466
230831_PM_at	FRMD5	FERM domain containing 5	0.124543	0.11059	0.185242
229151_PM_at	SLC14A1	solute carrier family 14 (urea transporter), member 1 (Kidd blood group)	0.476823	0.110112	0.383195
218469_PM_at	GREM1	gremlin 1, cysteine knot superfamily, homolog (Xenopus laevis)	0.624692	0.109295	0.0348228
209030_PM_s_at	CADM1	cell adhesion molecule 1	0.171424	0.109086	0.0813223
228937_PM_at	C13orf31	chromosome 13 open reading frame 31	0.124992	0.108647	0.102393
229357_PM_at	ADAMTS5	ADAM metallopeptidase with thrombospondin type 1 motif, 5	0.207039	0.107265	0.0288259
201195_PM_s_at	SLC7A5	solute carrier family 7 (cationic amino acid transporter, y+ system), member 5	0.114659	0.104316	0.230047
227566_PM_at	NTM	neurotrimin	0.213746	0.0982395	0.213157
233533_PM_at	KRTAP1-5	keratin associated protein 1-5	0.750624	0.0964893	0.0564581
205475_PM_at	SCRG1	stimulator of chondrogenesis 1	0.0921029	0.095281	0.0387415
219578_PM_s_at	CPEB1	cytoplasmic polyadenylation element binding protein 1	0.0883958	0.0940384	0.150381
1556427_PM_s_at	LRRN4CL	LRRN4 C-terminal like	0.0826598	0.0907486	0.191677
208394_PM_x_at	ESM1	endothelial cell-specific molecule 1	0.0962121	0.0884813	0.269733
222108_PM_at	AMIGO2	adhesion molecule with Ig-like domain 2	0.339066	0.0871449	0.271363
215704_PM_at	FLG	filaggrin	0.26685	0.0846998	0.015584
210587_PM_at	INHBE	inhibin, beta E	0.0776163	0.0845576	0.0998946
213332_PM_at	PAPPA2	pappalysin 2	0.0728931	0.0747652	0.0714591
209031_PM_at	CADM1	cell adhesion molecule 1	0.105532	0.0740698	0.0822855
234880_PM_x_at	KRTAP1-3	keratin associated protein 1-3	0.526033	0.0738015	0.052382
201596_PM_x_at	KRT18	keratin 18	0.162373	0.0722775	0.0257434
206237_PM_s_at	NRG1	neuregulin 1	0.107946	0.0674842	0.0688469
235368_PM_at	ADAMTS5	ADAM metallopeptidase with thrombospondin type 1 motif, 5	0.163631	0.0646358	0.0304948
207510_PM_at	BDKRB1	bradykinin receptor B1	0.152615	0.0631472	0.0604138
221111_PM_at	IL26	interleukin 26	0.0582178	0.0623838	0.0548955
222020_PM_s_at	NTM	neurotrimin	0.157543	0.0620472	0.17965
212909_PM_at	LYPD1	LY6/PLAUR domain containing 1	0.080667	0.0607372	0.0546335
206343_PM_s_at	NRG1	neuregulin 1	0.11874	0.0588055	0.0457046
217966_PM_s_at	FAM129A	family with sequence similarity 129, member A	0.0415789	0.0537594	0.130726
217967_PM_s_at	FAM129A	family with sequence similarity 129, member A	0.0299673	0.0530462	0.130005
221211_PM_s_at	C21orf7	chromosome 21 open reading frame 7	0.0582001	0.0508181	0.0559112
201650_PM_at	KRT19	keratin 19	0.16003	0.0500401	0.0304294
210002_PM_at	GATA6	GATA binding protein 6	0.164681	0.0482691	0.0306458
205207_PM_at	IL6	interleukin 6 (interferon, beta 2)	0.0441511	0.0320379	0.0249469
1555673_PM_at	hCG_1749898	KRTAP2-4 protein	0.23892	0.0306051	0.0183134
221577_PM_x_at	GDF15 /// LOC100292463	growth differentiation factor 15 /// similar to growth differentiation factor 15	0.0157779	0.0269829	0.206907
206969_PM_at	KRT34	keratin 34	0.099185	0.0234611	0.0250921
228335_PM_at	CLDN11	claudin 11	0.0448263	0.0211341	0.0258932
220976_PM_s_at	KRTAP1-1	keratin associated protein 1-1	0.213169	0.0158592	0.00791508

## Sheet: 10days Up (1.5fold)
Probe set	Symbol	Gene title	Fold change day 2/day0	Fold change day 5/day0	Fold change day 10/day0
214456_PM_x_at	SAA1 /// SAA2	serum amyloid A1 /// serum amyloid A2	128.161	256.896	256.54
207092_PM_at	LEP	leptin	51.4237	98.4663	237.88
209170_PM_s_at	GPM6B	glycoprotein M6B	25.4552	84.4994	230.634
213068_PM_at	DPT	dermatopontin	2.28024	38.5549	218.524
213948_PM_x_at		cell adhesion molecule 3	8.63809	74.4679	211.557
209167_PM_at	GPM6B	glycoprotein M6B	25.672	82.7419	207.577
205907_PM_s_at	OMD	osteomodulin	23.9982	86.0106	196.983
225987_PM_at	STEAP4	STEAP family member 4	8.99044	190.826	191.582
220356_PM_at	CORIN	corin, serine peptidase	21.9643	67.7656	153.337
228854_PM_at	---	---	62.2989	87.8864	119.352
207977_PM_s_at	DPT	dermatopontin	1.65017	20.4647	118.377
205908_PM_s_at	OMD	osteomodulin	9.10083	43.134	108.539
203698_PM_s_at	FRZB	frizzled-related protein	34.6097	59.1805	99.9469
219087_PM_at	ASPN	asporin	0.745852	15.7483	92.8812
218723_PM_s_at	C13orf15	chromosome 13 open reading frame 15	40.2485	38.2226	89.4049
239261_PM_s_at	CORIN	corin, serine peptidase	19.1464	42.3392	89.3331
239260_PM_at	CORIN	corin, serine peptidase	19.854	45.5396	88.6097
203697_PM_at	FRZB	frizzled-related protein	35.5932	53.6112	87.9592
213075_PM_at	OLFML2A	olfactomedin-like 2A	12.6423	34.2259	83.0141
201525_PM_at	APOD	apolipoprotein D	1.70281	6.4255	69.9264
209168_PM_at	GPM6B	glycoprotein M6B	5.45106	23.3687	68.8764
205382_PM_s_at	CFD	complement factor D (adipsin)	7.27466	27.8201	65.8428
224856_PM_at	FKBP5	FK506 binding protein 5	42.3914	58.0595	64.3334
208607_PM_s_at	SAA1 /// SAA2	serum amyloid A1 /// serum amyloid A2	26.6069	65.2981	63.1168
204223_PM_at	PRELP	proline/arginine-rich end leucine-rich repeat protein	8.4428	16.1781	60.4161
228224_PM_at	PRELP	proline/arginine-rich end leucine-rich repeat protein	7.30688	15.0141	59.4369
206100_PM_at	CPM	carboxypeptidase M	70.8026	53.9792	54.7112
235182_PM_at	ISM1	isthmin 1 homolog (zebrafish)	5.45647	25.5127	53.6799
213071_PM_at	DPT	dermatopontin	1.18746	5.92796	52.4038
211355_PM_x_at	LEPR	leptin receptor	24.7336	35.6415	49.4829
209613_PM_s_at	ADH1B	alcohol dehydrogenase 1B (class I), beta polypeptide	7.97544	17.6958	46.4164
211356_PM_x_at	LEPR	leptin receptor	23.7915	32.7659	45.8532
224396_PM_s_at	ASPN	asporin	0.783774	4.18816	45.0996
212741_PM_at	MAOA	monoamine oxidase A	20.0301	42.5569	44.5282
209612_PM_s_at	ADH1B	alcohol dehydrogenase 1B (class I), beta polypeptide	9.87884	21.1382	43.7522
229302_PM_at	TMEM178	transmembrane protein 178	3.25794	22.2971	43.2581
221796_PM_at	NTRK2	neurotrophic tyrosine kinase, receptor, type 2	1.27292	7.24466	43.0666
224840_PM_at	FKBP5	FK506 binding protein 5	27.3467	36.5369	42.5796
227762_PM_at	---	---	22.0101	30.2196	40.8823
202410_PM_x_at	IGF2 /// INS-IGF2	insulin-like growth factor 2 (somatomedin A) /// INS-IGF2 readthrough transcript	19.2204	29.5284	38.125
206243_PM_at	TIMP4	TIMP metallopeptidase inhibitor 4	7.81033	19.8548	38.0272
203021_PM_at	SLPI	secretory leukocyte peptidase inhibitor	5.76042	20.0062	36.2252
202409_PM_at	IGF2 /// INS-IGF2	insulin-like growth factor 2 (somatomedin A) /// INS-IGF2 readthrough transcript	20.783	29.0594	36.2031
205883_PM_at	ZBTB16	zinc finger and BTB domain containing 16	18.4301	25.0996	35.8817
205108_PM_s_at	APOB	apolipoprotein B (including Ag(x) antigen)	12.5155	25.1643	32.3089
235019_PM_at	CPM	carboxypeptidase M	44.9431	32.0729	32.1638
209169_PM_at	GPM6B	glycoprotein M6B	2.19717	10.1013	31.2783
211354_PM_s_at	LEPR	leptin receptor	16.9594	25.94	30.8
208470_PM_s_at	HP /// HPR	haptoglobin /// haptoglobin-related protein	1.32576	7.22094	29.9221
210881_PM_s_at	IGF2 /// INS-IGF2	insulin-like growth factor 2 (somatomedin A) /// INS-IGF2 readthrough transcript	14.4795	21.0545	29.114
211597_PM_s_at	HOPX	HOP homeobox	5.40379	8.75925	28.9875
220180_PM_at	CCDC68	coiled-coil domain containing 68	6.70706	9.58008	28.7628
223316_PM_at	CCDC3	coiled-coil domain containing 3	1.10254	2.21182	26.8735
202724_PM_s_at	FOXO1	forkhead box O1	8.59853	15.72	26.6399
205226_PM_at	PDGFRL	platelet-derived growth factor receptor-like	2.58319	14.5828	26.1114
209436_PM_at	SPON1	spondin 1, extracellular matrix protein	1.77541	10.8534	25.8559
217767_PM_at	C3	complement component 3	3.38622	17.9575	25.3866
235706_PM_at	CPM	carboxypeptidase M	37.91	23.546	25.2914
204388_PM_s_at	MAOA	monoamine oxidase A	7.9294	26.2402	25.1699
220786_PM_s_at	SLC38A4	solute carrier family 38, member 4	9.73175	13.4772	24.8692
206496_PM_at	FMO3	flavin containing monooxygenase 3	5.66577	10.7527	24.3919
234987_PM_at	---	---	5.40617	11.9577	24.0125
40665_PM_at	FMO3	flavin containing monooxygenase 3	5.38511	10.0837	23.8852
206407_PM_s_at	CCL13	chemokine (C-C motif) ligand 13	1.08624	17.8242	23.8315
226955_PM_at	AFAP1L1	actin filament associated protein 1-like 1	2.45907	8.89078	23.0124
215813_PM_s_at	PTGS1	prostaglandin-endoperoxide synthase 1 (prostaglandin G/H synthase and cyclooxygenase)	2.4134	8.03323	22.2866
201427_PM_s_at	SEPP1	selenoprotein P, plasma, 1	5.59611	8.94683	21.9453
202291_PM_s_at	MGP	matrix Gla protein	0.945016	3.96824	21.7151
222253_PM_s_at	POM121L9P	POM121 membrane glycoprotein-like 9 (rat) pseudogene	9.56285	19.8577	21.2463
204867_PM_at	GCHFR	GTP cyclohydrolase I feedback regulator	14.2157	11.135	21.2267
1559883_PM_s_at	SAMHD1	SAM domain and HD domain 1	4.59543	9.93137	21.1611
205128_PM_x_at	PTGS1	prostaglandin-endoperoxide synthase 1 (prostaglandin G/H synthase and cyclooxygenase)	2.47234	7.359	21.0808
230463_PM_at	---	---	3.85402	12.577	20.5927
202723_PM_s_at	FOXO1	forkhead box O1	7.79704	12.2213	20.5291
203000_PM_at	STMN2	stathmin-like 2	1.17435	5.39106	20.4935
235529_PM_x_at	---	---	4.52582	11.771	20.3524
219230_PM_at	TMEM100	transmembrane protein 100	2.01401	13.9849	20.1469
226931_PM_at	TMTC1	transmembrane and tetratricopeptide repeat containing 1	10.7088	12.3537	19.9925
204502_PM_at	SAMHD1	SAM domain and HD domain 1	5.36448	11.7346	19.7824
228716_PM_at	THRB	thyroid hormone receptor, beta (erythroblastic leukemia viral (v-erb-a) oncogene homolog 2, avian)	2.44429	3.72858	19.6629
1556997_PM_a_at	---	---	8.42366	17.1885	19.6006
205713_PM_s_at	COMP	cartilage oligomeric matrix protein	5.63248	11.5928	19.3438
227758_PM_at	RERG	RAS-like, estrogen-regulated, growth inhibitor	1.79631	7.31172	19.2898
235964_PM_x_at	---	---	4.76779	11.6795	19.1868
226322_PM_at	TMTC1	transmembrane and tetratricopeptide repeat containing 1	9.28443	13.6034	19.0762
219304_PM_s_at	PDGFD	platelet derived growth factor D	11.5697	11.9739	18.6068
1556185_PM_a_at	---	---	1.3602	18.339	18.5379
222722_PM_at	OGN	osteoglycin	1.24892	4.70142	18.3902
207761_PM_s_at	METTL7A	methyltransferase like 7A	5.66286	11.2851	17.8079
212558_PM_at	SPRY1	sprouty homolog 1, antagonist of FGF signaling (Drosophila)	5.21329	6.03485	17.6434
235751_PM_s_at	VMO1	vitelline membrane outer layer 1 homolog (chicken)	8.45568	26.4416	17.2224
207177_PM_at	PTGFR	prostaglandin F receptor (FP)	0.557919	5.73434	16.4879
204470_PM_at	CXCL1	chemokine (C-X-C motif) ligand 1 (melanoma growth stimulating activity, alpha)	2.26366	20.6557	16.4833
214180_PM_at	MAN1C1	mannosidase, alpha, class 1C, member 1	0.99121	2.48761	16.2872
224397_PM_s_at	TMTC1	transmembrane and tetratricopeptide repeat containing 1	10.2067	15.5949	16.1275
224646_PM_x_at	H19	H19, imprinted maternally expressed transcript (non-protein coding)	6.8482	17.6265	16.0917
219478_PM_at	WFDC1	WAP four-disulfide core domain 1	18.0099	33.1132	16.089
205609_PM_at	ANGPT1	angiopoietin 1	7.18119	12.4937	15.872
221921_PM_s_at	CADM3	cell adhesion molecule 3	1.28124	3.95056	15.8142
205608_PM_s_at	ANGPT1	angiopoietin 1	7.73833	11.4653	15.6579
244745_PM_at	RERG	RAS-like, estrogen-regulated, growth inhibitor	1.84772	5.94462	15.6217
206697_PM_s_at	HP	haptoglobin	1.27937	3.3488	15.5865
210729_PM_at	NPY2R	neuropeptide Y receptor Y2	1.9757	6.20362	15.3494
1555097_PM_a_at	PTGFR	prostaglandin F receptor (FP)	0.796713	4.96149	15.1779
209894_PM_at	LEPR	leptin receptor	10.1798	13.6071	15.172
227006_PM_at	PPP1R14A	protein phosphatase 1, regulatory (inhibitor) subunit 14A	26.5897	22.3913	15.0412
232523_PM_at	MEGF10	multiple EGF-like-domains 10	1.14345	1.19108	15.0373
227899_PM_at	VIT	vitrin	1.6773	4.35244	14.7959
202286_PM_s_at	TACSTD2	tumor-associated calcium signal transducer 2	1.22584	4.80079	14.6519
227480_PM_at	SUSD2	sushi domain containing 2	4.39756	11.9513	14.6249
203001_PM_s_at	STMN2	stathmin-like 2	1.09552	3.58081	14.0461
229271_PM_x_at	COL11A1	collagen, type XI, alpha 1	6.63844	10.2524	14.009
242002_PM_at	NKAIN2	Na+/K+ transporting ATPase interacting 2	2.4255	5.50877	13.9825
202376_PM_at	SERPINA3	serpin peptidase inhibitor, clade A (alpha-1 antiproteinase, antitrypsin), member 3	0.976242	5.71465	13.9252
202859_PM_x_at	IL8	interleukin 8	3.82657	5.69332	13.9063
208335_PM_s_at	DARC	Duffy blood group, chemokine receptor	1.24665	6.47493	13.8302
211677_PM_x_at	CADM3	cell adhesion molecule 3	1.57357	4.74625	13.7899
213994_PM_s_at	SPON1	spondin 1, extracellular matrix protein	1.12157	7.43661	13.6934
227307_PM_at	TSPAN18	Tetraspanin 18	5.53623	10.2008	13.642
206002_PM_at	GPR64	G protein-coupled receptor 64	5.029	13.9437	13.6291
213895_PM_at	EMP1	epithelial membrane protein 1	3.46495	6.22057	13.5665
210147_PM_at	ART3	ADP-ribosyltransferase 3	2.1086	2.81709	13.5303
205582_PM_s_at	GGT5	gamma-glutamyltransferase 5	4.57263	8.47813	13.4432
202035_PM_s_at	SFRP1	secreted frizzled-related protein 1	4.66787	7.75737	13.3697
206176_PM_at	BMP6	bone morphogenetic protein 6	49.2693	17.1685	13.0746
203184_PM_at	FBN2	fibrillin 2	8.25761	15.7013	12.9705
236936_PM_at	---	---	4.42426	9.3966	12.851
201787_PM_at	FBLN1	fibulin 1	3.10102	7.34102	12.6771
204035_PM_at	SCG2	secretogranin II (chromogranin C)	0.619979	4.74586	12.5225
208510_PM_s_at	PPARG	peroxisome proliferator-activated receptor gamma	4.37958	8.80262	12.4741
226055_PM_at	ARRDC2	arrestin domain containing 2	4.32106	5.04012	11.9947
219398_PM_at	CIDEC	cell death-inducing DFFA-like effector c	1.97559	6.59153	11.982
229011_PM_at	---	---	3.74257	6.53607	11.9727
213348_PM_at	CDKN1C	cyclin-dependent kinase inhibitor 1C (p57, Kip2)	10.3386	12.4812	11.9334
209343_PM_at	EFHD1	EF-hand domain family, member D1	9.11079	6.95283	11.7941
206631_PM_at	PTGER2	prostaglandin E receptor 2 (subtype EP2), 53kDa	6.97127	7.69987	11.624
203407_PM_at	PPL	periplakin	1.1312	4.0219	11.5725
206315_PM_at	CRLF1	cytokine receptor-like factor 1	2.04819	5.49134	11.543
238919_PM_at	---	---	9.01501	6.74384	11.2972
239638_PM_at	---	---	3.52065	5.78829	11.2223
244419_PM_at	FRZB	Frizzled-related protein	2.99968	5.80754	11.1847
218918_PM_at	MAN1C1	mannosidase, alpha, class 1C, member 1	1.06753	1.94535	11.1448
241450_PM_at	RSPO1	R-spondin homolog (Xenopus laevis)	2.37726	4.57822	11.1265
202037_PM_s_at	SFRP1	secreted frizzled-related protein 1	5.4432	7.71546	11.1211
204718_PM_at	EPHB6	EPH receptor B6	1.47457	4.96793	10.9366
203435_PM_s_at	MME	membrane metallo-endopeptidase	1.77863	6.63048	10.8914
204897_PM_at	PTGER4	prostaglandin E receptor 4 (subtype EP4)	4.0735	6.58457	10.8345
228176_PM_at	S1PR3	sphingosine-1-phosphate receptor 3	3.62861	10.6023	10.7297
37022_PM_at	PRELP	proline/arginine-rich end leucine-rich repeat protein	1.82274	2.91174	10.7207
223623_PM_at	C2orf40	chromosome 2 open reading frame 40	1.20396	2.34728	10.6045
232805_PM_at	---	---	2.47255	4.55087	10.5163
223333_PM_s_at	ANGPTL4	angiopoietin-like 4	3.08157	3.80914	10.2998
205082_PM_s_at	AOX1	aldehyde oxidase 1	5.22182	8.03952	10.2432
204389_PM_at	MAOA	monoamine oxidase A	3.72974	9.74091	10.2245
215119_PM_at	MYO16	myosin XVI	2.9461	5.34154	10.1911
205083_PM_at	AOX1	aldehyde oxidase 1	6.26052	8.04718	10.0713
219737_PM_s_at	PCDH9	protocadherin 9	6.68662	5.86493	10.0628
208396_PM_s_at	PDE1A	phosphodiesterase 1A, calmodulin-dependent	1.07519	3.20456	10.026
225516_PM_at	SLC7A2	solute carrier family 7 (cationic amino acid transporter, y+ system), member 2	1.36749	4.32738	10.0077
206819_PM_at	POM121L9P	POM121 membrane glycoprotein-like 9 (rat) pseudogene	3.99409	8.93906	9.83847
213519_PM_s_at	LAMA2	laminin, alpha 2	1.65003	3.4183	9.68879
238669_PM_at	PTGS1	prostaglandin-endoperoxide synthase 1 (prostaglandin G/H synthase and cyclooxygenase)	1.70248	2.89356	9.60103
213247_PM_at	SVEP1	sushi, von Willebrand factor type A, EGF and pentraxin domain containing 1	4.26824	6.47522	9.4611
212713_PM_at	MFAP4	microfibrillar-associated protein 4	1.37274	3.5066	9.43378
207001_PM_x_at	TSC22D3	TSC22 domain family, member 3	2.63286	4.70512	9.41224
209189_PM_at	FOS	FBJ murine osteosarcoma viral oncogene homolog	5.46314	8.168	9.32638
209074_PM_s_at	FAM107A	family with sequence similarity 107, member A	2.39936	6.34204	9.23693
243879_PM_at	---	---	1.49915	4.3767	9.04748
218730_PM_s_at	OGN	osteoglycin	0.967456	2.48229	9.0168
205116_PM_at	LAMA2	laminin, alpha 2	1.66871	3.42575	8.95263
203921_PM_at	CHST2	carbohydrate (N-acetylglucosamine-6-O) sulfotransferase 2	6.52244	8.80048	8.89926
209505_PM_at	NR2F1	Nuclear receptor subfamily 2, group F, member 1	4.1731	5.10021	8.79361
228819_PM_at	TSPAN18	tetraspanin 18	4.64486	6.89811	8.77917
213493_PM_at	SNED1	sushi, nidogen and EGF-like domains 1	0.974891	3.0016	8.76784
204560_PM_at	FKBP5	FK506 binding protein 5	7.6883	8.21049	8.73129
206766_PM_at	ITGA10	integrin, alpha 10	5.19789	4.60826	8.62596
222860_PM_s_at	PDGFD	platelet derived growth factor D	5.91954	4.80506	8.58236
206509_PM_at	PIP	prolactin-induced protein	1.10484	1.33274	8.45439
202995_PM_s_at	FBLN1	fibulin 1	2.51368	5.0761	8.44197
217504_PM_at	ABCA6	ATP-binding cassette, sub-family A (ABC1), member 6	1.30057	3.27256	8.35744
223235_PM_s_at	SMOC2	SPARC related modular calcium binding 2	1.03886	1.90882	8.22944
203434_PM_s_at	MME	membrane metallo-endopeptidase	1.64322	5.60205	8.19456
202718_PM_at	IGFBP2	insulin-like growth factor binding protein 2, 36kDa	3.73786	4.00628	8.17064
228653_PM_at	SAMD5	sterile alpha motif domain containing 5	3.52273	6.02223	8.09688
52255_PM_s_at	COL5A3	collagen, type V, alpha 3	1.45673	2.75518	8.05511
231015_PM_at	KLF15	Kruppel-like factor 15	2.65309	3.96681	8.02574
205249_PM_at	EGR2	early growth response 2	0.359865	0.406657	8.02197
232736_PM_s_at	POM121L8P /// POM121L9P	POM121 membrane glycoprotein-like 8 (rat) pseudogene /// POM121 membrane glycoprotein-like 9 (rat) pseudogene	3.51824	7.20735	7.98325
219738_PM_s_at	PCDH9	protocadherin 9	3.40822	4.73877	7.81156
204136_PM_at	COL7A1	collagen, type VII, alpha 1	2.34228	3.25524	7.79089
236361_PM_at	GALNTL2	UDP-N-acetyl-alpha-D-galactosamine:polypeptide N-acetylgalactosaminyltransferase-like 2	7.25865	9.21771	7.70032
214022_PM_s_at	IFITM1	interferon induced transmembrane protein 1 (9-27)	1.43734	4.66677	7.61411
215306_PM_at	---	---	2.82666	3.97545	7.61181
226192_PM_at	---	---	3.16184	3.80468	7.5892
228910_PM_at	---	---	2.8404	5.34994	7.53898
229831_PM_at	CNTN3	contactin 3 (plasmacytoma associated)	1.99952	3.32046	7.51878
202994_PM_s_at	FBLN1	fibulin 1	2.3084	4.80203	7.50571
202421_PM_at	IGSF3	immunoglobulin superfamily, member 3	0.8416	1.01086	7.47724
205404_PM_at	HSD11B1	hydroxysteroid (11-beta) dehydrogenase 1	1.03048	1.41795	7.4651
216840_PM_s_at	LAMA2	laminin, alpha 2	1.46459	2.87936	7.45044
229623_PM_at	FLJ12993	Hypothetical LOC441027	3.41334	7.04553	7.41231
226047_PM_at	MRVI1	murine retrovirus integration site 1 homolog	8.58595	8.60565	7.29045
1552289_PM_a_at	CILP2	cartilage intermediate layer protein 2	1.42005	1.82076	7.2894
204040_PM_at	RNF144A	ring finger protein 144A	0.998448	4.91595	7.24532
238463_PM_at	---	---	2.31086	5.31072	7.18795
218309_PM_at	CAMK2N1	calcium/calmodulin-dependent protein kinase II inhibitor 1	5.2088	3.69626	7.18685
1556114_PM_a_at	DKFZp451A211	DKFZp451A211 protein	7.08484	7.01102	7.1698
201743_PM_at	CD14	CD14 molecule	1.05655	2.6127	7.14913
209883_PM_at	GLT25D2	glycosyltransferase 25 domain containing 2	1.78554	2.0554	7.1394
204320_PM_at	COL11A1	collagen, type XI, alpha 1	3.69248	5.75409	7.08813
1564796_PM_at	EMP1	epithelial membrane protein 1	2.45905	4.51465	7.07018
37892_PM_at	COL11A1	collagen, type XI, alpha 1	3.81845	5.76599	7.05629
204154_PM_at	CDO1	cysteine dioxygenase, type I	1.11603	4.25183	6.99607
213413_PM_at	STON1	stonin 1	3.45663	4.7265	6.98175
214587_PM_at	COL8A1	collagen, type VIII, alpha 1	5.40794	6.83035	6.91521
204457_PM_s_at	GAS1	growth arrest-specific 1	4.96262	7.88393	6.84376
230958_PM_s_at	---	---	4.71361	6.08721	6.76674
208096_PM_s_at	COL21A1	collagen, type XXI, alpha 1	0.88895	2.11363	6.69297
217312_PM_s_at	COL7A1	collagen, type VII, alpha 1	2.16126	3.03182	6.6892
1557720_PM_s_at	MYO16	myosin XVI	2.71539	2.98197	6.6868
235743_PM_at	---	---	1.07848	1.63983	6.67551
207255_PM_at	LEPR	leptin receptor	5.03415	6.88039	6.63564
1555345_PM_at	SLC38A4	solute carrier family 38, member 4	2.57938	3.25129	6.59198
209506_PM_s_at	NR2F1	nuclear receptor subfamily 2, group F, member 1	4.05057	3.65281	6.58734
217757_PM_at	A2M	alpha-2-macroglobulin	1.63723	3.55895	6.56231
226806_PM_s_at	NFIA	nuclear factor I/A	3.6773	5.42136	6.51745
211006_PM_s_at	KCNB1	potassium voltage-gated channel, Shab-related subfamily, member 1	18.5981	6.9618	6.49548
212240_PM_s_at	PIK3R1	phosphoinositide-3-kinase, regulatory subunit 1 (alpha)	2.75971	5.6161	6.49141
213488_PM_at	SNED1	sushi, nidogen and EGF-like domains 1	0.895601	2.30293	6.37133
233547_PM_x_at	PDE1A	phosphodiesterase 1A, calmodulin-dependent	1.05695	1.98567	6.32927
225204_PM_at	PPTC7	PTC7 protein phosphatase homolog (S. cerevisiae)	1.29163	3.40855	6.27519
221009_PM_s_at	ANGPTL4	angiopoietin-like 4	2.74719	2.96933	6.22277
213652_PM_at	PCSK5	Proprotein convertase subtilisin/kexin type 5	1.57941	2.91754	6.17767
213056_PM_at	FRMD4B	FERM domain containing 4B	2.42004	2.90041	6.158
230214_PM_at	MRVI1	murine retrovirus integration site 1 homolog	9.52698	7.79431	6.12862
227425_PM_at	REPS2	RALBP1 associated Eps domain containing 2	0.941724	2.18829	6.12068
233109_PM_at	COL12A1	Collagen, type XII, alpha 1	2.35478	4.64964	6.10958
228501_PM_at	GALNTL2	UDP-N-acetyl-alpha-D-galactosamine:polypeptide N-acetylgalactosaminyltransferase-like 2	5.58901	7.6058	6.10696
212239_PM_at	PIK3R1	phosphoinositide-3-kinase, regulatory subunit 1 (alpha)	2.81929	5.71558	6.10355
40837_PM_at	TLE2	transducin-like enhancer of split 2 (E(sp1) homolog, Drosophila)	1.28233	3.15365	6.01171
227032_PM_at	PLXNA2	plexin A2	5.92167	4.51623	6.00814
201998_PM_at	ST6GAL1	ST6 beta-galactosamide alpha-2,6-sialyltranferase 1	1.56854	3.40516	6.00621
226197_PM_at	---	---	2.36926	3.46672	5.97288
227020_PM_at	YPEL2	yippee-like 2 (Drosophila)	1.73767	3.05519	5.97236
202388_PM_at	RGS2	regulator of G-protein signaling 2, 24kDa	2.43699	7.98523	5.95092
205818_PM_at	DBC1	deleted in bladder cancer 1	1.76798	4.75287	5.946
231262_PM_at	---	---	2.84175	4.9607	5.92429
204187_PM_at	GMPR	guanosine monophosphate reductase	3.4242	4.82534	5.91979
233181_PM_at	---	---	1.49483	2.25166	5.89428
232458_PM_at	COL3A1	Collagen, type III, alpha 1	1.4718	5.31174	5.88104
223402_PM_at	DUSP23	dual specificity phosphatase 23	5.04222	6.00398	5.85413
213993_PM_at	SPON1	spondin 1, extracellular matrix protein	1.14185	2.16361	5.84897
231337_PM_at	---	---	1.36971	2.57346	5.77307
203126_PM_at	IMPA2	inositol(myo)-1(or 4)-monophosphatase 2	10.3115	9.20179	5.7554
213714_PM_at	CACNB2	calcium channel, voltage-dependent, beta 2 subunit	1.34792	2.41655	5.75307
236035_PM_at	---	---	1.79421	3.46076	5.68782
227862_PM_at	TRNP1	TMF1-regulated nuclear protein 1	3.73367	5.16856	5.6875
208018_PM_s_at	HCK	hemopoietic cell kinase	1.40828	1.99055	5.67983
227803_PM_at	ENPP5	ectonucleotide pyrophosphatase/phosphodiesterase 5 (putative function)	1.14903	1.92069	5.65667
231798_PM_at	NOG	noggin	4.29877	5.98045	5.64574
202861_PM_at	PER1	period homolog 1 (Drosophila)	4.55866	5.22466	5.63765
1555854_PM_at	---	---	0.820988	1.84437	5.60842
211663_PM_x_at	PTGDS	prostaglandin D2 synthase 21kDa (brain)	0.45577	1.29553	5.59082
1563038_PM_at	---	---	0.971183	1.31426	5.55726
221795_PM_at	NTRK2	neurotrophic tyrosine kinase, receptor, type 2	1.0629	1.38489	5.53636
224901_PM_at	SCD5	stearoyl-CoA desaturase 5	3.83694	5.09107	5.51294
223044_PM_at	SLC40A1	solute carrier family 40 (iron-regulated transporter), member 1	1.13632	1.55747	5.50966
201601_PM_x_at	IFITM1	interferon induced transmembrane protein 1 (9-27)	1.31966	3.40025	5.49944
213462_PM_at	NPAS2	neuronal PAS domain protein 2	1.76991	2.3786	5.49159
227654_PM_at	FAM65C	family with sequence similarity 65, member C	1.31555	1.51159	5.46671
206101_PM_at	ECM2	extracellular matrix protein 2, female organ and adipocyte specific	1.05689	2.23333	5.42624
227948_PM_at	FGD4	FYVE, RhoGEF and PH domain containing 4	12.4559	4.94188	5.39459
1556606_PM_at	NAV2	neuron navigator 2	2.46196	2.52056	5.38468
205782_PM_at	FGF7	fibroblast growth factor 7 (keratinocyte growth factor)	3.38225	4.53798	5.37522
227620_PM_at	SLC44A1	solute carrier family 44, member 1	3.20199	3.57129	5.35606
219315_PM_s_at	TMEM204	transmembrane protein 204	1.82702	3.02532	5.35481
218589_PM_at	LPAR6	lysophosphatidic acid receptor 6	2.20187	3.74301	5.28241
206091_PM_at	MATN3	matrilin 3	3.04032	4.78167	5.26191
212543_PM_at	AIM1	absent in melanoma 1	1.78264	3.67966	5.23377
235099_PM_at	CMTM8	CKLF-like MARVEL transmembrane domain containing 8	1.72994	3.1615	5.21086
213030_PM_s_at	PLXNA2	plexin A2	5.43919	3.64489	5.2044
201044_PM_x_at	DUSP1	dual specificity phosphatase 1	6.34065	4.39853	5.19933
241765_PM_at	CPM	carboxypeptidase M	7.34594	4.82392	5.19087
208161_PM_s_at	ABCC3	ATP-binding cassette, sub-family C (CFTR/MRP), member 3	1.96571	3.34553	5.13723
1561418_PM_at	---	---	2.85945	3.06968	5.12507
228057_PM_at	DDIT4L	DNA-damage-inducible transcript 4-like	1.20296	8.1646	5.12034
203186_PM_s_at	S100A4	S100 calcium binding protein A4	1.31339	3.27323	5.10796
218975_PM_at	COL5A3	collagen, type V, alpha 3	1.169	2.20576	5.0894
39549_PM_at	NPAS2	neuronal PAS domain protein 2	1.51873	2.24475	5.04403
203961_PM_at	NEBL	nebulette	1.05499	1.0924	5.01782
227721_PM_at	CPAMD8	C3 and PZP-like, alpha-2-macroglobulin domain containing 8	1.00784	1.33311	5.01762
204526_PM_s_at	TBC1D8	TBC1 domain family, member 8 (with GRAM domain)	1.67734	2.34332	5.01118
221572_PM_s_at	SLC26A6	solute carrier family 26, member 6	2.57854	3.4328	4.96327
222062_PM_at	IL27RA	interleukin 27 receptor, alpha	2.30995	2.75734	4.96241
200795_PM_at	SPARCL1	SPARC-like 1 (hevin)	1.07622	1.36669	4.95299
212886_PM_at	CCDC69	coiled-coil domain containing 69	2.86866	6.27079	4.91997
228523_PM_at	NANOS1	nanos homolog 1 (Drosophila)	0.895257	1.37073	4.91507
1568779_PM_a_at	ECM2	extracellular matrix protein 2, female organ and adipocyte specific	1.49191	2.11291	4.90983
218330_PM_s_at	NAV2	neuron navigator 2	3.82777	2.96127	4.90447
210875_PM_s_at	ZEB1	zinc finger E-box binding homeobox 1	2.5705	3.78761	4.90221
201295_PM_s_at	WSB1	WD repeat and SOCS box-containing 1	1.39476	3.64088	4.89688
205560_PM_at	PCSK5	proprotein convertase subtilisin/kexin type 5	1.16628	1.91984	4.88781
214238_PM_at	---	---	1.77245	1.88617	4.86203
227095_PM_at	---	---	2.55015	3.89556	4.86151
209614_PM_at	ADH1B	alcohol dehydrogenase 1B (class I), beta polypeptide	1.33246	2.34378	4.80841
214719_PM_at	SLC46A3	solute carrier family 46, member 3	2.8831	2.6007	4.80604
213110_PM_s_at	COL4A5	collagen, type IV, alpha 5	1.60539	2.42603	4.80579
235746_PM_s_at	PLA2R1	phospholipase A2 receptor 1, 180kDa	1.1587	1.88917	4.79917
227062_PM_at	NEAT1	nuclear paraspeckle assembly transcript 1 (non-protein coding)	1.9819	3.01371	4.79062
36829_PM_at	PER1	period homolog 1 (Drosophila)	3.97606	4.82305	4.7747
209301_PM_at	CA2	carbonic anhydrase II	1.64346	11.9479	4.76403
226908_PM_at	LRIG3	leucine-rich repeats and immunoglobulin-like domains 3	1.95507	3.18964	4.76297
225016_PM_at	APCDD1	adenomatosis polyposis coli down-regulated 1	1.64952	2.80428	4.75784
205559_PM_s_at	PCSK5	proprotein convertase subtilisin/kexin type 5	1.26028	2.15697	4.74383
231031_PM_at	KGFLP2	keratinocyte growth factor-like protein 2	2.81496	4.30478	4.73928
208763_PM_s_at	TSC22D3	TSC22 domain family, member 3	2.39062	3.11219	4.7361
212187_PM_x_at	PTGDS	prostaglandin D2 synthase 21kDa (brain)	0.500631	1.32129	4.73425
1552508_PM_at	KCNE4	potassium voltage-gated channel, Isk-related family, member 4	1.40774	2.8763	4.73348
228486_PM_at	SLC44A1	solute carrier family 44, member 1	1.91764	2.52375	4.66301
225177_PM_at	RAB11FIP1	RAB11 family interacting protein 1 (class I)	5.65026	6.00676	4.64495
216894_PM_x_at	CDKN1C	cyclin-dependent kinase inhibitor 1C (p57, Kip2)	4.79098	5.11132	4.64181
234233_PM_s_at	---	---	2.0177	2.24177	4.63348
202709_PM_at	FMOD	fibromodulin	1.20989	2.46707	4.62552
222513_PM_s_at	SORBS1	sorbin and SH3 domain containing 1	4.44146	4.03057	4.62
211748_PM_x_at	PTGDS	prostaglandin D2 synthase 21kDa (brain)	0.487602	1.3215	4.59921
205200_PM_at	CLEC3B	C-type lectin domain family 3, member B	1.30213	2.7626	4.57638
229518_PM_at	FAM46B	family with sequence similarity 46, member B	4.09436	5.50088	4.57594
204041_PM_at	MAOB	monoamine oxidase B	2.08405	3.96371	4.54974
228461_PM_at	SH3RF3	SH3 domain containing ring finger 3	2.80544	4.15365	4.54165
225123_PM_at	---	---	2.41087	3.82394	4.54055
202036_PM_s_at	SFRP1	secreted frizzled-related protein 1	4.81896	4.37925	4.53946
212338_PM_at	MYO1D	myosin ID	1.58481	1.78242	4.52999
240869_PM_at	---	---	6.85714	4.63664	4.52825
202283_PM_at	SERPINF1	serpin peptidase inhibitor, clade F (alpha-2 antiplasmin, pigment epithelium derived factor), member 1	0.99935	2.31317	4.50193
224061_PM_at	INMT	indolethylamine N-methyltransferase	1.84951	2.73617	4.49876
203886_PM_s_at	FBLN2	fibulin 2	0.907228	2.44673	4.49229
212249_PM_at	PIK3R1	phosphoinositide-3-kinase, regulatory subunit 1 (alpha)	2.15201	4.63877	4.48495
232825_PM_s_at	DSEL	dermatan sulfate epimerase-like	1.63423	2.70928	4.43616
209641_PM_s_at	ABCC3	ATP-binding cassette, sub-family C (CFTR/MRP), member 3	2.3386	3.10893	4.4357
220540_PM_at	KCNK15	potassium channel, subfamily K, member 15	0.779288	1.02616	4.43492
206910_PM_x_at	CFHR2	complement factor H-related 2	2.01119	3.26463	4.42782
224975_PM_at	NFIA	nuclear factor I/A	3.23919	4.19343	4.41411
222784_PM_at	SMOC1	SPARC related modular calcium binding 1	3.54358	2.90915	4.383
221489_PM_s_at	SPRY4	sprouty homolog 4 (Drosophila)	3.07386	1.63797	4.37497
214581_PM_x_at	TNFRSF21	tumor necrosis factor receptor superfamily, member 21	2.84985	4.51459	4.37387
1559965_PM_at	LOC100192378	hypothetical LOC100192378	3.32858	3.54507	4.36687
229121_PM_at	CMKLR1	chemokine-like receptor 1	0.543459	1.52704	4.34481
202008_PM_s_at	NID1	nidogen 1	1.90434	2.62198	4.33484
204916_PM_at	RAMP1	receptor (G protein-coupled) activity modifying protein 1	6.26768	2.76513	4.32829
239952_PM_at	ZEB1	zinc finger E-box binding homeobox 1	2.20373	3.41664	4.32614
236038_PM_at	---	---	1.45564	2.37767	4.31484
202017_PM_at	EPHX1	epoxide hydrolase 1, microsomal (xenobiotic)	1.85425	2.35052	4.31464
204042_PM_at	WASF3	WAS protein family, member 3	2.16527	2.95717	4.30096
229978_PM_at	LOC729993	hypothetical protein LOC729993	1.32184	1.78078	4.27391
219534_PM_x_at	CDKN1C	cyclin-dependent kinase inhibitor 1C (p57, Kip2)	4.57251	4.66555	4.27096
205698_PM_s_at	MAP2K6	mitogen-activated protein kinase kinase 6	1.19102	3.56731	4.26933
209699_PM_x_at	AKR1C2	aldo-keto reductase family 1, member C2 (dihydrodiol dehydrogenase 2; bile acid binding protein; 3-alpha hydroxysteroid dehydrogenase, type III)	0.734423	2.26258	4.24615
205941_PM_s_at	COL10A1	collagen, type X, alpha 1	0.826966	0.978876	4.24433
209185_PM_s_at	IRS2	insulin receptor substrate 2	4.0342	2.95803	4.23882
234989_PM_at	NEAT1	nuclear paraspeckle assembly transcript 1 (non-protein coding)	2.02487	3.74193	4.23813
214433_PM_s_at	SELENBP1	selenium binding protein 1	2.2747	4.56197	4.23534
214608_PM_s_at	EYA1	eyes absent homolog 1 (Drosophila)	1.19504	3.46818	4.22951
215388_PM_s_at	CFH /// CFHR1	complement factor H /// complement factor H-related 1	1.71587	3.05228	4.22285
223611_PM_s_at	LNX1	ligand of numb-protein X 1	1.11092	2.06581	4.20129
231773_PM_at	ANGPTL1	angiopoietin-like 1	1.54764	5.19545	4.19015
228959_PM_at	---	---	0.932083	2.28583	4.18671
218856_PM_at	TNFRSF21	tumor necrosis factor receptor superfamily, member 21	2.59881	3.87406	4.18082
242281_PM_at	---	---	2.36188	2.61719	4.17455
231698_PM_at	FLJ36848	hypothetical LOC647115	2.62078	3.89496	4.13683
235427_PM_at	---	---	3.57448	3.58758	4.13672
224970_PM_at	NFIA	nuclear factor I/A	3.07914	3.39815	4.12131
1556069_PM_s_at	HIF3A	hypoxia inducible factor 3, alpha subunit	0.9774	1.60176	4.11584
212978_PM_at	LRRC8B	leucine rich repeat containing 8 family, member B	1.47036	3.79646	4.11329
235740_PM_at	---	---	1.49986	1.31873	4.09958
239273_PM_s_at	MMP28	matrix metallopeptidase 28	1.75915	5.67159	4.07928
223467_PM_at	RASD1	RAS, dexamethasone-induced 1	2.38266	6.51019	4.07516
216594_PM_x_at	AKR1C1	aldo-keto reductase family 1, member C1 (dihydrodiol dehydrogenase 1; 20-alpha (3-alpha)-hydroxysteroid dehydrogenase)	0.748049	2.29126	4.06832
200648_PM_s_at	GLUL	glutamate-ammonia ligase (glutamine synthetase)	3.31752	3.29998	4.06796
204160_PM_s_at	ENPP4	ectonucleotide pyrophosphatase/phosphodiesterase 4 (putative function)	1.52947	2.77664	4.06299
204720_PM_s_at	DNAJC6	DnaJ (Hsp40) homolog, subfamily C, member 6	5.11192	4.73805	4.04544
229876_PM_at	PHKA1	phosphorylase kinase, alpha 1 (muscle)	0.985909	1.95814	4.0408
203904_PM_x_at	CD82	CD82 molecule	1.64228	3.32006	4.03288
217546_PM_at	MT1M	metallothionein 1M	2.53975	5.05053	4.03118
217853_PM_at	TNS3	tensin 3	2.24002	2.29558	4.02646
225968_PM_at	PRICKLE2	prickle homolog 2 (Drosophila)	1.62287	2.4766	4.02215
223464_PM_at	OSBPL5	oxysterol binding protein-like 5	2.8606	3.36039	4.02181
202761_PM_s_at	SYNE2	spectrin repeat containing, nuclear envelope 2	4.68128	4.45121	4.01793
211653_PM_x_at	AKR1C2	aldo-keto reductase family 1, member C2 (dihydrodiol dehydrogenase 2; bile acid binding protein; 3-alpha hydroxysteroid dehydrogenase, type III)	0.696862	2.16499	4.01645
1559966_PM_a_at	LOC100192378	hypothetical LOC100192378	3.01368	3.46311	4.01227
236234_PM_at	PDE1A	phosphodiesterase 1A, calmodulin-dependent	1.21478	2.1022	3.99862
204439_PM_at	IFI44L	interferon-induced protein 44-like	1.20069	3.95991	3.97978
231118_PM_at	ANKRD35	ankyrin repeat domain 35	1.75692	2.88053	3.97748
206390_PM_x_at	PF4	platelet factor 4	1.97151	2.98768	3.96599
222140_PM_s_at	GPR89A /// GPR89B /// GPR89C	G protein-coupled receptor 89A /// G protein-coupled receptor 89B /// G protein-coupled receptor 89C	2.0265	2.52396	3.9409
1558680_PM_s_at	PDE1A	phosphodiesterase 1A, calmodulin-dependent	1.106	1.59697	3.93841
223531_PM_x_at	GPR89A /// GPR89B /// GPR89C	G protein-coupled receptor 89A /// G protein-coupled receptor 89B /// G protein-coupled receptor 89C	1.97792	2.56381	3.93731
209184_PM_s_at	IRS2	insulin receptor substrate 2	4.46302	2.88441	3.90495
1553102_PM_a_at	CCDC69	coiled-coil domain containing 69	2.27989	4.75268	3.90329
201963_PM_at	ACSL1	acyl-CoA synthetase long-chain family member 1	1.19499	2.21339	3.90267
244885_PM_at	---	---	0.912585	3.01727	3.89827
203088_PM_at	FBLN5	fibulin 5	2.89553	2.85336	3.86343
211317_PM_s_at	CFLAR	CASP8 and FADD-like apoptosis regulator	3.41257	3.98576	3.85447
201827_PM_at	SMARCD2	SWI/SNF related, matrix associated, actin dependent regulator of chromatin, subfamily d, member 2	1.89582	2.86517	3.82171
204151_PM_x_at	AKR1C1	aldo-keto reductase family 1, member C1 (dihydrodiol dehydrogenase 1; 20-alpha (3-alpha)-hydroxysteroid dehydrogenase)	0.73787	2.24746	3.81726
239272_PM_at	MMP28	matrix metallopeptidase 28	2.12795	4.1367	3.81469
234985_PM_at	LDLRAD3	low density lipoprotein receptor class A domain containing 3	1.03717	2.28617	3.7953
236300_PM_at	---	---	3.0536	5.43962	3.79164
209321_PM_s_at	ADCY3	adenylate cyclase 3	1.55969	2.55199	3.79055
219054_PM_at	C5orf23	chromosome 5 open reading frame 23	4.34574	4.52809	3.78964
227354_PM_at	PAG1	phosphoprotein associated with glycosphingolipid microdomains 1	1.24889	1.55431	3.78708
212570_PM_at	ENDOD1	endonuclease domain containing 1	4.28594	3.52346	3.77833
202948_PM_at	IL1R1	interleukin 1 receptor, type I	1.55691	3.46668	3.77172
202992_PM_at	C7	complement component 7	0.890845	1.16596	3.76657
217428_PM_s_at	COL10A1	collagen, type X, alpha 1	0.806144	0.933619	3.76598
230577_PM_at	---	---	1.55573	2.27903	3.75923
203865_PM_s_at	ADARB1	adenosine deaminase, RNA-specific, B1 (RED1 homolog rat)	3.96901	3.64063	3.75306
232235_PM_at	DSEL	dermatan sulfate epimerase-like	1.77496	2.63856	3.75303
223468_PM_s_at	RGMA	RGM domain family, member A	1.84742	4.23981	3.75278
213763_PM_at	HIPK2	homeodomain interacting protein kinase 2	2.44051	3.34311	3.75162
1555318_PM_at	HIF3A	hypoxia inducible factor 3, alpha subunit	1.33526	1.61637	3.71522
238178_PM_at	---	---	2.89887	6.39227	3.71195
213800_PM_at	CFH	complement factor H	1.24992	2.34898	3.71189
217202_PM_s_at	GLUL	glutamate-ammonia ligase (glutamine synthetase)	3.02538	2.91094	3.70715
227827_PM_at	---	---	2.72832	3.47547	3.70024
205730_PM_s_at	ABLIM3	actin binding LIM protein family, member 3	2.03586	2.3482	3.68596
228302_PM_x_at	CAMK2N1	calcium/calmodulin-dependent protein kinase II inhibitor 1	3.13505	1.92384	3.68227
211862_PM_x_at	CFLAR	CASP8 and FADD-like apoptosis regulator	3.15549	3.09477	3.68087
220642_PM_x_at	GPR89A /// GPR89B /// GPR89C	G protein-coupled receptor 89A /// G protein-coupled receptor 89B /// G protein-coupled receptor 89C	1.88918	2.55845	3.67858
225612_PM_s_at	B3GNT5	UDP-GlcNAc:betaGal beta-1,3-N-acetylglucosaminyltransferase 5	2.80395	2.45793	3.67558
227554_PM_at	---	---	1.79936	2.47078	3.67553
232180_PM_at	UGP2	UDP-glucose pyrophosphorylase 2	2.09048	2.88132	3.66408
226731_PM_at	PELO	Pelota homolog (Drosophila)	4.02261	4.3644	3.66209
207290_PM_at	PLXNA2	plexin A2	5.64854	2.7918	3.66151
231929_PM_at	IKZF2	IKAROS family zinc finger 2 (Helios)	12.7006	8.49354	3.65002
225463_PM_x_at	GPR89A /// GPR89B /// GPR89C	G protein-coupled receptor 89A /// G protein-coupled receptor 89B /// G protein-coupled receptor 89C	1.81846	2.55892	3.64124
242657_PM_at	---	---	2.47077	3.96137	3.634
229163_PM_at	CAMK2N1	calcium/calmodulin-dependent protein kinase II inhibitor 1	2.84929	2.21579	3.63359
218087_PM_s_at	SORBS1	sorbin and SH3 domain containing 1	2.64443	3.4746	3.63214
212660_PM_at	PHF15	PHD finger protein 15	2.05137	2.74664	3.62565
219790_PM_s_at	NPR3	natriuretic peptide receptor C/guanylate cyclase C (atrionatriuretic peptide receptor C)	4.96001	4.9517	3.61921
205357_PM_s_at	AGTR1	angiotensin II receptor, type 1	1.76549	2.4882	3.61433
220117_PM_at	ZNF385D	zinc finger protein 385D	0.882561	1.75098	3.60667
205817_PM_at	SIX1	SIX homeobox 1	2.60902	2.62387	3.55857
202669_PM_s_at	EFNB2	ephrin-B2	1.66496	1.89627	3.55667
225239_PM_at	---	---	1.68927	3.10816	3.54004
208485_PM_x_at	CFLAR	CASP8 and FADD-like apoptosis regulator	3.01187	3.00735	3.53885
224550_PM_s_at	MRVI1	murine retrovirus integration site 1 homolog	6.25629	4.15547	3.53687
228347_PM_at	SIX1	SIX homeobox 1	2.60727	3.17602	3.5203
224976_PM_at	NFIA	nuclear factor I/A	3.44227	4.22154	3.519
205500_PM_at	C5	complement component 5	2.53328	5.61386	3.50669
208892_PM_s_at	DUSP6	dual specificity phosphatase 6	0.926624	1.10831	3.50072
224339_PM_s_at	ANGPTL1	angiopoietin-like 1	1.49207	4.53194	3.49935
220122_PM_at	MCTP1	multiple C2 domains, transmembrane 1	1.53268	1.07954	3.49409
1557079_PM_at	ITGBL1	Integrin, beta-like 1 (with EGF-like repeat domains)	2.39888	2.13693	3.4646
205450_PM_at	PHKA1	phosphorylase kinase, alpha 1 (muscle)	1.08075	1.97113	3.43721
205119_PM_s_at	FPR1	formyl peptide receptor 1	2.70986	2.78305	3.42698
235849_PM_at	SCARA5	scavenger receptor class A, member 5 (putative)	0.885012	1.24171	3.4263
212573_PM_at	ENDOD1	endonuclease domain containing 1	3.30693	3.55224	3.42521
219789_PM_at	NPR3	natriuretic peptide receptor C/guanylate cyclase C (atrionatriuretic peptide receptor C)	5.0126	4.84686	3.42308
206756_PM_at	CHST7	carbohydrate (N-acetylglucosamine 6-O) sulfotransferase 7	3.0231	4.37342	3.42109
234051_PM_at	---	---	2.86497	3.16004	3.4157
204014_PM_at	DUSP4	dual specificity phosphatase 4	1.18342	1.21437	3.409
229060_PM_at	YPEL2	yippee-like 2 (Drosophila)	1.41637	1.36481	3.39693
241560_PM_at	---	---	0.818057	4.23399	3.39644
204719_PM_at	ABCA8	ATP-binding cassette, sub-family A (ABC1), member 8	3.30437	3.55097	3.3937
219773_PM_at	NOX4	NADPH oxidase 4	0.720529	0.5336	3.36489
227188_PM_at	C21orf63	chromosome 21 open reading frame 63	2.86332	3.47662	3.35956
229779_PM_at	COL4A4	collagen, type IV, alpha 4	2.17951	2.96895	3.34794
211806_PM_s_at	KCNJ15	potassium inwardly-rectifying channel, subfamily J, member 15	0.938652	1.48347	3.34494
220244_PM_at	LOH3CR2A	loss of heterozygosity, 3, chromosomal region 2, gene A	3.73941	2.5081	3.34074
207808_PM_s_at	PROS1	protein S (alpha)	1.15051	1.81075	3.33581
220486_PM_x_at	TMEM164	transmembrane protein 164	1.83771	2.72387	3.31308
236704_PM_at	---	---	1.1633	1.97366	3.31218
231098_PM_at	---	---	2.24449	2.76695	3.30996
223454_PM_at	CXCL16	chemokine (C-X-C motif) ligand 16	2.53035	3.81108	3.30896
209335_PM_at	DCN	decorin	2.0278	2.74486	3.30011
227826_PM_s_at	---	---	2.617	3.26774	3.2943
226665_PM_at	AHSA2	AHA1, activator of heat shock 90kDa protein ATPase homolog 2 (yeast)	1.42251	2.52232	3.26699
203680_PM_at	PRKAR2B	protein kinase, cAMP-dependent, regulatory, type II, beta	3.25718	3.40568	3.26385
226857_PM_at	ARHGEF19	Rho guanine nucleotide exchange factor (GEF) 19	2.537	3.00327	3.263
203143_PM_s_at	KIAA0040	KIAA0040	1.50369	1.60957	3.26201
224997_PM_x_at	H19	H19, imprinted maternally expressed transcript (non-protein coding)	1.59153	4.22842	3.26059
231001_PM_at	FIBIN	fin bud initiation factor homolog (zebrafish)	0.506643	2.32431	3.25049
210564_PM_x_at	CFLAR	CASP8 and FADD-like apoptosis regulator	2.84758	2.96028	3.23716
208893_PM_s_at	DUSP6	dual specificity phosphatase 6	0.846249	1.0667	3.23251
226034_PM_at	---	---	1.13793	1.04577	3.23228
229014_PM_at	FLJ42709	hypothetical LOC441094	1.98055	2.20462	3.22605
203453_PM_at	SCNN1A	sodium channel, nonvoltage-gated 1 alpha	2.50637	4.7309	3.22519
213182_PM_x_at	CDKN1C	cyclin-dependent kinase inhibitor 1C (p57, Kip2)	3.62735	3.56591	3.22348
201325_PM_s_at	EMP1	epithelial membrane protein 1	1.90752	2.45799	3.21724
221245_PM_s_at	FZD5	frizzled homolog 5 (Drosophila)	7.89041	5.54907	3.21391
243403_PM_x_at	CPM	carboxypeptidase M	3.32825	3.29154	3.21198
205476_PM_at	CCL20	chemokine (C-C motif) ligand 20	1.06498	1.03671	3.20861
235076_PM_at	CALCOCO2	calcium binding and coiled-coil domain 2	2.17031	2.41556	3.20826
204491_PM_at	PDE4D	phosphodiesterase 4D, cAMP-specific (phosphodiesterase E3 dunce homolog, Drosophila)	1.68207	5.14539	3.19751
214486_PM_x_at	CFLAR	CASP8 and FADD-like apoptosis regulator	2.54832	2.8479	3.19455
204575_PM_s_at	MMP19	matrix metallopeptidase 19	1.96297	2.46727	3.18031
52651_PM_at	COL8A2	collagen, type VIII, alpha 2	0.84364	1.49817	3.16905
204955_PM_at	SRPX	sushi-repeat-containing protein, X-linked	1.09388	1.60091	3.16743
242605_PM_at	---	---	4.07428	5.09597	3.16552
226953_PM_at	DARC	Duffy blood group, chemokine receptor	1.14509	1.92419	3.16068
220187_PM_at	STEAP4	STEAP family member 4	1.02109	3.26231	3.1522
209508_PM_x_at	CFLAR	CASP8 and FADD-like apoptosis regulator	2.54359	2.58005	3.12498
219610_PM_at	RGNEF	Rho-guanine nucleotide exchange factor	1.29487	1.09566	3.11407
238121_PM_at	GK5	glycerol kinase 5 (putative)	3.25657	3.84475	3.08718
221900_PM_at	COL8A2	collagen, type VIII, alpha 2	0.755831	1.43759	3.08406
203824_PM_at	TSPAN8	tetraspanin 8	0.99125	1.2663	3.08212
212758_PM_s_at	ZEB1	zinc finger E-box binding homeobox 1	1.97478	2.61614	3.08186
205645_PM_at	REPS2	RALBP1 associated Eps domain containing 2	1.01458	1.27352	3.0796
218665_PM_at	FZD4	frizzled homolog 4 (Drosophila)	3.17862	2.49717	3.07741
208070_PM_s_at	REV3L	REV3-like, catalytic subunit of DNA polymerase zeta (yeast)	1.92486	3.69898	3.05311
232090_PM_at	---	---	0.558108	1.26684	3.03605
209160_PM_at	AKR1C3	aldo-keto reductase family 1, member C3 (3-alpha hydroxysteroid dehydrogenase, type II)	0.61658	2.07883	3.02582
228325_PM_at	KIAA0146	KIAA0146	4.2507	5.39498	3.02218
1555103_PM_s_at	FGF7	fibroblast growth factor 7 (keratinocyte growth factor)	2.02772	3.49572	3.02073
212510_PM_at	GPD1L	glycerol-3-phosphate dehydrogenase 1-like	2.08415	2.88091	3.00775
226961_PM_at	PRR15	proline rich 15	3.62582	3.03033	2.9923
224596_PM_at	SLC44A1	solute carrier family 44, member 1	2.08994	2.57447	2.97488
204326_PM_x_at	MT1X	metallothionein 1X	2.0149	2.64805	2.93223
230051_PM_at	C10orf47	chromosome 10 open reading frame 47	3.33984	3.28253	2.89921
213256_PM_at	39875	membrane-associated ring finger (C3HC4) 3	0.895866	1.30646	2.89334
230660_PM_at	SERTAD4	SERTA domain containing 4	0.40494	0.759774	2.89076
212067_PM_s_at	C1R	complement component 1, r subcomponent	0.629049	1.64257	2.86551
208891_PM_at	DUSP6	dual specificity phosphatase 6	0.896371	1.00804	2.86113
201124_PM_at	ITGB5	integrin, beta 5	1.4076	1.26519	2.85626
203487_PM_s_at	ARMC8	armadillo repeat containing 8	2.42341	2.76347	2.8503
219681_PM_s_at	RAB11FIP1	RAB11 family interacting protein 1 (class I)	5.33466	4.35351	2.84985
223679_PM_at	CTNNB1	catenin (cadherin-associated protein), beta 1, 88kDa	2.29586	2.49332	2.84662
214297_PM_at	CSPG4	chondroitin sulfate proteoglycan 4	2.69446	3.02649	2.83768
213006_PM_at	CEBPD	CCAAT/enhancer binding protein (C/EBP), delta	4.05173	5.12365	2.83647
229801_PM_at	C10orf47	chromosome 10 open reading frame 47	2.77747	2.98032	2.83169
204472_PM_at	GEM	GTP binding protein overexpressed in skeletal muscle	1.22331	0.761076	2.82897
203424_PM_s_at	IGFBP5	insulin-like growth factor binding protein 5	0.0824385	1.32614	2.82832
1554741_PM_s_at	FGF7 /// KGFLP1 /// KGFLP2	fibroblast growth factor 7 (keratinocyte growth factor) /// keratinocyte growth factor-like protein 1 /// keratinocyte growth factor-like protein 2	2.04716	2.99625	2.82365
215001_PM_s_at	GLUL	glutamate-ammonia ligase (glutamine synthetase)	2.40027	2.39607	2.81909
208998_PM_at	UCP2	uncoupling protein 2 (mitochondrial, proton carrier)	2.47646	4.84175	2.81578
209732_PM_at	CLEC2B	C-type lectin domain family 2, member B	0.815471	0.980591	2.80511
222599_PM_s_at	NAV2	neuron navigator 2	3.10617	1.91719	2.80026
228507_PM_at	---	---	2.53829	3.81649	2.75812
210479_PM_s_at	RORA	RAR-related orphan receptor A	0.635403	1.40103	2.74544
226325_PM_at	ADSSL1	adenylosuccinate synthase like 1	1.05984	1.3303	2.74009
226682_PM_at	RORA	RAR-related orphan receptor A	0.696704	1.24647	2.7388
205403_PM_at	IL1R2	interleukin 1 receptor, type II	1.03521	2.69884	2.73228
202022_PM_at	ALDOC	aldolase C, fructose-bisphosphate	0.616902	1.34591	2.72478
211316_PM_x_at	CFLAR	CASP8 and FADD-like apoptosis regulator	2.59443	2.56926	2.71309
224595_PM_at	SLC44A1	solute carrier family 44, member 1	2.08846	2.53185	2.71114
225115_PM_at	HIPK2	homeodomain interacting protein kinase 2	1.94839	2.27151	2.70034
225116_PM_at	HIPK2	homeodomain interacting protein kinase 2	2.16253	2.63715	2.67741
243857_PM_at	MORF4L2	Mortality factor 4 like 2	2.71162	3.24098	2.66744
200884_PM_at	CKB	creatine kinase, brain	3.42507	3.72912	2.66172
204456_PM_s_at	GAS1	growth arrest-specific 1	1.98786	4.12948	2.66038
211965_PM_at	ZFP36L1	zinc finger protein 36, C3H type-like 1	0.987476	1.11691	2.6531
225097_PM_at	HIPK2	homeodomain interacting protein kinase 2	2.31357	2.52973	2.64302
224818_PM_at	SORT1	sortilin 1	3.44935	2.44942	2.61935
201531_PM_at	ZFP36	zinc finger protein 36, C3H type, homolog (mouse)	2.35966	2.31899	2.61849
212807_PM_s_at	SORT1	sortilin 1	3.88799	2.97334	2.59547
242086_PM_at	---	---	0.675199	1.19468	2.58283
210426_PM_x_at	RORA	RAR-related orphan receptor A	0.66669	1.3521	2.57101
219028_PM_at	HIPK2	homeodomain interacting protein kinase 2	2.36118	2.50658	2.56639
212235_PM_at	PLXND1	plexin D1	2.23584	2.1791	2.56317
226769_PM_at	FIBIN	fin bud initiation factor homolog (zebrafish)	0.547513	1.78142	2.54536
218574_PM_s_at	LMCD1	LIM and cysteine-rich domains 1	2.68315	2.19808	2.51484
1553194_PM_at	NEGR1	neuronal growth regulator 1	2.73016	1.62964	2.51409
221214_PM_s_at	NELF	nasal embryonic LHRH factor	3.23299	2.96161	2.51235
204290_PM_s_at	ALDH6A1	aldehyde dehydrogenase 6 family, member A1	2.03774	2.27265	2.51172
203836_PM_s_at	MAP3K5	mitogen-activated protein kinase kinase kinase 5	2.09814	1.89317	2.49842
225368_PM_at	HIPK2	homeodomain interacting protein kinase 2	1.97363	2.3463	2.49811
208581_PM_x_at	MT1X	metallothionein 1X	1.90476	2.32876	2.49346
235122_PM_at	HIVEP3	human immunodeficiency virus type I enhancer binding protein 3	4.39845	4.49104	2.48553
203812_PM_at	SLIT3	slit homolog 3 (Drosophila)	0.710753	1.19174	2.46001
223126_PM_s_at	C1orf21	chromosome 1 open reading frame 21	2.06456	3.00991	2.45406
231993_PM_at	ITGBL1	Integrin, beta-like 1 (with EGF-like repeat domains)	1.98396	2.06931	2.44669
210817_PM_s_at	CALCOCO2	calcium binding and coiled-coil domain 2	2.00076	2.2356	2.44185
213183_PM_s_at	CDKN1C	Cyclin-dependent kinase inhibitor 1C (p57, Kip2)	2.32158	2.29397	2.43792
1568598_PM_at	KAZALD1	Kazal-type serine peptidase inhibitor domain 1	4.04344	2.8556	2.43476
224261_PM_at	---	---	2.48657	2.82358	2.42753
220643_PM_s_at	FAIM	Fas apoptotic inhibitory molecule	2.00519	2.25529	2.4233
37996_PM_s_at	DMPK	dystrophia myotonica-protein kinase	2.53426	2.20481	2.40096
203234_PM_at	UPP1	uridine phosphorylase 1	0.618665	0.896495	2.39523
216874_PM_at	DKFZp686O1327	Hypothetical gene supported by BC043549; BX648102	1.01546	1.35325	2.37111
201700_PM_at	CCND3	cyclin D3	2.30834	2.76324	2.37016
202191_PM_s_at	GAS7	growth arrest-specific 7	0.678301	0.677247	2.36766
219443_PM_at	TASP1	taspase, threonine aspartase, 1	2.01014	4.03916	2.3557
202371_PM_at	TCEAL4	transcription elongation factor A (SII)-like 4	2.04298	2.40088	2.3538
229572_PM_at	ATP6V0A2	ATPase, H+ transporting, lysosomal V0 subunit a2	2.27143	2.09044	2.34783
228962_PM_at	PDE4D	phosphodiesterase 4D, cAMP-specific (phosphodiesterase E3 dunce homolog, Drosophila)	1.61893	4.20003	2.30944
229310_PM_at	KLHL29	kelch-like 29 (Drosophila)	2.08624	2.44201	2.30939
210563_PM_x_at	CFLAR	CASP8 and FADD-like apoptosis regulator	2.32095	2.36756	2.29941
206336_PM_at	CXCL6	chemokine (C-X-C motif) ligand 6 (granulocyte chemotactic protein 2)	0.864802	3.60931	2.29731
240897_PM_at	---	---	2.97682	2.86307	2.29691
209156_PM_s_at	COL6A2	collagen, type VI, alpha 2	0.846554	1.14029	2.2929
229674_PM_at	SERTAD4	SERTA domain containing 4	0.455197	0.732681	2.28125
210121_PM_at	B3GALT2	UDP-Gal:betaGlcNAc beta 1,3-galactosyltransferase, polypeptide 2	5.76134	3.16389	2.24634
205579_PM_at	HRH1	histamine receptor H1	0.742476	0.963573	2.23956
237400_PM_at	---	---	2.24746	2.5965	2.21468
203486_PM_s_at	ARMC8	armadillo repeat containing 8	2.40359	2.48257	2.19936
240556_PM_at	DCN	Decorin	2.3797	2.84825	2.19262
227404_PM_s_at	EGR1	Early growth response 1	0.917109	0.708315	2.18975
214660_PM_at	PELO	Pelota homolog (Drosophila)	3.46277	3.49622	2.18608
242767_PM_at	LMCD1	LIM and cysteine-rich domains 1	5.21734	3.39907	2.17929
219049_PM_at	CSGALNACT1	chondroitin sulfate N-acetylgalactosaminyltransferase 1	0.86548	3.21429	2.17053
214769_PM_at	CLCN4	chloride channel 4	0.443047	0.753681	2.15995
209939_PM_x_at	CFLAR	CASP8 and FADD-like apoptosis regulator	2.17573	2.38179	2.15938
206070_PM_s_at	EPHA3	EPH receptor A3	0.35742	1.0136	2.14601
201041_PM_s_at	DUSP1	dual specificity phosphatase 1	2.97673	2.23949	2.13999
205258_PM_at	INHBB	inhibin, beta B	0.773699	0.7056	2.13585
202450_PM_s_at	CTSK	cathepsin K	0.378113	0.453143	2.13238
222696_PM_at	AXIN2	axin 2	2.1602	2.46411	2.10596
207692_PM_s_at	ACAN	aggrecan	8.06282	2.30142	2.07697
230121_PM_at	C1orf133	chromosome 1 open reading frame 133	0.51492	0.894578	2.06004
205580_PM_s_at	HRH1	histamine receptor H1	0.669378	0.861591	2.05273
201502_PM_s_at	NFKBIA	nuclear factor of kappa light polypeptide gene enhancer in B-cells inhibitor, alpha	2.64553	2.38775	2.04376
217161_PM_x_at	ACAN	aggrecan	7.64808	2.13793	2.03972
204114_PM_at	NID2	nidogen 2 (osteonidogen)	2.74257	2.53852	2.03198
221911_PM_at	ETV1	ets variant 1	0.47862	0.723306	2.01635
218484_PM_at	NDUFA4L2	NADH dehydrogenase (ubiquinone) 1 alpha subcomplex, 4-like 2	0.411415	0.73864	1.96839
217452_PM_s_at	B3GALT2	UDP-Gal:betaGlcNAc beta 1,3-galactosyltransferase, polypeptide 2	5.3878	2.6818	1.94041
205679_PM_x_at	ACAN	aggrecan	6.7117	1.99989	1.93378
211742_PM_s_at	EVI2B	ecotropic viral integration site 2B	0.442883	0.804543	1.91894
226814_PM_at	ADAMTS9	ADAM metallopeptidase with thrombospondin type 1 motif, 9	3.63097	4.20703	1.89901
209212_PM_s_at	KLF5	Kruppel-like factor 5 (intestinal)	4.60288	1.95406	1.87407
221541_PM_at	CRISPLD2	cysteine-rich secretory protein LCCL domain containing 2	3.1319	3.25601	1.68835
212670_PM_at	ELN	elastin	4.61437	2.87354	1.68081
225571_PM_at	LIFR	leukemia inhibitory factor receptor alpha	1.09274	3.22301	1.65642
223658_PM_at	KCNK6	potassium channel, subfamily K, member 6	4.08796	2.34318	1.64962
214023_PM_x_at	TUBB2B	tubulin, beta 2B	1.25421	3.38788	1.64087
1555997_PM_s_at	IGFBP5	insulin-like growth factor binding protein 5	0.287958	0.83005	1.62553
205792_PM_at	WISP2	WNT1 inducible signaling pathway protein 2	0.192382	0.400447	1.61462
203477_PM_at	COL15A1	collagen, type XV, alpha 1	0.327819	0.475484	1.61327
239336_PM_at	THBS1	Thrombospondin 1	3.89975	2.06426	1.60569
211958_PM_at	IGFBP5	insulin-like growth factor binding protein 5	0.219836	0.799095	1.59135
211959_PM_at	IGFBP5	insulin-like growth factor binding protein 5	0.191889	1.0487	1.5908
209211_PM_at	KLF5	Kruppel-like factor 5 (intestinal)	3.95237	2.08977	1.58346
220639_PM_at	TM4SF20	transmembrane 4 L six family member 20	1.90113	4.05432	1.53998
206025_PM_s_at	TNFAIP6	tumor necrosis factor, alpha-induced protein 6	0.20734	0.640425	1.51189
201625_PM_s_at	INSIG1	insulin induced gene 1	0.466339	1.67138	1.50478

## Sheet: 10days down (1.5 fold)
Probe set	Symbol	Gene title	Fold change day 2/day0	Fold change day 5/day1	Fold change day 10/day2
202350_PM_s_at	MATN2	matrilin 2	0.316953	0.316261	0.601885
205733_PM_at	BLM	Bloom syndrome, RecQ helicase-like	2.23552	1.58703	0.596301
1552658_PM_a_at	NAV3	neuron navigator 3	2.79476	0.914509	0.594259
201755_PM_at	MCM5	minichromosome maintenance complex component 5	2.22857	1.41172	0.592858
227117_PM_at	---	---	0.366836	0.44189	0.592754
203362_PM_s_at	MAD2L1	MAD2 mitotic arrest deficient-like 1 (yeast)	1.69734	1.65762	0.590696
205132_PM_at	ACTC1	actin, alpha, cardiac muscle 1	5.67433	2.28504	0.587066
202627_PM_s_at	SERPINE1	serpin peptidase inhibitor, clade E (nexin, plasminogen activator inhibitor type 1), member 1	0.695379	0.197561	0.584248
212023_PM_s_at	MKI67	antigen identified by monoclonal antibody Ki-67	2.37538	1.78838	0.582408
209891_PM_at	SPC25	SPC25, NDC80 kinetochore complex component, homolog (S. cerevisiae)	2.04988	1.78379	0.581343
206614_PM_at	GDF5	growth differentiation factor 5	0.19746	0.593463	0.573297
228890_PM_at	ATOH8	atonal homolog 8 (Drosophila)	3.93362	0.872319	0.570022
201761_PM_at	MTHFD2	methylenetetrahydrofolate dehydrogenase (NADP+ dependent) 2, methenyltetrahydrofolate cyclohydrolase	0.3102	0.365679	0.567001
236313_PM_at	CDKN2B	cyclin-dependent kinase inhibitor 2B (p15, inhibits CDK4)	0.233152	0.16801	0.564487
228298_PM_at	FAM113B	family with sequence similarity 113, member B	0.64499	0.298824	0.557662
212020_PM_s_at	MKI67	antigen identified by monoclonal antibody Ki-67	2.4694	1.34903	0.553862
205194_PM_at	PSPH	phosphoserine phosphatase	0.23569	0.309079	0.552262
235548_PM_at	APCDD1L	adenomatosis polyposis coli down-regulated 1-like	0.466378	0.366328	0.551832
207826_PM_s_at	ID3	inhibitor of DNA binding 3, dominant negative helix-loop-helix protein	3.50225	1.38297	0.551596
226847_PM_at	FST	follistatin	0.3249	0.209603	0.551223
229450_PM_at	IFIT3	interferon-induced protein with tetratricopeptide repeats 3	0.34576	0.44367	0.548595
202834_PM_at	AGT	angiotensinogen (serpin peptidase inhibitor, clade A, member 8)	0.166707	0.168702	0.546234
225720_PM_at	SYNPO2	synaptopodin 2	2.34276	1.46083	0.545097
219529_PM_at	CLIC3	chloride intracellular channel 3	2.56858	1.03179	0.544566
203276_PM_at	LMNB1	lamin B1	2.07267	1.64937	0.544437
204709_PM_s_at	KIF23	kinesin family member 23	1.75005	1.42173	0.543941
228582_PM_x_at	---	---	2.08413	0.822524	0.543638
221865_PM_at	C9orf91	chromosome 9 open reading frame 91	0.349363	0.377524	0.543007
1553535_PM_a_at	RANGAP1	Ran GTPase activating protein 1	1.94024	0.879176	0.542903
227696_PM_at	LOC440345 /// LOC440354 /// LOC595101 /// LOC641298 /// SMG1	hypothetical protein LOC440345 /// PI-3-kinase-related kinase SMG-1 pseudogene /// PI-3-kinase-related kinase SMG-1 pseudogene /// SMG1 homolog, phosphatidylinositol 3-kinase-related kinase pseudogene /// SMG1 homolog, phosphatidylinositol 3-kinase-related kinase (C. elegans)	0.33268	0.352718	0.537126
228737_PM_at	TOX2	TOX high mobility group box family member 2	0.427927	0.383103	0.537091
1558044_PM_s_at	EXOSC6	exosome component 6	0.410017	0.357844	0.533161
209840_PM_s_at	LRRN3	leucine rich repeat neuronal 3	1.79001	0.408835	0.523011
204337_PM_at	RGS4	regulator of G-protein signaling 4	0.45685	0.289324	0.521751
206584_PM_at	LY96	lymphocyte antigen 96	0.2796	0.332271	0.520065
226610_PM_at	CENPV	centromere protein V	2.69805	1.26581	0.513976
200924_PM_s_at	SLC3A2	solute carrier family 3 (activators of dibasic and neutral amino acid transport), member 2	0.218424	0.212684	0.510745
204948_PM_s_at	FST	follistatin	0.31346	0.20033	0.510061
219270_PM_at	CHAC1	ChaC, cation transport regulator homolog 1 (E. coli)	0.11306	0.124352	0.50986
212171_PM_x_at	VEGFA	vascular endothelial growth factor A	0.180754	0.247794	0.505145
205798_PM_at	IL7R	interleukin 7 receptor	3.18797	1.05129	0.504877
229202_PM_at	---	---	0.411008	0.429632	0.503108
220892_PM_s_at	PSAT1	phosphoserine aminotransferase 1	0.0635633	0.166504	0.502749
210983_PM_s_at	MCM7	minichromosome maintenance complex component 7	1.74549	1.25171	0.502366
228635_PM_at	PCDH10	protocadherin 10	0.761005	0.370839	0.496338
206632_PM_s_at	APOBEC3B	apolipoprotein B mRNA editing enzyme, catalytic polypeptide-like 3B	2.01378	1.65391	0.495974
226933_PM_s_at	LOC100287917	hypothetical protein LOC100287917	2.65811	0.916197	0.494807
231894_PM_at	---	---	0.301008	0.335606	0.489019
37028_PM_at	PPP1R15A	protein phosphatase 1, regulatory (inhibitor) subunit 15A	0.415149	0.315252	0.483953
217998_PM_at	LOC100289208 /// PHLDA1	hypothetical protein LOC100289208 /// pleckstrin homology-like domain, family A, member 1	0.219189	0.264123	0.482235
211527_PM_x_at	VEGFA	vascular endothelial growth factor A	0.148928	0.22004	0.479231
204268_PM_at	S100A2	S100 calcium binding protein A2	0.315953	0.401822	0.478431
225842_PM_at	PHLDA1	pleckstrin homology-like domain, family A, member 1	0.151611	0.270784	0.477407
221584_PM_s_at	KCNMA1	potassium large conductance calcium-activated channel, subfamily M, alpha member 1	0.396861	0.340037	0.476693
222680_PM_s_at	DTL	denticleless homolog (Drosophila)	2.36113	1.29432	0.476112
220651_PM_s_at	MCM10	minichromosome maintenance complex component 10	2.13799	1.23274	0.471671
232027_PM_at	SYNE1	spectrin repeat containing, nuclear envelope 1	1.55566	0.52337	0.471142
235471_PM_at	C10orf72	chromosome 10 open reading frame 72	0.416147	0.4054	0.470376
235089_PM_at	FBXL20	F-box and leucine-rich repeat protein 20	0.438456	0.430712	0.468602
221050_PM_s_at	GTPBP2	GTP binding protein 2	0.471026	0.430877	0.467784
225817_PM_at	CGNL1	cingulin-like 1	0.303928	0.253111	0.46348
242414_PM_at	QPRT	quinolinate phosphoribosyltransferase	0.301843	0.446237	0.463295
202363_PM_at	SPOCK1	sparc/osteonectin, cwcv and kazal-like domains proteoglycan (testican) 1	0.485805	0.405155	0.463157
224837_PM_at	FOXP1	forkhead box P1	0.4957	0.416403	0.46293
209017_PM_s_at	LONP1	lon peptidase 1, mitochondrial	0.423939	0.458058	0.462346
214285_PM_at	FABP3	fatty acid binding protein 3, muscle and heart (mammary-derived growth inhibitor)	0.255686	0.311735	0.458039
213281_PM_at	LOC100288387	similar to c-jun	0.379213	0.28764	0.456877
221258_PM_s_at	KIF18A	kinesin family member 18A	1.51458	0.925373	0.452732
205738_PM_s_at	FABP3	fatty acid binding protein 3, muscle and heart (mammary-derived growth inhibitor)	0.234751	0.32499	0.452024
214164_PM_x_at	CA12	carbonic anhydrase XII	0.288752	0.312202	0.451068
228846_PM_at	MXD1	MAX dimerization protein 1	0.35351	0.431962	0.450494
215867_PM_x_at	CA12	carbonic anhydrase XII	0.289417	0.301715	0.450322
223769_PM_x_at	HYI	hydroxypyruvate isomerase homolog (E. coli)	0.405913	0.433028	0.448115
230099_PM_at	---	---	0.858871	0.393887	0.447399
1554544_PM_a_at	MBP	myelin basic protein	0.329137	0.430395	0.446191
218692_PM_at	GOLSYN	Golgi-localized protein	0.291178	0.384441	0.445375
229800_PM_at	DCLK1	Doublecortin-like kinase 1	0.353537	0.40398	0.444604
221435_PM_x_at	HYI	hydroxypyruvate isomerase homolog (E. coli)	0.402768	0.384835	0.44447
210513_PM_s_at	VEGFA	vascular endothelial growth factor A	0.124233	0.162465	0.442464
224838_PM_at	FOXP1	forkhead box P1	0.517156	0.405557	0.442228
228573_PM_at	ANTXR2	anthrax toxin receptor 2	0.483517	0.36716	0.439962
223195_PM_s_at	SESN2	sestrin 2	0.202855	0.27234	0.43958
203304_PM_at	BAMBI	BMP and activin membrane-bound inhibitor homolog (Xenopus laevis)	1.8269	0.790486	0.439442
209682_PM_at	CBLB	Cas-Br-M (murine) ecotropic retroviral transforming sequence b	0.389385	0.380943	0.439358
228407_PM_at	SCUBE3	signal peptide, CUB domain, EGF-like 3	2.51899	0.97141	0.435431
235256_PM_s_at	GALM	galactose mutarotase (aldose 1-epimerase)	0.441252	0.390823	0.433439
1552275_PM_s_at	PXK	PX domain containing serine/threonine kinase	0.260277	0.26465	0.433418
210935_PM_s_at	WDR1	WD repeat domain 1	1.50253	0.851348	0.433381
225285_PM_at	BCAT1	branched chain aminotransferase 1, cytosolic	0.481649	0.489326	0.431686
201464_PM_x_at	JUN	jun oncogene	0.387491	0.243204	0.429367
223196_PM_s_at	SESN2	sestrin 2	0.224626	0.278515	0.429273
226517_PM_at	BCAT1	branched chain aminotransferase 1, cytosolic	0.503156	0.43236	0.428503
204879_PM_at	PDPN	podoplanin	0.381766	0.362083	0.42846
202998_PM_s_at	LOXL2	lysyl oxidase-like 2	0.448162	0.317176	0.427216
205122_PM_at	TMEFF1	transmembrane protein with EGF-like and two follistatin-like domains 1	0.430867	0.323683	0.426182
234951_PM_s_at	COL12A1	collagen, type XII, alpha 1	1.8961	0.656343	0.425026
227337_PM_at	ANKRD37	ankyrin repeat domain 37	0.193174	0.241156	0.424994
213169_PM_at	SEMA5A	sema domain, seven thrombospondin repeats (type 1 and type 1-like), transmembrane domain (TM) and short cytoplasmic domain, (semaphorin) 5A	0.336729	0.26303	0.42404
201116_PM_s_at	CPE	carboxypeptidase E	0.364592	0.270099	0.423905
204203_PM_at	CEBPG	CCAAT/enhancer binding protein (C/EBP), gamma	0.404431	0.349903	0.423558
205856_PM_at	SLC14A1	solute carrier family 14 (urea transporter), member 1 (Kidd blood group)	0.587002	0.162864	0.420031
218853_PM_s_at	MOSPD1	motile sperm domain containing 1	0.470866	0.469423	0.418516
234976_PM_x_at	SLC4A5	Solute carrier family 4, sodium bicarbonate cotransporter, member 5	0.279753	0.303752	0.418038
203628_PM_at	IGF1R	insulin-like growth factor 1 receptor	1.73102	0.516078	0.415291
202936_PM_s_at	SOX9	SRY (sex determining region Y)-box 9	0.279606	0.233886	0.415089
229554_PM_at	---	---	0.321973	0.344575	0.414723
209205_PM_s_at	LMO4	LIM domain only 4	0.388552	0.383089	0.413544
227705_PM_at	TCEAL7	transcription elongation factor A (SII)-like 7	0.440347	0.446776	0.410624
209204_PM_at	LMO4	LIM domain only 4	0.419729	0.388999	0.409211
230275_PM_at	ARSI	arylsulfatase family, member I	0.495357	0.404435	0.408654
205405_PM_at	SEMA5A	sema domain, seven thrombospondin repeats (type 1 and type 1-like), transmembrane domain (TM) and short cytoplasmic domain, (semaphorin) 5A	0.39855	0.27405	0.408649
223622_PM_s_at	HYI	hydroxypyruvate isomerase homolog (E. coli)	0.367273	0.383508	0.407489
226611_PM_s_at	CENPV	centromere protein V	2.93981	1.25237	0.406911
218451_PM_at	CDCP1	CUB domain containing protein 1	0.42693	0.394369	0.405604
1560879_PM_a_at	SYT15	synaptotagmin XV	1.90079	0.646185	0.405206
230290_PM_at	SCUBE3	signal peptide, CUB domain, EGF-like 3	2.94082	0.722492	0.40367
219877_PM_at	ZMAT4	zinc finger, matrin type 4	0.426241	0.481136	0.402204
221898_PM_at	PDPN	podoplanin	0.360082	0.354486	0.400884
204194_PM_at	BACH1	BTB and CNC homology 1, basic leucine zipper transcription factor 1	0.329208	0.328172	0.400196
207345_PM_at	FST	follistatin	0.258412	0.168529	0.399687
1553972_PM_a_at	CBS	cystathionine-beta-synthase	0.204992	0.260518	0.397436
204339_PM_s_at	RGS4	regulator of G-protein signaling 4	0.445622	0.23954	0.397426
224797_PM_at	ARRDC3	arrestin domain containing 3	0.424743	0.568641	0.397162
203665_PM_at	HMOX1	heme oxygenase (decycling) 1	0.532297	0.277185	0.396547
229382_PM_at	C1orf183	chromosome 1 open reading frame 183	0.280755	0.371301	0.396395
224583_PM_at	COTL1	coactosin-like 1 (Dictyostelium)	1.16966	0.668993	0.396157
209822_PM_s_at	VLDLR	very low density lipoprotein receptor	0.208218	0.296577	0.39583
232080_PM_at	HECW2	HECT, C2 and WW domain containing E3 ubiquitin protein ligase 2	0.449755	0.367825	0.395631
223062_PM_s_at	PSAT1	phosphoserine aminotransferase 1	0.0710427	0.181369	0.395428
227140_PM_at	---	---	0.474843	0.268452	0.394771
226218_PM_at	IL7R	interleukin 7 receptor	2.97389	1.11789	0.394547
210461_PM_s_at	ABLIM1	actin binding LIM protein 1	0.392396	0.447653	0.394266
1552365_PM_at	SCIN	scinderin	0.384414	0.337108	0.393441
218145_PM_at	TRIB3	tribbles homolog 3 (Drosophila)	0.103268	0.139355	0.393102
209884_PM_s_at	SLC4A7	solute carrier family 4, sodium bicarbonate cotransporter, member 7	0.533811	0.392493	0.392938
215440_PM_s_at	BEX4	brain expressed, X-linked 4	0.429908	0.356879	0.391624
202158_PM_s_at	CUGBP2	CUG triplet repeat, RNA binding protein 2	0.289673	0.288853	0.391312
222773_PM_s_at	GALNT12	UDP-N-acetyl-alpha-D-galactosamine:polypeptide N-acetylgalactosaminyltransferase 12 (GalNAc-T12)	0.364517	0.33156	0.390429
230800_PM_at	ADCY4	adenylate cyclase 4	1.17084	0.842114	0.389047
227875_PM_at	KLHL13	kelch-like 13 (Drosophila)	1.42613	1.02083	0.388859
241404_PM_at	---	---	0.489317	0.380697	0.388351
206039_PM_at	RAB33A	RAB33A, member RAS oncogene family	0.344832	0.364726	0.388255
217127_PM_at	CTH	cystathionase (cystathionine gamma-lyase)	0.207246	0.300652	0.386745
209435_PM_s_at	ARHGEF2	Rho/Rac guanine nucleotide exchange factor (GEF) 2	0.284936	0.297282	0.38673
209292_PM_at	ID4	Inhibitor of DNA binding 4, dominant negative helix-loop-helix protein	3.05389	1.2407	0.383901
229151_PM_at	SLC14A1	solute carrier family 14 (urea transporter), member 1 (Kidd blood group)	0.476823	0.110112	0.383195
226013_PM_at	TRAK1	trafficking protein, kinesin binding 1	0.545426	0.326233	0.382395
205966_PM_at	TAF13	TAF13 RNA polymerase II, TATA box binding protein (TBP)-associated factor, 18kDa	0.890775	0.609314	0.38187
207011_PM_s_at	PTK7	PTK7 protein tyrosine kinase 7	0.465134	0.394423	0.380665
202157_PM_s_at	CUGBP2	CUG triplet repeat, RNA binding protein 2	0.259434	0.252594	0.380147
227764_PM_at	LYPD6	LY6/PLAUR domain containing 6	1.19691	0.777415	0.37858
227900_PM_at	CBLB	Cas-Br-M (murine) ecotropic retroviral transforming sequence b	0.278899	0.331308	0.376441
232484_PM_at	---	---	0.440523	0.313735	0.376398
228740_PM_at	---	---	0.378197	0.315882	0.375538
227320_PM_at	FAM101A	family with sequence similarity 101, member A	0.370281	0.34734	0.375363
236565_PM_s_at	LARP6	La ribonucleoprotein domain family, member 6	0.511411	0.372473	0.375233
203505_PM_at	ABCA1	ATP-binding cassette, sub-family A (ABC1), member 1	0.258893	0.49909	0.374682
207980_PM_s_at	CITED2	Cbp/p300-interacting transactivator, with Glu/Asp-rich carboxy-terminal domain, 2	1.40397	0.813033	0.374639
221854_PM_at	PKP1	plakophilin 1 (ectodermal dysplasia/skin fragility syndrome)	0.387388	0.31071	0.373652
229055_PM_at	GPR68	G protein-coupled receptor 68	0.346851	0.247887	0.373394
1561615_PM_s_at	SLC8A1	solute carrier family 8 (sodium/calcium exchanger), member 1	0.654611	0.312951	0.372086
227198_PM_at	AFF3	AF4/FMR2 family, member 3	0.357925	0.350008	0.371956
229581_PM_at	ELFN1	extracellular leucine-rich repeat and fibronectin type III domain containing 1	0.440499	0.298602	0.370438
201397_PM_at	PHGDH	phosphoglycerate dehydrogenase	0.140546	0.329409	0.370305
205251_PM_at	PER2	period homolog 2 (Drosophila)	0.336244	0.365467	0.368851
228438_PM_at	LOC100132891	Hypothetical protein LOC100132891	0.24811	0.296263	0.367892
204508_PM_s_at	CA12	carbonic anhydrase XII	0.233363	0.231039	0.367139
211681_PM_s_at	PDLIM5	PDZ and LIM domain 5	1.61173	0.641066	0.365665
218934_PM_s_at	HSPB7	heat shock 27kDa protein family, member 7 (cardiovascular)	1.52298	0.421215	0.365645
230175_PM_s_at	---	---	0.531441	0.416976	0.363486
217996_PM_at	PHLDA1	pleckstrin homology-like domain, family A, member 1	0.167829	0.221199	0.360919
223754_PM_at	C2orf88	chromosome 2 open reading frame 88	1.47049	0.708412	0.36082
201829_PM_at	NET1	neuroepithelial cell transforming 1	0.414755	0.296304	0.360521
202156_PM_s_at	CUGBP2	CUG triplet repeat, RNA binding protein 2	0.328856	0.263919	0.360002
235236_PM_at	LOC100131897	Uncharacterized protein LOC100131897	0.384335	0.182209	0.359515
AFFX-HUMRGE/M10098_5_at	---	---	1.07864	0.59213	0.359078
228128_PM_x_at	PAPPA	pregnancy-associated plasma protein A, pappalysin 1	0.815835	0.874828	0.358578
225768_PM_at	NR1D2	nuclear receptor subfamily 1, group D, member 2	0.271388	0.21242	0.358143
236344_PM_at	PDE1C	phosphodiesterase 1C, calmodulin-dependent 70kDa	0.504973	0.317349	0.358068
209291_PM_at	ID4	inhibitor of DNA binding 4, dominant negative helix-loop-helix protein	1.87825	0.807111	0.357686
203963_PM_at	CA12	carbonic anhydrase XII	0.25719	0.241895	0.357593
209293_PM_x_at	ID4	inhibitor of DNA binding 4, dominant negative helix-loop-helix protein	2.16878	0.969439	0.357471
218980_PM_at	FHOD3	formin homology 2 domain containing 3	0.417682	0.441208	0.356954
232122_PM_s_at	VEPH1	ventricular zone expressed PH domain homolog 1 (zebrafish)	0.373638	0.403326	0.356134
237248_PM_at	PDE11A	phosphodiesterase 11A	0.308935	0.306149	0.355957
223484_PM_at	C15orf48	chromosome 15 open reading frame 48	0.28913	0.311413	0.35434
209016_PM_s_at	KRT7	keratin 7	1.64616	1.01074	0.353398
209369_PM_at	ANXA3	annexin A3	0.423576	0.402712	0.352929
1568868_PM_at	CYP27C1	cytochrome P450, family 27, subfamily C, polypeptide 1	0.527339	0.36563	0.352381
220817_PM_at	TRPC4	transient receptor potential cation channel, subfamily C, member 4	0.396799	0.363416	0.351876
203069_PM_at	SV2A	synaptic vesicle glycoprotein 2A	0.369544	0.392558	0.351465
1555788_PM_a_at	TRIB3	tribbles homolog 3 (Drosophila)	0.207382	0.248712	0.350206
206307_PM_s_at	FOXD1	forkhead box D1	0.428522	0.285966	0.34968
231911_PM_at	ERMN	ermin, ERM-like protein	0.328294	0.379168	0.348901
1553565_PM_s_at	DDAH1	dimethylarginine dimethylaminohydrolase 1	1.50851	0.408255	0.348626
226537_PM_at	HINT3	histidine triad nucleotide binding protein 3	0.408138	0.39205	0.34858
209760_PM_at	KIAA0922	KIAA0922	0.471977	0.394757	0.348562
231882_PM_at	DUXAP10 /// FLJ39632	double homeobox A pseudogene 10 /// hypothetical LOC642477	0.57809	0.329692	0.348556
219523_PM_s_at	ODZ3	odz, odd Oz/ten-m homolog 3 (Drosophila)	0.368946	0.330227	0.348048
201310_PM_s_at	C5orf13	chromosome 5 open reading frame 13	0.994871	0.732042	0.347633
215177_PM_s_at	ITGA6	integrin, alpha 6	0.997128	0.931119	0.347633
207629_PM_s_at	ARHGEF2	Rho/Rac guanine nucleotide exchange factor (GEF) 2	0.327769	0.269789	0.347508
204338_PM_s_at	RGS4	regulator of G-protein signaling 4	0.454243	0.202982	0.346765
203951_PM_at	CNN1	calponin 1, basic, smooth muscle	1.03096	0.966558	0.345369
212769_PM_at	TLE3	transducin-like enhancer of split 3 (E(sp1) homolog, Drosophila)	0.497292	0.369445	0.345054
226001_PM_at	KLHL5	kelch-like 5 (Drosophila)	0.440938	0.451966	0.344931
202207_PM_at	ARL4C	ADP-ribosylation factor-like 4C	0.108717	0.173297	0.344539
203440_PM_at	CDH2	cadherin 2, type 1, N-cadherin (neuronal)	0.566274	0.35989	0.343405
218627_PM_at	DRAM1	DNA-damage regulated autophagy modulator 1	0.373437	0.311812	0.342531
201465_PM_s_at	JUN	jun oncogene	0.339806	0.193983	0.342485
229844_PM_at	---	---	0.399317	0.321843	0.342314
218880_PM_at	FOSL2	FOS-like antigen 2	0.919256	0.806367	0.341568
1555480_PM_a_at	FBLIM1	filamin binding LIM protein 1	1.05605	0.474979	0.341159
205805_PM_s_at	ROR1	receptor tyrosine kinase-like orphan receptor 1	1.6844	0.611735	0.340866
224940_PM_s_at	PAPPA	pregnancy-associated plasma protein A, pappalysin 1	0.840442	0.831752	0.340415
222903_PM_s_at	CPEB1	cytoplasmic polyadenylation element binding protein 1	0.302134	0.323603	0.340212
1552457_PM_a_at	ADAMTSL1	ADAMTS-like 1	0.580656	0.439312	0.338983
225496_PM_s_at	SYTL2	synaptotagmin-like 2	0.97344	0.682947	0.337901
228195_PM_at	C2orf88	chromosome 2 open reading frame 88	2.10521	0.849136	0.337029
236532_PM_at	C11orf87	chromosome 11 open reading frame 87	1.68273	0.993774	0.336999
241337_PM_at	---	---	0.450833	0.420918	0.335188
214866_PM_at	PLAUR	plasminogen activator, urokinase receptor	0.43698	0.406695	0.334546
237215_PM_s_at	TFRC	transferrin receptor (p90, CD71)	0.479624	0.366166	0.334208
219064_PM_at	ITIH5	inter-alpha (globulin) inhibitor H5	0.286761	0.306623	0.333435
201466_PM_s_at	JUN	jun oncogene	0.278387	0.177573	0.333016
242546_PM_at	FLJ39632	hypothetical LOC642477	0.48135	0.357455	0.331184
208614_PM_s_at	FLNB	filamin B, beta	0.945945	0.584262	0.330722
203967_PM_at	CDC6	cell division cycle 6 homolog (S. cerevisiae)	1.43509	0.841625	0.325981
230424_PM_at	C5orf13	chromosome 5 open reading frame 13	1.39255	0.490479	0.325479
AFFX-HUMRGE/M10098_M_at	---	---	1.18008	0.488896	0.325111
224937_PM_at	PTGFRN	prostaglandin F2 receptor negative regulator	0.449454	0.423336	0.324911
226930_PM_at	FNDC1	fibronectin type III domain containing 1	0.709058	0.83156	0.323489
238419_PM_at	PHLDB2	pleckstrin homology-like domain, family B, member 2	0.445106	0.370424	0.323488
204401_PM_at	KCNN4	potassium intermediate/small conductance calcium-activated channel, subfamily N, member 4	0.354094	0.291106	0.321879
209396_PM_s_at	CHI3L1	chitinase 3-like 1 (cartilage glycoprotein-39)	0.0675679	0.129529	0.32123
209921_PM_at	SLC7A11	solute carrier family 7, (cationic amino acid transporter, y+ system) member 11	0.0850998	0.234522	0.319838
217997_PM_at	PHLDA1	pleckstrin homology-like domain, family A, member 1	0.130789	0.163177	0.319583
234994_PM_at	TMEM200A	transmembrane protein 200A	0.539348	0.289316	0.318815
204926_PM_at	INHBA	inhibin, beta A	0.469502	0.262109	0.318647
204726_PM_at	CDH13	cadherin 13, H-cadherin (heart)	0.508038	0.336366	0.318253
203504_PM_s_at	ABCA1	ATP-binding cassette, sub-family A (ABC1), member 1	0.216383	0.41543	0.317729
225864_PM_at	FAM84B	family with sequence similarity 84, member B	0.395804	0.331325	0.316704
225464_PM_at	FRMD6	FERM domain containing 6	0.611372	0.378903	0.315517
226302_PM_at	ATP8B1	ATPase, class I, type 8B, member 1	0.555123	0.286019	0.315293
211708_PM_s_at	SCD	stearoyl-CoA desaturase (delta-9-desaturase)	0.246014	0.322499	0.315211
205266_PM_at	LIF	leukemia inhibitory factor (cholinergic differentiation factor)	0.29537	0.206621	0.314936
1558080_PM_s_at	DNAJC3	DnaJ (Hsp40) homolog, subfamily C, member 3	1.00088	0.526788	0.314674
226989_PM_at	RGMB	RGM domain family, member B	0.371536	0.306384	0.313217
220161_PM_s_at	EPB41L4B	erythrocyte membrane protein band 4.1 like 4B	2.13299	0.627354	0.312167
205123_PM_s_at	TMEFF1	transmembrane protein with EGF-like and two follistatin-like domains 1	0.403201	0.290154	0.31173
202986_PM_at	ARNT2	aryl-hydrocarbon receptor nuclear translocator 2	0.630169	0.289905	0.310331
209946_PM_at	VEGFC	vascular endothelial growth factor C	0.643894	0.253298	0.309831
219308_PM_s_at	AK5	adenylate kinase 5	0.317429	0.298786	0.309533
205051_PM_s_at	KIT	v-kit Hardy-Zuckerman 4 feline sarcoma viral oncogene homolog	0.415555	0.388552	0.309474
211091_PM_s_at	NF2	neurofibromin 2 (merlin)	1.06453	0.378766	0.308778
214085_PM_x_at	GLIPR1	GLI pathogenesis-related 1	0.872852	0.533598	0.3084
224941_PM_at	PAPPA	pregnancy-associated plasma protein A, pappalysin 1	0.811628	0.769474	0.308279
204221_PM_x_at	GLIPR1	GLI pathogenesis-related 1	0.903653	0.526745	0.307808
205006_PM_s_at	NMT2	N-myristoyltransferase 2	0.466241	0.372604	0.307506
210762_PM_s_at	DLC1	deleted in liver cancer 1	0.620376	0.300218	0.306705
222780_PM_s_at	BAALC	brain and acute leukemia, cytoplasmic	0.322546	0.244576	0.306288
203716_PM_s_at	DPP4	dipeptidyl-peptidase 4	0.413739	0.220593	0.305951
227014_PM_at	ASPHD2	aspartate beta-hydroxylase domain containing 2	0.442153	0.332304	0.305512
235521_PM_at	HOXA3	homeobox A3	0.319128	0.351697	0.305165
206215_PM_at	OPCML	opioid binding protein/cell adhesion molecule-like	0.330075	0.342966	0.30412
1564494_PM_s_at	P4HB	prolyl 4-hydroxylase, beta polypeptide	0.878567	0.588825	0.303657
206924_PM_at	IL11	interleukin 11	0.272108	0.212939	0.302983
209395_PM_at	CHI3L1	chitinase 3-like 1 (cartilage glycoprotein-39)	0.0635775	0.125837	0.302679
230090_PM_at	LOC100287032	similar to hCG2006445	0.315926	0.233269	0.302056
244561_PM_at	---	---	0.496669	0.364754	0.302024
212143_PM_s_at	IGFBP3	insulin-like growth factor binding protein 3	0.590149	0.256968	0.301044
211478_PM_s_at	DPP4	dipeptidyl-peptidase 4	0.340026	0.311548	0.3005
225283_PM_at	ARRDC4	arrestin domain containing 4	0.759854	1.01002	0.299369
200629_PM_at	WARS	tryptophanyl-tRNA synthetase	0.207565	0.282747	0.299172
214078_PM_at	---	---	0.548175	0.701313	0.298892
223287_PM_s_at	FOXP1	forkhead box P1	0.486034	0.329765	0.297948
244503_PM_at	---	---	0.807222	0.297785	0.297462
213603_PM_s_at	RAC2	ras-related C3 botulinum toxin substrate 2 (rho family, small GTP binding protein Rac2)	0.810315	0.537875	0.2972
202847_PM_at	PCK2	phosphoenolpyruvate carboxykinase 2 (mitochondrial)	0.12849	0.17566	0.296654
239650_PM_at	NCKAP5	NCK-associated protein 5	0.335016	0.288256	0.295754
227565_PM_at	---	---	0.407835	0.401991	0.294268
235944_PM_at	HMCN1	hemicentin 1	0.310801	0.188084	0.293571
205743_PM_at	STAC	SH3 and cysteine rich domain	0.520114	0.403022	0.293279
235504_PM_at	GREM2	gremlin 2, cysteine knot superfamily, homolog (Xenopus laevis)	0.436562	0.303197	0.292332
206085_PM_s_at	CTH	cystathionase (cystathionine gamma-lyase)	0.198153	0.254438	0.292323
200965_PM_s_at	ABLIM1	actin binding LIM protein 1	0.31088	0.316969	0.292158
212816_PM_s_at	CBS	cystathionine-beta-synthase	0.163695	0.16632	0.291988
235489_PM_at	RHOJ	ras homolog gene family, member J	0.234498	0.284704	0.290463
219134_PM_at	ELTD1	EGF, latrophilin and seven transmembrane domain containing 1	0.436569	0.3476	0.288828
229427_PM_at	SEMA5A	sema domain, seven thrombospondin repeats (type 1 and type 1-like), transmembrane domain (TM) and short cytoplasmic domain, (semaphorin) 5A	0.328982	0.259677	0.288146
215856_PM_at	SIGLEC15	sialic acid binding Ig-like lectin 15	0.65366	0.250313	0.286826
205047_PM_s_at	ASNS	asparagine synthetase	0.0944582	0.159749	0.286422
230789_PM_at	ZNF280B	zinc finger protein 280B	0.488515	0.387297	0.285985
204421_PM_s_at	FGF2	fibroblast growth factor 2 (basic)	0.368724	0.271921	0.285859
229221_PM_at	CD44	CD44 molecule (Indian blood group)	0.417344	0.390177	0.285537
226550_PM_at	---	---	0.44895	0.405287	0.282091
201981_PM_at	PAPPA	pregnancy-associated plasma protein A, pappalysin 1	0.858265	0.702728	0.282046
218788_PM_s_at	SMYD3	SET and MYND domain containing 3	0.213123	0.26374	0.281833
227828_PM_s_at	FAM176A	family with sequence similarity 176, member A	0.489041	0.319387	0.280825
239066_PM_at	---	---	0.59546	0.471024	0.28061
200628_PM_s_at	WARS	tryptophanyl-tRNA synthetase	0.25948	0.281192	0.278566
223541_PM_at	HAS3	hyaluronan synthase 3	2.7202	0.662111	0.278266
218326_PM_s_at	LGR4	leucine-rich repeat-containing G protein-coupled receptor 4	0.380864	0.495975	0.278207
211173_PM_at	CCKAR	cholecystokinin A receptor	0.348201	0.30031	0.277655
219501_PM_at	ENOX1	ecto-NOX disulfide-thiol exchanger 1	0.292265	0.335123	0.277037
219749_PM_at	SH2D4A	SH2 domain containing 4A	0.467419	0.341193	0.276509
202997_PM_s_at	LOXL2	lysyl oxidase-like 2	0.384141	0.257572	0.275209
221583_PM_s_at	KCNMA1	potassium large conductance calcium-activated channel, subfamily M, alpha member 1	0.337509	0.214477	0.274555
223599_PM_at	TRIM6	tripartite motif-containing 6	0.341419	0.375757	0.274203
210602_PM_s_at	CDH6	cadherin 6, type 2, K-cadherin (fetal kidney)	0.474638	0.331899	0.274192
231867_PM_at	ODZ2	odz, odd Oz/ten-m homolog 2 (Drosophila)	0.609106	0.523859	0.273912
226789_PM_at	EMB	embigin homolog (mouse)	0.505848	0.434871	0.273847
203355_PM_s_at	PSD3	pleckstrin and Sec7 domain containing 3	0.3208	0.300785	0.273679
232914_PM_s_at	SYTL2	synaptotagmin-like 2	0.941739	0.722585	0.273399
205523_PM_at	HAPLN1	hyaluronan and proteoglycan link protein 1	0.709754	0.511444	0.272841
235666_PM_at	---	---	0.960949	0.317856	0.272222
222108_PM_at	AMIGO2	adhesion molecule with Ig-like domain 2	0.339066	0.0871449	0.271363
222486_PM_s_at	ADAMTS1	ADAM metallopeptidase with thrombospondin type 1 motif, 1	0.532561	0.384605	0.270926
205715_PM_at	BST1	bone marrow stromal cell antigen 1	0.517271	0.357869	0.269816
213069_PM_at	HEG1	HEG homolog 1 (zebrafish)	0.431382	0.45184	0.269741
208394_PM_x_at	ESM1	endothelial cell-specific molecule 1	0.0962121	0.0884813	0.269733
202345_PM_s_at	FABP5	fatty acid binding protein 5 (psoriasis-associated)	1.09676	0.826786	0.269143
209738_PM_x_at	PSG6	pregnancy specific beta-1-glycoprotein 6	0.463391	0.284586	0.268849
213711_PM_at	KRT81	keratin 81	0.396703	0.223199	0.268343
215357_PM_s_at	POLDIP3	polymerase (DNA-directed), delta interacting protein 3	0.925545	0.544883	0.267918
229228_PM_at	CREB5	cAMP responsive element binding protein 5	0.335515	0.2655	0.267625
210511_PM_s_at	INHBA	inhibin, beta A	0.373139	0.190682	0.267617
210990_PM_s_at	LAMA4	laminin, alpha 4	0.419675	0.336723	0.267432
227489_PM_at	SMURF2	SMAD specific E3 ubiquitin protein ligase 2	0.387889	0.221861	0.267387
218613_PM_at	PSD3	pleckstrin and Sec7 domain containing 3	0.347825	0.306273	0.266548
222862_PM_s_at	AK5	adenylate kinase 5	0.365212	0.193447	0.265832
214074_PM_s_at	CTTN	cortactin	0.92003	0.32192	0.265705
205533_PM_s_at	CDH6	cadherin 6, type 2, K-cadherin (fetal kidney)	0.415362	0.279121	0.265448
201995_PM_at	EXT1	exostoses (multiple) 1	0.548996	0.310995	0.264595
205924_PM_at	RAB3B	RAB3B, member RAS oncogene family	1.1366	0.446415	0.264497
202935_PM_s_at	SOX9	SRY (sex determining region Y)-box 9	0.208188	0.17496	0.264418
232297_PM_at	---	---	0.396977	0.383218	0.264202
237206_PM_at	MYOCD	myocardin	0.425696	0.304693	0.263011
202206_PM_at	ARL4C	ADP-ribosylation factor-like 4C	0.086273	0.134924	0.262843
205596_PM_s_at	SMURF2	SMAD specific E3 ubiquitin protein ligase 2	0.410413	0.253792	0.262757
233234_PM_at	KCTD16	potassium channel tetramerisation domain containing 16	0.473244	0.258029	0.262682
1553142_PM_at	C13orf31	chromosome 13 open reading frame 31	0.270565	0.297258	0.262659
41660_PM_at	CELSR1	cadherin, EGF LAG seven-pass G-type receptor 1 (flamingo homolog, Drosophila)	0.316677	0.258146	0.262087
230799_PM_at	LOC100134259	similar to hCG1987718	0.266453	0.241537	0.26189
235085_PM_at	PRAGMIN	homolog of rat pragma of Rnd2	0.830695	0.835273	0.261882
217678_PM_at	SLC7A11	solute carrier family 7, (cationic amino acid transporter, y+ system) member 11	0.0789933	0.191521	0.261457
217999_PM_s_at	PHLDA1	pleckstrin homology-like domain, family A, member 1	0.121249	0.144642	0.261198
235609_PM_at	---	---	1.70673	0.988482	0.260857
203423_PM_at	RBP1	retinol binding protein 1, cellular	0.288044	0.266655	0.259985
235004_PM_at	RBM24	RNA binding motif protein 24	0.418897	0.291393	0.258698
239202_PM_at	---	---	1.03097	0.368428	0.258427
202208_PM_s_at	ARL4C	ADP-ribosylation factor-like 4C	0.113882	0.141926	0.257985
216869_PM_at	PDE1C	phosphodiesterase 1C, calmodulin-dependent 70kDa	0.581157	0.296563	0.256263
241726_PM_at	---	---	0.396311	0.308012	0.256235
227340_PM_s_at	RGMB	RGM domain family, member B	0.366228	0.256455	0.255551
225688_PM_s_at	PHLDB2	pleckstrin homology-like domain, family B, member 2	0.532002	0.455117	0.255394
205234_PM_at	SLC16A4	solute carrier family 16, member 4 (monocarboxylic acid transporter 5)	0.267656	0.377676	0.25508
226136_PM_at	GLIPR1	GLI pathogenesis-related 1	0.805322	0.496858	0.25505
1558105_PM_a_at	---	---	0.509076	0.326958	0.254762
204656_PM_at	SHB	Src homology 2 domain containing adaptor protein B	0.537899	0.326455	0.254069
230820_PM_at	---	---	0.365761	0.232079	0.252818
210735_PM_s_at	CA12	carbonic anhydrase XII	0.254528	0.158342	0.251279
205413_PM_at	MPPED2	metallophosphoesterase domain containing 2	0.437789	0.321824	0.250554
1557181_PM_s_at	C11orf87	chromosome 11 open reading frame 87	1.13789	0.947966	0.250416
219558_PM_at	ATP13A3	ATPase type 13A3	0.683431	0.223039	0.250317
237372_PM_at	---	---	0.437082	0.274397	0.249654
201578_PM_at	PODXL	podocalyxin-like	0.950058	0.220456	0.249429
214985_PM_at	EXT1	exostoses (multiple) 1	0.514727	0.435033	0.247097
207303_PM_at	PDE1C	phosphodiesterase 1C, calmodulin-dependent 70kDa	0.478179	0.320721	0.245464
201287_PM_s_at	SDC1	syndecan 1	0.311677	0.286998	0.245152
212942_PM_s_at	KIAA1199	KIAA1199	0.802364	0.325073	0.245009
225407_PM_at	MBP	myelin basic protein	0.17876	0.206276	0.24468
203354_PM_s_at	PSD3	pleckstrin and Sec7 domain containing 3	0.319413	0.238758	0.244171
1553141_PM_at	C13orf31	chromosome 13 open reading frame 31	0.26599	0.256514	0.243871
228933_PM_at	NHS	Nance-Horan syndrome (congenital cataracts and dental anomalies)	0.505299	0.39774	0.242839
203946_PM_s_at	ARG2	arginase, type II	0.180111	0.167766	0.242805
206814_PM_at	NGF	nerve growth factor (beta polypeptide)	0.276849	0.227942	0.242401
200644_PM_at	MARCKSL1	MARCKS-like 1	0.476644	0.395537	0.242325
229354_PM_at	AHRR	aryl-hydrocarbon receptor repressor	0.623533	0.323357	0.241631
214844_PM_s_at	DOK5	docking protein 5	0.253806	0.123311	0.239604
203441_PM_s_at	CDH2	cadherin 2, type 1, N-cadherin (neuronal)	0.494746	0.26457	0.238516
201431_PM_s_at	DPYSL3	dihydropyrimidinase-like 3	0.441725	0.388946	0.237722
232020_PM_at	SMURF2	SMAD specific E3 ubiquitin protein ligase 2	0.318202	0.194986	0.237196
218380_PM_at	LOC728392 /// NLRP1	hypothetical protein LOC728392 /// NLR family, pyrin domain containing 1	0.251676	0.193449	0.237136
204422_PM_s_at	FGF2	fibroblast growth factor 2 (basic)	0.40242	0.308433	0.236256
201830_PM_s_at	NET1	neuroepithelial cell transforming 1	0.346611	0.217864	0.236137
228367_PM_at	ALPK2	alpha-kinase 2	0.505281	0.400726	0.235717
218729_PM_at	LXN	latexin	0.381815	0.378536	0.235131
204881_PM_s_at	UGCG	UDP-glucose ceramide glucosyltransferase	0.504255	0.423822	0.235039
238452_PM_at	FCRLB	Fc receptor-like B	0.531478	0.268951	0.233931
219179_PM_at	DACT1	dapper, antagonist of beta-catenin, homolog 1 (Xenopus laevis)	0.411808	0.146096	0.232815
201167_PM_x_at	ARHGDIA	Rho GDP dissociation inhibitor (GDI) alpha	1.12941	0.41466	0.230761
201195_PM_s_at	SLC7A5	solute carrier family 7 (cationic amino acid transporter, y+ system), member 5	0.114659	0.104316	0.230047
203228_PM_at	PAFAH1B3	platelet-activating factor acetylhydrolase, isoform Ib, subunit 3 (29kDa)	0.552876	0.470965	0.228641
240509_PM_s_at	GREM2	gremlin 2, cysteine knot superfamily, homolog (Xenopus laevis)	0.518034	0.240034	0.228224
230895_PM_at	HAPLN1	hyaluronan and proteoglycan link protein 1	0.664408	0.362171	0.225486
237939_PM_at	EPHA5	EPH receptor A5	0.295146	0.280314	0.225325
230183_PM_at	EXT1	exostoses (multiple) 1	0.554228	0.23917	0.223702
223618_PM_at	FMN2	formin 2	0.905703	0.30516	0.223475
230204_PM_at	HAPLN1	hyaluronan and proteoglycan link protein 1	0.625789	0.446137	0.221624
225314_PM_at	OCIAD2	OCIA domain containing 2	0.543903	0.344683	0.22141
213931_PM_at	ID2 /// ID2B	inhibitor of DNA binding 2, dominant negative helix-loop-helix protein /// inhibitor of DNA binding 2B, dominant negative helix-loop-helix protein (pseudogene)	1.25504	0.406524	0.220986
212865_PM_s_at	COL14A1	collagen, type XIV, alpha 1	0.34946	0.324212	0.2207
214452_PM_at	BCAT1	branched chain aminotransferase 1, cytosolic	0.289882	0.295955	0.220396
205870_PM_at	BDKRB2	bradykinin receptor B2	0.469135	0.316795	0.219011
213832_PM_at	KCND3	potassium voltage-gated channel, Shal-related subfamily, member 3	0.304295	0.297131	0.218938
201340_PM_s_at	ENC1	ectodermal-neural cortex (with BTB-like domain)	0.751317	0.159866	0.218752
213606_PM_s_at	ARHGDIA	Rho GDP dissociation inhibitor (GDI) alpha	1.02625	0.479532	0.218699
208483_PM_x_at	KRT33A	keratin 33A	0.361174	0.218028	0.218066
205524_PM_s_at	HAPLN1	hyaluronan and proteoglycan link protein 1	0.652334	0.374918	0.217987
235341_PM_at	DNAJC3	DnaJ (Hsp40) homolog, subfamily C, member 3	0.716945	0.354415	0.217627
212314_PM_at	KIAA0746	KIAA0746 protein	0.693444	0.503658	0.217625
221765_PM_at	UGCG	UDP-glucose ceramide glucosyltransferase	0.482566	0.397409	0.21748
207993_PM_s_at	CHP	calcium binding protein P22	1.07292	0.409394	0.217031
239218_PM_at	---	---	0.555481	0.265477	0.216753
208378_PM_x_at	FGF5	fibroblast growth factor 5	1.18411	0.276392	0.216191
213865_PM_at	DCBLD2	discoidin, CUB and LCCL domain containing 2	0.433814	0.211976	0.215345
207604_PM_s_at	SLC4A7	solute carrier family 4, sodium bicarbonate cotransporter, member 7	0.508567	0.224131	0.214785
230147_PM_at	F2RL2	coagulation factor II (thrombin) receptor-like 2	0.366971	0.291056	0.214512
213942_PM_at	MEGF6	multiple EGF-like-domains 6	0.500699	0.313075	0.213914
227566_PM_at	NTM	neurotrimin	0.213746	0.0982395	0.213157
207733_PM_x_at	PSG9	pregnancy specific beta-1-glycoprotein 9	0.42781	0.247956	0.212522
210136_PM_at	MBP	myelin basic protein	0.129507	0.198897	0.212056
AFFX-M27830_5_at	---	---	1.21481	0.334871	0.210296
244091_PM_at	---	---	0.454147	0.279379	0.209398
201309_PM_x_at	C5orf13	chromosome 5 open reading frame 13	1.11084	0.656327	0.208727
239201_PM_at	PFTK2	PFTAIRE protein kinase 2	0.774375	0.298749	0.208358
204051_PM_s_at	SFRP4	secreted frizzled-related protein 4	0.12224	0.344956	0.207957
1554863_PM_s_at	DOK5	docking protein 5	0.232631	0.120441	0.20719
221577_PM_x_at	GDF15 /// LOC100292463	growth differentiation factor 15 /// similar to growth differentiation factor 15	0.0157779	0.0269829	0.206907
226777_PM_at	---	---	0.2676	0.233088	0.206778
210310_PM_s_at	FGF5	fibroblast growth factor 5	1.0382	0.279136	0.206765
209032_PM_s_at	CADM1	cell adhesion molecule 1	0.22746	0.196311	0.206126
200637_PM_s_at	PTPRF	protein tyrosine phosphatase, receptor type, F	0.343787	0.212106	0.202855
200636_PM_s_at	PTPRF	protein tyrosine phosphatase, receptor type, F	0.32258	0.25924	0.201514
219959_PM_at	MOCOS	molybdenum cofactor sulfurase	0.145085	0.192171	0.201264
209582_PM_s_at	CD200	CD200 molecule	0.356389	0.283833	0.200028
204915_PM_s_at	SOX11	SRY (sex determining region Y)-box 11	0.555865	0.42195	0.199637
214390_PM_s_at	BCAT1	branched chain aminotransferase 1, cytosolic	0.26195	0.273757	0.1994
242629_PM_at	---	---	1.02772	0.314684	0.199099
218899_PM_s_at	BAALC	brain and acute leukemia, cytoplasmic	0.208189	0.138605	0.19885
224399_PM_at	PDCD1LG2	programmed cell death 1 ligand 2	0.282689	0.202676	0.198578
1559033_PM_at	LOC255167	hypothetical LOC255167	0.488689	0.300035	0.19811
201631_PM_s_at	IER3	immediate early response 3	0.199299	0.172071	0.196929
210612_PM_s_at	SYNJ2	synaptojanin 2	0.467057	0.224456	0.194693
215543_PM_s_at	LARGE	like-glycosyltransferase	0.201057	0.13976	0.193682
237411_PM_at	ADAMTS6	ADAM metallopeptidase with thrombospondin type 1 motif, 6	0.196046	0.165416	0.192898
1556427_PM_s_at	LRRN4CL	LRRN4 C-terminal like	0.0826598	0.0907486	0.191677
240460_PM_at	---	---	0.361128	0.412893	0.191463
203180_PM_at	ALDH1A3	aldehyde dehydrogenase 1 family, member A3	0.259007	0.157917	0.1911
204653_PM_at	TFAP2A	transcription factor AP-2 alpha (activating enhancer binding protein 2 alpha)	0.430969	0.369414	0.190446
207147_PM_at	DLX2	distal-less homeobox 2	0.689255	0.214346	0.19029
204794_PM_at	DUSP2	dual specificity phosphatase 2	0.498399	0.248553	0.188906
223734_PM_at	C4orf49	chromosome 4 open reading frame 49	0.715712	0.530007	0.187948
223315_PM_at	NTN4	netrin 4	0.537337	0.358025	0.187736
201010_PM_s_at	TXNIP	thioredoxin interacting protein	1.21796	1.41992	0.185664
230831_PM_at	FRMD5	FERM domain containing 5	0.124543	0.11059	0.185242
204614_PM_at	SERPINB2	serpin peptidase inhibitor, clade B (ovalbumin), member 2	0.166161	0.169724	0.184412
206481_PM_s_at	LDB2	LIM domain binding 2	0.216125	0.198522	0.184338
201008_PM_s_at	TXNIP	thioredoxin interacting protein	1.26851	1.33053	0.18308
218885_PM_s_at	GALNT12	UDP-N-acetyl-alpha-D-galactosamine:polypeptide N-acetylgalactosaminyltransferase 12 (GalNAc-T12)	0.170316	0.180694	0.182821
212828_PM_at	SYNJ2	synaptojanin 2	0.435705	0.190738	0.182393
239367_PM_at	BDNF	brain-derived neurotrophic factor	0.527735	0.19619	0.180343
229759_PM_s_at	VEPH1	ventricular zone expressed PH domain homolog 1 (zebrafish)	0.504098	0.276954	0.18012
222020_PM_s_at	NTM	neurotrimin	0.157543	0.0620472	0.17965
237217_PM_at	ADAMTSL1	ADAMTS-like 1	0.392566	0.24607	0.179287
210601_PM_at	CDH6	cadherin 6, type 2, K-cadherin (fetal kidney)	0.319684	0.212131	0.178956
205421_PM_at	SLC22A3	solute carrier family 22 (extraneuronal monoamine transporter), member 3	0.144147	0.15112	0.17882
206382_PM_s_at	BDNF	brain-derived neurotrophic factor	0.586929	0.258753	0.174305
240402_PM_at	KIRREL3	kin of IRRE like 3 (Drosophila)	0.572368	0.358159	0.174067
212311_PM_at	KIAA0746	KIAA0746 protein	0.649963	0.441079	0.173704
204914_PM_s_at	SOX11	SRY (sex determining region Y)-box 11	0.569204	0.426775	0.172872
1555471_PM_a_at	FMN2	formin 2	1.07215	0.294399	0.171634
201565_PM_s_at	ID2	inhibitor of DNA binding 2, dominant negative helix-loop-helix protein	0.914825	0.464094	0.169378
AFFX-HUMISGF3A/M97935_5_at	STAT1	signal transducer and activator of transcription 1, 91kDa	0.435224	0.270312	0.167804
208230_PM_s_at	NRG1	neuregulin 1	0.233887	0.171371	0.167241
205206_PM_at	KAL1	Kallmann syndrome 1 sequence	0.262176	0.331332	0.167057
213790_PM_at	ADAM12	ADAM metallopeptidase domain 12	0.255034	0.214352	0.166728
1557458_PM_s_at	SHB	Src homology 2 domain containing adaptor protein B	0.463484	0.19837	0.166392
239909_PM_at	ADAMTSL1	ADAMTS-like 1	0.357985	0.239662	0.166071
208937_PM_s_at	ID1	inhibitor of DNA binding 1, dominant negative helix-loop-helix protein	4.97458	1.19057	0.163897
206290_PM_s_at	RGS7	regulator of G-protein signaling 7	0.190822	0.161676	0.162895
201422_PM_at	IFI30	interferon, gamma-inducible protein 30	0.359612	0.260883	0.162238
202016_PM_at	MEST	mesoderm specific transcript homolog (mouse)	0.145999	0.264635	0.161871
217979_PM_at	TSPAN13	tetraspanin 13	0.981754	0.537891	0.161241
230493_PM_at	SHISA2	shisa homolog 2 (Xenopus laevis)	0.156086	0.143258	0.160873
212822_PM_at	HEG1	HEG homolog 1 (zebrafish)	0.361883	0.287705	0.160777
201009_PM_s_at	TXNIP	thioredoxin interacting protein	1.30495	1.25376	0.160467
202952_PM_s_at	ADAM12	ADAM metallopeptidase domain 12	0.255523	0.199941	0.160153
1562415_PM_a_at	SPOCD1	SPOC domain containing 1	0.72499	0.488744	0.159954
213816_PM_s_at	MET	met proto-oncogene (hepatocyte growth factor receptor)	0.480391	0.256324	0.159546
227339_PM_at	RGMB	RGM domain family, member B	0.264927	0.187873	0.158481
209765_PM_at	ADAM19	ADAM metallopeptidase domain 19 (meltrin beta)	0.655366	0.278131	0.15775
207876_PM_s_at	FLNC	filamin C, gamma	0.885982	0.374533	0.156757
219578_PM_s_at	CPEB1	cytoplasmic polyadenylation element binding protein 1	0.0883958	0.0940384	0.150381
228033_PM_at	E2F7	E2F transcription factor 7	0.589466	0.418311	0.14941
222908_PM_at	FAM38B	family with sequence similarity 38, member B	1.17003	0.532615	0.147436
235518_PM_at	SLC8A1	solute carrier family 8 (sodium/calcium exchanger), member 1	0.708722	0.279487	0.147294
228750_PM_at	---	---	0.260917	0.217983	0.14708
201430_PM_s_at	DPYSL3	dihydropyrimidinase-like 3	0.349983	0.274954	0.144972
235417_PM_at	SPOCD1	SPOC domain containing 1	0.764632	0.524137	0.144281
222344_PM_at	---	---	1.48311	0.628095	0.143207
219602_PM_s_at	FAM38B	family with sequence similarity 38, member B	1.24006	0.560356	0.140465
1558214_PM_s_at	CTNNA1	catenin (cadherin-associated protein), alpha 1, 102kDa	0.913491	0.346832	0.140125
228964_PM_at	PRDM1	PR domain containing 1, with ZNF domain	0.242405	0.20536	0.13511
226997_PM_at	ADAMTS12	ADAM metallopeptidase with thrombospondin type 1 motif, 12	0.474626	0.339644	0.133766
1560208_PM_at	---	---	0.258189	0.174901	0.13336
203854_PM_at	CFI	complement factor I	0.192125	0.195006	0.131329
217966_PM_s_at	FAM129A	family with sequence similarity 129, member A	0.0415789	0.0537594	0.130726
212444_PM_at	---	---	0.470863	0.216291	0.130444
217967_PM_s_at	FAM129A	family with sequence similarity 129, member A	0.0299673	0.0530462	0.130005
219874_PM_at	SLC12A8	solute carrier family 12 (potassium/chloride transporters), member 8	0.124478	0.195612	0.128772
221019_PM_s_at	COLEC12	collectin sub-family member 12	0.189879	0.161934	0.128739
228237_PM_at	PAPPA2	pappalysin 2	0.142356	0.114939	0.128466
201566_PM_x_at	ID2	inhibitor of DNA binding 2, dominant negative helix-loop-helix protein	0.84137	0.397127	0.128357
216250_PM_s_at	LPXN	leupaxin	0.0992632	0.128903	0.128158
204135_PM_at	FILIP1L	filamin A interacting protein 1-like	0.770802	0.29999	0.127581
203717_PM_at	DPP4	dipeptidyl-peptidase 4	0.22723	0.1342	0.127539
228360_PM_at	LYPD6B	LY6/PLAUR domain containing 6B	0.861357	0.280607	0.123003
223614_PM_at	MMP16	matrix metallopeptidase 16 (membrane-inserted)	0.215113	0.256651	0.12269
206392_PM_s_at	RARRES1	retinoic acid receptor responder (tazarotene induced) 1	0.177964	0.146231	0.121063
221872_PM_at	RARRES1	retinoic acid receptor responder (tazarotene induced) 1	0.202104	0.130315	0.117938
212940_PM_at	COL6A1	collagen, type VI, alpha 1	0.695173	0.244146	0.116862
1554966_PM_a_at	FILIP1L	filamin A interacting protein 1-like	0.862561	0.21566	0.116151
226869_PM_at	MEGF6	multiple EGF-like-domains 6	0.670098	0.199949	0.114602
236044_PM_at	PPAPDC1A	phosphatidic acid phosphatase type 2 domain containing 1A	0.297221	0.127434	0.114351
244623_PM_at	KCNQ5	potassium voltage-gated channel, KQT-like subfamily, member 5	0.218756	0.154491	0.113005
227314_PM_at	ITGA2	integrin, alpha 2 (CD49B, alpha 2 subunit of VLA-2 receptor)	0.151826	0.124696	0.110728
200635_PM_s_at	PTPRF	protein tyrosine phosphatase, receptor type, F	0.337545	0.158021	0.108656
204471_PM_at	GAP43	growth associated protein 43	0.151332	0.130414	0.107022
228937_PM_at	C13orf31	chromosome 13 open reading frame 31	0.124992	0.108647	0.102393
210026_PM_s_at	CARD10	caspase recruitment domain family, member 10	0.324818	0.174762	0.101843
204913_PM_s_at	SOX11	SRY (sex determining region Y)-box 11	0.524208	0.215773	0.101076
210587_PM_at	INHBE	inhibin, beta E	0.0776163	0.0845576	0.0998946
203399_PM_x_at	PSG3	pregnancy specific beta-1-glycoprotein 3	0.407082	0.151322	0.0996195
220794_PM_at	GREM2	gremlin 2, cysteine knot superfamily, homolog (Xenopus laevis)	0.503524	0.1389	0.0990469
1554685_PM_a_at	KIAA1199	KIAA1199	0.515978	0.120684	0.0959301
209583_PM_s_at	CD200	CD200 molecule	0.275924	0.230729	0.0930043
229585_PM_at	ADAMTSL1	ADAMTS-like 1	0.2849	0.182132	0.0922253
205832_PM_at	CPA4	carboxypeptidase A4	0.0949506	0.16784	0.0873799
209031_PM_at	CADM1	cell adhesion molecule 1	0.105532	0.0740698	0.0822855
209030_PM_s_at	CADM1	cell adhesion molecule 1	0.171424	0.109086	0.0813223
211741_PM_x_at	PSG3	pregnancy specific beta-1-glycoprotein 3	0.373525	0.157434	0.0758566
201042_PM_at	TGM2	transglutaminase 2 (C polypeptide, protein-glutamine-gamma-glutamyltransferase)	0.593086	0.203204	0.0743146
213332_PM_at	PAPPA2	pappalysin 2	0.0728931	0.0747652	0.0714591
203108_PM_at	GPRC5A	G protein-coupled receptor, family C, group 5, member A	0.382341	0.184452	0.0713351
206118_PM_at	STAT4	signal transducer and activator of transcription 4	0.190207	0.235567	0.0698563
206237_PM_s_at	NRG1	neuregulin 1	0.107946	0.0674842	0.0688469
205532_PM_s_at	CDH6	cadherin 6, type 2, K-cadherin (fetal kidney)	0.309805	0.169055	0.064318
203666_PM_at	CXCL12	chemokine (C-X-C motif) ligand 12 (stromal cell-derived factor 1)	0.28808	0.143129	0.0617215
207510_PM_at	BDKRB1	bradykinin receptor B1	0.152615	0.0631472	0.0604138
209594_PM_x_at	PSG9	pregnancy specific beta-1-glycoprotein 9	0.38302	0.146501	0.0568778
233533_PM_at	KRTAP1-5	keratin associated protein 1-5	0.750624	0.0964893	0.0564581
221211_PM_s_at	C21orf7	chromosome 21 open reading frame 7	0.0582001	0.0508181	0.0559112
204830_PM_x_at	PSG5	pregnancy specific beta-1-glycoprotein 5	0.404617	0.132416	0.0550034
221111_PM_at	IL26	interleukin 26	0.0582178	0.0623838	0.0548955
212909_PM_at	LYPD1	LY6/PLAUR domain containing 1	0.080667	0.0607372	0.0546335
209687_PM_at	CXCL12	chemokine (C-X-C motif) ligand 12 (stromal cell-derived factor 1)	0.306044	0.167228	0.053633
218332_PM_at	BEX1	brain expressed, X-linked 1	0.867174	0.188339	0.0535737
234880_PM_x_at	KRTAP1-3	keratin associated protein 1-3	0.526033	0.0738015	0.052382
214803_PM_at	---	---	0.386139	0.197163	0.0489869
206343_PM_s_at	NRG1	neuregulin 1	0.11874	0.0588055	0.0457046
1563933_PM_a_at	PLD5	phospholipase D family, member 5	0.781829	0.229249	0.0414088
205475_PM_at	SCRG1	stimulator of chondrogenesis 1	0.0921029	0.095281	0.0387415
218468_PM_s_at	GREM1	gremlin 1, cysteine knot superfamily, homolog (Xenopus laevis)	0.75711	0.118636	0.0384545
218469_PM_at	GREM1	gremlin 1, cysteine knot superfamily, homolog (Xenopus laevis)	0.624692	0.109295	0.0348228
219935_PM_at	ADAMTS5	ADAM metallopeptidase with thrombospondin type 1 motif, 5	0.212209	0.123279	0.0324723
210002_PM_at	GATA6	GATA binding protein 6	0.164681	0.0482691	0.0306458
235368_PM_at	ADAMTS5	ADAM metallopeptidase with thrombospondin type 1 motif, 5	0.163631	0.0646358	0.0304948
201650_PM_at	KRT19	keratin 19	0.16003	0.0500401	0.0304294
229357_PM_at	ADAMTS5	ADAM metallopeptidase with thrombospondin type 1 motif, 5	0.207039	0.107265	0.0288259
228335_PM_at	CLDN11	claudin 11	0.0448263	0.0211341	0.0258932
201596_PM_x_at	KRT18	keratin 18	0.162373	0.0722775	0.0257434
206969_PM_at	KRT34	keratin 34	0.099185	0.0234611	0.0250921
205207_PM_at	IL6	interleukin 6 (interferon, beta 2)	0.0441511	0.0320379	0.0249469
1555673_PM_at	hCG_1749898	KRTAP2-4 protein	0.23892	0.0306051	0.0183134
215704_PM_at	FLG	filaggrin	0.26685	0.0846998	0.015584
220976_PM_s_at	KRTAP1-1	keratin associated protein 1-1	0.213169	0.0158592	0.00791508

## Sheet: 5days Up (1.5fold)
Probe set	Symbol	Gene title	Fold change day 2/day0	Fold change day 5/day0	Fold change day 10/day0
214456_PM_x_at	SAA1 /// SAA2	serum amyloid A1 /// serum amyloid A2	128.161	256.896	256.54
225987_PM_at	STEAP4	STEAP family member 4	8.99044	190.826	191.582
207092_PM_at	LEP	leptin	51.4237	98.4663	237.88
228854_PM_at	---	---	62.2989	87.8864	119.352
205907_PM_s_at	OMD	osteomodulin	23.9982	86.0106	196.983
209170_PM_s_at	GPM6B	glycoprotein M6B	25.4552	84.4994	230.634
209167_PM_at	GPM6B	glycoprotein M6B	25.672	82.7419	207.577
213948_PM_x_at		cell adhesion molecule 3	8.63809	74.4679	211.557
220356_PM_at	CORIN	corin, serine peptidase	21.9643	67.7656	153.337
208607_PM_s_at	SAA1 /// SAA2	serum amyloid A1 /// serum amyloid A2	26.6069	65.2981	63.1168
203698_PM_s_at	FRZB	frizzled-related protein	34.6097	59.1805	99.9469
224856_PM_at	FKBP5	FK506 binding protein 5	42.3914	58.0595	64.3334
206100_PM_at	CPM	carboxypeptidase M	70.8026	53.9792	54.7112
203697_PM_at	FRZB	frizzled-related protein	35.5932	53.6112	87.9592
239260_PM_at	CORIN	corin, serine peptidase	19.854	45.5396	88.6097
205908_PM_s_at	OMD	osteomodulin	9.10083	43.134	108.539
212741_PM_at	MAOA	monoamine oxidase A	20.0301	42.5569	44.5282
239261_PM_s_at	CORIN	corin, serine peptidase	19.1464	42.3392	89.3331
213068_PM_at	DPT	dermatopontin	2.28024	38.5549	218.524
218723_PM_s_at	C13orf15	chromosome 13 open reading frame 15	40.2485	38.2226	89.4049
224840_PM_at	FKBP5	FK506 binding protein 5	27.3467	36.5369	42.5796
211355_PM_x_at	LEPR	leptin receptor	24.7336	35.6415	49.4829
213075_PM_at	OLFML2A	olfactomedin-like 2A	12.6423	34.2259	83.0141
219478_PM_at	WFDC1	WAP four-disulfide core domain 1	18.0099	33.1132	16.089
211356_PM_x_at	LEPR	leptin receptor	23.7915	32.7659	45.8532
235019_PM_at	CPM	carboxypeptidase M	44.9431	32.0729	32.1638
227762_PM_at	---	---	22.0101	30.2196	40.8823
202410_PM_x_at	IGF2 /// INS-IGF2	insulin-like growth factor 2 (somatomedin A) /// INS-IGF2 readthrough transcript	19.2204	29.5284	38.125
202409_PM_at	IGF2 /// INS-IGF2	insulin-like growth factor 2 (somatomedin A) /// INS-IGF2 readthrough transcript	20.783	29.0594	36.2031
205382_PM_s_at	CFD	complement factor D (adipsin)	7.27466	27.8201	65.8428
235751_PM_s_at	VMO1	vitelline membrane outer layer 1 homolog (chicken)	8.45568	26.4416	17.2224
204388_PM_s_at	MAOA	monoamine oxidase A	7.9294	26.2402	25.1699
211354_PM_s_at	LEPR	leptin receptor	16.9594	25.94	30.8
235182_PM_at	ISM1	isthmin 1 homolog (zebrafish)	5.45647	25.5127	53.6799
205108_PM_s_at	APOB	apolipoprotein B (including Ag(x) antigen)	12.5155	25.1643	32.3089
205883_PM_at	ZBTB16	zinc finger and BTB domain containing 16	18.4301	25.0996	35.8817
235706_PM_at	CPM	carboxypeptidase M	37.91	23.546	25.2914
209168_PM_at	GPM6B	glycoprotein M6B	5.45106	23.3687	68.8764
227006_PM_at	PPP1R14A	protein phosphatase 1, regulatory (inhibitor) subunit 14A	26.5897	22.3913	15.0412
229302_PM_at	TMEM178	transmembrane protein 178	3.25794	22.2971	43.2581
209612_PM_s_at	ADH1B	alcohol dehydrogenase 1B (class I), beta polypeptide	9.87884	21.1382	43.7522
210881_PM_s_at	IGF2 /// INS-IGF2	insulin-like growth factor 2 (somatomedin A) /// INS-IGF2 readthrough transcript	14.4795	21.0545	29.114
204470_PM_at	CXCL1	chemokine (C-X-C motif) ligand 1 (melanoma growth stimulating activity, alpha)	2.26366	20.6557	16.4833
207977_PM_s_at	DPT	dermatopontin	1.65017	20.4647	118.377
203021_PM_at	SLPI	secretory leukocyte peptidase inhibitor	5.76042	20.0062	36.2252
222253_PM_s_at	POM121L9P	POM121 membrane glycoprotein-like 9 (rat) pseudogene	9.56285	19.8577	21.2463
206243_PM_at	TIMP4	TIMP metallopeptidase inhibitor 4	7.81033	19.8548	38.0272
1556185_PM_a_at	---	---	1.3602	18.339	18.5379
217767_PM_at	C3	complement component 3	3.38622	17.9575	25.3866
206407_PM_s_at	CCL13	chemokine (C-C motif) ligand 13	1.08624	17.8242	23.8315
209613_PM_s_at	ADH1B	alcohol dehydrogenase 1B (class I), beta polypeptide	7.97544	17.6958	46.4164
224646_PM_x_at	H19	H19, imprinted maternally expressed transcript (non-protein coding)	6.8482	17.6265	16.0917
1556997_PM_a_at	---	---	8.42366	17.1885	19.6006
206176_PM_at	BMP6	bone morphogenetic protein 6	49.2693	17.1685	13.0746
204223_PM_at	PRELP	proline/arginine-rich end leucine-rich repeat protein	8.4428	16.1781	60.4161
219087_PM_at	ASPN	asporin	0.745852	15.7483	92.8812
202724_PM_s_at	FOXO1	forkhead box O1	8.59853	15.72	26.6399
203184_PM_at	FBN2	fibrillin 2	8.25761	15.7013	12.9705
224397_PM_s_at	TMTC1	transmembrane and tetratricopeptide repeat containing 1	10.2067	15.5949	16.1275
228224_PM_at	PRELP	proline/arginine-rich end leucine-rich repeat protein	7.30688	15.0141	59.4369
205226_PM_at	PDGFRL	platelet-derived growth factor receptor-like	2.58319	14.5828	26.1114
219230_PM_at	TMEM100	transmembrane protein 100	2.01401	13.9849	20.1469
206002_PM_at	GPR64	G protein-coupled receptor 64	5.029	13.9437	13.6291
209894_PM_at	LEPR	leptin receptor	10.1798	13.6071	15.172
226322_PM_at	TMTC1	transmembrane and tetratricopeptide repeat containing 1	9.28443	13.6034	19.0762
220786_PM_s_at	SLC38A4	solute carrier family 38, member 4	9.73175	13.4772	24.8692
230463_PM_at	---	---	3.85402	12.577	20.5927
205609_PM_at	ANGPT1	angiopoietin 1	7.18119	12.4937	15.872
213348_PM_at	CDKN1C	cyclin-dependent kinase inhibitor 1C (p57, Kip2)	10.3386	12.4812	11.9334
226931_PM_at	TMTC1	transmembrane and tetratricopeptide repeat containing 1	10.7088	12.3537	19.9925
202723_PM_s_at	FOXO1	forkhead box O1	7.79704	12.2213	20.5291
219304_PM_s_at	PDGFD	platelet derived growth factor D	11.5697	11.9739	18.6068
234987_PM_at	---	---	5.40617	11.9577	24.0125
227480_PM_at	SUSD2	sushi domain containing 2	4.39756	11.9513	14.6249
209301_PM_at	CA2	carbonic anhydrase II	1.64346	11.9479	4.76403
235529_PM_x_at	---	---	4.52582	11.771	20.3524
204502_PM_at	SAMHD1	SAM domain and HD domain 1	5.36448	11.7346	19.7824
235964_PM_x_at	---	---	4.76779	11.6795	19.1868
205713_PM_s_at	COMP	cartilage oligomeric matrix protein	5.63248	11.5928	19.3438
205608_PM_s_at	ANGPT1	angiopoietin 1	7.73833	11.4653	15.6579
207761_PM_s_at	METTL7A	methyltransferase like 7A	5.66286	11.2851	17.8079
204867_PM_at	GCHFR	GTP cyclohydrolase I feedback regulator	14.2157	11.135	21.2267
209436_PM_at	SPON1	spondin 1, extracellular matrix protein	1.77541	10.8534	25.8559
206496_PM_at	FMO3	flavin containing monooxygenase 3	5.66577	10.7527	24.3919
228176_PM_at	S1PR3	sphingosine-1-phosphate receptor 3	3.62861	10.6023	10.7297
229271_PM_x_at	COL11A1	collagen, type XI, alpha 1	6.63844	10.2524	14.009
227307_PM_at	TSPAN18	Tetraspanin 18	5.53623	10.2008	13.642
209169_PM_at	GPM6B	glycoprotein M6B	2.19717	10.1013	31.2783
40665_PM_at	FMO3	flavin containing monooxygenase 3	5.38511	10.0837	23.8852
1559883_PM_s_at	SAMHD1	SAM domain and HD domain 1	4.59543	9.93137	21.1611
204389_PM_at	MAOA	monoamine oxidase A	3.72974	9.74091	10.2245
220180_PM_at	CCDC68	coiled-coil domain containing 68	6.70706	9.58008	28.7628
236936_PM_at	---	---	4.42426	9.3966	12.851
236361_PM_at	GALNTL2	UDP-N-acetyl-alpha-D-galactosamine:polypeptide N-acetylgalactosaminyltransferase-like 2	7.25865	9.21771	7.70032
203126_PM_at	IMPA2	inositol(myo)-1(or 4)-monophosphatase 2	10.3115	9.20179	5.7554
201427_PM_s_at	SEPP1	selenoprotein P, plasma, 1	5.59611	8.94683	21.9453
206819_PM_at	POM121L9P	POM121 membrane glycoprotein-like 9 (rat) pseudogene	3.99409	8.93906	9.83847
226955_PM_at	AFAP1L1	actin filament associated protein 1-like 1	2.45907	8.89078	23.0124
208510_PM_s_at	PPARG	peroxisome proliferator-activated receptor gamma	4.37958	8.80262	12.4741
203921_PM_at	CHST2	carbohydrate (N-acetylglucosamine-6-O) sulfotransferase 2	6.52244	8.80048	8.89926
211597_PM_s_at	HOPX	HOP homeobox	5.40379	8.75925	28.9875
226047_PM_at	MRVI1	murine retrovirus integration site 1 homolog	8.58595	8.60565	7.29045
231929_PM_at	IKZF2	IKAROS family zinc finger 2 (Helios)	12.7006	8.49354	3.65002
205582_PM_s_at	GGT5	gamma-glutamyltransferase 5	4.57263	8.47813	13.4432
204560_PM_at	FKBP5	FK506 binding protein 5	7.6883	8.21049	8.73129
209189_PM_at	FOS	FBJ murine osteosarcoma viral oncogene homolog	5.46314	8.168	9.32638
228057_PM_at	DDIT4L	DNA-damage-inducible transcript 4-like	1.20296	8.1646	5.12034
205083_PM_at	AOX1	aldehyde oxidase 1	6.26052	8.04718	10.0713
205082_PM_s_at	AOX1	aldehyde oxidase 1	5.22182	8.03952	10.2432
215813_PM_s_at	PTGS1	prostaglandin-endoperoxide synthase 1 (prostaglandin G/H synthase and cyclooxygenase)	2.4134	8.03323	22.2866
202388_PM_at	RGS2	regulator of G-protein signaling 2, 24kDa	2.43699	7.98523	5.95092
204457_PM_s_at	GAS1	growth arrest-specific 1	4.96262	7.88393	6.84376
230214_PM_at	MRVI1	murine retrovirus integration site 1 homolog	9.52698	7.79431	6.12862
202035_PM_s_at	SFRP1	secreted frizzled-related protein 1	4.66787	7.75737	13.3697
202037_PM_s_at	SFRP1	secreted frizzled-related protein 1	5.4432	7.71546	11.1211
206631_PM_at	PTGER2	prostaglandin E receptor 2 (subtype EP2), 53kDa	6.97127	7.69987	11.624
228501_PM_at	GALNTL2	UDP-N-acetyl-alpha-D-galactosamine:polypeptide N-acetylgalactosaminyltransferase-like 2	5.58901	7.6058	6.10696
213994_PM_s_at	SPON1	spondin 1, extracellular matrix protein	1.12157	7.43661	13.6934
205128_PM_x_at	PTGS1	prostaglandin-endoperoxide synthase 1 (prostaglandin G/H synthase and cyclooxygenase)	2.47234	7.359	21.0808
201787_PM_at	FBLN1	fibulin 1	3.10102	7.34102	12.6771
227758_PM_at	RERG	RAS-like, estrogen-regulated, growth inhibitor	1.79631	7.31172	19.2898
221796_PM_at	NTRK2	neurotrophic tyrosine kinase, receptor, type 2	1.27292	7.24466	43.0666
208470_PM_s_at	HP /// HPR	haptoglobin /// haptoglobin-related protein	1.32576	7.22094	29.9221
232736_PM_s_at	POM121L8P /// POM121L9P	POM121 membrane glycoprotein-like 8 (rat) pseudogene /// POM121 membrane glycoprotein-like 9 (rat) pseudogene	3.51824	7.20735	7.98325
229623_PM_at	FLJ12993	Hypothetical LOC441027	3.41334	7.04553	7.41231
1556114_PM_a_at	DKFZp451A211	DKFZp451A211 protein	7.08484	7.01102	7.1698
211006_PM_s_at	KCNB1	potassium voltage-gated channel, Shab-related subfamily, member 1	18.5981	6.9618	6.49548
209343_PM_at	EFHD1	EF-hand domain family, member D1	9.11079	6.95283	11.7941
228819_PM_at	TSPAN18	tetraspanin 18	4.64486	6.89811	8.77917
207255_PM_at	LEPR	leptin receptor	5.03415	6.88039	6.63564
214587_PM_at	COL8A1	collagen, type VIII, alpha 1	5.40794	6.83035	6.91521
238919_PM_at	---	---	9.01501	6.74384	11.2972
203435_PM_s_at	MME	membrane metallo-endopeptidase	1.77863	6.63048	10.8914
219398_PM_at	CIDEC	cell death-inducing DFFA-like effector c	1.97559	6.59153	11.982
204897_PM_at	PTGER4	prostaglandin E receptor 4 (subtype EP4)	4.0735	6.58457	10.8345
229011_PM_at	---	---	3.74257	6.53607	11.9727
223467_PM_at	RASD1	RAS, dexamethasone-induced 1	2.38266	6.51019	4.07516
213247_PM_at	SVEP1	sushi, von Willebrand factor type A, EGF and pentraxin domain containing 1	4.26824	6.47522	9.4611
208335_PM_s_at	DARC	Duffy blood group, chemokine receptor	1.24665	6.47493	13.8302
201525_PM_at	APOD	apolipoprotein D	1.70281	6.4255	69.9264
238178_PM_at	---	---	2.89887	6.39227	3.71195
209074_PM_s_at	FAM107A	family with sequence similarity 107, member A	2.39936	6.34204	9.23693
212886_PM_at	CCDC69	coiled-coil domain containing 69	2.86866	6.27079	4.91997
213895_PM_at	EMP1	epithelial membrane protein 1	3.46495	6.22057	13.5665
210729_PM_at	NPY2R	neuropeptide Y receptor Y2	1.9757	6.20362	15.3494
230958_PM_s_at	---	---	4.71361	6.08721	6.76674
212558_PM_at	SPRY1	sprouty homolog 1, antagonist of FGF signaling (Drosophila)	5.21329	6.03485	17.6434
228653_PM_at	SAMD5	sterile alpha motif domain containing 5	3.52273	6.02223	8.09688
225177_PM_at	RAB11FIP1	RAB11 family interacting protein 1 (class I)	5.65026	6.00676	4.64495
223402_PM_at	DUSP23	dual specificity phosphatase 23	5.04222	6.00398	5.85413
231798_PM_at	NOG	noggin	4.29877	5.98045	5.64574
244745_PM_at	RERG	RAS-like, estrogen-regulated, growth inhibitor	1.84772	5.94462	15.6217
213071_PM_at	DPT	dermatopontin	1.18746	5.92796	52.4038
219737_PM_s_at	PCDH9	protocadherin 9	6.68662	5.86493	10.0628
244419_PM_at	FRZB	Frizzled-related protein	2.99968	5.80754	11.1847
239638_PM_at	---	---	3.52065	5.78829	11.2223
37892_PM_at	COL11A1	collagen, type XI, alpha 1	3.81845	5.76599	7.05629
204320_PM_at	COL11A1	collagen, type XI, alpha 1	3.69248	5.75409	7.08813
207177_PM_at	PTGFR	prostaglandin F receptor (FP)	0.557919	5.73434	16.4879
212239_PM_at	PIK3R1	phosphoinositide-3-kinase, regulatory subunit 1 (alpha)	2.81929	5.71558	6.10355
202376_PM_at	SERPINA3	serpin peptidase inhibitor, clade A (alpha-1 antiproteinase, antitrypsin), member 3	0.976242	5.71465	13.9252
202859_PM_x_at	IL8	interleukin 8	3.82657	5.69332	13.9063
239273_PM_s_at	MMP28	matrix metallopeptidase 28	1.75915	5.67159	4.07928
212240_PM_s_at	PIK3R1	phosphoinositide-3-kinase, regulatory subunit 1 (alpha)	2.75971	5.6161	6.49141
205500_PM_at	C5	complement component 5	2.53328	5.61386	3.50669
203434_PM_s_at	MME	membrane metallo-endopeptidase	1.64322	5.60205	8.19456
221245_PM_s_at	FZD5	frizzled homolog 5 (Drosophila)	7.89041	5.54907	3.21391
242002_PM_at	NKAIN2	Na+/K+ transporting ATPase interacting 2	2.4255	5.50877	13.9825
229518_PM_at	FAM46B	family with sequence similarity 46, member B	4.09436	5.50088	4.57594
206315_PM_at	CRLF1	cytokine receptor-like factor 1	2.04819	5.49134	11.543
236300_PM_at	---	---	3.0536	5.43962	3.79164
226806_PM_s_at	NFIA	nuclear factor I/A	3.6773	5.42136	6.51745
228325_PM_at	KIAA0146	KIAA0146	4.2507	5.39498	3.02218
203000_PM_at	STMN2	stathmin-like 2	1.17435	5.39106	20.4935
228910_PM_at	---	---	2.8404	5.34994	7.53898
215119_PM_at	MYO16	myosin XVI	2.9461	5.34154	10.1911
232458_PM_at	COL3A1	Collagen, type III, alpha 1	1.4718	5.31174	5.88104
238463_PM_at	---	---	2.31086	5.31072	7.18795
202861_PM_at	PER1	period homolog 1 (Drosophila)	4.55866	5.22466	5.63765
231773_PM_at	ANGPTL1	angiopoietin-like 1	1.54764	5.19545	4.19015
227862_PM_at	TRNP1	TMF1-regulated nuclear protein 1	3.73367	5.16856	5.6875
204491_PM_at	PDE4D	phosphodiesterase 4D, cAMP-specific (phosphodiesterase E3 dunce homolog, Drosophila)	1.68207	5.14539	3.19751
213006_PM_at	CEBPD	CCAAT/enhancer binding protein (C/EBP), delta	4.05173	5.12365	2.83647
216894_PM_x_at	CDKN1C	cyclin-dependent kinase inhibitor 1C (p57, Kip2)	4.79098	5.11132	4.64181
209505_PM_at	NR2F1	Nuclear receptor subfamily 2, group F, member 1	4.1731	5.10021	8.79361
242605_PM_at	---	---	4.07428	5.09597	3.16552
224901_PM_at	SCD5	stearoyl-CoA desaturase 5	3.83694	5.09107	5.51294
202995_PM_s_at	FBLN1	fibulin 1	2.51368	5.0761	8.44197
217546_PM_at	MT1M	metallothionein 1M	2.53975	5.05053	4.03118
226055_PM_at	ARRDC2	arrestin domain containing 2	4.32106	5.04012	11.9947
204718_PM_at	EPHB6	EPH receptor B6	1.47457	4.96793	10.9366
1555097_PM_a_at	PTGFR	prostaglandin F receptor (FP)	0.796713	4.96149	15.1779
231262_PM_at	---	---	2.84175	4.9607	5.92429
219790_PM_s_at	NPR3	natriuretic peptide receptor C/guanylate cyclase C (atrionatriuretic peptide receptor C)	4.96001	4.9517	3.61921
227948_PM_at	FGD4	FYVE, RhoGEF and PH domain containing 4	12.4559	4.94188	5.39459
204040_PM_at	RNF144A	ring finger protein 144A	0.998448	4.91595	7.24532
219789_PM_at	NPR3	natriuretic peptide receptor C/guanylate cyclase C (atrionatriuretic peptide receptor C)	5.0126	4.84686	3.42308
208998_PM_at	UCP2	uncoupling protein 2 (mitochondrial, proton carrier)	2.47646	4.84175	2.81578
204187_PM_at	GMPR	guanosine monophosphate reductase	3.4242	4.82534	5.91979
241765_PM_at	CPM	carboxypeptidase M	7.34594	4.82392	5.19087
36829_PM_at	PER1	period homolog 1 (Drosophila)	3.97606	4.82305	4.7747
222860_PM_s_at	PDGFD	platelet derived growth factor D	5.91954	4.80506	8.58236
202994_PM_s_at	FBLN1	fibulin 1	2.3084	4.80203	7.50571
202286_PM_s_at	TACSTD2	tumor-associated calcium signal transducer 2	1.22584	4.80079	14.6519
206091_PM_at	MATN3	matrilin 3	3.04032	4.78167	5.26191
205818_PM_at	DBC1	deleted in bladder cancer 1	1.76798	4.75287	5.946
1553102_PM_a_at	CCDC69	coiled-coil domain containing 69	2.27989	4.75268	3.90329
211677_PM_x_at	CADM3	cell adhesion molecule 3	1.57357	4.74625	13.7899
204035_PM_at	SCG2	secretogranin II (chromogranin C)	0.619979	4.74586	12.5225
219738_PM_s_at	PCDH9	protocadherin 9	3.40822	4.73877	7.81156
204720_PM_s_at	DNAJC6	DnaJ (Hsp40) homolog, subfamily C, member 6	5.11192	4.73805	4.04544
203453_PM_at	SCNN1A	sodium channel, nonvoltage-gated 1 alpha	2.50637	4.7309	3.22519
213413_PM_at	STON1	stonin 1	3.45663	4.7265	6.98175
207001_PM_x_at	TSC22D3	TSC22 domain family, member 3	2.63286	4.70512	9.41224
222722_PM_at	OGN	osteoglycin	1.24892	4.70142	18.3902
214022_PM_s_at	IFITM1	interferon induced transmembrane protein 1 (9-27)	1.43734	4.66677	7.61411
219534_PM_x_at	CDKN1C	cyclin-dependent kinase inhibitor 1C (p57, Kip2)	4.57251	4.66555	4.27096
233109_PM_at	COL12A1	Collagen, type XII, alpha 1	2.35478	4.64964	6.10958
212249_PM_at	PIK3R1	phosphoinositide-3-kinase, regulatory subunit 1 (alpha)	2.15201	4.63877	4.48495
240869_PM_at	---	---	6.85714	4.63664	4.52825
206766_PM_at	ITGA10	integrin, alpha 10	5.19789	4.60826	8.62596
241450_PM_at	RSPO1	R-spondin homolog (Xenopus laevis)	2.37726	4.57822	11.1265
214433_PM_s_at	SELENBP1	selenium binding protein 1	2.2747	4.56197	4.23534
232805_PM_at	---	---	2.47255	4.55087	10.5163
205782_PM_at	FGF7	fibroblast growth factor 7 (keratinocyte growth factor)	3.38225	4.53798	5.37522
224339_PM_s_at	ANGPTL1	angiopoietin-like 1	1.49207	4.53194	3.49935
219054_PM_at	C5orf23	chromosome 5 open reading frame 23	4.34574	4.52809	3.78964
227032_PM_at	PLXNA2	plexin A2	5.92167	4.51623	6.00814
1564796_PM_at	EMP1	epithelial membrane protein 1	2.45905	4.51465	7.07018
214581_PM_x_at	TNFRSF21	tumor necrosis factor receptor superfamily, member 21	2.84985	4.51459	4.37387
235122_PM_at	HIVEP3	human immunodeficiency virus type I enhancer binding protein 3	4.39845	4.49104	2.48553
202761_PM_s_at	SYNE2	spectrin repeat containing, nuclear envelope 2	4.68128	4.45121	4.01793
201044_PM_x_at	DUSP1	dual specificity phosphatase 1	6.34065	4.39853	5.19933
202036_PM_s_at	SFRP1	secreted frizzled-related protein 1	4.81896	4.37925	4.53946
243879_PM_at	---	---	1.49915	4.3767	9.04748
206756_PM_at	CHST7	carbohydrate (N-acetylglucosamine 6-O) sulfotransferase 7	3.0231	4.37342	3.42109
226731_PM_at	PELO	Pelota homolog (Drosophila)	4.02261	4.3644	3.66209
219681_PM_s_at	RAB11FIP1	RAB11 family interacting protein 1 (class I)	5.33466	4.35351	2.84985
227899_PM_at	VIT	vitrin	1.6773	4.35244	14.7959
225516_PM_at	SLC7A2	solute carrier family 7 (cationic amino acid transporter, y+ system), member 2	1.36749	4.32738	10.0077
231031_PM_at	KGFLP2	keratinocyte growth factor-like protein 2	2.81496	4.30478	4.73928
204154_PM_at	CDO1	cysteine dioxygenase, type I	1.11603	4.25183	6.99607
223468_PM_s_at	RGMA	RGM domain family, member A	1.84742	4.23981	3.75278
241560_PM_at	---	---	0.818057	4.23399	3.39644
224997_PM_x_at	H19	H19, imprinted maternally expressed transcript (non-protein coding)	1.59153	4.22842	3.26059
224976_PM_at	NFIA	nuclear factor I/A	3.44227	4.22154	3.519
226814_PM_at	ADAMTS9	ADAM metallopeptidase with thrombospondin type 1 motif, 9	3.63097	4.20703	1.89901
228962_PM_at	PDE4D	phosphodiesterase 4D, cAMP-specific (phosphodiesterase E3 dunce homolog, Drosophila)	1.61893	4.20003	2.30944
224975_PM_at	NFIA	nuclear factor I/A	3.23919	4.19343	4.41411
224396_PM_s_at	ASPN	asporin	0.783774	4.18816	45.0996
224550_PM_s_at	MRVI1	murine retrovirus integration site 1 homolog	6.25629	4.15547	3.53687
228461_PM_at	SH3RF3	SH3 domain containing ring finger 3	2.80544	4.15365	4.54165
239272_PM_at	MMP28	matrix metallopeptidase 28	2.12795	4.1367	3.81469
204456_PM_s_at	GAS1	growth arrest-specific 1	1.98786	4.12948	2.66038
220639_PM_at	TM4SF20	transmembrane 4 L six family member 20	1.90113	4.05432	1.53998
219443_PM_at	TASP1	taspase, threonine aspartase, 1	2.01014	4.03916	2.3557
222513_PM_s_at	SORBS1	sorbin and SH3 domain containing 1	4.44146	4.03057	4.62
203407_PM_at	PPL	periplakin	1.1312	4.0219	11.5725
202718_PM_at	IGFBP2	insulin-like growth factor binding protein 2, 36kDa	3.73786	4.00628	8.17064
211317_PM_s_at	CFLAR	CASP8 and FADD-like apoptosis regulator	3.41257	3.98576	3.85447
215306_PM_at	---	---	2.82666	3.97545	7.61181
202291_PM_s_at	MGP	matrix Gla protein	0.945016	3.96824	21.7151
231015_PM_at	KLF15	Kruppel-like factor 15	2.65309	3.96681	8.02574
204041_PM_at	MAOB	monoamine oxidase B	2.08405	3.96371	4.54974
242657_PM_at	---	---	2.47077	3.96137	3.634
204439_PM_at	IFI44L	interferon-induced protein 44-like	1.20069	3.95991	3.97978
221921_PM_s_at	CADM3	cell adhesion molecule 3	1.28124	3.95056	15.8142
227095_PM_at	---	---	2.55015	3.89556	4.86151
231698_PM_at	FLJ36848	hypothetical LOC647115	2.62078	3.89496	4.13683
218856_PM_at	TNFRSF21	tumor necrosis factor receptor superfamily, member 21	2.59881	3.87406	4.18082
238121_PM_at	GK5	glycerol kinase 5 (putative)	3.25657	3.84475	3.08718
225123_PM_at	---	---	2.41087	3.82394	4.54055
228507_PM_at	---	---	2.53829	3.81649	2.75812
223454_PM_at	CXCL16	chemokine (C-X-C motif) ligand 16	2.53035	3.81108	3.30896
223333_PM_s_at	ANGPTL4	angiopoietin-like 4	3.08157	3.80914	10.2998
226192_PM_at	---	---	3.16184	3.80468	7.5892
212978_PM_at	LRRC8B	leucine rich repeat containing 8 family, member B	1.47036	3.79646	4.11329
210875_PM_s_at	ZEB1	zinc finger E-box binding homeobox 1	2.5705	3.78761	4.90221
218589_PM_at	LPAR6	lysophosphatidic acid receptor 6	2.20187	3.74301	5.28241
234989_PM_at	NEAT1	nuclear paraspeckle assembly transcript 1 (non-protein coding)	2.02487	3.74193	4.23813
200884_PM_at	CKB	creatine kinase, brain	3.42507	3.72912	2.66172
228716_PM_at	THRB	thyroid hormone receptor, beta (erythroblastic leukemia viral (v-erb-a) oncogene homolog 2, avian)	2.44429	3.72858	19.6629
208070_PM_s_at	REV3L	REV3-like, catalytic subunit of DNA polymerase zeta (yeast)	1.92486	3.69898	3.05311
218309_PM_at	CAMK2N1	calcium/calmodulin-dependent protein kinase II inhibitor 1	5.2088	3.69626	7.18685
212543_PM_at	AIM1	absent in melanoma 1	1.78264	3.67966	5.23377
209506_PM_s_at	NR2F1	nuclear receptor subfamily 2, group F, member 1	4.05057	3.65281	6.58734
213030_PM_s_at	PLXNA2	plexin A2	5.43919	3.64489	5.2044
201295_PM_s_at	WSB1	WD repeat and SOCS box-containing 1	1.39476	3.64088	4.89688
203865_PM_s_at	ADARB1	adenosine deaminase, RNA-specific, B1 (RED1 homolog rat)	3.96901	3.64063	3.75306
206336_PM_at	CXCL6	chemokine (C-X-C motif) ligand 6 (granulocyte chemotactic protein 2)	0.864802	3.60931	2.29731
235427_PM_at	---	---	3.57448	3.58758	4.13672
203001_PM_s_at	STMN2	stathmin-like 2	1.09552	3.58081	14.0461
227620_PM_at	SLC44A1	solute carrier family 44, member 1	3.20199	3.57129	5.35606
205698_PM_s_at	MAP2K6	mitogen-activated protein kinase kinase 6	1.19102	3.56731	4.26933
213182_PM_x_at	CDKN1C	cyclin-dependent kinase inhibitor 1C (p57, Kip2)	3.62735	3.56591	3.22348
217757_PM_at	A2M	alpha-2-macroglobulin	1.63723	3.55895	6.56231
212573_PM_at	ENDOD1	endonuclease domain containing 1	3.30693	3.55224	3.42521
204719_PM_at	ABCA8	ATP-binding cassette, sub-family A (ABC1), member 8	3.30437	3.55097	3.3937
1559965_PM_at	LOC100192378	hypothetical LOC100192378	3.32858	3.54507	4.36687
212570_PM_at	ENDOD1	endonuclease domain containing 1	4.28594	3.52346	3.77833
212713_PM_at	MFAP4	microfibrillar-associated protein 4	1.37274	3.5066	9.43378
214660_PM_at	PELO	Pelota homolog (Drosophila)	3.46277	3.49622	2.18608
1555103_PM_s_at	FGF7	fibroblast growth factor 7 (keratinocyte growth factor)	2.02772	3.49572	3.02073
227188_PM_at	C21orf63	chromosome 21 open reading frame 63	2.86332	3.47662	3.35956
227827_PM_at	---	---	2.72832	3.47547	3.70024
218087_PM_s_at	SORBS1	sorbin and SH3 domain containing 1	2.64443	3.4746	3.63214
214608_PM_s_at	EYA1	eyes absent homolog 1 (Drosophila)	1.19504	3.46818	4.22951
226197_PM_at	---	---	2.36926	3.46672	5.97288
202948_PM_at	IL1R1	interleukin 1 receptor, type I	1.55691	3.46668	3.77172
1559966_PM_a_at	LOC100192378	hypothetical LOC100192378	3.01368	3.46311	4.01227
236035_PM_at	---	---	1.79421	3.46076	5.68782
221572_PM_s_at	SLC26A6	solute carrier family 26, member 6	2.57854	3.4328	4.96327
205116_PM_at	LAMA2	laminin, alpha 2	1.66871	3.42575	8.95263
213519_PM_s_at	LAMA2	laminin, alpha 2	1.65003	3.4183	9.68879
239952_PM_at	ZEB1	zinc finger E-box binding homeobox 1	2.20373	3.41664	4.32614
225204_PM_at	PPTC7	PTC7 protein phosphatase homolog (S. cerevisiae)	1.29163	3.40855	6.27519
203680_PM_at	PRKAR2B	protein kinase, cAMP-dependent, regulatory, type II, beta	3.25718	3.40568	3.26385
201998_PM_at	ST6GAL1	ST6 beta-galactosamide alpha-2,6-sialyltranferase 1	1.56854	3.40516	6.00621
201601_PM_x_at	IFITM1	interferon induced transmembrane protein 1 (9-27)	1.31966	3.40025	5.49944
242767_PM_at	LMCD1	LIM and cysteine-rich domains 1	5.21734	3.39907	2.17929
224970_PM_at	NFIA	nuclear factor I/A	3.07914	3.39815	4.12131
214023_PM_x_at	TUBB2B	tubulin, beta 2B	1.25421	3.38788	1.64087
223464_PM_at	OSBPL5	oxysterol binding protein-like 5	2.8606	3.36039	4.02181
206697_PM_s_at	HP	haptoglobin	1.27937	3.3488	15.5865
208161_PM_s_at	ABCC3	ATP-binding cassette, sub-family C (CFTR/MRP), member 3	1.96571	3.34553	5.13723
213763_PM_at	HIPK2	homeodomain interacting protein kinase 2	2.44051	3.34311	3.75162
229831_PM_at	CNTN3	contactin 3 (plasmacytoma associated)	1.99952	3.32046	7.51878
203904_PM_x_at	CD82	CD82 molecule	1.64228	3.32006	4.03288
200648_PM_s_at	GLUL	glutamate-ammonia ligase (glutamine synthetase)	3.31752	3.29998	4.06796
243403_PM_x_at	CPM	carboxypeptidase M	3.32825	3.29154	3.21198
230051_PM_at	C10orf47	chromosome 10 open reading frame 47	3.33984	3.28253	2.89921
203186_PM_s_at	S100A4	S100 calcium binding protein A4	1.31339	3.27323	5.10796
217504_PM_at	ABCA6	ATP-binding cassette, sub-family A (ABC1), member 6	1.30057	3.27256	8.35744
227826_PM_s_at	---	---	2.617	3.26774	3.2943
206910_PM_x_at	CFHR2	complement factor H-related 2	2.01119	3.26463	4.42782
220187_PM_at	STEAP4	STEAP family member 4	1.02109	3.26231	3.1522
221541_PM_at	CRISPLD2	cysteine-rich secretory protein LCCL domain containing 2	3.1319	3.25601	1.68835
204136_PM_at	COL7A1	collagen, type VII, alpha 1	2.34228	3.25524	7.79089
1555345_PM_at	SLC38A4	solute carrier family 38, member 4	2.57938	3.25129	6.59198
243857_PM_at	MORF4L2	Mortality factor 4 like 2	2.71162	3.24098	2.66744
225571_PM_at	LIFR	leukemia inhibitory factor receptor alpha	1.09274	3.22301	1.65642
219049_PM_at	CSGALNACT1	chondroitin sulfate N-acetylgalactosaminyltransferase 1	0.86548	3.21429	2.17053
208396_PM_s_at	PDE1A	phosphodiesterase 1A, calmodulin-dependent	1.07519	3.20456	10.026
226908_PM_at	LRIG3	leucine-rich repeats and immunoglobulin-like domains 3	1.95507	3.18964	4.76297
228347_PM_at	SIX1	SIX homeobox 1	2.60727	3.17602	3.5203
210121_PM_at	B3GALT2	UDP-Gal:betaGlcNAc beta 1,3-galactosyltransferase, polypeptide 2	5.76134	3.16389	2.24634
235099_PM_at	CMTM8	CKLF-like MARVEL transmembrane domain containing 8	1.72994	3.1615	5.21086
234051_PM_at	---	---	2.86497	3.16004	3.4157
40837_PM_at	TLE2	transducin-like enhancer of split 2 (E(sp1) homolog, Drosophila)	1.28233	3.15365	6.01171
208763_PM_s_at	TSC22D3	TSC22 domain family, member 3	2.39062	3.11219	4.7361
209641_PM_s_at	ABCC3	ATP-binding cassette, sub-family C (CFTR/MRP), member 3	2.3386	3.10893	4.4357
225239_PM_at	---	---	1.68927	3.10816	3.54004
211862_PM_x_at	CFLAR	CASP8 and FADD-like apoptosis regulator	3.15549	3.09477	3.68087
1561418_PM_at	---	---	2.85945	3.06968	5.12507
227020_PM_at	YPEL2	yippee-like 2 (Drosophila)	1.73767	3.05519	5.97236
215388_PM_s_at	CFH /// CFHR1	complement factor H /// complement factor H-related 1	1.71587	3.05228	4.22285
217312_PM_s_at	COL7A1	collagen, type VII, alpha 1	2.16126	3.03182	6.6892
226961_PM_at	PRR15	proline rich 15	3.62582	3.03033	2.9923
214297_PM_at	CSPG4	chondroitin sulfate proteoglycan 4	2.69446	3.02649	2.83768
219315_PM_s_at	TMEM204	transmembrane protein 204	1.82702	3.02532	5.35481
244885_PM_at	---	---	0.912585	3.01727	3.89827
227062_PM_at	NEAT1	nuclear paraspeckle assembly transcript 1 (non-protein coding)	1.9819	3.01371	4.79062
223126_PM_s_at	C1orf21	chromosome 1 open reading frame 21	2.06456	3.00991	2.45406
208485_PM_x_at	CFLAR	CASP8 and FADD-like apoptosis regulator	3.01187	3.00735	3.53885
226857_PM_at	ARHGEF19	Rho guanine nucleotide exchange factor (GEF) 19	2.537	3.00327	3.263
213493_PM_at	SNED1	sushi, nidogen and EGF-like domains 1	0.974891	3.0016	8.76784
1554741_PM_s_at	FGF7 /// KGFLP1 /// KGFLP2	fibroblast growth factor 7 (keratinocyte growth factor) /// keratinocyte growth factor-like protein 1 /// keratinocyte growth factor-like protein 2	2.04716	2.99625	2.82365
206390_PM_x_at	PF4	platelet factor 4	1.97151	2.98768	3.96599
1557720_PM_s_at	MYO16	myosin XVI	2.71539	2.98197	6.6868
229801_PM_at	C10orf47	chromosome 10 open reading frame 47	2.77747	2.98032	2.83169
212807_PM_s_at	SORT1	sortilin 1	3.88799	2.97334	2.59547
221009_PM_s_at	ANGPTL4	angiopoietin-like 4	2.74719	2.96933	6.22277
229779_PM_at	COL4A4	collagen, type IV, alpha 4	2.17951	2.96895	3.34794
221214_PM_s_at	NELF	nasal embryonic LHRH factor	3.23299	2.96161	2.51235
218330_PM_s_at	NAV2	neuron navigator 2	3.82777	2.96127	4.90447
210564_PM_x_at	CFLAR	CASP8 and FADD-like apoptosis regulator	2.84758	2.96028	3.23716
209185_PM_s_at	IRS2	insulin receptor substrate 2	4.0342	2.95803	4.23882
204042_PM_at	WASF3	WAS protein family, member 3	2.16527	2.95717	4.30096
209763_PM_at	CHRDL1	chordin-like 1	0.837101	2.93569	1.29132
213652_PM_at	PCSK5	Proprotein convertase subtilisin/kexin type 5	1.57941	2.91754	6.17767
37022_PM_at	PRELP	proline/arginine-rich end leucine-rich repeat protein	1.82274	2.91174	10.7207
217202_PM_s_at	GLUL	glutamate-ammonia ligase (glutamine synthetase)	3.02538	2.91094	3.70715
222784_PM_at	SMOC1	SPARC related modular calcium binding 1	3.54358	2.90915	4.383
213056_PM_at	FRMD4B	FERM domain containing 4B	2.42004	2.90041	6.158
238669_PM_at	PTGS1	prostaglandin-endoperoxide synthase 1 (prostaglandin G/H synthase and cyclooxygenase)	1.70248	2.89356	9.60103
209184_PM_s_at	IRS2	insulin receptor substrate 2	4.46302	2.88441	3.90495
232180_PM_at	UGP2	UDP-glucose pyrophosphorylase 2	2.09048	2.88132	3.66408
212510_PM_at	GPD1L	glycerol-3-phosphate dehydrogenase 1-like	2.08415	2.88091	3.00775
231118_PM_at	ANKRD35	ankyrin repeat domain 35	1.75692	2.88053	3.97748
216840_PM_s_at	LAMA2	laminin, alpha 2	1.46459	2.87936	7.45044
1552508_PM_at	KCNE4	potassium voltage-gated channel, Isk-related family, member 4	1.40774	2.8763	4.73348
212670_PM_at	ELN	elastin	4.61437	2.87354	1.68081
201827_PM_at	SMARCD2	SWI/SNF related, matrix associated, actin dependent regulator of chromatin, subfamily d, member 2	1.89582	2.86517	3.82171
240897_PM_at	---	---	2.97682	2.86307	2.29691
1568598_PM_at	KAZALD1	Kazal-type serine peptidase inhibitor domain 1	4.04344	2.8556	2.43476
203088_PM_at	FBLN5	fibulin 5	2.89553	2.85336	3.86343
240556_PM_at	DCN	Decorin	2.3797	2.84825	2.19262
214486_PM_x_at	CFLAR	CASP8 and FADD-like apoptosis regulator	2.54832	2.8479	3.19455
224261_PM_at	---	---	2.48657	2.82358	2.42753
210147_PM_at	ART3	ADP-ribosyltransferase 3	2.1086	2.81709	13.5303
225016_PM_at	APCDD1	adenomatosis polyposis coli down-regulated 1	1.64952	2.80428	4.75784
207290_PM_at	PLXNA2	plexin A2	5.64854	2.7918	3.66151
205119_PM_s_at	FPR1	formyl peptide receptor 1	2.70986	2.78305	3.42698
204160_PM_s_at	ENPP4	ectonucleotide pyrophosphatase/phosphodiesterase 4 (putative function)	1.52947	2.77664	4.06299
231098_PM_at	---	---	2.24449	2.76695	3.30996
204916_PM_at	RAMP1	receptor (G protein-coupled) activity modifying protein 1	6.26768	2.76513	4.32829
203487_PM_s_at	ARMC8	armadillo repeat containing 8	2.42341	2.76347	2.8503
201700_PM_at	CCND3	cyclin D3	2.30834	2.76324	2.37016
205200_PM_at	CLEC3B	C-type lectin domain family 3, member B	1.30213	2.7626	4.57638
222062_PM_at	IL27RA	interleukin 27 receptor, alpha	2.30995	2.75734	4.96241
52255_PM_s_at	COL5A3	collagen, type V, alpha 3	1.45673	2.75518	8.05511
212660_PM_at	PHF15	PHD finger protein 15	2.05137	2.74664	3.62565
209335_PM_at	DCN	decorin	2.0278	2.74486	3.30011
224061_PM_at	INMT	indolethylamine N-methyltransferase	1.84951	2.73617	4.49876
220486_PM_x_at	TMEM164	transmembrane protein 164	1.83771	2.72387	3.31308
232825_PM_s_at	DSEL	dermatan sulfate epimerase-like	1.63423	2.70928	4.43616
205403_PM_at	IL1R2	interleukin 1 receptor, type II	1.03521	2.69884	2.73228
217452_PM_s_at	B3GALT2	UDP-Gal:betaGlcNAc beta 1,3-galactosyltransferase, polypeptide 2	5.3878	2.6818	1.94041
204326_PM_x_at	MT1X	metallothionein 1X	2.0149	2.64805	2.93223
232235_PM_at	DSEL	dermatan sulfate epimerase-like	1.77496	2.63856	3.75303
225116_PM_at	HIPK2	homeodomain interacting protein kinase 2	2.16253	2.63715	2.67741
205817_PM_at	SIX1	SIX homeobox 1	2.60902	2.62387	3.55857
202008_PM_s_at	NID1	nidogen 1	1.90434	2.62198	4.33484
242281_PM_at	---	---	2.36188	2.61719	4.17455
212758_PM_s_at	ZEB1	zinc finger E-box binding homeobox 1	1.97478	2.61614	3.08186
201743_PM_at	CD14	CD14 molecule	1.05655	2.6127	7.14913
214719_PM_at	SLC46A3	solute carrier family 46, member 3	2.8831	2.6007	4.80604
237400_PM_at	---	---	2.24746	2.5965	2.21468
242945_PM_at	FAM20A	family with sequence similarity 20, member A	0.853728	2.59038	1.22964
209508_PM_x_at	CFLAR	CASP8 and FADD-like apoptosis regulator	2.54359	2.58005	3.12498
224596_PM_at	SLC44A1	solute carrier family 44, member 1	2.08994	2.57447	2.97488
231337_PM_at	---	---	1.36971	2.57346	5.77307
211316_PM_x_at	CFLAR	CASP8 and FADD-like apoptosis regulator	2.59443	2.56926	2.71309
223531_PM_x_at	GPR89A /// GPR89B /// GPR89C	G protein-coupled receptor 89A /// G protein-coupled receptor 89B /// G protein-coupled receptor 89C	1.97792	2.56381	3.93731
225463_PM_x_at	GPR89A /// GPR89B /// GPR89C	G protein-coupled receptor 89A /// G protein-coupled receptor 89B /// G protein-coupled receptor 89C	1.81846	2.55892	3.64124
220642_PM_x_at	GPR89A /// GPR89B /// GPR89C	G protein-coupled receptor 89A /// G protein-coupled receptor 89B /// G protein-coupled receptor 89C	1.88918	2.55845	3.67858
209321_PM_s_at	ADCY3	adenylate cyclase 3	1.55969	2.55199	3.79055
204114_PM_at	NID2	nidogen 2 (osteonidogen)	2.74257	2.53852	2.03198
224595_PM_at	SLC44A1	solute carrier family 44, member 1	2.08846	2.53185	2.71114
225097_PM_at	HIPK2	homeodomain interacting protein kinase 2	2.31357	2.52973	2.64302
222140_PM_s_at	GPR89A /// GPR89B /// GPR89C	G protein-coupled receptor 89A /// G protein-coupled receptor 89B /// G protein-coupled receptor 89C	2.0265	2.52396	3.9409
228486_PM_at	SLC44A1	solute carrier family 44, member 1	1.91764	2.52375	4.66301
226665_PM_at	AHSA2	AHA1, activator of heat shock 90kDa protein ATPase homolog 2 (yeast)	1.42251	2.52232	3.26699
1556606_PM_at	NAV2	neuron navigator 2	2.46196	2.52056	5.38468
220244_PM_at	LOH3CR2A	loss of heterozygosity, 3, chromosomal region 2, gene A	3.73941	2.5081	3.34074
219028_PM_at	HIPK2	homeodomain interacting protein kinase 2	2.36118	2.50658	2.56639
218665_PM_at	FZD4	frizzled homolog 4 (Drosophila)	3.17862	2.49717	3.07741
223679_PM_at	CTNNB1	catenin (cadherin-associated protein), beta 1, 88kDa	2.29586	2.49332	2.84662
205357_PM_s_at	AGTR1	angiotensin II receptor, type 1	1.76549	2.4882	3.61433
214180_PM_at	MAN1C1	mannosidase, alpha, class 1C, member 1	0.99121	2.48761	16.2872
203486_PM_s_at	ARMC8	armadillo repeat containing 8	2.40359	2.48257	2.19936
218730_PM_s_at	OGN	osteoglycin	0.967456	2.48229	9.0168
225968_PM_at	PRICKLE2	prickle homolog 2 (Drosophila)	1.62287	2.4766	4.02215
227554_PM_at	---	---	1.79936	2.47078	3.67553
204575_PM_s_at	MMP19	matrix metallopeptidase 19	1.96297	2.46727	3.18031
202709_PM_at	FMOD	fibromodulin	1.20989	2.46707	4.62552
216598_PM_s_at	CCL2	chemokine (C-C motif) ligand 2	0.102418	2.46527	1.37499
222696_PM_at	AXIN2	axin 2	2.1602	2.46411	2.10596
201325_PM_s_at	EMP1	epithelial membrane protein 1	1.90752	2.45799	3.21724
225612_PM_s_at	B3GNT5	UDP-GlcNAc:betaGal beta-1,3-N-acetylglucosaminyltransferase 5	2.80395	2.45793	3.67558
224818_PM_at	SORT1	sortilin 1	3.44935	2.44942	2.61935
203886_PM_s_at	FBLN2	fibulin 2	0.907228	2.44673	4.49229
229310_PM_at	KLHL29	kelch-like 29 (Drosophila)	2.08624	2.44201	2.30939
213110_PM_s_at	COL4A5	collagen, type IV, alpha 5	1.60539	2.42603	4.80579
213714_PM_at	CACNB2	calcium channel, voltage-dependent, beta 2 subunit	1.34792	2.41655	5.75307
235076_PM_at	CALCOCO2	calcium binding and coiled-coil domain 2	2.17031	2.41556	3.20826
202371_PM_at	TCEAL4	transcription elongation factor A (SII)-like 4	2.04298	2.40088	2.3538
215001_PM_s_at	GLUL	glutamate-ammonia ligase (glutamine synthetase)	2.40027	2.39607	2.81909
201502_PM_s_at	NFKBIA	nuclear factor of kappa light polypeptide gene enhancer in B-cells inhibitor, alpha	2.64553	2.38775	2.04376
209939_PM_x_at	CFLAR	CASP8 and FADD-like apoptosis regulator	2.17573	2.38179	2.15938
213462_PM_at	NPAS2	neuronal PAS domain protein 2	1.76991	2.3786	5.49159
236038_PM_at	---	---	1.45564	2.37767	4.31484
210563_PM_x_at	CFLAR	CASP8 and FADD-like apoptosis regulator	2.32095	2.36756	2.29941
202017_PM_at	EPHX1	epoxide hydrolase 1, microsomal (xenobiotic)	1.85425	2.35052	4.31464
213800_PM_at	CFH	complement factor H	1.24992	2.34898	3.71189
205730_PM_s_at	ABLIM3	actin binding LIM protein family, member 3	2.03586	2.3482	3.68596
223623_PM_at	C2orf40	chromosome 2 open reading frame 40	1.20396	2.34728	10.6045
225368_PM_at	HIPK2	homeodomain interacting protein kinase 2	1.97363	2.3463	2.49811
209614_PM_at	ADH1B	alcohol dehydrogenase 1B (class I), beta polypeptide	1.33246	2.34378	4.80841
204526_PM_s_at	TBC1D8	TBC1 domain family, member 8 (with GRAM domain)	1.67734	2.34332	5.01118
223658_PM_at	KCNK6	potassium channel, subfamily K, member 6	4.08796	2.34318	1.64962
208581_PM_x_at	MT1X	metallothionein 1X	1.90476	2.32876	2.49346
231001_PM_at	FIBIN	fin bud initiation factor homolog (zebrafish)	0.506643	2.32431	3.25049
201531_PM_at	ZFP36	zinc finger protein 36, C3H type, homolog (mouse)	2.35966	2.31899	2.61849
202283_PM_at	SERPINF1	serpin peptidase inhibitor, clade F (alpha-2 antiplasmin, pigment epithelium derived factor), member 1	0.99935	2.31317	4.50193
209540_PM_at	IGF1	insulin-like growth factor 1 (somatomedin C)	0.755518	2.30665	0.80196
213488_PM_at	SNED1	sushi, nidogen and EGF-like domains 1	0.895601	2.30293	6.37133
207692_PM_s_at	ACAN	aggrecan	8.06282	2.30142	2.07697
217853_PM_at	TNS3	tensin 3	2.24002	2.29558	4.02646
213183_PM_s_at	CDKN1C	Cyclin-dependent kinase inhibitor 1C (p57, Kip2)	2.32158	2.29397	2.43792
216594_PM_x_at	AKR1C1	aldo-keto reductase family 1, member C1 (dihydrodiol dehydrogenase 1; 20-alpha (3-alpha)-hydroxysteroid dehydrogenase)	0.748049	2.29126	4.06832
234985_PM_at	LDLRAD3	low density lipoprotein receptor class A domain containing 3	1.03717	2.28617	3.7953
228959_PM_at	---	---	0.932083	2.28583	4.18671
205132_PM_at	ACTC1	actin, alpha, cardiac muscle 1	5.67433	2.28504	0.587066
230577_PM_at	---	---	1.55573	2.27903	3.75923
204290_PM_s_at	ALDH6A1	aldehyde dehydrogenase 6 family, member A1	2.03774	2.27265	2.51172
225115_PM_at	HIPK2	homeodomain interacting protein kinase 2	1.94839	2.27151	2.70034
209699_PM_x_at	AKR1C2	aldo-keto reductase family 1, member C2 (dihydrodiol dehydrogenase 2; bile acid binding protein; 3-alpha hydroxysteroid dehydrogenase, type III)	0.734423	2.26258	4.24615
220643_PM_s_at	FAIM	Fas apoptotic inhibitory molecule	2.00519	2.25529	2.4233
233181_PM_at	---	---	1.49483	2.25166	5.89428
204151_PM_x_at	AKR1C1	aldo-keto reductase family 1, member C1 (dihydrodiol dehydrogenase 1; 20-alpha (3-alpha)-hydroxysteroid dehydrogenase)	0.73787	2.24746	3.81726
39549_PM_at	NPAS2	neuronal PAS domain protein 2	1.51873	2.24475	5.04403
234233_PM_s_at	---	---	2.0177	2.24177	4.63348
201041_PM_s_at	DUSP1	dual specificity phosphatase 1	2.97673	2.23949	2.13999
209541_PM_at	IGF1	insulin-like growth factor 1 (somatomedin C)	0.588323	2.23727	0.70396
210817_PM_s_at	CALCOCO2	calcium binding and coiled-coil domain 2	2.00076	2.2356	2.44185
206101_PM_at	ECM2	extracellular matrix protein 2, female organ and adipocyte specific	1.05689	2.23333	5.42624
1552619_PM_a_at	ANLN	anillin, actin binding protein	2.95918	2.22578	0.861055
229163_PM_at	CAMK2N1	calcium/calmodulin-dependent protein kinase II inhibitor 1	2.84929	2.21579	3.63359
201963_PM_at	ACSL1	acyl-CoA synthetase long-chain family member 1	1.19499	2.21339	3.90267
223316_PM_at	CCDC3	coiled-coil domain containing 3	1.10254	2.21182	26.8735
218975_PM_at	COL5A3	collagen, type V, alpha 3	1.169	2.20576	5.0894
37996_PM_s_at	DMPK	dystrophia myotonica-protein kinase	2.53426	2.20481	2.40096
229014_PM_at	FLJ42709	hypothetical LOC441094	1.98055	2.20462	3.22605
218574_PM_s_at	LMCD1	LIM and cysteine-rich domains 1	2.68315	2.19808	2.51484
212021_PM_s_at	MKI67	antigen identified by monoclonal antibody Ki-67	2.82919	2.19658	0.76023
227425_PM_at	REPS2	RALBP1 associated Eps domain containing 2	0.941724	2.18829	6.12068
212235_PM_at	PLXND1	plexin D1	2.23584	2.1791	2.56317
211653_PM_x_at	AKR1C2	aldo-keto reductase family 1, member C2 (dihydrodiol dehydrogenase 2; bile acid binding protein; 3-alpha hydroxysteroid dehydrogenase, type III)	0.696862	2.16499	4.01645
213993_PM_at	SPON1	spondin 1, extracellular matrix protein	1.14185	2.16361	5.84897
205559_PM_s_at	PCSK5	proprotein convertase subtilisin/kexin type 5	1.26028	2.15697	4.74383
217161_PM_x_at	ACAN	aggrecan	7.64808	2.13793	2.03972
1557079_PM_at	ITGBL1	Integrin, beta-like 1 (with EGF-like repeat domains)	2.39888	2.13693	3.4646
208096_PM_s_at	COL21A1	collagen, type XXI, alpha 1	0.88895	2.11363	6.69297
1568779_PM_a_at	ECM2	extracellular matrix protein 2, female organ and adipocyte specific	1.49191	2.11291	4.90983
236234_PM_at	PDE1A	phosphodiesterase 1A, calmodulin-dependent	1.21478	2.1022	3.99862
237466_PM_s_at	HHIP	hedgehog interacting protein	5.64092	2.09443	0.751034
229572_PM_at	ATP6V0A2	ATPase, H+ transporting, lysosomal V0 subunit a2	2.27143	2.09044	2.34783
209211_PM_at	KLF5	Kruppel-like factor 5 (intestinal)	3.95237	2.08977	1.58346
209160_PM_at	AKR1C3	aldo-keto reductase family 1, member C3 (3-alpha hydroxysteroid dehydrogenase, type II)	0.61658	2.07883	3.02582
231993_PM_at	ITGBL1	Integrin, beta-like 1 (with EGF-like repeat domains)	1.98396	2.06931	2.44669
223611_PM_s_at	LNX1	ligand of numb-protein X 1	1.11092	2.06581	4.20129
239336_PM_at	THBS1	Thrombospondin 1	3.89975	2.06426	1.60569
209883_PM_at	GLT25D2	glycosyltransferase 25 domain containing 2	1.78554	2.0554	7.1394
205679_PM_x_at	ACAN	aggrecan	6.7117	1.99989	1.93378
208018_PM_s_at	HCK	hemopoietic cell kinase	1.40828	1.99055	5.67983
233547_PM_x_at	PDE1A	phosphodiesterase 1A, calmodulin-dependent	1.05695	1.98567	6.32927
236704_PM_at	---	---	1.1633	1.97366	3.31218
205450_PM_at	PHKA1	phosphorylase kinase, alpha 1 (muscle)	1.08075	1.97113	3.43721
229876_PM_at	PHKA1	phosphorylase kinase, alpha 1 (muscle)	0.985909	1.95814	4.0408
209212_PM_s_at	KLF5	Kruppel-like factor 5 (intestinal)	4.60288	1.95406	1.87407
218918_PM_at	MAN1C1	mannosidase, alpha, class 1C, member 1	1.06753	1.94535	11.1448
226953_PM_at	DARC	Duffy blood group, chemokine receptor	1.14509	1.92419	3.16068
228302_PM_x_at	CAMK2N1	calcium/calmodulin-dependent protein kinase II inhibitor 1	3.13505	1.92384	3.68227
227803_PM_at	ENPP5	ectonucleotide pyrophosphatase/phosphodiesterase 5 (putative function)	1.14903	1.92069	5.65667
205560_PM_at	PCSK5	proprotein convertase subtilisin/kexin type 5	1.16628	1.91984	4.88781
222599_PM_s_at	NAV2	neuron navigator 2	3.10617	1.91719	2.80026
223235_PM_s_at	SMOC2	SPARC related modular calcium binding 2	1.03886	1.90882	8.22944
230135_PM_at	---	---	8.00178	1.90649	0.850195
211538_PM_s_at	HSPA2	heat shock 70kDa protein 2	3.37937	1.90039	1.26084
202669_PM_s_at	EFNB2	ephrin-B2	1.66496	1.89627	3.55667
203836_PM_s_at	MAP3K5	mitogen-activated protein kinase kinase kinase 5	2.09814	1.89317	2.49842
235746_PM_s_at	PLA2R1	phospholipase A2 receptor 1, 180kDa	1.1587	1.88917	4.79917
214238_PM_at	---	---	1.77245	1.88617	4.86203
1555854_PM_at	---	---	0.820988	1.84437	5.60842
1552289_PM_a_at	CILP2	cartilage intermediate layer protein 2	1.42005	1.82076	7.2894
207808_PM_s_at	PROS1	protein S (alpha)	1.15051	1.81075	3.33581
212023_PM_s_at	MKI67	antigen identified by monoclonal antibody Ki-67	2.37538	1.78838	0.582408
209891_PM_at	SPC25	SPC25, NDC80 kinetochore complex component, homolog (S. cerevisiae)	2.04988	1.78379	0.581343
212338_PM_at	MYO1D	myosin ID	1.58481	1.78242	4.52999
226769_PM_at	FIBIN	fin bud initiation factor homolog (zebrafish)	0.547513	1.78142	2.54536
229978_PM_at	LOC729993	hypothetical protein LOC729993	1.32184	1.78078	4.27391
220117_PM_at	ZNF385D	zinc finger protein 385D	0.882561	1.75098	3.60667
213308_PM_at	SHANK2	SH3 and multiple ankyrin repeat domains 2	4.37975	1.74508	1.06647
228323_PM_at	CASC5	cancer susceptibility candidate 5	1.97161	1.73673	0.644884
204822_PM_at	TTK	TTK protein kinase	2.11716	1.71456	0.616333
1556037_PM_s_at	HHIP	hedgehog interacting protein	5.21664	1.68877	0.762853
201625_PM_s_at	INSIG1	insulin induced gene 1	0.466339	1.67138	1.50478
203362_PM_s_at	MAD2L1	MAD2 mitotic arrest deficient-like 1 (yeast)	1.69734	1.65762	0.590696
206632_PM_s_at	APOBEC3B	apolipoprotein B mRNA editing enzyme, catalytic polypeptide-like 3B	2.01378	1.65391	0.495974
203276_PM_at	LMNB1	lamin B1	2.07267	1.64937	0.544437
212067_PM_s_at	C1R	complement component 1, r subcomponent	0.629049	1.64257	2.86551
235743_PM_at	---	---	1.07848	1.63983	6.67551
221489_PM_s_at	SPRY4	sprouty homolog 4 (Drosophila)	3.07386	1.63797	4.37497
1553194_PM_at	NEGR1	neuronal growth regulator 1	2.73016	1.62964	2.51409
1555318_PM_at	HIF3A	hypoxia inducible factor 3, alpha subunit	1.33526	1.61637	3.71522
203143_PM_s_at	KIAA0040	KIAA0040	1.50369	1.60957	3.26201
1556069_PM_s_at	HIF3A	hypoxia inducible factor 3, alpha subunit	0.9774	1.60176	4.11584
204955_PM_at	SRPX	sushi-repeat-containing protein, X-linked	1.09388	1.60091	3.16743
1558680_PM_s_at	PDE1A	phosphodiesterase 1A, calmodulin-dependent	1.106	1.59697	3.93841
205733_PM_at	BLM	Bloom syndrome, RecQ helicase-like	2.23552	1.58703	0.596301
223044_PM_at	SLC40A1	solute carrier family 40 (iron-regulated transporter), member 1	1.13632	1.55747	5.50966
227354_PM_at	PAG1	phosphoprotein associated with glycosphingolipid microdomains 1	1.24889	1.55431	3.78708
229121_PM_at	CMKLR1	chemokine-like receptor 1	0.543459	1.52704	4.34481
1552680_PM_a_at	CASC5	cancer susceptibility candidate 5	2.34204	1.51484	0.665151
227654_PM_at	FAM65C	family with sequence similarity 65, member C	1.31555	1.51159	5.46671

## Sheet: 2 days Up (1.5 fold)
Probe set	Symbol	Gene title	Fold change day 2/day0	Fold change day 5/day0	Fold change day 10/day0
214456_PM_x_at	SAA1 /// SAA2	serum amyloid A1 /// serum amyloid A2	128.161	256.896	256.54
206100_PM_at	CPM	carboxypeptidase M	70.8026	53.9792	54.7112
228854_PM_at	---	---	62.2989	87.8864	119.352
207092_PM_at	LEP	leptin	51.4237	98.4663	237.88
206176_PM_at	BMP6	bone morphogenetic protein 6	49.2693	17.1685	13.0746
235019_PM_at	CPM	carboxypeptidase M	44.9431	32.0729	32.1638
224856_PM_at	FKBP5	FK506 binding protein 5	42.3914	58.0595	64.3334
218723_PM_s_at	C13orf15	chromosome 13 open reading frame 15	40.2485	38.2226	89.4049
235706_PM_at	CPM	carboxypeptidase M	37.91	23.546	25.2914
203697_PM_at	FRZB	frizzled-related protein	35.5932	53.6112	87.9592
203698_PM_s_at	FRZB	frizzled-related protein	34.6097	59.1805	99.9469
224840_PM_at	FKBP5	FK506 binding protein 5	27.3467	36.5369	42.5796
208607_PM_s_at	SAA1 /// SAA2	serum amyloid A1 /// serum amyloid A2	26.6069	65.2981	63.1168
227006_PM_at	PPP1R14A	protein phosphatase 1, regulatory (inhibitor) subunit 14A	26.5897	22.3913	15.0412
209167_PM_at	GPM6B	glycoprotein M6B	25.672	82.7419	207.577
209170_PM_s_at	GPM6B	glycoprotein M6B	25.4552	84.4994	230.634
211355_PM_x_at	LEPR	leptin receptor	24.7336	35.6415	49.4829
205907_PM_s_at	OMD	osteomodulin	23.9982	86.0106	196.983
211356_PM_x_at	LEPR	leptin receptor	23.7915	32.7659	45.8532
227762_PM_at	---	---	22.0101	30.2196	40.8823
220356_PM_at	CORIN	corin, serine peptidase	21.9643	67.7656	153.337
202409_PM_at	IGF2 /// INS-IGF2	insulin-like growth factor 2 (somatomedin A) /// INS-IGF2 readthrough transcript	20.783	29.0594	36.2031
212741_PM_at	MAOA	monoamine oxidase A	20.0301	42.5569	44.5282
239260_PM_at	CORIN	corin, serine peptidase	19.854	45.5396	88.6097
202410_PM_x_at	IGF2 /// INS-IGF2	insulin-like growth factor 2 (somatomedin A) /// INS-IGF2 readthrough transcript	19.2204	29.5284	38.125
239261_PM_s_at	CORIN	corin, serine peptidase	19.1464	42.3392	89.3331
211006_PM_s_at	KCNB1	potassium voltage-gated channel, Shab-related subfamily, member 1	18.5981	6.9618	6.49548
205883_PM_at	ZBTB16	zinc finger and BTB domain containing 16	18.4301	25.0996	35.8817
219478_PM_at	WFDC1	WAP four-disulfide core domain 1	18.0099	33.1132	16.089
211354_PM_s_at	LEPR	leptin receptor	16.9594	25.94	30.8
210881_PM_s_at	IGF2 /// INS-IGF2	insulin-like growth factor 2 (somatomedin A) /// INS-IGF2 readthrough transcript	14.4795	21.0545	29.114
204867_PM_at	GCHFR	GTP cyclohydrolase I feedback regulator	14.2157	11.135	21.2267
231929_PM_at	IKZF2	IKAROS family zinc finger 2 (Helios)	12.7006	8.49354	3.65002
213075_PM_at	OLFML2A	olfactomedin-like 2A	12.6423	34.2259	83.0141
205108_PM_s_at	APOB	apolipoprotein B (including Ag(x) antigen)	12.5155	25.1643	32.3089
227948_PM_at	FGD4	FYVE, RhoGEF and PH domain containing 4	12.4559	4.94188	5.39459
219304_PM_s_at	PDGFD	platelet derived growth factor D	11.5697	11.9739	18.6068
226931_PM_at	TMTC1	transmembrane and tetratricopeptide repeat containing 1	10.7088	12.3537	19.9925
213348_PM_at	CDKN1C	cyclin-dependent kinase inhibitor 1C (p57, Kip2)	10.3386	12.4812	11.9334
203126_PM_at	IMPA2	inositol(myo)-1(or 4)-monophosphatase 2	10.3115	9.20179	5.7554
224397_PM_s_at	TMTC1	transmembrane and tetratricopeptide repeat containing 1	10.2067	15.5949	16.1275
209894_PM_at	LEPR	leptin receptor	10.1798	13.6071	15.172
209612_PM_s_at	ADH1B	alcohol dehydrogenase 1B (class I), beta polypeptide	9.87884	21.1382	43.7522
220786_PM_s_at	SLC38A4	solute carrier family 38, member 4	9.73175	13.4772	24.8692
222253_PM_s_at	POM121L9P	POM121 membrane glycoprotein-like 9 (rat) pseudogene	9.56285	19.8577	21.2463
230214_PM_at	MRVI1	murine retrovirus integration site 1 homolog	9.52698	7.79431	6.12862
226322_PM_at	TMTC1	transmembrane and tetratricopeptide repeat containing 1	9.28443	13.6034	19.0762
209343_PM_at	EFHD1	EF-hand domain family, member D1	9.11079	6.95283	11.7941
205908_PM_s_at	OMD	osteomodulin	9.10083	43.134	108.539
238919_PM_at	---	---	9.01501	6.74384	11.2972
225987_PM_at	STEAP4	STEAP family member 4	8.99044	190.826	191.582
213948_PM_x_at		cell adhesion molecule 3	8.63809	74.4679	211.557
202724_PM_s_at	FOXO1	forkhead box O1	8.59853	15.72	26.6399
226047_PM_at	MRVI1	murine retrovirus integration site 1 homolog	8.58595	8.60565	7.29045
235751_PM_s_at	VMO1	vitelline membrane outer layer 1 homolog (chicken)	8.45568	26.4416	17.2224
204223_PM_at	PRELP	proline/arginine-rich end leucine-rich repeat protein	8.4428	16.1781	60.4161
1556997_PM_a_at	---	---	8.42366	17.1885	19.6006
203184_PM_at	FBN2	fibrillin 2	8.25761	15.7013	12.9705
207692_PM_s_at	ACAN	aggrecan	8.06282	2.30142	2.07697
230135_PM_at	---	---	8.00178	1.90649	0.850195
209613_PM_s_at	ADH1B	alcohol dehydrogenase 1B (class I), beta polypeptide	7.97544	17.6958	46.4164
204388_PM_s_at	MAOA	monoamine oxidase A	7.9294	26.2402	25.1699
221245_PM_s_at	FZD5	frizzled homolog 5 (Drosophila)	7.89041	5.54907	3.21391
206243_PM_at	TIMP4	TIMP metallopeptidase inhibitor 4	7.81033	19.8548	38.0272
202723_PM_s_at	FOXO1	forkhead box O1	7.79704	12.2213	20.5291
205608_PM_s_at	ANGPT1	angiopoietin 1	7.73833	11.4653	15.6579
204560_PM_at	FKBP5	FK506 binding protein 5	7.6883	8.21049	8.73129
217161_PM_x_at	ACAN	aggrecan	7.64808	2.13793	2.03972
241765_PM_at	CPM	carboxypeptidase M	7.34594	4.82392	5.19087
228224_PM_at	PRELP	proline/arginine-rich end leucine-rich repeat protein	7.30688	15.0141	59.4369
205382_PM_s_at	CFD	complement factor D (adipsin)	7.27466	27.8201	65.8428
236361_PM_at	GALNTL2	UDP-N-acetyl-alpha-D-galactosamine:polypeptide N-acetylgalactosaminyltransferase-like 2	7.25865	9.21771	7.70032
205609_PM_at	ANGPT1	angiopoietin 1	7.18119	12.4937	15.872
1556114_PM_a_at	DKFZp451A211	DKFZp451A211 protein	7.08484	7.01102	7.1698
206631_PM_at	PTGER2	prostaglandin E receptor 2 (subtype EP2), 53kDa	6.97127	7.69987	11.624
240869_PM_at	---	---	6.85714	4.63664	4.52825
224646_PM_x_at	H19	H19, imprinted maternally expressed transcript (non-protein coding)	6.8482	17.6265	16.0917
205679_PM_x_at	ACAN	aggrecan	6.7117	1.99989	1.93378
220180_PM_at	CCDC68	coiled-coil domain containing 68	6.70706	9.58008	28.7628
219737_PM_s_at	PCDH9	protocadherin 9	6.68662	5.86493	10.0628
229271_PM_x_at	COL11A1	collagen, type XI, alpha 1	6.63844	10.2524	14.009
203921_PM_at	CHST2	carbohydrate (N-acetylglucosamine-6-O) sulfotransferase 2	6.52244	8.80048	8.89926
201044_PM_x_at	DUSP1	dual specificity phosphatase 1	6.34065	4.39853	5.19933
204916_PM_at	RAMP1	receptor (G protein-coupled) activity modifying protein 1	6.26768	2.76513	4.32829
205083_PM_at	AOX1	aldehyde oxidase 1	6.26052	8.04718	10.0713
224550_PM_s_at	MRVI1	murine retrovirus integration site 1 homolog	6.25629	4.15547	3.53687
227032_PM_at	PLXNA2	plexin A2	5.92167	4.51623	6.00814
222860_PM_s_at	PDGFD	platelet derived growth factor D	5.91954	4.80506	8.58236
210121_PM_at	B3GALT2	UDP-Gal:betaGlcNAc beta 1,3-galactosyltransferase, polypeptide 2	5.76134	3.16389	2.24634
203021_PM_at	SLPI	secretory leukocyte peptidase inhibitor	5.76042	20.0062	36.2252
205132_PM_at	ACTC1	actin, alpha, cardiac muscle 1	5.67433	2.28504	0.587066
206496_PM_at	FMO3	flavin containing monooxygenase 3	5.66577	10.7527	24.3919
207761_PM_s_at	METTL7A	methyltransferase like 7A	5.66286	11.2851	17.8079
225177_PM_at	RAB11FIP1	RAB11 family interacting protein 1 (class I)	5.65026	6.00676	4.64495
207290_PM_at	PLXNA2	plexin A2	5.64854	2.7918	3.66151
237466_PM_s_at	HHIP	hedgehog interacting protein	5.64092	2.09443	0.751034
205713_PM_s_at	COMP	cartilage oligomeric matrix protein	5.63248	11.5928	19.3438
201427_PM_s_at	SEPP1	selenoprotein P, plasma, 1	5.59611	8.94683	21.9453
228501_PM_at	GALNTL2	UDP-N-acetyl-alpha-D-galactosamine:polypeptide N-acetylgalactosaminyltransferase-like 2	5.58901	7.6058	6.10696
227307_PM_at	TSPAN18	Tetraspanin 18	5.53623	10.2008	13.642
209189_PM_at	FOS	FBJ murine osteosarcoma viral oncogene homolog	5.46314	8.168	9.32638
235182_PM_at	ISM1	isthmin 1 homolog (zebrafish)	5.45647	25.5127	53.6799
209168_PM_at	GPM6B	glycoprotein M6B	5.45106	23.3687	68.8764
202037_PM_s_at	SFRP1	secreted frizzled-related protein 1	5.4432	7.71546	11.1211
213030_PM_s_at	PLXNA2	plexin A2	5.43919	3.64489	5.2044
214587_PM_at	COL8A1	collagen, type VIII, alpha 1	5.40794	6.83035	6.91521
234987_PM_at	---	---	5.40617	11.9577	24.0125
211597_PM_s_at	HOPX	HOP homeobox	5.40379	8.75925	28.9875
217452_PM_s_at	B3GALT2	UDP-Gal:betaGlcNAc beta 1,3-galactosyltransferase, polypeptide 2	5.3878	2.6818	1.94041
40665_PM_at	FMO3	flavin containing monooxygenase 3	5.38511	10.0837	23.8852
204502_PM_at	SAMHD1	SAM domain and HD domain 1	5.36448	11.7346	19.7824
219681_PM_s_at	RAB11FIP1	RAB11 family interacting protein 1 (class I)	5.33466	4.35351	2.84985
205082_PM_s_at	AOX1	aldehyde oxidase 1	5.22182	8.03952	10.2432
242767_PM_at	LMCD1	LIM and cysteine-rich domains 1	5.21734	3.39907	2.17929
1556037_PM_s_at	HHIP	hedgehog interacting protein	5.21664	1.68877	0.762853
212558_PM_at	SPRY1	sprouty homolog 1, antagonist of FGF signaling (Drosophila)	5.21329	6.03485	17.6434
218309_PM_at	CAMK2N1	calcium/calmodulin-dependent protein kinase II inhibitor 1	5.2088	3.69626	7.18685
206766_PM_at	ITGA10	integrin, alpha 10	5.19789	4.60826	8.62596
204720_PM_s_at	DNAJC6	DnaJ (Hsp40) homolog, subfamily C, member 6	5.11192	4.73805	4.04544
223402_PM_at	DUSP23	dual specificity phosphatase 23	5.04222	6.00398	5.85413
207255_PM_at	LEPR	leptin receptor	5.03415	6.88039	6.63564
206002_PM_at	GPR64	G protein-coupled receptor 64	5.029	13.9437	13.6291
219789_PM_at	NPR3	natriuretic peptide receptor C/guanylate cyclase C (atrionatriuretic peptide receptor C)	5.0126	4.84686	3.42308
208937_PM_s_at	ID1	inhibitor of DNA binding 1, dominant negative helix-loop-helix protein	4.97458	1.19057	0.163897
204457_PM_s_at	GAS1	growth arrest-specific 1	4.96262	7.88393	6.84376
219790_PM_s_at	NPR3	natriuretic peptide receptor C/guanylate cyclase C (atrionatriuretic peptide receptor C)	4.96001	4.9517	3.61921
202036_PM_s_at	SFRP1	secreted frizzled-related protein 1	4.81896	4.37925	4.53946
216894_PM_x_at	CDKN1C	cyclin-dependent kinase inhibitor 1C (p57, Kip2)	4.79098	5.11132	4.64181
235964_PM_x_at	---	---	4.76779	11.6795	19.1868
230958_PM_s_at	---	---	4.71361	6.08721	6.76674
202761_PM_s_at	SYNE2	spectrin repeat containing, nuclear envelope 2	4.68128	4.45121	4.01793
202035_PM_s_at	SFRP1	secreted frizzled-related protein 1	4.66787	7.75737	13.3697
228819_PM_at	TSPAN18	tetraspanin 18	4.64486	6.89811	8.77917
212670_PM_at	ELN	elastin	4.61437	2.87354	1.68081
209212_PM_s_at	KLF5	Kruppel-like factor 5 (intestinal)	4.60288	1.95406	1.87407
1559883_PM_s_at	SAMHD1	SAM domain and HD domain 1	4.59543	9.93137	21.1611
205582_PM_s_at	GGT5	gamma-glutamyltransferase 5	4.57263	8.47813	13.4432
219534_PM_x_at	CDKN1C	cyclin-dependent kinase inhibitor 1C (p57, Kip2)	4.57251	4.66555	4.27096
202861_PM_at	PER1	period homolog 1 (Drosophila)	4.55866	5.22466	5.63765
235529_PM_x_at	---	---	4.52582	11.771	20.3524
209184_PM_s_at	IRS2	insulin receptor substrate 2	4.46302	2.88441	3.90495
222513_PM_s_at	SORBS1	sorbin and SH3 domain containing 1	4.44146	4.03057	4.62
236936_PM_at	---	---	4.42426	9.3966	12.851
235122_PM_at	HIVEP3	human immunodeficiency virus type I enhancer binding protein 3	4.39845	4.49104	2.48553
227480_PM_at	SUSD2	sushi domain containing 2	4.39756	11.9513	14.6249
213308_PM_at	SHANK2	SH3 and multiple ankyrin repeat domains 2	4.37975	1.74508	1.06647
208510_PM_s_at	PPARG	peroxisome proliferator-activated receptor gamma	4.37958	8.80262	12.4741
219054_PM_at	C5orf23	chromosome 5 open reading frame 23	4.34574	4.52809	3.78964
226055_PM_at	ARRDC2	arrestin domain containing 2	4.32106	5.04012	11.9947
231798_PM_at	NOG	noggin	4.29877	5.98045	5.64574
212570_PM_at	ENDOD1	endonuclease domain containing 1	4.28594	3.52346	3.77833
213247_PM_at	SVEP1	sushi, von Willebrand factor type A, EGF and pentraxin domain containing 1	4.26824	6.47522	9.4611
228325_PM_at	KIAA0146	KIAA0146	4.2507	5.39498	3.02218
209505_PM_at	NR2F1	Nuclear receptor subfamily 2, group F, member 1	4.1731	5.10021	8.79361
229518_PM_at	FAM46B	family with sequence similarity 46, member B	4.09436	5.50088	4.57594
223658_PM_at	KCNK6	potassium channel, subfamily K, member 6	4.08796	2.34318	1.64962
242605_PM_at	---	---	4.07428	5.09597	3.16552
204897_PM_at	PTGER4	prostaglandin E receptor 4 (subtype EP4)	4.0735	6.58457	10.8345
213006_PM_at	CEBPD	CCAAT/enhancer binding protein (C/EBP), delta	4.05173	5.12365	2.83647
209506_PM_s_at	NR2F1	nuclear receptor subfamily 2, group F, member 1	4.05057	3.65281	6.58734
1568598_PM_at	KAZALD1	Kazal-type serine peptidase inhibitor domain 1	4.04344	2.8556	2.43476
209185_PM_s_at	IRS2	insulin receptor substrate 2	4.0342	2.95803	4.23882
226731_PM_at	PELO	Pelota homolog (Drosophila)	4.02261	4.3644	3.66209
206819_PM_at	POM121L9P	POM121 membrane glycoprotein-like 9 (rat) pseudogene	3.99409	8.93906	9.83847
36829_PM_at	PER1	period homolog 1 (Drosophila)	3.97606	4.82305	4.7747
203865_PM_s_at	ADARB1	adenosine deaminase, RNA-specific, B1 (RED1 homolog rat)	3.96901	3.64063	3.75306
1554997_PM_a_at	PTGS2	prostaglandin-endoperoxide synthase 2 (prostaglandin G/H synthase and cyclooxygenase)	3.95884	0.665184	0.703985
209211_PM_at	KLF5	Kruppel-like factor 5 (intestinal)	3.95237	2.08977	1.58346
228890_PM_at	ATOH8	atonal homolog 8 (Drosophila)	3.93362	0.872319	0.570022
239336_PM_at	THBS1	Thrombospondin 1	3.89975	2.06426	1.60569
212807_PM_s_at	SORT1	sortilin 1	3.88799	2.97334	2.59547
230463_PM_at	---	---	3.85402	12.577	20.5927
224901_PM_at	SCD5	stearoyl-CoA desaturase 5	3.83694	5.09107	5.51294
218330_PM_s_at	NAV2	neuron navigator 2	3.82777	2.96127	4.90447
202859_PM_x_at	IL8	interleukin 8	3.82657	5.69332	13.9063
37892_PM_at	COL11A1	collagen, type XI, alpha 1	3.81845	5.76599	7.05629
229011_PM_at	---	---	3.74257	6.53607	11.9727
220244_PM_at	LOH3CR2A	loss of heterozygosity, 3, chromosomal region 2, gene A	3.73941	2.5081	3.34074
202718_PM_at	IGFBP2	insulin-like growth factor binding protein 2, 36kDa	3.73786	4.00628	8.17064
227862_PM_at	TRNP1	TMF1-regulated nuclear protein 1	3.73367	5.16856	5.6875
204389_PM_at	MAOA	monoamine oxidase A	3.72974	9.74091	10.2245
204320_PM_at	COL11A1	collagen, type XI, alpha 1	3.69248	5.75409	7.08813
226806_PM_s_at	NFIA	nuclear factor I/A	3.6773	5.42136	6.51745
226814_PM_at	ADAMTS9	ADAM metallopeptidase with thrombospondin type 1 motif, 9	3.63097	4.20703	1.89901
228176_PM_at	S1PR3	sphingosine-1-phosphate receptor 3	3.62861	10.6023	10.7297
213182_PM_x_at	CDKN1C	cyclin-dependent kinase inhibitor 1C (p57, Kip2)	3.62735	3.56591	3.22348
226961_PM_at	PRR15	proline rich 15	3.62582	3.03033	2.9923
204748_PM_at	PTGS2	prostaglandin-endoperoxide synthase 2 (prostaglandin G/H synthase and cyclooxygenase)	3.59304	0.632369	0.803083
235427_PM_at	---	---	3.57448	3.58758	4.13672
222784_PM_at	SMOC1	SPARC related modular calcium binding 1	3.54358	2.90915	4.383
228653_PM_at	SAMD5	sterile alpha motif domain containing 5	3.52273	6.02223	8.09688
239638_PM_at	---	---	3.52065	5.78829	11.2223
232736_PM_s_at	POM121L8P /// POM121L9P	POM121 membrane glycoprotein-like 8 (rat) pseudogene /// POM121 membrane glycoprotein-like 9 (rat) pseudogene	3.51824	7.20735	7.98325
207826_PM_s_at	ID3	inhibitor of DNA binding 3, dominant negative helix-loop-helix protein	3.50225	1.38297	0.551596
213895_PM_at	EMP1	epithelial membrane protein 1	3.46495	6.22057	13.5665
214660_PM_at	PELO	Pelota homolog (Drosophila)	3.46277	3.49622	2.18608
213413_PM_at	STON1	stonin 1	3.45663	4.7265	6.98175
224818_PM_at	SORT1	sortilin 1	3.44935	2.44942	2.61935
224976_PM_at	NFIA	nuclear factor I/A	3.44227	4.22154	3.519
200884_PM_at	CKB	creatine kinase, brain	3.42507	3.72912	2.66172
204187_PM_at	GMPR	guanosine monophosphate reductase	3.4242	4.82534	5.91979
229623_PM_at	FLJ12993	Hypothetical LOC441027	3.41334	7.04553	7.41231
211317_PM_s_at	CFLAR	CASP8 and FADD-like apoptosis regulator	3.41257	3.98576	3.85447
219738_PM_s_at	PCDH9	protocadherin 9	3.40822	4.73877	7.81156
217767_PM_at	C3	complement component 3	3.38622	17.9575	25.3866
205782_PM_at	FGF7	fibroblast growth factor 7 (keratinocyte growth factor)	3.38225	4.53798	5.37522
211538_PM_s_at	HSPA2	heat shock 70kDa protein 2	3.37937	1.90039	1.26084
230051_PM_at	C10orf47	chromosome 10 open reading frame 47	3.33984	3.28253	2.89921
1559965_PM_at	LOC100192378	hypothetical LOC100192378	3.32858	3.54507	4.36687
243403_PM_x_at	CPM	carboxypeptidase M	3.32825	3.29154	3.21198
200648_PM_s_at	GLUL	glutamate-ammonia ligase (glutamine synthetase)	3.31752	3.29998	4.06796
212573_PM_at	ENDOD1	endonuclease domain containing 1	3.30693	3.55224	3.42521
204719_PM_at	ABCA8	ATP-binding cassette, sub-family A (ABC1), member 8	3.30437	3.55097	3.3937
229302_PM_at	TMEM178	transmembrane protein 178	3.25794	22.2971	43.2581
203680_PM_at	PRKAR2B	protein kinase, cAMP-dependent, regulatory, type II, beta	3.25718	3.40568	3.26385
238121_PM_at	GK5	glycerol kinase 5 (putative)	3.25657	3.84475	3.08718
224975_PM_at	NFIA	nuclear factor I/A	3.23919	4.19343	4.41411
238353_PM_at	RASL11A	RAS-like, family 11, member A	3.23309	1.42582	1.14583
221214_PM_s_at	NELF	nasal embryonic LHRH factor	3.23299	2.96161	2.51235
227620_PM_at	SLC44A1	solute carrier family 44, member 1	3.20199	3.57129	5.35606
205798_PM_at	IL7R	interleukin 7 receptor	3.18797	1.05129	0.504877
218665_PM_at	FZD4	frizzled homolog 4 (Drosophila)	3.17862	2.49717	3.07741
226192_PM_at	---	---	3.16184	3.80468	7.5892
211862_PM_x_at	CFLAR	CASP8 and FADD-like apoptosis regulator	3.15549	3.09477	3.68087
216269_PM_s_at	ELN	elastin	3.13659	1.28306	0.875621
228302_PM_x_at	CAMK2N1	calcium/calmodulin-dependent protein kinase II inhibitor 1	3.13505	1.92384	3.68227
221541_PM_at	CRISPLD2	cysteine-rich secretory protein LCCL domain containing 2	3.1319	3.25601	1.68835
222599_PM_s_at	NAV2	neuron navigator 2	3.10617	1.91719	2.80026
201787_PM_at	FBLN1	fibulin 1	3.10102	7.34102	12.6771
223333_PM_s_at	ANGPTL4	angiopoietin-like 4	3.08157	3.80914	10.2998
224970_PM_at	NFIA	nuclear factor I/A	3.07914	3.39815	4.12131
221489_PM_s_at	SPRY4	sprouty homolog 4 (Drosophila)	3.07386	1.63797	4.37497
209292_PM_at	ID4	Inhibitor of DNA binding 4, dominant negative helix-loop-helix protein	3.05389	1.2407	0.383901
236300_PM_at	---	---	3.0536	5.43962	3.79164
206091_PM_at	MATN3	matrilin 3	3.04032	4.78167	5.26191
217202_PM_s_at	GLUL	glutamate-ammonia ligase (glutamine synthetase)	3.02538	2.91094	3.70715
206756_PM_at	CHST7	carbohydrate (N-acetylglucosamine 6-O) sulfotransferase 7	3.0231	4.37342	3.42109
1559966_PM_a_at	LOC100192378	hypothetical LOC100192378	3.01368	3.46311	4.01227
208485_PM_x_at	CFLAR	CASP8 and FADD-like apoptosis regulator	3.01187	3.00735	3.53885
244419_PM_at	FRZB	Frizzled-related protein	2.99968	5.80754	11.1847
240897_PM_at	---	---	2.97682	2.86307	2.29691
201041_PM_s_at	DUSP1	dual specificity phosphatase 1	2.97673	2.23949	2.13999
226218_PM_at	IL7R	interleukin 7 receptor	2.97389	1.11789	0.394547
1552619_PM_a_at	ANLN	anillin, actin binding protein	2.95918	2.22578	0.861055
215119_PM_at	MYO16	myosin XVI	2.9461	5.34154	10.1911
201107_PM_s_at	THBS1	thrombospondin 1	2.94331	1.28686	1.10553
230290_PM_at	SCUBE3	signal peptide, CUB domain, EGF-like 3	2.94082	0.722492	0.40367
226611_PM_s_at	CENPV	centromere protein V	2.93981	1.25237	0.406911
222802_PM_at	EDN1	endothelin 1	2.90275	0.870032	0.739835
238178_PM_at	---	---	2.89887	6.39227	3.71195
203088_PM_at	FBLN5	fibulin 5	2.89553	2.85336	3.86343
214719_PM_at	SLC46A3	solute carrier family 46, member 3	2.8831	2.6007	4.80604
212886_PM_at	CCDC69	coiled-coil domain containing 69	2.86866	6.27079	4.91997
234051_PM_at	---	---	2.86497	3.16004	3.4157
227188_PM_at	C21orf63	chromosome 21 open reading frame 63	2.86332	3.47662	3.35956
223464_PM_at	OSBPL5	oxysterol binding protein-like 5	2.8606	3.36039	4.02181
1561418_PM_at	---	---	2.85945	3.06968	5.12507
214581_PM_x_at	TNFRSF21	tumor necrosis factor receptor superfamily, member 21	2.84985	4.51459	4.37387
229163_PM_at	CAMK2N1	calcium/calmodulin-dependent protein kinase II inhibitor 1	2.84929	2.21579	3.63359
210564_PM_x_at	CFLAR	CASP8 and FADD-like apoptosis regulator	2.84758	2.96028	3.23716
231262_PM_at	---	---	2.84175	4.9607	5.92429
228910_PM_at	---	---	2.8404	5.34994	7.53898
223775_PM_at	HHIP	hedgehog interacting protein	2.8353	1.22147	0.723539
212021_PM_s_at	MKI67	antigen identified by monoclonal antibody Ki-67	2.82919	2.19658	0.76023
215306_PM_at	---	---	2.82666	3.97545	7.61181
212239_PM_at	PIK3R1	phosphoinositide-3-kinase, regulatory subunit 1 (alpha)	2.81929	5.71558	6.10355
231031_PM_at	KGFLP2	keratinocyte growth factor-like protein 2	2.81496	4.30478	4.73928
228461_PM_at	SH3RF3	SH3 domain containing ring finger 3	2.80544	4.15365	4.54165
225612_PM_s_at	B3GNT5	UDP-GlcNAc:betaGal beta-1,3-N-acetylglucosaminyltransferase 5	2.80395	2.45793	3.67558
1552658_PM_a_at	NAV3	neuron navigator 3	2.79476	0.914509	0.594259
229801_PM_at	C10orf47	chromosome 10 open reading frame 47	2.77747	2.98032	2.83169
212240_PM_s_at	PIK3R1	phosphoinositide-3-kinase, regulatory subunit 1 (alpha)	2.75971	5.6161	6.49141
206029_PM_at	ANKRD1	ankyrin repeat domain 1 (cardiac muscle)	2.75412	0.913302	1.445
221009_PM_s_at	ANGPTL4	angiopoietin-like 4	2.74719	2.96933	6.22277
204114_PM_at	NID2	nidogen 2 (osteonidogen)	2.74257	2.53852	2.03198
1553194_PM_at	NEGR1	neuronal growth regulator 1	2.73016	1.62964	2.51409
227827_PM_at	---	---	2.72832	3.47547	3.70024
223541_PM_at	HAS3	hyaluronan synthase 3	2.7202	0.662111	0.278266
1557720_PM_s_at	MYO16	myosin XVI	2.71539	2.98197	6.6868
243857_PM_at	MORF4L2	Mortality factor 4 like 2	2.71162	3.24098	2.66744
205119_PM_s_at	FPR1	formyl peptide receptor 1	2.70986	2.78305	3.42698
226610_PM_at	CENPV	centromere protein V	2.69805	1.26581	0.513976
214297_PM_at	CSPG4	chondroitin sulfate proteoglycan 4	2.69446	3.02649	2.83768
218574_PM_s_at	LMCD1	LIM and cysteine-rich domains 1	2.68315	2.19808	2.51484
226933_PM_s_at	LOC100287917	hypothetical protein LOC100287917	2.65811	0.916197	0.494807
237753_PM_at	---	---	2.65328	0.736756	0.652919
231015_PM_at	KLF15	Kruppel-like factor 15	2.65309	3.96681	8.02574
201502_PM_s_at	NFKBIA	nuclear factor of kappa light polypeptide gene enhancer in B-cells inhibitor, alpha	2.64553	2.38775	2.04376
218087_PM_s_at	SORBS1	sorbin and SH3 domain containing 1	2.64443	3.4746	3.63214
207001_PM_x_at	TSC22D3	TSC22 domain family, member 3	2.63286	4.70512	9.41224
231698_PM_at	FLJ36848	hypothetical LOC647115	2.62078	3.89496	4.13683
227826_PM_s_at	---	---	2.617	3.26774	3.2943
205817_PM_at	SIX1	SIX homeobox 1	2.60902	2.62387	3.55857
228347_PM_at	SIX1	SIX homeobox 1	2.60727	3.17602	3.5203
218856_PM_at	TNFRSF21	tumor necrosis factor receptor superfamily, member 21	2.59881	3.87406	4.18082
211316_PM_x_at	CFLAR	CASP8 and FADD-like apoptosis regulator	2.59443	2.56926	2.71309
205226_PM_at	PDGFRL	platelet-derived growth factor receptor-like	2.58319	14.5828	26.1114
1555345_PM_at	SLC38A4	solute carrier family 38, member 4	2.57938	3.25129	6.59198
221572_PM_s_at	SLC26A6	solute carrier family 26, member 6	2.57854	3.4328	4.96327
210875_PM_s_at	ZEB1	zinc finger E-box binding homeobox 1	2.5705	3.78761	4.90221
219529_PM_at	CLIC3	chloride intracellular channel 3	2.56858	1.03179	0.544566
227095_PM_at	---	---	2.55015	3.89556	4.86151
214486_PM_x_at	CFLAR	CASP8 and FADD-like apoptosis regulator	2.54832	2.8479	3.19455
209508_PM_x_at	CFLAR	CASP8 and FADD-like apoptosis regulator	2.54359	2.58005	3.12498
217546_PM_at	MT1M	metallothionein 1M	2.53975	5.05053	4.03118
228507_PM_at	---	---	2.53829	3.81649	2.75812
226857_PM_at	ARHGEF19	Rho guanine nucleotide exchange factor (GEF) 19	2.537	3.00327	3.263
37996_PM_s_at	DMPK	dystrophia myotonica-protein kinase	2.53426	2.20481	2.40096
205500_PM_at	C5	complement component 5	2.53328	5.61386	3.50669
223454_PM_at	CXCL16	chemokine (C-X-C motif) ligand 16	2.53035	3.81108	3.30896
218995_PM_s_at	EDN1	endothelin 1	2.52899	1.0789	0.927858
228407_PM_at	SCUBE3	signal peptide, CUB domain, EGF-like 3	2.51899	0.97141	0.435431
202995_PM_s_at	FBLN1	fibulin 1	2.51368	5.0761	8.44197
203453_PM_at	SCNN1A	sodium channel, nonvoltage-gated 1 alpha	2.50637	4.7309	3.22519
224261_PM_at	---	---	2.48657	2.82358	2.42753
208998_PM_at	UCP2	uncoupling protein 2 (mitochondrial, proton carrier)	2.47646	4.84175	2.81578
232805_PM_at	---	---	2.47255	4.55087	10.5163
205128_PM_x_at	PTGS1	prostaglandin-endoperoxide synthase 1 (prostaglandin G/H synthase and cyclooxygenase)	2.47234	7.359	21.0808
242657_PM_at	---	---	2.47077	3.96137	3.634
212020_PM_s_at	MKI67	antigen identified by monoclonal antibody Ki-67	2.4694	1.34903	0.553862
1558706_PM_a_at	ATOH8	Atonal homolog 8 (Drosophila)	2.46403	0.984548	0.725397
1556606_PM_at	NAV2	neuron navigator 2	2.46196	2.52056	5.38468
226955_PM_at	AFAP1L1	actin filament associated protein 1-like 1	2.45907	8.89078	23.0124
1564796_PM_at	EMP1	epithelial membrane protein 1	2.45905	4.51465	7.07018
228716_PM_at	THRB	thyroid hormone receptor, beta (erythroblastic leukemia viral (v-erb-a) oncogene homolog 2, avian)	2.44429	3.72858	19.6629
213763_PM_at	HIPK2	homeodomain interacting protein kinase 2	2.44051	3.34311	3.75162
202388_PM_at	RGS2	regulator of G-protein signaling 2, 24kDa	2.43699	7.98523	5.95092
221991_PM_at	NXPH3	neurexophilin 3	2.42711	1.07364	1.28857
242002_PM_at	NKAIN2	Na+/K+ transporting ATPase interacting 2	2.4255	5.50877	13.9825
203487_PM_s_at	ARMC8	armadillo repeat containing 8	2.42341	2.76347	2.8503
213056_PM_at	FRMD4B	FERM domain containing 4B	2.42004	2.90041	6.158
215813_PM_s_at	PTGS1	prostaglandin-endoperoxide synthase 1 (prostaglandin G/H synthase and cyclooxygenase)	2.4134	8.03323	22.2866
225123_PM_at	---	---	2.41087	3.82394	4.54055
203486_PM_s_at	ARMC8	armadillo repeat containing 8	2.40359	2.48257	2.19936
215001_PM_s_at	GLUL	glutamate-ammonia ligase (glutamine synthetase)	2.40027	2.39607	2.81909
209074_PM_s_at	FAM107A	family with sequence similarity 107, member A	2.39936	6.34204	9.23693
1557079_PM_at	ITGBL1	Integrin, beta-like 1 (with EGF-like repeat domains)	2.39888	2.13693	3.4646
208763_PM_s_at	TSC22D3	TSC22 domain family, member 3	2.39062	3.11219	4.7361
223467_PM_at	RASD1	RAS, dexamethasone-induced 1	2.38266	6.51019	4.07516
240556_PM_at	DCN	Decorin	2.3797	2.84825	2.19262
241450_PM_at	RSPO1	R-spondin homolog (Xenopus laevis)	2.37726	4.57822	11.1265
212023_PM_s_at	MKI67	antigen identified by monoclonal antibody Ki-67	2.37538	1.78838	0.582408
226197_PM_at	---	---	2.36926	3.46672	5.97288
242281_PM_at	---	---	2.36188	2.61719	4.17455
219028_PM_at	HIPK2	homeodomain interacting protein kinase 2	2.36118	2.50658	2.56639
222680_PM_s_at	DTL	denticleless homolog (Drosophila)	2.36113	1.29432	0.476112
201531_PM_at	ZFP36	zinc finger protein 36, C3H type, homolog (mouse)	2.35966	2.31899	2.61849
233109_PM_at	COL12A1	Collagen, type XII, alpha 1	2.35478	4.64964	6.10958
225720_PM_at	SYNPO2	synaptopodin 2	2.34276	1.46083	0.545097
204136_PM_at	COL7A1	collagen, type VII, alpha 1	2.34228	3.25524	7.79089
1552680_PM_a_at	CASC5	cancer susceptibility candidate 5	2.34204	1.51484	0.665151
209641_PM_s_at	ABCC3	ATP-binding cassette, sub-family C (CFTR/MRP), member 3	2.3386	3.10893	4.4357
213183_PM_s_at	CDKN1C	Cyclin-dependent kinase inhibitor 1C (p57, Kip2)	2.32158	2.29397	2.43792
210563_PM_x_at	CFLAR	CASP8 and FADD-like apoptosis regulator	2.32095	2.36756	2.29941
225097_PM_at	HIPK2	homeodomain interacting protein kinase 2	2.31357	2.52973	2.64302
238463_PM_at	---	---	2.31086	5.31072	7.18795
208650_PM_s_at	CD24	CD24 molecule	2.3102	1.2979	0.614184
222062_PM_at	IL27RA	interleukin 27 receptor, alpha	2.30995	2.75734	4.96241
202994_PM_s_at	FBLN1	fibulin 1	2.3084	4.80203	7.50571
201700_PM_at	CCND3	cyclin D3	2.30834	2.76324	2.37016
223679_PM_at	CTNNB1	catenin (cadherin-associated protein), beta 1, 88kDa	2.29586	2.49332	2.84662
213068_PM_at	DPT	dermatopontin	2.28024	38.5549	218.524
1553102_PM_a_at	CCDC69	coiled-coil domain containing 69	2.27989	4.75268	3.90329
214433_PM_s_at	SELENBP1	selenium binding protein 1	2.2747	4.56197	4.23534
229572_PM_at	ATP6V0A2	ATPase, H+ transporting, lysosomal V0 subunit a2	2.27143	2.09044	2.34783
204470_PM_at	CXCL1	chemokine (C-X-C motif) ligand 1 (melanoma growth stimulating activity, alpha)	2.26366	20.6557	16.4833
227719_PM_at	SMAD9	SMAD family member 9	2.2539	0.789678	0.612318
237400_PM_at	---	---	2.24746	2.5965	2.21468
231098_PM_at	---	---	2.24449	2.76695	3.30996
217853_PM_at	TNS3	tensin 3	2.24002	2.29558	4.02646
212235_PM_at	PLXND1	plexin D1	2.23584	2.1791	2.56317
205733_PM_at	BLM	Bloom syndrome, RecQ helicase-like	2.23552	1.58703	0.596301
201755_PM_at	MCM5	minichromosome maintenance complex component 5	2.22857	1.41172	0.592858
239952_PM_at	ZEB1	zinc finger E-box binding homeobox 1	2.20373	3.41664	4.32614
218589_PM_at	LPAR6	lysophosphatidic acid receptor 6	2.20187	3.74301	5.28241
209169_PM_at	GPM6B	glycoprotein M6B	2.19717	10.1013	31.2783
229779_PM_at	COL4A4	collagen, type IV, alpha 4	2.17951	2.96895	3.34794
209939_PM_x_at	CFLAR	CASP8 and FADD-like apoptosis regulator	2.17573	2.38179	2.15938
235076_PM_at	CALCOCO2	calcium binding and coiled-coil domain 2	2.17031	2.41556	3.20826
209293_PM_x_at	ID4	inhibitor of DNA binding 4, dominant negative helix-loop-helix protein	2.16878	0.969439	0.357471
204042_PM_at	WASF3	WAS protein family, member 3	2.16527	2.95717	4.30096
225116_PM_at	HIPK2	homeodomain interacting protein kinase 2	2.16253	2.63715	2.67741
217312_PM_s_at	COL7A1	collagen, type VII, alpha 1	2.16126	3.03182	6.6892
222696_PM_at	AXIN2	axin 2	2.1602	2.46411	2.10596
212249_PM_at	PIK3R1	phosphoinositide-3-kinase, regulatory subunit 1 (alpha)	2.15201	4.63877	4.48495
220651_PM_s_at	MCM10	minichromosome maintenance complex component 10	2.13799	1.23274	0.471671
220161_PM_s_at	EPB41L4B	erythrocyte membrane protein band 4.1 like 4B	2.13299	0.627354	0.312167
239272_PM_at	MMP28	matrix metallopeptidase 28	2.12795	4.1367	3.81469
204823_PM_at	NAV3	neuron navigator 3	2.12595	0.862139	0.777365
228400_PM_at	SHROOM3	shroom family member 3	2.12145	0.780479	0.620267
204822_PM_at	TTK	TTK protein kinase	2.11716	1.71456	0.616333
210147_PM_at	ART3	ADP-ribosyltransferase 3	2.1086	2.81709	13.5303
228195_PM_at	C2orf88	chromosome 2 open reading frame 88	2.10521	0.849136	0.337029
203836_PM_s_at	MAP3K5	mitogen-activated protein kinase kinase kinase 5	2.09814	1.89317	2.49842
232180_PM_at	UGP2	UDP-glucose pyrophosphorylase 2	2.09048	2.88132	3.66408
224596_PM_at	SLC44A1	solute carrier family 44, member 1	2.08994	2.57447	2.97488
224595_PM_at	SLC44A1	solute carrier family 44, member 1	2.08846	2.53185	2.71114
229310_PM_at	KLHL29	kelch-like 29 (Drosophila)	2.08624	2.44201	2.30939
212510_PM_at	GPD1L	glycerol-3-phosphate dehydrogenase 1-like	2.08415	2.88091	3.00775
228582_PM_x_at	---	---	2.08413	0.822524	0.543638
204041_PM_at	MAOB	monoamine oxidase B	2.08405	3.96371	4.54974
212125_PM_at	RANGAP1	Ran GTPase activating protein 1	2.08152	0.878549	0.651341
203276_PM_at	LMNB1	lamin B1	2.07267	1.64937	0.544437
223126_PM_s_at	C1orf21	chromosome 1 open reading frame 21	2.06456	3.00991	2.45406
212660_PM_at	PHF15	PHD finger protein 15	2.05137	2.74664	3.62565
209891_PM_at	SPC25	SPC25, NDC80 kinetochore complex component, homolog (S. cerevisiae)	2.04988	1.78379	0.581343
206315_PM_at	CRLF1	cytokine receptor-like factor 1	2.04819	5.49134	11.543
1554741_PM_s_at	FGF7 /// KGFLP1 /// KGFLP2	fibroblast growth factor 7 (keratinocyte growth factor) /// keratinocyte growth factor-like protein 1 /// keratinocyte growth factor-like protein 2	2.04716	2.99625	2.82365
202371_PM_at	TCEAL4	transcription elongation factor A (SII)-like 4	2.04298	2.40088	2.3538
204290_PM_s_at	ALDH6A1	aldehyde dehydrogenase 6 family, member A1	2.03774	2.27265	2.51172
205730_PM_s_at	ABLIM3	actin binding LIM protein family, member 3	2.03586	2.3482	3.68596
209335_PM_at	DCN	decorin	2.0278	2.74486	3.30011
1555103_PM_s_at	FGF7	fibroblast growth factor 7 (keratinocyte growth factor)	2.02772	3.49572	3.02073
222140_PM_s_at	GPR89A /// GPR89B /// GPR89C	G protein-coupled receptor 89A /// G protein-coupled receptor 89B /// G protein-coupled receptor 89C	2.0265	2.52396	3.9409
234989_PM_at	NEAT1	nuclear paraspeckle assembly transcript 1 (non-protein coding)	2.02487	3.74193	4.23813
234233_PM_s_at	---	---	2.0177	2.24177	4.63348
204326_PM_x_at	MT1X	metallothionein 1X	2.0149	2.64805	2.93223
219230_PM_at	TMEM100	transmembrane protein 100	2.01401	13.9849	20.1469
206632_PM_s_at	APOBEC3B	apolipoprotein B mRNA editing enzyme, catalytic polypeptide-like 3B	2.01378	1.65391	0.495974
206910_PM_x_at	CFHR2	complement factor H-related 2	2.01119	3.26463	4.42782
219443_PM_at	TASP1	taspase, threonine aspartase, 1	2.01014	4.03916	2.3557
220643_PM_s_at	FAIM	Fas apoptotic inhibitory molecule	2.00519	2.25529	2.4233
210817_PM_s_at	CALCOCO2	calcium binding and coiled-coil domain 2	2.00076	2.2356	2.44185
229831_PM_at	CNTN3	contactin 3 (plasmacytoma associated)	1.99952	3.32046	7.51878
204456_PM_s_at	GAS1	growth arrest-specific 1	1.98786	4.12948	2.66038
231993_PM_at	ITGBL1	Integrin, beta-like 1 (with EGF-like repeat domains)	1.98396	2.06931	2.44669
227062_PM_at	NEAT1	nuclear paraspeckle assembly transcript 1 (non-protein coding)	1.9819	3.01371	4.79062
229014_PM_at	FLJ42709	hypothetical LOC441094	1.98055	2.20462	3.22605
223531_PM_x_at	GPR89A /// GPR89B /// GPR89C	G protein-coupled receptor 89A /// G protein-coupled receptor 89B /// G protein-coupled receptor 89C	1.97792	2.56381	3.93731
210729_PM_at	NPY2R	neuropeptide Y receptor Y2	1.9757	6.20362	15.3494
219398_PM_at	CIDEC	cell death-inducing DFFA-like effector c	1.97559	6.59153	11.982
212758_PM_s_at	ZEB1	zinc finger E-box binding homeobox 1	1.97478	2.61614	3.08186
225368_PM_at	HIPK2	homeodomain interacting protein kinase 2	1.97363	2.3463	2.49811
228323_PM_at	CASC5	cancer susceptibility candidate 5	1.97161	1.73673	0.644884
206390_PM_x_at	PF4	platelet factor 4	1.97151	2.98768	3.96599
208161_PM_s_at	ABCC3	ATP-binding cassette, sub-family C (CFTR/MRP), member 3	1.96571	3.34553	5.13723
204575_PM_s_at	MMP19	matrix metallopeptidase 19	1.96297	2.46727	3.18031
226908_PM_at	LRIG3	leucine-rich repeats and immunoglobulin-like domains 3	1.95507	3.18964	4.76297
225115_PM_at	HIPK2	homeodomain interacting protein kinase 2	1.94839	2.27151	2.70034
1553535_PM_a_at	RANGAP1	Ran GTPase activating protein 1	1.94024	0.879176	0.542903
208070_PM_s_at	REV3L	REV3-like, catalytic subunit of DNA polymerase zeta (yeast)	1.92486	3.69898	3.05311
228486_PM_at	SLC44A1	solute carrier family 44, member 1	1.91764	2.52375	4.66301
201325_PM_s_at	EMP1	epithelial membrane protein 1	1.90752	2.45799	3.21724
208581_PM_x_at	MT1X	metallothionein 1X	1.90476	2.32876	2.49346
202008_PM_s_at	NID1	nidogen 1	1.90434	2.62198	4.33484
220639_PM_at	TM4SF20	transmembrane 4 L six family member 20	1.90113	4.05432	1.53998
1560879_PM_a_at	SYT15	synaptotagmin XV	1.90079	0.646185	0.405206
234951_PM_s_at	COL12A1	collagen, type XII, alpha 1	1.8961	0.656343	0.425026
201827_PM_at	SMARCD2	SWI/SNF related, matrix associated, actin dependent regulator of chromatin, subfamily d, member 2	1.89582	2.86517	3.82171
220642_PM_x_at	GPR89A /// GPR89B /// GPR89C	G protein-coupled receptor 89A /// G protein-coupled receptor 89B /// G protein-coupled receptor 89C	1.88918	2.55845	3.67858
209291_PM_at	ID4	inhibitor of DNA binding 4, dominant negative helix-loop-helix protein	1.87825	0.807111	0.357686
202017_PM_at	EPHX1	epoxide hydrolase 1, microsomal (xenobiotic)	1.85425	2.35052	4.31464
224061_PM_at	INMT	indolethylamine N-methyltransferase	1.84951	2.73617	4.49876
244745_PM_at	RERG	RAS-like, estrogen-regulated, growth inhibitor	1.84772	5.94462	15.6217
223468_PM_s_at	RGMA	RGM domain family, member A	1.84742	4.23981	3.75278
220486_PM_x_at	TMEM164	transmembrane protein 164	1.83771	2.72387	3.31308
219315_PM_s_at	TMEM204	transmembrane protein 204	1.82702	3.02532	5.35481
203304_PM_at	BAMBI	BMP and activin membrane-bound inhibitor homolog (Xenopus laevis)	1.8269	0.790486	0.439442
37022_PM_at	PRELP	proline/arginine-rich end leucine-rich repeat protein	1.82274	2.91174	10.7207
225463_PM_x_at	GPR89A /// GPR89B /// GPR89C	G protein-coupled receptor 89A /// G protein-coupled receptor 89B /// G protein-coupled receptor 89C	1.81846	2.55892	3.64124
227554_PM_at	---	---	1.79936	2.47078	3.67553
227758_PM_at	RERG	RAS-like, estrogen-regulated, growth inhibitor	1.79631	7.31172	19.2898
236035_PM_at	---	---	1.79421	3.46076	5.68782
209840_PM_s_at	LRRN3	leucine rich repeat neuronal 3	1.79001	0.408835	0.523011
209883_PM_at	GLT25D2	glycosyltransferase 25 domain containing 2	1.78554	2.0554	7.1394
212543_PM_at	AIM1	absent in melanoma 1	1.78264	3.67966	5.23377
203435_PM_s_at	MME	membrane metallo-endopeptidase	1.77863	6.63048	10.8914
209436_PM_at	SPON1	spondin 1, extracellular matrix protein	1.77541	10.8534	25.8559
232235_PM_at	DSEL	dermatan sulfate epimerase-like	1.77496	2.63856	3.75303
214238_PM_at	---	---	1.77245	1.88617	4.86203
213462_PM_at	NPAS2	neuronal PAS domain protein 2	1.76991	2.3786	5.49159
205818_PM_at	DBC1	deleted in bladder cancer 1	1.76798	4.75287	5.946
205357_PM_s_at	AGTR1	angiotensin II receptor, type 1	1.76549	2.4882	3.61433
239273_PM_s_at	MMP28	matrix metallopeptidase 28	1.75915	5.67159	4.07928
231118_PM_at	ANKRD35	ankyrin repeat domain 35	1.75692	2.88053	3.97748
204709_PM_s_at	KIF23	kinesin family member 23	1.75005	1.42173	0.543941
210983_PM_s_at	MCM7	minichromosome maintenance complex component 7	1.74549	1.25171	0.502366
227020_PM_at	YPEL2	yippee-like 2 (Drosophila)	1.73767	3.05519	5.97236
203628_PM_at	IGF1R	insulin-like growth factor 1 receptor	1.73102	0.516078	0.415291
235099_PM_at	CMTM8	CKLF-like MARVEL transmembrane domain containing 8	1.72994	3.1615	5.21086
215388_PM_s_at	CFH /// CFHR1	complement factor H /// complement factor H-related 1	1.71587	3.05228	4.22285
235609_PM_at	---	---	1.70673	0.988482	0.260857
201525_PM_at	APOD	apolipoprotein D	1.70281	6.4255	69.9264
238669_PM_at	PTGS1	prostaglandin-endoperoxide synthase 1 (prostaglandin G/H synthase and cyclooxygenase)	1.70248	2.89356	9.60103
203362_PM_s_at	MAD2L1	MAD2 mitotic arrest deficient-like 1 (yeast)	1.69734	1.65762	0.590696
225239_PM_at	---	---	1.68927	3.10816	3.54004
205805_PM_s_at	ROR1	receptor tyrosine kinase-like orphan receptor 1	1.6844	0.611735	0.340866
236532_PM_at	C11orf87	chromosome 11 open reading frame 87	1.68273	0.993774	0.336999
204491_PM_at	PDE4D	phosphodiesterase 4D, cAMP-specific (phosphodiesterase E3 dunce homolog, Drosophila)	1.68207	5.14539	3.19751
204526_PM_s_at	TBC1D8	TBC1 domain family, member 8 (with GRAM domain)	1.67734	2.34332	5.01118
227899_PM_at	VIT	vitrin	1.6773	4.35244	14.7959
205116_PM_at	LAMA2	laminin, alpha 2	1.66871	3.42575	8.95263
202669_PM_s_at	EFNB2	ephrin-B2	1.66496	1.89627	3.55667
207977_PM_s_at	DPT	dermatopontin	1.65017	20.4647	118.377
213519_PM_s_at	LAMA2	laminin, alpha 2	1.65003	3.4183	9.68879
225016_PM_at	APCDD1	adenomatosis polyposis coli down-regulated 1	1.64952	2.80428	4.75784
209016_PM_s_at	KRT7	keratin 7	1.64616	1.01074	0.353398
209301_PM_at	CA2	carbonic anhydrase II	1.64346	11.9479	4.76403
203434_PM_s_at	MME	membrane metallo-endopeptidase	1.64322	5.60205	8.19456
203904_PM_x_at	CD82	CD82 molecule	1.64228	3.32006	4.03288
217757_PM_at	A2M	alpha-2-macroglobulin	1.63723	3.55895	6.56231
232825_PM_s_at	DSEL	dermatan sulfate epimerase-like	1.63423	2.70928	4.43616
225968_PM_at	PRICKLE2	prickle homolog 2 (Drosophila)	1.62287	2.4766	4.02215
228962_PM_at	PDE4D	phosphodiesterase 4D, cAMP-specific (phosphodiesterase E3 dunce homolog, Drosophila)	1.61893	4.20003	2.30944
211681_PM_s_at	PDLIM5	PDZ and LIM domain 5	1.61173	0.641066	0.365665
213110_PM_s_at	COL4A5	collagen, type IV, alpha 5	1.60539	2.42603	4.80579
224997_PM_x_at	H19	H19, imprinted maternally expressed transcript (non-protein coding)	1.59153	4.22842	3.26059
212338_PM_at	MYO1D	myosin ID	1.58481	1.78242	4.52999
213652_PM_at	PCSK5	Proprotein convertase subtilisin/kexin type 5	1.57941	2.91754	6.17767
211677_PM_x_at	CADM3	cell adhesion molecule 3	1.57357	4.74625	13.7899
201998_PM_at	ST6GAL1	ST6 beta-galactosamide alpha-2,6-sialyltranferase 1	1.56854	3.40516	6.00621
209321_PM_s_at	ADCY3	adenylate cyclase 3	1.55969	2.55199	3.79055
202948_PM_at	IL1R1	interleukin 1 receptor, type I	1.55691	3.46668	3.77172
230577_PM_at	---	---	1.55573	2.27903	3.75923
232027_PM_at	SYNE1	spectrin repeat containing, nuclear envelope 1	1.55566	0.52337	0.471142
231773_PM_at	ANGPTL1	angiopoietin-like 1	1.54764	5.19545	4.19015
220122_PM_at	MCTP1	multiple C2 domains, transmembrane 1	1.53268	1.07954	3.49409
204160_PM_s_at	ENPP4	ectonucleotide pyrophosphatase/phosphodiesterase 4 (putative function)	1.52947	2.77664	4.06299
218934_PM_s_at	HSPB7	heat shock 27kDa protein family, member 7 (cardiovascular)	1.52298	0.421215	0.365645
39549_PM_at	NPAS2	neuronal PAS domain protein 2	1.51873	2.24475	5.04403
221258_PM_s_at	KIF18A	kinesin family member 18A	1.51458	0.925373	0.452732
1553565_PM_s_at	DDAH1	dimethylarginine dimethylaminohydrolase 1	1.50851	0.408255	0.348626
203143_PM_s_at	KIAA0040	KIAA0040	1.50369	1.60957	3.26201
210935_PM_s_at	WDR1	WD repeat domain 1	1.50253	0.851348	0.433381
235740_PM_at	---	---	1.49986	1.31873	4.09958
