# Supplementary material for: PLZF targets developmental enhancers for activation during osteogenic differentiation of human mesenchymal stem cells
Source: eLife. 2019 Jan 23;8:e40364. doi: 10.7554/eLife.40364 (PMC6344081; doi:10.7554/eLife.40364)
Supplement: Supplementary file 2. [file elife-40364-supp2.xlsx]

## Sheet: K4me3Gain-ExpressionGain-K27meL
											Expression from RNA seq			Changes in histone mark (ChIP seq)
Chromosome	Start	End	Strand	TranscriptId	Accn	LocusId	Symbol	GeneId	Transcript length	#exons	Expression adj. p-value(10ddiff Vs naive hMSC)	log2FC in expression (10ddiff / naive hMSC)	Regulation of expression (10ddiff Vs naive hMSC)	log2(H3K4me3_d10 / K4me3_d0 naive hMSC)	log2(H3K27me3_d10 / K27me3_d0 naive hMSC)	log2(H3K27ac_d10 / K27ac_d0 naive hMSC)
chr1	248058889	248059833	+	GXT_21913849	NM_001001957	GXL_744535	OR2W3	343171	945	1	0.551	1.18	up	1.59914	-0.196393	2.67998
chr15	57884102	57977562	+	GXT_21913923	NM_001018100	GXL_4910	GRINL1A	81488	2398	13	0.253	0.91	up	1.15335	-0.0192271	0.0533727
chr16	19125254	19132952	+	GXT_21913948	NM_001034841	GXL_664172	ITPRIPL2	162073	7699	1	2.37e-59	0.89	up	1.35881	-0.18895	0.127099
chr19	1000437	1009723	+	GXT_21913970	NM_138690	GXL_316764	GRIN3B	116444	3254	9	0.00114	1.96	up	1.83181	-0.696863	0.0655703
chr6	106959730	107018335	+	GXT_21914040	NM_001624	GXL_261185	AIM1	202	7553	20	1.39e-15	0.86	up	1.05233	0.0260879	0.641313
chr1	38259774	38267278	+	GXT_21914102	NM_001031740	GXL_316525	MANEAL	149175	2581	4	0.00442	0.92	up	2.33328	-0.685511	0.916777
chr2	96012768	96051825	+	GXT_21914218	NM_001034914	GXL_1230033	KCNIP3	30818	2721	8	4.19e-42	6.75	up	2.37055	-0.484273	1.15299
chr8	1772149	1906807	+	GXT_21914298	NM_014629	GXL_316991	ARHGEF10	9639	5591	29	2.3e-25	0.58	up	1.25266	-0.299115	0.00821223
chr1	27320195	27327377	+	GXT_21914344	NM_001013642	GXL_316523	TRNP1	388610	1949	2	0	3.62	up	2.96083	-1.4944	0.787332
chr15	68117941	68126174	+	GXT_21914413	NM_001031807	GXL_316682	SKOR1	390598	2767	10	0.516	1	up	2.61345	-0.0651397	-0.286037
chr17	77751977	77761449	+	GXT_21914445	NM_005189	GXL_175536	CBX2	84733	4265	5	0.0244	0.86	up	1.37984	-0.229975	0.104276
chr19	18111944	18124911	+	GXT_21914458	NM_001025604	GXL_262453	ARRDC2	27106	2525	8	0	3.21	up	1.36208	-0.560919	1.1083
chr2	207026952	207027083	+	GXT_21914472	NR_002590	GXL_1230802	EEF1B2/SNORA41	-2	132	1	0.776	0.75	up	2.83584	-0.16218	0.337004
chr20	32254304	32256331	+	GXT_21914485	NM_001024675	GXL_316830	C20orf134	170487	2028	1	0.000724	1.09	up	1.94129	-0.810366	0.139329
chr6	147829828	147891157	+	GXT_21914554	NM_001030060	GXL_316959	SAMD5	389432	6324	2	3.71e-94	2.04	up	1.83464	0.131469	0.551763
chr7	1022835	1029276	+	GXT_21914568	NM_017781	GXL_35185	CYP2W1	54905	2304	9	0.776	1.49	up	2.14179	-0.364465	-0.434388
chr11	44587141	44641339	+	GXT_21914638	NM_001024844	GXL_170777	CD82	3732	1640	9	3.38e-110	1.64	up	1.4974	-1.23977	-0.127813
chr16	21689835	21772050	+	GXT_21914690	NM_144672	GXL_692342	OTOA	146183	3611	28	1	0.52	up	2.14179	0.057004	-0.356016
chr16	28303840	28335170	+	GXT_21914696	NM_001024401	GXL_316707	SBK1	388228	4992	4	1	1.33	up	1.12339	-0.258607	-0.377728
chr17	4692254	4693884	+	GXT_21914706	NM_001014985	GXL_316732	GLTPD2	388323	1222	4	0.16	0.87	up	1	-0.718724	0.379129
chr2	42275161	42285668	+	GXT_21914740	NM_138370	GXL_316794	PKDCC	91461	2500	7	1.49e-46	2	up	1.71046	-1.33936	-0.161004
chr2	201450731	201536218	+	GXT_21914742	NM_001159	GXL_316815	AOX1	316	4934	35	0	5.01	up	1.16519	-0.471761	1.32103
chr20	35504570	35522632	+	GXT_21914746	NM_080628	GXL_132664	C20orf118	140711	2041	7	1.55e-202	3.1	up	1.18096	-0.592572	-0.025983
chr5	76506706	76724081	+	GXT_21914778	NM_001029851	GXL_6003	PDE8B	8622	4114	19	2.06e-36	2.34	up	1.56672	0.082306	0.770761
chr5	76506706	76724081	+	GXT_21914779	NM_001029852	GXL_6003	PDE8B	8622	4240	21	5.2e-37	2.33	up	1.56672	0.082329	0.77074
chr5	76506706	76724081	+	GXT_21914780	NM_001029853	GXL_6003	PDE8B	8622	4345	21	1.6e-35	2.38	up	1.56672	0.0823402	0.770721
chr5	76506706	76724081	+	GXT_21914781	NM_001029854	GXL_6003	PDE8B	8622	4264	21	1.14e-35	2.36	up	1.56672	0.0823588	0.770725
chr1	203309752	203320289	-	GXT_21914858	NM_002023	GXL_151201	FMOD	2331	2986	3	1.47e-186	1.31	up	1.0285	-0.232078	0.217488
chr19	11504732	11530018	-	GXT_21915148	NM_001035223	GXL_3538	RGL3	57139	2543	19	8.52e-12	3.93	up	1.45583	-0.439673	0.999593
chr4	83550690	83720010	-	GXT_21915206	NM_001037582	GXL_220918	SCD5	79966	3103	5	1e-56	1.44	up	1.57189	-0.125471	0.618609
chr15	65032093	65067770	-	GXT_21915358	NM_194272	GXL_189888	RBPMS2	348093	1996	8	0.181	0.82	up	1.12531	-0.136979	0.12114
chr15	72452147	72490136	-	GXT_21915359	NM_001012642	GXL_189854	GRAMD2	196996	3292	12	0.0516	1.88	up	1.49581	-0.439919	1.49517
chr16	1535940	1538468	-	GXT_21915368	NM_001013658	GXL_316695	PTX4	390667	1422	3	0.639	1.26	up	1.43646	-0.744765	-1.76286
chr2	99235569	99347589	-	GXT_21915405	NM_012214	GXL_72530	MGAT4A	11320	8382	16	0.022	2.56	up	1.74358	0.538219	0.62289
chr7	47314752	47621742	-	GXT_21915508	NM_022748	GXL_97690	TNS3	64759	7619	31	0	2.1	up	2.37341	-1.8251	-0.191179
chr1	182350839	182361341	-	GXT_21915568	NM_001033044	GXL_151294	GLUL	2752	4364	7	0	3.81	up	1.01127	-0.658356	1.17347
chr1	182350839	182360539	-	GXT_21915570	NM_001033056	GXL_151294	GLUL	2752	4066	7	0	3.81	up	1.51047	-0.58957	1.79736
chr17	63524681	63557740	-	GXT_21915648	NM_004655	GXL_692649	AXIN2/CCDC46	-2	4234	11	4.53e-50	2.24	up	1.44086	-0.950361	0.103035
chr3	71728440	71803924	-	GXT_21915688	NM_173359	GXL_171103	EIF4E3	317649	6170	8	0.0222	0.45	up	1.45364	0.559238	0.284283
chr5	127593601	127873735	-	GXT_21915706	NM_001999	GXL_103171	FBN2	2201	10724	65	0	4.27	up	2.81417	-0.199023	1.52675
chr1	55013901	55074883	+	GXT_21915777	AK223570	GXL_47031	ACOT11	26027	1965	16	0.0833	0.45	up	1.10075	-0.714059	0.267469
chr14	105941200	105946477	+	GXT_21915964	AK223251	GXL_925062	CRIP2	1397	1114	8	1.58e-21	0.47	up	1.62597	-1.75083	-0.173737
chr15	41056266	41059906	+	GXT_21915981	AK223430	GXL_4895	GCHFR	2644	727	3	1.37e-11	1.59	up	1.58443	-0.926847	1.32299
chr15	83776388	83805898	+	GXT_21915985	AK223246	GXL_230379	TM6SF1	53346	1641	10	1.92e-17	1.82	up	2.06225	-0.543063	0.893109
chr16	3014445	3018384	+	GXT_21916008	AK223422	GXL_167456	KREMEN2	79412	1750	8	0.0303	1.52	up	1.43646	-0.118984	-0.381724
chr16	57406383	57417172	+	GXT_21916026	AK222692	GXL_98610	CX3CL1	6376	1520	3	0.107	1.96	up	2.83377	-0.168716	0.584463
chr19	12902296	12904106	+	GXT_21916113	AK222532	GXL_262474	JUNB	3726	1811	1	7.66e-11	0.42	up	1.02927	-0.309039	-0.0313999
chr19	8429039	8439252	+	GXT_21916115	AK222489	GXL_73860	ANGPTL4	51129	1870	7	2.62e-172	1.8	up	1.29162	-0.943652	0.791556
chr2	27310094	27322837	+	GXT_21916143	AK223075	GXL_42046	KHK	3795	1150	8	0.065	0.76	up	1.26655	-0.788418	0.144276
chr20	42295924	42344833	+	GXT_21916166	AK223482	GXL_132726	MYBL2	4605	2209	14	0.00016	0.4	up	1.27329	-0.543357	-0.241163
chr20	44746953	44758154	+	GXT_21916173	AK222896	GXL_132729	CD40	958	1339	9	0.000155	1.67	up	1.96476	0.069779	-0.185014
chr22	30792971	30818421	+	GXT_21916187	AK223587	GXL_825531	SEC14L2/MTFP1	-2	1372	12	1.48e-97	1.81	up	1.23386	-0.188681	0.49269
chr3	12421200	12475678	+	GXT_21916206	AK223528	GXL_193541	PPARG	5468	1473	6	2.59e-113	2.98	up	1.52267	-0.617674	0.526102
chr5	67586487	67593632	+	GXT_21916237	AK223613	GXL_5934	PIK3R1	5295	1638	10	4.37e-136	2.06	up	1.28082	-0.417596	0.757113
chr5	14581904	14610490	+	GXT_21916252	AK222731	GXL_744772	FAM105A	54491	1238	8	0.000366	3.51	up	1.30152	0.434958	-0.0278096
chr7	139478199	139720093	+	GXT_21916289	AK223466	GXL_316990	TBXAS1	6916	2185	17	4.43e-14	2.26	up	1.55343	-0.0852355	0.93972
chr11	8941623	8954525	-	GXT_21916473	AK223377	GXL_141026	C11orf16	56673	1897	7	0.776	2.01	up	1.00943	-0.367677	0.170731
chr12	71518877	71551565	-	GXT_21916532	AK223022	GXL_193932	TSPAN8	7103	1058	8	2.59e-25	2.86	up	1.56477	0.448525	0.857752
chr15	75012632	75017869	-	GXT_21916580	AK223113	GXL_189898	CYP1A1	1543	1851	7	1.4e-11	3.52	up	1.31399	0.455662	1.18322
chr15	75012678	75017869	-	GXT_21916582	AK223108	GXL_189898	CYP1A1	1543	1808	7	1.4e-11	3.52	up	1.31399	0.449511	1.1801
chr16	85711280	85722558	-	GXT_21916600	AK223123	GXL_167577	GINS2	51659	1150	5	3.22e-08	0.82	up	1.59414	-0.416735	0.189757
chr19	18893583	18902114	-	GXT_21916664	AK223216	GXL_184396	COMP	1311	2453	19	0	3.63	up	1.58588	-1.96013	0.755061
chr3	125822432	125899427	-	GXT_21916777	AK222535	GXL_181790	ALDH1L1	10840	3043	23	0.171	1.49	up	1.92365	-0.0241216	-0.228962
chr4	84216475	84256000	-	GXT_21916788	AK222986	GXL_925980	HPSE	10855	1719	12	8.61e-13	2.02	up	1.16348	0.20342	-0.408269
chr6	135239542	135271253	-	GXT_21916851	AK222848	GXL_190817	ALDH8A1	64577	1375	6	0.639	1.09	up	1.06755	0.280037	-1.60114
chr6	35543276	35656692	-	GXT_21916854	AK222807	GXL_694672	FKBP5	2289	1841	11	0	6.01	up	1.75876	-0.564889	1.72265
chr7	44258965	44365054	-	GXT_21916896	AK222703	GXL_12450	CAMK2B	816	1822	21	0.117	2	up	1.83181	-0.185587	-0.797418
chr8	22398358	22402215	-	GXT_22016134	AK125860	GXL_384202	LOC100507088	100507088	3858	1	0.133	0.44	up	1.89782	0.191353	0.403324
chr9	124577954	124580767	-	GXT_22016147	AK123875	GXL_384528	AK123875	0	2814	1	2.42e-47	1.94	up	1.0482	-0.866204	0.467272
chr1	113391442	113393265	-	GXT_22016171	AK093435	GXL_380118	FLJ36116	388666	1151	3	0.233	0.52	up	1.65318	-1.308	-0.685362
chr14	100762954	101142469	-	GXT_22016222	AK094455	GXL_381225	AK094455	0	1020	2	0.517	0.52	up	1.83181	-0.522464	-0.199394
chr3	75716700	75721241	-	GXT_22016329	AK095655	GXL_382948	LOC285300	285300	3042	3	1.22e-09	1.17	up	2.19094	-0.423509	-0.350953
chr3	46712062	46718899	-	GXT_22016336	AK092455	GXL_13724	ALS2CL	259173	1747	11	0.000163	0.66	up	2.30946	-1.06322	-1.53642
chr6	35687307	35703657	-	GXT_22016362	AK093304	GXL_694672	FKBP5	2289	2914	8	3.91e-06	3.91	up	1.3825	-2.11761	2.06389
chr19	9576989	9609279	-	GXT_22016480	AK056548	GXL_382063	ZNF560	147741	2844	10	0.00325	2.44	up	1.02809	0.166083	0.422677
chr19	16747526	16748902	-	GXT_22016483	AK021856	GXL_382089	AK021856	0	1377	1	0.0355	0.67	up	1.83181	-0.809005	-0.0641094
chr2	183789616	183821312	-	GXT_22016495	AK001291	GXL_241119	NCKAP1	10787	1725	9	5.71e-23	0.64	up	1.89782	0.301624	1.36104
chr1	39351968	39384855	-	GXT_22016589	AK000442	GXL_218309	RHBDL2	54933	1091	7	3.34e-06	0.96	up	1.3825	0.0774771	-0.150723
chr1	27938811	27961686	-	GXT_22016591	AK130188	GXL_218414	FGR	2268	2390	13	0.181	1.04	up	1.45943	-0.63294	0.169891
chr14	100757453	100772806	-	GXT_22016622	AK172788	GXL_101118	SLC25A29	123096	2316	4	2.12e-17	0.99	up	1.8762	-0.814033	0.442791
chr19	49654458	49657592	-	GXT_22016687	AK129876	GXL_189114	HRC	3270	1293	6	0.776	1.35	up	1.12748	-1.18497	-0.238775
chr5	36256898	36302002	-	GXT_22016733	AK058151	GXL_383385	RANBP3L	202151	1532	10	0.00077	2.2	up	1.8608	0.00626881	1.09607
chr1	113586000	113588357	+	GXT_22016792	AK125210	GXL_380120	AK125210	0	2358	1	0.829	1.22	up	1.89782	0.301016	-0.772279
chr10	78084158	78319925	+	GXT_22016805	AK125328	GXL_248809	C10orf11	83938	3045	2	1.08e-05	1.4	up	1.3825	-0.0246005	1.63543
chr12	40697753	40759584	+	GXT_22016818	AK131537	GXL_59636	LRRK2	120892	4529	23	8.79e-41	1.42	up	1.23183	0.316213	0.36781
chr17	73590554	73598250	+	GXT_22016853	AK126458	GXL_381901	MYO15B	80022	2835	4	0.647	0.5	up	1.12748	-0.501415	0.0461732
chr20	61584056	61599941	+	GXT_22016898	AK125597	GXL_81812	SLC17A9	63910	3106	13	1.42e-14	0.6	up	1.40039	-0.481151	-0.190718
chr3	42695176	42707643	+	GXT_22016910	AK127065	GXL_169712	ZBTB47	92999	3775	7	1.2e-43	0.87	up	1.4788	-0.324237	-0.166505
chr7	560028	564869	+	GXT_22016950	AK126475	GXL_926245	FLJ44511	441307	3506	3	0.354	0.72	up	2.50695	0.0597754	-0.71102
chr14	64924325	64926722	+	GXT_22017032	AK095514	GXL_247790	MTHFD1	4522	2398	1	0.000139	0.64	up	1.08595	0.0825679	1.22071
chr16	70802746	70807145	+	GXT_22017051	AK095020	GXL_381647	LOC100130894	100130894	1736	2	5.41e-12	1.74	up	1.0482	-0.483147	0.729625
chr9	133971924	133998530	+	GXT_22017158	AK091912	GXL_184925	AIF1L	83543	3344	6	0.504	0.61	up	1.83181	-0.337004	-0.272974
chr1	25879855	25895375	+	GXT_22017173	AK024397	GXL_59088	LDLRAP1	26119	4670	7	3.78e-10	0.44	up	1.89782	-0.827315	-0.624999
chr6	124125358	125146784	+	GXT_22017309	AK055326	GXL_383732	NKAIN2	154215	3024	7	3.99e-124	4.18	up	1.94294	0.468159	1.1855
chr1	25031406	25032715	+	GXT_22017353	AK098701	GXL_379978	AK098701	0	1310	1	0.639	1.54	up	1.0482	-1.25881	0.0573219
chr1	61869748	61923707	+	GXT_22017363	AK024964	GXL_779403	NFIA	4774	3164	5	1.07e-112	2.19	up	1.42745	-0.799828	1.64679
chr3	48601506	48632593	-	GXT_22018608	NM_000094	GXL_382925	COL7A1	1294	9143	118	0	2.47	up	2.65068	-0.863199	0.75702
chr19	9577031	9609279	-	GXT_22020113	NM_152476	GXL_382063	ZNF560	147741	2802	10	0.00325	2.44	up	1.02809	0.178332	0.423457
chr5	140011313	140013286	-	GXT_22020439	NM_001040021	GXL_103359	CD14	929	1548	3	9.07e-05	0.66	up	1.0285	-1.62979	-0.0837242
chr1	38076951	38100491	-	GXT_22021004	NM_001038633	GXL_218371	RSPO1	284654	2985	9	6.13e-120	7.12	up	4.73758	-0.29727	1.8798
chr14	100757453	100772860	-	GXT_22021361	NM_001039355	GXL_101118	SLC25A29	123096	2370	4	3.24e-17	1.01	up	1.97569	-0.830899	0.475816
chr14	75372346	75389145	-	GXT_22021362	NM_031464	GXL_101173	RPS6KL1	83694	3018	11	0.107	0.88	up	1.26512	-0.818738	-0.249917
chr3	141876369	141944449	-	GXT_22021870	NM_001039547	GXL_383013	GK5	256356	9837	16	0	2.23	up	1.13489	0.175912	1.5497
chr12	71518877	71551779	-	GXT_22022912	NM_004616	GXL_193932	TSPAN8	7103	1130	9	5.22e-14	2.75	up	2.09998	0.452386	0.879512
chr5	36249104	36302011	-	GXT_22023695	NM_145000	GXL_383385	RANBP3L	202151	2543	14	0.000743	1.62	up	1.85657	0.0570504	1.0733
chr2	227867427	228029275	-	GXT_22024967	NM_000092	GXL_382549	COL4A4	1286	10341	48	1.14e-127	2.93	up	1.87091	-0.00287687	0.0153845
chr1	54359861	54376759	+	GXT_22025811	NM_001039715	GXL_46970	DIO1	1733	1716	3	1	1.38	up	1.52267	-0.161312	-0.0926148
chr1	54359861	54376759	+	GXT_22025815	NM_001039716	GXL_46970	DIO1	1733	1660	3	1	1.38	up	1.52267	-0.16131	-0.0926268
chr18	7567314	8406859	+	GXT_22026463	NM_002845	GXL_381948	PTPRM	5797	5561	31	3.55e-14	0.49	up	1.04595	0.0756121	0.871903
chr19	708953	748330	+	GXT_22026549	NM_001040134	GXL_73776	PALM	5064	2742	8	2.24e-15	0.48	up	1.18082	-0.689853	-0.0356378
chr6	124125069	125146786	+	GXT_22027049	NM_001040214	GXL_383732	NKAIN2	154215	3315	7	2.68e-115	4.22	up	1.66296	0.46745	1.18559
chr17	1665259	1680859	+	GXT_22028063	NM_002615	GXL_381695	SERPINF1	5176	1533	8	1.79e-87	1.28	up	1.5611	-1.05665	0.480505
chr17	30593195	30651680	+	GXT_22029785	NM_138328	GXL_102467	RHBDL3	162494	4662	9	0.262	2.28	up	2.39681	-0.0926941	-0.283089
chr17	7942358	7952452	+	GXT_22029788	NM_001039130	GXL_45947	ALOX15B	247	2629	13	1.32e-33	3.17	up	2.29174	-0.552208	0.661784
chr17	7942358	7952452	+	GXT_22029791	NM_001039131	GXL_45947	ALOX15B	247	2494	12	4.05e-34	3.12	up	2.29174	-0.55212	0.661783
chr19	2476123	2478257	+	GXT_22029889	NM_015675	GXL_73885	GADD45B	4616	1375	4	0	1.55	up	1.31611	-0.896311	0.414704
chr22	18958027	18982141	+	GXT_22030040	NR_002733	GXL_925632	DGCR5	26220	5428	6	1	1.1	up	1.43646	-0.319827	-0.434242
chr15	83424697	83424823	+	GXT_22031171	NR_003011	GXL_381442	SCARNA15	677778	127	1	1	1.17	up	1.12955	0.750101	-1.80959
chr16	2017274	2018976	+	GXT_22031279	NM_174903	GXL_381494	RNF151	146310	786	3	0.776	1.21	up	1.31317	-0.329509	-1.16126
chr19	8429011	8439257	+	GXT_22031464	NM_001039667	GXL_73860	ANGPTL4	51129	1789	6	2.11e-194	1.79	up	1.28903	-0.94369	0.777572
chr9	35906189	35907138	+	GXT_22032252	NM_001039792	GXL_827205	HRCT1	646962	950	1	5.36e-48	1.78	up	1.80111	-0.414277	0.106796
chr1	145743260	145764207	+	GXT_22032456	NM_002614	GXL_744485	PDZK1	5174	2220	9	9.6e-11	3.16	up	1.18096	0.291296	1.14034
chr12	51318534	51326300	+	GXT_22032692	NM_014033	GXL_59476	METTL7A	25840	3390	2	5.16e-251	2.75	up	1.17529	-0.449406	1.54272
chr22	19701987	19710845	+	GXT_22033264	NM_002688	GXL_382759	GP1BB	2812	2072	12	2.5e-15	0.81	up	2.16387	-1.07346	0.241858
chr15	65488581	65503807	-	GXT_22214820	AK225926	GXL_189937	CILP	8483	2178	10	0.106	1.76	up	1.31317	-0.0782383	-0.998075
chr17	7163458	7164048	-	GXT_22214884	AK225418	GXL_252234	CLDN7	1366	486	2	3.88e-05	1.8	up	1.31399	-1.23882	0.283901
chr22	24615622	24641046	-	GXT_22215002	AK226019	GXL_249853	GGT5	2687	2334	11	0	5.38	up	3.98401	-1.19529	1.23934
chr22	50964181	50968444	-	GXT_22215010	AK225269	GXL_1229390	TYMP	1890	1604	10	2.69e-46	1.21	up	2.05376	-1.30678	0.0221355
chr22	19838502	19839671	-	GXT_22215012	AK225088	GXL_249688	GNB1L/C22orf29	-2	1170	1	2.1e-08	0.72	up	1.12418	-0.376435	0.413891
chr8	6365094	6420766	-	GXT_22215115	AK225698	GXL_29770	ANGPT2	285	2997	8	0.0533	1.66	up	1.10075	0.155067	0.43736
chr9	95177351	95186681	-	GXT_22215141	AK225922	GXL_190231	OMD	4958	1563	3	0	5.46	up	2.91739	-0.147262	2.18131
chr9	99264877	99381645	-	GXT_22215150	AK225361	GXL_695609	CDC14B	8555	2784	15	1.04e-07	0.72	up	1.04226	-0.00723093	0.366555
chr10	102821747	102825030	+	GXT_22215233	AK225949	GXL_134185	KAZALD1	81621	1445	5	2.07e-51	0.88	up	1.24528	-0.796444	0.407426
chr11	44587215	44641336	+	GXT_22215276	AK225410	GXL_170777	CD82	3732	1638	10	1.58e-104	1.67	up	1.4974	-1.24062	-0.125889
chr12	51318798	51324743	+	GXT_22215296	AK225689	GXL_59476	METTL7A	25840	1569	2	2.68e-176	2.81	up	1.20738	-0.467803	1.50891
chr12	51318799	51325868	+	GXT_22215299	AK225595	GXL_59476	METTL7A	25840	1582	3	1.93e-172	2.94	up	1.20738	-0.433766	1.51771
chr17	7284410	7293065	+	GXT_22215386	AK225403	GXL_45802	TNK1	8711	2763	13	0.316	1.04	up	1.12748	-0.134678	-0.27545
chr20	30640045	30689646	+	GXT_22215483	AK225819	GXL_132652	HCK	3055	2088	13	0	4.66	up	6.0186	-0.955868	0.469154
chr22	44576827	44602535	+	GXT_22215497	AK225929	GXL_47777	PARVG	64098	1600	15	0.568	1.2	up	1.59914	-0.967481	0.472797
chr5	148521177	148640002	+	GXT_22215563	AK225769	GXL_27402	ABLIM3	22885	4569	22	3.3e-171	1.97	up	1.27495	-0.759402	0.161261
chr6	25540274	25619974	+	GXT_22215604	AK225208	GXL_316936	LRRC16A	55604	1849	11	8.68e-11	0.8	up	1.59914	0.237408	-0.032059
chr8	57124358	57131083	+	GXT_22215630	AK225982	GXL_67161	CHCHD7	79145	1550	5	2.33e-21	0.91	up	1.05013	0.0522011	0.271414
chr1	208195587	208417665	-	GXT_22215692	NM_025179	GXL_481669	PLXNA2	5362	11444	32	0	3.3	up	1.56545	-0.977034	0.784999
chr1	29445937	29450421	-	GXT_22215762	NM_001003682	GXL_481354	TMEM200B	399474	2478	2	2.92e-07	0.48	up	1.02473	-0.646783	-0.159419
chr11	65142663	65150142	-	GXT_22215881	NM_001077241	GXL_41500	SLC25A45	283130	2230	6	9.35e-05	0.91	up	0.997825	-1.09135	-0.532986
chr13	113978505	114018463	-	GXT_22216014	NM_024719	GXL_40645	GRTP1	79774	1406	8	0.00268	1.41	up	3.24364	-0.295367	-0.204705
chr8	145637798	145641917	-	GXT_22216814	NM_017767	GXL_42401	SLC39A4	55630	2318	11	0.0182	0.56	up	1.43646	-1.34592	-0.000258683
chr1	27938800	27961727	-	GXT_22217059	NM_005248	GXL_218414	FGR	2268	2442	13	0.181	1.04	up	1.45943	-0.634573	0.146253
chr19	46272975	46285815	-	GXT_22217673	NM_001081560	GXL_481200	DMPK	1760	2851	15	5.07e-13	0.43	up	1.16681	-0.59298	-0.213719
chr3	48663156	48671279	-	GXT_22217839	NM_001040454	GXL_694083	SLC26A6	65010	2733	20	1.1e-219	2.54	up	1.75359	-1.3706	1.89114
chr4	84213614	84256306	-	GXT_22217931	NM_006665	GXL_925980	HPSE	10855	4652	13	3.01e-18	2.14	up	1.37023	0.213527	-0.401166
chr11	74165886	74178600	-	GXT_22218583	NM_005472	GXL_479688	KCNE3	10008	3070	3	0.207	0.87	up	1.28625	0.248556	0.383179
chr11	65142663	65150142	-	GXT_22218621	NM_182556	GXL_41500	SLC25A45	283130	2285	7	7.47e-05	0.92	up	0.997825	-1.09134	-0.532939
chr22	38480896	38506676	-	GXT_22219163	NM_025045	GXL_249668	BAIAP2L2	80115	2145	14	0.00613	0.66	up	1.34476	-0.116997	-0.536498
chr8	25701573	25902392	-	GXT_22219553	NM_022659	GXL_1237239	EBF2	64641	2297	16	2.89e-32	2.01	up	1.14076	-0.215673	0.24625
chr1	153516095	153518282	-	GXT_22219770	NM_019554	GXL_152575	S100A4	6275	564	4	2.82e-19	0.79	up	2.00814	-0.472059	0.181839
chr19	46272975	46285815	-	GXT_22220286	NM_004409	GXL_481200	DMPK	1760	2866	15	5.02e-13	0.43	up	1.16681	-0.592975	-0.213715
chr19	19375174	19384074	-	GXT_22220325	NM_001001524	GXL_824773	TM6SF2	53345	1483	10	1.75e-20	2.05	up	1.36283	-0.592685	0.463713
chr9	124217319	124262306	-	GXT_22220914	NR_003191	GXL_484064	GGTA1	2681	1755	7	0.551	0.97	up	1.18085	-0.0184078	-0.193105
chr11	44953899	44972608	-	GXT_22221156	NM_001076787	GXL_140993	TP53I11	9537	3648	8	4.41e-15	0.44	up	1.1666	-1.19739	0.0195816
chr17	41605211	41623762	-	GXT_22221398	NM_001079675	GXL_36916	ETV4	2118	2392	13	1.7e-67	2.45	up	1.43574	-1.118	0.463361
chr19	46272975	46285815	-	GXT_22221430	NM_001081562	GXL_481200	DMPK	1760	2847	15	3.17e-13	0.44	up	1.16681	-0.592971	-0.213712
chr1	53099066	53122737	+	GXT_22221989	NM_001042693	GXL_47020	FAM159A	348378	698	3	0.639	1.65	up	3.37102	-0.335069	1.37425
chr19	46001731	46005768	+	GXT_22222541	NM_001080401	GXL_262199	PPM1N	147699	1718	5	0.0775	1.63	up	1.1673	-0.193657	0.78871
chr20	44035228	44039250	+	GXT_22222683	NM_001048223	GXL_481814	DBNDD2	55861	1109	4	4.29e-56	1.13	up	1.19122	-0.551073	-0.0568739
chr20	44034655	44039250	+	GXT_22222684	NM_001048222	GXL_481814	DBNDD2	55861	1258	4	2.83e-55	1.13	up	1.14366	-0.548311	-0.0648684
chr20	44034655	44039250	+	GXT_22222692	NM_001048221	GXL_481814	DBNDD2	55861	1160	4	1.83e-56	1.15	up	1.14366	-0.548306	-0.064868
chr20	44035228	44039250	+	GXT_22222693	NM_001048224	GXL_481814	DBNDD2	55861	1207	4	6.66e-55	1.11	up	1.19122	-0.551056	-0.0569479
chr3	38524628	38534633	+	GXT_22222769	NM_001106	GXL_482437	ACVR2B	93	10006	1	0.008	0.85	up	1.42745	-0.0704907	0.510478
chr11	1855674	1858750	+	GXT_22223491	NM_138567	GXL_123160	SYT8	90019	1423	9	0.0029	2.83	up	1.52267	-1.10417	0.291139
chr15	83477973	83503613	+	GXT_22223651	NM_001080435	GXL_230391	WHAMM	123720	4261	10	1.24e-13	0.74	up	1.00383	0.474112	-0.352135
chr19	34972880	34992085	+	GXT_22223844	NM_001080436	GXL_262200	WTIP	126374	2204	8	6.07e-28	0.7	up	1.31047	-0.421672	-0.172549
chr2	137748462	138435287	+	GXT_22223902	NM_001080427	GXL_482238	THSD7B	80731	5847	27	5.78e-07	5.39	up	1.09672	0.366628	1.03382
chr2	241938255	242033643	+	GXT_22223925	NM_001080437	GXL_482379	SNED1	25992	6834	32	1.11e-58	0.85	up	2.51969	-0.718023	0.447837
chr2	24232953	24247145	+	GXT_22223972	NM_001080473	GXL_825610	FKBP1B/MFSD2B	-2	1508	13	8.72e-06	2.96	up	2.90398	-0.975523	1.61529
chr10	116853124	117708496	+	GXT_22224814	NM_207303	GXL_134139	ATRNL1	26033	8732	29	0.000121	1.37	up	1.05452	0.61281	0.207288
chr11	15136484	15268754	+	GXT_22224899	NM_001042536	GXL_479567	INSC	387755	2878	13	6.76e-137	2.87	up	1.55527	-0.418832	0.60412
chr15	57884102	57977562	+	GXT_22225066	NM_152451	GXL_4910	GRINL1A	81488	2314	12	0.374	0.8	up	1.15335	-0.0192358	0.0533631
chr21	46875424	46933634	+	GXT_22225454	NM_030582	GXL_176090	COL18A1	80781	5903	41	2.82e-06	0.41	up	1.18096	-0.720397	-0.308385
chr7	43152198	43602938	+	GXT_22225772	NM_015052	GXL_33586	HECW1	23072	6839	30	0.351	0.51	up	1.09078	0.415094	0.222328
chr9	127539437	127577161	+	GXT_22225914	NM_182487	GXL_184892	OLFML2A	169611	6542	8	0	4.47	up	3.15354	-1.96012	1.00474
chr1	64936476	65158741	+	GXT_22226106	NM_020925	GXL_46933	CACHD1	57685	5274	27	2.58e-39	1.11	up	1.0177	0.0216293	0.704306
chr22	51113070	51171641	+	GXT_22226804	NM_001080420	GXL_382869	SHANK3	85358	7145	23	0.0187	0.55	up	1.6078	-0.390152	-0.169572
chr3	12045862	12233532	+	GXT_22226868	NM_133625	GXL_193618	SYN2	6854	3317	14	7.23e-05	3.87	up	1.7857	0.605762	1.00103
chr3	12045862	12227226	+	GXT_22226872	NM_003178	GXL_193618	SYN2	6854	3884	12	3.81e-06	4.04	up	1.7857	0.631151	1.24525
chr1	110009100	110024764	+	GXT_22227354	NM_001040709	GXL_925438	SYPL2	284612	3779	6	1.05e-39	2.47	up	1.06268	0.238437	0.396267
chr15	76352299	76497304	+	GXT_22227583	NM_152335	GXL_230293	C15orf27	123591	2399	11	1.46e-16	6.35	up	2.06623	0.0483023	0.821401
chr17	21279699	21323179	+	GXT_22227665	NM_021012	GXL_744337	KCNJ12	3768	5230	3	0.00319	1.01	up	2.37976	-0.732873	-0.703776
chr19	4909510	4962165	+	GXT_22227721	NM_001048201	GXL_73897	UHRF1	29128	3900	17	1.52e-12	0.63	up	0.994881	-0.500663	0.187942
chr7	1272654	1276613	+	GXT_22228106	NM_001080461	GXL_483424	UNCX	340260	1596	3	0.228	0.98	up	1.6078	0.0726285	1.10483
chr10	135168795	135171529	-	GXT_22530940	NM_001098483	GXL_90555	C10orf125	282969	562	6	6.55e-06	1.22	up	3.96931	-0.453065	0.184608
chr14	52471520	52535946	-	GXT_22530958	NM_007361	GXL_664139	NID2	22795	5045	22	1.95e-127	1.36	up	1.2284	-0.279115	0.302402
chr20	32244893	32262264	-	GXT_22530986	NM_031231	GXL_122632	NECAB3	63941	1936	13	0.00963	0.43	up	1.09082	-0.90092	0.00643565
chr3	69219146	69435430	-	GXT_22531089	NM_015123	GXL_171078	FRMD4B	23150	5261	23	3.17e-173	2.64	up	1.04837	-0.956603	0.686966
chr7	1581871	1596066	-	GXT_22531108	NM_001097620	GXL_12400	TMEM184A	202915	6276	9	9.49e-05	0.44	up	1.69949	-0.664813	-0.0724168
chr11	2150342	2182439	-	GXT_22531150	NR_003512	GXL_479536	IGF2	3481	5136	7	0	5.35	up	1.7857	-1.17773	1.5955
chr16	1413206	1429684	-	GXT_22531168	NM_023076	GXL_75920	UNKL	64718	4124	6	1.09e-11	0.56	up	1.28157	-0.313536	0.0722992
chr2	220415450	220436268	-	GXT_22531285	NM_015311	GXL_89023	OBSL1	23363	6112	21	2.19e-48	0.7	up	1.39136	-0.599474	-0.0289056
chr4	84213614	84256034	-	GXT_22531310	NM_001098540	GXL_925980	HPSE	10855	4614	12	4.46e-18	2.14	up	1.16348	0.207287	-0.452965
chr9	117164360	117265495	-	GXT_22531345	NM_001083885	GXL_190046	DFNB31	25861	2889	12	1e-26	1.73	up	1.09078	-0.775694	1.0584
chr19	24344995	24346249	-	GXT_22531388	NR_003603	GXL_664220	LOC100101266	100101266	1255	1	0.603	0.95	up	1.3825	0.391616	-2.47083
chr16	2069521	2070756	+	GXT_22531456	NM_001099456	GXL_381495	NPW	283869	1016	2	0.00226	1.89	up	1.15311	-0.684668	0.243327
chr17	73584139	73622929	+	GXT_22531461	NR_003587	GXL_381901	MYO15B	80022	9407	61	0.0654	0.72	up	3.16471	-0.502714	-0.0574104
chr10	18429606	18830688	+	GXT_22531663	NM_201593	GXL_90449	CACNB2	783	3964	14	6.88e-11	2.74	up	4.29983	0.224934	0.885425
chr11	94822974	94865815	+	GXT_22531670	NM_015036	GXL_38947	ENDOD1	23052	4693	2	5.56e-54	0.77	up	1.08229	-0.416401	0.300378
chr1	162351520	162356608	+	GXT_22531785	NM_001085375	GXL_1227480	NOS1AP/C1orf226	-2	4126	2	0.000472	2.54	up	1.6078	-0.577752	0.90303
chr16	5008318	5069156	+	GXT_22531811	NM_014692	GXL_664168	SEC14L5	9717	6457	16	0.0711	2.94	up	1.74533	-0.0883447	-0.0421366
chr6	167525295	167552629	+	GXT_22531859	NM_004367	GXL_826675	CCR6	1235	3216	3	1	1.52	up	1.34647	0.0767882	0.120869
chr11	67183149	67193078	+	GXT_22531905	NM_020811	GXL_664114	CARNS1	57571	3942	9	0.279	0.61	up	2.16085	-1.1031	0.180803
chr1	53752753	53759891	-	GXT_22532129	AK076555	GXL_77625	LRP8	7804	2625	2	0.358	0.86	up	2.09484	-0.613181	0.230208
chr1	94668138	94686197	-	GXT_22532261	AK139908	GXL_664251	ARHGAP29	9411	1117	9	1.97e-19	1.23	up	1.42745	0.0792014	0.580248
chr15	83779151	83805434	+	GXT_22532314	AK136581	GXL_230379	TM6SF1	53346	1056	10	1.37e-13	2.47	up	1.09078	-0.337169	1.21964
chr15	40579899	40587247	-	GXT_22532351	AK031502	GXL_225488	PLCB2	5330	2760	15	0.355	0.67	up	1.09078	-0.756927	-0.253521
chr3	121150376	121186497	-	GXT_22532623	AK139505	GXL_316877	POLQ	10721	1711	7	0.0222	0.65	up	1.6379	0.443211	0.542883
chr17	48683284	48704775	+	GXT_22533133	AK142458	GXL_8620	CACNA1G	8913	3204	14	1.05e-06	4.73	up	1.67565	-0.546784	-0.084018
chr8	41394698	41399999	+	GXT_22533664	AK016667	GXL_42514	GINS4	84296	882	5	0.0145	0.68	up	2.91525	-0.286442	0.360094
chr8	30535627	30539492	-	GXT_22533666	AK151697	GXL_30002	GSR	2936	1740	3	4.94e-33	0.78	up	1.12748	-0.281748	-0.656574
chr22	35808607	35820705	+	GXT_22533728	AK088558	GXL_47755	MCM5	4174	1639	10	1.81e-39	0.9	up	1.18096	-0.73433	-0.0424856
chr19	18966820	18977404	+	GXT_22533947	AK052517	GXL_262479	UPF1	5976	2119	12	3.67e-13	0.49	up	2.16085	-0.436409	-0.0877728
chr19	49223853	49242366	-	GXT_22533983	AK033276	GXL_188975	RASIP1	54922	2421	10	0.000173	0.86	up	2.16085	-0.191998	0.744596
chr2	121978759	121983168	-	GXT_22534255	AK016570	GXL_241159	TFCP2L1	29842	3234	2	1.83e-06	4.71	up	1.12748	0.838892	1.44681
chr11	67812432	67818356	+	GXT_22534333	AK004094	GXL_1223353	TCIRG1	10312	1516	11	1.41e-16	0.5	up	2.09484	-1.17354	-0.266156
chr12	46752117	46757787	-	GXT_22534747	AK169378	GXL_139830	SLC38A2	54407	3433	6	1.17e-85	0.96	up	1.93682	-0.0235447	1.04444
chr12	46752117	46756891	-	GXT_22534748	AK033812	GXL_139830	SLC38A2	54407	3210	4	1.57e-97	0.97	up	1.9544	-0.126087	0.852445
chr12	40760741	40762014	+	GXT_22534770	AK050702	GXL_59636	LRRK2	120892	708	2	0.000279	1.3	up	1.50582	0.581019	0.390079
chr16	83992864	83999890	+	GXT_22534844	AK005892	GXL_89920	OSGIN1	29948	1644	4	6.05e-06	0.67	up	1.42745	-0.620036	0.180225
chr16	22337448	22345754	+	GXT_22534858	AK002918	GXL_98569	POLR3E	55718	1146	4	7.1e-11	0.82	up	2.09484	0.0528524	0.079265
chr14	75747281	75748930	+	GXT_22537043	XM_863070	GXL_172846	FOS	2353	1497	2	3.42e-88	2.29	up	1.03324	0.501145	0.238322
chr3	139279791	139353153	-	GXT_22537151	XM_534286	GXL_181831	NMNAT3	349565	918	5	0.776	0.84	up	1.1673	0.33297	0.130272
chr3	45764983	45785254	+	GXT_22537244	XM_859526	GXL_169770	SACM1L	22908	850	9	0.000334	0.49	up	2.16085	0.358677	-0.118024
chr20	3208105	3216489	-	GXT_22537252	XM_542919	GXL_122555	SLC4A11	83959	3001	19	1.87e-23	2.73	up	1.7857	-1.03313	0.348562
chr2	239147469	239149722	-	GXT_22538027	XM_843923	GXL_88986	HES6	55502	711	3	0.175	0.49	up	3.09888	-1.76182	-0.788804
chr2	48737809	48742266	+	GXT_22538039	XM_859696	GXL_42053	KLRAQ1	129285	627	3	1.5e-13	1.26	up	1.18085	-0.386292	1.90655
chr12	29659779	29938039	-	GXT_22538228	XM_543747	GXL_316625	TMTC1	83857	2591	19	0	3.27	up	2.29694	-0.748941	1.36916
chr12	121008976	121015349	+	GXT_22538307	XM_858372	GXL_103635	RNF10	9921	1293	4	9.35e-10	0.49	up	1.59914	-0.0678446	1.76997
chr16	31141934	31143091	+	GXT_22538372	XM_851853	GXL_98560	MYST1	84148	847	2	0.106	0.59	up	1.3825	-0.701109	-1.09059
chr1	15541275	15546972	+	GXT_22538578	XM_001148707	GXL_58949	TMEM51	55092	1803	2	0.0812	0.58	up	1.7857	-0.437029	0.494477
chr1	212859759	212872780	-	GXT_22538680	XM_530226	GXL_151280	BATF3	55509	737	3	0.607	0.7	up	1.10354	-0.076044	-1.23495
chr1	145440693	145442666	+	GXT_22538889	XM_001156510	GXL_228284	TXNIP	10628	1863	2	0	1.8	up	2.75458	-0.109291	1.18419
chr1	183904976	184007391	-	GXT_22538929	XM_524994	GXL_151144	GLT25D2	23127	5277	13	3.8e-27	1.12	up	1.4244	-0.318675	0.495835
chr15	29336527	29410510	+	GXT_22539140	XM_510630	GXL_4972	APBA2	321	3524	12	0.00176	0.61	up	2.09484	-0.244706	0.239225
chr14	100147700	100193638	+	GXT_22539206	XM_510158	GXL_172929	CYP46A1	10858	2661	19	0.456	0.68	up	1.59914	-0.212659	-0.282114
chr14	61789664	62017698	+	GXT_22539238	XM_001168342	GXL_247921	PRKCH	5583	2960	14	1.17e-29	2.14	up	2.40706	0.311586	0.388379
chr14	104394130	104519003	+	GXT_22539269	XM_510193	GXL_172784	TDRD9	122402	5163	39	0.224	0.45	up	1.18096	0.374124	0.654345
chr14	65412183	65425455	-	GXT_22539286	XM_522881	GXL_155961	RAB15	376267	4202	7	2.07e-11	0.87	up	1.7857	-0.344061	-0.127445
chr20	35491781	35522634	+	GXT_22539806	XM_525316	GXL_132664	C20orf118	140711	2704	11	8.03e-205	3.03	up	1.56673	-0.542684	-0.230263
chr6	3084930	3115419	+	GXT_22539965	XM_001161019	GXL_190757	RIPK1	8737	3727	6	3.7e-06	0.41	up	3.13217	0.00829116	0.68991
chr6	1389316	1395853	+	GXT_22540101	XM_001174677	GXL_190802	FOXF2	2295	2634	3	6.5e-08	0.54	up	1.94129	-1.37447	0.164085
chr17	1666129	1681140	+	GXT_22540236	XM_001154780	GXL_381695	SERPINF1	5176	1714	8	1.61e-88	1.27	up	1.83522	-1.11139	0.53726
chr9	125133892	125157982	+	GXT_22540554	XM_520238	GXL_184939	PTGS1	5742	5087	10	0	2.88	up	1.14859	-0.64081	0.3153
chr4	122682692	122706786	-	GXT_22541018	XM_001143755	GXL_220943	TMEM155	132332	1010	8	0.623	0.62	up	1.42745	0.386361	0.58365
chr4	3468642	3502552	+	GXT_22541106	XM_001174613	GXL_164651	DOK7	285489	3243	17	0.00596	1.28	up	1.7857	-0.752608	-0.75205
chr18	52569979	52626505	-	GXT_22541155	XM_001135460	GXL_70904	CCDC68	80323	2805	12	0	4.61	up	1.95823	-0.176726	0.696659
chr8	143762584	143764149	+	GXT_22541354	XM_001149253	GXL_67344	PSCA	8000	1077	2	0.0116	0.71	up	2.30946	-1.4903	0.3221
chr22	43014816	43080945	-	GXT_22541406	XM_001171043	GXL_75083	CYB5R3	1727	2097	10	1.76e-14	0.45	up	1.6078	-0.658688	0.226221
chr22	24620964	24621610	-	GXT_22541421	XM_001157546	GXL_249853	GGT5	2687	375	3	0	5.19	up	1.15311	-1.54933	1.23245
chr22	38480890	38507320	-	GXT_22541490	XM_001147630	GXL_249668	BAIAP2L2	80115	2422	16	0.00613	0.66	up	1.15311	-0.13236	-0.525297
chr5	175603527	175618318	-	GXT_22541681	XM_530873	GXL_483133	ENSG00000248596	0	782	6	0.247	1.74	up	1.15311	-0.929293	0.96047
chr5	167699247	167896836	+	GXT_22541694	XM_527107	GXL_27477	WWC1	23286	4708	26	0.14	0.6	up	2.45831	-0.37433	-0.422679
chr19	47843744	47845332	+	GXT_22541912	XM_001168864	GXL_262160	GPR77	27202	1413	2	0	4.52	up	1.01716	-1.09471	2.00563
chr19	38702418	38718709	-	GXT_22542003	XM_001162157	GXL_184333	DPF1	8193	1231	10	0.000147	1.36	up	1.50582	-0.70062	0.0337395
chr19	58856546	58867596	-	GXT_22542029	XM_001146534	GXL_73774	A1BG/ZNF497	-2	3425	8	0.0271	0.47	up	1.7857	-0.41774	-0.24294
chr2	3501633	3504766	-	GXT_22542268	XM_001153173	GXL_75721	ADI1	55256	1394	2	4.32e-24	0.57	up	1.69949	-0.371351	1.24362
chr2	11319914	11485541	-	GXT_22542315	XM_525689	GXL_75618	ROCK2	9475	8499	36	1.13e-13	0.47	up	1.26068	0.43914	0.142747
chr11	61538191	61555990	+	GXT_22542476	XR_020203	GXL_170761	C11orf9	745	4933	23	1	0.43	up	1.7857	-0.937677	-0.1564
chr7	64350245	64391953	+	GXT_22542863	XM_527768	GXL_1236360	ZNF273	10793	4505	5	0.101	0.55	up	3.13217	0.143869	0.309478
chr16	2075482	2089027	+	GXT_22543264	XR_022391	GXL_167602	SLC9A3R2	9351	2176	10	8.91e-126	1.22	up	1.84835	-1.50653	0.340495
chr16	67676024	67691421	+	GXT_22543391	XM_523395	GXL_316725	RLTPR	146206	4545	36	0.696	0.42	up	1.18096	-0.36147	-0.256171
chr3	127325450	127340812	+	GXT_22544028	NM_173257	GXL_119246	MCM2	4171	2020	11	3.74e-12	0.62	up	1.42745	-0.418661	-0.199648
chr3	33192718	33261266	-	GXT_22544868	XM_001098156	GXL_664300	SUSD5	26032	4060	6	2.63e-05	0.42	up	1.27372	0.0380343	0.712172
chr20	30661816	30674749	+	GXT_22546607	NM_001037141	GXL_132652	HCK	3055	929	6	7.57e-123	4.5	up	1.12748	-1.43814	0.800715
chr17	3576524	3599583	-	GXT_22734550	ENST00000345901	GXL_1225460	P2RX5	5026	2116	11	7.71e-130	3.27	up	1.02809	-0.720411	0.198471
chr17	7162666	7165796	-	GXT_22734635	ENST00000360325	GXL_252234	CLDN7	1366	2097	4	8.25e-05	0.6	up	1.38665	-1.31945	0.141981
chr17	19641300	19646688	-	GXT_22734796	ENST00000333946	GXL_252129	ALDH3A1	218	1947	8	1.09e-08	1.64	up	2.45831	-1.02777	1.32856
chr17	27051471	27053950	-	GXT_22734843	ENST00000394933	GXL_36814	TLCD1	116238	784	4	0.0211	0.56	up	1.01784	-0.000361646	0.283619
chr18	32948435	32957301	-	GXT_22735356	ENST00000399057	GXL_70947	ZNF396	252884	1884	4	9.44e-05	1.38	up	1.00383	-0.805759	-0.698593
chr19	463344	474983	-	GXT_22735507	ENST00000382696	GXL_382032	ODF3L2	284451	1498	3	2.7e-06	2.56	up	1.47817	-1.05013	0.236757
chr19	812518	821952	-	GXT_22735514	ENST00000300947	GXL_3356	LPPR3	79948	2277	8	0.0245	2.48	up	2.953	-1.09622	-0.531538
chr19	8388282	8408146	-	GXT_22735706	ENST00000359768	GXL_3462	KANK3	256949	2589	11	0.389	2.79	up	2.953	-0.288287	0.394621
chr19	11435094	11450321	-	GXT_22735771	ENST00000222120	GXL_3562	RAB3D	9545	1878	5	2.44e-11	1.63	up	2.23208	-1.09231	0.7502
chr19	19375473	19384074	-	GXT_22735966	ENST00000269990	GXL_824773	TM6SF2	53345	1106	11	4.4e-09	1.94	up	1.36283	-0.626752	0.452404
chr19	38741877	38747231	-	GXT_22736099	ENST00000347262	GXL_184421	PPP1R14A	94274	696	3	0	3.82	up	5.12045	-2.45444	1.08103
chr19	46272978	46285736	-	GXT_22736288	ENST00000342805	GXL_481200	DMPK	1760	2736	16	4.01e-13	0.43	up	1.19634	-0.573804	-0.193175
chr19	49654458	49657591	-	GXT_22736382	ENST00000391863	GXL_189114	HRC	3270	1260	7	1	0.85	up	1.12748	-1.18486	-0.238836
chr19	54972981	54974894	-	GXT_22736589	ENST00000333834	GXL_73787	LENG9	94059	1914	1	0.000593	0.44	up	1.3519	-2.11085	0.19888
chr20	3648617	3662893	-	GXT_22736775	ENST00000356518	GXL_122541	ADAM33	80332	3677	22	0.0351	0.76	up	3.09665	-0.858386	-1.04482
chr20	3648631	3662656	-	GXT_22736777	ENST00000360630	GXL_122541	ADAM33	80332	2619	16	0.194	0.57	up	3.12422	-0.866177	-1.02883
chr20	23614294	23619110	-	GXT_22736893	ENST00000398409	GXL_122664	CST3	1471	832	4	2.28e-58	0.76	up	1.1028	-0.591147	0.521828
chr20	35518632	35580246	-	GXT_22737047	ENST00000262878	GXL_122630	SAMHD1	25939	4784	16	0	3.08	up	1.80326	-0.685871	2.56384
chr20	43380449	43438979	-	GXT_22737104	ENST00000372851	GXL_825326	RIMS4	140730	5203	6	1.94e-44	3.4	up	1.31317	0.102955	1.07882
chr20	47984946	48099184	-	GXT_22737215	ENST00000371741	GXL_128461	KCNB1	3745	7318	2	4.79e-63	3.54	up	4.00569	-0.723163	0.946552
chr20	56227093	56266886	-	GXT_22737295	ENST00000395814	GXL_128240	PMEPA1	56937	800	4	3.12e-38	0.98	up	1.12748	-0.794509	-0.194957
chr20	60920470	60942326	-	GXT_22737328	ENST00000370677	GXL_128313	LAMA5	3911	1674	12	4.68e-05	1.61	up	2.09484	-1.25512	-0.916159
chr20	62375019	62462567	-	GXT_22737389	ENST00000245663	GXL_128315	ZBTB46	140685	5190	5	0.162	0.57	up	1.09672	-0.280584	-0.249404
chr21	45642874	45660723	-	GXT_22737663	ENST00000344330	GXL_163641	ICOSLG	23308	1009	7	1	1.17	up	1.56358	-0.249246	-0.484207
chr21	45917777	46131495	-	GXT_22737668	ENST00000380116	GXL_163681	TSPEAR	54084	3969	12	0.117	2.28	up	1.15311	-0.0746123	-0.312784
chr22	19770747	19842462	-	GXT_22737786	ENST00000329517	GXL_249688	GNB1L/C22orf29	-2	6706	8	0.00683	0.5	up	0.992548	-0.90405	0.255583
chr22	20779105	20792146	-	GXT_22737805	ENST00000266214	GXL_825486	KLHL22/SCARF2	-2	3278	11	7.98e-23	0.51	up	1.16213	-0.504333	-0.0590625
chr22	20779665	20792146	-	GXT_22737806	ENST00000341328	GXL_825486	KLHL22/SCARF2	-2	2703	11	4.34e-17	0.52	up	1.16213	-0.529892	-0.0633219
chr22	24178921	24181191	-	GXT_22737849	ENST00000318109	GXL_249718	DERL3	91319	860	7	0.00748	1.98	up	2.09484	-0.774316	-0.138339
chr22	24615628	24641027	-	GXT_22737858	ENST00000398292	GXL_249853	GGT5	2687	2408	12	0	5.37	up	3.98401	-1.21031	1.23888
chr22	32014477	32024207	-	GXT_22737940	ENST00000382151	GXL_825539	PISD	23761	2669	8	2.45e-82	1.38	up	1.12955	-0.998853	0.528605
chr22	32014600	32026817	-	GXT_22737942	ENST00000397500	GXL_825539	PISD	23761	2194	7	4.64e-95	1.37	up	1.3807	-0.931273	0.520576
chr22	32015089	32021801	-	GXT_22737945	ENST00000397503	GXL_825539	PISD	23761	1637	7	1.34e-130	1.36	up	1.12748	-0.963444	0.755112
chr22	32015089	32021801	-	GXT_22737946	ENST00000397502	GXL_825539	PISD	23761	1476	6	6.23e-157	1.36	up	1.12748	-0.963451	0.75511
chr22	50702144	50708822	-	GXT_22738180	ENST00000395764	GXL_75102	MAPK11	5600	1512	13	0.00332	0.54	up	1.37984	-1.53757	0.0108708
chr12	6456015	6484715	-	GXT_22738366	ENST00000228916	GXL_139760	SCNN1A	6337	3134	13	1.99e-25	4.11	up	1.67565	-0.723006	0.574442
chr12	6457893	6484390	-	GXT_22738367	ENST00000358945	GXL_139760	SCNN1A	6337	2137	12	5.18e-17	5.83	up	1.67565	-0.702897	0.585563
chr12	6456015	6484390	-	GXT_22738369	ENST00000338748	GXL_139760	SCNN1A	6337	3285	11	2.37e-26	4.06	up	1.67565	-0.726002	0.582025
chr12	15034827	15038828	-	GXT_22738507	ENST00000228938	GXL_139911	MGP	4256	661	4	7.12e-247	2.6	up	1.59402	0.50568	0.578642
chr12	15260718	15374304	-	GXT_22738510	ENST00000256953	GXL_139848	RERG	85004	2216	5	0	6.68	up	1.97068	0.213801	1.55598
chr12	29689064	29937692	-	GXT_22738569	ENST00000381224	GXL_316625	TMTC1	83857	2199	13	0	3.25	up	2.50974	-0.778185	1.40892
chr12	54789049	54813050	-	GXT_22738768	ENST00000293379	GXL_193957	ITGA5	3678	4246	30	8.79e-92	1.05	up	1.18354	-0.503007	0.0154007
chr12	56229244	56232320	-	GXT_22738792	ENST00000394182	GXL_193786	MMP19	4327	2245	4	6.74e-55	1.18	up	1.15311	-0.66361	0.945118
chr12	56843884	56848429	-	GXT_22738813	ENST00000257979	GXL_193765	MIP	4284	2004	4	0.639	0.93	up	1.67565	-0.118068	0.94287
chr12	69244960	69326664	-	GXT_22738890	ENST00000338356	GXL_193797	CPM	1368	6636	8	0	6.7	up	2.12823	-0.703591	2.18512
chr12	71518869	71835678	-	GXT_22738905	ENST00000393330	GXL_193932	TSPAN8	7103	1512	12	3.68e-25	2.82	up	1.12955	0.264263	-0.258673
chr13	48985274	49018840	-	GXT_22739246	ENST00000378434	GXL_159039	LPAR6	10161	2911	7	8.34e-19	1.14	up	1.6078	-0.0755496	0.94657
chr13	77454312	77460525	-	GXT_22739324	ENST00000377474	GXL_159071	KCTD12	115207	6214	1	3.68e-90	0.98	up	1.33707	-0.368647	0.153716
chr13	99445741	99738660	-	GXT_22739366	ENST00000357329	GXL_159092	DOCK9	23348	7526	55	1.03e-62	1.12	up	2.04746	-0.0596288	0.585766
chr13	99445741	99738660	-	GXT_22739367	ENST00000376455	GXL_159092	DOCK9	23348	7502	55	1.48e-62	1.12	up	2.04746	-0.0596356	0.585752
chr13	99446880	99738660	-	GXT_22739368	ENST00000339416	GXL_159092	DOCK9	23348	6337	54	3.88e-79	1.07	up	2.04746	-0.0635355	0.584746
chr14	24037266	24046666	-	GXT_22739561	ENST00000267407	GXL_155899	AP1G2/JPH4	-2	3468	5	1	0.49	up	1.15311	-0.0847186	-0.149761
chr14	52471521	52535712	-	GXT_22739708	ENST00000216286	GXL_664139	NID2	22795	4810	22	8.93e-130	1.36	up	1.35357	-0.270874	0.27846
chr14	52471521	52535946	-	GXT_22739709	ENST00000316204	GXL_664139	NID2	22795	3828	18	1.32e-205	1.36	up	1.2284	-0.279153	0.302406
chr14	52480888	52536545	-	GXT_22739710	ENST00000395707	GXL_664139	NID2	22795	3544	17	6.61e-233	1.31	up	1.13056	-0.338462	0.230946
chr14	60062695	60337684	-	GXT_22739753	ENST00000267484	GXL_155893	RTN1	6252	3435	9	4.71e-36	5.96	up	1.03375	0.771117	1.6091
chr14	65215673	65230557	-	GXT_22739783	ENST00000342835	GXL_316660	SPTB	6710	1074	5	0.639	1.48	up	1.06755	-0.186936	-1.21848
chr14	75320851	75330537	-	GXT_22739853	ENST00000238583	GXL_101114	PROX2	283571	1110	3	0.517	1.06	up	2.09484	0.327702	0.277257
chr15	26791467	27018924	-	GXT_22740135	ENST00000299267	GXL_779241	GABRB3	2562	2948	9	0.715	0.49	up	1.18096	0.0630969	0.266111
chr15	40580100	40600174	-	GXT_22740202	ENST00000389812	GXL_225488	PLCB2	5330	3219	21	0.439	0.52	up	1.01716	-0.521878	-0.217458
chr15	75011883	75017951	-	GXT_22740494	ENST00000379727	GXL_189898	CYP1A1	1543	2685	7	1.31e-10	3.04	up	1.31399	0.420956	0.715297
chr15	79051546	79103773	-	GXT_22740535	ENST00000258883	GXL_189727	ADAMTS7	11173	5498	24	2.08e-158	1.08	up	1.67764	-0.340721	0.49311
chr15	79214092	79237323	-	GXT_22740537	ENST00000394758	GXL_189819	CTSH	1512	1354	13	0.485	0.44	up	1.88736	-0.270626	-0.862129
chr15	90291892	90294541	-	GXT_22740606	ENST00000300057	GXL_189969	MESP1	55897	2369	2	0.308	0.51	up	1.50735	-0.830459	0.27363
chr15	100511794	100882210	-	GXT_22740639	ENST00000268070	GXL_189799	ADAMTS17	170691	6207	22	0.834	0.44	up	1.18085	-0.196435	-1.03466
chr15	101844134	102029873	-	GXT_22740652	ENST00000348070	GXL_4945	PCSK6	5046	4237	22	1.09e-10	2.86	up	1.01716	0.191059	-0.415585
chr15	101844134	102029873	-	GXT_22740653	ENST00000358417	GXL_4945	PCSK6	5046	4198	21	1.09e-10	2.86	up	1.01716	0.191053	-0.415582
chr15	101886947	102029873	-	GXT_22740655	ENST00000344273	GXL_4945	PCSK6	5046	2938	15	2.55e-05	2.88	up	1.01716	0.195047	-0.49097
chr16	1413206	1429646	-	GXT_22740719	ENST00000248104	GXL_75920	UNKL	64718	4282	6	1.06e-11	0.56	up	1.28157	-0.336768	0.084252
chr16	3292028	3306627	-	GXT_22740792	ENST00000339854	GXL_75973	MEFV	4210	2866	9	0.000202	3.72	up	2.953	-0.0772548	0.589018
chr16	68021296	68027167	-	GXT_22741185	ENST00000268795	GXL_133516	DPEP2	64174	1626	10	1	1.23	up	1.18096	-0.928558	0.734499
chr16	68021296	68027115	-	GXT_22741186	ENST00000322384	GXL_133516	DPEP2	64174	1313	9	1	1.23	up	1.18096	-0.921788	0.753571
chr16	85709804	85722605	-	GXT_22741302	ENST00000253462	GXL_167577	GINS2	51659	2673	5	7.41e-08	0.78	up	1.59414	-0.437235	0.0746925
chr17	56597616	56606663	-	GXT_22741448	ENST00000317268	GXL_35918	2004-09-01	5414	1736	12	0.0051	1.95	up	1.12955	-0.329794	0.620443
chr17	56597616	56604340	-	GXT_22741449	ENST00000393086	GXL_35918	2004-09-01	5414	1549	11	0.0051	1.95	up	2.70479	-0.71926	0.616352
chr17	61909441	61919929	-	GXT_22741492	ENST00000225742	GXL_35870	SMARCD2	6603	2287	14	4.41e-39	0.84	up	1.13862	-1.19975	1.60706
chr10	3185896	3202497	-	GXT_22741773	ENST00000380978	GXL_227984	PITRM1	10531	1788	16	8.01e-20	0.58	up	1.15311	-0.301138	0.0610229
chr10	99624758	99790585	-	GXT_22742520	ENST00000298819	GXL_197100	CRTAC1	55118	2846	14	0.776	2.01	up	1.01716	0.162529	-0.023458
chr11	626431	627143	-	GXT_22742869	ENST00000176195	GXL_141065	SCT	6343	366	4	0.311	1.13	up	1.15311	-0.820537	-0.376409
chr11	2150342	2158520	-	GXT_22742901	ENST00000381395	GXL_479536	IGF2	3481	4527	4	0	5.34	up	3.64994	-3.58669	2.72652
chr11	2153870	2158517	-	GXT_22742904	ENST00000381392	GXL_479536	IGF2	3481	1006	4	0	5.14	up	3.64481	-3.58488	3.10107
chr11	2153903	2162246	-	GXT_22742905	ENST00000381389	GXL_479536	IGF2	3481	1023	4	0	5.19	up	4.0586	-3.52657	2.11077
chr11	3109231	3186582	-	GXT_22742934	ENST00000348039	GXL_141014	OSBPL5	114879	2799	21	4.21e-223	1.57	up	1.48778	-0.920499	0.964225
chr11	3109451	3186582	-	GXT_22742937	ENST00000357352	GXL_141014	OSBPL5	114879	2622	21	4.8e-256	1.57	up	1.48778	-0.924317	0.96959
chr11	9041938	9113148	-	GXT_22743076	ENST00000309263	GXL_141071	SCUBE2	57758	3727	22	0.265	0.43	up	1.45583	-0.0412505	-0.504078
chr11	16809207	16813275	-	GXT_22743112	ENST00000332954	GXL_1222889	PLEKHA7	144100	2192	5	2.85e-16	1.54	up	1.6379	-0.745348	-0.216475
chr11	65142663	65150142	-	GXT_22743485	ENST00000377152	GXL_41500	SLC25A45	283130	2099	6	0.000141	0.96	up	0.997825	-1.09136	-0.532915
chr11	65143665	65150142	-	GXT_22743486	ENST00000332723	GXL_41500	SLC25A45	283130	1212	6	0.00124	1.09	up	0.997825	-1.03975	-0.475724
chr11	66129993	66139291	-	GXT_22743517	ENST00000311161	GXL_41635	SLC29A2	3177	2380	11	0.621	0.42	up	1.22092	-0.92966	-0.332703
chr11	70335118	70507872	-	GXT_22743578	ENST00000357171	GXL_691537	SHANK2	22941	2051	7	0.0171	1.24	up	1.41008	-0.887851	-0.293772
chr11	74165886	74178673	-	GXT_22743620	ENST00000310128	GXL_479688	KCNE3	10008	3143	3	0.207	0.87	up	1.27329	0.234327	0.383503
chr11	74976643	75062749	-	GXT_22743633	ENST00000360025	GXL_1223408	ARRB1	408	1895	15	0.00143	0.56	up	1.08126	-0.607284	-0.0932808
chr11	94915322	94964246	-	GXT_22743717	ENST00000393234	GXL_161376	SESN3	143686	1176	7	2.45e-15	1.59	up	0.992529	0.369357	0.873725
chr11	101323686	101454234	-	GXT_22743730	ENST00000360497	GXL_161186	TRPC6	7225	2631	12	3.47e-22	2.85	up	3.25382	0.323185	0.72515
chr11	101323686	101454234	-	GXT_22743731	ENST00000348423	GXL_161186	TRPC6	7225	2448	11	8.99e-22	2.72	up	3.25382	0.32315	0.725156
chr12	123637080	123706441	-	GXT_22744139	ENST00000302349	GXL_66181	MPHOSPH9	10198	3194	20	0.000935	0.51	up	1.15311	0.122024	0.615969
chr8	6357172	6420930	-	GXT_22744200	ENST00000325203	GXL_29770	ANGPT2	285	5416	9	0.267	0.54	up	1.33862	0.157459	0.461191
chr8	6360601	6420565	-	GXT_22744201	ENST00000338312	GXL_29770	ANGPT2	285	1466	8	0.116	1.67	up	1.06301	0.162809	0.442399
chr8	21971928	21989381	-	GXT_22744311	ENST00000381418	GXL_29825	HR	55806	6335	19	1.65e-46	2.06	up	2.20015	-1.66717	0.34045
chr9	19056616	19093211	-	GXT_22744426	ENST00000380496	GXL_31705	HAUS6	54801	3756	13	1.04e-08	0.85	up	1.15311	0.319076	0.77695
chr9	84215004	84303596	-	GXT_22744787	ENST00000376472	GXL_31888	TLE1	7088	1800	15	0.0118	0.55	up	1.0717	-0.642759	0.0911171
chr9	88951794	88958038	-	GXT_22744844	ENST00000375948	GXL_190092	ZCCHC6	79670	958	5	0.0879	0.56	up	1.42745	0.525941	0.0436105
chr9	94325373	94711162	-	GXT_22744869	ENST00000375715	GXL_190074	ROR2	4920	2993	13	1.31e-13	2.41	up	2.78615	0.00363071	0.510668
chr9	95176527	95186743	-	GXT_22744885	ENST00000375550	GXL_190231	OMD	4958	2449	3	0	5.55	up	2.81257	-0.101843	2.18896
chr9	95218487	95244788	-	GXT_22744886	ENST00000375543	GXL_190069	ASPN	54829	2237	6	5.67e-76	3.95	up	1.5313	0.300272	0.109609
chr9	95218487	95244788	-	GXT_22744887	ENST00000375544	GXL_190069	ASPN	54829	2470	8	5.72e-65	4	up	1.5313	0.300259	0.109609
chr9	95227201	95244788	-	GXT_22744888	ENST00000395538	GXL_190069	ASPN	54829	956	5	6.04e-37	4.53	up	1.5313	0.311201	0.361438
chr9	99258569	99382112	-	GXT_22744931	ENST00000265659	GXL_695609	CDC14B	8555	1868	13	0.0421	0.47	up	1.05744	0.0104726	0.320507
chr9	99264868	99381660	-	GXT_22744932	ENST00000375240	GXL_695609	CDC14B	8555	2547	13	1.38e-06	0.7	up	1.03335	-0.00708164	0.367992
chr9	99277960	99382112	-	GXT_22744936	ENST00000375236	GXL_695609	CDC14B	8555	1910	13	0.0306	0.49	up	1.05744	0.0262465	0.378184
chr9	111934255	112083244	-	GXT_22745017	ENST00000374566	GXL_190101	EPB41L4B	54566	5800	26	2.98e-14	1.26	up	1.38147	-0.629407	-0.0681814
chr9	112002174	112083244	-	GXT_22745018	ENST00000374557	GXL_190101	EPB41L4B	54566	3843	16	1.73e-31	1.07	up	1.38147	-0.914257	0.124451
chr9	123664671	123691047	-	GXT_22745141	ENST00000373887	GXL_190039	TRAF1	7185	6324	8	4.16e-05	0.47	up	1.00545	-1.0129	1.34899
chr9	134452158	134585229	-	GXT_22745318	ENST00000372191	GXL_12651	RAPGEF1	2889	6592	26	1.02e-47	0.67	up	1.7857	-0.606618	0.325496
chr9	140342022	140351989	-	GXT_22745473	ENST00000339554	GXL_12690	NELF	26012	2914	13	2.69e-203	2.07	up	3.67107	-1.54458	1.36076
chr9	140342677	140349108	-	GXT_22745474	ENST00000371482	GXL_12690	NELF	26012	2888	9	7.83e-193	2.05	up	1.6078	-0.957956	1.48944
chr9	140342677	140353771	-	GXT_22745479	ENST00000371473	GXL_12690	NELF	26012	2889	14	0	2.06	up	3.26933	-1.62072	1.73743
chr9	140346917	140348944	-	GXT_22745481	ENST00000371468	GXL_12690	NELF	26012	672	4	2.06e-121	2.28	up	1.7857	-1.69615	2.01586
chr6	36708555	36807778	-	GXT_22746294	ENST00000244751	GXL_39999	CPNE5	57699	3897	21	0.885	0.45	up	1.88736	-0.436249	-0.286892
chr6	41651718	41703346	-	GXT_22746351	ENST00000373033	GXL_40059	TFEB	7942	2331	9	7.04e-05	0.69	up	1.96102	-1.03986	-0.163164
chr6	41902694	42016706	-	GXT_22746367	ENST00000372988	GXL_40110	CCND3	896	2133	5	4.5e-63	1.13	up	3.21009	-1.2958	0.782113
chr6	43418090	43423328	-	GXT_22746397	ENST00000372485	GXL_39982	DLK2	65989	1572	6	0.521	0.56	up	1.30152	-0.402414	0.217535
chr6	43418090	43423786	-	GXT_22746398	ENST00000372496	GXL_39982	DLK2	65989	1325	6	0.179	1.03	up	1.80111	-0.404951	-0.642208
chr6	46128152	46138708	-	GXT_22746438	ENST00000230565	GXL_40193	ENPP5	59084	2544	4	2.11e-23	2.92	up	2.83451	0.774697	1.18962
chr6	117609463	117747018	-	GXT_22746797	ENST00000368508	GXL_1235508	ROS1/GOPC	-2	7436	43	8.7e-189	3.56	up	1.36283	0.492179	0.473569
chr6	117609463	117747018	-	GXT_22746798	ENST00000368507	GXL_1235508	ROS1/GOPC	-2	7418	44	1.31e-188	3.54	up	1.36283	0.492168	0.473602
chr7	5520213	5540579	-	GXT_22746889	ENST00000297035	GXL_694815	FBXL18	80028	2030	3	0.00231	0.45	up	1.7857	-0.97361	0.239205
chr7	44183870	44197713	-	GXT_22747097	ENST00000358258	GXL_12533	GCK	2645	2260	10	0.569	1.8	up	1.18096	-0.38002	0.14024
chr7	44256755	44365097	-	GXT_22747099	ENST00000395749	GXL_12450	CAMK2B	816	4447	24	0.011	2.05	up	1.7857	-0.190785	-0.800802
chr7	44259029	44365023	-	GXT_22747104	ENST00000347193	GXL_12450	CAMK2B	816	1577	20	0.117	2	up	2.09484	-0.185048	-0.796077
chr7	44259029	44365023	-	GXT_22747106	ENST00000346990	GXL_12450	CAMK2B	816	1448	16	0.117	2	up	2.09484	-0.185057	-0.796105
chr7	75162621	75368265	-	GXT_22747248	ENST00000336926	GXL_97794	HIP1	3092	8013	31	0	2.13	up	1.45161	-0.553252	0.273722
chr7	107788107	108096783	-	GXT_22747489	ENST00000351718	GXL_182395	NRCAM	4897	6228	28	3.66e-84	2.65	up	2.72834	0.515849	0.90362
chr8	27727399	27850244	-	GXT_22747769	ENST00000354914	GXL_29820	SCARA5	286133	4026	9	0.19	0.47	up	1.85482	-0.0311945	1.35419
chr8	29190581	29208185	-	GXT_22747779	ENST00000240100	GXL_29907	DUSP4	1846	5537	4	0	3.02	up	1.74213	-0.926297	0.513088
chr8	29194056	29206322	-	GXT_22747780	ENST00000240101	GXL_29907	DUSP4	1846	2959	5	2.89e-98	2.83	up	3.27782	-0.747731	0.298731
chr8	37716136	37756985	-	GXT_22747798	ENST00000287263	GXL_29795	RAB11FIP1	80223	6253	5	4.23e-12	0.96	up	2.0197	-0.355909	0.158975
chr8	134049898	134115156	-	GXT_22748129	ENST00000395352	GXL_172724	SLA	6503	2102	8	0.656	0.51	up	1.12955	-0.383657	-0.0449759
chr8	139600478	139734436	-	GXT_22748142	ENST00000341807	GXL_172566	COL22A1	169044	3584	39	0.416	0.96	up	1.12748	-0.185208	0.394216
chr3	24159705	24536313	-	GXT_22749903	ENST00000356447	GXL_744718	THRB	7068	6341	10	2.08e-61	3.94	up	3.07852	0.0795459	0.839039
chr3	31702320	32023238	-	GXT_22749929	ENST00000273142	GXL_13869	OSBPL10	114884	3921	13	4.96e-55	1.03	up	1.2199	-0.2991	0.697633
chr3	48663158	48672874	-	GXT_22750054	ENST00000395550	GXL_694083	SLC26A6	65010	2591	21	1.2e-232	2.52	up	2.17159	-1.23189	1.55082
chr3	48663419	48671028	-	GXT_22750056	ENST00000358747	GXL_694083	SLC26A6	65010	2219	20	6e-305	2.49	up	2.24649	-1.70229	1.92629
chr3	69219141	69435224	-	GXT_22750268	ENST00000398540	GXL_171078	FRMD4B	23150	5060	23	6.03e-176	2.66	up	1.10733	-0.955409	0.684996
chr3	124480795	124606144	-	GXT_22750441	ENST00000296181	GXL_181854	ITGB5	3693	4372	15	2.49e-14	0.44	up	1.32814	-0.386904	0.460076
chr3	125822412	125900029	-	GXT_22750458	ENST00000273450	GXL_181790	ALDH1L1	10840	3179	23	0.171	1.49	up	1.62795	-0.0260563	-0.260354
chr3	127291930	127309612	-	GXT_22750467	ENST00000355552	GXL_181907	TPRA1	131601	1933	11	4.99e-21	0.61	up	1.16869	-0.480507	-0.658024
chr3	129274018	129325661	-	GXT_22750497	ENST00000324093	GXL_181886	PLXND1	23129	7094	36	8.18e-65	0.79	up	1.60257	-0.852356	0.0122981
chr3	129274018	129325661	-	GXT_22750498	ENST00000393239	GXL_181886	PLXND1	23129	7101	36	9.05e-65	0.79	up	1.60257	-0.852375	0.0122378
chr3	185361763	185542812	-	GXT_22750715	ENST00000346192	GXL_193591	IGF2BP2	10644	3291	15	6.08e-22	0.61	up	1.3187	0.0414848	0.593805
chr4	47596015	47839966	-	GXT_22750999	ENST00000273857	GXL_125298	CORIN	10699	4852	22	0	5.79	up	3.06826	-0.537375	0.585686
chr4	83619200	83720010	-	GXT_22751138	ENST00000282709	GXL_220918	SCD5	79966	719	3	9.32e-10	1.24	up	1.57189	-0.192977	0.560463
chr4	85413140	85420231	-	GXT_22751157	ENST00000295886	GXL_220786	NKX6-1	4825	3256	3	0.0516	2.37	up	1.7726	0.101729	-0.180824
chr5	36248536	36302004	-	GXT_22751608	ENST00000296604	GXL_383385	RANBP3L	202151	3104	14	0.000287	1.58	up	1.8608	0.0685444	1.07712
chr5	132158012	132162002	-	GXT_22751910	ENST00000319854	GXL_103312	SHROOM1	134549	3189	7	3.54e-09	0.59	up	1.6078	-1.02498	0.808582
chr5	132158488	132162280	-	GXT_22751911	ENST00000355404	GXL_103312	SHROOM1	134549	2897	8	9.48e-10	0.65	up	1.6078	-1.16223	1.44916
chr5	140011313	140013286	-	GXT_22751997	ENST00000302014	GXL_103359	CD14	929	1886	2	0.000124	0.66	up	1.04781	-1.62983	-0.0835626
chr5	141689992	141704566	-	GXT_22752019	ENST00000344120	GXL_103106	SPRY4	81848	4938	3	6.07e-103	1.11	up	1.42662	-0.859794	0.316138
chr5	180630118	180632293	-	GXT_22752251	ENST00000334421	GXL_45253	TRIM7	81786	1228	2	2.95e-05	4.14	up	2.08604	-1.45678	1.45843
chr6	154726311	154831753	-	GXT_22752444	ENST00000367209	GXL_190749	CNKSR3	154043	3281	12	2.59e-121	1.67	up	1.12353	-0.125433	0.534547
chr6	170591294	170599561	-	GXT_22752547	ENST00000366756	GXL_826685	DLL1	28514	3174	11	0.0129	1.61	up	1.94072	-0.492648	-1.125
chr1	6324333	6419404	-	GXT_22752700	ENST00000377842	GXL_34797	ACOT7	11332	1813	9	1.57e-12	0.49	up	2.70479	-0.549142	-0.576052
chr1	20990509	21044510	-	GXT_22752907	ENST00000247986	GXL_34960	KIF17	57576	3969	15	0.0125	1.01	up	1.77689	-0.830137	-0.0457746
chr1	21922708	21995856	-	GXT_22752932	ENST00000374758	GXL_34941	RAP1GAP	5909	3588	26	0.551	1.26	up	3.16471	-0.449025	-0.288307
chr1	24382525	24393069	-	GXT_22752980	ENST00000338909	GXL_218316	MYOM3	127294	2693	10	0.697	0.54	up	1.18096	-0.630099	-0.169832
chr1	27938575	27961788	-	GXT_22753061	ENST00000374005	GXL_218414	FGR	2268	2728	13	0.181	1.04	up	1.32193	-0.645349	0.120433
chr1	38076951	38100337	-	GXT_22753215	ENST00000373059	GXL_218371	RSPO1	284654	2402	7	4.67e-106	6.64	up	4.79316	-0.29354	1.88943
chr1	38076951	38100337	-	GXT_22753218	ENST00000401070	GXL_218371	RSPO1	284654	2534	6	3.89e-112	6.41	up	4.79316	-0.29354	1.88943
chr1	38077240	38100595	-	GXT_22753219	ENST00000401069	GXL_218371	RSPO1	284654	2692	7	3.65e-119	6.51	up	5.12045	-0.302235	1.81274
chr1	38077484	38100288	-	GXT_22753220	ENST00000401068	GXL_218371	RSPO1	284654	2320	8	1.26e-108	6.96	up	4.80452	-0.278896	1.92458
chr1	119425670	119530428	-	GXT_22753921	ENST00000369429	GXL_152473	TBX15	6913	3504	8	3.37e-165	1.61	up	1.14854	-0.0798845	0.674035
chr1	153516089	153518361	-	GXT_22754165	ENST00000368716	GXL_152575	S100A4	6275	600	3	8.31e-19	0.79	up	1.96348	-0.101834	0.240223
chr1	154996047	155006257	-	GXT_22754253	ENST00000295536	GXL_152460	DCST2	127579	2000	13	0.863	0.53	up	1.12748	-0.802866	0.373387
chr1	162822818	162829454	-	GXT_22754526	ENST00000367911	GXL_151317	C1orf110	339512	738	4	0.137	0.86	up	1.1673	0.0336558	0.509985
chr1	162824087	162829454	-	GXT_22754528	ENST00000330296	GXL_151317	C1orf110	339512	1395	3	0.0621	0.85	up	1.1673	-0.0306975	0.569674
chr1	182351669	182360950	-	GXT_22754664	ENST00000311223	GXL_151294	GLUL	2752	3499	8	0	3.81	up	1.18857	-0.634712	1.49563
chr1	203309756	203320617	-	GXT_22754800	ENST00000354955	GXL_151201	FMOD	2331	3310	3	3.1e-186	1.31	up	1.14859	-0.250267	0.302028
chr1	204100190	204121131	-	GXT_22754802	ENST00000367202	GXL_151196	ETNK2	55224	2434	8	6.26e-47	4.72	up	3.20543	-0.103277	0.81325
chr1	204100191	204121307	-	GXT_22754803	ENST00000367199	GXL_151196	ETNK2	55224	2486	7	1.59e-45	4.82	up	3.20543	-0.113346	0.799867
chr1	204190349	204329044	-	GXT_22754814	ENST00000272203	GXL_151158	PLEKHA6	22874	5031	23	0	5.02	up	1.37901	-0.73569	0.728581
chr1	236139130	236228409	-	GXT_22755097	ENST00000366595	GXL_106576	NID1	4811	5412	17	3.53e-271	1.28	up	1.77011	-0.268379	0.996251
chr2	160794362	160919121	-	GXT_22755327	ENST00000283243	GXL_241096	PLA2R1	22925	8526	30	4.46e-30	0.74	up	1.11487	-0.144401	0.900953
chr2	183032974	183387103	-	GXT_22755452	ENST00000358139	GXL_241179	PDE1A	5136	1608	14	7.9e-37	2.97	up	1.12531	0.373991	1.19738
chr2	220420719	220436011	-	GXT_22755637	ENST00000265317	GXL_89023	OBSL1	23363	4413	13	1.31e-50	0.7	up	1.43462	-0.523722	-0.30463
chr2	220426444	220436011	-	GXT_22755638	ENST00000373873	GXL_89023	OBSL1	23363	3297	9	2.08e-50	0.76	up	1.43462	-0.677893	-0.563071
chr2	239146908	239148765	-	GXT_22755724	ENST00000272937	GXL_88986	HES6	55502	1454	4	7.24e-07	1.02	up	2.26062	-0.778661	-0.384558
chr17	4613784	4624795	+	GXT_22755829	ENST00000381488	GXL_45800	ARRB2	409	1960	15	3.22e-06	0.64	up	1.02905	-0.694573	-0.404144
chr18	2847028	2914090	+	GXT_22756429	ENST00000308080	GXL_70831	EMILIN2	84034	1697	6	3.72e-05	0.69	up	1.45583	-0.0943095	-0.020361
chr18	11981455	12008359	+	GXT_22756476	ENST00000383376	GXL_47213	IMPA2	3613	472	3	2.01e-109	3.85	up	1.43254	-1.07383	0.739695
chr18	18822203	19034524	+	GXT_22756502	ENST00000400483	GXL_692705	GREB1L	80000	2453	15	8.66e-47	3.23	up	4.15759	0.679595	1.52952
chr19	1450148	1473243	+	GXT_22756773	ENST00000238483	GXL_73968	APC2	10297	9329	10	0.000845	0.91	up	1.12748	-0.427737	-0.295216
chr19	10569977	10574691	+	GXT_22756987	ENST00000380686	GXL_262531	PDE4A	5141	964	6	7.84e-08	1.07	up	2.09484	-0.434336	0.205163
chr19	12902310	12904124	+	GXT_22757033	ENST00000302754	GXL_262474	JUNB	3726	1815	1	5.99e-11	0.42	up	1.04625	-0.309066	-0.0313583
chr19	17392454	17398454	+	GXT_22757118	ENST00000392729	GXL_744381	BABAM1/ANKLE1	-2	3212	9	0.0272	1.66	up	1.85482	-0.84066	-0.24602
chr19	17392454	17398454	+	GXT_22757119	ENST00000291449	GXL_744381	BABAM1/ANKLE1	-2	3134	9	0.015	1.81	up	1.85482	-0.840647	-0.246039
chr19	36205529	36207654	+	GXT_22757311	ENST00000392197	GXL_262122	ZBTB32	27033	1464	5	1	1.1	up	2.45831	-0.405361	-0.293349
chr19	41119770	41135725	+	GXT_22757428	ENST00000243562	GXL_262113	LTBP4	8425	2181	11	3.8e-05	0.43	up	1.13636	-0.94996	-0.0603426
chr19	45408956	45412650	+	GXT_22757528	ENST00000252486	GXL_262307	APOE	348	1263	4	2.1e-188	4.97	up	1.62795	-0.64104	0.632136
chr19	46002868	46005768	+	GXT_22757555	ENST00000396735	GXL_262199	PPM1N	147699	895	5	0.182	1.55	up	1.12748	-0.239555	0.418783
chr19	47844040	47845272	+	GXT_22757583	ENST00000257267	GXL_262160	GPR77	27202	1233	1	0	4.54	up	1.15311	-1.03988	1.88975
chr20	30458505	30532764	+	GXT_22758208	ENST00000375921	GXL_132590	TTLL9	164395	2402	15	0.516	0.64	up	1.34647	0.256327	-0.0132872
chr20	34679426	34818263	+	GXT_22758314	ENST00000202028	GXL_132646	EPB41L1	2036	3514	20	7e-19	0.56	up	1.16993	-0.370926	0.0756328
chr20	36531513	36572852	+	GXT_22758366	ENST00000373459	GXL_132706	VSTM2L	128434	831	2	3.84e-12	2.07	up	1.59162	-0.122405	-0.380493
chr20	36531499	36573745	+	GXT_22758368	ENST00000373458	GXL_132706	VSTM2L	128434	1908	3	4.36e-52	1.74	up	1.59162	-0.114209	-0.370088
chr20	44034711	44039250	+	GXT_22758471	ENST00000372722	GXL_481814	DBNDD2	55861	1202	4	2.75e-54	1.13	up	1.12883	-0.554442	-0.0638927
chr20	44035847	44039250	+	GXT_22758476	ENST00000372712	GXL_481814	DBNDD2	55861	1537	4	1.47e-55	1.13	up	1.1541	-0.465109	-0.128991
chr20	44746911	44758502	+	GXT_22758520	ENST00000372285	GXL_132729	CD40	958	1729	9	9.01e-06	1.88	up	2.04611	0.074932	-0.240062
chr20	61584052	61599949	+	GXT_22758687	ENST00000370351	GXL_81812	SLC17A9	63910	2539	13	7.78e-26	0.66	up	1.4129	-0.47861	-0.190985
chr21	33784689	33887699	+	GXT_22758829	ENST00000300255	GXL_163575	C21orf63	59271	1998	8	8.55e-209	2.66	up	1.27111	-0.173175	0.157625
chr21	36041688	36090525	+	GXT_22758878	ENST00000360731	GXL_163482	CLIC6	54102	3860	7	1.28e-15	3.26	up	1.34647	-0.00785298	0.62919
chr21	43934024	44001550	+	GXT_22758962	ENST00000352133	GXL_925621	SLC37A1	54020	3664	20	1.27e-13	2.44	up	1.10679	0.214528	0.0709963
chr21	44073923	44195619	+	GXT_22758971	ENST00000349112	GXL_176078	PDE9A	5152	1616	16	4.85e-05	3.3	up	1.31317	-0.383145	-0.285393
chr22	19705897	19710241	+	GXT_22759109	ENST00000330488	GXL_382759	GP1BB	2812	1487	11	1.73e-08	0.71	up	1.17747	-1.30013	0.571463
chr22	30792846	30820603	+	GXT_22759301	ENST00000312932	GXL_825531	SEC14L2/MTFP1	-2	3679	12	0	2.04	up	1.14884	-0.232666	0.414461
chr22	43547937	43559216	+	GXT_22759497	ENST00000329563	GXL_47776	TSPO	706	955	4	4.09e-21	0.55	up	1.27991	-0.559013	0.0190884
chr22	45898771	45997015	+	GXT_22759530	ENST00000327858	GXL_47751	FBLN1	2192	2896	17	0	2.68	up	2.08495	-1.5181	0.601916
chr22	45898719	45997014	+	GXT_22759531	ENST00000348697	GXL_47751	FBLN1	2192	2946	19	0	2.69	up	2.02932	-1.51759	0.601348
chr12	6309615	6347425	+	GXT_22759789	ENST00000009180	GXL_59643	CD9	928	1169	8	5.92e-30	0.68	up	1.24998	-0.698568	0.403674
chr12	32655041	32777637	+	GXT_22760001	ENST00000381025	GXL_779190	FGD4	121512	2064	13	1.1e-134	2.33	up	1.56711	-0.710434	1.26685
chr12	49878371	49921207	+	GXT_22760062	ENST00000395063	GXL_59477	SPATS2	65244	2784	11	3.09e-37	1.15	up	1.12748	0.0353194	0.728746
chr12	53443680	53458155	+	GXT_22760127	ENST00000262048	GXL_141690	TENC1	23371	5009	29	2.2e-93	1.17	up	1.49649	-0.6871	-0.218439
chr12	103981051	104160505	+	GXT_22760440	ENST00000258495	GXL_103649	STAB2	55576	8146	68	0.00148	2.18	up	1.50582	0.56035	-0.337564
chr13	27131840	27263080	+	GXT_22760512	ENST00000381468	GXL_40655	WASF3	10810	4834	10	8.91e-151	1.78	up	1.21161	-0.157494	0.654353
chr13	27131840	27263080	+	GXT_22760514	ENST00000361042	GXL_40655	WASF3	10810	4823	10	2.95e-172	1.79	up	1.21161	-0.157502	0.654359
chr13	32823676	32852976	+	GXT_22760551	ENST00000380218	GXL_40604	FRY	10129	1698	10	6.37e-05	0.78	up	1.3825	0.040169	0.512598
chr14	24780705	24786152	+	GXT_22761006	ENST00000345363	GXL_691963	LTB4R	1241	1616	2	0.0109	0.73	up	1.12531	-0.570352	0.761733
chr14	52781113	52795324	+	GXT_22761100	ENST00000245457	GXL_247699	PTGER2	5732	2383	2	0	4	up	2.26476	-0.845969	1.00808
chr14	61788435	62017698	+	GXT_22761161	ENST00000332981	GXL_247921	PRKCH	5583	3586	14	1.8e-28	2.22	up	2.07405	0.292949	0.383439
chr14	94640690	94693691	+	GXT_22761375	ENST00000393098	GXL_172828	PPP4R4	57718	476	4	4.2e-08	3.22	up	3.01535	-0.0630372	1.0773
chr14	105715008	105717421	+	GXT_22761503	ENST00000327471	GXL_172847	BTBD6	90135	1949	5	2.25e-32	0.62	up	1.51914	-0.483456	-0.208455
chr14	105715115	105717430	+	GXT_22761504	ENST00000392554	GXL_172847	BTBD6	90135	1972	4	1.64e-32	0.63	up	1.51914	-0.496655	-0.206365
chr15	41056218	41060084	+	GXT_22761607	ENST00000260447	GXL_4895	GCHFR	2644	953	3	2.37e-11	1.57	up	1.59789	-0.999453	1.29742
chr15	42867857	42965295	+	GXT_22761650	ENST00000333475	GXL_480407	STARD9	57519	6032	14	0.603	1.15	up	1	-0.36833	0.185962
chr15	51633877	51700210	+	GXT_22761729	ENST00000335449	GXL_4856	GLDN	342035	4920	10	5.5e-76	6.26	up	1.02809	-0.00820227	0.175517
chr15	68117941	68126174	+	GXT_22761822	ENST00000380035	GXL_316682	SKOR1	390598	2898	9	0.516	1	up	2.74839	-0.0648963	-0.286033
chr15	75641247	75647586	+	GXT_22761907	ENST00000336572	GXL_230362	NEIL1	79661	1340	10	0.000777	1.19	up	1.38372	-0.612968	-0.175521
chr15	78556428	78574538	+	GXT_22761926	ENST00000394855	GXL_230376	DNAJA4	55466	3245	8	8.14e-17	0.99	up	1.6542	-0.00355942	-0.130483
chr15	81489220	81606399	+	GXT_22761959	ENST00000394660	GXL_230287	IL16	3603	9616	19	5.15e-126	1.71	up	1.69949	-0.377912	0.218052
chr15	81517741	81601139	+	GXT_22761961	ENST00000302987	GXL_230287	IL16	3603	3999	18	2.15e-78	2.37	up	1.02809	-0.406666	0.228135
chr15	83776324	83806111	+	GXT_22761974	ENST00000379386	GXL_230379	TM6SF1	53346	1918	10	3.09e-16	1.61	up	2.04738	-0.537348	0.898957
chr15	83776159	83806111	+	GXT_22761975	ENST00000322019	GXL_230379	TM6SF1	53346	2074	10	1.96e-16	1.64	up	2.48566	-0.537786	0.898198
chr15	83776324	83806111	+	GXT_22761977	ENST00000379390	GXL_230379	TM6SF1	53346	1589	7	6.5e-11	1.5	up	2.04738	-0.537338	0.898963
chr15	83776324	83806111	+	GXT_22761978	ENST00000258909	GXL_230379	TM6SF1	53346	1506	6	2.35e-08	1.4	up	2.04738	-0.537335	0.898966
chr15	84322838	84530325	+	GXT_22761981	ENST00000286745	GXL_230412	ADAMTSL3	57188	1115	9	0.00103	0.63	up	1.95994	-0.148477	0.3764
chr16	475619	573011	+	GXT_22762119	ENST00000262305	GXL_167449	RAB11FIP3	9727	4832	14	7.04e-107	1.16	up	1.42776	-0.347802	0.00717671
chr16	776958	779715	+	GXT_22762143	ENST00000341413	GXL_167495	HAGHL	84264	1701	7	0.0016	0.87	up	2.35082	-1.1188	0.223159
chr16	2076896	2088480	+	GXT_22762204	ENST00000191922	GXL_167602	SLC9A3R2	9351	1620	7	1.08e-81	1.23	up	2.23705	-1.44342	0.314722
chr16	3014160	3018381	+	GXT_22762247	ENST00000303746	GXL_167456	KREMEN2	79412	2111	9	0.0634	1.36	up	1.6078	-0.12259	-0.453656
chr16	3019246	3023490	+	GXT_22762249	ENST00000318782	GXL_167500	PAQR4	124222	2793	3	2.27e-105	1.67	up	1.51293	-0.663195	-0.293821
chr16	3019342	3023483	+	GXT_22762250	ENST00000293978	GXL_167500	PAQR4	124222	2468	2	6.88e-114	1.68	up	1.54638	-0.724806	-0.285739
chr16	19125282	19132946	+	GXT_22762373	ENST00000381440	GXL_664172	ITPRIPL2	162073	7665	1	1.37e-59	0.89	up	1.39059	-0.192224	0.127728
chr16	21689835	21772049	+	GXT_22762403	ENST00000286149	GXL_692342	OTOA	146183	3651	28	1	0.52	up	2.40483	0.0570757	-0.355866
chr16	27414423	27462115	+	GXT_22762456	ENST00000395755	GXL_98527	IL21R	50615	3263	9	8.23e-87	1.68	up	1.05718	-0.380089	0.550585
chr16	28889809	28915765	+	GXT_22762479	ENST00000395498	GXL_1225326	ATP2A1	487	2608	18	0.0457	0.9	up	2.39119	-0.580435	0.158479
chr16	50582241	50670647	+	GXT_22762621	ENST00000268459	GXL_98563	NKD1	85407	4592	10	1.87e-09	4.82	up	3.09665	-0.167686	0.858499
chr16	56226148	56378096	+	GXT_22762641	ENST00000262494	GXL_98588	GNAO1	2775	1299	8	0.389	2.15	up	1.6379	-0.0583743	-0.536135
chr16	56710102	56718107	+	GXT_22762656	ENST00000394490	GXL_98680	MT1X/MT1IP	-2	332	3	0	2.91	up	1.15311	-0.461926	0.453403
chr16	84328252	84363457	+	GXT_22762893	ENST00000219454	GXL_89821	WFDC1	58189	1534	7	9.02e-220	2.51	up	1.03375	-0.45782	0.253755
chr16	89894907	89937727	+	GXT_22762964	ENST00000393062	GXL_89926	SPIRE2	84501	3101	13	0.02	0.93	up	2.00814	-0.498488	0.13947
chr17	48638821	48704626	+	GXT_22763016	ENST00000359106	GXL_8620	CACNA1G	8913	7649	38	1.41e-10	2.55	up	4.374	-0.602938	0.42863
chr17	48638821	48704626	+	GXT_22763020	ENST00000358244	GXL_8620	CACNA1G	8913	7031	35	4.69e-10	2.5	up	4.374	-0.602927	0.428569
chr17	73592471	73616761	+	GXT_22763192	ENST00000293201	GXL_381901	MYO15B	80022	4592	38	0.344	0.48	up	2.09484	-0.589272	-0.287943
chr17	73616796	73622923	+	GXT_22763193	ENST00000226258	GXL_381901	MYO15B	80022	2240	15	0.0862	1.64	up	2.70479	-0.342112	-1.13683
chr17	73717516	73753898	+	GXT_22763198	ENST00000339591	GXL_8642	ITGB4	3691	5867	40	4.44e-26	3.82	up	3.89135	-0.954314	0.918445
chr17	77751993	77761378	+	GXT_22763251	ENST00000310942	GXL_175536	CBX2	84733	4178	5	0.0296	0.85	up	1.37984	-0.230645	0.103474
chr10	13206128	13253104	+	GXT_22763426	ENST00000378694	GXL_90485	MCM10	55388	4587	18	4.29e-17	0.96	up	1.56358	0.215322	-0.143738
chr10	18429606	18830056	+	GXT_22763461	ENST00000324631	GXL_90449	CACNB2	783	3446	14	9.82e-17	3.11	up	4.29983	0.225409	0.886388
chr10	18429887	18830056	+	GXT_22763464	ENST00000282343	GXL_90449	CACNB2	783	3524	14	9.82e-17	3.11	up	4.22105	0.228015	0.886201
chr10	18430109	18828653	+	GXT_22763465	ENST00000377331	GXL_90449	CACNB2	783	1827	14	7.15e-07	3.19	up	4.4483	0.231337	0.886441
chr10	31608126	31817847	+	GXT_22763549	ENST00000320985	GXL_90522	ZEB1	6935	5068	9	2.24e-21	0.54	up	1.16529	0.386201	0.489239
chr10	111986859	112044887	+	GXT_22764156	ENST00000369614	GXL_134238	MXI1	4601	774	6	1.72e-09	0.62	up	1.41346	0.178641	2.03585
chr10	116853384	117708503	+	GXT_22764215	ENST00000355044	GXL_134139	ATRNL1	26033	8479	29	0.00036	1.29	up	1.10934	0.613468	0.208804
chr10	116853510	117357306	+	GXT_22764216	ENST00000303745	GXL_134139	ATRNL1	26033	3999	27	0.191	0.75	up	1.20147	0.721212	0.214856
chr10	120789938	120791045	+	GXT_22764228	ENST00000340087	GXL_134324	NANOS1	340719	1108	1	2.96e-06	1.52	up	1.58206	-0.289631	0.0492846
chr10	123969387	124014057	+	GXT_22764251	ENST00000369001	GXL_134200	TACC2	10579	3229	14	4.44e-10	0.64	up	1.12531	-0.358544	0.218037
chr10	123923359	124014053	+	GXT_22764253	ENST00000260733	GXL_134200	TACC2	10579	3644	17	7.3e-10	0.62	up	1.30152	-0.400396	-0.127549
chr10	123922941	124014060	+	GXT_22764254	ENST00000360561	GXL_134200	TACC2	10579	3979	16	1.01e-09	0.62	up	1.60783	-0.416135	-0.124467
chr10	123923105	124013998	+	GXT_22764255	ENST00000368999	GXL_134200	TACC2	10579	3879	18	1.16e-09	0.62	up	1.58742	-0.418513	-0.126406
chr11	2161874	2169037	+	GXT_22764455	ENST00000381363	GXL_123380	IGF2AS	51214	1867	2	2.54e-28	6.63	up	4.3155	-0.714493	1.56002
chr11	10472228	10528565	+	GXT_22764580	ENST00000396554	GXL_123372	AMPD3	272	3806	15	4.95e-22	1.54	up	1.93007	-1.08113	0.754588
chr11	13984452	14287233	+	GXT_22764603	ENST00000310358	GXL_123201	SPON1	10418	2423	16	1e-298	4.03	up	2.2729	0.524075	0.955946
chr11	26352971	26684835	+	GXT_22764651	ENST00000256737	GXL_170748	ANO3	63982	6641	27	0.115	0.93	up	1.31317	0.89567	0.349864
chr11	44587141	44641913	+	GXT_22764717	ENST00000227155	GXL_170777	CD82	3732	2289	10	8.86e-85	1.69	up	1.4974	-1.24354	-0.126504
chr11	44587151	44640676	+	GXT_22764718	ENST00000342935	GXL_170777	CD82	3732	967	9	9.91e-63	1.62	up	1.4974	-1.24855	-0.128915
chr11	57228339	57236103	+	GXT_22764829	ENST00000395120	GXL_170977	RTN4RL2	349667	581	3	0.568	2.33	up	2.65984	-0.379526	1.08245
chr11	65123262	65124744	+	GXT_22765042	ENST00000394262	GXL_170994	TIGD3	220359	1483	1	0.568	2.28	up	1.43314	-0.105039	-0.252351
chr11	67171658	67177557	+	GXT_22765119	ENST00000312390	GXL_38995	TBC1D10C	374403	1689	9	0.639	1.55	up	2.74839	-0.691092	-0.133423
chr11	94277017	94283063	+	GXT_22765295	ENST00000358752	GXL_744144	FUT4/PIWIL4	-2	6047	1	4.95e-09	0.57	up	1.33337	-0.189945	0.0822258
chr11	111782966	111784817	+	GXT_22765350	ENST00000304298	GXL_1223643	HSPB2	3316	1335	2	1.36e-55	1.09	up	1.05764	0.0786041	0.0134396
chr11	118478358	118528735	+	GXT_22765427	ENST00000356063	GXL_174035	PHLDB1	23187	5240	21	2.09e-38	0.56	up	1.52835	-0.788325	-0.211232
chr12	122688090	122692084	+	GXT_22765702	ENST00000324189	GXL_103704	B3GNT4	79369	1642	3	0.484	1.83	up	1.10075	-0.275069	0.0269015
chr8	1772142	1874704	+	GXT_22765806	ENST00000382794	GXL_316991	ARHGEF10	9639	2840	22	1.24e-14	0.6	up	1.25817	-0.187602	-0.149008
chr8	1772181	1851671	+	GXT_22765807	ENST00000398560	GXL_316991	ARHGEF10	9639	1996	16	6.05e-11	0.54	up	1.25817	-0.260299	-0.191164
chr8	17433942	17500616	+	GXT_22765873	ENST00000251630	GXL_42491	PDGFRL	5157	1875	7	1.82e-112	3.68	up	1.038	-0.342651	0.836766
chr8	22409208	22433301	+	GXT_22765916	ENST00000240123	GXL_42482	SORBS3	10174	3459	21	2.6e-16	0.47	up	1.70984	-1.07058	0.283066
chr9	87284693	87637409	+	GXT_22766300	ENST00000277120	GXL_317026	NTRK2	4915	4057	19	4.58e-29	2.15	up	1.58225	0.445296	0.691797
chr9	87284693	87492813	+	GXT_22766301	ENST00000376208	GXL_317026	NTRK2	4915	8178	14	7.57e-29	2.17	up	1.58225	0.330195	0.69887
chr9	87284693	87492813	+	GXT_22766302	ENST00000304053	GXL_317026	NTRK2	4915	8226	15	7.57e-29	2.17	up	1.58225	0.330147	0.698837
chr9	87285311	87637238	+	GXT_22766303	ENST00000323115	GXL_317026	NTRK2	4915	3708	17	1.61e-30	2.09	up	2.22199	0.44604	0.698093
chr9	91605836	91606979	+	GXT_22766322	ENST00000375850	GXL_15176	S1PR3	1903	859	2	7.57e-12	3.63	up	2.63903	-1.3548	0.360153
chr9	124088860	124094940	+	GXT_22766554	ENST00000373806	GXL_185045	GSN	2934	879	6	1.06e-146	1.56	up	1.6078	-0.57636	-0.145883
chr9	127539550	127577157	+	GXT_22766609	ENST00000373580	GXL_184892	OLFML2A	169611	6425	8	0	4.48	up	3.17286	-1.96842	1.0011
chr9	129724504	129980091	+	GXT_22766650	ENST00000373434	GXL_695653	RALGPS1	9649	2466	17	0.0695	0.72	up	1.3825	-0.658688	0.592113
chr9	130159505	130169570	+	GXT_22766662	ENST00000373352	GXL_184914	SLC2A8	29988	914	7	1.41e-18	1.9	up	2.06225	-1.68611	-0.165984
chr9	133971938	133998532	+	GXT_22766800	ENST00000372300	GXL_184925	AIF1L	83543	3284	6	0.504	0.61	up	2.09484	-0.336494	-0.272984
chr9	137967366	138013024	+	GXT_22766872	ENST00000252854	GXL_185013	OLFM1	10439	2591	6	0.369	0.51	up	2.09484	-0.445005	0.0998885
chr9	139839698	139840813	+	GXT_22766932	ENST00000371634	GXL_184996	C8G	733	567	5	0.603	0.53	up	1.12365	-0.846162	-0.260231
chr9	140172201	140177093	+	GXT_22766963	ENST00000357503	GXL_184924	C9orf167	54863	4148	2	7.67e-50	1.13	up	2.16858	-0.136771	-0.161489
chr6	7541808	7586950	+	GXT_22767427	ENST00000379802	GXL_156154	DSP	1832	9796	24	5.5e-31	0.58	up	1.0596	0.200132	0.123006
chr6	7727030	7881655	+	GXT_22767430	ENST00000283147	GXL_156258	BMP6	654	2780	7	0	6.29	up	3.00411	-1.21694	1.20602
chr6	30850753	30858775	+	GXT_22767702	ENST00000396342	GXL_926176	DDR1	780	675	5	0.00688	0.5	up	1.31317	-1.36774	0.276119
chr6	112375275	112390889	+	GXT_22768354	ENST00000368666	GXL_261205	WISP3	8838	1417	5	0.339	0.5	up	1.20784	0.433312	-0.354593
chr7	30951470	30965131	+	GXT_22768601	ENST00000311813	GXL_744872	AQP1	358	2752	4	9.29e-40	1.55	up	1.64611	-1.17516	-0.162027
chr7	30951468	30963624	+	GXT_22768602	ENST00000265298	GXL_744872	AQP1	358	1029	5	2.58e-11	1.75	up	1.64611	-1.21567	-0.158121
chr7	100136882	100163269	+	GXT_22768982	ENST00000262935	GXL_78307	AGFG2	3268	1869	10	1.43e-104	1.93	up	1.5898	-0.455247	1.09154
chr8	23432167	23432316	+	GXT_22769431	ENST00000399967	GXL_1237225	SLC25A37	51312	150	1	0.486	0.42	up	1.12748	-0.0523747	-0.447944
chr8	145691426	145699585	+	GXT_22769873	ENST00000301332	GXL_114995	KIFC2	90990	3645	17	0.00152	0.46	up	0.988916	-0.517988	0.0405174
chr8	145691738	145698177	+	GXT_22769874	ENST00000301331	GXL_114995	KIFC2	90990	1723	15	0.00121	0.65	up	1.81434	-0.597227	0.03946
chr2	20866424	20873418	+	GXT_22770984	ENST00000272224	GXL_42228	GDF7	151449	4162	2	1.02e-17	5.51	up	4.54185	-0.641226	0.789703
chr2	36923914	37041929	+	GXT_22771089	ENST00000389975	GXL_42138	VIT	5212	2683	15	1.28e-191	3.75	up	1.22501	-0.136772	0.678617
chr2	36924009	37041932	+	GXT_22771090	ENST00000379241	GXL_42138	VIT	5212	2525	14	6.68e-178	3.8	up	1.31349	-0.137201	0.676898
chr2	64681613	64688515	+	GXT_22771195	ENST00000238875	GXL_693742	HSPC159	29094	3539	5	0.000133	0.53	up	0.994025	-0.0459923	-0.192795
chr2	96991961	96994066	+	GXT_22771374	ENST00000361124	GXL_131854	ITPRIPL1	150771	2106	1	0.00234	2.98	up	2.8288	-1.3136	1.28955
chr3	12328867	12475843	+	GXT_22771622	ENST00000397010	GXL_193541	PPARG	5468	2017	8	1.29e-104	3.02	up	2.34197	-0.493273	0.500409
chr3	12329400	12475810	+	GXT_22771624	ENST00000397015	GXL_193541	PPARG	5468	1722	7	2.38e-103	2.98	up	2.82534	-0.486812	0.500629
chr3	12330337	12475843	+	GXT_22771625	ENST00000397012	GXL_193541	PPARG	5468	2006	8	3.45e-104	3.03	up	3.51575	-0.462002	0.50368
chr3	37493610	37865005	+	GXT_22771728	ENST00000264741	GXL_193520	ITGA9	3680	7889	28	2.36e-215	3.23	up	1.75998	0.334621	1.18254
chr3	39851096	40301812	+	GXT_22771755	ENST00000302541	GXL_169667	MYRIP	25924	5077	17	2.2e-46	3.98	up	2.53899	-0.0468583	0.713069
chr3	46924847	46945284	+	GXT_22771834	ENST00000313049	GXL_694078	PTH1R	5745	2123	14	3.26e-08	3.23	up	2.81285	-0.593771	0.775867
chr4	1795560	1810598	+	GXT_22772545	ENST00000260795	GXL_164857	FGFR3	2261	4132	17	4.56e-13	2.42	up	2.70479	-0.623544	0.491898
chr4	1795623	1810598	+	GXT_22772546	ENST00000352904	GXL_164857	FGFR3	2261	3733	15	4.34e-14	2.5	up	2.70479	-0.622484	0.504844
chr4	1808843	1809414	+	GXT_22772547	ENST00000312875	GXL_164857	FGFR3	2261	531	2	0.00255	4.17	up	1.6078	-1.16522	0.319019
chr4	2061539	2070816	+	GXT_22772558	ENST00000331662	GXL_826114	NAT8L/C4orf48	-2	5571	3	0.32	1.59	up	1.6078	-0.637419	0.00470583
chr5	1008944	1039058	+	GXT_22773184	ENST00000296849	GXL_45329	NKD2	85409	2155	10	2.76e-20	6.12	up	1.69949	-0.785035	-0.23579
chr5	67586465	67594411	+	GXT_22773355	ENST00000336483	GXL_5934	PIK3R1	5295	2439	10	1e-307	2.19	up	1.19227	-0.442168	0.773113
chr5	75699074	76003957	+	GXT_22773424	ENST00000274364	GXL_6153	IQGAP2	10788	5844	36	0.108	1.9	up	1.05271	0.328767	0.0763704
chr5	76506706	76725632	+	GXT_22773433	ENST00000264917	GXL_6003	PDE8B	8622	5956	22	1.33e-27	1.75	up	1.56672	0.0796513	0.791949
chr5	76506751	76722458	+	GXT_22773434	ENST00000342343	GXL_6003	PDE8B	8622	2677	21	1.07e-23	5.28	up	1.47817	0.082117	0.741337
chr5	76506706	76723243	+	GXT_22773435	ENST00000340978	GXL_6003	PDE8B	8622	3426	21	5.48e-21	2.76	up	1.56672	0.082178	0.748678
chr5	76506751	76722458	+	GXT_22773436	ENST00000333194	GXL_6003	PDE8B	8622	2572	21	8.22e-22	5.15	up	1.47817	0.082148	0.741337
chr5	76506706	76723243	+	GXT_22773437	ENST00000346042	GXL_6003	PDE8B	8622	3276	19	7.06e-21	2.73	up	1.56672	0.0821806	0.748668
chr5	115298151	115346248	+	GXT_22773545	ENST00000395528	GXL_6087	AQPEP	206338	2294	14	0.0108	2.25	up	0.989073	0.0308129	0.11678
chr5	115298315	115363298	+	GXT_22773546	ENST00000379578	GXL_6087	AQPEP	206338	4425	21	6.78e-09	3.02	up	1.09646	0.151394	0.191079
chr5	126626551	126796914	+	GXT_22773581	ENST00000274473	GXL_6060	MEGF10	84466	7594	26	0.0287	1.04	up	1.95448	0.0803091	0.498043
chr5	133861363	133915504	+	GXT_22773634	ENST00000361895	GXL_27426	PHF15	23338	3212	11	6.38e-38	0.89	up	1.32863	-0.792294	0.0315214
chr5	140255058	140391929	+	GXT_22773722	ENST00000398631	GXL_27407	PCDHA9	9752	5233	4	0.005	0.76	up	1.15311	0.0197793	0.141772
chr5	148521046	148640105	+	GXT_22773791	ENST00000326685	GXL_27402	ABLIM3	22885	4164	20	3.85e-178	1.95	up	1.27891	-0.758631	0.163096
chr5	149109861	149227125	+	GXT_22773798	ENST00000360453	GXL_926127	PPARGC1B	133522	3004	11	1	0.59	up	1.29643	0.135774	-0.473153
chr6	144032170	144147192	+	GXT_22774064	ENST00000367582	GXL_232796	PHACTR2	9749	4044	12	4.08e-144	1.62	up	2.16085	-0.0322047	1.67469
chr1	8378169	8404227	+	GXT_22774384	ENST00000377479	GXL_481283	SLC45A1	50651	2503	9	0.00191	0.58	up	2.11231	-0.985594	0.436289
chr1	20878932	20881512	+	GXT_22774609	ENST00000332947	GXL_59165	FAM43B	163933	2581	1	0.000306	1.29	up	2.72834	-0.309802	-0.110974
chr1	25943959	26112698	+	GXT_22774689	ENST00000374332	GXL_59146	MAN1C1	57134	4641	12	3.28e-17	1.13	up	2.81615	-0.335505	0.528642
chr1	38259474	38266805	+	GXT_22774924	ENST00000373045	GXL_316525	MANEAL	149175	2685	4	0.0015	1.01	up	2.30946	-0.556913	0.861648
chr1	53308183	53360663	+	GXT_22775172	ENST00000371529	GXL_47107	ZYG11A	440590	3682	14	0.272	1.23	up	2.15386	-0.052543	-0.15078
chr1	53308183	53360670	+	GXT_22775173	ENST00000371532	GXL_47107	ZYG11A	440590	3942	13	0.272	1.23	up	2.15386	-0.053319	-0.150729
chr1	53308408	53360670	+	GXT_22775174	ENST00000371528	GXL_47107	ZYG11A	440590	4469	14	0.697	0.69	up	2.0589	-0.0530365	-0.145664
chr1	53527854	53551174	+	GXT_22775178	ENST00000371500	GXL_47125	PODN	127435	3287	13	4e-76	1.12	up	1.29086	-1.13212	-0.319378
chr1	61547980	61922029	+	GXT_22775222	ENST00000371189	GXL_779403	NFIA	4774	3051	11	4.97e-43	1.98	up	0.987217	-0.460603	1.59361
chr1	61548296	61921198	+	GXT_22775224	ENST00000371185	GXL_779403	NFIA	4774	1838	10	1.06e-56	1.83	up	1.11704	-0.462086	1.59387
chr1	61548311	61921159	+	GXT_22775225	ENST00000371184	GXL_779403	NFIA	4774	1463	7	3.63e-26	1.89	up	1.13429	-0.462096	1.59388
chr1	65210778	65298912	+	GXT_22775257	ENST00000294428	GXL_47069	RAVER2	55225	4398	12	0.00103	0.43	up	1.00099	0.343778	0.426949
chr1	93913725	94020218	+	GXT_22775455	ENST00000370253	GXL_228222	FNBP1L	54874	5465	15	3.13e-169	1.74	up	1.01356	0.103865	0.835629
chr1	110009250	110024759	+	GXT_22775553	ENST00000369872	GXL_925438	SYPL2	284612	3624	6	1.92e-40	2.46	up	1.37532	0.240815	0.382117
chr1	113051400	113065288	+	GXT_22775627	ENST00000369684	GXL_925447	WNT2B	7482	3818	5	8.29e-10	1.18	up	1.45072	-1.40136	0.317237
chr1	154377669	154441926	+	GXT_22775923	ENST00000368485	GXL_57713	IL6R	3570	5914	10	1.58e-62	2.04	up	1.01602	-0.719069	0.360285
chr1	154377699	154439353	+	GXT_22775924	ENST00000344086	GXL_57713	IL6R	3570	3217	9	1.83e-18	1.73	up	1.06787	-0.760222	0.361819
chr1	155006446	155021740	+	GXT_22775950	ENST00000368419	GXL_925479	ADAM15/DCST1	-2	2207	16	0.568	2.28	up	1.12748	-0.355748	0.260178
chr1	159750793	159752333	+	GXT_22776117	ENST00000368107	GXL_57672	DUSP23	54935	756	2	0	3.19	up	1.56693	-1.28954	0.939755
chr1	204042732	204096863	+	GXT_22776565	ENST00000367204	GXL_120859	SOX13	9580	3593	14	4.91e-13	1.12	up	1.42075	-0.614248	0.278207
chr1	209931843	209955652	+	GXT_22776677	ENST00000367024	GXL_120772	TRAF3IP3	80342	2331	17	0.474	0.74	up	3.13217	-0.0337896	0.19426
chr1	233765353	233807984	+	GXT_22776883	ENST00000366620	GXL_19282	KCNK1	3775	2001	5	2.6e-15	1.54	up	1.47104	0.000781137	0.391566
chr1	248058858	248059899	+	GXT_22776980	ENST00000360358	GXL_744535	OR2W3	343171	1042	1	0.551	1.18	up	1.42745	-0.160686	1.05775
chr2	143635067	143799890	+	GXT_22777094	ENST00000264170	GXL_57861	KYNU	8942	1805	14	0.329	0.6	up	1.3825	0.423007	0.451618
chr2	143635067	143746435	+	GXT_22777095	ENST00000392874	GXL_57861	KYNU	8942	1182	11	0.269	0.81	up	1.3825	0.284638	0.28821
chr2	201450591	201536214	+	GXT_22777317	ENST00000374700	GXL_316815	AOX1	316	5070	35	0	5.01	up	1.15525	-0.468569	1.31905
chr2	211421262	211543831	+	GXT_22777424	ENST00000233072	GXL_119711	CPS1	1373	5821	38	7.94e-06	0.58	up	1.31317	0.463988	0.648078
chr2	233497938	233547491	+	GXT_22777585	ENST00000264059	GXL_925811	EFHD1	80303	2259	4	2.27e-219	5.29	up	3.07333	-0.549605	1.29072
chr11	1753640	1771821	-	GXT_22777783	ENST00000340134	GXL_823450	CTSD	1509	3706	3	2.74e-18	0.47	up	1.45973	-0.630041	0.0920219
chr11	1753640	1771810	-	GXT_22777784	ENST00000382123	GXL_823450	CTSD	1509	3807	4	3.92e-18	0.47	up	1.47071	-0.62974	0.0998228
chr12	123646662	123706441	-	GXT_22777894	ENST00000392425	GXL_66181	MPHOSPH9	10198	2784	17	0.00124	0.54	up	1.15311	0.18272	0.620331
chr14	24550217	24551137	-	GXT_22777949	ENST00000396995	GXL_155838	NRL	4901	810	2	0.603	0.79	up	1.53499	-0.0547383	-0.472983
chr17	73754137	73761261	-	GXT_22778184	ENST00000375188	GXL_35971	GALK1	2584	1250	10	4.33e-06	0.55	up	1.61618	-0.849993	0.636492
chr1	24382531	24392698	-	GXT_22778338	ENST00000374442	GXL_218316	MYOM3	127294	2324	9	0.697	0.54	up	1.42745	-0.595337	-0.107912
chr20	35526174	35580176	-	GXT_22778506	ENST00000373694	GXL_122630	SAMHD1	25939	1822	14	0	2.97	up	1.8766	-0.735926	2.64598
chr21	45646717	45660849	-	GXT_22778554	ENST00000400377	GXL_163641	ICOSLG	23308	2907	6	0.639	0.91	up	1.53499	-0.187868	-0.77365
chr2	220415478	220435963	-	GXT_22778677	ENST00000373876	GXL_89023	OBSL1	23363	5503	20	3.22e-50	0.71	up	1.45503	-0.603656	-0.169515
chr3	127291936	127309577	-	GXT_22778722	ENST00000393400	GXL_181907	TPRA1	131601	1831	10	9.5e-22	0.62	up	1.18828	-0.481784	-0.691196
chr5	132158488	132161832	-	GXT_22778818	ENST00000378676	GXL_103312	SHROOM1	134549	2352	6	5.45e-08	0.62	up	1.6078	-1.02689	1.18693
chr6	136878191	137113656	-	GXT_22778930	ENST00000355845	GXL_190836	MAP3K5	4217	5191	30	2.68e-97	1.28	up	1.3478	-0.0202104	0.329433
chr9	94473787	94711172	-	GXT_22779104	ENST00000375710	GXL_190074	ROR2	4920	2719	12	1.31e-13	2.41	up	2.78615	0.0439279	0.69073
chr11	1856034	1858751	+	GXT_22779359	ENST00000341958	GXL_123160	SYT8	90019	1556	8	0.00186	2.88	up	1.6078	-1.06286	0.291479
chr14	54879587	54886796	+	GXT_22779517	ENST00000395577	GXL_247824	CDKN3	1033	96	2	0.113	2.12	up	1.31317	0.21563	0.860135
chr19	40520267	40521742	+	GXT_22779822	ENST00000392042	GXL_262170	ZNF546	339327	1335	3	0.061	0.84	up	1.85482	-0.186256	INF
chr20	42295797	42345136	+	GXT_22780086	ENST00000396863	GXL_132726	MYBL2	4605	2639	14	2.4e-05	0.44	up	1.27329	-0.554936	-0.264144
chr21	33785010	33887699	+	GXT_22780128	ENST00000382699	GXL_163575	C21orf63	59271	1668	8	7.98e-87	2.69	up	1.41848	-0.170023	0.164996
chr21	35772002	35774435	+	GXT_22780132	ENST00000399291	GXL_163583	FAM165B	54065	243	2	0.343	0.73	up	1.06755	-0.0457273	-1.4334
chr2	95975970	96051824	+	GXT_22780230	ENST00000360990	GXL_1230033	KCNIP3	30818	2798	9	3.27e-41	6.71	up	2.65984	-0.577555	0.883571
chr9	35792151	35809729	+	GXT_22780625	ENST00000378051	GXL_12750	NPR2	4882	3457	21	2.37e-17	0.54	up	1.337	-0.228321	-0.0677383
chr10	135169987	135171526	-	GXT_22780948	AK310070	GXL_90555	C10orf125	282969	907	3	0.00362	1.01	up	3.96931	-0.827939	0.632929
chr11	64494774	64510476	-	GXT_22781077	AK314637	GXL_41560	RASGRP2	10235	1968	15	5.98e-07	4.37	up	2.30946	-0.427714	0.535862
chr11	2154217	2158518	-	GXT_22781139	AK313938	GXL_479536	IGF2	3481	646	4	0	5.04	up	3.64894	-3.72255	3.21895
chr11	62369689	62379953	-	GXT_22781258	AK310579	GXL_41525	EML3	256364	1985	16	3.68e-09	0.54	up	0.991871	-0.978509	0.431509
chr11	124623542	124632186	-	GXT_22781272	AK314710	GXL_744151	VSIG2	23584	1320	7	0.225	1.3	up	3.32069	0.0395032	-0.628539
chr11	67259504	67271655	-	GXT_22781286	AK312886	GXL_41522	PITPNM1	9600	3739	23	1.13e-63	1.36	up	2.18822	-0.793508	0.260509
chr11	3114615	3187969	-	GXT_22781346	AK309411	GXL_141014	OSBPL5	114879	2225	17	4.01e-116	1.62	up	1.61835	-0.930722	0.872797
chr11	74977095	75062703	-	GXT_22781371	AK289718	GXL_1223408	ARRB1	408	1421	16	0.0112	0.48	up	1.14104	-0.620461	-0.0914878
chr11	1756367	1769195	-	GXT_22781377	AK289574	GXL_823450	CTSD	1509	592	2	1.33e-11	0.45	up	1.30704	-0.24967	0.534469
chr11	3109231	3186529	-	GXT_22781387	AK293000	GXL_141014	OSBPL5	114879	2746	21	3.19e-223	1.57	up	1.52617	-0.919498	0.966216
chr11	44956129	44972267	-	GXT_22781391	AK292837	GXL_140993	TP53I11	9537	947	7	4.26e-08	0.42	up	1.33611	-1.23004	0.0307699
chr11	2153929	2158518	-	GXT_22781430	AK291594	GXL_479536	IGF2	3481	934	4	0	5.12	up	3.64894	-3.59832	3.1875
chr12	15035073	15038788	-	GXT_22781466	AK312029	GXL_139911	MGP	4256	375	4	0	2.6	up	1.6516	0.452733	0.54036
chr12	6747242	6756577	-	GXT_22781498	AK311572	GXL_744156	LPAR5/ACRBP	-2	1694	10	0.885	0.54	up	1.50582	-0.00554345	-0.128782
chr12	54798978	54812905	-	GXT_22781557	AK311051	GXL_193957	ITGA5	3678	1007	11	1.24e-62	1.01	up	1.13997	-0.200738	0.0182398
chr12	15261805	15374291	-	GXT_22781559	AK311016	GXL_139848	RERG	85004	905	3	4.37e-158	6.86	up	1.97068	0.212873	1.55892
chr12	53200384	53207900	-	GXT_22781575	AK307941	GXL_193774	KRT4	3851	1839	9	0.776	1.45	up	1.42745	0.0997125	2.49945
chr12	69250217	69326951	-	GXT_22781611	AK313180	GXL_193797	CPM	1368	1365	9	0	7.07	up	2.11789	-0.69094	2.20693
chr12	71519114	71551620	-	GXT_22781613	AK313112	GXL_193932	TSPAN8	7103	876	8	2.71e-14	2.83	up	1.64611	0.458964	0.88097
chr12	15035988	15038788	-	GXT_22781656	AK310040	GXL_139911	MGP	4256	1316	2	6e-171	2.49	up	1.6516	0.944217	0.545733
chr12	6747448	6756598	-	GXT_22781659	AK312782	GXL_744156	LPAR5/ACRBP	-2	1698	10	0.759	0.69	up	1.37901	0.0189272	-0.0867754
chr12	54790077	54813050	-	GXT_22781675	AK312414	GXL_193957	ITGA5	3678	3218	30	3.92e-60	1.03	up	1.18476	-0.476434	-0.00138013
chr12	54789937	54812995	-	GXT_22781758	AK291570	GXL_193957	ITGA5	3678	3303	30	1.66e-137	1.04	up	1.17831	-0.473405	0.00846333
chr13	77458893	77460540	-	GXT_22781809	AK311543	GXL_159071	KCTD12	115207	1010	2	3.42e-52	0.79	up	1.35005	-1.17511	0.00335878
chr13	77458625	77460540	-	GXT_22781818	AK311268	GXL_159071	KCTD12	115207	1013	2	9.72e-46	0.81	up	1.35005	-2.11269	-0.104855
chr13	114005250	114018435	-	GXT_22781866	AK309959	GXL_40645	GRTP1	79774	1329	5	0.202	1.15	up	3.24364	-0.120301	-0.216672
chr14	61179885	61189883	-	GXT_22781961	AK308528	GXL_156031	SIX4	51804	2003	4	1.95e-06	0.71	up	1.28048	-0.234751	0.216849
chr14	100761995	100772781	-	GXT_22782016	AK310069	GXL_101118	SLC25A29	123096	626	3	0.0748	0.74	up	1.88536	-0.934238	0.587272
chr14	103986201	103989168	-	GXT_22782033	AK312282	GXL_101282	CKB	1152	1224	8	1.91e-84	1.1	up	3.88059	-3.24877	0.472067
chr14	103985996	103989167	-	GXT_22782050	AK290101	GXL_101282	CKB	1152	1428	8	7.17e-68	1.09	up	3.88059	-3.12833	0.406002
chr14	52471649	52535774	-	GXT_22782080	AK291652	GXL_664139	NID2	22795	4726	22	2.88e-135	1.35	up	1.32956	-0.266463	0.285033
chr15	75012830	75017869	-	GXT_22782126	AK313880	GXL_189898	CYP1A1	1543	1653	7	1.92e-08	3.29	up	1.31399	0.482573	1.17082
chr15	65489069	65503811	-	GXT_22782170	AK313352	GXL_189937	CILP	8483	3707	9	0.397	0.51	up	1.34647	-0.0744864	-1.17409
chr15	93588186	93616892	-	GXT_22782225	AK309814	GXL_189797	RGMA	56963	1889	5	7.31e-09	1.75	up	3.39033	-1.55328	0.720842
chr15	79214117	79237388	-	GXT_22782233	AK309491	GXL_189819	CTSH	1512	2101	13	0.444	0.4	up	1.88736	-0.283532	-0.839845
chr15	79294025	79383081	-	GXT_22782248	AK290135	GXL_189939	RASGRF1	5923	2843	17	1	1.23	up	1.6078	-0.053725	-1.10787
chr15	40580710	40600123	-	GXT_22782285	AK291657	GXL_225488	PLCB2	5330	4016	32	0.38	0.57	up	1.01716	-0.507791	-0.15929
chr15	77906369	77924832	-	GXT_22782291	AK291363	GXL_189980	LINGO1	84894	2055	2	0.687	0.47	up	1.61913	-0.432291	-0.35007
chr16	321253	325868	-	GXT_22782326	AK308972	GXL_75847	RGS11	8786	1064	11	0.158	1.2	up	3.13217	-0.74417	0.721313
chr16	68021409	68027279	-	GXT_22782387	AK315090	GXL_133516	DPEP2	64174	1625	10	1	1.23	up	1.18096	-0.949017	0.774096
chr16	49525186	49891830	-	GXT_22782411	AK314742	GXL_133428	ZNF423	23090	4018	8	2.23e-34	0.82	up	1.08701	-0.709949	0.439196
chr16	31150252	31161415	-	GXT_22782467	AK290310	GXL_133572	PRSS36	146547	2834	15	0.635	0.58	up	1.01716	-0.336832	0.159465
chr17	56598910	56609415	-	GXT_22782561	AK308957	GXL_35918	2004-09-01	5414	952	5	0.108	1.62	up	1.31021	-0.5454	0.587151
chr17	7163693	7165793	-	GXT_22782584	AK313958	GXL_252234	CLDN7	1366	1067	4	6.94e-10	2.04	up	1.38665	-1.49035	0.283232
chr17	67103837	67138035	-	GXT_22782611	AK308431	GXL_35913	ABCA6	23460	2584	18	7.41e-45	2.37	up	1.13141	0.022343	0.822881
chr17	56597787	56609399	-	GXT_22782622	AK315396	GXL_35918	2004-09-01	5414	1455	12	0.00756	1.88	up	1.31021	-0.596185	0.578096
chr17	63526094	63557658	-	GXT_22782624	AK315303	GXL_692649	AXIN2/CCDC46	-2	2739	11	1.18e-29	2.35	up	1.56941	-0.953044	0.118626
chr17	3576833	3599529	-	GXT_22782645	AK307959	GXL_1225460	P2RX5	5026	1828	12	1.88e-118	3.51	up	1.02809	-0.730646	0.17461
chr17	61909964	61919826	-	GXT_22782648	AK307944	GXL_35870	SMARCD2	6603	1800	13	7.23e-24	0.78	up	1.18487	-1.11174	1.62689
chr17	56597787	56606674	-	GXT_22782654	AK315045	GXL_35918	2004-09-01	5414	1731	11	0.0111	1.82	up	1.12955	-0.368928	0.622119
chr17	73754137	73761240	-	GXT_22782681	AK314890	GXL_35971	GALK1	2584	1202	8	7.59e-13	0.64	up	1.61618	-0.852017	0.664224
chr17	41605887	41623267	-	GXT_22782720	AK312934	GXL_36916	ETV4	2118	1542	13	3.09e-36	2.56	up	1.33262	-1.05352	0.510545
chr17	73758839	73761273	-	GXT_22782725	AK310203	GXL_35971	GALK1	2584	1180	4	1.14e-05	0.53	up	1.61618	-0.990296	0.774784
chr17	17398439	17399709	-	GXT_22782741	AK312796	GXL_252155	RASD1	51655	1060	2	3.15e-22	1.28	up	2.99351	-1.1021	0.494699
chr17	71281569	71308133	-	GXT_22782760	AK312536	GXL_35970	CDC42EP4	23580	1285	2	2.35e-06	0.51	up	1.22333	-0.750927	0.12355
chr17	41605705	41623267	-	GXT_22782798	AK290429	GXL_36916	ETV4	2118	1727	13	3.53e-33	2.58	up	1.33262	-1.06216	0.493242
chr17	19287179	19290503	-	GXT_22782827	AK293056	GXL_252097	MFAP4	4239	1399	6	0	2.16	up	1.96336	-0.954379	1.12789
chr17	8044059	8055713	-	GXT_22782881	AK291061	GXL_1225476	PER1/VAMP2	-2	4398	23	0	2.66	up	1.26993	-1.56609	-0.0350357
chr19	13211992	13213538	-	GXT_22783024	AK311530	GXL_3489	LYL1	4066	1547	1	0.829	1.04	up	1.56358	0.794445	-0.332168
chr19	3014572	3028917	-	GXT_22783047	AK308608	GXL_3391	TLE2	7089	969	9	2.82e-14	2.86	up	1.1871	-0.715193	0.999161
chr19	11436074	11450344	-	GXT_22783085	AK313538	GXL_3562	RAB3D	9545	921	5	0.000235	1.44	up	2.23208	-1.06602	0.611995
chr19	2997846	3029011	-	GXT_22783194	AK312285	GXL_3391	TLE2	7089	2344	20	1.49e-64	2.76	up	1.20297	-0.760971	0.887629
chr19	47909488	47922379	-	GXT_22783222	AK289950	GXL_189047	MEIS3	56917	1553	12	6.73e-98	1.83	up	3.07692	-0.725106	0.100907
chr19	58858275	58864829	-	GXT_22783238	AK289417	GXL_73774	A1BG/ZNF497	-2	1627	8	0.031	0.47	up	2.09484	-0.379659	-0.16317
chr19	40885358	40896089	-	GXT_22783266	AK292228	GXL_184401	HIPK4	147746	2267	4	0.798	0.57	up	1.6078	-0.210782	-0.150196
chr19	46093902	46105419	-	GXT_22783329	AK290698	GXL_744406	GPR4/OPA3	-2	2121	2	4.48e-05	4.82	up	1.6078	0.177886	-0.447077
chr1	109888388	109935870	-	GXT_22783679	AK310147	GXL_77769	SORT1	6272	864	8	2.55e-119	1.46	up	1.18801	-0.198652	0.782641
chr1	168664794	168698440	-	GXT_22783856	AK292596	GXL_151350	DPT	1805	1293	6	6.36e-116	3.25	up	2.29192	0.406039	1.05436
chr1	153516097	153518282	-	GXT_22783881	AK292083	GXL_152575	S100A4	6275	513	3	6.59e-19	0.79	up	2.00814	-0.31313	0.189808
chr1	203310548	203320223	-	GXT_22783906	AK291632	GXL_151201	FMOD	2331	2124	3	1.52e-92	1.26	up	1.05718	-0.22376	0.142787
chr1	6324333	6418989	-	GXT_22783910	AK291583	GXL_34797	ACOT7	11332	1398	9	1.57e-12	0.49	up	1.47104	-0.544382	-0.571939
chr20	45188633	45242525	-	GXT_22784000	AK310960	GXL_128287	SLC13A3/TP53RK	-2	1887	12	0.0228	0.77	up	1.85482	0.0880931	-0.689311
chr20	62160889	62168705	-	GXT_22784007	AK315232	GXL_128252	PTK6	5753	1394	8	0.353	1.76	up	1.36283	-0.43908	-1.05216
chr20	35521335	35580179	-	GXT_22784010	AK315169	GXL_122630	SAMHD1	25939	2014	16	0	3.01	up	1.87299	-0.689445	2.63273
chr20	32245251	32262194	-	GXT_22784087	AK291895	GXL_122632	NECAB3	63941	1508	13	0.0158	0.45	up	1.09082	-0.894312	0.0199858
chr21	45649936	45660849	-	GXT_22784112	AK314369	GXL_163641	ICOSLG	23308	1048	6	1	1.17	up	1.53499	-0.191385	-1.0235
chr21	45648540	45660849	-	GXT_22784159	AK290192	GXL_163641	ICOSLG	23308	1435	7	0.776	1.73	up	1.53499	-0.172915	-0.923749
chr22	50704597	50709340	-	GXT_22784181	AK309046	GXL_75102	MAPK11	5600	1579	7	0.198	0.4	up	1.14297	-1.29158	0.231165
chr22	50964199	50968441	-	GXT_22784225	AK314716	GXL_1229390	TYMP	1890	1580	10	4.43e-46	1.21	up	2.05376	-1.31049	0.0221417
chr22	43088896	43117286	-	GXT_22784235	AK312927	GXL_75093	A4GALT	53947	1365	3	4.38e-56	0.87	up	1.48362	-0.682647	0.243911
chr22	38742940	38794878	-	GXT_22784238	AK307225	GXL_744632	CSNK1E	1454	1075	6	0.202	1.01	up	1.23922	0.282067	0.323701
chr22	36587123	36597913	-	GXT_22784245	AK312716	GXL_249689	APOL4	80832	1178	4	0.00451	1.51	up	1.01716	0.337131	0.744009
chr22	24615938	24641047	-	GXT_22784247	AK312401	GXL_249853	GGT5	2687	2115	12	0	5.34	up	3.98401	-1.21104	1.22846
chr22	24108174	24110138	-	GXT_22784262	AK289560	GXL_249787	CHCHD10	400916	526	4	0.0112	0.53	up	2.87527	-0.157094	-1.16553
chr22	24615623	24640892	-	GXT_22784283	AK292006	GXL_249853	GGT5	2687	2275	12	0	5.37	up	4.06874	-1.19018	1.21337
chr22	50703179	50708773	-	GXT_22784285	AK291845	GXL_75102	MAPK11	5600	1345	12	0.0083	0.49	up	1.37984	-1.51929	0.0478478
chr22	36587062	36597835	-	GXT_22784302	AK290777	GXL_249689	APOL4	80832	1161	4	0.00614	1.52	up	1.15311	0.336549	0.749411
chr2	99242029	99347553	-	GXT_22784368	AK314024	GXL_72530	MGAT4A	11320	1882	16	0.569	1.83	up	1.82492	0.543454	0.565215
chr2	208631706	208633722	-	GXT_22784418	AK315338	GXL_482333	FZD5	7855	2017	1	0.0032	0.61	up	1.07751	-3.49927	0.22205
chr2	74588626	74601654	-	GXT_22784477	AK315014	GXL_744659	DCTN1	1639	3594	26	2.11e-21	0.53	up	1.15335	-0.498688	0.129014
chr2	178095513	178129859	-	GXT_22784508	AK314816	GXL_1230619	NFE2L2	4780	2373	5	2.82e-73	0.89	up	0.995169	0.150021	0.160827
chr2	208631667	208633597	-	GXT_22784605	AK290386	GXL_482333	FZD5	7855	1931	1	0.00383	0.61	up	1.05955	-3.12898	0.117213
chr2	239147398	239148679	-	GXT_22784630	AK293111	GXL_88986	HES6	55502	878	4	0.00124	0.87	up	2.26062	-0.780592	-0.520987
chr2	101624079	101676002	-	GXT_22784641	AK292826	GXL_72381	TBC1D8	11138	3391	18	1.02e-125	2.17	up	2.40483	-0.704708	0.691448
chr3	141904546	141944331	-	GXT_22784786	AK313792	GXL_383013	GK5	256356	940	10	3.78e-40	1.94	up	1.15267	-0.00191093	1.75289
chr3	71733833	71803924	-	GXT_22784790	AK313656	GXL_171103	EIF4E3	317649	777	8	0.292	0.75	up	1.53499	0.572487	0.187446
chr3	125831697	125899384	-	GXT_22784827	AK308112	GXL_181790	ALDH1L1	10840	2198	19	0.171	1.49	up	2.005	0.037232	-0.275093
chr3	111842302	111852099	-	GXT_22784840	AK313368	GXL_171129	GCET2	257144	669	6	1	0.52	up	1.18096	0.214892	-0.0463005
chr3	141917699	141944434	-	GXT_22784843	AK310761	GXL_383013	GK5	256356	1103	5	5.42e-58	1.96	up	1.13489	-0.174539	1.83731
chr3	125853919	125899372	-	GXT_22784850	AK307699	GXL_181790	ALDH1L1	10840	2192	13	0.353	1.05	up	2.005	0.239775	-0.232335
chr3	12195015	12200412	-	GXT_22784884	AK313018	GXL_13762	TIMP4	7079	747	5	2.57e-125	4.59	up	1.55431	-0.616644	1.27374
chr3	185393084	185542780	-	GXT_22784936	AK309611	GXL_193591	IGF2BP2	10644	1103	9	9.08e-10	0.64	up	1.34325	0.114977	0.303381
chr3	133669796	133748769	-	GXT_22784938	AK309561	GXL_181866	SLCO2A1	6578	1379	7	0.639	1.06	up	2.07194	-0.536349	0.321348
chr3	15492837	15563277	-	GXT_22784972	AK289688	GXL_744717	COLQ/HACL1	-2	1827	17	0.421	0.54	up	1.3825	-0.0774103	-0.61105
chr3	185363153	185542827	-	GXT_22785049	AK290664	GXL_193591	IGF2BP2	10644	2045	16	1.45e-16	0.6	up	1.32393	0.0451679	0.584546
chr4	9881830	10041834	-	GXT_22785111	AK310895	GXL_125215	SLC2A9	56606	1659	12	0.026	1.33	up	1.3825	-0.0365497	0.241815
chr5	115141130	115152354	-	GXT_22785307	AK314231	GXL_103265	CDO1	1036	863	5	7.1e-14	1.25	up	1.01821	0.288016	0.708559
chr5	180630497	180632156	-	GXT_22785409	AK314872	GXL_45253	TRIM7	81786	712	2	0.0015	3.57	up	2.8221	-1.16417	1.02097
chr5	115150892	115152356	-	GXT_22785498	AK309390	GXL_103265	CDO1	1036	820	2	0.147	1.45	up	1.01689	-0.955755	-0.390124
chr6	170592074	170599569	-	GXT_22785602	AK314234	GXL_826685	DLL1	28514	2510	10	0.0051	1.94	up	1.94072	-0.461572	-1.13825
chr6	170599336	170600166	-	GXT_22785613	AK311474	GXL_826685	DLL1	28514	831	1	0.0517	2.33	up	1.73409	-0.534855	-0.167518
chr6	136977131	137113544	-	GXT_22785690	AK310942	GXL_190836	MAP3K5	4217	2157	11	3.1e-19	1.16	up	1.29917	0.0374642	0.355876
chr6	144262561	144285951	-	GXT_22785704	AK315184	GXL_190717	PLAGL1/HYMAI	-2	1818	4	4.33e-226	1.38	up	1.12748	-0.0356218	0.000263898
chr6	166825784	166837464	-	GXT_22785754	AK307470	GXL_926239	RPS6KA2/RNASET2	-2	1196	6	9.62e-176	1.62	up	1.69949	-0.879537	-0.250945
chr6	32060991	32077090	-	GXT_22785770	AK310080	GXL_1235006	ATF6B	1388	2742	5	2.05e-17	0.95	up	1.93007	-0.785087	1.43849
chr6	46129063	46138585	-	GXT_22785785	AK312790	GXL_40193	ENPP5	59084	1514	4	7.59e-10	2.71	up	2.83451	0.788889	1.5251
chr6	35543612	35656692	-	GXT_22785805	AK312422	GXL_694672	FKBP5	2289	1577	11	0	5.93	up	1.7616	-0.566875	1.72107
chr6	3723132	3751947	-	GXT_22785852	AK289598	GXL_43541	C6orf145	221749	1599	5	4.15e-16	0.47	up	1.76036	-0.454834	0.0878799
chr6	46128500	46138708	-	GXT_22785870	AK292842	GXL_40193	ENPP5	59084	2196	4	2.42e-25	2.92	up	2.83451	0.780101	1.24156
chr7	44259661	44365137	-	GXT_22785992	AK315663	GXL_12450	CAMK2B	816	1629	18	0.248	1.71	up	1.7857	-0.185806	-0.793275
chr7	151265780	151573933	-	GXT_22786065	AK307798	GXL_1236976	PRKAG2	51422	1413	10	1.9e-41	1.46	up	1.1641	-0.395916	0.260231
chr7	44256749	44365095	-	GXT_22786151	AK290148	GXL_12450	CAMK2B	816	2292	21	0.0537	2.08	up	1.7857	-0.191026	-0.800805
chr7	29963290	30008887	-	GXT_22786163	AK289514	GXL_12611	SCRN1	9805	1732	7	2.34e-13	0.54	up	1.50582	0.0112051	-0.308701
chr8	21985599	21988194	-	GXT_22786246	AK308839	GXL_29825	HR	55806	1379	2	5.55e-07	2.21	up	2.86036	-1.71099	0.893208
chr8	57078802	57123859	-	GXT_22786270	AK313663	GXL_30029	PLAG1	5324	1899	4	0.000174	0.91	up	1.01402	0.17012	0.225834
chr8	29194543	29208192	-	GXT_22786321	AK314820	GXL_29907	DUSP4	1846	1582	4	9.73e-94	2.76	up	1.73258	-1.01717	0.497492
chr8	6366057	6420766	-	GXT_22786338	AK310171	GXL_29770	ANGPT2	285	2034	8	0.0219	2.12	up	1.10075	0.148966	0.444594
chr8	141105709	141107269	-	GXT_22786347	AK307073	GXL_695381	LOC100507278/LOC100509233	-2	1561	1	0.863	0.53	up	1.31317	-0.144189	-6.19073
chr8	134050769	134115120	-	GXT_22786359	AK312584	GXL_172724	SLA	6503	1195	8	1	0.77	up	1.12955	-0.382214	-0.0432686
chr8	6360622	6420766	-	GXT_22786360	AK312541	GXL_29770	ANGPT2	285	1802	9	0.0219	2.12	up	1.10075	0.162581	0.440554
chr8	6360239	6420766	-	GXT_22786385	AK290070	GXL_29770	ANGPT2	285	2185	9	0.00579	2.44	up	1.10075	0.155417	0.443702
chr8	41122289	41166988	-	GXT_22786402	AK293090	GXL_29754	SFRP1	6422	1472	4	1.6e-74	1.75	up	2.19737	-0.416161	0.280689
chr8	144648472	144651057	-	GXT_22786416	AK292180	GXL_483860	C8orf73	642475	1789	5	0.321	0.44	up	1.94129	-1.48318	-0.0413823
chr8	37719994	37757012	-	GXT_22786421	AK291781	GXL_29795	RAB11FIP1	80223	2422	5	0.00128	0.81	up	2.0197	-0.307039	0.154553
chr8	11281527	11302878	-	GXT_22786434	AK290704	GXL_384181	FAM167A	83648	1620	3	1.27e-82	2.17	up	1.6078	-0.37031	0.649737
chr9	136028964	136039301	-	GXT_22786453	AK314097	GXL_779769	RALGDS/GBGT1	-2	1325	7	0.0194	0.77	up	2.26565	-0.822684	0.144238
chr9	95219437	95244756	-	GXT_22786498	AK308107	GXL_190069	ASPN	54829	1488	8	2.33e-59	4.29	up	1.29279	0.325727	0.10734
chr9	136028814	136039301	-	GXT_22786520	AK307687	GXL_779769	RALGDS/GBGT1	-2	1512	7	0.00826	0.8	up	2.26565	-0.81457	0.148269
chr9	95177434	95186674	-	GXT_22786526	AK313055	GXL_190231	OMD	4958	1473	3	0	5.43	up	2.94178	-0.148732	2.17129
chr9	140343752	140350939	-	GXT_22786631	AK292030	GXL_12690	NELF	26012	985	11	0	2.26	up	1.47104	-1.60026	1.56706
chr9	136028789	136039301	-	GXT_22786636	AK291498	GXL_779769	RALGDS/GBGT1	-2	1500	7	0.00927	0.78	up	2.26565	-0.815108	0.144804
chr19	18893584	18902114	-	GXT_22786901	AK290595	GXL_184396	COMP	1311	2451	19	0	3.63	up	1.58588	-1.96028	0.755202
chr10	101089115	101125049	+	GXT_22787006	AK308618	GXL_134270	CNNM1	26507	2496	6	0.442	0.86	up	1.10075	-0.0672522	-0.837414
chr10	31608142	31809349	+	GXT_22787024	AK311137	GXL_90522	ZEB1	6935	886	5	0.000618	0.4	up	1.14295	0.395385	0.493047
chr10	94449712	94454525	+	GXT_22787077	AK314891	GXL_248968	HHEX	3087	845	4	0.409	0.81	up	1.93044	0.312025	0.255549
chr10	18429742	18828598	+	GXT_22787088	AK307526	GXL_90449	CACNB2	783	2097	14	8.34e-06	2.93	up	4.38044	0.226927	0.886818
chr10	31608141	31812935	+	GXT_22787090	AK307510	GXL_90522	ZEB1	6935	2745	9	5.23e-11	0.45	up	1.14295	0.389596	0.499397
chr10	31608142	31816192	+	GXT_22787094	AK314683	GXL_90522	ZEB1	6935	3397	9	7.48e-12	0.46	up	1.14295	0.387954	0.491494
chr10	111987241	112044882	+	GXT_22787120	AK307090	GXL_134238	MXI1	4601	917	7	1.96e-09	0.62	up	1.26521	0.173155	2.155
chr10	94449712	94452240	+	GXT_22787153	AK309463	GXL_248968	HHEX	3087	1307	2	0.444	1.08	up	1.93044	0.0780644	0.0819834
chr11	10472247	10506578	+	GXT_22787298	AK311436	GXL_123372	AMPD3	272	980	6	6.83e-05	1.46	up	1.91876	-0.890637	0.489704
chr11	47279521	47290247	+	GXT_22787372	AK313311	GXL_170765	NR1H3	10062	1539	10	0.0158	0.52	up	2.09455	-0.299632	0.343905
chr11	10472489	10527431	+	GXT_22787427	AK313039	GXL_123372	AMPD3	272	2376	15	6.48e-15	1.45	up	1.85941	-1.08467	0.751036
chr11	44587215	44640676	+	GXT_22787465	AK312677	GXL_170777	CD82	3732	978	10	8.31e-58	1.66	up	1.50615	-1.24987	-0.128668
chr11	10472489	10527583	+	GXT_22787519	AK289998	GXL_123372	AMPD3	272	2563	15	2.03e-14	1.45	up	1.85941	-1.08379	0.748313
chr11	111783460	111789574	+	GXT_22787541	AK293041	GXL_1223643	HSPB2	3316	892	3	3.28e-62	1.1	up	1.43093	0.262278	-0.022897
chr11	13984236	14287448	+	GXT_22787587	AK291780	GXL_123201	SPON1	10418	2854	16	0	4.06	up	2.23784	0.522192	0.956079
chr11	94822974	94862805	+	GXT_22787592	AK291673	GXL_38947	ENDOD1	23052	1683	2	1.59e-16	0.68	up	1.08229	-0.429561	0.295124
chr12	66582996	66641951	+	GXT_22787665	AK314040	GXL_779200	IRAK3	11213	1875	12	9.07e-64	3.82	up	1.67293	0.104853	0.63242
chr12	6309535	6345282	+	GXT_22787676	AK308700	GXL_59643	CD9	928	1267	5	9.85e-29	0.62	up	1.22892	-0.727238	0.409067
chr12	123343726	123346803	+	GXT_22787701	AK308538	GXL_103660	HIP1R	9026	1504	10	5.5e-82	1.97	up	1.69949	-1.23763	-0.360541
chr12	6309010	6342428	+	GXT_22787732	AK311020	GXL_59643	CD9	928	969	3	1.79e-27	0.69	up	0.99946	-0.768544	0.39511
chr12	4671370	4721853	+	GXT_22787737	AK308260	GXL_380807	DYRK4	8798	1677	14	0.000666	0.55	up	1.06881	0.048888	0.0702552
chr12	6309533	6346994	+	GXT_22787753	AK315219	GXL_59643	CD9	928	790	8	1.05e-22	0.6	up	1.22892	-0.701171	0.402882
chr12	6898702	6924236	+	GXT_22787771	AK310750	GXL_59650	CD4	920	1056	2	0.72	0.41	up	1.12748	0.0175421	-0.156539
chr12	109611958	109644661	+	GXT_22787813	AK307466	GXL_316635	ACACB	32	1922	14	0.0426	0.77	up	1.12748	-0.0474871	0.718549
chr12	123344058	123346930	+	GXT_22787814	AK307446	GXL_103660	HIP1R	9026	1527	9	6.28e-78	1.97	up	1.7857	-1.2631	-0.356291
chr12	51318794	51324257	+	GXT_22787833	AK307071	GXL_59476	METTL7A	25840	940	3	6e-103	2.87	up	1.20738	-0.459265	1.50974
chr12	6309540	6345222	+	GXT_22787871	AK309527	GXL_59643	CD9	928	956	2	2.39e-14	0.57	up	1.22892	-0.730985	0.408075
chr12	31800094	31821009	+	GXT_22787891	AK290248	GXL_59679	METTL20	254013	1083	4	0.0248	0.71	up	1.7857	0.246789	0.0459534
chr12	10457045	10467708	+	GXT_22787954	AK291506	GXL_59568	KLRD1	3824	1059	7	0.776	1.88	up	2.70479	-0.0778592	1.19396
chr12	15699555	15749158	+	GXT_22787973	AK290982	GXL_59485	PTPRO	5800	1502	14	1.61e-23	3.37	up	1.67565	-0.0349181	1.14183
chr13	99330072	99380707	+	GXT_22788036	AK310205	GXL_691875	AK310205	0	1238	2	0.063	1.18	up	1.01716	-0.182212	-0.0799284
chr13	27131840	27260221	+	GXT_22788055	AK289845	GXL_40655	WASF3	10810	1973	10	3.04e-199	1.66	up	1.21161	-0.159738	0.653055
chr14	105941160	105945990	+	GXT_22788099	AK315757	GXL_925062	CRIP2	1397	667	8	6.76e-19	0.48	up	1.57819	-1.7625	-0.15849
chr14	37131117	37145657	+	GXT_22788137	AK313627	GXL_691976	PAX9	5083	1204	4	1.13e-07	3.44	up	1.07483	0.535479	-0.0313914
chr14	36302207	36401531	+	GXT_22788221	AK309431	GXL_247951	BRMS1L	84312	1201	8	1.66e-05	0.94	up	1.01716	0.454017	0.530304
chr14	61788442	62016743	+	GXT_22788227	AK290183	GXL_247921	PRKCH	5583	2624	14	1.37e-19	2.31	up	2.07405	0.295712	0.395599
chr14	75745531	75748216	+	GXT_22788265	AK291326	GXL_172846	FOS	2353	1387	4	2.13e-79	2.12	up	1.32944	0.276984	0.0728898
chr14	75746346	75748387	+	GXT_22788272	AK290907	GXL_172846	FOS	2353	1496	3	1.02e-84	2.21	up	1.52415	0.331941	0.10421
chr15	41056274	41059547	+	GXT_22788279	AK311872	GXL_4895	GCHFR	2644	360	3	8.56e-05	1.44	up	1.59789	-0.842674	1.29975
chr15	51634143	51676830	+	GXT_22788289	AK308933	GXL_4856	GLDN	342035	1059	4	0.00235	3.26	up	1.02809	0.00142491	0.259314
chr15	84322847	84697801	+	GXT_22788296	AK308845	GXL_230412	ADAMTSL3	57188	5348	28	2.09e-47	1.06	up	1.95994	-0.182578	0.0663394
chr15	76352326	76521462	+	GXT_22788301	AK308676	GXL_230293	C15orf27	123591	1762	11	2.06e-09	5.53	up	2.04611	-0.00778011	0.793036
chr15	41221536	41229726	+	GXT_22788316	AK313831	GXL_4877	DLL4	54567	2385	10	0.776	1.35	up	2.04334	-0.60721	0.839866
chr15	51634071	51676831	+	GXT_22788341	AK310755	GXL_4856	GLDN	342035	1042	3	0.0037	3.2	up	1.02809	-0.000288253	0.259287
chr15	83776399	83805765	+	GXT_22788464	AK292100	GXL_230379	TM6SF1	53346	1488	10	1.44e-11	1.86	up	2.06225	-0.547401	0.887714
chr16	2880305	2882160	+	GXT_22788516	AK311810	GXL_167620	ZG16B	124220	571	4	1.62e-16	4.15	up	2.91525	-1.42803	0.631868
chr16	766427	767817	+	GXT_22788537	AK308711	GXL_692282	METRN	79006	1174	2	2.85e-23	1.58	up	1.60783	-1.32296	0.575709
chr16	57406402	57416944	+	GXT_22788568	AK313806	GXL_98610	CX3CL1	6376	1273	3	0.0781	2.26	up	2.91512	-0.172145	0.597593
chr16	3019544	3022416	+	GXT_22788750	AK291373	GXL_167500	PAQR4	124222	1421	3	2.99e-79	1.71	up	1.43975	-0.9407	-0.271384
chr16	28889881	28915778	+	GXT_22788752	AK291314	GXL_1225326	ATP2A1	487	3412	23	0.0443	0.82	up	1.14004	-0.584791	0.146532
chr17	54671060	54672283	+	GXT_22788798	AK314080	GXL_8764	NOG	9241	1224	1	5.03e-283	2.64	up	1.98453	-1.69184	0.961773
chr17	71161172	71166568	+	GXT_22788817	AK313866	GXL_8666	SSTR2	6752	1458	2	1	0.85	up	1.31399	0.0193741	0.16897
chr17	43325303	43345997	+	GXT_22788822	AK311429	GXL_102630	LOC100133991	100133991	906	3	0.25	1.12	up	2.48566	-1.15489	-0.0117484
chr17	1665311	1680740	+	GXT_22788858	AK315344	GXL_381695	SERPINF1	5176	1362	8	1.01e-93	1.26	up	1.58164	-1.04418	0.465196
chr17	61744379	61771147	+	GXT_22788874	AK308152	GXL_8640	MAP3K3	4215	1419	11	3.79e-17	0.71	up	1.12748	-0.187246	-0.260506
chr17	7284410	7292023	+	GXT_22788897	AK310684	GXL_45802	TNK1	8711	1989	12	0.071	2.61	up	1.12748	-0.0977669	-0.329436
chr17	20492371	20494013	+	GXT_22789016	AK289643	GXL_480819	MEIS3P2	257468	1643	1	0.0195	0.77	up	1.01716	0.607118	-0.0340463
chr17	7942362	7952040	+	GXT_22789035	AK292779	GXL_45947	ALOX15B	247	2300	14	1.22e-36	3.2	up	2.29174	-0.557729	0.661443
chr17	77021745	77044522	+	GXT_22789057	AK292034	GXL_175503	C1QTNF1	114897	1485	4	5.03e-10	0.67	up	1.47061	-0.874232	0.0837136
chr17	71161149	71166673	+	GXT_22789085	AK290745	GXL_8666	SSTR2	6752	1586	2	1	0.85	up	1.31399	0.0202249	0.169003
chr18	77635884	77660184	+	GXT_22789112	AK308622	GXL_47387	KCNG2	26251	1538	2	0.354	0.88	up	1.6078	-0.68855	-0.259487
chr18	11689229	11753870	+	GXT_22789145	AK307260	GXL_47287	GNAL	2774	884	4	0.263	1.98	up	2.08607	0.406235	0.314622
chr19	4909513	4960814	+	GXT_22789200	AK314579	GXL_73897	UHRF1	29128	2546	17	8.37e-10	0.64	up	1.01026	-0.495788	0.186208
chr19	21724564	21738199	+	GXT_22789255	AK308708	GXL_692823	ZNF429	353088	651	3	1	0.4	up	1.15311	0.416214	0.869008
chr19	47835404	47845070	+	GXT_22789264	AK313994	GXL_262160	GPR77	27202	1232	2	0	4.42	up	1.55669	-1.0455	1.42396
chr19	45409053	45410583	+	GXT_22789277	AK308546	GXL_262307	APOE	348	771	2	7.25e-10	4.79	up	1.62795	-0.483706	0.506224
chr19	12902299	12903629	+	GXT_22789288	AK313737	GXL_262474	JUNB	3726	1331	1	4.57e-10	0.42	up	1.04181	-0.288511	-0.0593435
chr19	709101	746814	+	GXT_22789327	AK315168	GXL_73776	PALM	5064	1210	9	9.02e-15	0.54	up	1.08199	-0.691595	-0.0259697
chr19	45409053	45412507	+	GXT_22789354	AK314898	GXL_262307	APOE	348	1023	4	3.23e-173	4.97	up	1.62795	-0.660226	0.536909
chr19	18118981	18123775	+	GXT_22789384	AK314657	GXL_262453	ARRDC2	27106	1363	8	0	3.2	up	3.4695	-0.568408	1.71546
chr19	4909484	4961184	+	GXT_22789398	AK307239	GXL_73897	UHRF1	29128	999	6	1.19e-05	0.96	up	1.07047	-0.499838	0.185686
chr19	18723683	18728719	+	GXT_22789436	AK309384	GXL_262565	TMEM59L	25789	1557	5	1.74e-93	2.48	up	1.43314	-0.570351	0.973758
chr19	49622941	49653513	+	GXT_22789458	AK289757	GXL_31967	PPFIA3	8541	3673	30	0.0738	0.67	up	1.38657	-0.465549	0.115152
chr19	2476125	2477928	+	GXT_22789472	AK293087	GXL_73885	GADD45B	4616	1044	4	5.03e-126	1.53	up	1.31383	-0.807485	0.45037
chr19	30302901	30315082	+	GXT_22789520	AK291549	GXL_262426	CCNE1	898	1814	12	9.58e-18	1.02	up	2.69075	-0.0976373	-0.564646
chr19	17858571	17899155	+	GXT_22789528	AK291410	GXL_262523	FCHO1	23149	2854	28	0.677	0.92	up	1.6379	-0.396989	-0.212069
chr1	160085549	160111112	+	GXT_22789595	AK314296	GXL_925489	ATP1A2	477	3166	23	3.67e-06	3.85	up	2.09998	-0.30686	0.395512
chr1	204042750	204095262	+	GXT_22789625	AK314197	GXL_120859	SOX13	9580	1974	14	3.47e-08	1.18	up	1.43326	-0.612322	0.307955
chr1	53527880	53547833	+	GXT_22789629	AK314096	GXL_47125	PODN	127435	1750	10	1e-58	1.11	up	1.30124	-1.04005	-0.288061
chr1	160098186	160100359	+	GXT_22789642	AK308773	GXL_925489	ATP1A2	477	1038	5	0.045	3.07	up	1.47104	-0.936118	0.864718
chr1	160336861	160340923	+	GXT_22789703	AK313700	GXL_57741	NHLH1	4807	844	2	1	0.52	up	1.42745	0.0298236	0.132867
chr1	225997797	226033048	+	GXT_22789808	AK313436	GXL_19320	EPHX1	2052	1448	9	1.03e-21	0.64	up	1.6126	-0.709299	0.647531
chr1	155100305	155106543	+	GXT_22789866	AK313117	GXL_57614	EFNA1	1942	767	5	0.112	2.36	up	2.4657	-0.328719	0.635061
chr1	35247091	35251176	+	GXT_22789946	AK312890	GXL_47003	GJB3	2707	1127	2	0.484	1.13	up	1.42745	-0.621019	-0.501807
chr1	154378058	154437856	+	GXT_22790002	AK312730	GXL_57713	IL6R	3570	1455	10	5.2e-08	2.02	up	0.998677	-0.805729	0.357345
chr1	113051618	113063131	+	GXT_22790005	AK312696	GXL_925447	WNT2B	7482	1443	5	0.00056	0.87	up	1.57029	-1.45231	0.316314
chr1	21835919	21904141	+	GXT_22790010	AK312667	GXL_59104	ALPL	249	1771	12	8.08e-285	5.14	up	2.26062	-0.883047	-0.0641007
chr1	7740148	7826792	+	GXT_22790032	AK309727	GXL_59091	CAMTA1	23261	2446	12	0.639	1.39	up	1.34591	0.109435	-0.198513
chr1	110693136	110741300	+	GXT_22790119	AK289982	GXL_925441	SLC6A17	388662	2875	12	0.689	0.59	up	1.01716	0.15577	-0.999647
chr1	155100352	155107332	+	GXT_22790139	AK289589	GXL_57614	EFNA1	1942	1443	4	0.0241	1.9	up	2.4657	-0.349585	0.410166
chr1	110009166	110021304	+	GXT_22790142	AK289513	GXL_925438	SYPL2	284612	1621	5	4.06e-12	4.86	up	1.37532	0.222025	0.236376
chr1	110009224	110022686	+	GXT_22790155	AK293082	GXL_925438	SYPL2	284612	1577	6	3.55e-11	3.07	up	1.37532	0.21805	0.243972
chr1	150529445	150533084	+	GXT_22790161	AK293037	GXL_1227339	ADAMTSL4	54507	1858	9	2.83e-119	1.63	up	2.09484	-0.274879	0.646786
chr1	154378055	154437736	+	GXT_22790163	AK293013	GXL_57713	IL6R	3570	1244	9	7.29e-08	2.13	up	0.988176	-0.807094	0.358747
chr1	32042112	32053004	+	GXT_22790169	AK292770	GXL_925402	TINAGL1	64129	1928	12	6.72e-102	1.55	up	1.45943	-1.41935	0.35942
chr1	35258600	35261325	+	GXT_22790228	AK291563	GXL_47140	GJA4	2701	1598	2	0.173	2.53	up	1.12748	-0.592029	-0.611509
chr1	40420822	40435272	+	GXT_22790233	AK291540	GXL_46998	MFSD2A	84879	1768	14	0.00221	0.57	up	1.00228	-0.706754	-0.124264
chr20	30640075	30689322	+	GXT_22790305	AK314335	GXL_132652	HCK	3055	1731	13	0	4.59	up	6.28163	-0.965969	0.471575
chr20	17577343	17588048	+	GXT_22790328	AK308562	GXL_132637	DSTN	11034	845	4	8.56e-64	1.03	up	1.42745	0.329356	0.546499
chr20	30193091	30193897	+	GXT_22790333	AK313786	GXL_132797	ID1	3397	568	2	0	2.19	up	1.30941	-0.602624	0.694632
chr20	60074477	60512275	+	GXT_22790337	AK308345	GXL_81846	CDH4	1002	2928	15	0.00747	0.53	up	1.18096	-0.695131	0.0589135
chr20	59827528	60512001	+	GXT_22790355	AK315192	GXL_81846	CDH4	1002	2793	16	0.015	0.52	up	1.66417	-0.664097	0.00900671
chr20	42295754	42344727	+	GXT_22790379	AK314791	GXL_132726	MYBL2	4605	2273	14	2.92e-05	0.45	up	1.27329	-0.543054	-0.240627
chr20	30640000	30689332	+	GXT_22790429	AK289896	GXL_132652	HCK	3055	1816	13	0	4.61	up	6.26627	-0.962659	0.471761
chr20	30193168	30193946	+	GXT_22790459	AK291152	GXL_132797	ID1	3397	540	2	0	2.19	up	1.31822	-0.608707	0.676721
chr20	30640045	30689652	+	GXT_22790464	AK290928	GXL_132652	HCK	3055	2160	14	0	4.66	up	6.28163	-0.956469	0.469194
chr21	44073889	44192631	+	GXT_22790495	AK314679	GXL_176078	PDE9A	5152	1805	19	0.000185	2.8	up	1.1673	-0.391808	-0.284218
chr21	39628991	39672466	+	GXT_22790512	AK292812	GXL_176086	KCNJ15	3772	1516	3	1.29e-14	1.26	up	1.3825	-0.17758	0.548696
chr22	42177355	42190961	+	GXT_22790543	AK311552	GXL_47689	MEI1	150365	1624	2	0.0491	1.84	up	1.42745	0.0511907	-0.00241615
chr22	42177369	42190227	+	GXT_22790606	AK307341	GXL_47689	MEI1	150365	958	3	0.0965	1.69	up	1.18096	0.105913	0.0503365
chr22	24828087	24837551	+	GXT_22790634	AK289871	GXL_693627	ADORA2A/SPECC1L	-2	1963	4	0.731	0.58	up	1.12748	-0.963466	-1.20002
chr2	48757308	48822441	+	GXT_22790672	AK314464	GXL_693729	GTF2A1L	11036	2303	4	1.85e-203	2.88	up	1.37744	-0.471613	0.921661
chr2	233498267	233546429	+	GXT_22790783	AK315442	GXL_925811	EFHD1	80303	868	4	1.82e-71	4.99	up	3.1679	-0.581568	1.26644
chr2	73868105	73900632	+	GXT_22790940	AK307160	GXL_131968	ALMS1P	200420	1354	4	1	0.8	up	1.69949	0.16576	0.566645
chr2	48757064	49003638	+	GXT_22790972	AK309740	GXL_693729	GTF2A1L	11036	3772	11	1.63e-232	2.89	up	1.09023	-0.0552704	0.61155
chr2	211421326	211542839	+	GXT_22791028	AK289749	GXL_119711	CPS1	1373	4765	38	0.00074	0.48	up	1.34647	0.463801	0.645924
chr2	33661505	33787843	+	GXT_22791051	AK292983	GXL_825622	RASGRP3	25780	2650	19	0.687	0.54	up	1.3825	0.254498	-0.103092
chr2	36923936	36986500	+	GXT_22791082	AK292149	GXL_42138	VIT	5212	997	6	4.74e-69	3.14	up	1.26268	-0.280141	0.727374
chr3	9944538	9957491	+	GXT_22791147	AK314476	GXL_193477	IL17RE	132014	2083	16	2.15e-43	1.45	up	2.15386	-1.47056	0.630209
chr3	38307303	38318956	+	GXT_22791240	AK315301	GXL_169812	SLC22A13	9390	1705	10	1	1.1	up	1.85482	-0.364503	0.430132
chr3	39850405	40299657	+	GXT_22791371	AK312412	GXL_169667	MYRIP	25924	2678	17	5.93e-25	3.78	up	1.59414	-0.0527531	0.714293
chr4	1808024	1809567	+	GXT_22791526	AK308936	GXL_164857	FGFR3	2261	1000	4	9.96e-05	2.79	up	1.01716	-1.13916	0.240156
chr4	156680173	156727561	+	GXT_22791596	AK315199	GXL_175142	GUCY1B3	2983	1980	14	0.00351	1.07	up	1.26044	0.262538	-0.426957
chr4	156680183	156727985	+	GXT_22791606	AK307838	GXL_175142	GUCY1B3	2983	2709	15	0.00251	0.99	up	1.26854	0.264124	-0.440429
chr4	53728484	53731972	+	GXT_22791617	AK314942	GXL_33785	RASL11B	65997	938	4	0.00049	3.13	up	1.40244	-0.191671	0.433939
chr5	126626538	126760473	+	GXT_22791872	AK307919	GXL_6060	MEGF10	84466	2365	14	0.0951	1.62	up	1.95448	0.00675326	0.600711
chr5	133861924	133915164	+	GXT_22791987	AK290471	GXL_27426	PHF15	23338	2583	11	1.68e-20	0.8	up	1.58917	-0.795611	0.0109637
chr5	148521633	148638247	+	GXT_22792002	AK289736	GXL_27402	ABLIM3	22885	2358	22	7.1e-147	1.96	up	1.3362	-0.794756	0.153756
chr5	115298137	115361903	+	GXT_22792043	AK291655	GXL_6087	AQPEP	206338	3239	20	0.000183	2.36	up	1.03837	0.135213	0.196773
chr5	75699080	76003142	+	GXT_22792053	AK291066	GXL_6153	IQGAP2	10788	5023	36	0.689	0.92	up	1.05271	0.336326	0.0621708
chr6	150285121	150291261	+	GXT_22792064	AK316582	GXL_232935	ULBP1	80329	800	4	0.726	0.46	up	1.08736	-0.133485	-0.244138
chr6	124125353	125144671	+	GXT_22792109	AK308927	GXL_383732	NKAIN2	154215	930	8	2.36e-46	4.17	up	1.9656	0.468844	1.18666
chr6	33244945	33246333	+	GXT_22792127	AK315647	GXL_156340	B3GALT4	8705	1389	1	9.51e-08	0.94	up	0.990127	-0.203286	0.495089
chr6	124125316	125144817	+	GXT_22792198	AK310763	GXL_383732	NKAIN2	154215	898	6	4.61e-46	4.22	up	1.84879	0.468507	1.1862
chr6	124125530	125144750	+	GXT_22792271	AK315886	GXL_383732	NKAIN2	154215	995	7	2.05e-41	4.12	up	1.77252	0.469024	1.19206
chr6	124125353	125145046	+	GXT_22792294	AK309802	GXL_383732	NKAIN2	154215	1305	8	1.23e-72	3.76	up	1.9656	0.468471	1.18646
chr6	157963621	158065290	+	GXT_22792325	AK309408	GXL_1235753	ZDHHC14	79683	1149	4	0.0156	1.13	up	1.31317	-0.510083	-0.701061
chr6	124125341	125145392	+	GXT_22792328	AK309385	GXL_383732	NKAIN2	154215	1490	9	2.53e-70	3.77	up	1.91609	0.468304	1.18671
chr6	30850694	30867617	+	GXT_22792413	AK291621	GXL_926176	DDR1	780	3284	17	6.93e-14	0.54	up	1.1673	-1.05913	0.224868
chr7	75932894	75933612	+	GXT_22792490	AK311446	GXL_33669	HSPB1	3315	527	3	6.68e-35	0.65	up	1.1921	-0.59459	0.294549
chr7	30791753	30795467	+	GXT_22792500	AK313832	GXL_744872	AQP1	358	803	3	0.0176	3.87	up	3.85193	-1.17078	0.874709
chr7	79083308	79089085	+	GXT_22792509	AK311103	GXL_1236479	LOC100505881/LOC100505895	-2	762	4	1.74e-54	1.15	up	1.00666	-0.142118	0.304041
chr7	127881333	127894816	+	GXT_22792518	AK313553	GXL_78423	LEP	3952	559	3	5.03e-236	5.66	up	3.89399	-1.26834	0.924808
chr7	142982044	142983922	+	GXT_22792532	AK315170	GXL_49434	TMEM139	135932	790	4	0.569	1.28	up	1.6379	-0.638149	0.266315
chr7	100136848	100162614	+	GXT_22792547	AK314954	GXL_78307	AGFG2	3268	1568	12	1.34e-135	1.83	up	1.57744	-0.396745	1.09428
chr7	29234347	29552351	+	GXT_22792580	AK313021	GXL_779663	CHN2	1124	1618	13	0.113	1.98	up	1.65318	0.264313	0.962375
chr7	30951468	30963244	+	GXT_22792595	AK312656	GXL_744872	AQP1	358	867	4	8.14e-12	1.87	up	1.64611	-1.20903	-0.153383
chr7	70597523	71177424	+	GXT_22792645	AK290036	GXL_33498	WBSCR17	64409	2356	11	0.117	2.38	up	1.12955	-0.286095	-0.52265
chr8	80525707	80577311	+	GXT_22792726	AK309130	GXL_67197	STMN2	11075	1011	5	3.05e-103	5.5	up	3.00887	0.308969	0.756788
chr8	21912418	21927816	+	GXT_22792742	AK308807	GXL_42295	EPB49	2039	997	6	0.813	0.53	up	2.09484	-0.327086	-0.429439
chr8	80523366	80577445	+	GXT_22792760	AK308557	GXL_67197	STMN2	11075	1039	6	7.23e-118	5.6	up	1.30152	0.252906	0.87974
chr8	143808670	143816857	+	GXT_22792761	AK315614	GXL_67202	C8orf55	51337	722	2	0.000788	0.81	up	1	-0.556662	-0.103944
chr8	57124348	57130157	+	GXT_22792837	AK290088	GXL_67161	CHCHD7	79145	614	5	4.47e-11	0.84	up	1.01816	0.0675762	0.194632
chr8	17433942	17500504	+	GXT_22792844	AK289450	GXL_42491	PDGFRL	5157	1767	7	1.71e-110	3.65	up	1.038	-0.343403	0.834984
chr8	80523377	80577552	+	GXT_22792854	AK292737	GXL_67197	STMN2	11075	1037	5	6.35e-128	5.54	up	1.30152	0.250418	0.877793
chr8	69243485	69445869	+	GXT_22792874	AK291436	GXL_67290	C8orf34	116328	1353	7	1.85e-44	4.9	up	2.5246	0.162715	1.18618
chr8	18069731	18080662	+	GXT_22792885	AK290912	GXL_42448	NAT1	9	1744	3	0.000131	0.6	up	1.1673	-0.0462618	0.466483
chr9	100263465	100361980	+	GXT_22792893	AK314533	GXL_15132	TMOD1	7111	1213	10	2.73e-17	5.13	up	2.10565	0.095583	1.6119
chr9	124062108	124094881	+	GXT_22792931	AK315494	GXL_185045	GSN	2934	2381	17	4.89e-198	1.47	up	3.00428	-0.451368	0.283133
chr9	140500155	140509649	+	GXT_22792950	AK308376	GXL_1239001	ARRDC1	92714	1449	7	9.11e-40	1.19	up	2.54448	-0.808404	0.0231441
chr9	125132809	125154667	+	GXT_22792962	AK308222	GXL_184939	PTGS1	5742	1839	11	1.09e-87	2.64	up	1.33535	-0.696704	0.362773
chr9	124062336	124094904	+	GXT_22792979	AK307859	GXL_185045	GSN	2934	2297	17	1.97e-193	1.46	up	3.04369	-0.458331	0.277481
chr9	91606360	91617252	+	GXT_22793039	AK312798	GXL_15176	S1PR3	1903	1535	2	3.59e-48	2.17	up	2.46845	-1.62422	0.423847
chr9	125133331	125154875	+	GXT_22793062	AK290022	GXL_184939	PTGS1	5742	1885	11	4.96e-237	2.73	up	1.18089	-0.678798	0.385473
chr9	87284638	87425886	+	GXT_22793066	AK289904	GXL_317026	NTRK2	4915	2364	13	9.6e-67	2.4	up	1.48713	0.360506	0.446546
chr3	12329424	12475842	+	GXT_22793428	AK290581	GXL_193541	PPARG	5468	1804	8	1.69e-101	3.03	up	2.85639	-0.486302	0.498979
chr3	239327	440831	+	GXT_22793430	AK126878	GXL_694025	CHL1	10752	3960	25	0.0143	2.88	up	1.42745	0.363484	0.489614
chr22	50964181	50968514	-	GXT_22794210	NM_001113755	GXL_1229390	TYMP	1890	1671	10	2.49e-45	1.21	up	2.04041	-1.17774	-0.00267563
chr22	24615622	24641110	-	GXT_22794222	NM_001099781	GXL_249853	GGT5	2687	2497	12	0	5.37	up	3.98401	-1.20937	1.22917
chr22	50964181	50968258	-	GXT_22795668	NM_001113756	GXL_1229390	TYMP	1890	1587	9	1.54e-47	1.17	up	1.89265	-1.43447	-0.0205818
chr22	42334741	42336223	-	GXT_22795680	NM_001110215	GXL_75194	CENPM	79019	541	2	0.0249	0.74	up	2.09484	-1.36378	0.898043
chr2	233743396	233792861	-	GXT_22795707	NM_001114090	GXL_89147	NGEF	25791	2812	13	4.14e-11	0.82	up	1.47104	-0.264529	-0.529178
chr7	139246316	139477693	-	GXT_22796092	NM_022740	GXL_182477	HIPK2	28996	15225	15	0	2.57	up	0.99603	-0.21106	0.309978
chr7	139246316	139477693	-	GXT_22796103	NM_001113239	GXL_182477	HIPK2	28996	15144	15	0	2.57	up	0.99603	-0.211063	0.309981
chr8	6357172	6420784	-	GXT_22796149	NM_001118887	GXL_29770	ANGPT2	285	5267	9	0.267	0.54	up	1.07693	0.152885	0.455243
chr8	6357172	6420784	-	GXT_22796155	NM_001118888	GXL_29770	ANGPT2	285	5114	8	0.316	0.51	up	1.07693	0.152914	0.455252
chr8	57073468	57123859	-	GXT_22796158	NM_001114634	GXL_30029	PLAG1	5324	7233	4	3.87e-15	0.92	up	1.01402	0.157598	0.139663
chr8	57073468	57123859	-	GXT_22796181	NM_001114635	GXL_30029	PLAG1	5324	6874	3	3.91e-15	0.92	up	1.01402	0.15756	0.139679
chr15	29412455	29862927	-	GXT_22796627	NM_015307	GXL_480365	FAM189A1	23359	4707	11	1	0.49	up	1.6078	0.100947	-0.749558
chr15	25923859	26108349	-	GXT_22796630	NM_024490	GXL_225580	ATP10A	57194	5235	21	2.61e-74	1.04	up	1.22903	-0.372703	0.709663
chr1	145074388	145076200	-	GXT_22796960	XM_001724370	GXL_152531	PDE4DIP	9659	1244	2	0.00147	0.95	up	1.13378	-0.390178	0.662543
chr22	24615622	24641110	-	GXT_22798557	NM_001099782	GXL_249853	GGT5	2687	2398	11	0	5.37	up	3.98401	-1.20937	1.22917
chr2	180306709	180610769	-	GXT_22798611	NM_001113397	GXL_241107	ZNF385B	151126	2761	8	0.00151	3.2	up	1.59162	0.358534	0.552149
chr17	16345328	16395480	-	GXT_22799677	NM_001113567	GXL_252210	C17orf76	388341	2785	4	0.0535	1.03	up	1.45943	-0.588371	-0.275913
chr6	24804513	24911195	-	GXT_22800343	NM_014722	GXL_694612	FAM65B	9750	5471	23	6.21e-184	3.51	up	1.44746	0.192261	1.37484
chr8	144648362	144654928	-	GXT_22800603	NM_001100878	GXL_483860	C8orf73	642475	3250	14	0.0785	0.58	up	1.82153	-1.28186	0.036023
chr11	19734881	20143147	+	GXT_22802014	NM_182964	GXL_123166	NAV2	89797	11006	38	0	2.66	up	1.72062	-1.09376	0.659973
chr19	58863336	58866549	+	GXT_22802485	NR_015380	GXL_32051	A1BG-AS1	503538	2130	4	0.000819	0.77	up	1.12748	-0.518804	-0.103161
chr20	61583999	61599949	+	GXT_22802613	NM_022082	GXL_81812	SLC17A9	63910	2592	13	6.19e-26	0.67	up	1.36164	-0.476524	-0.191506
chr18	7567314	8406859	+	GXT_22805384	NM_001105244	GXL_381948	PTPRM	5797	5600	33	3.55e-14	0.49	up	1.04835	0.075599	0.871884
chr12	10457050	10469850	+	GXT_22806520	NM_001114396	GXL_59568	KLRD1	3824	3196	7	0.776	1.88	up	2.70479	-0.0632736	1.13135
chr1	38259774	38267278	+	GXT_22807063	NM_001113482	GXL_316525	MANEAL	149175	2858	4	0.00109	1.03	up	2.33328	-0.685509	0.916777
chr9	131684562	131704320	+	GXT_22807749	NM_001100877	GXL_926498	NUP188/PHYHD1	-2	1182	10	9.36e-07	0.95	up	1.0714	-0.499957	0.276101
chr14	37126773	37147012	+	GXT_22808118	NM_006194	GXL_691976	PAX9	5083	3107	5	2.88e-16	3.7	up	2.45831	0.395595	0.0346188
chr20	13202418	13281297	+	GXT_22808594	NM_080826	GXL_132779	ISM1	140862	2592	6	0	4.15	up	4.35803	-0.500298	1.2311
chr19	17392454	17398454	+	GXT_22809740	NM_152363	GXL_744381	BABAM1/ANKLE1	-2	3217	9	0.0272	1.66	up	1.85482	-0.840677	-0.246086
chr3	39238020	39256163	+	GXT_22810116	XM_001717679	GXL_482439	LOC729454	729454	759	3	6.64e-58	1.17	up	1.12955	0.327009	-0.87339
chr4	2251957	2259743	-	GXT_22810867	NM_001076256	GXL_125159	MXD4	10608	785	4	5.69e-19	0.54	up	2.45831	-0.880779	0.8514
chr1	61743192	61921051	+	GXT_22811187	ENSCAFT00000029929	GXL_779403	NFIA	4774	938	8	2.22e-18	1.71	up	1.47104	-0.592409	2.06368
chr15	69687326	69696161	+	GXT_22811345	ENSCAFT00000038916	GXL_230374	PAQR5	54852	555	4	1.45e-05	1.31	up	1.34647	-0.797609	-0.234016
chr3	121127381	121202370	-	GXT_22811506	XM_545125	GXL_316877	POLQ	10721	1841	12	0.00716	0.93	up	2.16085	0.326952	0.162491
chr3	134077380	134079096	-	GXT_22811554	ENSCAFT00000036548	GXL_181789	AMOTL2	51421	546	3	2.85e-15	0.57	up	1.42745	-1.7923	0.688976
chr3	13663274	13679417	+	GXT_22811594	ENSCAFT00000007096	GXL_193445	FBLN2	2199	1540	10	2.11e-43	0.95	up	1.6078	-1.11021	0.16949
chr19	30303876	30315013	+	GXT_22812172	ENSCAFT00000012181	GXL_262426	CCNE1	898	1451	9	8.93e-12	0.95	up	2.24665	0.0711445	-0.547765
chr19	675177	681702	+	GXT_22812189	ENSCAFT00000035683	GXL_73737	FSTL3	10272	800	6	1.21e-150	1.59	up	1.30152	-1.21205	0.201978
chr19	14141534	14161652	+	GXT_22812203	ENSCAFT00000026151	GXL_692798	IL27RA/RLN3	-2	1453	10	1.11e-59	2.62	up	2.005	-0.96887	0.867456
chr15	84324480	84611529	+	GXT_22812943	ENSECAT00000010564	GXL_230412	ADAMTSL3	57188	2330	17	3.98e-11	0.8	up	2.2729	-0.15961	0.269537
chr12	5672451	6030472	-	GXT_22814566	ENSECAT00000026574	GXL_139890	ANO2	57101	2753	24	5.58e-05	1.81	up	1.12748	0.16642	0.347144
chr16	57549249	57559892	-	GXT_22814648	ENSECAT00000021417	GXL_133515	CCDC102A	92922	795	6	3.89e-10	1.14	up	1.12748	-0.419197	-0.76156
chr17	59557239	59561502	+	GXT_22814753	NM_001030537	GXL_8754	TBX4	9496	1576	3	0.159	0.91	up	1.18096	-0.632241	-0.349299
chr12	110221388	110234509	-	GXT_22814928	ENSGALT00000008270	GXL_66277	TRPV4	59341	1502	10	1.38e-44	1.86	up	1.69949	-0.440417	-0.312518
chr15	41057969	41059545	+	GXT_22815095	ENSMODT00000000275	GXL_4895	GCHFR	2644	269	2	0.000896	1.49	up	2.52208	-0.743884	1.92215
chr10	69902698	69970212	+	GXT_22815550	ENSMODT00000038788	GXL_248961	MYPN	84665	3104	21	0	2.86	up	1.3825	0.169615	-0.021275
chr4	55955035	55984969	-	GXT_22815629	ENSMODT00000011602	GXL_125267	KDR	3791	3389	25	0.729	0.72	up	2.65984	0.470738	-0.2687
chr22	26706661	26773703	+	GXT_22815718	ENSMODT00000032877	GXL_75060	SEZ6L	23544	1472	10	0.568	2.28	up	2.40483	0.236546	-0.747682
chr19	12865365	12868831	+	GXT_22815831	ENSMODT00000008615	GXL_262485	BEST2	54831	1220	7	0.0067	3.07	up	1.12748	-1.20976	0.215863
chr1	11708751	11710133	-	GXT_22816206	ENSMMUT00000003198	GXL_34772	FBXO2	26232	508	4	0.689	0.84	up	2.16085	-0.577952	0.773069
chr1	16531307	16532580	-	GXT_22816222	ENSMMUT00000020222	GXL_34888	ARHGEF19	128272	558	5	7.93e-97	2.48	up	1.03266	-3.90458	0.807088
chr1	161199529	161205769	-	GXT_22816268	ENSMMUT00000045493	GXL_151182	NR1I3	9970	761	7	0.863	0.81	up	1.12955	0.490616	-0.0854413
chr22	51042680	51049207	+	GXT_22817154	ENSMMUT00000043868	GXL_47737	MAPK8IP2	23542	1523	8	0.551	0.8	up	1.47504	-0.361656	0.61329
chr19	38741958	38742979	-	GXT_22817259	ENSMMUT00000038530	GXL_184421	PPP1R14A	94274	163	2	0	3.85	up	1.20784	-1.72171	0.495624
chr19	3273870	3293444	+	GXT_22817300	ENSMMUT00000021760	GXL_73908	CELF5	60680	1185	12	1	0.58	up	1.18096	-0.220177	0.294871
chr2	191373915	191383915	-	GXT_22817410	ENSMMUT00000001615	GXL_693960	TMEM194B	100131211	1050	7	0.0755	0.63	up	1.67565	0.263803	-0.0240586
chr12	50860742	50870466	+	GXT_22817685	XM_001082051	GXL_59516	LARP4	113251	1602	4	0.000151	0.44	up	1.47504	0.44602	0.404085
chr12	52435593	52453285	+	GXT_22817725	ENSMMUT00000046606	GXL_141520	NR4A1	3164	2477	7	3.05e-33	0.8	up	1.18096	-0.989562	-0.351767
chr16	2511122	2514661	+	GXT_22817733	ENSMMUT00000000002	GXL_167505	C16orf59	80178	793	7	0.243	0.49	up	1.038	-1.37308	-0.79133
chr16	4933386	4954041	-	GXT_22817750	ENSMMUT00000025048	GXL_76018	PPL	5493	5089	20	1.05e-101	2.98	up	1.12748	-1.41967	0.6907
chr16	1535940	1537292	-	GXT_22817761	ENSMMUT00000009847	GXL_316695	PTX4	390667	704	2	0.388	2.54	up	1.92972	-0.738955	-2.00179
chr15	93586652	93642458	-	GXT_22819079	XM_510608	GXL_189797	RGMA	56963	3414	6	1.22e-15	1.6	up	2.41677	-0.182649	0.575062
chr6	139561199	139622581	-	GXT_22819482	XM_518873	GXL_190825	TXLNB	167838	4831	12	0.517	0.88	up	3.02672	0.290199	-0.516921
chr21	46823924	46870504	+	GXT_22819593	XM_001143393	GXL_176090	COL18A1	80781	521	4	0.32	1.15	up	1.12748	-0.449613	-0.735309
chr8	28928021	28932845	-	GXT_22819919	XM_001154123	GXL_29779	KIF13B	23303	1206	4	0.0016	0.88	up	1.34647	-0.396784	-1.68863
chr19	8430838	8438770	+	GXT_22820064	ENSPTRT00000019154	GXL_73860	ANGPTL4	51129	903	6	3.21e-133	1.87	up	2.37055	-1.07636	1.04041
chr19	18898300	18899095	-	GXT_22820167	XM_001159303	GXL_184396	COMP	1311	235	2	0	3.58	up	1.44437	-1.72633	0.169381
chr2	128056256	128085661	-	GXT_22820207	XM_001137191	GXL_779529	MAP3K2	10746	10361	11	1.89e-38	0.78	up	2.10763	0.00277375	0.654987
chr16	16135517	16236918	+	GXT_22820620	XM_001145351	GXL_167443	ABCC1	4363	5527	26	3.91e-27	0.6	up	1.18898	-0.378446	0.339527
chr17	42452893	42461249	-	GXT_22820913	ENSRNOT00000036112	GXL_36757	ITGA2B	3674	1954	15	0.829	1.14	up	1.3825	-0.192376	0.920151
chr10	94389951	94392603	+	GXT_22820989	ENSRNOT00000033041	GXL_248845	KIF11	3832	532	2	0.157	0.49	up	1.33909	0.977188	2.50596
chr17	55940337	56032684	-	GXT_23204243	ENST00000407144	GXL_35861	CUEDC1	404093	1888	11	4.14e-25	0.64	up	1.28489	-0.480757	0.409082
chr19	43022668	43032621	-	GXT_23204319	ENST00000377806	GXL_189081	CEACAM1	634	1773	5	0.262	2.79	up	1.92972	-0.700948	0.698868
chr19	43024694	43032621	-	GXT_23204320	ENST00000403136	GXL_189081	CEACAM1	634	1778	4	0.262	2.26	up	1.92972	-0.670556	0.62035
chr22	19833661	19842419	-	GXT_23204398	ENST00000407472	GXL_249688	GNB1L/C22orf29	-2	6523	3	1.59e-60	1.03	up	0.992626	-0.80114	0.28883
chr22	19833669	19842409	-	GXT_23204399	ENST00000405640	GXL_249688	GNB1L/C22orf29	-2	6785	2	6.95e-58	1.01	up	0.985171	-0.801965	0.297843
chr22	24176690	24181193	-	GXT_23204432	ENST00000404056	GXL_249718	DERL3	91319	3115	5	0.00165	2.27	up	2.41677	-0.714174	-0.238462
chr22	38480909	38506652	-	GXT_23204522	ENST00000402500	GXL_249668	BAIAP2L2	80115	2068	15	0.0101	0.64	up	1.92972	-0.116997	-0.536811
chr22	43088127	43090992	-	GXT_23204562	ENST00000401850	GXL_75093	A4GALT	53947	2321	2	6.31e-42	0.98	up	3.4208	-3.73571	0.405328
chr22	43088128	43091639	-	GXT_23204563	ENST00000381278	GXL_75093	A4GALT	53947	1935	2	8.69e-42	0.98	up	3.02672	-2.78606	0.574301
chr16	1413206	1420007	-	GXT_23204747	ENST00000391893	GXL_75920	UNKL	64718	3725	4	5.43e-11	0.53	up	1.18898	0.243988	-0.258105
chr16	1415666	1429687	-	GXT_23204749	ENST00000402641	GXL_75920	UNKL	64718	1606	6	0.000199	0.49	up	1.28157	-0.625694	0.0963823
chr8	144648357	144655141	-	GXT_23204868	ENST00000398882	GXL_483860	C8orf73	642475	3468	14	0.0933	0.56	up	1.42745	-1.31629	0.0355901
chr2	220415464	220436011	-	GXT_23205415	ENST00000404537	GXL_89023	OBSL1	23363	5841	21	7e-50	0.71	up	1.44171	-0.60294	-0.147471
chr2	241418839	241497380	-	GXT_23205422	ENST00000406958	GXL_89018	ANKMY1	51281	2396	17	0.151	0.4	up	1.77689	-0.438614	-0.368484
chr3	10327359	10334631	-	GXT_23205441	ENST00000335542	GXL_13876	GHRL	51738	1425	6	0.729	0.41	up	1.92972	-0.513184	-0.547867
chr19	17392454	17397361	+	GXT_23205623	ENST00000404261	GXL_744381	BABAM1/ANKLE1	-2	2124	9	0.0974	1.85	up	1.85482	-0.835165	-0.188257
chr19	46003207	46005568	+	GXT_23205685	ENST00000401593	GXL_262199	PPM1N	147699	548	4	0.517	0.99	up	1.12748	-0.174129	0.319045
chr19	46003219	46005568	+	GXT_23205687	ENST00000396736	GXL_262199	PPM1N	147699	527	4	0.517	0.99	up	1.12748	-0.176918	0.266517
chr21	33784993	33887707	+	GXT_23205766	ENST00000401402	GXL_163575	C21orf63	59271	1558	7	3.36e-91	2.68	up	1.43251	-0.171782	0.161285
chr22	19702027	19710797	+	GXT_23205781	ENST00000406395	GXL_382759	GP1BB	2812	1973	12	2.56e-15	0.8	up	2.16387	-1.06432	0.242973
chr22	19705955	19710152	+	GXT_23205782	ENST00000383045	GXL_382759	GP1BB	2812	1587	11	2.7e-08	0.66	up	1.17747	-1.29103	0.550216
chr22	30793026	30812964	+	GXT_23205896	ENST00000405717	GXL_825531	SEC14L2/MTFP1	-2	1733	11	2.4e-111	1.77	up	1.18552	-0.225037	0.521504
chr15	81489219	81605102	+	GXT_23206219	ENST00000360547	GXL_230287	IL16	3603	8338	19	3.42e-152	2.07	up	2.02142	-0.380565	0.224496
chr5	133861432	133915165	+	GXT_23206633	ENST00000402835	GXL_27426	PHF15	23338	2798	11	8.03e-20	0.84	up	1.36397	-0.797481	0.0276497
chr7	3341080	4306040	+	GXT_23206764	ENST00000389531	GXL_483430	SDK1	221935	7747	44	2.75e-93	3.07	up	2.13204	-0.120066	0.65263
chr7	116165794	116201233	+	GXT_23206843	ENST00000405348	GXL_78368	CAV1	857	2443	3	1.54e-13	0.42	up	1.16683	0.00165989	0.050529
chr2	10593995	10595678	+	GXT_23206988	ENST00000404616	GXL_744641	ENSG00000217258	0	343	3	0.568	1.64	up	2.10763	-0.991804	0.137144
chr2	36923969	37041883	+	GXT_23207047	ENST00000404084	GXL_42138	VIT	5212	2438	13	2.58e-108	3.82	up	1.30261	-0.136932	0.678881
chr2	36924020	37041576	+	GXT_23207048	ENST00000401530	GXL_42138	VIT	5212	2161	14	3.98e-103	3.7	up	1.32148	-0.137089	0.675785
chr2	48757064	48906742	+	GXT_23207087	ENST00000405008	GXL_693729	GTF2A1L	11036	3821	11	5.24e-231	2.88	up	1.09023	-0.10892	0.7442
chr2	238767536	238820652	+	GXT_23207193	ENST00000404910	GXL_119668	RAMP1	10267	857	3	0	1.91	up	1.90527	-1.47043	-0.164064
chr2	238768619	238820652	+	GXT_23207194	ENST00000403885	GXL_119668	RAMP1	10267	650	3	0	1.91	up	2.29555	-1.47115	-0.158498
chr2	241938255	242034978	+	GXT_23207202	ENST00000405547	GXL_482379	SNED1	25992	7986	30	2.76e-51	0.86	up	2.52802	-0.717672	0.451822
chr15	75011883	75017877	-	GXT_23207542	ENST00000395049	GXL_189898	CYP1A1	1543	2521	6	4.37e-08	2.8	up	1.31399	0.439703	0.71376
chr2	220415464	220436011	-	GXT_23208136	ENST00000265318	GXL_89023	OBSL1	23363	5441	20	3.75e-51	0.72	up	1.44171	-0.60293	-0.147457
chr15	81489219	81582277	+	GXT_23208335	ENST00000394655	GXL_230287	IL16	3603	1741	11	5e-31	2.47	up	2.02142	-0.33813	0.450424
chr15	81489219	81600519	+	GXT_23208336	ENST00000355368	GXL_230287	IL16	3603	4111	19	2.94e-83	2.46	up	2.02142	-0.38408	0.325823
chr18	18822203	19034598	+	GXT_23208416	ENST00000404449	GXL_692705	GREB1L	80000	2527	15	8.66e-47	3.23	up	4.15759	0.67967	1.52958
chr19	17392508	17398455	+	GXT_23208439	ENST00000404085	GXL_744381	BABAM1/ANKLE1	-2	3081	9	0.015	1.81	up	1.85482	-0.847145	-0.247047
chr19	17392686	17398455	+	GXT_23208440	ENST00000394458	GXL_744381	BABAM1/ANKLE1	-2	2875	9	0.0211	1.76	up	1.85482	-0.871861	-0.248653
chr19	41119848	41125379	+	GXT_23208453	ENST00000318809	GXL_262113	LTBP4	8425	482	4	0.00142	0.65	up	1.10597	-0.707047	0.0558225
chr22	23523071	23658142	+	GXT_23208535	ENST00000290956	GXL_75051	BCR	613	3942	20	1.11e-25	0.67	up	1.1677	-0.778975	-0.0530947
chr22	42177739	42195460	+	GXT_23208562	ENST00000403492	GXL_47689	MEI1	150365	874	7	0.00152	3.82	up	1.6379	0.00175002	-0.00464766
chr22	42394792	42424479	+	GXT_23208563	ENST00000328823	GXL_47758	WBP2NL	164684	2255	6	0.484	1.56	up	1.02574	0.0611025	0.14848
chr2	128180865	128186591	+	GXT_23209134	ENST00000402125	GXL_58009	PROC	5624	779	2	0.885	0.73	up	3.07031	-0.754852	0.0218295
chr2	241938255	242013401	+	GXT_23209163	ENST00000401884	GXL_482379	SNED1	25992	4538	27	2.44e-48	0.83	up	2.52802	-0.855471	0.446482
chr10	21074439	21462771	-	GXT_23209307	AK295186	GXL_227930	NEBL	10529	1059	7	3.13e-12	5.97	up	2.71027	0.609246	1.55627
chr11	124622026	124632186	-	GXT_23209381	AK301160	GXL_744151	VSIG2	23584	1013	4	1	0.64	up	3.64262	0.0602078	-0.91241
chr11	111780486	111782540	-	GXT_23209401	AK295498	GXL_161175	CRYAB	1410	981	2	0	2.7	up	1.02423	-0.164875	0.939814
chr11	3109146	3186530	-	GXT_23209446	AK297475	GXL_141014	OSBPL5	114879	2184	18	5.94e-97	1.53	up	1.52617	-0.910957	0.96796
chr11	62369692	62380002	-	GXT_23209471	AK296901	GXL_41525	EML3	256364	2909	22	2.24e-14	0.55	up	0.993422	-0.986978	0.398668
chr11	16810362	16838962	-	GXT_23209492	AK296371	GXL_1222889	PLEKHA7	144100	2391	13	6.09e-15	1.6	up	1.37901	-0.374197	-0.0798284
chr11	3108573	3186517	-	GXT_23209503	AK303205	GXL_141014	OSBPL5	114879	2025	18	3.54e-118	1.61	up	1.51925	-0.885197	0.960184
chr11	16810305	16838818	-	GXT_23209554	AK301465	GXL_1222889	PLEKHA7	144100	2304	13	5.09e-15	1.54	up	2.04334	-0.374497	-0.0852842
chr12	6456850	6486523	-	GXT_23209611	AK304379	GXL_139760	SCNN1A	6337	2360	13	1.25e-23	4.41	up	2.07194	-0.770174	0.687921
chr12	113737282	113770667	-	GXT_23209622	AK293216	GXL_66136	SLC24A6	80024	2040	15	0.00832	0.4	up	1.18096	-0.500154	-0.536544
chr12	15261541	15374351	-	GXT_23209646	AK295343	GXL_139848	RERG	85004	1383	4	4.07e-230	6.73	up	2.07651	0.217481	1.55868
chr12	53200355	53207900	-	GXT_23209680	AK299451	GXL_193774	KRT4	3851	1982	10	0.776	1.45	up	1.42745	0.0950925	2.50576
chr12	54798555	54813004	-	GXT_23209695	AK304696	GXL_193957	ITGA5	3678	1240	12	4.47e-136	1	up	1.17715	-0.230031	0.00795945
chr12	53200684	53207900	-	GXT_23209702	AK299400	GXL_193774	KRT4	3851	1790	9	1	0.8	up	1.42745	0.132748	2.4656
chr12	53200668	53207900	-	GXT_23209752	AK296582	GXL_193774	KRT4	3851	1773	10	1	0.8	up	1.42745	0.122534	2.46573
chr12	6747326	6756577	-	GXT_23209793	AK302290	GXL_744156	LPAR5/ACRBP	-2	1701	10	0.729	0.78	up	1.50582	-0.00445896	-0.0596573
chr13	113979498	114018413	-	GXT_23209901	AK300897	GXL_40645	GRTP1	79774	1446	7	0.0332	1.01	up	3.21828	-0.290338	-0.201954
chr14	75373687	75388911	-	GXT_23209909	AK299846	GXL_101173	RPS6KL1	83694	1932	11	0.157	1.03	up	1.37901	-0.828331	-0.231571
chr14	93406913	93581628	-	GXT_23209922	AK293515	GXL_101233	ITPK1	3705	1315	11	8.22e-18	0.69	up	1.03442	-1.84237	0.12886
chr14	52472173	52505670	-	GXT_23209930	AK298542	GXL_664139	NID2	22795	1963	13	1.29e-144	1.35	up	1.50582	-0.318893	0.366041
chr14	52472012	52535743	-	GXT_23209932	AK300462	GXL_664139	NID2	22795	4047	22	1.22e-163	1.34	up	1.3477	-0.26584	0.275312
chr14	103986004	103989170	-	GXT_23209936	AK298198	GXL_101282	CKB	1152	1319	8	1.72e-77	1.11	up	3.88059	-3.12841	0.427069
chr15	79059175	79103805	-	GXT_23210039	AK299844	GXL_189727	ADAMTS7	11173	1759	11	1.12e-78	1.03	up	1.67931	-0.249414	0.558967
chr15	42738824	42749754	-	GXT_23210134	AK294529	GXL_225427	ZFP106	64397	3191	4	0.000267	0.4	up	1.13623	-0.16094	0.392545
chr16	31150249	31160855	-	GXT_23210223	AK297997	GXL_133572	PRSS36	146547	2778	13	0.635	0.58	up	1.47504	-0.375649	0.175366
chr16	3292027	3306621	-	GXT_23210263	AK298660	GXL_75973	MEFV	4210	2274	11	0.00413	3.15	up	3.27493	-0.0773089	0.589086
chr16	31150303	31161387	-	GXT_23210331	AK301409	GXL_133572	PRSS36	146547	2446	14	0.334	0.99	up	1.33909	-0.336935	0.172886
chr17	19287237	19290503	-	GXT_23210356	AK304528	GXL_252097	MFAP4	4239	1450	6	8.69e-116	2.19	up	1.99518	-0.959911	1.11974
chr17	61909862	61916088	-	GXT_23210360	AK303951	GXL_35870	SMARCD2	6603	1935	13	9.04e-47	0.79	up	2.005	-1.21389	1.88338
chr17	73747675	73761317	-	GXT_23210503	AK303832	GXL_35971	GALK1	2584	1445	9	8.51e-13	0.65	up	1.59482	-1.23277	0.269307
chr17	73758886	73761254	-	GXT_23210505	AK303748	GXL_35971	GALK1	2584	1027	3	3e-05	0.53	up	1.60003	-1.52818	0.74447
chr17	3580976	3582471	-	GXT_23210520	AK303347	GXL_1225460	P2RX5	5026	1496	1	0.0903	1.18	up	1.82153	-1.31785	-0.485269
chr17	8047507	8059678	-	GXT_23210566	AK295410	GXL_1225476	PER1/VAMP2	-2	2981	18	0	2.73	up	1.85059	-1.52288	0.481533
chr17	73823345	73840431	-	GXT_23210613	AK301529	GXL_36007	UNC13D	201294	3649	33	0.529	0.4	up	1.92972	-0.848892	-0.327354
chr17	56597611	56605342	-	GXT_23210618	AK294094	GXL_35918	2004-09-01	5414	1709	12	0.0051	1.95	up	2.78024	-0.697066	0.670837
chr17	17398021	17399709	-	GXT_23210621	AK294073	GXL_252155	RASD1	51655	1404	2	4.45e-39	1.37	up	2.99351	-0.648715	0.706524
chr19	40885179	40896073	-	GXT_23210741	AK302301	GXL_184401	HIPK4	147746	1843	4	0.658	0.66	up	1.92972	-0.209269	-0.14421
chr19	40885390	40896084	-	GXT_23210748	AK301713	GXL_184401	HIPK4	147746	2028	5	0.658	0.74	up	1.92972	-0.21117	-0.15197
chr19	11517412	11529990	-	GXT_23210789	AK298281	GXL_3538	RGL3	57139	970	5	0.0176	3.29	up	1.43314	-0.410214	1.0862
chr19	18893674	18902114	-	GXT_23210813	AK297814	GXL_184396	COMP	1311	2324	20	0	3.62	up	1.59023	-1.9597	0.745321
chr19	18893584	18902114	-	GXT_23210814	AK297798	GXL_184396	COMP	1311	2355	19	0	3.63	up	1.59023	-1.96029	0.755228
chr19	38708031	38720339	-	GXT_23210821	AK297581	GXL_184333	DPF1	8193	1086	7	0.00179	1.1	up	1.41008	-1.07785	-0.161994
chr19	18893584	18902114	-	GXT_23210861	AK296586	GXL_184396	COMP	1311	2292	18	0	3.63	up	1.59023	-1.96026	0.755203
chr19	46056142	46105470	-	GXT_23210866	AK296429	GXL_744406	GPR4/OPA3	-2	1146	2	0.0656	0.42	up	1.92972	-0.167848	-0.075425
chr19	3005539	3029041	-	GXT_23210879	AK303102	GXL_3391	TLE2	7089	1512	15	2.53e-34	2.55	up	1.20297	-0.775752	0.858669
chr19	46273639	46285747	-	GXT_23210890	AK302874	GXL_481200	DMPK	1760	1982	13	7.53e-15	0.47	up	1.18675	-0.513413	-0.0814907
chr19	1498610	1513018	-	GXT_23210913	AK302020	GXL_3451	ADAMTSL5	339366	1736	14	5.91e-06	0.7	up	2.04374	-0.621744	0.123079
chr19	49933243	49945617	-	GXT_23210926	AK294405	GXL_189105	SLC17A7	57030	2237	12	0.573	0.48	up	2.7141	-0.111857	0.0555114
chr19	49933114	49944614	-	GXT_23210935	AK294226	GXL_189105	SLC17A7	57030	2323	12	0.546	0.46	up	1.37901	-0.0791164	-0.289207
chr19	49657043	49658671	-	GXT_23210968	AK300706	GXL_189114	HRC	3270	1541	2	0.776	1.31	up	1.47104	-1.24476	-7.20764
chr19	2997810	3029612	-	GXT_23210982	AK293407	GXL_3391	TLE2	7089	2108	18	6.71e-71	2.74	up	1.15484	-0.777779	1.21572
chr19	11512904	11529990	-	GXT_23210983	AK293404	GXL_3538	RGL3	57139	1455	9	3.18e-06	4.22	up	1.43314	-0.435104	1.01168
chr1	94458738	94477181	-	GXT_23211016	AK301764	GXL_77796	ABCA4	24	1459	13	0.516	0.83	up	1.31317	-0.10575	-0.945058
chr1	236140913	236228502	-	GXT_23211174	AK297234	GXL_106576	NID1	4811	2506	13	1.02e-108	1.23	up	1.79304	-0.278152	0.988819
chr1	203311259	203320223	-	GXT_23211238	AK303866	GXL_151201	FMOD	2331	1372	4	1.72e-72	1.24	up	1.07676	-0.21257	0.404856
chr1	33790323	33833021	-	GXT_23211375	AK294426	GXL_218271	PHC2	1912	2052	9	1.24e-17	0.52	up	1.12748	-0.152777	0.616417
chr1	182353059	182354717	-	GXT_23211383	AK301600	GXL_151294	GLUL	2752	1026	2	0	3.77	up	1.47504	-0.424895	INF
chr1	109856527	109935979	-	GXT_23211387	AK301548	GXL_77769	SORT1	6272	2656	20	5.25e-161	1.41	up	1.27398	-0.191888	0.794613
chr1	183898796	184006611	-	GXT_23211408	AK293973	GXL_151144	GLT25D2	23127	2352	12	2.79e-09	1.04	up	1.3361	-0.339874	0.538258
chr20	3208282	3219836	-	GXT_23211462	AK296760	GXL_122555	SLC4A11	83959	2832	20	4.31e-24	2.72	up	3.46642	-0.904056	0.30061
chr20	3653791	3662705	-	GXT_23211467	AK300429	GXL_122541	ADAM33	80332	1474	10	0.108	1.44	up	3.12422	-0.781918	-0.979624
chr20	35540751	35580111	-	GXT_23211476	AK304795	GXL_122630	SAMHD1	25939	1394	11	0	2.98	up	1.97618	-0.912539	2.89886
chr20	35521054	35580075	-	GXT_23211489	AK304187	GXL_122630	SAMHD1	25939	2121	16	0	2.98	up	1.98721	-0.691558	2.66047
chr20	3653452	3662655	-	GXT_23211496	AK304037	GXL_122541	ADAM33	80332	1722	11	0.167	1.23	up	3.12422	-0.805529	-0.982672
chr20	3208069	3218835	-	GXT_23211502	AK296508	GXL_122555	SLC4A11	83959	3246	20	5.66e-23	2.67	up	2.27165	-0.998785	0.273068
chr20	62160698	62168723	-	GXT_23211537	AK301364	GXL_128252	PTK6	5753	1481	7	0.172	2.14	up	1.36283	-0.454069	-0.900221
chr22	24622030	24641046	-	GXT_23211584	AK304522	GXL_249853	GGT5	2687	1015	4	0	5.47	up	3.98401	-1.19177	1.23518
chr22	50965626	50968441	-	GXT_23211591	AK301194	GXL_1229390	TYMP	1890	1156	5	2.13e-30	1.32	up	2.05376	-1.29774	1.05347
chr22	24615623	24641046	-	GXT_23211593	AK297869	GXL_249853	GGT5	2687	2267	13	0	5.33	up	3.98401	-1.1952	1.23933
chr22	32015439	32034488	-	GXT_23211600	AK298474	GXL_825539	PISD	23761	1349	9	6.17e-74	1.51	up	2.07194	-0.758371	0.181941
chr22	43562923	43567756	-	GXT_23211623	AK304464	GXL_75041	TTLL12	23170	1574	4	1.95e-05	0.42	up	1.42745	-0.554552	-0.574906
chr22	50967114	50968441	-	GXT_23211627	AK298691	GXL_1229390	TYMP	1890	1144	2	1.66e-38	1.23	up	2.05376	-1.35097	0.643557
chr22	24615708	24641050	-	GXT_23211658	AK293683	GXL_249853	GGT5	2687	2120	10	0	5.36	up	3.98401	-1.19972	1.24406
chr2	233743929	233877903	-	GXT_23211729	AK298315	GXL_89147	NGEF	25791	2163	14	2.82e-05	0.77	up	3.23718	-0.170523	-0.329436
chr2	216225870	216257870	-	GXT_23211734	AK300246	GXL_88973	FN1	2335	3720	21	0.0102	0.46	up	1.82153	-0.0563406	0.548916
chr2	233743925	233792861	-	GXT_23211786	AK297390	GXL_89147	NGEF	25791	2283	13	1.53e-06	0.74	up	1.47104	-0.255636	-0.528411
chr2	233743971	233877982	-	GXT_23211938	AK300953	GXL_89147	NGEF	25791	2513	16	2.21e-05	0.7	up	3.27493	-0.170526	-0.330682
chr3	125872034	125899429	-	GXT_23211995	AK294530	GXL_181790	ALDH1L1	10840	1010	6	0.776	0.84	up	2.005	0.332723	0.0850449
chr3	125822416	125899429	-	GXT_23211996	AK294392	GXL_181790	ALDH1L1	10840	2760	21	0.112	2.33	up	2.005	-0.0244108	-0.228784
chr3	48663179	48672874	-	GXT_23212028	AK297695	GXL_694083	SLC26A6	65010	2462	20	1.02e-262	2.54	up	2.17229	-1.23149	1.55081
chr3	48445852	48471594	-	GXT_23212079	AK296776	GXL_13766	PLXNB1	5364	2403	20	3.29e-124	1.95	up	1.78892	-2.02031	1.01066
chr3	69026162	69050801	-	GXT_23212162	AK294101	GXL_171058	C3orf64	285203	1507	10	1.73e-05	0.48	up	2.10763	0.150039	0.684189
chr4	40817444	40859143	-	GXT_23212188	AK299800	GXL_125328	APBB2	323	1558	7	8.14e-94	1.2	up	1.33909	-0.102414	0.220337
chr4	47644860	47840123	-	GXT_23212189	AK304466	GXL_125298	CORIN	10699	2417	14	0	5.58	up	2.92387	-0.566076	0.664891
chr4	82010751	82074878	-	GXT_23212261	AK296979	GXL_220997	PRKG2	5593	1491	13	1	1.01	up	3.02672	0.501239	0.525194
chr4	47597677	47840089	-	GXT_23212265	AK304038	GXL_125298	CORIN	10699	3112	21	0	5.72	up	3.01447	-0.539749	0.582257
chr5	127663991	127873514	-	GXT_23212356	AK300440	GXL_103171	FBN2	2201	4987	33	0	4.16	up	2.85326	-0.216722	1.51123
chr5	138727641	138729130	-	GXT_23212438	AK303170	GXL_483094	LOC389333	389333	1490	1	0.00242	1.3	up	2.48566	-0.975729	-0.344168
chr6	46128731	46138708	-	GXT_23212533	AK295192	GXL_40193	ENPP5	59084	1674	4	1.44e-15	3.24	up	2.83451	0.777217	1.37704
chr6	41652310	41703982	-	GXT_23212543	AK298390	GXL_40059	TFEB	7942	1579	9	8.18e-06	0.96	up	1.87226	-1.04083	-0.160632
chr6	41904593	42016414	-	GXT_23212624	AK303452	GXL_40110	CCND3	896	932	3	1.37e-37	1.09	up	3.25803	-1.28265	0.777763
chr6	31831231	31845448	-	GXT_23212700	AK300550	GXL_383631	SLC44A4	80736	2375	21	0.484	1.06	up	1.47104	-0.305	-0.184088
chr7	128032904	128045996	-	GXT_23212708	AK293413	GXL_182345	IMPDH1	3614	1765	14	2.2e-15	0.63	up	1.5103	-0.449681	-0.195407
chr7	128032793	128045996	-	GXT_23212714	AK297943	GXL_182345	IMPDH1	3614	1891	14	8.69e-23	0.61	up	1.5103	-0.454784	-0.194644
chr7	75167434	75368259	-	GXT_23212744	AK304738	GXL_97794	HIP1	3092	3041	29	2.38e-181	2.13	up	1.45323	-0.553438	0.281805
chr7	29963528	30029905	-	GXT_23212809	AK295172	GXL_12611	SCRN1	9805	1399	8	2.14e-13	0.53	up	1.01879	0.0355353	0.082133
chr7	158433705	158457461	-	GXT_23212817	AK295057	GXL_35025	NCAPG2	54892	2290	14	8.82e-13	0.66	up	1.12748	0.188931	0.573911
chr7	29963264	30009545	-	GXT_23212821	AK294891	GXL_12611	SCRN1	9805	1094	5	1.24e-10	0.55	up	1.18085	0.0179162	-0.301586
chr7	107789932	107816987	-	GXT_23212845	AK294195	GXL_182395	NRCAM	4897	994	4	3.62e-22	3.05	up	1.31317	0.432934	-0.0492739
chr8	57078658	57123859	-	GXT_23212933	AK296933	GXL_30029	PLAG1	5324	1684	3	6.96e-05	0.96	up	1.01545	0.169918	0.226048
chr9	140343499	140351909	-	GXT_23213003	AK303703	GXL_12690	NELF	26012	1294	12	0	2.18	up	3.47062	-1.32276	1.40129
chr9	140343791	140351951	-	GXT_23213015	AK294320	GXL_12690	NELF	26012	921	11	2.07e-168	2.28	up	3.5901	-1.47547	1.39642
chr9	84199056	84303273	-	GXT_23213060	AK304565	GXL_31888	TLE1	7088	1883	16	0.00829	0.61	up	1.05949	-0.744507	0.0997665
chr9	95219296	95244654	-	GXT_23213064	AK304501	GXL_190069	ASPN	54829	1294	6	3.4e-40	3.73	up	1.37984	0.328178	0.0958826
chr10	31608141	31816549	+	GXT_23213395	AK299541	GXL_90522	ZEB1	6935	2314	5	9.97e-13	0.5	up	1.14295	0.390203	0.4915
chr10	101089688	101151296	+	GXT_23213438	AK296545	GXL_134270	CNNM1	26507	2399	12	0.272	0.99	up	1.58742	-0.109257	-0.383369
chr10	31608151	31816320	+	GXT_23213516	AK300830	GXL_90522	ZEB1	6935	3315	8	2.2e-15	0.49	up	1.14232	0.390303	0.490096
chr11	65407343	65418351	+	GXT_23213544	AK303551	GXL_38989	SIPA1	6494	3229	17	8.38e-13	0.68	up	3.23718	-0.664735	-0.0831347
chr11	1462029	1482491	+	GXT_23213573	AK297211	GXL_123154	BRSK2	9024	2118	17	0.458	0.72	up	1.47504	-1.06773	0.214211
chr11	292076	295277	+	GXT_23213702	AK296137	GXL_123127	ATHL1	80162	1736	10	2.42e-95	1.83	up	2.48278	-1.2352	0.229082
chr11	118478348	118502754	+	GXT_23213716	AK295819	GXL_174035	PHLDB1	23187	1318	7	1.72e-21	0.69	up	1.53076	-0.816178	-0.2017
chr11	67183149	67192708	+	GXT_23213735	AK295331	GXL_664114	CARNS1	57571	2369	5	0.474	0.86	up	2.48278	-1.10989	0.172643
chr11	94277006	94349730	+	GXT_23213790	AK293616	GXL_744144	FUT4/PIWIL4	-2	1901	14	0.000148	1.33	up	1.37525	0.146993	0.0296305
chr11	1848709	1857514	+	GXT_23213795	AK293395	GXL_123160	SYT8	90019	991	5	4.41e-05	4.86	up	2.98177	-1.11155	0.49745
chr12	52301288	52314759	+	GXT_23213832	AK298493	GXL_479861	ACVRL1	94	904	7	0.353	0.54	up	1.60003	-0.736141	-0.23449
chr12	124232212	124242832	+	GXT_23213847	AK298778	GXL_103588	ATP6V0A2	23545	1161	7	2.24e-06	0.71	up	1.42745	-0.14833	1.64789
chr12	66583037	66642153	+	GXT_23213848	AK298645	GXL_779200	IRAK3	11213	1853	11	8.71e-67	3.67	up	1.69029	0.10532	0.637288
chr12	6309566	6347408	+	GXT_23213865	AK298431	GXL_59643	CD9	928	916	7	7.56e-41	0.68	up	1.24258	-0.700353	0.403494
chr12	123320028	123341931	+	GXT_23213867	AK298387	GXL_103660	HIP1R	9026	2055	18	3.31e-70	1.82	up	1.19912	-1.4404	0.700051
chr12	52416616	52452833	+	GXT_23213904	AK297526	GXL_141520	NR4A1	3164	2132	8	4.5e-19	0.77	up	1.85482	-0.773293	-0.552785
chr12	6309566	6342594	+	GXT_23213920	AK296894	GXL_59643	CD9	928	1072	3	2.04e-20	0.62	up	1.24258	-0.761611	0.415051
chr12	6309539	6344902	+	GXT_23213935	AK296332	GXL_59643	CD9	928	983	5	2.97e-24	0.62	up	1.23147	-0.730514	0.409701
chr12	123344029	123346537	+	GXT_23213968	AK295389	GXL_103660	HIP1R	9026	1093	10	9.62e-116	2.01	up	2.02142	-1.14515	-0.291673
chr12	51318803	51324106	+	GXT_23214028	AK293356	GXL_59476	METTL7A	25840	720	3	1.32e-129	2.85	up	1.20738	-0.473672	1.5237
chr14	64680898	64692336	+	GXT_23214152	AK297874	GXL_247711	SYNE2	23224	1777	11	1.78e-32	2.01	up	1.42745	-0.582535	-0.365146
chr14	75745531	75748339	+	GXT_23214173	AK298659	GXL_172846	FOS	2353	1402	3	7.18e-78	2.09	up	1.32944	0.241973	0.062763
chr15	83776435	83805921	+	GXT_23214358	AK295568	GXL_230379	TM6SF1	53346	1608	10	1.44e-17	1.78	up	2.06225	-0.5409	0.892713
chr15	41862795	41870790	+	GXT_23214359	AK295496	GXL_5002	TYRO3	7301	1513	8	1.61e-07	0.78	up	1.3825	-0.427491	0.398459
chr16	3021045	3021983	+	GXT_23214575	AK295348	GXL_167500	PAQR4	124222	803	2	8.1e-25	1.84	up	1.18089	-1.0495	-0.171316
chr16	3014276	3018380	+	GXT_23214597	AK301953	GXL_167456	KREMEN2	79412	1877	9	0.0719	1.35	up	1.92972	-0.121887	-0.453425
chr16	777246	779185	+	GXT_23214644	AK293575	GXL_167495	HAGHL	84264	1043	7	0.00223	1.07	up	2.37055	-1.12282	0.275347
chr16	15489636	15502296	+	GXT_23214650	AK293380	GXL_167582	MPV17L	255027	1037	4	0.63	0.72	up	2.48278	-0.463785	0.433697
chr17	61562207	61574799	+	GXT_23214672	AK302019	GXL_8804	ACE	1636	1881	12	5.53e-05	0.6	up	1.82153	-0.338609	-0.772496
chr17	61562207	61574866	+	GXT_23214673	AK301988	GXL_8804	ACE	1636	2237	13	5.58e-05	0.56	up	1.82153	-0.341706	-0.856038
chr17	7942374	7950975	+	GXT_23214683	AK300554	GXL_45947	ALOX15B	247	1755	12	7.59e-45	3.07	up	2.29174	-0.605815	0.665443
chr17	7942352	7952162	+	GXT_23214688	AK298095	GXL_45947	ALOX15B	247	2396	14	4.34e-35	3.22	up	2.29174	-0.547658	0.660897
chr17	48669372	48704209	+	GXT_23214813	AK296513	GXL_8620	CACNA1G	8913	4055	23	5.28e-09	4.13	up	1.42745	-0.584442	0.0102438
chr18	7567816	8406628	+	GXT_23214964	AK303652	GXL_381948	PTPRM	5797	2654	17	6.75e-08	0.44	up	1.423	0.0769067	0.872529
chr18	11689184	11881289	+	GXT_23214969	AK295088	GXL_47287	GNAL	2774	1493	13	0.0236	1.9	up	2.08607	0.319428	0.596079
chr18	10454627	10488342	+	GXT_23215010	AK300743	GXL_47342	APCDD1	147495	2010	6	2.82e-22	3.05	up	1.5313	0.250348	-0.0801853
chr19	55591760	55599057	+	GXT_23215024	AK301615	GXL_31988	EPS8L1	54869	1407	9	0.636	0.58	up	2.48278	-0.258981	-0.116516
chr19	17392728	17397731	+	GXT_23215074	AK299977	GXL_744381	BABAM1/ANKLE1	-2	2003	8	0.00714	2.59	up	1.85482	-0.89694	-0.240118
chr19	17392454	17397314	+	GXT_23215173	AK303628	GXL_744381	BABAM1/ANKLE1	-2	1821	8	0.0246	2.43	up	1.85482	-0.835348	-0.187834
chr19	4909510	4961182	+	GXT_23215181	AK303361	GXL_73897	UHRF1	29128	1858	12	1.02e-05	0.81	up	1.01547	-0.500385	0.185822
chr19	8429040	8439172	+	GXT_23215187	AK303269	GXL_73860	ANGPTL4	51129	1719	8	1.04e-197	1.79	up	1.29798	-0.93213	0.793536
chr19	859664	863451	+	GXT_23215286	AK300963	GXL_73958	CFD	1675	1001	5	0	5.53	up	3.23249	-1.59508	1.23085
chr1	32042578	32051869	+	GXT_23215342	AK301070	GXL_925402	TINAGL1	64129	1731	9	4.66e-63	1.5	up	1.06881	-1.50481	0.298349
chr1	32042116	32053288	+	GXT_23215361	AK298382	GXL_925402	TINAGL1	64129	2115	11	2.39e-94	1.56	up	1.45943	-1.41623	0.312881
chr1	32042139	32050635	+	GXT_23215365	AK298038	GXL_925402	TINAGL1	64129	1083	5	5.57e-32	1.46	up	1.45943	-1.39929	0.340213
chr1	32042116	32046561	+	GXT_23215379	AK296322	GXL_925402	TINAGL1	64129	1143	4	2.02e-24	1.52	up	1.45943	-1.14187	0.286219
chr1	160098186	160111248	+	GXT_23215383	AK295729	GXL_925489	ATP1A2	477	2308	16	6.3e-06	3.33	up	1.47104	-0.544771	1.00359
chr1	40420820	40435430	+	GXT_23215477	AK297991	GXL_46998	MFSD2A	84879	1811	14	0.00373	0.53	up	0.99778	-0.705052	-0.122427
chr1	204042243	204095361	+	GXT_23215486	AK304801	GXL_120859	SOX13	9580	1999	14	1.51e-10	1.3	up	1.29692	-0.614993	0.311701
chr1	145439347	145441230	+	GXT_23215489	AK304670	GXL_228284	TXNIP	10628	1184	7	0	1.77	up	1.59094	-0.402414	1.20549
chr1	53527885	53550584	+	GXT_23215496	AK299375	GXL_47125	PODN	127435	2667	13	8.7e-102	1.1	up	1.30124	-1.12892	-0.302176
chr1	65130349	65157448	+	GXT_23215498	AK299361	GXL_46933	CACHD1	57685	1824	13	4.21e-18	1.06	up	1.33909	0.0262324	0.386788
chr1	61548239	61921054	+	GXT_23215499	AK299356	GXL_779403	NFIA	4774	1817	11	4.22e-24	1.76	up	1.09002	-0.462189	1.59383
chr1	53527885	53550738	+	GXT_23215522	AK304599	GXL_47125	PODN	127435	2077	8	5.76e-50	1.12	up	1.30124	-1.12975	-0.303832
chr1	145549244	145561166	+	GXT_23215583	AK296861	GXL_57658	ANKRD35	148741	869	9	0.656	0.59	up	1.93654	-0.462295	0.572501
chr1	53527885	53551165	+	GXT_23215604	AK296649	GXL_47125	PODN	127435	3057	12	3.92e-77	1.13	up	1.30124	-1.13419	-0.319756
chr1	110009180	110022410	+	GXT_23215688	AK302566	GXL_925438	SYPL2	284612	1153	5	2.5e-08	3.07	up	1.40714	0.216619	0.243901
chr1	92634415	92649709	+	GXT_23215707	AK302496	GXL_744466	KIAA1107	23285	3766	7	0.0837	0.47	up	1.50582	0.524508	1.02194
chr1	95292995	95356760	+	GXT_23215709	AK302381	GXL_228180	SLC44A3	126969	1443	12	0.715	0.49	up	1.3825	0.222515	-0.0381
chr1	7732054	7826680	+	GXT_23215727	AK302088	GXL_59091	CAMTA1	23261	2322	15	0.639	1.39	up	1.12955	0.0436727	-0.183852
chr1	155006282	155023406	+	GXT_23215741	AK301935	GXL_925479	ADAM15/DCST1	-2	2010	16	0.0361	1.78	up	1.12748	-0.38715	0.136677
chr1	155006305	155023406	+	GXT_23215745	AK301876	GXL_925479	ADAM15/DCST1	-2	2199	16	0.0361	1.78	up	1.12748	-0.387898	0.13648
chr1	145549227	145568521	+	GXT_23215753	AK294308	GXL_57658	ANKRD35	148741	3069	12	2.26e-11	0.87	up	1.93654	-0.395956	0.583991
chr1	40420817	40435273	+	GXT_23215764	AK301533	GXL_46998	MFSD2A	84879	1514	12	0.00306	0.57	up	0.99778	-0.711194	-0.118612
chr1	38261080	38266120	+	GXT_23215786	AK301399	GXL_316525	MANEAL	149175	1294	4	0.127	0.7	up	1.12955	-0.73655	1.32077
chr1	145438490	145442130	+	GXT_23215803	AK301203	GXL_228284	TXNIP	10628	1573	4	1.54e-200	1.79	up	1.0252	-0.372855	1.19494
chr1	145438916	145441508	+	GXT_23215805	AK301148	GXL_228284	TXNIP	10628	1353	8	8.84e-185	1.75	up	1.38716	-0.383322	1.19258
chr1	53527881	53550568	+	GXT_23215816	AK300847	GXL_47125	PODN	127435	1507	6	1.84e-64	1.2	up	1.30124	-1.12892	-0.304932
chr20	61584476	61598663	+	GXT_23215887	AK298503	GXL_81812	SLC17A9	63910	1816	12	3.37e-13	0.71	up	1.53176	-0.49263	-0.18095
chr20	30640045	30689463	+	GXT_23215933	AK298726	GXL_132652	HCK	3055	1969	14	0	4.65	up	6.60356	-0.960847	0.471669
chr20	54987449	55034060	+	GXT_23215955	AK295613	GXL_132803	CASS4	57091	2522	6	0.902	0.41	up	3.23718	-0.034734	-0.813562
chr21	44073896	44195537	+	GXT_23216009	AK294112	GXL_176078	PDE9A	5152	1616	17	0.000297	2.74	up	1.1673	-0.384009	-0.2883
chr22	19702118	19710241	+	GXT_23216096	AK295940	GXL_382759	GP1BB	2812	1337	12	2.5e-08	0.7	up	2.16387	-1.05381	0.236955
chr22	45898763	45959233	+	GXT_23216134	AK300806	GXL_47751	FBLN1	2192	2242	15	0	2.74	up	2.07227	-1.40854	0.635252
chr2	7057586	7180361	+	GXT_23216168	AK293854	GXL_42186	RNF144A	9781	1446	8	5.67e-06	1.87	up	1.60612	-0.352023	1.07544
chr2	233497977	233546545	+	GXT_23216172	AK293581	GXL_925811	EFHD1	80303	1002	4	1.1e-77	5.27	up	3.07333	-0.583443	1.29321
chr2	137523115	137872734	+	GXT_23216229	AK299929	GXL_482238	THSD7B	80731	1537	6	1	1.33	up	1.09672	0.28972	0.676916
chr2	47635570	47710360	+	GXT_23216238	AK299667	GXL_42284	MSH2	4436	2538	15	1.23e-06	0.53	up	1.47504	0.249961	0.333573
chr2	36923850	37032645	+	GXT_23216254	AK299426	GXL_42138	VIT	5212	1003	9	1.03e-63	3.42	up	1.19172	-0.127143	0.686586
chr2	113954919	113959298	+	GXT_23216421	AK294268	GXL_1230222	PSD4	23550	1310	5	4.34e-11	1.65	up	1.53499	-0.521543	-0.867221
chr2	201450591	201499638	+	GXT_23216448	AK301052	GXL_316815	AOX1	316	2587	21	0	5.1	up	1.15525	-0.50455	1.36399
chr3	9944532	9953222	+	GXT_23216572	AK298025	GXL_193477	IL17RE	132014	952	8	1.03e-15	1.53	up	2.15386	-1.54087	0.577926
chr3	9944546	9957282	+	GXT_23216586	AK297697	GXL_193477	IL17RE	132014	1939	16	5.61e-22	1.47	up	2.15386	-1.47313	0.667364
chr3	32023266	32033120	+	GXT_23216732	AK294003	GXL_482422	ZNF860	344787	3098	2	0.00325	1.26	up	1.32638	-0.129334	0.0202251
chr3	195943406	195954436	+	GXT_23216748	AK300996	GXL_232698	OSTalpha	200931	912	3	1	0.43	up	2.10763	-0.371928	-0.303458
chr5	148691717	148719772	+	GXT_23216924	AK303314	GXL_27441	AFAP1L1	134265	1517	11	2.79e-112	3.89	up	1.18096	-0.725586	0.271905
chr5	32098614	32109189	+	GXT_23217074	AK294741	GXL_45303	PDZD2	23037	1377	3	0.262	2.81	up	1.47504	0.0185235	-0.0411117
chr6	7541905	7586300	+	GXT_23217231	AK304182	GXL_156154	DSP	1832	4487	24	3.64e-21	0.48	up	1.14911	0.213532	0.124579
chr6	7541854	7579867	+	GXT_23217252	AK296756	GXL_156154	DSP	1832	2989	21	8.91e-18	0.49	up	1.10831	0.180147	0.142185
chr6	7541851	7575028	+	GXT_23217331	AK301676	GXL_156154	DSP	1832	1961	15	4.04e-11	0.42	up	1.1073	0.159211	0.135737
chr6	108977616	109001408	+	GXT_23217347	AK301304	GXL_664367	FOXO3	2309	1940	3	1.1e-10	0.76	up	2.3429	-0.157961	0.723214
chr6	7726332	7880740	+	GXT_23217373	AK300628	GXL_156258	BMP6	654	1846	8	0	6.3	up	2.28564	-1.20453	1.20206
chr7	30951468	30963694	+	GXT_23217419	AK298313	GXL_744872	AQP1	358	1131	5	1.08e-08	1.42	up	1.64611	-1.21918	-0.159035
chr7	30951468	30963847	+	GXT_23217428	AK298091	GXL_744872	AQP1	358	1427	5	2.44e-15	1.51	up	1.64611	-1.21539	-0.162145
chr7	30951468	30963430	+	GXT_23217446	AK304684	GXL_744872	AQP1	358	960	5	1.62e-08	1.63	up	1.64611	-1.21885	-0.154389
chr7	30951471	30963790	+	GXT_23217587	AK301351	GXL_744872	AQP1	358	1074	4	1.78e-07	1.32	up	1.64611	-1.21472	-0.165497
chr7	30951468	30963815	+	GXT_23217598	AK300995	GXL_744872	AQP1	358	1303	5	2.04e-10	1.42	up	1.64611	-1.21562	-0.166289
chr8	38586100	38705887	+	GXT_23217625	AK304774	GXL_1237350	TACC1	6867	1463	11	1.45e-31	0.91	up	3.06003	-0.901884	0.262458
chr8	38586105	38705633	+	GXT_23217627	AK304507	GXL_1237350	TACC1	6867	2635	15	9.29e-47	0.97	up	3.06003	-0.903479	0.264109
chr8	38586102	38710144	+	GXT_23217630	AK303596	GXL_1237350	TACC1	6867	2434	8	1.14e-118	1.11	up	3.06003	-0.8753	0.263553
chr8	38586102	38705828	+	GXT_23217647	AK295071	GXL_1237350	TACC1	6867	2632	13	5.4e-42	0.99	up	3.06003	-0.90232	0.262405
chr8	22409440	22424207	+	GXT_23217697	AK303950	GXL_42482	SORBS3	10174	1228	13	2.53e-23	0.82	up	1.63877	-1.07578	0.268938
chr8	48566650	48648225	+	GXT_23217753	AK301677	GXL_42324	KIAA0146	23514	1479	11	1.66e-13	0.64	up	1.12748	-0.13283	1.12611
chr8	143808668	143817367	+	GXT_23217755	AK301564	GXL_67202	C8orf55	51337	1075	2	9.65e-07	0.78	up	1	-0.624742	-0.104412
chr8	22411961	22432561	+	GXT_23217773	AK301196	GXL_42482	SORBS3	10174	2867	19	1.93e-17	0.47	up	3.75374	-1.0436	0.232007
chr9	125132824	125154933	+	GXT_23217824	AK295221	GXL_184939	PTGS1	5742	2312	12	4.65e-234	2.72	up	1.37289	-0.683773	0.359116
chr9	87287002	87425978	+	GXT_23217826	AK294285	GXL_317026	NTRK2	4915	1791	12	2.74e-31	2.52	up	1.39378	0.396422	0.489184
chr9	139780968	139820668	+	GXT_23217827	AK298370	GXL_185018	TRAF2	7186	1842	11	0.0172	0.4	up	1.1999	-0.409261	-0.441904
chr9	139780968	139820570	+	GXT_23217916	AK294607	GXL_185018	TRAF2	7186	1639	11	0.0226	0.41	up	1.1999	-0.415083	-0.447311
chr11	2904448	2906995	-	GXT_23218166	NM_001122630	GXL_141073	CDKN1C	1028	1763	4	3.99e-68	5.68	up	2.45723	-0.858149	1.17209
chr11	2150347	2162341	-	GXT_23218167	NM_001127598	GXL_479536	IGF2	3481	4839	5	0	5.35	up	4.38052	-3.46039	2.15999
chr1	20990507	21044317	-	GXT_23218208	NM_001122819	GXL_34960	KIF17	57576	3775	15	0.0125	1.01	up	1.38665	-0.836499	-0.0559801
chr3	48445261	48470872	-	GXT_23218244	NM_002673	GXL_13766	PLXNB1	5364	7309	38	0	1.93	up	2.03177	-2.0179	1.37534
chr3	48445261	48471460	-	GXT_23218245	NM_001130082	GXL_13766	PLXNB1	5364	7142	38	0	1.94	up	1.8275	-2.03781	1.10785
chr6	31976197	32077151	-	GXT_23218264	NM_019105	GXL_1235006	ATF6B	1388	13125	44	1.44e-118	1.18	up	1.72208	-1.38298	0.662387
chr6	154475618	154651215	-	GXT_23218265	NM_001130699	GXL_190697	IPCEF1	26034	6858	13	0.655	0.56	up	1.05271	0.171483	0.383913
chr11	2904448	2906995	-	GXT_23218290	NM_001122631	GXL_141073	CDKN1C	1028	1758	4	1.05e-67	5.67	up	2.45723	-0.858117	1.17144
chr9	140342022	140353786	-	GXT_23218381	NM_001130969	GXL_12690	NELF	26012	3649	15	0	2.07	up	3.28206	-1.6955	1.71892
chr9	140342022	140353786	-	GXT_23218386	NM_001130970	GXL_12690	NELF	26012	3580	14	0	2.08	up	3.28206	-1.6955	1.71888
chr11	67259239	67272843	-	GXT_23218408	NM_004910	GXL_41522	PITPNM1	9600	4226	24	1.76e-165	1.36	up	1.99114	-0.831569	-0.025947
chr11	67259239	67272843	-	GXT_23218409	NM_001130848	GXL_41522	PITPNM1	9600	4223	24	2.67e-166	1.36	up	1.99114	-0.831573	-0.0259339
chr9	140342022	140353786	-	GXT_23218536	NM_001130971	GXL_12690	NELF	26012	3574	14	0	2.07	up	3.28206	-1.6955	1.71887
chr1	204100190	204121307	-	GXT_23218601	NM_018208	GXL_151196	ETNK2	55224	2610	8	7.22e-46	4.73	up	3.20543	-0.113521	0.799896
chr13	99512435	99738660	-	GXT_23218706	NM_001130049	GXL_159092	DOCK9	23348	3979	33	8.36e-26	1.09	up	2.04914	-0.0611774	0.469841
chr19	5782971	5784776	-	GXT_23218742	NM_001134316	GXL_3604	PRR22	163154	1392	3	0.0159	1.25	up	1.33909	-0.454807	2.11302
chr3	24158644	24536266	-	GXT_23218772	NM_001128176	GXL_744718	THRB	7068	7466	11	4.6e-62	4.04	up	3.10086	0.0804732	0.843177
chr3	24158644	24536313	-	GXT_23218776	NM_001128177	GXL_744718	THRB	7068	7539	11	7.69e-62	3.96	up	3.10086	0.0797805	0.84305
chr3	71728440	71803532	-	GXT_23218777	NM_001134649	GXL_171103	EIF4E3	317649	6207	8	0.0202	0.46	up	1.59162	0.569987	0.297085
chr5	141689992	141704620	-	GXT_23218853	NM_001127496	GXL_103106	SPRY4	81848	4941	2	6.03e-103	1.12	up	1.3717	-0.857452	0.303978
chr4	1795039	1810599	+	GXT_23218960	NM_022965	GXL_164857	FGFR3	2261	3951	16	4.34e-14	2.5	up	3.27493	-0.640968	0.476946
chr11	47279497	47290401	+	GXT_23219019	NM_005693	GXL_170765	NR1H3	10062	1718	10	0.0487	0.41	up	2.05908	-0.295065	0.292053
chr7	139478047	139720125	+	GXT_23219149	NM_001130966	GXL_316990	TBXAS1	6916	2369	17	7.74e-13	2.02	up	1.45126	-0.0855062	0.927421
chr11	289138	295688	+	GXT_23219174	NM_025092	GXL_123127	ATHL1	80162	3268	14	1.57e-57	1.67	up	3.35525	-1.21504	0.250175
chr14	105953257	105955126	+	GXT_23219190	NM_001311	GXL_1224938	CRIP1/C14orf80	-2	480	6	3.58e-41	0.71	up	1.33414	-0.919358	0.367022
chr16	15489611	15503543	+	GXT_23219201	NM_001128423	GXL_167582	MPV17L	255027	2309	4	0.514	0.42	up	2.48278	-0.451872	0.416531
chr16	2076888	2089027	+	GXT_23219205	NM_001130012	GXL_167602	SLC9A3R2	9351	2175	7	9.07e-81	1.23	up	2.2363	-1.33433	0.327579
chr4	1795039	1810599	+	GXT_23219433	NM_000142	GXL_164857	FGFR3	2261	4287	18	4.56e-13	2.42	up	3.27493	-0.64101	0.47693
chr9	124064230	124095120	+	GXT_23219663	NM_001127665	GXL_185045	GSN	2934	2455	16	6.33e-168	1.47	up	2.15727	-0.44217	0.178191
chr15	29385277	29410404	+	GXT_23219795	ENSBTAT00000054946	GXL_4972	APBA2	321	2198	8	0.00136	0.72	up	1.92972	-0.540998	-0.332691
chr17	4711293	4725991	+	GXT_23220034	ENSBTAT00000053297	GXL_45875	PLD2	5338	2718	25	1.13e-12	0.66	up	1.02303	-0.636896	-0.0590165
chr13	113977829	114018227	-	GXT_23220120	NM_001103336	GXL_40645	GRTP1	79774	1944	7	0.0728	0.53	up	3.34252	-0.289689	-0.124564
chr4	57514157	57522755	-	GXT_23220233	ENSBTAT00000003013	GXL_125132	HOPX	84525	1056	3	3e-77	5.8	up	3.26912	-0.790227	0.903068
chr19	11436074	11448075	-	GXT_23220353	ENSBTAT00000002783	GXL_3562	RAB3D	9545	660	4	0.000663	1.43	up	1.31317	-0.726224	0.77816
chr2	241512551	241516081	+	GXT_23220419	ENSBTAT00000042602	GXL_119638	RNPEPL1	57140	947	7	4.78e-19	0.71	up	2.10763	-1.10872	0.0551551
chr7	909485	975136	-	GXT_23220462	ENSBTAT00000021211	GXL_694803	ADAP1/COX19	-2	1044	10	6.17e-47	4.16	up	1.00774	-0.876991	-0.0909923
chr7	95750460	95838290	-	GXT_23220473	ENSBTAT00000004912	GXL_97659	SLC25A13	10165	1751	14	1.72e-09	0.62	up	1.79989	0.134436	0.368963
chr11	67186949	67193228	+	GXT_23220513	ENSBTAT00000023529	GXL_664114	CARNS1	57571	2665	3	0.181	0.97	up	3.02672	-1.09115	-0.367303
chr1	180044046	180080328	+	GXT_23220680	XM_853463	GXL_120764	CEP350	9857	3838	12	2.2e-05	0.48	up	1.3052	0.258038	0.388651
chr20	60348110	60511995	+	GXT_23220817	ENSCAFT00000019813	GXL_81846	CDH4	1002	2348	12	0.0206	0.58	up	1.50673	-0.734306	-0.133321
chr17	73824064	73839341	-	GXT_23220923	ENSCAFT00000038364	GXL_36007	UNC13D	201294	3030	29	0.639	0.41	up	1.3052	-0.864825	-0.561052
chr4	185616422	185650855	-	GXT_23221032	XM_844599	GXL_164725	MLF1IP	79682	1257	12	9.66e-09	0.77	up	1.97906	0.0944022	0.0646671
chr10	91192854	91203624	-	GXT_23221073	ENSCAFT00000039338	GXL_197071	SLC16A12	387700	1321	6	0.0526	1.96	up	1.00774	0.142906	0.272996
chr2	241511595	241517764	+	GXT_23221247	XM_543324	GXL_119638	RNPEPL1	57140	2337	10	2.19e-20	0.65	up	3.48664	-0.892508	-0.208312
chr1	212501841	212535191	+	GXT_23221560	XM_001489103	GXL_120969	PPP2R5A	5525	2436	13	6.55e-19	0.65	up	1.94576	0.491395	0.138102
chr15	79051856	79092807	-	GXT_23221572	ENSECAT00000008144	GXL_189727	ADAMTS7	11173	4741	23	2.66e-69	1.08	up	1.33909	-0.606792	0.517672
chr15	93588233	93616587	-	GXT_23221579	XM_001917618	GXL_189797	RGMA	56963	1501	4	4.77e-09	1.86	up	2.24974	-1.54496	0.773999
chr15	72454610	72467770	-	GXT_23221582	XM_001494921	GXL_189854	GRAMD2	196996	1168	11	0.262	1.87	up	1.3052	-0.417063	0.738802
chr15	23048829	23061053	-	GXT_23221589	XM_001917943	GXL_225634	NIPA1	123606	1073	3	0.0848	0.51	up	2.10763	0.0435397	-0.221598
chr3	99819630	99897232	+	GXT_23221688	XM_001502207	GXL_169656	C3orf26	84319	721	9	1.31e-28	1.28	up	1.55168	0.249827	-0.395481
chr4	156696118	156727561	+	GXT_23221831	ENSECAT00000022682	GXL_175142	GUCY1B3	2983	1989	13	0.00288	1.27	up	1.00774	0.484674	-0.649381
chr10	121085027	121215096	+	GXT_23221873	XM_001496354	GXL_134341	GRK5	2869	2331	17	0.00251	0.41	up	1.37901	-0.764294	-0.18896
chr5	127595147	127872176	-	GXT_23221925	ENSECAT00000014772	GXL_103171	FBN2	2201	8477	65	0	4.22	up	3.17874	-0.165716	1.55341
chr19	8431117	8439225	+	GXT_23221969	XM_001917018	GXL_73860	ANGPTL4	51129	1101	4	1.99e-136	1.84	up	1.73439	-1.04718	1.09516
chr19	55592140	55598982	+	GXT_23221999	ENSECAT00000000442	GXL_31988	EPS8L1	54869	1745	14	0.0946	1.32	up	2.10763	-0.222823	-0.121275
chr11	67395497	67398583	-	GXT_23222124	XM_001916962	GXL_41455	NUDT8	254552	554	4	4.09e-06	1.39	up	1.26232	0.220056	-0.118254
chr12	103980631	104160114	+	GXT_23222166	XM_001916157	GXL_103649	STAB2	55576	7882	69	7.22e-05	4.31	up	1.55168	0.560724	-0.347693
chr13	109301933	109859635	+	GXT_23222277	XM_416950	GXL_40716	MYO16	23026	6096	35	2.89e-72	4.6	up	1.1673	0.47185	0.686432
chr6	75794871	75904676	-	GXT_23222418	ENSMODT00000023494	GXL_40072	COL12A1	1303	9311	64	9.73e-65	0.95	up	1.12955	0.0873466	0.794377
chr1	209768329	209784897	+	GXT_23222520	ENSMMUT00000004762	GXL_120809	CAMK1G	57172	915	9	0.776	1.69	up	1.1673	0.17253	-1.05427
chr1	204159614	204162042	-	GXT_23222576	XM_001098284	GXL_151298	KISS1	3814	453	2	2e-09	5.71	up	1.3052	-0.405373	0.148191
chr1	24410801	24419494	-	GXT_23222621	ENSMMUT00000032438	GXL_218316	MYOM3	127294	1095	7	0.829	1.02	up	1.92972	-0.436407	-0.649982
chr1	145713524	145764074	+	GXT_23222715	XM_001088569	GXL_744485	PDZK1	5174	2082	9	9.6e-11	3.16	up	1.1056	-0.197342	0.511697
chr1	91980488	91989785	+	GXT_23222763	ENSMMUT00000046731	GXL_228220	CDC7	8317	338	3	0.044	0.79	up	1.3052	0.392223	1.08312
chr15	69672219	69696161	+	GXT_23222827	ENSMMUT00000020886	GXL_230374	PAQR5	54852	945	6	5.84e-11	1.42	up	1.56358	-0.799459	-0.311941
chr15	65488048	65502203	-	GXT_23222921	XM_001108811	GXL_189937	CILP	8483	4677	8	0.257	0.66	up	1.94576	-0.0686063	-0.756924
chr20	60913073	60943357	-	GXT_23223220	ENSMMUT00000045217	GXL_128313	LAMA5	3911	1605	14	4.63e-05	1.6	up	2.10763	-0.84019	-0.898778
chr3	16260928	16269089	+	GXT_23223344	ENSMMUT00000031926	GXL_193604	GALNTL2	117248	601	4	5.41e-227	6.03	up	1.1673	-0.20204	1.20106
chr6	149772503	149795679	-	GXT_23223486	ENSMMUT00000021028	GXL_383762	ZC3H12D	340152	900	5	0.39	1.77	up	1.55168	-0.332418	1.23697
chr6	110428280	110448804	-	GXT_23223528	ENSMMUT00000020714	GXL_190840	WASF1	8936	540	4	1.25e-05	0.79	up	1.79989	0.382863	0.51371
chr17	77753159	77758841	+	GXT_23223698	ENSMMUT00000023050	GXL_175536	CBX2	84733	1485	3	0.0247	1.46	up	1.40174	-0.471386	0.561059
chr13	25481051	25487163	-	GXT_23224059	ENSMMUT00000043472	GXL_159040	CENPJ	55835	1135	10	0.02	0.86	up	1.37901	0.0788947	0.945549
chr4	41496547	41694403	+	GXT_23224128	ENSMMUT00000010938	GXL_164829	LIMCH1	22998	3078	24	1.02e-91	0.99	up	1.12955	0.0787864	0.430885
chr18	2703699	2784877	+	GXT_23224436	ENSMMUT00000048277	GXL_70858	SMCHD1	23347	4098	34	6.03e-05	0.4	up	1.76214	0.407333	0.269281
chr18	11981057	12030842	+	GXT_23224442	ENSMMUT00000014651	GXL_47213	IMPA2	3613	1224	8	0	3.93	up	1.20276	-1.10555	0.775112
chr8	144650806	144653979	-	GXT_23224479	ENSMMUT00000038801	GXL_483860	C8orf73	642475	1132	8	0.311	0.85	up	1.76214	-1.01004	-0.217594
chr8	144649954	144652915	-	GXT_23224480	ENSMMUT00000002317	GXL_483860	C8orf73	642475	1179	9	0.602	0.44	up	1.59527	-1.60304	-0.140658
chr8	21972582	21986683	-	GXT_23224496	ENSMMUT00000018265	GXL_29825	HR	55806	4036	17	2.54e-55	2.01	up	2.73824	-1.65264	-0.32501
chr19	38741958	38743615	-	GXT_23224961	ENSMMUT00000038531	GXL_184421	PPP1R14A	94274	244	3	0	3.75	up	2.005	-2.47408	0.61842
chr19	6213053	6270783	-	GXT_23224986	ENSMMUT00000008000	GXL_3558	MLLT1	4298	1672	11	7.53e-34	0.74	up	3.85989	-0.578417	0.679337
chr7	3658711	4285437	+	GXT_23225516	ENSMMUT00000027717	GXL_483430	SDK1	221935	6106	43	1.11e-101	3.01	up	1.55168	-0.343246	0.49953
chr7	1024045	1028458	+	GXT_23225622	ENSMMUT00000010064	GXL_35185	CYP2W1	54905	1302	8	1	0.85	up	2.41677	-0.38739	-0.327598
chr12	4724905	4747362	-	GXT_23225829	ENSMMUT00000029281	GXL_139781	AKAP3	10566	2574	3	0.355	1.08	up	1.13067	0.298824	0.210752
chr3	52435069	52437182	-	GXT_23226110	AK009033	GXL_171118	BAP1	8314	1564	4	6.27e-10	0.49	up	1.3052	-0.148265	INF
chr17	53039992	53042486	-	GXT_23226161	ENSMUST00000099960	GXL_35934	COX11	1353	817	3	5.46e-05	0.66	up	2.78024	1.81589	0.51756
chr21	40186861	40196730	+	GXT_23226176	AK030537	GXL_176127	ETS2	2114	2862	6	0.000167	0.57	up	1.25172	-0.318264	0.384368
chr10	46111744	46121960	-	GXT_23226215	AK006693	GXL_227911	ANUBL1	93550	1023	4	0.0543	0.57	up	1.94576	0.20408	1.07517
chr22	41641809	41645440	-	GXT_23226269	AK005370	GXL_249650	RANGAP1	5905	969	2	2.86e-39	0.69	up	1.00774	-0.878439	-0.283699
chr1	27681717	27688676	-	GXT_23226621	ENSPTRT00000000795	GXL_218307	MAP3K6	9064	2635	20	2.38e-22	0.72	up	2.41677	-0.703565	0.0341878
chr15	40629489	40631263	-	GXT_23226681	ENSPTRT00000064942	GXL_225412	C15orf52	388115	770	4	4.7e-12	1.02	up	1.3517	-0.326595	-0.0865947
chr14	35522406	35552945	+	GXT_23226745	XM_001136374	GXL_247812	FAM177A1	283635	3134	4	2.19e-22	0.74	up	1.18898	0.505204	1.12869
chr20	45353679	45362473	+	GXT_23226844	ENSPTRT00000025310	GXL_132672	SLC2A10	81031	1623	4	3.74e-27	0.86	up	1.50673	-0.448273	0.18412
chr20	60414009	60512314	+	GXT_23226864	XM_001147328	GXL_81846	CDH4	1002	2930	20	0.00944	0.57	up	1.00774	-0.81618	-0.22541
chr3	127411041	127414205	-	GXT_23226902	XM_001140395	GXL_925875	MGLL	11343	429	3	9.68e-62	1.28	up	2.48278	-0.188421	-0.131381
chr17	79678309	79679355	+	GXT_23227081	XM_511743	GXL_744363	SLC25A10/MRPL12	-2	579	2	1	0.74	up	1.10354	-0.885367	-0.115396
chr17	53029267	53031467	-	GXT_23227106	XM_001171591	GXL_35934	COX11	1353	653	2	0.784	0.45	up	2.72676	0.857734	2.11705
chr9	19052745	19097373	-	GXT_23227228	XM_001149956	GXL_31705	HAUS6	54801	6944	16	1.16e-10	0.75	up	1.47504	0.382855	0.856992
chr10	46957565	46993343	-	GXT_23227299	XM_001156614	GXL_227880	SYT15	83849	7461	14	7.09e-37	1.24	up	2.2787	0.0981835	-0.119572
chr4	3475135	3502552	+	GXT_23227395	ENSPTRT00000029617	GXL_164651	DOK7	285489	1386	6	0.0427	0.98	up	3.02672	-0.728354	-0.771711
chr8	140743304	141449199	-	GXT_23227467	ENSPTRT00000066911	GXL_172549	TRAPPC9	83696	2745	20	1.44e-42	1.03	up	1.33909	-0.534776	0.0516794
chr19	47906392	47920645	-	GXT_23227611	ENSPTRT00000020828	GXL_189047	MEIS3	56917	1680	12	9.53e-89	1.9	up	2.24071	-0.524034	1.00174
chr19	51159812	51163150	+	GXT_23227623	XM_512842	GXL_481216	LOC342918	342918	1155	3	0.829	1.33	up	2.10763	-0.105094	-1.3398
chr12	133200348	133219895	-	GXT_23228092	ENSPTRT00000010412	GXL_66192	POLE	5426	3496	16	3.11e-09	0.6	up	2.02142	-1.01656	0.623086
chr16	1242781	1264027	+	GXT_23228140	XM_001172468	GXL_381489	CACNA1H	8912	5113	23	1	0.77	up	2.48278	-0.880698	-0.0786902
chr17	53392584	53398240	+	GXT_23228414	ENSRNOT00000055664	GXL_8722	HLF	3131	441	2	0.262	2.93	up	1.59527	0.426326	-0.467359
chr14	93170205	93185214	-	GXT_23228862	XM_001927082	GXL_101150	LGMN	5641	1647	12	4.13e-37	0.87	up	1.50673	-0.716154	0.305902
chr11	70315538	70507869	-	GXT_23383255	ENST00000409161	GXL_691537	SHANK2	22941	7198	9	6.07e-18	1.1	up	1.4732	-0.915966	-0.398048
chr2	233759312	233792864	-	GXT_23383787	ENST00000409079	GXL_89147	NGEF	25791	1022	4	0.000265	0.95	up	1.59527	-0.0476112	-0.522963
chr2	239146917	239148612	-	GXT_23383801	ENST00000409002	GXL_88986	HES6	55502	1286	4	8.51e-08	1.14	up	2.38485	-0.704412	-0.072942
chr2	239147246	239148599	-	GXT_23383802	ENST00000409182	GXL_88986	HES6	55502	863	3	9.66e-05	1.06	up	2.38485	-0.742144	-0.462156
chr2	239147501	239148682	-	GXT_23383803	ENST00000409574	GXL_88986	HES6	55502	738	4	0.000765	0.98	up	2.38485	-0.853044	-0.570624
chr2	239147811	239148665	-	GXT_23383804	ENST00000409356	GXL_88986	HES6	55502	528	3	0.00358	1.03	up	2.38485	-1.03248	-0.652124
chr14	105953204	105955075	+	GXT_23383941	ENST00000409393	GXL_1224938	CRIP1/C14orf80	-2	468	6	4.75e-44	0.71	up	1.32433	-0.918933	0.354827
chr11	289138	296107	+	GXT_23383997	ENST00000409548	GXL_123127	ATHL1	80162	3687	14	1.02e-58	1.68	up	3.35525	-1.20925	0.249648
chr11	289172	295676	+	GXT_23383998	ENST00000409655	GXL_123127	ATHL1	80162	2963	13	1.69e-59	1.65	up	3.35525	-1.21788	0.251831
chr7	29234028	29553944	+	GXT_23384055	ENST00000222792	GXL_779663	CHN2	1124	3530	13	5.65e-23	3.43	up	2.21315	0.26267	0.967982
chr2	102759246	102792219	+	GXT_23384388	ENST00000409288	GXL_131909	IL1R1	3554	1735	11	6.1e-18	0.71	up	1.06108	-0.0167386	0.151983
chr2	102759246	102796334	+	GXT_23384389	ENST00000410023	GXL_131909	IL1R1	3554	5143	12	9.02e-46	0.69	up	1.06108	-0.0249088	0.123349
chr2	137523115	138435287	+	GXT_23384466	ENST00000409968	GXL_482238	THSD7B	80731	6112	28	3.35e-07	5.42	up	1.15984	0.344674	1.01593
chr2	238768266	238820598	+	GXT_23384663	ENST00000409726	GXL_119668	RAMP1	10267	734	4	4.4e-283	1.85	up	2.36973	-1.47663	-0.159229
chr21	44881974	44898103	-	GXT_23384851	NR_026863	GXL_693526	C21orf84	114038	579	4	0.569	1.42	up	1.47504	-0.85527	0.512497
chr7	128032331	128046024	-	GXT_23384924	NM_001142573	GXL_182345	IMPDH1	3614	2381	14	2.57e-21	0.62	up	1.49817	-0.507713	-0.233211
chr7	128032331	128046024	-	GXT_23384925	NM_001142574	GXL_182345	IMPDH1	3614	2366	14	2.61e-21	0.62	up	1.49817	-0.507717	-0.233197
chr7	128032331	128046024	-	GXT_23384926	NM_001142575	GXL_182345	IMPDH1	3614	2306	13	1.24e-21	0.62	up	1.49817	-0.507703	-0.233155
chr8	95139394	95229531	-	GXT_23384937	NM_001144663	GXL_172526	CDH17	1015	3699	18	1	0.64	up	2.2787	-0.0460574	0.294263
chr9	124584204	124855885	-	GXT_23384945	NM_001139442	GXL_190045	TTLL11	158135	3253	9	0.00102	0.56	up	1.4013	-0.39048	-0.155876
chr11	67559238	67572807	-	GXT_23384993	NR_024249	GXL_691531	LOC645332	645332	1859	4	0.634	0.41	up	1.44977	-0.165015	-0.0338554
chr15	69096160	69099440	-	GXT_23385050	NR_026808	GXL_189856	C15orf28	80035	3281	1	0.551	1.03	up	1.31317	0.207565	-0.114013
chr2	239146908	239148681	-	GXT_23385154	NM_001142853	GXL_88986	HES6	55502	1364	4	2.92e-07	1.08	up	2.38485	-0.691942	-0.183706
chr3	10327434	10334631	-	GXT_23385173	NM_001134944	GXL_13876	GHRL	51738	477	4	0.568	1.64	up	1.92972	-0.481208	-0.501897
chr5	135527156	135528851	-	GXT_23385194	NR_024418	GXL_779615	LOC389332	389332	1696	1	0.933	0.49	up	1.53499	-0.437424	-0.0303572
chr7	29959719	30029905	-	GXT_23385229	NM_001145514	GXL_12611	SCRN1	9805	5208	8	4.76e-29	0.68	up	1.01879	-0.000950061	0.0904837
chr18	52568740	52625279	-	GXT_23385347	NM_001143829	GXL_70904	CCDC68	80323	4029	12	0	4.53	up	2.20845	-0.132032	0.582759
chr19	38701649	38720317	-	GXT_23385359	NM_001135156	GXL_184333	DPF1	8193	2303	12	3.38e-06	1.1	up	1.4732	-0.949628	-0.000561322
chr1	1353800	1356650	-	GXT_23385394	NR_026871	GXL_692973	LOC441869	441869	1477	3	0.014	1.07	up	2.98177	-0.702534	0.59437
chr1	47897805	47900313	-	GXT_23385395	NR_026878	GXL_779400	MGC12982	84793	2509	1	0.000117	1.38	up	1.92972	-1.14921	-0.653798
chr1	934344	935552	-	GXT_23385402	NM_001142467	GXL_34865	HES4	57801	1038	3	0.000363	1.18	up	1.47774	-0.856282	-0.473635
chr22	38740670	38794931	-	GXT_23385421	NR_002821	GXL_744632	CSNK1E	1454	494	5	0.364	0.92	up	1.23552	-0.0538251	0.170908
chr3	10327434	10334631	-	GXT_23385449	NM_001134945	GXL_13876	GHRL	51738	474	4	0.568	1.64	up	1.92972	-0.481206	-0.50191
chr6	41902671	42016610	-	GXT_23385472	NM_001136017	GXL_40110	CCND3	896	2060	5	5.72e-63	1.13	up	3.2331	-1.28913	0.773842
chr6	35694539	35703657	-	GXT_23385482	NR_027117	GXL_694672	FKBP5	2289	1627	9	9.32e-06	5.11	up	1.50673	-1.96086	1.6353
chr6	41902671	42016610	-	GXT_23385483	NM_001136126	GXL_40110	CCND3	896	1844	4	2.07e-66	1.17	up	3.2331	-1.28912	0.773816
chr7	29959719	30029734	-	GXT_23385486	NM_001145513	GXL_12611	SCRN1	9805	5276	8	4.83e-29	0.68	up	1.08319	-0.00156133	0.112431
chr8	9757574	9760839	-	GXT_23385505	NR_024281	GXL_29856	LOC157627	157627	2922	3	0.00342	2.11	up	1.25172	-0.0841728	-0.581738
chr11	19732480	19736146	-	GXT_23385560	NR_015384	GXL_779169	LOC100126784	100126784	3667	1	1.52e-25	1.99	up	2.00896	-0.768863	0.119158
chr16	30103637	30107537	-	GXT_23385609	NM_001145524	GXL_480615	YPEL3	83719	940	5	5.74e-17	0.71	up	0.985941	0.0388708	-0.532412
chr1	1353800	1356650	-	GXT_23385662	NM_001145210	GXL_692973	LOC441869	441869	2018	4	0.0302	0.94	up	2.98177	-0.702461	0.594326
chr3	127291912	127309568	-	GXT_23385685	NM_001142646	GXL_181907	TPRA1	131601	1743	9	7.17e-23	0.62	up	1.1794	-0.472716	-0.696488
chr3	127291915	127309496	-	GXT_23385686	NM_001136053	GXL_181907	TPRA1	131601	1832	11	1.87e-21	0.61	up	1.22104	-0.476081	-0.726932
chr3	10327434	10334631	-	GXT_23385694	NM_001134946	GXL_13876	GHRL	51738	360	3	0.776	1.21	up	1.92972	-0.481173	-0.501953
chr11	3108346	3186582	-	GXT_23385822	NM_001144063	GXL_141014	OSBPL5	114879	3684	21	9.98e-161	1.58	up	1.49014	-0.881117	0.956343
chr19	46093022	46105466	-	GXT_23385888	NM_005282	GXL_744406	GPR4/OPA3	-2	3048	2	3.28e-06	5.14	up	1.92972	0.153615	-0.445417
chr2	132905164	133015542	-	GXT_23385960	NR_027020	GXL_482229	ANKRD30BL	554226	1425	5	0.123	0.53	up	1.59979	0.14612	0.278647
chr3	10327434	10334631	-	GXT_23385971	NR_024136	GXL_13876	GHRL	51738	614	5	0.829	0.42	up	1.92972	-0.481163	-0.501979
chr4	57514154	57522688	-	GXT_23385973	NM_139211	GXL_125132	HOPX	84525	1145	3	2.6e-79	5.84	up	3.16911	-0.775776	0.85277
chr4	57514154	57522688	-	GXT_23385974	NM_001145459	GXL_125132	HOPX	84525	1190	3	5.75e-80	5.86	up	3.16911	-0.775762	0.852763
chr5	35055802	35066206	-	GXT_23385987	NM_000949	GXL_779601	PRLR	5618	10405	1	8.24e-08	2.79	up	1.94576	0.62801	0.176666
chr19	2997636	3029612	-	GXT_23386136	NM_001144762	GXL_3391	TLE2	7089	2282	18	1.15e-65	2.78	up	1.19163	-0.777322	1.21691
chr19	39818999	39826726	-	GXT_23386141	NM_004877	GXL_184516	GMFG	9535	657	7	1.44e-05	2.59	up	1.25172	0.157183	0.346762
chr22	24176690	24181199	-	GXT_23386171	NM_001135751	GXL_249718	DERL3	91319	1069	7	0.0725	1.44	up	2.41677	-0.737274	-0.238077
chr15	83776324	83806111	+	GXT_23386298	NM_001144903	GXL_230379	TM6SF1	53346	1816	9	2.43e-11	1.58	up	2.11051	-0.53739	0.898975
chr17	43325303	43345997	+	GXT_23386322	NR_024434	GXL_102630	LOC100133991	100133991	906	3	0.25	1.12	up	2.48566	-1.1549	-0.0117232
chr18	18822203	19102791	+	GXT_23386336	NM_001142966	GXL_692705	GREB1L	80000	6052	33	1.04e-118	3.24	up	4.15759	0.597124	1.4007
chr19	33793763	33795963	+	GXT_23386354	NR_026887	GXL_262449	LOC80054	80054	2201	1	0.304	0.81	up	2.72266	-0.196041	0.523813
chr21	46875424	46933634	+	GXT_23386394	NM_130444	GXL_176090	COL18A1	80781	6608	41	3.01e-06	0.41	up	1.3052	-0.720372	-0.308372
chr2	43454350	43455994	+	GXT_23386409	NR_027251	GXL_693721	LOC100129726	100129726	1645	1	0.318	1.25	up	1.01926	-0.364703	0.214821
chr5	142150292	142608572	+	GXT_23386437	NM_015071	GXL_27379	ARHGAP26	23092	9041	23	1.33e-07	0.73	up	1.07147	-0.0262962	-0.160506
chr5	142150292	142608572	+	GXT_23386439	NM_001135608	GXL_27379	ARHGAP26	23092	8876	23	6.11e-08	0.75	up	1.07147	-0.0262697	-0.16054
chr9	87284595	87492813	+	GXT_23386473	NM_001018065	GXL_317026	NTRK2	4915	8324	15	3.64e-29	2.17	up	1.34005	0.329477	0.697085
chr11	65407592	65418391	+	GXT_23386534	NM_153253	GXL_38989	SIPA1	6494	3630	16	1.21e-12	0.67	up	2.10763	-0.653119	-0.0952888
chr14	105266933	105271049	+	GXT_23386563	NM_001137601	GXL_172855	ZBTB42	100128927	3637	2	0.000641	0.62	up	1.16018	-0.863039	0.298403
chr1	40420784	40435628	+	GXT_23386629	NM_001136493	GXL_46998	MFSD2A	84879	2201	14	0.00146	0.56	up	0.993092	-0.711918	-0.130845
chr1	155006282	155023406	+	GXT_23386630	NM_001143687	GXL_925479	ADAM15/DCST1	-2	2222	16	0.0361	1.78	up	1.25172	-0.387137	0.136666
chr1	225997797	226033264	+	GXT_23386639	NM_001136018	GXL_19320	EPHX1	2052	1664	9	1.69e-20	0.65	up	1.61895	-0.706114	0.645396
chr1	61547980	61928460	+	GXT_23386640	NM_001134673	GXL_779403	NFIA	4774	9482	11	6.24e-168	2.18	up	0.987217	-0.4557	1.59018
chr22	44577257	44603035	+	GXT_23386662	NM_001137606	GXL_47777	PARVG	64098	1968	14	0.568	1.2	up	3.4541	-0.961038	0.467872
chr21	35552978	35562220	+	GXT_23386895	NR_027266	GXL_163519	C21orf82	114036	1269	2	0.639	0.93	up	1.00386	-0.472897	1.77275
chr22	30792930	30812964	+	GXT_23386914	NM_033382	GXL_825531	SEC14L2/MTFP1	-2	1829	11	4.95e-111	1.77	up	1.21735	-0.259047	0.51307
chr12	66582978	66648402	+	GXT_23387063	NM_001142523	GXL_779200	IRAK3	11213	8161	11	6.43e-236	3.49	up	1.78714	0.148122	0.661124
chr12	31800094	31822016	+	GXT_23387066	NM_001135864	GXL_59679	METTL20	254013	2090	4	0.000254	0.86	up	2.10763	0.255335	0.0344155
chr14	24780705	24787242	+	GXT_23387076	NM_001143919	GXL_691963	LTB4R	1241	2706	2	0.00728	0.71	up	1.18843	-0.616154	0.785802
chr19	21560188	21571384	+	GXT_23387125	NR_027130	GXL_824782	ZNF738	148203	11197	1	0.0619	0.44	up	1.92972	0.922296	3.51667
chr3	32023266	32033120	+	GXT_23387202	NM_001137674	GXL_482422	ZNF860	344787	3098	2	0.00325	1.26	up	1.32638	-0.129339	0.0202027
chr11	118478306	118528741	+	GXT_23387299	NM_001144759	GXL_174035	PHLDB1	23187	5298	21	2.68e-38	0.56	up	1.52421	-0.78984	-0.206958
chr11	118478306	118528741	+	GXT_23387300	NM_001144758	GXL_174035	PHLDB1	23187	5472	23	2.74e-38	0.56	up	1.52421	-0.789843	-0.206988
chr17	48712218	48745288	+	GXT_23387357	NM_001144070	GXL_8643	ABCC3	8714	1885	12	6.88e-196	2.45	up	1.84397	-0.839539	0.313633
chr3	132757171	133116619	+	GXT_23387476	NM_001136469	GXL_119094	TMEM108	66000	3787	6	0.381	0.62	up	1.16702	0.157697	-0.509045
chr9	91605778	91611057	+	GXT_23387540	NM_001142413	GXL_15176	S1PR3	1903	4839	3	1.66e-11	3.65	up	2.628	-1.50325	0.353919
chr9	87284595	87492813	+	GXT_23387542	NM_001018066	GXL_317026	NTRK2	4915	8276	14	3.64e-29	2.17	up	1.34005	0.329463	0.697086
chr3	128226678	128229438	+	GXT_23387675	NR_026954	GXL_119283	LOC90246	90246	2761	1	0.117	2.07	up	1.00386	0.139118	-0.717285
chr10	87361734	87551316	-	GXT_23387740	AK302192	GXL_197158	GRID1	2894	2199	9	0.262	2.83	up	1.00774	-0.290364	-0.120272
chr10	104849342	104913384	-	GXT_23387767	AK295593	GXL_197116	NT5C2	22978	2009	17	1.87e-06	0.4	up	1.00774	0.278321	0.884786
chr10	21074095	21461363	-	GXT_23387775	AK316521	GXL_227930	NEBL	10529	1282	6	1.85e-17	6.39	up	1.10075	0.613991	1.55098
chr12	121746161	121768859	-	GXT_23387953	AK301197	GXL_66206	ANAPC5	51433	1742	9	1.56e-08	0.41	up	2.10763	0.0850699	0.818942
chr15	93588048	93617092	-	GXT_23388087	AK299363	GXL_189797	RGMA	56963	1664	4	1.56e-12	1.91	up	2.4653	-1.56399	0.681972
chr16	49524698	49698136	-	GXT_23388116	AK304829	GXL_133428	ZNF423	23090	4201	6	2.91e-32	0.84	up	2.0116	-0.665158	0.641189
chr16	322259	325937	-	GXT_23388168	AK294448	GXL_75847	RGS11	8786	918	10	0.00765	2.05	up	3.4541	-0.800478	0.440029
chr16	324404	325915	-	GXT_23388172	AK294033	GXL_75847	RGS11	8786	808	3	0.356	1.37	up	3.4541	-0.452696	-1.03253
chr16	319273	325937	-	GXT_23388175	AK293564	GXL_75847	RGS11	8786	1314	17	0.236	0.85	up	3.4541	-0.808137	-0.0685409
chr17	73758785	73761238	-	GXT_23388186	AK316181	GXL_35971	GALK1	2584	1112	3	1.14e-06	0.56	up	1.6159	-1.34997	0.723349
chr17	41605646	41623691	-	GXT_23388195	AK315961	GXL_36916	ETV4	2118	1775	12	5.02e-32	2.54	up	1.52865	-1.10313	0.462171
chr17	41605297	41623267	-	GXT_23388243	AK299019	GXL_36916	ETV4	2118	2024	12	5.4e-74	2.48	up	1.3522	-1.06384	0.509203
chr17	41605648	41623081	-	GXT_23388245	AK298872	GXL_36916	ETV4	2118	1628	11	2.23e-35	2.55	up	1.29616	-1.03558	0.506447
chr19	19675584	19729490	-	GXT_23388363	AK301631	GXL_184310	PBX4	80714	1034	6	0.939	0.5	up	1.27363	-0.375451	0.429388
chr1	204100952	204120910	-	GXT_23388485	AK302145	GXL_151196	ETNK2	55224	1328	7	1.54e-23	5.58	up	3.32967	-0.0724511	1.06867
chr1	31653966	31712401	-	GXT_23388526	AK299507	GXL_218299	NKAIN1	79570	1215	7	0.118	1.52	up	1.00774	-0.308572	-0.320322
chr1	204101216	204121018	-	GXT_23388590	AK293426	GXL_151196	ETNK2	55224	1035	7	8.22e-18	5.56	up	3.32967	-0.0762308	1.02808
chr20	49203337	49307916	-	GXT_23388616	AK299337	GXL_693440	FAM65C	140876	3536	22	2.39e-06	2.19	up	1.61668	-0.472828	1.23991
chr20	49209603	49307758	-	GXT_23388622	AK295781	GXL_693440	FAM65C	140876	2595	18	1.19e-05	2.52	up	2.14108	-0.48292	1.24098
chr21	30909653	31311960	-	GXT_23388654	AK294353	GXL_382696	GRIK1	2897	2387	14	1	0.43	up	1.01032	0.278812	0.120889
chr22	19167297	19279208	-	GXT_23388670	AK302506	GXL_249619	CLTCL1	8218	5004	32	3.12e-101	1.26	up	1.11599	-0.23039	0.468335
chr22	43015658	43040637	-	GXT_23388672	AK302204	GXL_75083	CYB5R3	1727	1248	9	2.67e-13	0.42	up	1.82492	-0.482291	0.104841
chr22	50704578	50708793	-	GXT_23388681	AK299745	GXL_75102	MAPK11	5600	1408	6	0.0861	0.49	up	1.37984	-1.41337	0.125989
chr2	239974703	240077271	-	GXT_23388738	AK302719	GXL_694015	HDAC4	9759	2707	21	8.26e-07	0.75	up	1.33909	-0.55916	-0.303979
chr2	109745008	109746575	-	GXT_23388784	AK297376	GXL_779521	LOC100287216	100287216	1568	1	4.23e-83	2.2	up	2.71015	-5.43491	0.539686
chr2	183007354	183387064	-	GXT_23388802	AK295657	GXL_241179	PDE1A	5136	2116	16	2.2e-33	3.01	up	1.56358	0.363336	1.10083
chr3	133661156	133748769	-	GXT_23388848	AK303550	GXL_181866	SLCO2A1	6578	1498	7	0.161	1.53	up	2.19617	-0.63098	0.900706
chr4	82010647	82074878	-	GXT_23388935	AK316140	GXL_220997	PRKG2	5593	1721	14	1	1.01	up	3.02672	0.501976	0.517906
chr4	7959216	8129389	-	GXT_23388953	AK301060	GXL_125095	ABLIM2	84448	1453	12	4.55e-33	6.08	up	1.33909	-0.55085	-0.0747267
chr4	47663505	47840084	-	GXT_23388968	AK297675	GXL_125298	CORIN	10699	1965	11	0	5.74	up	3.02109	-0.576496	0.67161
chr5	138727635	138729100	-	GXT_23389004	AK316483	GXL_483094	LOC389333	389333	1466	1	0.00148	1.36	up	2.48566	-0.909001	-0.146812
chr5	114462178	114505563	-	GXT_23389006	AK316422	GXL_103207	TRIM36	55521	2405	10	0.00152	2.92	up	2.30997	0.552298	0.739966
chr5	136957628	137042116	-	GXT_23389021	AK303916	GXL_103240	KLHL3	26249	1566	9	0.219	0.46	up	2.48278	-0.289599	0.635772
chr5	36249435	36302002	-	GXT_23389027	AK302947	GXL_383385	RANBP3L	202151	2278	15	0.00319	1.51	up	1.8685	0.0484112	1.0654
chr5	114460460	114505658	-	GXT_23389061	AK296389	GXL_103207	TRIM36	55521	4218	10	0.000468	2.88	up	1.85814	0.547601	0.853977
chr6	35543217	35656692	-	GXT_23389101	AK303356	GXL_694672	FKBP5	2289	1790	12	0	6.04	up	1.76443	-0.567257	1.72325
chr6	35543176	35656692	-	GXT_23389105	AK302704	GXL_694672	FKBP5	2289	1414	7	0	6.03	up	1.76443	-0.569277	1.72329
chr6	24840351	24877541	-	GXT_23389124	AK300138	GXL_694612	FAM65B	9750	2812	14	7.23e-127	3.14	up	2.10763	0.218814	1.48091
chr6	135239311	135271222	-	GXT_23389134	AK298325	GXL_190817	ALDH8A1	64577	1587	6	0.639	1.09	up	1.15984	0.270675	-1.56795
chr7	107790532	108096829	-	GXT_23389193	AK299870	GXL_182395	NRCAM	4897	3933	31	1.55e-52	2.43	up	2.8162	0.511433	0.906579
chr7	77648336	79082875	-	GXT_23389210	AK297353	GXL_97864	MAGI2	9863	4219	22	2.91e-05	0.69	up	1.05085	0.230781	0.207178
chr7	44257158	44365074	-	GXT_23389233	AK294138	GXL_12450	CAMK2B	816	1856	18	0.161	1.71	up	2.10763	-0.19006	-0.801543
chr8	134050612	134114846	-	GXT_23389265	AK297519	GXL_172724	SLA	6503	977	7	0.829	0.71	up	1.1673	-0.382255	-0.0411607
chr8	134050672	134114856	-	GXT_23389266	AK297423	GXL_172724	SLA	6503	896	7	0.639	1.02	up	1.1673	-0.383358	-0.0412594
chr8	80949801	80992788	-	GXT_23389271	AK296615	GXL_1237634	TPD52	7163	1325	6	0.0355	0.69	up	1.12955	0.45348	0.587877
chr9	140343443	140352103	-	GXT_23389299	AK316046	GXL_12690	NELF	26012	1544	12	6.62e-290	2.14	up	4.04322	-1.41998	1.43956
chr9	140343309	140349159	-	GXT_23389303	AK303976	GXL_12690	NELF	26012	1521	11	0	2.1	up	1.92972	-0.52448	1.72534
chr9	136028789	136039301	-	GXT_23389304	AK303825	GXL_779769	RALGDS/GBGT1	-2	1449	6	0.00832	0.82	up	2.27867	-0.815053	0.144806
chr10	94590935	94818347	+	GXT_23389493	AK300285	GXL_248893	EXOC6	54536	2841	23	1.32e-05	0.75	up	1.00774	0.25997	0.0179613
chr10	18429699	18828696	+	GXT_23389504	AK296471	GXL_90449	CACNB2	783	1993	14	1.82e-08	3.47	up	4.39926	0.226196	0.885878
chr10	18429810	18816592	+	GXT_23389524	AK293837	GXL_90449	CACNB2	783	1183	11	0.0175	3.96	up	4.43842	0.230571	0.889265
chr11	10471868	10527851	+	GXT_23389619	AK295046	GXL_123372	AMPD3	272	2720	14	2.03e-14	1.5	up	1.91876	-1.08014	0.761538
chr11	10472489	10527643	+	GXT_23389626	AK294444	GXL_123372	AMPD3	272	2215	13	4.67e-15	1.56	up	1.85941	-1.08401	0.747887
chr12	101188735	101522114	+	GXT_23389654	AK316105	GXL_141551	ANO4	121601	3559	28	2.2e-12	4.15	up	1.00386	0.1364	-0.445372
chr12	32687258	32793671	+	GXT_23389673	AK303334	GXL_779190	FGD4	121512	2925	17	4.54e-272	2.38	up	1.00596	-1.1015	1.08501
chr12	101188736	101522065	+	GXT_23389729	AK293810	GXL_141551	ANO4	121601	3509	28	1.25e-12	4.18	up	1.00386	0.136512	-0.445331
chr15	91293246	91358576	+	GXT_23389865	AK295194	GXL_230357	BLM	641	3505	21	0.000577	0.8	up	1.50673	0.143016	-0.483423
chr17	72733393	72742001	+	GXT_23390000	AK296172	GXL_8630	RAB37	326624	1031	8	0.776	1.35	up	1.33909	-0.255148	0.197508
chr19	17862315	17899262	+	GXT_23390036	AK316458	GXL_262523	FCHO1	23149	2906	27	0.677	0.92	up	1.33909	-0.390855	-0.190917
chr19	41120017	41135554	+	GXT_23390055	AK304612	GXL_262113	LTBP4	8425	1700	8	7.35e-05	0.44	up	1.1076	-0.942065	-0.0662799
chr19	54386913	54410226	+	GXT_23390061	AK303741	GXL_32062	PRKCG	5582	1781	15	0.829	1.25	up	2.02142	-0.198667	-0.0331008
chr19	709097	735048	+	GXT_23390075	AK299809	GXL_73776	PALM	5064	1346	6	2.41e-05	0.47	up	1.08199	-0.691183	-0.0130393
chr1	21835921	21904668	+	GXT_23390228	AK298085	GXL_59104	ALPL	249	2131	11	0	5.34	up	2.38485	-0.883599	-0.0652721
chr1	21835919	21904892	+	GXT_23390265	AK295608	GXL_59104	ALPL	249	2241	10	0	5.36	up	2.38485	-0.882582	-0.0658559
chr1	16355007	16357097	+	GXT_23390299	AK293586	GXL_925388	CLCNKA	1187	831	5	1	0.46	up	1.18898	-0.489239	-0.207664
chr1	21835933	21904295	+	GXT_23390302	AK293184	GXL_59104	ALPL	249	1870	12	6e-299	5.09	up	2.38485	-0.883091	-0.0640276
chr20	42295754	42344958	+	GXT_23390323	AK303249	GXL_132726	MYBL2	4605	2432	13	8.2e-05	0.42	up	1.30511	-0.5449	-0.256931
chr20	36932592	36965722	+	GXT_23390359	AK296568	GXL_693418	BPI	671	1499	15	1	1.33	up	1.55168	0.00565036	-1.11437
chr22	30793034	30818590	+	GXT_23390378	AK303751	GXL_825531	SEC14L2/MTFP1	-2	1229	10	4.72e-102	1.79	up	1.18663	-0.167052	0.45625
chr22	42177419	42190052	+	GXT_23390397	AK301391	GXL_47689	MEI1	150365	909	4	0.0247	2.1	up	1.25172	0.111076	0.0474679
chr22	30793040	30818865	+	GXT_23390412	AK296540	GXL_825531	SEC14L2/MTFP1	-2	1671	11	4.36e-254	1.85	up	1.19231	-0.166346	0.432728
chr2	29353540	29405369	+	GXT_23390455	AK304384	GXL_42032	CLIP4	79745	2744	16	3.55e-17	0.65	up	2.10763	0.210468	0.750484
chr2	101437487	101612097	+	GXT_23390545	AK294733	GXL_131869	NPAS2	4862	2726	21	1.13e-122	2.15	up	3.09209	-1.54298	-0.111988
chr3	13659712	13679536	+	GXT_23390610	AK300913	GXL_193445	FBLN2	2199	1948	13	1.24e-87	0.94	up	1.00774	-1.15216	0.120616
chr4	156680144	156727942	+	GXT_23390674	AK315944	GXL_175142	GUCY1B3	2983	2316	13	0.000829	1.12	up	1.28002	0.26346	-0.435574
chr4	156680173	156727770	+	GXT_23390694	AK300296	GXL_175142	GUCY1B3	2983	2255	15	0.00152	1.05	up	1.28002	0.263856	-0.432875
chr4	156680611	156727976	+	GXT_23390695	AK299916	GXL_175142	GUCY1B3	2983	2355	14	0.00107	1.09	up	1.06007	0.268281	-0.446487
chr4	156680178	156727890	+	GXT_23390708	AK296680	GXL_175142	GUCY1B3	2983	2456	15	0.00317	0.97	up	1.28002	0.264365	-0.434985
chr5	67588511	67591571	+	GXT_23390804	AK294919	GXL_5934	PIK3R1	5295	1468	6	4.81e-97	2.07	up	1.53499	-0.000619808	0.487236
chr7	29186200	29552812	+	GXT_23391010	AK294271	GXL_779663	CHN2	1124	2093	14	8.47e-16	3.12	up	1.50673	0.317806	0.933556
chr7	29237357	29552603	+	GXT_23391015	AK294032	GXL_779663	CHN2	1124	1853	13	3.4e-11	2.98	up	1.00386	0.266667	0.977775
chr7	29234541	29552404	+	GXT_23391016	AK293959	GXL_779663	CHN2	1124	1516	14	0.0165	2.54	up	1.65318	0.264487	0.962181
chr8	80523340	80577238	+	GXT_23391055	AK299500	GXL_67197	STMN2	11075	641	5	7.2e-80	5.84	up	1.28082	0.254517	0.855261
chr8	80523356	80578043	+	GXT_23391062	AK297594	GXL_67197	STMN2	11075	1517	6	1.92e-175	5.22	up	1.30152	0.25071	0.866781
chr8	80523368	80578394	+	GXT_23391063	AK297485	GXL_67197	STMN2	11075	943	5	3.96e-124	5.78	up	1.30152	0.247638	0.851819
chr9	124064082	124094941	+	GXT_23391087	AK304675	GXL_185045	GSN	2934	2424	16	3.26e-187	1.46	up	2.86163	-0.436638	0.181079
chr9	129097526	129265553	+	GXT_23391148	AK293740	GXL_185056	FAM125B	89853	1051	10	0.0797	0.49	up	1.00774	-0.490106	0.189017
chr5	133861366	133915164	+	GXT_23391258	AK292635	GXL_27426	PHF15	23338	2779	12	6.19e-20	0.81	up	1.3327	-0.795798	0.0319377
chr17	78444613	78450903	-	GXT_23391580	XM_001490118	GXL_45895	NPTX1	4884	1042	5	1.14e-21	2.18	up	1.18898	-0.630902	-1.80698
chr9	114140549	114214454	-	GXT_23391773	ENSMMUT00000022918	GXL_190011	KIAA0368	23392	3984	40	2.75e-30	0.71	up	1.13067	0.350237	0.977892
chr19	39819117	39826171	-	GXT_23391844	ENSMMUT00000019301	GXL_184516	GMFG	9535	437	7	3.29e-05	2.79	up	1.3052	0.183491	0.637819
chr8	38699875	38706750	+	GXT_23391981	AK019530	GXL_1237350	TACC1	6867	1593	4	2.45e-29	0.94	up	1.15984	0.0480542	0.750623
chr12	133303695	133324820	-	GXT_23392025	AK003234	GXL_66180	ANKLE2	23141	1999	10	1.63e-12	0.49	up	1.92972	0.091304	0.0086399
chr16	3017198	3018582	+	GXT_23392027	AK013685	GXL_167456	KREMEN2	79412	1248	3	0.175	1.1	up	1.18898	-0.184177	-0.439085
chr15	25922421	26108870	-	GXT_23392071	XM_001161533	GXL_225580	ATP10A	57194	6765	22	2.47e-73	1.04	up	1.07049	-0.364985	0.681179
chr17	25783074	25953461	+	GXT_23392114	XR_023110	GXL_316739	KSR1	8844	6088	21	5.91e-11	0.84	up	1.27261	-0.287559	0.34577
chr19	812518	821951	-	GXT_23496615	ENST00000451667	GXL_3356	LPPR3	79948	2272	8	0.0245	2.48	up	3.27493	-1.09594	-0.531612
chr19	2997637	3029165	-	GXT_23496644	ENST00000443826	GXL_3391	TLE2	7089	2503	18	1.06e-61	2.86	up	1.22389	-0.766884	1.01401
chr19	2997637	3029165	-	GXT_23496645	ENST00000447365	GXL_3391	TLE2	7089	2579	20	1.72e-61	2.98	up	1.22389	-0.766835	1.01406
chr19	2997637	3028819	-	GXT_23496646	ENST00000455444	GXL_3391	TLE2	7089	2234	17	3.62e-65	2.78	up	1.22389	-0.752311	0.984933
chr19	2997637	3006558	-	GXT_23496647	ENST00000426948	GXL_3391	TLE2	7089	1088	7	2.67e-23	3.31	up	1.18898	-0.676778	1.17637
chr19	3006420	3029165	-	GXT_23496648	ENST00000439015	GXL_3391	TLE2	7089	1344	13	9.19e-40	2.5	up	1.22389	-0.776713	0.94368
chr19	11495232	11530006	-	GXT_23496750	ENST00000342684	GXL_3538	RGL3	57139	2155	19	1.82e-08	3.43	up	1.49626	-0.346365	0.689216
chr19	11504735	11530006	-	GXT_23496751	ENST00000453604	GXL_3538	RGL3	57139	2283	18	2.98e-12	4.39	up	1.49626	-0.438187	0.999416
chr19	17003765	17137625	-	GXT_23496843	ENST00000388925	GXL_184364	CPAMD8	27151	5355	38	2.29e-77	6.28	up	3.55849	0.0428083	2.67709
chr19	19380809	19384074	-	GXT_23496883	ENST00000431465	GXL_824773	TM6SF2	53345	692	3	0.000118	2.26	up	1.42596	-0.0932529	1.48358
chr19	38701683	38720354	-	GXT_23496962	ENST00000416611	GXL_184333	DPF1	8193	2341	12	4.98e-06	1.08	up	1.4732	-0.94979	-0.0029453
chr19	38702340	38720313	-	GXT_23496963	ENST00000418517	GXL_184333	DPF1	8193	1608	12	1.38e-06	1.32	up	1.4732	-0.941377	0.00845351
chr19	38709268	38713813	-	GXT_23496968	ENST00000438365	GXL_184333	DPF1	8193	523	5	0.00295	1.53	up	1.05476	-0.0640594	1.26502
chr19	43022668	43032601	-	GXT_23497036	ENST00000344391	GXL_189081	CEACAM1	634	1619	5	0.388	2.45	up	1.47504	-0.701406	0.697736
chr19	46272978	46285736	-	GXT_23497078	ENST00000377750	GXL_481200	DMPK	1760	2721	16	3.93e-13	0.43	up	1.1991	-0.573801	-0.193207
chr19	49657043	49658494	-	GXT_23497123	ENST00000434964	GXL_189114	HRC	3270	1364	2	0.776	1.31	up	1.76214	-1.09492	Log of =0
chr19	54973270	54974709	-	GXT_23497269	ENST00000426748	GXL_73787	LENG9	94059	1440	1	5.34e-05	0.7	up	1.4082	-1.40033	0.113447
chr20	3211976	3219855	-	GXT_23497356	ENST00000437836	GXL_122555	SLC4A11	83959	1020	8	8.45e-08	3	up	3.49869	-0.782958	0.395302
chr20	3648621	3662750	-	GXT_23497359	ENST00000428784	GXL_122541	ADAM33	80332	2078	10	0.0741	0.74	up	3.24845	-0.855794	-1.04706
chr20	3648631	3662656	-	GXT_23497360	ENST00000439201	GXL_122541	ADAM33	80332	3064	20	0.069	0.68	up	3.24845	-0.865942	-1.02881
chr20	3648631	3662656	-	GXT_23497361	ENST00000444535	GXL_122541	ADAM33	80332	3272	21	0.14	0.6	up	3.24845	-0.865903	-1.02881
chr20	3653903	3662656	-	GXT_23497362	ENST00000358035	GXL_122541	ADAM33	80332	1313	10	0.175	1.27	up	3.24845	-0.800438	-0.961108
chr20	3653961	3662656	-	GXT_23497363	ENST00000339622	GXL_122541	ADAM33	80332	1214	11	0.201	1.25	up	3.24845	-0.78153	-0.961708
chr21	45917777	46131495	-	GXT_23497650	ENST00000443468	GXL_163681	TSPEAR	54084	3977	12	0.117	2.28	up	1.47504	-0.0747376	-0.312719
chr21	45917777	46131495	-	GXT_23497651	ENST00000397918	GXL_163681	TSPEAR	54084	3530	11	0.117	2.28	up	1.47504	-0.0746321	-0.312748
chr22	24179247	24181199	-	GXT_23497800	ENST00000430614	GXL_249718	DERL3	91319	565	5	0.117	2	up	2.41677	-0.72729	-0.159529
chr22	24376421	24376995	-	GXT_23497811	ENST00000439996	GXL_925664	GSTT1	2952	371	2	0.0235	0.4	up	2.02142	-0.416925	-0.676652
chr22	24615622	24641110	-	GXT_23497815	ENST00000418439	GXL_249853	GGT5	2687	2266	10	0	5.36	up	4.04713	-1.20952	1.22923
chr22	24615622	24641110	-	GXT_23497816	ENST00000438024	GXL_249853	GGT5	2687	1913	8	0	5.39	up	4.04713	-1.20953	1.22923
chr22	24615628	24622080	-	GXT_23497817	ENST00000425408	GXL_249853	GGT5	2687	972	6	0	5.35	up	2.41677	-1.18803	1.61828
chr22	32017040	32024968	-	GXT_23497974	ENST00000422020	GXL_825539	PISD	23761	1015	6	1.16e-109	1.62	up	1.1828	-0.831971	0.429578
chr22	32017848	32022280	-	GXT_23497975	ENST00000442379	GXL_825539	PISD	23761	722	3	4.34e-37	1.83	up	2.72676	-0.531724	0.558025
chr22	32019670	32034431	-	GXT_23497976	ENST00000429683	GXL_825539	PISD	23761	609	4	4.49e-39	1.93	up	2.19617	-0.684152	0.165779
chr22	38480897	38506676	-	GXT_23498108	ENST00000425310	GXL_249668	BAIAP2L2	80115	2097	13	0.00693	0.65	up	1.92972	-0.117048	-0.536457
chr22	38481172	38484945	-	GXT_23498109	ENST00000428572	GXL_249668	BAIAP2L2	80115	751	4	0.00792	0.73	up	2.72676	-0.627735	1.05591
chr22	50702168	50708822	-	GXT_23498310	ENST00000417877	GXL_75102	MAPK11	5600	2409	12	4.3e-05	0.55	up	1.37984	-1.53726	0.0107663
chr22	50965793	50968514	-	GXT_23498336	ENST00000419305	GXL_1229390	TYMP	1890	1062	5	1.7e-32	1.27	up	2.05399	-1.21698	0.650285
chr16	324667	325918	-	GXT_23498443	ENST00000431291	GXL_75847	RGS11	8786	634	4	0.317	1.43	up	3.4541	-0.5203	-0.388193
chr16	31150251	31161415	-	GXT_23498655	ENST00000418068	GXL_133572	PRSS36	146547	2526	14	0.521	0.68	up	1.33909	-0.336782	0.159486
chr17	3575748	3599508	-	GXT_23498810	ENST00000435558	GXL_1225460	P2RX5	5026	1508	12	6.88e-64	3.72	up	1.02809	-0.740544	0.179719
chr17	3593580	3599583	-	GXT_23498811	ENST00000440619	GXL_1225460	P2RX5	5026	958	5	5.4e-42	3.21	up	1.02809	-0.285193	0.131726
chr17	8052748	8055753	-	GXT_23498867	ENST00000413754	GXL_1225476	PER1/VAMP2	-2	1123	6	3.45e-90	2.55	up	1.2647	-0.787461	-0.206726
chr17	55940337	56032684	-	GXT_23499262	ENST00000423592	GXL_35861	CUEDC1	404093	1806	11	4.78e-25	0.63	up	1.2897	-0.480752	0.409071
chr17	56597616	56616574	-	GXT_23499268	ENST00000457347	GXL_35918	2004-09-01	5414	1650	12	0.0051	1.95	up	1.00774	-0.486989	0.601967
chr17	56597624	56606677	-	GXT_23499270	ENST00000417600	GXL_35918	2004-09-01	5414	2265	10	0.00342	2	up	1.12955	-0.329535	0.611921
chr17	56599243	56609411	-	GXT_23499271	ENST00000412945	GXL_35918	2004-09-01	5414	912	6	0.0779	1.69	up	1.31021	-0.514556	0.565818
chr17	61909441	61916041	-	GXT_23499290	ENST00000323347	GXL_35870	SMARCD2	6603	2309	13	4.41e-39	0.84	up	2.005	-1.25886	1.77418
chr17	67074847	67138015	-	GXT_23499329	ENST00000446604	GXL_35913	ABCA6	23460	5157	38	1.2e-213	2.22	up	1.13801	0.0336183	0.532902
chr17	67132135	67138015	-	GXT_23499330	ENST00000420289	GXL_35913	ABCA6	23460	733	4	5.41e-13	2.29	up	1.13801	-0.539181	1.72663
chr18	52568742	52625279	-	GXT_23499551	ENST00000432185	GXL_70904	CCDC68	80323	4023	11	0	4.52	up	2.21353	-0.132111	0.582761
chr20	39833268	39928718	-	GXT_23499695	ENST00000373261	GXL_122662	ZHX3	23051	657	3	0.000117	0.65	up	1.00774	0.118621	1.3241
chr20	39833288	39928718	-	GXT_23499696	ENST00000436440	GXL_122662	ZHX3	23051	803	4	0.000126	0.64	up	1.00774	0.118423	1.32412
chr20	45213987	45242364	-	GXT_23499730	ENST00000420568	GXL_128287	SLC13A3/TP53RK	-2	1256	7	0.253	0.52	up	1.76214	0.0263692	-0.729687
chr20	60898879	60942301	-	GXT_23499805	ENST00000370692	GXL_128313	LAMA5	3911	5802	44	5.25e-11	1.38	up	2.83181	-0.933232	-0.945862
chr12	6747242	6756580	-	GXT_23499867	ENST00000414226	GXL_744156	LPAR5/ACRBP	-2	1787	10	0.729	0.78	up	1.50582	-0.00572294	-0.128575
chr12	53200333	53207842	-	GXT_23500077	ENST00000458244	GXL_193774	KRT4	3851	1946	10	0.776	1.45	up	1.55168	0.0871388	2.49893
chr12	54789047	54812982	-	GXT_23500104	ENST00000435631	GXL_193957	ITGA5	3678	4049	29	1.87e-96	1.05	up	1.14544	-0.49117	0.0183638
chr12	56864736	56881913	-	GXT_23500133	ENST00000424141	GXL_193708	GLS2	27165	2225	17	0.551	1.4	up	1.29279	0.0338728	-0.0728262
chr12	99129338	100378015	-	GXT_23500233	ENST00000329257	GXL_66138	ANKS1B	56899	3747	25	0.625	0.41	up	1.06147	0.382056	0.230358
chr13	46726916	46742654	-	GXT_23500354	ENST00000416500	GXL_159109	LCP1	3936	819	7	0.639	1.16	up	1.50582	0.596745	-0.807304
chr13	48985184	48989946	-	GXT_23500366	ENST00000435430	GXL_159039	LPAR6	10161	2175	2	8.34e-19	1.14	up	1.89008	-0.904147	0.534944
chr13	99461564	99738660	-	GXT_23500430	ENST00000376453	GXL_159092	DOCK9	23348	5398	47	3.14e-40	1.08	up	2.05598	-0.0557973	0.560779
chr14	60062694	60076855	-	GXT_23500579	ENST00000433623	GXL_155893	RTN1	6252	1351	7	4.95e-19	5.75	up	3.39681	0.660187	-1.15757
chr14	75377847	75388911	-	GXT_23500624	ENST00000356237	GXL_101173	RPS6KL1	83694	1019	6	0.582	0.93	up	1.37901	-0.766954	-0.27781
chr15	26086631	26110319	-	GXT_23500778	ENST00000389967	GXL_225580	ATP10A	57194	1186	6	4.41e-38	1.03	up	1.38147	-0.488622	0.264343
chr15	40580100	40600174	-	GXT_23500818	ENST00000456256	GXL_225488	PLCB2	5330	4665	32	0.309	0.65	up	1.75413	-0.521762	-0.217455
chr15	42705022	42749730	-	GXT_23500835	ENST00000434903	GXL_225427	ZFP106	64397	10198	19	6.66e-15	0.53	up	1.15079	0.40717	-0.476942
chr15	64200122	64338521	-	GXT_23500952	ENST00000457488	GXL_189789	DAPK2	23604	1741	12	0.191	0.49	up	2.33234	-0.477094	0.249208
chr15	65345679	65360388	-	GXT_23500961	ENST00000421977	GXL_189806	RASL12	51285	2517	4	0.416	1.27	up	1.00386	-0.250809	-0.160349
chr15	79051546	79103773	-	GXT_23501046	ENST00000438137	GXL_189727	ADAMTS7	11173	4003	15	2.28e-81	1.09	up	1.68145	-0.340712	0.493091
chr15	79069564	79103773	-	GXT_23501047	ENST00000456326	GXL_189727	ADAMTS7	11173	1900	9	1.86e-76	1.02	up	1.68145	-0.0909076	0.611584
chr15	79214092	79237420	-	GXT_23501048	ENST00000444399	GXL_189819	CTSH	1512	1451	13	0.433	0.45	up	2.0116	-0.279318	-0.868812
chr15	93586637	93616266	-	GXT_23501096	ENST00000425933	GXL_189797	RGMA	56963	2936	3	1.22e-15	1.6	up	1.96526	-1.52629	0.623696
chr15	101853227	102029873	-	GXT_23501113	ENST00000331826	GXL_4945	PCSK6	5046	3051	20	4.02e-07	2.87	up	1.75413	0.211751	-0.447369
chr15	101923953	102029873	-	GXT_23501114	ENST00000450401	GXL_4945	PCSK6	5046	1986	10	0.00137	2.74	up	1.75413	0.1975	-0.505269
chr10	3185675	3187901	-	GXT_23501159	ENST00000424714	GXL_227984	PITRM1	10531	482	3	0.000286	0.59	up	1.1673	0.0640635	INF
chr10	22896747	22898646	-	GXT_23501228	ENST00000432610	GXL_691233	PIP4K2A	5305	304	2	0.105	0.58	up	2.0116	0.067362	Log of =0
chr10	28339922	28569071	-	GXT_23501255	ENST00000337532	GXL_227932	MPP7	143098	5080	18	2.74e-10	1.41	up	1.00774	0.359374	0.144526
chr10	46958527	46967710	-	GXT_23501309	ENST00000430007	GXL_227880	SYT15	83849	4225	6	1.27e-24	1.32	up	1.80111	-0.650266	0.218191
chr10	104845940	104860499	-	GXT_23501598	ENST00000423468	GXL_197116	NT5C2	22978	4716	12	1.92e-08	0.41	up	1.00774	0.668669	1.00867
chr11	2904443	2907111	-	GXT_23501738	ENST00000414822	GXL_141073	CDKN1C	1028	2051	3	9.26e-69	5.7	up	2.27832	-0.914235	1.0763
chr11	2904461	2906686	-	GXT_23501740	ENST00000445765	GXL_141073	CDKN1C	1028	1076	3	2.17e-51	5.59	up	2.64192	-0.790241	1.24394
chr11	3108635	3150378	-	GXT_23501747	ENST00000441119	GXL_141014	OSBPL5	114879	1870	17	2.46e-123	1.62	up	1.00774	-0.683783	1.54936
chr11	9041935	9113155	-	GXT_23501813	ENST00000457346	GXL_141071	SCUBE2	57758	3824	23	0.323	0.42	up	1.51895	-0.0393629	-0.504074
chr11	16809215	17035959	-	GXT_23501840	ENST00000448080	GXL_1222889	PLEKHA7	144100	4799	23	1.45e-43	1.65	up	1.95243	-0.144898	0.217191
chr11	44956129	44972267	-	GXT_23501899	ENST00000308220	GXL_140993	TP53I11	9537	888	6	4.98e-09	0.44	up	1.3391	-1.23004	0.0307748
chr11	62369690	62370719	-	GXT_23501969	ENST00000439994	GXL_41525	EML3	256364	661	2	0.00253	0.41	up	2.46518	-2.2857	0.386189
chr11	64506851	64510418	-	GXT_23502003	ENST00000445445	GXL_41560	RASGRP2	10235	956	8	4.43e-05	3.86	up	2.45751	-0.541205	0.447909
chr11	64507108	64511590	-	GXT_23502004	ENST00000431822	GXL_41560	RASGRP2	10235	935	8	7.39e-05	3.8	up	1.00774	-0.551605	0.504855
chr11	64507598	64512303	-	GXT_23502005	ENST00000441258	GXL_41560	RASGRP2	10235	649	7	7.39e-05	3.8	up	1.00774	-0.508351	0.519264
chr11	65142663	65150142	-	GXT_23502049	ENST00000360662	GXL_41500	SLC25A45	283130	2214	6	0.000135	0.9	up	1.03461	-1.09133	-0.532926
chr11	70313961	70507872	-	GXT_23502098	ENST00000449833	GXL_691537	SHANK2	22941	8778	9	2.29e-32	1.18	up	1.4732	-0.899272	-0.388681
chr11	70315540	70348964	-	GXT_23502099	ENST00000424924	GXL_691537	SHANK2	22941	6821	7	1.04e-17	1.08	up	2.43646	-1.30886	-1.14569
chr11	70318924	70507867	-	GXT_23502100	ENST00000412252	GXL_691537	SHANK2	22941	1376	8	0.0032	0.9	up	1.4732	-0.918167	-0.375819
chr11	70803468	70963623	-	GXT_23502106	ENST00000413503	GXL_691537	SHANK2	22941	1282	9	0.0051	1.01	up	1.723	-1.26879	0.289443
chr11	74976482	75062873	-	GXT_23502141	ENST00000393505	GXL_1223408	ARRB1	408	2204	16	0.000229	0.61	up	1.08488	-0.60985	-0.0930213
chr11	75897868	75917574	-	GXT_23502148	ENST00000447195	GXL_161256	WNT11	7481	886	5	0.568	1.23	up	1.91644	-0.588713	-0.387247
chr11	124624141	124632186	-	GXT_23502317	ENST00000435477	GXL_744151	VSIG2	23584	581	4	1	0.64	up	4.05766	0.0370384	-0.655944
chr12	133200348	133263945	-	GXT_23502465	ENST00000455752	GXL_66192	POLE	5426	7848	49	8.86e-15	0.56	up	1.90987	-0.526598	0.208934
chr12	133200348	133215885	-	GXT_23502466	ENST00000434528	GXL_66192	POLE	5426	2419	10	9.15e-08	0.6	up	1.55168	-1.02589	0.928028
chr8	37727905	37757003	-	GXT_23502614	ENST00000343853	GXL_29795	RAB11FIP1	80223	1808	4	0.0315	0.69	up	2.05153	-0.181572	0.102198
chr8	101533002	101542120	-	GXT_23502758	ENST00000395975	GXL_172679	ANKRD46	157567	2527	3	0.000106	0.66	up	1.31317	0.162938	-0.0479152
chr9	84198603	84303596	-	GXT_23503065	ENST00000355002	GXL_31888	TLE1	7088	3266	19	0.000852	0.54	up	1.08185	-0.760476	0.135896
chr9	84198603	84303596	-	GXT_23503066	ENST00000454010	GXL_31888	TLE1	7088	2659	16	0.00394	0.53	up	1.08185	-0.760484	0.135896
chr9	84235369	84303363	-	GXT_23503068	ENST00000418319	GXL_31888	TLE1	7088	936	9	0.15	0.54	up	1.03637	-0.644084	0.146222
chr9	95233013	95244756	-	GXT_23503122	ENST00000450139	GXL_190069	ASPN	54829	537	3	8.57e-18	4.73	up	1.29279	0.147083	0.607064
chr9	130511491	130517309	-	GXT_23503260	ENST00000414380	GXL_12708	SH2D3C	10044	778	3	0.776	1.21	up	1.60402	-0.378743	-0.63238
chr9	134452158	134585229	-	GXT_23503310	ENST00000411834	GXL_12651	RAPGEF1	2889	6061	23	1.2e-47	0.67	up	2.52267	-0.606614	0.325462
chr9	134452158	134585229	-	GXT_23503311	ENST00000357686	GXL_12651	RAPGEF1	2889	6334	25	2.2e-47	0.68	up	2.52267	-0.6066	0.325438
chr9	134452158	134585229	-	GXT_23503312	ENST00000437236	GXL_12651	RAPGEF1	2889	6685	27	1.1e-47	0.67	up	2.52267	-0.606617	0.32544
chr9	134454178	134612925	-	GXT_23503313	ENST00000431470	GXL_12651	RAPGEF1	2889	4324	25	1.82e-32	0.64	up	1.50673	-0.548391	0.355312
chr9	139889257	139891020	-	GXT_23503369	ENST00000456673	GXL_12814	CLIC3	9022	759	6	3.44e-39	1.17	up	1.07054	-2.12796	0.475696
chr9	140342677	140353771	-	GXT_23503385	ENST00000392812	GXL_12690	NELF	26012	2787	13	0	2.06	up	3.28765	-1.62111	1.73735
chr7	1473996	1499109	-	GXT_23504961	ENST00000349486	GXL_12391	MICALL2	79778	3094	17	1.7e-06	0.45	up	1.05949	-1.16431	-0.412463
chr7	29980300	30029821	-	GXT_23505170	ENST00000421434	GXL_12611	SCRN1	9805	1001	5	1.17e-08	0.53	up	1.04033	0.00832944	0.129362
chr7	29983713	30009554	-	GXT_23505172	ENST00000438497	GXL_12611	SCRN1	9805	560	4	8.64e-06	0.54	up	1.24397	-0.0267064	-0.460035
chr7	44102330	44105128	-	GXT_23505280	ENST00000425387	GXL_12510	PGAM2	5224	795	3	2.75e-05	1.78	up	1.55168	0.155637	-1.36775
chr7	44258891	44365255	-	GXT_23505309	ENST00000440254	GXL_12450	CAMK2B	816	2097	21	0.117	2	up	2.83181	-0.187751	-0.797783
chr7	44259016	44365084	-	GXT_23505313	ENST00000353185	GXL_12450	CAMK2B	816	1683	19	0.117	2	up	2.52267	-0.186252	-0.79366
chr7	47342565	47622156	-	GXT_23505349	ENST00000457718	GXL_97690	TNS3	64759	3837	22	0	2.14	up	2.08804	-1.85201	-0.119443
chr7	47474880	47492829	-	GXT_23505354	ENST00000413551	GXL_97690	TNS3	64759	698	5	8.02e-108	2.2	up	2.25172	-1.78032	0.00840692
chr7	77646393	79082871	-	GXT_23505564	ENST00000419488	GXL_97864	MAGI2	9863	6800	21	1.45e-10	0.76	up	1.04883	0.230462	0.19543
chr7	92134201	92146729	-	GXT_23505648	ENST00000422866	GXL_97668	PEX1	5189	735	7	0.224	0.51	up	1.3052	0.337827	1.11271
chr7	100218039	100239173	-	GXT_23505790	ENST00000431692	GXL_182503	TFR2	7036	2631	16	0.13	0.68	up	1.89008	-0.389558	0.409799
chr7	107788082	108096826	-	GXT_23505890	ENST00000379032	GXL_182395	NRCAM	4897	6671	34	6.46e-84	2.64	up	2.8162	0.514634	0.902461
chr7	107788082	108096826	-	GXT_23505891	ENST00000379028	GXL_182395	NRCAM	4897	6659	33	6.46e-84	2.64	up	2.8162	0.514646	0.902457
chr7	107788562	108096765	-	GXT_23505892	ENST00000379024	GXL_182395	NRCAM	4897	5782	30	5.95e-92	2.56	up	2.21999	0.515696	0.906605
chr7	107790355	107880508	-	GXT_23505894	ENST00000425651	GXL_182395	NRCAM	4897	3915	30	3.64e-52	2.54	up	1.50673	0.362477	0.535595
chr7	107791165	108096826	-	GXT_23505897	ENST00000379022	GXL_182395	NRCAM	4897	4182	33	3.55e-53	2.41	up	2.8162	0.511504	0.90602
chr7	107818590	108096829	-	GXT_23505898	ENST00000445979	GXL_182395	NRCAM	4897	3031	22	6.7e-30	2	up	2.8162	0.524909	0.940075
chr7	127990380	128001739	-	GXT_23505995	ENST00000446477	GXL_483632	PRRT4	401399	3427	5	0.0222	2.76	up	4.14179	-0.195862	-0.251953
chr5	132157835	132162280	-	GXT_23506650	ENST00000440998	GXL_103312	SHROOM1	134549	3359	7	2.81e-09	0.6	up	2.34476	-1.10289	0.651776
chr5	132160861	132166351	-	GXT_23506651	ENST00000440118	GXL_103312	SHROOM1	134549	1080	2	0.0153	0.48	up	1.13344	-1.12227	-0.0323425
chr5	138727723	138729087	-	GXT_23506691	ENST00000434752	GXL_483094	LOC389333	389333	1365	1	0.00143	1.48	up	2.48566	-0.989081	-0.0855383
chr5	141692539	141699330	-	GXT_23506715	ENST00000415939	GXL_103106	SPRY4	81848	2204	2	9.22e-42	1	up	1.18843	-1.05478	0.502254
chr5	180621613	180631340	-	GXT_23506821	ENST00000422067	GXL_45253	TRIM7	81786	1953	7	2.72e-05	3.17	up	2.62945	-0.561801	0.48386
chr6	32009126	32015607	-	GXT_23506953	ENST00000426562	GXL_1235006	ATF6B	1388	2508	15	1.56e-09	0.98	up	2.52267	-1.28179	0.606581
chr6	41651717	41702798	-	GXT_23507089	ENST00000420312	GXL_40059	TFEB	7942	2098	9	6.72e-05	0.74	up	1.39021	-1.02905	-0.193243
chr6	41654832	41702139	-	GXT_23507092	ENST00000419396	GXL_40059	TFEB	7942	914	7	0.0193	0.75	up	1.35713	-1.01105	-0.233471
chr6	41655648	41673678	-	GXT_23507094	ENST00000419574	GXL_40059	TFEB	7942	984	5	0.0314	0.77	up	1.3052	-1.17896	-0.201821
chr6	41658632	41701428	-	GXT_23507095	ENST00000424495	GXL_40059	TFEB	7942	377	4	0.0931	1.01	up	1.13801	-0.956746	-0.2992
chr6	41658739	41673678	-	GXT_23507097	ENST00000445214	GXL_40059	TFEB	7942	365	3	0.121	0.94	up	1.3052	-1.12053	-0.308359
chr6	111620234	111804122	-	GXT_23507287	ENST00000434009	GXL_664368	REV3L	5980	10644	34	1.39e-38	0.87	up	1.14445	0.152012	0.361896
chr6	170597253	170599697	-	GXT_23507488	ENST00000406743	GXL_826685	DLL1	28514	1214	4	0.211	1.39	up	1.98576	-0.183048	-1.25209
chr6	30038561	30043566	-	GXT_23507802	ENST00000438868	GXL_43527	RNF39	80352	758	2	0.603	0.9	up	3.39681	0.046061	-0.629156
chr6	30707938	30708368	-	GXT_23508146	ENST00000439396	GXL_43361	FLOT1	10211	246	2	1.87e-06	0.46	up	1.30152	-1.07136	-0.0606232
chr6	30708032	30709110	-	GXT_23508148	ENST00000422714	GXL_43361	FLOT1	10211	416	4	1.89e-10	0.51	up	1.0103	-1.18989	-0.0588123
chr2	25042041	25142055	-	GXT_23508535	ENST00000415879	GXL_75661	ADCY3	109	4232	21	1.38e-78	1.19	up	1.49468	-1.67311	0.495098
chr2	25042041	25142055	-	GXT_23508536	ENST00000447634	GXL_75661	ADCY3	109	4322	22	6.96e-78	1.2	up	1.49468	-1.67311	0.495119
chr2	25048916	25054602	-	GXT_23508537	ENST00000455323	GXL_75661	ADCY3	109	595	5	1.26e-10	1.3	up	1.25172	-0.872849	-0.34406
chr2	25050432	25055054	-	GXT_23508538	ENST00000450524	GXL_75661	ADCY3	109	571	5	6.28e-11	1.39	up	3.39681	-0.989231	-0.527414
chr2	25141521	25142381	-	GXT_23508544	ENST00000438445	GXL_75661	ADCY3	109	572	2	1.19e-11	1.75	up	1.47242	-2.00543	0.533654
chr2	37483841	37499566	-	GXT_23508666	ENST00000452104	GXL_75729	PRKD3	23683	555	5	0.0241	0.42	up	1.3052	0.310559	0.80963
chr3	9908398	9920740	-	GXT_23508819	ENST00000455015	GXL_13795	CIDEC	63924	1123	5	8.42e-44	5.72	up	1.65055	-1.25679	3.14619
chr3	9908713	9920195	-	GXT_23508820	ENST00000430427	GXL_13795	CIDEC	63924	877	6	5.39e-44	5.88	up	1.71092	-1.29937	2.87148
chr3	10327438	10334601	-	GXT_23508828	ENST00000446937	GXL_13876	GHRL	51738	217	2	0.776	1.21	up	2.34476	-0.465582	-0.502381
chr3	24158651	24270497	-	GXT_23508991	ENST00000416811	GXL_744718	THRB	7068	7157	8	8.94e-61	4.01	up	1.15984	-0.104226	1.02537
chr3	24158651	24234603	-	GXT_23508992	ENST00000456926	GXL_744718	THRB	7068	7110	8	2.37e-60	4	up	1.00386	-0.07119	1.14062
chr3	24188209	24536496	-	GXT_23508995	ENST00000413780	GXL_744718	THRB	7068	896	6	0.0251	2.23	up	3.06911	0.0994292	0.580067
chr3	24193899	24536242	-	GXT_23508997	ENST00000447875	GXL_744718	THRB	7068	754	7	0.034	2.36	up	3.12355	0.103399	0.591265
chr3	24193899	24536222	-	GXT_23508998	ENST00000415021	GXL_744718	THRB	7068	671	6	0.0143	2.58	up	3.12355	0.103605	0.590482
chr3	24193922	24536288	-	GXT_23508999	ENST00000431815	GXL_744718	THRB	7068	568	5	0.0518	2.25	up	3.12355	0.103066	0.588496
chr3	24193954	24536773	-	GXT_23509000	ENST00000447414	GXL_744718	THRB	7068	575	5	0.172	1.85	up	3.36879	0.0952064	0.599584
chr3	24231645	24536262	-	GXT_23509001	ENST00000428492	GXL_744718	THRB	7068	539	5	0.172	1.76	up	3.12355	0.114727	0.586887
chr3	31699404	31871566	-	GXT_23509044	ENST00000429492	GXL_13869	OSBPL10	114884	7723	8	9.1e-64	1.05	up	1.50673	-0.190284	0.148053
chr3	46710679	46735191	-	GXT_23509204	ENST00000458221	GXL_13724	ALS2CL	259173	4741	26	1.42e-14	0.8	up	1.24497	-1.18357	-0.515572
chr3	46711772	46735194	-	GXT_23509205	ENST00000434140	GXL_13724	ALS2CL	259173	3937	26	1.51e-10	0.8	up	1.24497	-1.22911	-0.511036
chr3	46712089	46735171	-	GXT_23509207	ENST00000450172	GXL_13724	ALS2CL	259173	6593	22	1.05e-15	0.88	up	1.27625	-1.22286	-0.50204
chr3	46712089	46735166	-	GXT_23509208	ENST00000431015	GXL_13724	ALS2CL	259173	6563	22	8.45e-16	0.88	up	1.27625	-1.22349	-0.502106
chr3	46712090	46729681	-	GXT_23509209	ENST00000423707	GXL_13724	ALS2CL	259173	4471	22	5.4e-16	0.89	up	1.00774	-1.15208	-1.20375
chr3	46713036	46735191	-	GXT_23509210	ENST00000439779	GXL_13724	ALS2CL	259173	2991	25	2.52e-06	0.78	up	1.24497	-1.20555	-0.472384
chr3	47603729	47619623	-	GXT_23509254	ENST00000456150	GXL_13745	CSPG5	10675	2089	4	0.00153	2.41	up	1.1673	-0.157245	0.498034
chr3	48445262	48470872	-	GXT_23509291	ENST00000358459	GXL_13766	PLXNB1	5364	6759	39	6.74e-142	1.91	up	2.04108	-2.01791	1.37533
chr3	48445262	48470872	-	GXT_23509292	ENST00000448774	GXL_13766	PLXNB1	5364	6725	38	3.02e-142	1.91	up	2.04108	-2.01792	1.37534
chr3	48455268	48471594	-	GXT_23509295	ENST00000446431	GXL_13766	PLXNB1	5364	377	4	9.89e-08	1.57	up	1.80251	-2.07565	0.9895
chr3	48601506	48632593	-	GXT_23509316	ENST00000454817	GXL_382925	COL7A1	1294	9047	117	0	2.46	up	2.66524	-0.863185	0.757046
chr3	48667348	48669800	-	GXT_23509324	ENST00000421649	GXL_694083	SLC26A6	65010	910	9	2.15e-82	2.46	up	1.59162	-0.977514	0.899731
chr3	48667885	48669770	-	GXT_23509325	ENST00000444531	GXL_694083	SLC26A6	65010	806	7	2.4e-97	2.59	up	1.59162	-1.21788	0.417733
chr3	48669178	48670813	-	GXT_23509327	ENST00000431213	GXL_694083	SLC26A6	65010	556	5	2.37e-46	2.25	up	3.0673	-0.832107	2.01572
chr3	48669371	48672874	-	GXT_23509328	ENST00000431739	GXL_694083	SLC26A6	65010	588	5	2.58e-47	2.22	up	2.17229	-0.478232	1.30603
chr3	48669452	48672874	-	GXT_23509329	ENST00000426599	GXL_694083	SLC26A6	65010	555	5	8.68e-56	2.22	up	2.17229	-0.741576	1.26337
chr3	111839692	111852117	-	GXT_23509632	ENST00000438451	GXL_171129	GCET2	257144	3464	6	0.551	1.3	up	1.3052	0.114506	-0.113243
chr3	118619483	118824068	-	GXT_23509646	ENST00000426011	GXL_171084	IGSF11	152404	3206	7	0.0282	3.17	up	1.61913	0.828852	0.0891483
chr3	125822408	125899485	-	GXT_23509688	ENST00000455064	GXL_181790	ALDH1L1	10840	2822	21	0.112	2.33	up	2.0257	-0.0251703	-0.24567
chr3	128813958	128841644	-	GXT_23509706	ENST00000457077	GXL_925877	ISY1/RAB43	-2	574	3	0.0449	0.72	up	1.51375	-0.308706	-0.23495
chr4	84216476	84256306	-	GXT_23510155	ENST00000454730	GXL_925980	HPSE	10855	1616	12	3.56e-09	1.88	up	1.3625	0.206307	-0.3605
chr1	20990509	21011677	-	GXT_23510551	ENST00000321188	GXL_34960	KIF17	57576	1803	6	0.00327	1.52	up	2.89782	-0.603985	0.319719
chr1	33789224	33841194	-	GXT_23510697	ENST00000419414	GXL_218271	PHC2	1912	3876	14	9.24e-20	0.56	up	3.90167	-0.267243	0.554284
chr1	33789224	33841194	-	GXT_23510698	ENST00000431992	GXL_218271	PHC2	1912	3786	13	3.88e-20	0.56	up	3.90167	-0.267206	0.55434
chr1	38076951	38100491	-	GXT_23510720	ENST00000445126	GXL_218371	RSPO1	284654	2985	9	3.96e-120	7.12	up	4.8007	-0.297232	1.87977
chr1	38076951	38082349	-	GXT_23510721	ENST00000444395	GXL_218371	RSPO1	284654	2105	5	3.79e-99	7.33	up	1.3052	-0.966821	1.94468
chr2	74491275	74517832	-	GXT_23510914	ENST00000432728	GXL_693763	SLC4A5	57835	905	4	0.262	2.33	up	1.25172	-0.24642	-0.0882523
chr2	122095352	122363636	-	GXT_23511183	ENST00000429969	GXL_241154	CLASP1	23332	7869	38	5.46e-18	0.53	up	1.1673	0.047065	0.759747
chr2	178096518	178129551	-	GXT_23511475	ENST00000430047	GXL_1230619	NFE2L2	4780	453	3	3.18e-14	0.81	up	1.19991	0.124577	0.209401
chr2	183011806	183387103	-	GXT_23511536	ENST00000331935	GXL_241179	PDE1A	5136	1638	14	4.56e-36	3	up	1.18843	0.364325	1.10536
chr2	183050524	183387103	-	GXT_23511537	ENST00000456212	GXL_241179	PDE1A	5136	1659	13	7.89e-37	3.02	up	1.18843	0.383167	1.21539
chr2	197831741	197987457	-	GXT_23511593	ENST00000424317	GXL_1230715	ANKRD44	91526	2798	22	1.78e-08	0.74	up	1.00774	0.26474	0.264437
chr2	213864429	213921821	-	GXT_23511769	ENST00000374327	GXL_89029	IKZF2	22807	8873	4	1.5e-216	2.55	up	3.44176	0.273316	0.315359
chr2	225338627	225360623	-	GXT_23511934	ENST00000454323	GXL_89189	CUL3	8452	688	3	0.00082	0.41	up	1.25172	0.524621	0.321462
chr2	227867427	228029266	-	GXT_23511943	ENST00000329662	GXL_382549	COL4A4	1286	10332	47	1.14e-127	2.93	up	1.9077	-0.00326097	0.0153708
chr2	227867427	228028829	-	GXT_23511944	ENST00000396625	GXL_382549	COL4A4	1286	9895	48	1.68e-126	2.94	up	1.71572	-0.000699731	0.0229774
chr2	239147417	239148211	-	GXT_23512017	ENST00000417803	GXL_88986	HES6	55502	465	2	0.176	0.55	up	2.4337	-0.750336	-0.485804
chr2	239147821	239149303	-	GXT_23512018	ENST00000436051	GXL_88986	HES6	55502	512	4	0.304	0.51	up	2.45751	-1.71166	-0.811615
chr2	239147857	239148642	-	GXT_23512019	ENST00000450098	GXL_88986	HES6	55502	530	2	0.229	0.54	up	2.38485	-1.03313	-0.713852
chr1	145074825	145076077	-	GXT_23512401	ENST00000369345	GXL_152531	PDE4DIP	9659	684	2	0.00114	0.98	up	1.13993	-0.350933	0
chr1	156374044	156399215	-	GXT_23512582	ENST00000400991	GXL_152420	C1orf61	10485	473	3	1	0.52	up	2.83181	0.0580897	-0.338339
chr1	182351669	182360950	-	GXT_23512676	ENST00000435013	GXL_151294	GLUL	2752	3142	7	0	3.81	up	1.19064	-0.634704	1.49562
chr1	182351669	182360508	-	GXT_23512677	ENST00000417584	GXL_151294	GLUL	2752	3205	7	0	3.8	up	1.53064	-0.613874	1.71623
chr1	182542772	182556108	-	GXT_23512678	ENST00000444138	GXL_151173	RNASEL	6041	4148	6	2.13e-07	0.65	up	1.25172	-0.0605796	0.886985
chr1	204101084	204110390	-	GXT_23512753	ENST00000367197	GXL_151196	ETNK2	55224	843	5	9.21e-13	6.05	up	1.00774	0.0358287	0.423542
chr1	204103652	204121307	-	GXT_23512755	ENST00000455266	GXL_151196	ETNK2	55224	1512	7	4.6e-18	4.77	up	3.32967	-0.0604045	1.21334
chr1	204190349	204329044	-	GXT_23512759	ENST00000414478	GXL_151158	PLEKHA6	22874	5091	23	0	5	up	1.37901	-0.735671	0.728589
chr19	1000437	1008927	+	GXT_23512913	ENST00000430019	GXL_316764	GRIN3B	116444	2703	8	0.0166	1.94	up	2.83181	-0.675171	0.00347244
chr19	14183348	14185873	+	GXT_23513088	ENST00000269720	GXL_262507	LOC113230	113230	1424	4	0.0828	0.49	up	2.05022	-1.49002	0.2129
chr19	17392454	17398454	+	GXT_23513116	ENST00000433424	GXL_744381	BABAM1/ANKLE1	-2	2961	8	0.011	1.93	up	1.97906	-0.840743	-0.246087
chr19	17392454	17398454	+	GXT_23513117	ENST00000438921	GXL_744381	BABAM1/ANKLE1	-2	3000	8	0.00517	2.23	up	1.97906	-0.840706	-0.246087
chr19	17862336	17899347	+	GXT_23513123	ENST00000389133	GXL_262523	FCHO1	23149	3127	27	0.677	0.92	up	1.75413	-0.388431	-0.19072
chr19	30302901	30315216	+	GXT_23513175	ENST00000357943	GXL_262426	CCNE1	898	1822	12	7.27e-12	0.99	up	2.69075	-0.110597	-0.564234
chr19	34971874	34992085	+	GXT_23513193	ENST00000270288	GXL_262200	WTIP	126374	2878	10	8.96e-28	0.7	up	2.32492	-0.393321	-0.186291
chr19	42928421	43030020	+	GXT_23513320	ENST00000457234	GXL_262140	ENSG00000213904	0	1500	5	0.729	0.46	up	1.39869	-0.280572	1.31985
chr19	45409048	45412201	+	GXT_23513354	ENST00000446996	GXL_262307	APOE	348	737	4	4.81e-137	5.38	up	1.69108	-0.645132	0.488619
chr19	45409069	45412282	+	GXT_23513355	ENST00000434152	GXL_262307	APOE	348	864	4	5.27e-127	5.11	up	1.69108	-0.650211	0.488224
chr19	45409617	45412211	+	GXT_23513356	ENST00000425718	GXL_262307	APOE	348	923	3	3.95e-137	5.37	up	1.67095	-0.819211	0.436936
chr19	46001731	46005762	+	GXT_23513376	ENST00000424939	GXL_262199	PPM1N	147699	1681	5	0.238	1.35	up	1.1673	-0.192698	0.78879
chr19	46001731	46003942	+	GXT_23513378	ENST00000451287	GXL_262199	PPM1N	147699	1198	4	0.406	1.28	up	1.1673	-0.224662	0.996619
chr20	8639268	8731561	+	GXT_23513754	ENST00000338061	GXL_128243	PLCB1	23236	1856	16	0.0142	0.51	up	1.59527	0.120029	-0.00692214
chr20	30458505	30532764	+	GXT_23513826	ENST00000375922	GXL_132590	TTLL9	164395	2474	15	0.516	0.64	up	1.34647	0.256302	-0.0133007
chr21	33784745	33887699	+	GXT_23513882	ENST00000435323	GXL_163575	C21orf63	59271	1601	6	1.22e-91	2.69	up	1.32359	-0.171765	0.154685
chr21	33784745	33887699	+	GXT_23513883	ENST00000437338	GXL_163575	C21orf63	59271	1745	7	1.14e-86	2.7	up	1.32359	-0.171736	0.154685
chr21	33784861	33887699	+	GXT_23513884	ENST00000457807	GXL_163575	C21orf63	59271	1548	6	2.44e-83	2.67	up	1.30608	-0.170581	0.156438
chr21	39628870	39673412	+	GXT_23513951	ENST00000417813	GXL_176086	KCNJ15	3772	2583	3	5.28e-24	1.33	up	1.3052	-0.171156	0.548312
chr21	46554641	46564597	+	GXT_23514017	ENST00000327861	GXL_1228894	ADARB1	104	159	2	6.18e-19	2.21	up	2.52267	-0.524096	0.111752
chr21	46910189	46933634	+	GXT_23514021	ENST00000342220	GXL_176090	COL18A1	80781	3386	23	4.94e-07	0.49	up	1.89008	-0.804011	-0.600346
chr22	17565849	17590825	+	GXT_23514045	ENST00000425985	GXL_925627	IL17RA	23765	2693	10	1.08e-07	0.49	up	2.15087	-0.856997	0.0493405
chr22	17565980	17590710	+	GXT_23514046	ENST00000399876	GXL_925627	IL17RA	23765	2595	12	1.38e-06	0.45	up	2.16348	-0.870265	0.0231754
chr22	18603874	18613884	+	GXT_23514059	ENST00000416740	GXL_1228979	TUBA8/PEX26	-2	1700	4	0.158	0.96	up	1.59527	-0.232365	0.0665462
chr22	19702052	19710842	+	GXT_23514075	ENST00000406172	GXL_382759	GP1BB	2812	1995	10	1.14e-15	0.83	up	2.22699	-1.06914	0.243313
chr22	19702106	19710008	+	GXT_23514076	ENST00000332481	GXL_382759	GP1BB	2812	1107	11	7.67e-06	0.66	up	2.22699	-1.04991	0.236296
chr22	19702198	19709854	+	GXT_23514079	ENST00000412544	GXL_382759	GP1BB	2812	1107	10	1.09e-05	0.65	up	2.22699	-1.0492	0.232736
chr22	19704743	19711739	+	GXT_23514080	ENST00000455843	GXL_382759	GP1BB	2812	4112	12	1.82e-14	0.79	up	1.94576	-1.21081	0.582589
chr22	23523071	23658142	+	GXT_23514209	ENST00000292697	GXL_75051	BCR	613	3889	19	2.59e-25	0.66	up	1.17429	-0.778977	-0.0530769
chr22	30792930	30811854	+	GXT_23514343	ENST00000428195	GXL_825531	SEC14L2/MTFP1	-2	871	8	1.21e-64	1.85	up	1.21735	-0.306641	0.528727
chr22	30792971	30818421	+	GXT_23514344	ENST00000402592	GXL_825531	SEC14L2/MTFP1	-2	1312	11	3.53e-103	1.8	up	1.23029	-0.188683	0.492714
chr22	30793007	30805466	+	GXT_23514345	ENST00000452649	GXL_825531	SEC14L2/MTFP1	-2	674	6	7.98e-96	1.89	up	1.17572	-0.523031	0.522937
chr22	30793007	30805238	+	GXT_23514346	ENST00000437022	GXL_825531	SEC14L2/MTFP1	-2	556	6	9.21e-43	1.93	up	1.17572	-0.52421	0.51279
chr22	30793007	30805125	+	GXT_23514347	ENST00000416523	GXL_825531	SEC14L2/MTFP1	-2	552	6	1.3e-38	1.79	up	1.17572	-0.54005	0.50107
chr22	30793008	30812300	+	GXT_23514348	ENST00000435690	GXL_825531	SEC14L2/MTFP1	-2	551	5	1.15e-93	1.78	up	1.17572	-0.259495	0.537558
chr22	30793527	30803531	+	GXT_23514349	ENST00000429917	GXL_825531	SEC14L2/MTFP1	-2	565	4	1.28e-29	1.69	up	1.3378	-0.542567	0.419305
chr22	43547905	43557196	+	GXT_23514666	ENST00000428336	GXL_47776	TSPO	706	672	3	3.68e-20	0.5	up	1.27245	-0.73245	0.0430359
chr22	43555232	43558997	+	GXT_23514667	ENST00000445018	GXL_47776	TSPO	706	523	3	8.89e-27	0.52	up	1.00774	-0.442141	-0.324031
chr22	44576770	44602535	+	GXT_23514682	ENST00000444313	GXL_47777	PARVG	64098	1709	14	0.568	1.2	up	1.59527	-0.959688	0.476483
chr22	44579200	44602308	+	GXT_23514688	ENST00000448527	GXL_47777	PARVG	64098	1008	12	0.568	1.2	up	1.50673	-1.02621	0.421686
chr22	45898118	45997014	+	GXT_23514720	ENST00000434362	GXL_47751	FBLN1	2192	2824	17	0	2.68	up	1.78292	-1.51495	0.600025
chr22	45898118	45927204	+	GXT_23514721	ENST00000411478	GXL_47751	FBLN1	2192	568	5	0	2.72	up	1.78292	-1.52106	0.559272
chr22	45898157	45921558	+	GXT_23514722	ENST00000445110	GXL_47751	FBLN1	2192	512	4	0	2.69	up	1.65488	-1.55771	0.594723
chr22	45898712	45928975	+	GXT_23514723	ENST00000455233	GXL_47751	FBLN1	2192	671	5	0	2.7	up	2.02027	-1.55647	0.562356
chr22	45898850	45961581	+	GXT_23514725	ENST00000442170	GXL_47751	FBLN1	2192	2531	15	0	2.71	up	2.17109	-1.4804	0.641597
chr22	45898772	45946495	+	GXT_23514727	ENST00000396034	GXL_47751	FBLN1	2192	1791	14	0	2.71	up	2.08746	-1.50748	0.647135
chr22	45898926	45921443	+	GXT_23514728	ENST00000439835	GXL_47751	FBLN1	2192	572	3	4.11e-199	2.58	up	2.21757	-1.5793	0.595726
chr22	45914462	45927204	+	GXT_23514730	ENST00000454279	GXL_47751	FBLN1	2192	565	4	0	2.72	up	1.34647	-1.48554	0.709236
chr22	46546499	46639653	+	GXT_23514742	ENST00000396000	GXL_316862	PPARA	5465	10048	8	5.12e-16	0.64	up	1.04493	-0.222074	-0.253259
chr16	475668	572478	+	GXT_23514909	ENST00000457159	GXL_167449	RAB11FIP3	9727	4385	15	1.02e-103	1.16	up	1.42225	-0.358639	0.00409961
chr16	476379	572355	+	GXT_23514910	ENST00000434585	GXL_167449	RAB11FIP3	9727	3551	15	2.04e-108	1.16	up	1.23917	-0.350727	0.02281
chr16	777266	797295	+	GXT_23514927	ENST00000389701	GXL_167495	HAGHL	84264	832	7	0.125	0.74	up	2.37055	-0.971586	-0.191811
chr16	777266	779168	+	GXT_23514928	ENST00000389702	GXL_167495	HAGHL	84264	1117	6	0.0027	1.06	up	2.37055	-1.16036	0.274542
chr16	3014217	3018380	+	GXT_23514994	ENST00000435948	GXL_167456	KREMEN2	79412	1936	9	0.0719	1.35	up	2.34476	-0.119203	-0.453939
chr16	3014217	3017702	+	GXT_23514995	ENST00000451815	GXL_167456	KREMEN2	79412	1580	8	0.0959	1.75	up	2.34476	-0.123145	-0.335603
chr16	3194244	3199964	+	GXT_23515006	ENST00000428155	GXL_824222	CASP14L	197350	1433	10	1	0.52	up	1.00774	-0.772604	-0.313563
chr17	1627984	1636973	+	GXT_23515331	ENST00000418841	GXL_45794	WDR81	124997	582	4	0.0123	0.58	up	1.54204	-1.03284	0.330751
chr17	7942358	7951156	+	GXT_23515407	ENST00000413444	GXL_45947	ALOX15B	247	1970	12	2.58e-45	3.03	up	2.29174	-0.612652	0.665636
chr17	21075320	21094731	+	GXT_23515507	ENST00000346603	GXL_102723	DHRS7B	25979	1234	6	5.55e-13	0.65	up	1.12955	-0.186384	0.47613
chr17	21279699	21320404	+	GXT_23515508	ENST00000331718	GXL_744337	KCNJ12	3768	2455	3	0.0098	1.5	up	2.504	-0.718578	-0.694741
chr17	30593195	30651680	+	GXT_23515554	ENST00000431505	GXL_102467	RHBDL3	162494	4561	8	0.262	2.28	up	3.39681	-0.0927276	-0.28311
chr17	48638821	48704431	+	GXT_23515713	ENST00000429973	GXL_8620	CACNA1G	8913	7121	35	2.13e-10	2.53	up	5.11096	-0.608581	0.432699
chr17	48638793	48683833	+	GXT_23515715	ENST00000416767	GXL_8620	CACNA1G	8913	4900	23	5.67e-05	1.98	up	5.12481	-0.569513	0.647157
chr17	48712218	48755443	+	GXT_23515716	ENST00000427959	GXL_8643	ABCC3	8714	3797	24	0	2.56	up	1.85328	-0.900539	0.305403
chr17	54569547	54588630	+	GXT_23515731	ENST00000431215	GXL_824563	ATP2B2	0	1182	3	8.56e-25	3.26	up	1.12955	0.000668072	1.63126
chr17	59477257	59486479	+	GXT_23515753	ENST00000424871	GXL_8752	TBX2	6909	3032	7	1.53e-38	1.05	up	1.31483	-0.976604	0.209753
chr17	61562177	61574979	+	GXT_23515766	ENST00000290863	GXL_8804	ACE	1636	2503	14	7.56e-05	0.52	up	1.94576	-0.346521	-0.911422
chr17	73717516	73753898	+	GXT_23515816	ENST00000455850	GXL_8642	ITGB4	3691	5745	39	7.7e-26	3.81	up	4.62832	-0.954385	0.91847
chr17	73717516	73753898	+	GXT_23515817	ENST00000450894	GXL_8642	ITGB4	3691	5687	39	3.46e-26	3.78	up	4.62832	-0.954385	0.918494
chr17	78977135	78978869	+	GXT_23515870	ENST00000321930	GXL_824609	LOC100129503	100129503	1735	1	3.48e-05	1.21	up	2.52267	-0.0337834	-0.574668
chr17	79373540	79430843	+	GXT_23515875	ENST00000436173	GXL_175481	BAHCC1	57597	7827	31	4.38e-07	0.45	up	1.08191	-0.931834	0.225729
chr18	10454630	10488697	+	GXT_23515931	ENST00000423585	GXL_47342	APCDD1	147495	2362	6	2.16e-42	3.24	up	1.5313	0.249269	-0.0781398
chr18	18822203	19102791	+	GXT_23515951	ENST00000269218	GXL_692705	GREB1L	80000	5725	32	2e-112	3.21	up	4.15759	0.597115	1.40071
chr18	18822203	19048748	+	GXT_23515952	ENST00000431264	GXL_692705	GREB1L	80000	2515	16	8.66e-47	3.23	up	4.15759	0.673643	1.51439
chr20	34679764	34763593	+	GXT_23516112	ENST00000432589	GXL_132646	EPB41L1	2036	210	3	0.00619	0.77	up	1.02705	-0.407393	0.0989243
chr20	34778687	34809866	+	GXT_23516122	ENST00000451082	GXL_132646	EPB41L1	2036	803	8	8.72e-07	0.51	up	1.59527	-0.402976	0.241004
chr20	35515858	35522638	+	GXT_23516126	ENST00000436941	GXL_132664	C20orf118	140711	1448	2	1.55e-202	3.1	up	1.79989	-0.937942	0.191958
chr20	36531544	36572538	+	GXT_23516137	ENST00000448944	GXL_132706	VSTM2L	128434	656	3	1.5e-06	1.58	up	1.56358	-0.118207	-0.383613
chr20	44035237	44037640	+	GXT_23516201	ENST00000458369	GXL_481814	DBNDD2	55861	483	3	3.44e-28	0.99	up	1.20053	-0.596597	-0.0519645
chr20	62724074	62731994	+	GXT_23516331	ENST00000450417	GXL_81817	OPRL1	4987	2940	3	0.0015	1.19	up	1.34647	-0.500485	0.544678
chr20	62724189	62731994	+	GXT_23516332	ENST00000448285	GXL_81817	OPRL1	4987	2868	3	0.00194	1.17	up	1.34647	-0.501964	0.542042
chr12	6309555	6347427	+	GXT_23516367	ENST00000425469	GXL_59643	CD9	928	1233	8	9.12e-29	0.66	up	1.23812	-0.700061	0.40285
chr12	6309555	6344796	+	GXT_23516368	ENST00000382519	GXL_59643	CD9	928	861	5	5.54e-24	0.62	up	1.23812	-0.731195	0.408755
chr12	32655094	32798984	+	GXT_23516459	ENST00000427716	GXL_779190	FGD4	121512	8242	17	1.28e-280	2.42	up	1.79106	-0.740641	1.26685
chr12	32655041	32791846	+	GXT_23516460	ENST00000266482	GXL_779190	FGD4	121512	2637	16	0	2.32	up	1.56711	-0.734462	1.27794
chr12	51318822	51326300	+	GXT_23516528	ENST00000433599	GXL_59476	METTL7A	25840	2895	3	0	2.76	up	1.22042	-0.452618	1.57414
chr12	53443680	53458155	+	GXT_23516554	ENST00000443113	GXL_141690	TENC1	23371	3126	22	3.55e-71	1.21	up	1.4979	-0.687129	-0.218469
chr12	53443680	53458155	+	GXT_23516555	ENST00000451358	GXL_141690	TENC1	23371	4979	30	1.38e-95	1.18	up	1.4979	-0.687141	-0.21849
chr12	53443680	53458155	+	GXT_23516556	ENST00000420340	GXL_141690	TENC1	23371	5003	29	4.46e-94	1.17	up	1.4979	-0.687134	-0.218656
chr12	53443680	53449633	+	GXT_23516557	ENST00000438153	GXL_141690	TENC1	23371	1145	9	3.31e-27	1.25	up	1.4979	-0.748443	0.0580601
chr12	101188735	101522114	+	GXT_23516700	ENST00000299222	GXL_141551	ANO4	121601	3418	27	5.92e-09	4.01	up	1.00386	0.13642	-0.445372
chr13	33590571	33629503	+	GXT_23516759	ENST00000426690	GXL_40582	KL	9365	1658	3	0.484	1.34	up	2.0116	0.259188	0.424497
chr14	37131106	37146094	+	GXT_23517048	ENST00000361487	GXL_691976	PAX9	5083	1652	4	6.2e-11	3.48	up	1.09163	0.555025	-0.0238762
chr14	95053700	95059457	+	GXT_23517204	ENST00000438291	GXL_172865	SERPINA3/SERPINA5	-2	1880	5	0.00352	1.82	up	3.39681	-0.471118	1.2622
chr14	105956200	105958580	+	GXT_23517272	ENST00000427614	GXL_1224938	CRIP1/C14orf80	-2	543	4	0.414	0.47	up	1.45252	-0.622436	0.104599
chr14	105956633	105958940	+	GXT_23517275	ENST00000443229	GXL_1224938	CRIP1/C14orf80	-2	966	5	0.177	0.49	up	1.6353	-0.868502	0.10455
chr14	105994961	105996539	+	GXT_23517282	ENST00000431372	GXL_925063	TMEM121	80757	1520	2	0.0641	0.81	up	4.41677	-0.314528	-0.0807719
chr15	41785591	41794686	+	GXT_23517371	ENST00000425927	GXL_4852	ITPKA	3706	852	6	0.00664	3.16	up	2.60215	-0.351984	-0.323354
chr15	42867914	43013056	+	GXT_23517392	ENST00000290607	GXL_480407	STARD9	57519	15129	32	0.0725	0.51	up	1.03538	-0.398655	0.226351
chr15	59908788	59912202	+	GXT_23517455	ENST00000267857	GXL_5107	GCNT3	9245	2118	2	0.672	0.4	up	1.3052	0.472996	0.423707
chr15	76352299	76497301	+	GXT_23517531	ENST00000305457	GXL_230293	C15orf27	123591	2288	11	2.51e-16	6.33	up	2.06623	0.0478742	0.821434
chr15	78556487	78566843	+	GXT_23517536	ENST00000419495	GXL_230376	DNAJA4	55466	979	5	0.00032	0.82	up	1.4756	0.00263612	-0.0337828
chr15	81489219	81605102	+	GXT_23517554	ENST00000329842	GXL_230287	IL16	3603	8335	19	3.39e-151	2.07	up	2.43646	-0.380536	0.224496
chr15	83477973	83502288	+	GXT_23517565	ENST00000234505	GXL_230391	WHAMM	123720	2858	11	1.26e-08	0.8	up	1.01928	0.447804	-0.32944
chr15	89182035	89193495	+	GXT_23517584	ENST00000379224	GXL_230297	ISG20	3669	555	3	0.405	0.48	up	1.19959	-0.226457	-0.123007
chr15	99645406	99666999	+	GXT_23517624	ENST00000432256	GXL_230349	SYNM	23336	1007	3	0.238	0.64	up	1.02805	0.0399075	-0.331349
chr10	11784445	11797580	+	GXT_23517736	ENST00000420401	GXL_90526	ECHDC3	79746	854	4	0.182	1.25	up	1.5313	-0.0772832	0.521616
chr10	18429666	18828653	+	GXT_23517778	ENST00000352115	GXL_90449	CACNB2	783	1911	14	7.15e-07	3.19	up	4.37008	0.225788	0.886632
chr10	31608145	31818118	+	GXT_23517833	ENST00000361642	GXL_90522	ZEB1	6935	5559	10	1.62e-20	0.54	up	1.14295	0.382387	0.48859
chr10	101089145	101154085	+	GXT_23518104	ENST00000446890	GXL_134270	CNNM1	26507	5455	13	0.0418	0.94	up	1.10075	-0.112175	-0.391279
chr10	101089145	101154085	+	GXT_23518105	ENST00000370528	GXL_134270	CNNM1	26507	5305	12	0.0669	0.88	up	1.10075	-0.112184	-0.391294
chr10	115457184	115490662	+	GXT_23518172	ENST00000452490	GXL_134154	CASP7	840	2344	6	9.98e-06	0.47	up	1.1673	-0.220369	0.0635553
chr10	116853124	117708496	+	GXT_23518183	ENST00000423111	GXL_134139	ATRNL1	26033	8594	28	0.00016	1.35	up	1.08607	0.612726	0.207269
chr10	124266207	124274423	+	GXT_23518211	ENST00000420892	GXL_134147	HTRA1	5654	1214	6	1.06e-88	0.98	up	1.12955	-0.304035	-0.738619
chr11	289138	294664	+	GXT_23518270	ENST00000382625	GXL_123127	ATHL1	80162	1619	10	1.33e-42	1.55	up	3.35525	-1.21307	0.198061
chr11	827618	829187	+	GXT_23518283	ENST00000450828	GXL_123314	EFCAB4A	283229	944	3	0.0712	2.83	up	1.55168	-0.547348	-0.350354
chr11	1855820	1858751	+	GXT_23518304	ENST00000381978	GXL_123160	SYT8	90019	1291	9	0.00453	2.77	up	2.34476	-1.07685	0.266254
chr11	2161731	2169872	+	GXT_23518323	ENST00000445504	GXL_123380	IGF2AS	51214	1944	3	5.97e-51	6.25	up	5.11096	-0.715447	1.41608
chr11	15136484	15268752	+	GXT_23518395	ENST00000424273	GXL_479567	INSC	387755	2750	12	1.38e-129	2.96	up	1.60875	-0.41873	0.604134
chr11	15136484	15263191	+	GXT_23518396	ENST00000443105	GXL_479567	INSC	387755	1660	13	3.75e-54	2.77	up	1.60875	-0.424482	0.621085
chr11	15136484	15199901	+	GXT_23518397	ENST00000434183	GXL_479567	INSC	387755	588	5	1.74e-26	2.95	up	1.60875	-0.500394	0.821408
chr11	44587141	44641313	+	GXT_23518475	ENST00000441195	GXL_170777	CD82	3732	1685	9	2.96e-106	1.65	up	1.51494	-1.23798	-0.128327
chr11	47279174	47281530	+	GXT_23518503	ENST00000457932	GXL_170765	NR1H3	10062	552	4	0.181	0.83	up	2.26519	-0.580832	0.411193
chr11	47279514	47281503	+	GXT_23518508	ENST00000437276	GXL_170765	NR1H3	10062	440	3	0.126	1.02	up	2.13134	-0.549131	0.403358
chr11	48002113	48189670	+	GXT_23518522	ENST00000418331	GXL_170995	PTPRJ	5795	5122	24	3.8e-05	0.4	up	1.3256	-0.063654	0.238052
chr11	48002110	48192393	+	GXT_23518523	ENST00000278456	GXL_170995	PTPRJ	5795	7846	24	3.32e-08	0.45	up	1.29988	-0.0688159	0.231249
chr11	65407592	65418391	+	GXT_23518650	ENST00000394227	GXL_38989	SIPA1	6494	3324	17	8.31e-13	0.69	up	2.52267	-0.653132	-0.0953049
chr11	67183145	67193076	+	GXT_23518676	ENST00000445895	GXL_664114	CARNS1	57571	3865	10	0.268	0.63	up	2.89782	-1.103	0.180783
chr11	82625731	82645697	+	GXT_23518745	ENST00000329143	GXL_38944	C11orf82	220042	3367	4	0.00641	0.56	up	1.13067	0.654054	0.408064
chr11	82625754	82645697	+	GXT_23518746	ENST00000430323	GXL_38944	C11orf82	220042	3226	3	0.00872	0.55	up	1.13067	0.664111	0.407738
chr12	123319497	123341931	+	GXT_23518979	ENST00000452196	GXL_103660	HIP1R	9026	1948	18	6.41e-74	1.87	up	1.19513	-1.43341	0.729974
chr12	124247042	124343815	+	GXT_23518996	ENST00000280576	GXL_664131	DNAH10	196385	6420	37	0.312	1.78	up	1.47774	0.135392	0.766119
chr8	22409251	22433007	+	GXT_23519141	ENST00000434297	GXL_42482	SORBS3	10174	3075	20	2.33e-16	0.47	up	1.69537	-1.07234	0.281319
chr8	27182996	27316903	+	GXT_23519180	ENST00000346049	GXL_42339	PTK2B	2185	4147	31	0	5.09	up	2.65103	-1.57791	2.20192
chr8	69243460	69448062	+	GXT_23519281	ENST00000348340	GXL_67290	C8orf34	116328	3571	7	6.28e-61	3.96	up	2.51463	0.163986	1.18815
chr8	99960401	99964332	+	GXT_23519346	ENST00000457907	GXL_67374	OSR2	116039	1705	4	0.0123	0.99	up	1.21348	-0.279459	-0.0442025
chr8	143808765	143818343	+	GXT_23519393	ENST00000443814	GXL_67202	C8orf55	51337	1954	2	1.09e-10	0.74	up	1.04077	-0.610508	-0.102293
chr9	35792151	35808781	+	GXT_23519480	ENST00000455603	GXL_12750	NPR2	4882	3243	19	1.23e-17	0.53	up	1.34805	-0.239384	-0.0586138
chr9	35805527	35808577	+	GXT_23519481	ENST00000421267	GXL_12750	NPR2	4882	824	7	1.43e-06	0.5	up	1.00774	-0.0100919	0.167671
chr9	71766566	71836012	+	GXT_23519525	ENST00000423935	GXL_926457	TJP2	9414	614	5	0.000193	0.73	up	1.00774	0.0847202	-0.21149
chr9	80879154	80886053	+	GXT_23519550	ENST00000447629	GXL_15264	CEP78	84131	858	5	0.000441	0.75	up	2.83181	0.424271	1.65799
chr9	108061499	108153682	+	GXT_23519641	ENST00000361080	GXL_15212	SLC44A1	23446	4285	15	7.71e-199	1.81	up	2.89782	0.0548452	0.146344
chr9	125133364	125154875	+	GXT_23519709	ENST00000373698	GXL_184939	PTGS1	5742	1946	10	1.13e-233	2.73	up	1.20359	-0.682646	0.386164
chr9	125133467	125145811	+	GXT_23519710	ENST00000426608	GXL_184939	PTGS1	5742	468	6	3.39e-19	2.27	up	1.19362	-0.941786	0.504107
chr9	127539550	127573040	+	GXT_23519731	ENST00000425732	GXL_184892	OLFML2A	169611	2200	7	0	4.34	up	3.19243	-2.04469	1.13163
chr9	130159434	130167834	+	GXT_23519760	ENST00000451404	GXL_184914	SLC2A8	29988	993	7	1.22e-18	1.8	up	1.77634	-1.65987	-0.159855
chr9	130159486	130166346	+	GXT_23519761	ENST00000419917	GXL_184914	SLC2A8	29988	794	6	3.09e-12	1.86	up	2.12537	-1.64611	-0.0970954
chr9	130159507	130169732	+	GXT_23519762	ENST00000373354	GXL_184914	SLC2A8	29988	1318	10	2.29e-17	1.73	up	2.12537	-1.68279	-0.164918
chr9	130159663	130166070	+	GXT_23519764	ENST00000419132	GXL_184914	SLC2A8	29988	506	4	0.00323	1.39	up	1.86412	-1.68601	-0.0811056
chr9	130160462	130167755	+	GXT_23519765	ENST00000423934	GXL_184914	SLC2A8	29988	934	7	6.51e-12	1.67	up	2.11051	-1.74993	-0.085437
chr9	130160462	130167754	+	GXT_23519766	ENST00000439597	GXL_184914	SLC2A8	29988	854	7	1.11e-08	1.59	up	2.11051	-1.75002	-0.0855673
chr9	131684593	131698924	+	GXT_23519809	ENST00000451000	GXL_926498	NUP188/PHYHD1	-2	615	6	0.000668	0.95	up	1.0818	-0.456539	0.28571
chr9	133971917	133998532	+	GXT_23519869	ENST00000372314	GXL_184925	AIF1L	83543	3398	6	0.504	0.61	up	2.83181	-0.335991	-0.272934
chr9	139780517	139804423	+	GXT_23519953	ENST00000429509	GXL_185018	TRAF2	7186	823	6	0.159	0.44	up	1.647	-0.398486	-0.44679
chr9	139874707	139876193	+	GXT_23519963	ENST00000444903	GXL_1238994	PTGDS/LCNL1	-2	369	3	3.77e-41	1.42	up	1.00774	-0.783262	0.376592
chr9	140145713	140147934	+	GXT_23519972	ENST00000416962	GXL_185032	C9orf173	441476	1041	6	0.829	1.04	up	1.60402	-0.667017	-0.179318
chr9	140500129	140509809	+	GXT_23519975	ENST00000405007	GXL_1239001	ARRDC1	92714	1562	8	3.32e-41	1.2	up	2.56688	-0.853797	0.0267538
chr6	7541850	7586805	+	GXT_23521406	ENST00000418664	GXL_156154	DSP	1832	7812	24	1.12e-37	0.58	up	1.1073	0.217779	0.120336
chr7	1578344	1580009	+	GXT_23521551	ENST00000406174	GXL_35034	MAFK	7975	632	3	0.000687	0.43	up	1.29142	-1.59264	-0.554352
chr7	3341080	4308632	+	GXT_23521571	ENST00000389530	GXL_483430	SDK1	221935	10410	45	1.57e-210	3.15	up	2.13204	-0.120929	0.651911
chr7	3341080	4308632	+	GXT_23521572	ENST00000453531	GXL_483430	SDK1	221935	10410	46	1.12e-210	3.18	up	2.13204	-0.120922	0.651907
chr7	3341080	4308632	+	GXT_23521573	ENST00000430484	GXL_483430	SDK1	221935	10350	44	2.32e-210	3.15	up	2.13204	-0.120884	0.651907
chr7	3341080	4308382	+	GXT_23521574	ENST00000420750	GXL_483430	SDK1	221935	6718	46	6.42e-100	2.95	up	2.13204	-0.121042	0.652008
chr7	3341080	4305234	+	GXT_23521575	ENST00000446104	GXL_483430	SDK1	221935	6999	45	5.7e-94	2.97	up	2.13204	-0.119604	0.652624
chr7	6639668	6647482	+	GXT_23521601	ENST00000445375	GXL_35070	C7orf26	79034	675	3	0.00552	0.43	up	1.3052	-0.480053	-0.99771
chr7	30951525	30965131	+	GXT_23521731	ENST00000441328	GXL_744872	AQP1	358	2361	4	2.86e-20	1.47	up	2.25172	-1.17507	-0.156507
chr7	30951525	30965131	+	GXT_23521732	ENST00000413400	GXL_744872	AQP1	358	2511	5	6.11e-21	1.48	up	2.25172	-1.17503	-0.156531
chr7	30951525	30965131	+	GXT_23521733	ENST00000425612	GXL_744872	AQP1	358	2604	5	4.27e-41	1.49	up	2.25172	-1.17503	-0.156581
chr7	75911932	75916605	+	GXT_23522084	ENST00000413003	GXL_33488	SRRM3	222183	2149	4	4.29e-47	3.87	up	2.19617	-0.958019	0.583143
chr7	93220885	93540387	+	GXT_23522247	ENST00000455502	GXL_33599	GNGT1	2792	1943	4	0.0779	2.23	up	1.60402	0.647028	0.85552
chr7	100081550	100092422	+	GXT_23522388	ENST00000423930	GXL_78214	C7orf51	222950	3584	7	8.49e-74	2.38	up	2.87641	-2.09817	0.676888
chr7	139478137	139636106	+	GXT_23522721	ENST00000438104	GXL_316990	TBXAS1	6916	752	7	0.000476	1.67	up	1.49576	-0.0407492	1.01485
chr5	14581884	14612829	+	GXT_23523181	ENST00000274217	GXL_744772	FAM105A	54491	3597	8	1.32e-07	4.25	up	1.30152	0.46603	-0.0125978
chr5	126626539	126760296	+	GXT_23523380	ENST00000418761	GXL_6060	MEGF10	84466	2238	15	0.132	1.55	up	1.97035	0.00563558	0.600301
chr5	133861366	133915164	+	GXT_23523408	ENST00000432594	GXL_27426	PHF15	23338	2784	12	6.19e-20	0.81	up	1.33425	-0.795795	0.0319415
chr5	133861366	133915007	+	GXT_23523409	ENST00000413974	GXL_27426	PHF15	23338	2624	12	1.61e-20	0.81	up	1.33425	-0.801983	0.033068
chr5	133861366	133912594	+	GXT_23523410	ENST00000433412	GXL_27426	PHF15	23338	1940	12	6.65e-15	0.83	up	1.33425	-0.769051	0.0371932
chr5	133861366	133912553	+	GXT_23523411	ENST00000458562	GXL_27426	PHF15	23338	1781	11	3.64e-15	0.85	up	1.33425	-0.767315	0.0373125
chr5	133912456	133915165	+	GXT_23523415	ENST00000430087	GXL_27426	PHF15	23338	1252	2	4.42e-11	0.84	up	1.75413	-0.970854	-0.263047
chr5	149109864	149227267	+	GXT_23523486	ENST00000394320	GXL_926127	PPARGC1B	133522	4803	11	1	0.59	up	1.33322	0.135241	-0.469548
chr6	112375278	112390889	+	GXT_23523986	ENST00000454589	GXL_261205	WISP3	8838	1305	7	0.0867	0.77	up	1.27096	0.436205	-0.354477
chr6	158014041	158066870	+	GXT_23524147	ENST00000340347	GXL_1235753	ZDHHC14	79683	328	4	0.063	1.21	up	1.3052	-0.469883	-0.725838
chr6	32133943	32136054	+	GXT_23524420	ENST00000418563	GXL_694655	PPT2	9374	1143	8	0.0801	0.49	up	1.00774	0.157833	0.0206273
chr6	32133943	32136054	+	GXT_23524421	ENST00000413600	GXL_694655	PPT2	9374	1203	8	0.0764	0.48	up	1.00774	0.157821	0.0206298
chr6	30850723	30858832	+	GXT_23524568	ENST00000448651	GXL_926176	DDR1	780	580	5	0.00722	0.48	up	1.31317	-1.35904	0.27408
chr6	30850868	30858775	+	GXT_23524569	ENST00000453391	GXL_926176	DDR1	780	560	5	0.00688	0.5	up	1.00386	-1.39172	0.294713
chr6	30851556	30867933	+	GXT_23524570	ENST00000429699	GXL_926176	DDR1	780	3968	19	9.52e-14	0.55	up	1.18623	-1.00817	0.245744
chr6	30856166	30867933	+	GXT_23524581	ENST00000419412	GXL_926176	DDR1	780	3832	16	5.12e-14	0.56	up	1.3052	-0.857683	0.705402
chr6	30851556	30859865	+	GXT_23524823	ENST00000426303	GXL_926176	DDR1	780	1118	8	3.64e-05	0.56	up	1.18623	-1.30281	0.296534
chr6	30856166	30859865	+	GXT_23524831	ENST00000433322	GXL_926176	DDR1	780	1093	6	2.76e-05	0.58	up	1.3052	-1.18768	0.836699
chr2	3464072	3482684	+	GXT_23525041	ENST00000437733	GXL_89126	TTC15	51112	518	5	0.0212	0.4	up	1.31317	-0.690648	1.12909
chr2	7057617	7184224	+	GXT_23525051	ENST00000427092	GXL_42186	RNF144A	9781	5560	9	4.52e-26	1.62	up	1.64291	-0.351308	1.08854
[truncated: 3,181 more rows]
