# Supplementary material for: PLZF targets developmental enhancers for activation during osteogenic differentiation of human mesenchymal stem cells
Source: eLife. 2019 Jan 23;8:e40364. doi: 10.7554/eLife.40364 (PMC6344081; doi:10.7554/eLife.40364)
Supplement: Supplementary file 3. [file elife-40364-supp3.xlsx]

## Sheet: deseq2_results_H3K27me3
chr_pos	Chromosome	start	end		Gene Symbol	Accession no					baseMean	log2FoldChange	lfcSE	stat	pvalue	padj	-logPadj	Up/Down	Signif
chr11_113931287_113931287	chr11	113931287	113931287	+	zbtb16	nm_001018011	1742	57	117	24	231.226	-2.27444	0.251292	-9.05097	1.41698e-19	1.16504e-15	14.9337	d	1
chr11_2160204_2160204	chr11	2160204	2160204	-	igf2	nm_000612	1451	19	175	15	162.235	-1.68552	0.258907	-6.51014	7.50799e-11	3.08653e-07	6.51053	d	1
chr11_113930430_113930430	chr11	113930430	113930430	+	zbtb16	nm_006006	1776	69	264	64	279.578	-1.532	0.246145	-6.22396	4.84771e-10	1.32859e-06	5.87661	d	1
chr2_101436612_101436612	chr2	101436612	101436612	+	npas2	nm_002518	481	38	105	19	103.036	-1.46503	0.258036	-5.6776	1.36596e-08	2.80773e-05	4.55164	d	1
chr11_19372270_19372270	chr11	19372270	19372270	+	nav2	nm_001111018	528	54	143	15	127.911	-1.48298	0.263212	-5.63416	1.75911e-08	2.89267e-05	4.5387	d	1
chr7_47694841_47694841	chr7	47694841	47694841	+	c7orf65	nm_001123065	515	27	90	18	90.5493	-1.44044	0.261528	-5.50778	3.63385e-08	4.97959e-05	4.30281	d	1
chr7_127881330_127881330	chr7	127881330	127881330	+	lep	nm_000230	871	58	224	48	182.449	-1.30689	0.241784	-5.40519	6.47383e-08	7.60398e-05	4.11896	d	1
chr2_109930081_109930081	chr2	109930081	109930081	-	mir4266	nr_036224	548	48	143	35	131.233	-1.29487	0.250044	-5.17858	2.2358e-07	0.000229784	3.63868	d	1
chr16_2880172_2880172	chr16	2880172	2880172	+	zg16b	nm_145252	1714	77	537	80	315.411	-1.14443	0.229856	-4.97891	6.39423e-07	0.000584148	3.23348	d	1
chr19_46801632_46801632	chr19	46801632	46801632	+	hif3a	nm_022462	1260	55	351	59	226.174	-1.16407	0.238747	-4.87574	1.08404e-06	0.000891295	3.04998	d	1
chr14_54421270_54421270	chr14	54421270	54421270	-	bmp4	nm_130851	611	22	140	18	96.5221	-1.24642	0.260158	-4.79103	1.65931e-06	0.00113737	2.9441	d	1
chr16_4987136_4987136	chr16	4987136	4987136	-	ppl	nm_002705	638	18	139	15	92.3558	-1.25575	0.262109	-4.79094	1.65998e-06	0.00113737	2.9441	d	1
chr15_28344458_28344458	chr15	28344458	28344458	-	oca2	nm_000275	1428	78	503	76	288.813	-1.09548	0.230905	-4.7443	2.09228e-06	0.00132329	2.87835	d	1
chr9_127563152_127563152	chr9	127563152	127563152	+	olfml2a	nm_001282715	654	27	145	28	111.072	-1.19091	0.257935	-4.61709	3.89167e-06	0.00228552	2.64101	d	1
chr19_18902114_18902114	chr19	18902114	18902114	-	comp	nm_000095	994	31	273	34	157.24	-1.12317	0.248848	-4.51348	6.37716e-06	0.0033663	2.47285	d	1
chr2_109758044_109758044	chr2	109758044	109758044	-	mir4265	nr_036223	356	23	88	15	71.3064	-1.19832	0.265835	-4.50778	6.55081e-06	0.0033663	2.47285	d	1
chr4_57522688_57522688	chr4	57522688	57522688	-	hopx	nm_139211	1275	94	488	98	304.723	-1.01884	0.228981	-4.44944	8.60928e-06	0.00416386	2.3805	d	1
chr8_21988565_21988565	chr8	21988565	21988565	-	hr	nm_018411	1015	27	243	35	151.874	-1.1098	0.253879	-4.37139	1.2346e-05	0.00534259	2.27225	d	1
chr9_123657174_123657174	chr9	123657174	123657174	-	phf19	nm_001286840	580	44	175	45	136.231	-1.07257	0.2489	-4.30923	1.63821e-05	0.00641398	2.19287	d	1
chr11_2161757_2161757	chr11	2161757	2161757	+	igf2-as	nr_028044	1289	26	265	41	177.364	-1.09058	0.257864	-4.22928	2.34442e-05	0.00876175	2.05741	d	1
chr17_5675553_5675553	chr17	5675553	5675553	+	loc339166	nr_040000	728	51	269	48	166.278	-1.02018	0.243964	-4.18167	2.89377e-05	0.0100398	1.99827	d	1
chr11_19781629_19781629	chr11	19781629	19781629	-	mir4694	nr_039843	287	29	89	18	74.5365	-1.10863	0.2653	-4.17879	2.93062e-05	0.0100398	1.99827	d	1
chr1_210407466_210407466	chr1	210407466	210407466	-	sertad4-as1	nr_024337	656	55	250	53	165.98	-0.994188	0.243554	-4.08199	4.46511e-05	0.0146849	1.83313	d	1
chr20_48099181_48099181	chr20	48099181	48099181	-	kcnb1	nm_004975	677	30	221	31	124.579	-1.0125	0.252231	-4.01419	5.96498e-05	0.0188631	1.72439	d	1
chr2_74213530_74213530	chr2	74213530	74213530	+	tet3	nm_001287491	1018	58	387	70	218.462	-0.923775	0.236876	-3.89982	9.62624e-05	0.0293137	1.53293	d	1
chr5_92907049_92907049	chr5	92907049	92907049	-	nr2f1-as1	nr_109825	355	16	80	17	62.8647	-1.0389	0.269019	-3.8618	0.000112556	0.0325121	1.48795	d	1
chr3_12329348_12329348	chr3	12329348	12329348	+	pparg	nm_005037	425	21	125	20	79.9068	-1.01428	0.263157	-3.85429	0.000116066	0.0325121	1.48795	d	1
chr20_43093984_43093984	chr20	43093984	43093984	-	c20orf62	nm_001287807	514	33	143	41	112.846	-0.985748	0.256109	-3.84894	0.000118628	0.0325121	1.48795	d	1
chr15_89346673_89346673	chr15	89346673	89346673	+	acan	nm_013227	879	49	324	60	186.224	-0.919687	0.241085	-3.81478	0.000136302	0.0361507	1.44188	d	1
chr17_63096929_63096929	chr17	63096929	63096929	+	rp11-160o5.1	nr_110801	582	35	218	35	124.594	-0.943896	0.251525	-3.75269	0.000174944	0.0443989	1.35263	d	1
chr1_113051369_113051369	chr1	113051369	113051369	+	wnt2b	nm_024494	578	21	159	27	98.3691	-0.976365	0.260498	-3.74807	0.0001782	0.0443989	1.35263	d	1
chr8_22853360_22853360	chr8	22853360	22853360	+	rhobtb2	nm_001160037	377	30	140	26	91.0802	-0.946545	0.259794	-3.64344	0.00026902	0.0576054	1.23954	d	0
chr19_12863406_12863406	chr19	12863406	12863406	+	best2	nm_017682	1118	52	415	73	222.974	-0.866707	0.238144	-3.63943	0.000273244	0.0576054	1.23954	d	0
chr5_76008227_76008227	chr5	76008227	76008227	+	ncrupar	nr_028375	560	38	224	38	128.375	-0.909423	0.250755	-3.62674	0.000287017	0.0579643	1.23684	d	0
chr11_15136483_15136483	chr11	15136483	15136483	+	insc	nm_001042536	404	29	132	32	94.0512	-0.933189	0.258469	-3.61045	0.00030567	0.0579643	1.23684	d	0
chr2_74120092_74120092	chr2	74120092	74120092	+	actg2	nm_001199893	2021	145	997	182	509.666	-0.79508	0.22054	-3.60515	0.000311978	0.0579643	1.23684	d	0
chr3_9920496_9920496	chr3	9920496	9920496	-	cidec	nm_001199623	265	15	64	15	52.0877	-0.972715	0.27113	-3.58764	0.000333689	0.0596433	1.22444	d	0
chr3_9920740_9920740	chr3	9920740	9920740	-	cidec	nm_022094	256	15	62	15	51.1881	-0.965095	0.271314	-3.55712	0.00037495	0.0643677	1.19133	d	0
chr5_159343739_159343739	chr5	159343739	159343739	+	adra1b	nm_000679	221	25	76	19	63.6407	-0.952037	0.267687	-3.55653	0.000375779	0.0643677	1.19133	d	0
chr2_242912833_242912833	chr2	242912833	242912833	+	ac093642.3	nr_110592	488	43	208	42	129.11	-0.884758	0.250638	-3.53002	0.000415534	0.0683304	1.16539	d	0
chr17_67957847_67957847	chr17	67957847	67957847	+	ac004562.1	nr_110874	1040	122	547	133	341.051	-0.807313	0.230072	-3.50895	0.000449879	0.0701238	1.15413	d	0
chr1_20812728_20812728	chr1	20812728	20812728	-	camk2n1	nm_018584	1349	45	477	72	237.971	-0.8371	0.240552	-3.47992	0.000501566	0.0703331	1.15284	d	0
chr1_27286901_27286901	chr1	27286901	27286901	-	c1orf172	nm_152365	1276	66	596	80	271.789	-0.808819	0.232562	-3.47786	0.000505426	0.0703331	1.15284	d	0
chr2_183731498_183731498	chr2	183731498	183731498	-	frzb	nm_001463	427	41	183	39	118.209	-0.87934	0.253106	-3.47419	0.000512393	0.0703331	1.15284	d	0
chr2_233498206_233498206	chr2	233498206	233498206	+	efhd1	nm_025202	1147	46	478	61	218.023	-0.825658	0.237908	-3.47049	0.000519509	0.0703331	1.15284	d	0
chr17_6459877_6459877	chr17	6459877	6459877	-	pitpnm3	nm_031220	519	25	178	30	101.525	-0.892457	0.257244	-3.4693	0.00052181	0.0703331	1.15284	d	0
chr3_45984972_45984972	chr3	45984972	45984972	+	cxcr6	nm_006564	421	29	140	35	97.4766	-0.892152	0.257807	-3.46055	0.000539083	0.0714894	1.14576	d	0
chr3_52828783_52828783	chr3	52828783	52828783	+	itih3	nm_002217	818	31	289	44	148.978	-0.858505	0.249033	-3.44736	0.000566104	0.073881	1.13147	d	0
chr9_4839768_4839768	chr9	4839768	4839768	+	rcl1	nm_001286701	291	33	128	23	85.4183	-0.906027	0.263908	-3.43311	0.00059669	0.0766561	1.11545	d	0
chr20_56470449_56470449	chr20	56470449	56470449	+	mir4532	nr_039757	1358	76	570	112	302.861	-0.78759	0.230179	-3.42164	0.000622439	0.0782648	1.10643	d	0
chr14_52781015_52781015	chr14	52781015	52781015	+	ptger2	nm_000956	273	19	82	19	61.0089	-0.916967	0.268188	-3.41912	0.00062825	0.0782648	1.10643	d	0
chr1_65775217_65775217	chr1	65775217	65775217	+	dnajc6	nm_001256864	282	24	99	22	70.695	-0.9047	0.265151	-3.41202	0.000644837	0.0791321	1.10165	d	0
chr11_19596856_19596856	chr11	19596856	19596856	+	mir4486	nr_039706	344	20	104	23	71.6831	-0.903273	0.265386	-3.40361	0.000665006	0.0801904	1.09588	d	0
chr17_43325291_43325291	chr17	43325291	43325291	+	map3k14-as1	nr_024434	1118	38	481	48	200.268	-0.818274	0.240643	-3.40036	0.000672967	0.0801904	1.09588	d	0
chr9_91606323_91606323	chr9	91606323	91606323	+	s1pr3	nm_005226	691	46	283	59	163.375	-0.822618	0.243627	-3.37654	0.000734025	0.0862165	1.06441	d	0
chr19_18717660_18717660	chr19	18717660	18717660	-	crlf1	nm_004750	1223	28	377	51	188.782	-0.842882	0.251246	-3.35481	0.000794208	0.0890863	1.05019	d	0
chr19_46800302_46800302	chr19	46800302	46800302	+	hif3a	nm_152795	1230	62	511	92	261.21	-0.783571	0.233659	-3.35348	0.00079801	0.0890863	1.05019	d	0
chrX_19140755_19140755	chrX	19140755	19140755	-	gpr64	nm_001184837	518	45	239	45	138.036	-0.835388	0.249409	-3.34947	0.000809658	0.0890863	1.05019	d	0
chr17_75880169_75880169	chr17	75880169	75880169	-	flj45079	nr_028337	754	44	310	58	167.904	-0.811388	0.243291	-3.33504	0.000852858	0.0922658	1.03496	d	0
chr3_12330435_12330435	chr3	12330435	12330435	+	pparg	nm_138711	411	22	139	26	83.9394	-0.870843	0.261712	-3.32749	0.000876329	0.0935738	1.02885	d	0
chr10_6194225_6194225	chr10	6194225	6194225	-	mir3155b	nr_039698	249	15	72	15	51.4955	-0.891175	0.270963	-3.28892	0.00100573	0.103364	0.985631	d	0
chr6_35182189_35182189	chr6	35182189	35182189	+	scube3	nm_152753	501	29	184	37	108.664	-0.837014	0.255058	-3.28167	0.00103196	0.10475	0.979845	d	0
chr13_114462215_114462215	chr13	114462215	114462215	+	tmem255b	nm_182614	584	43	269	47	144.427	-0.804497	0.247793	-3.24664	0.00116774	0.115691	0.936701	d	0
chr11_1940798_1940798	chr11	1940798	1940798	+	tnnt3	nm_001042782	586	15	201	20	92.1596	-0.849382	0.261621	-3.24661	0.00116788	0.115691	0.936701	d	0
chr7_96293650_96293650	chr7	96293650	96293650	-	rp11-682n22.1	nr_038948	230	21	83	18	59.6265	-0.870516	0.268608	-3.24084	0.00119176	0.116651	0.933112	d	0
chr7_15726308_15726308	chr7	15726308	15726308	-	meox2	nm_005924	986	91	533	103	283.946	-0.755289	0.2334	-3.23603	0.00121206	0.117242	0.930916	d	0
chr9_130159416_130159416	chr9	130159416	130159416	+	slc2a8	nm_014580	1490	75	597	126	320.966	-0.744746	0.23214	-3.20817	0.00133581	0.123405	0.908667	d	0
chr11_2162341_2162341	chr11	2162341	2162341	-	igf2	nm_001127598	1272	29	367	59	196.706	-0.811652	0.254183	-3.19318	0.00140713	0.125755	0.900476	d	0
chr3_46904973_46904973	chr3	46904973	46904973	-	myl3	nm_000258	613	25	234	34	115.792	-0.803957	0.254279	-3.16171	0.00156845	0.133271	0.875266	d	0
chr17_34122640_34122640	chr17	34122640	34122640	-	mmp28	nm_001032278	1058	65	474	96	249.608	-0.73659	0.233608	-3.1531	0.00161546	0.135534	0.867952	d	0
chr15_93616389_93616389	chr15	93616389	93616389	-	rgma	nm_001166286	769	38	316	55	160.932	-0.767084	0.24512	-3.12943	0.00175146	0.144005	0.841623	d	0
chr3_126076236_126076236	chr3	126076236	126076236	-	klf15	nm_014079	831	57	363	85	206.867	-0.73229	0.238013	-3.07668	0.00209318	0.165482	0.781249	d	0
chr8_27183080_27183080	chr8	27183080	27183080	+	ptk2b	nm_173175	304	19	99	24	67.2524	-0.815487	0.266535	-3.05959	0.00221642	0.167662	0.775565	d	0
chr11_70718473_70718473	chr11	70718473	70718473	-	mir3664	nr_037437	583	28	223	41	119.258	-0.771738	0.253343	-3.04622	0.00231739	0.172376	0.763524	d	0
chr1_210406194_210406194	chr1	210406194	210406194	+	sertad4	nm_019605	754	72	385	93	224.564	-0.715937	0.235471	-3.04044	0.00236232	0.172376	0.763524	d	0
chr13_42031541_42031541	chr13	42031541	42031541	+	rgcc	nm_014059	828	32	370	43	157.615	-0.748024	0.246094	-3.03958	0.00236907	0.172376	0.763524	d	0
chr3_46919235_46919235	chr3	46919235	46919235	+	pth1r	nm_000316	529	31	216	42	118.421	-0.764544	0.252523	-3.02762	0.00246491	0.177595	0.750568	d	0
chr3_46449048_46449048	chr3	46449048	46449048	+	ccrl2	nm_001130910	359	32	179	27	95.9296	-0.78698	0.26075	-3.01813	0.00254336	0.178235	0.749006	d	0
chr17_41623305_41623305	chr17	41623305	41623305	-	etv4	nm_001261438	501	39	245	42	128.486	-0.758305	0.251394	-3.0164	0.00255799	0.178235	0.749006	d	0
chr3_46448720_46448720	chr3	46448720	46448720	+	ccrl2	nm_003965	369	31	180	28	96.0512	-0.778877	0.259811	-2.99786	0.00271883	0.187851	0.726187	d	0
chr6_124125068_124125068	chr6	124125068	124125068	+	nkain2	nm_001040214	647	70	354	81	205.358	-0.716363	0.239799	-2.98735	0.00281408	0.192812	0.714867	d	0
chr2_238768186_238768186	chr2	238768186	238768186	+	ramp1	nm_005855	575	35	236	51	132.843	-0.741379	0.249723	-2.96881	0.00298956	0.199728	0.69956	d	0
chr15_31357344_31357344	chr15	31357344	31357344	-	mir211	nr_029624	369	47	199	45	124.991	-0.750832	0.254032	-2.95566	0.00312	0.205221	0.687777	d	0
chr7_73442118_73442118	chr7	73442118	73442118	+	eln	nm_001278939	250	16	95	15	54.8047	-0.792078	0.270069	-2.93287	0.00335841	0.218965	0.659626	d	0
chr5_76011867_76011867	chr5	76011867	76011867	+	f2r	nm_001992	651	32	280	46	136.866	-0.72805	0.24914	-2.92225	0.00347513	0.220576	0.656441	d	0
chr12_29936743_29936743	chr12	29936743	29936743	-	tmtc1	nm_001193451	401	33	167	44	107.189	-0.743276	0.254448	-2.92114	0.00348758	0.220576	0.656441	d	0
chr19_43032661_43032661	chr19	43032661	43032661	-	ceacam1	nm_001024912	934	54	454	78	216.256	-0.689809	0.236696	-2.91433	0.00356454	0.220976	0.655655	d	0
chr10_72141670_72141670	chr10	72141670	72141670	-	lrrc20	nm_207119	549	37	245	51	133.98	-0.719522	0.248719	-2.89291	0.00381685	0.23246	0.633651	d	0
chr1_24649529_24649529	chr1	24649529	24649529	+	grhl3	nm_021180	761	53	362	77	192.62	-0.691014	0.239104	-2.89002	0.00385217	0.232886	0.632856	d	0
chr17_41623800_41623800	chr17	41623800	41623800	-	etv4	nm_001261437	466	36	231	40	119.867	-0.729463	0.252935	-2.88399	0.00392667	0.23348	0.63175	d	0
chr11_113320810_113320810	chr11	113320810	113320810	-	mir4301	nr_036183	886	60	414	93	223.039	-0.679646	0.235976	-2.88015	0.00397489	0.23348	0.63175	d	0
chr19_48059113_48059113	chr19	48059113	48059113	-	znf541	nm_001277075	405	23	181	25	87.8876	-0.749869	0.260709	-2.87627	0.00402408	0.23348	0.63175	d	0
chr10_71211225_71211225	chr10	71211225	71211225	+	tspan15	nm_012339	484	25	185	38	102.937	-0.735528	0.257093	-2.86094	0.00422393	0.241174	0.617669	d	0
chr1_184006863_184006863	chr1	184006863	184006863	-	colgalt2	nm_015101	377	37	174	46	111.668	-0.721621	0.2532	-2.85001	0.00437182	0.24602	0.60903	d	0
chr1_44304293_44304293	chr1	44304293	44304293	+	mir6079	nr_106727	343	19	116	28	73.6879	-0.755346	0.265213	-2.84807	0.00439855	0.24602	0.60903	d	0
chr14_54423554_54423554	chr14	54423554	54423554	-	bmp4	nm_130850	683	34	267	58	146.193	-0.706175	0.249367	-2.83188	0.00462759	0.253932	0.595282	d	0
chr9_84303596_84303596	chr9	84303596	84303596	-	tle1	nm_005077	365	37	206	31	106.698	-0.732805	0.260116	-2.81722	0.00484415	0.258652	0.587283	d	0
chr2_21266945_21266945	chr2	21266945	21266945	-	apob	nm_000384	874	57	405	91	216.709	-0.667863	0.237067	-2.81719	0.00484462	0.258652	0.587283	d	0
chr3_195311076_195311076	chr3	195311076	195311076	-	apod	nm_001647	416	40	224	41	120.577	-0.71358	0.254062	-2.80868	0.00497445	0.26387	0.578609	d	0
chr1_21835857_21835857	chr1	21835857	21835857	+	alpl	nm_001177520	1608	66	666	127	325.924	-0.656566	0.234672	-2.7978	0.00514519	0.267216	0.573138	d	0
chr1_31971838_31971838	chr1	31971838	31971838	+	linc01225	nr_034112	950	56	417	96	224.919	-0.664853	0.237743	-2.79652	0.00516565	0.267216	0.573138	d	0
chr17_71782960_71782960	chr17	71782960	71782960	+	ac125421.1	nr_040020	1131	56	502	98	247.819	-0.657667	0.235992	-2.78681	0.00532289	0.271831	0.565701	d	0
chr20_21684223_21684223	chr20	21684223	21684223	-	loc101929608	nr_109878	1063	48	502	78	223.49	-0.656326	0.23708	-2.76837	0.0056337	0.282823	0.548486	d	0
chr19_46809806_46809806	chr19	46809806	46809806	-	rnu6-66p	nr_046936	427	17	157	26	80.6765	-0.729275	0.263473	-2.76793	0.00564132	0.282823	0.548486	d	0
chr1_47655771_47655771	chr1	47655771	47655771	-	pdzk1ip1	nm_005764	383	24	160	32	88.678	-0.718385	0.259733	-2.76586	0.00567732	0.282903	0.548363	d	0
chr3_58563491_58563491	chr3	58563491	58563491	-	fam107a	nm_001076778	400	24	169	32	90.8323	-0.716281	0.259199	-2.76344	0.00571948	0.283287	0.547774	d	0
chr2_19558372_19558372	chr2	19558372	19558372	-	osr1	nm_145260	404	20	165	27	83.6455	-0.720515	0.26163	-2.75395	0.00588811	0.288167	0.540356	d	0
chr8_27182995_27182995	chr8	27182995	27182995	+	ptk2b	nm_173176	302	19	104	28	69.338	-0.731164	0.266188	-2.7468	0.00601804	0.289492	0.538363	d	0
chr6_30899952_30899952	chr6	30899952	30899952	-	sfta2	nm_205854	367	29	179	32	95.1655	-0.710204	0.258571	-2.74665	0.00602082	0.289492	0.538363	d	0
chr11_45115563_45115563	chr11	45115563	45115563	+	prdm11	nr_046338	331	23	130	32	80.6488	-0.716472	0.262089	-2.7337	0.00626278	0.294021	0.531621	d	0
chr9_91605777_91605777	chr9	91605777	91605777	+	c9orf47	nm_001142413	600	39	274	59	146.688	-0.673582	0.24654	-2.73214	0.00629246	0.294021	0.531621	d	0
chr6_147829827_147829827	chr6	147829827	147829827	+	samd5	nm_001030060	715	55	401	68	190.686	-0.659201	0.241368	-2.7311	0.00631226	0.294021	0.531621	d	0
chr3_32280170_32280170	chr3	32280170	32280170	+	cmtm8	nm_178868	525	34	239	49	126.945	-0.683229	0.250247	-2.73022	0.00632919	0.294021	0.531621	d	0
chr11_60623444_60623444	chr11	60623444	60623444	-	ptgdr2	nm_004778	672	42	306	66	162.121	-0.666183	0.244274	-2.72719	0.00638758	0.295049	0.530106	d	0
chr1_95007413_95007413	chr1	95007413	95007413	-	f3	nm_001178096	886	94	568	108	284.874	-0.640225	0.236948	-2.70197	0.00689302	0.306836	0.513093	d	0
chr12_32655040_32655040	chr12	32655040	32655040	+	fgd4	nm_139241	256	25	110	30	74.4046	-0.711645	0.263483	-2.70091	0.00691501	0.306836	0.513093	d	0
chr6_168476546_168476546	chr6	168476546	168476546	-	frmd1	nm_001122841	1048	50	451	92	226.624	-0.644639	0.239311	-2.69373	0.00706578	0.310091	0.508511	d	0
chr5_134788089_134788089	chr5	134788089	134788089	-	tifab	nm_001099221	872	55	454	81	213.843	-0.637551	0.236782	-2.69257	0.00709038	0.310091	0.508511	d	0
chr17_46894469_46894469	chr17	46894469	46894469	-	ttll6	nm_001130918	657	48	323	72	172.455	-0.647633	0.241785	-2.67855	0.00739428	0.318302	0.49716	d	0
chr6_7727010_7727010	chr6	7727010	7727010	+	bmp6	nm_001718	510	24	193	42	106.316	-0.683596	0.257543	-2.6543	0.00794725	0.331687	0.479272	d	0
chr21_40124181_40124181	chr21	40124181	40124181	-	linc00114	nr_027067	1056	72	533	119	273.571	-0.612855	0.231232	-2.65039	0.00803992	0.33386	0.476436	d	0
chr10_6188278_6188278	chr10	6188278	6188278	+	pfkfb3	nm_001282630	437	17	178	25	82.8597	-0.694566	0.26244	-2.64657	0.00813131	0.335519	0.474283	d	0
chr14_92333880_92333880	chr14	92333880	92333880	-	tc2n	nm_001128596	430	29	198	40	105.52	-0.673729	0.255043	-2.64163	0.00825086	0.337473	0.471761	d	0
chr20_31643229_31643229	chr20	31643229	31643229	+	bpifb3	nm_182658	1395	112	764	182	398.514	-0.587721	0.222972	-2.63585	0.00839272	0.337473	0.471761	d	0
chr10_18429741_18429741	chr10	18429741	18429741	+	cacnb2	nm_201572	826	66	448	97	230.323	-0.618374	0.234664	-2.63515	0.00841012	0.337473	0.471761	d	0
chr19_47524142_47524142	chr19	47524142	47524142	+	npas1	nm_002517	991	31	464	52	181.793	-0.642083	0.243677	-2.63498	0.00841424	0.337473	0.471761	d	0
chr8_29206322_29206322	chr8	29206322	29206322	-	dusp4	nm_057158	784	23	295	46	137.873	-0.668787	0.254665	-2.62615	0.00863572	0.339736	0.468858	d	0
chr2_167232497_167232497	chr2	167232497	167232497	-	scn9a	nm_002977	320	32	179	30	94.145	-0.685706	0.261108	-2.62614	0.00863596	0.339736	0.468858	d	0
chr19_43969831_43969831	chr19	43969831	43969831	-	lypd3	nm_014400	499	25	207	41	107.421	-0.665606	0.255968	-2.60035	0.00931292	0.352861	0.452397	d	0
chr15_93616939_93616939	chr15	93616939	93616939	-	rgma	nm_001166289	783	38	372	62	170.11	-0.632566	0.24357	-2.59706	0.00940252	0.354622	0.450235	d	0
chr10_18429605_18429605	chr10	18429605	18429605	+	cacnb2	nm_201593	816	63	442	94	223.963	-0.610207	0.235293	-2.5934	0.00950335	0.356788	0.44759	d	0
chr5_127873735_127873735	chr5	127873735	127873735	-	fbn2	nm_001999	561	23	227	40	111.259	-0.663714	0.256148	-2.59113	0.009566	0.357508	0.446715	d	0
chr10_6186842_6186842	chr10	6186842	6186842	+	pfkfb3	nm_001145443	403	19	180	25	82.7425	-0.677841	0.261929	-2.58788	0.00965694	0.357655	0.446536	d	0
chr16_2892752_2892752	chr16	2892752	2892752	-	prss30p	nr_026864	632	39	297	63	153.082	-0.631104	0.245716	-2.56843	0.0102161	0.366799	0.435571	d	0
chr4_134070469_134070469	chr4	134070469	134070469	+	pcdh10	nm_032961	1319	69	651	124	303.641	-0.590356	0.230549	-2.56065	0.0104477	0.367764	0.434431	d	0
chr1_2706230_2706230	chr1	2706230	2706230	-	ttc34	nm_001242672	571	20	244	33	106.705	-0.657863	0.256918	-2.56059	0.0104493	0.367764	0.434431	d	0
chr1_2564481_2564481	chr1	2564481	2564481	-	mmel1	nm_033467	768	30	332	55	152.452	-0.630896	0.248621	-2.53758	0.011162	0.383993	0.415677	d	0
chr19_51413994_51413994	chr19	51413994	51413994	-	klk4	nm_004917	1206	71	658	115	293.518	-0.580704	0.229616	-2.52902	0.0114382	0.389842	0.409111	d	0
chr21_44751919_44751919	chr21	44751919	44751919	-	linc00322	nr_103713	446	19	205	26	88.8392	-0.658371	0.26044	-2.52791	0.0114743	0.389842	0.409111	d	0
chr3_187420153_187420153	chr3	187420153	187420153	+	loc100131635	nr_034062	445	37	237	48	123.544	-0.631508	0.251202	-2.51394	0.011939	0.403961	0.393661	d	0
chr20_21686296_21686296	chr20	21686296	21686296	+	pax1	nm_006192	1178	39	515	78	222.873	-0.606214	0.241867	-2.5064	0.0121969	0.407727	0.389631	d	0
chr14_38677203_38677203	chr14	38677203	38677203	+	sstr1	nm_001049	1157	48	556	88	240.299	-0.592303	0.236676	-2.50258	0.012329	0.409642	0.387596	d	0
chr14_54415202_54415202	chr14	54415202	54415202	-	mir5580	nr_049843	419	23	173	38	94.2044	-0.645971	0.259216	-2.49202	0.0127019	0.414426	0.382553	d	0
chr12_69326979_69326979	chr12	69326979	69326979	-	cpm	nm_198320	290	22	137	27	74.4667	-0.653344	0.263765	-2.47699	0.0132497	0.423408	0.373241	d	0
chr13_21007985_21007985	chr13	21007985	21007985	-	mir4499	nr_039721	421	27	200	39	102.068	-0.633797	0.25597	-2.47606	0.0132843	0.423408	0.373241	d	0
chr11_10715121_10715121	chr11	10715121	10715121	-	mrvi1	nm_001100167	227	18	100	21	58.5519	-0.664916	0.268576	-2.47571	0.0132973	0.423408	0.373241	d	0
chr12_108714439_108714439	chr12	108714439	108714439	-	cmklr1	nm_001142345	382	21	149	36	85.7771	-0.645592	0.261965	-2.46442	0.0137235	0.429028	0.367515	d	0
chr3_9258578_9258578	chr3	9258578	9258578	+	srgap3-as3	nr_103443	374	27	165	42	96.5886	-0.633638	0.257516	-2.46058	0.0138714	0.429214	0.367326	d	0
chr20_31669317_31669317	chr20	31669317	31669317	+	bpifb4	nm_182519	1341	90	710	160	352.563	-0.555878	0.226457	-2.45467	0.0141013	0.433115	0.363397	d	0
chr9_126131057_126131057	chr9	126131057	126131057	+	crb2	nr_104603	974	27	384	59	171.724	-0.615845	0.251066	-2.45292	0.0141703	0.433115	0.363397	d	0
chr2_96991944_96991944	chr2	96991944	96991944	+	itpripl1	nm_001163524	913	44	432	81	201.763	-0.587528	0.240373	-2.44423	0.0145161	0.435246	0.361265	d	0
chr15_69591293_69591293	chr15	69591293	69591293	+	paqr5	nm_017705	1047	49	506	91	229.659	-0.577648	0.237378	-2.43345	0.0149558	0.443217	0.353383	d	0
chr17_71824676_71824676	chr17	71824676	71824676	-	linc00469	nr_027146	369	22	168	32	85.7985	-0.633811	0.260536	-2.43272	0.0149859	0.443217	0.353383	d	0
chr17_48712217_48712217	chr17	48712217	48712217	+	abcc3	nm_001144070	353	18	152	27	75.9542	-0.638376	0.26377	-2.4202	0.0155122	0.452586	0.344298	d	0
chr19_6670599_6670599	chr19	6670599	6670599	-	tnfsf14	nm_003807	612	40	350	53	152.786	-0.596251	0.246692	-2.41698	0.0156498	0.452586	0.344298	d	0
chr12_52306112_52306112	chr12	52306112	52306112	+	acvrl1	nm_001077401	285	23	149	25	75.4283	-0.638266	0.264347	-2.4145	0.0157567	0.452586	0.344298	d	0
chr6_31088252_31088252	chr6	31088252	31088252	-	cdsn	nm_001264	356	17	163	23	74.1194	-0.638094	0.264355	-2.41377	0.0157882	0.452586	0.344298	d	0
chr19_1513188_1513188	chr19	1513188	1513188	-	adamtsl5	nm_213604	603	24	282	40	120.662	-0.610398	0.253043	-2.41223	0.0158554	0.452586	0.344298	d	0
chr2_96991934_96991934	chr2	96991934	96991934	+	itpripl1	nm_178495	913	44	434	82	202.39	-0.578942	0.240389	-2.40836	0.0160244	0.452586	0.344298	d	0
chr12_20522178_20522178	chr12	20522178	20522178	+	pde3a	nm_000921	199	19	98	19	56.4398	-0.64912	0.269628	-2.40746	0.0160638	0.452586	0.344298	d	0
chr22_37750879_37750879	chr22	37750879	37750879	-	loc100506271	nr_110515	1752	141	1096	222	509.829	-0.529711	0.220071	-2.407	0.0160842	0.452586	0.344298	d	0
chr2_26403584_26403584	chr2	26403584	26403584	+	gareml	nm_001191033	410	15	197	19	77.1748	-0.635191	0.264237	-2.40387	0.0162225	0.452586	0.344298	d	0
chr3_50192847_50192847	chr3	50192847	50192847	+	sema3f	nm_004186	413	22	207	29	91.385	-0.622881	0.259437	-2.40089	0.0163552	0.452586	0.344298	d	0
chr2_20866423_20866423	chr2	20866423	20866423	+	gdf7	nm_182828	1789	68	865	137	364.829	-0.552974	0.230397	-2.40009	0.0163908	0.452586	0.344298	d	0
chr7_994319_994319	chr7	994319	994319	-	adap1	nm_006869	1160	37	577	68	219.85	-0.573958	0.23927	-2.39878	0.0164497	0.452586	0.344298	d	0
chr19_45430059_45430059	chr19	45430059	45430059	+	apoc1p1	nr_028414	463	20	200	34	94.6197	-0.620918	0.259264	-2.39492	0.0166238	0.452586	0.344298	d	0
chr7_30951414_30951414	chr7	30951414	30951414	+	aqp1	nm_198098	1064	29	419	66	187.644	-0.599153	0.250251	-2.39421	0.016656	0.452586	0.344298	d	0
chr15_83382745_83382745	chr15	83382745	83382745	-	ac105339.1	nr_034139	888	68	504	108	247.628	-0.55733	0.232865	-2.39336	0.0166948	0.452586	0.344298	d	0
chr7_30960914_30960914	chr7	30960914	30960914	+	aqp1	nm_001185060	360	21	156	33	83.256	-0.625763	0.261552	-2.3925	0.0167339	0.452586	0.344298	d	0
chr20_3218373_3218373	chr20	3218373	3218373	-	slc4a11	nm_032034	1449	33	648	71	245.789	-0.577973	0.242098	-2.38735	0.0169702	0.455978	0.341057	d	0
chr19_10543110_10543110	chr19	10543110	10543110	+	pde4a	nm_001111309	345	15	141	24	69.32	-0.633838	0.266112	-2.38184	0.0172263	0.458126	0.339015	d	0
chr22_19512860_19512860	chr22	19512860	19512860	-	cldn5	nm_003277	1365	35	659	69	241.521	-0.569644	0.239262	-2.38084	0.0172731	0.458126	0.339015	d	0
chr6_157950163_157950163	chr6	157950163	157950163	+	mir3692	nr_037463	1052	105	682	150	340.668	-0.543101	0.228728	-2.37444	0.0175757	0.458782	0.338394	d	0
chr3_187420345_187420345	chr3	187420345	187420345	-	rtp2	nm_001004312	417	36	235	46	118.983	-0.599756	0.252612	-2.37421	0.0175865	0.458782	0.338394	d	0
chr8_42552561_42552561	chr8	42552561	42552561	+	chrnb3	nm_000749	244	20	117	24	65.21	-0.630944	0.26659	-2.36672	0.0179467	0.462271	0.335104	d	0
chr22_51113069_51113069	chr22	51113069	51113069	+	shank3	nm_033517	1689	78	937	139	376.192	-0.533112	0.225553	-2.36357	0.0180996	0.462809	0.334599	d	0
chr8_139509065_139509065	chr8	139509065	139509065	-	fam135b	nm_015912	701	36	342	63	158.892	-0.57879	0.245497	-2.35763	0.0183919	0.463853	0.33362	d	0
chr2_101767846_101767846	chr2	101767846	101767846	-	tbc1d8	nm_001102426	502	27	231	46	114.467	-0.596876	0.253933	-2.35052	0.0187471	0.464327	0.333176	d	0
chr17_26646120_26646120	chr17	26646120	26646120	+	tmem97	nm_014573	422	23	193	37	95.7364	-0.606397	0.258167	-2.34886	0.0188309	0.464327	0.333176	d	0
chr12_53817638_53817638	chr12	53817638	53817638	+	amhr2	nm_001164690	285	17	126	24	65.6259	-0.621166	0.266533	-2.33054	0.0197774	0.473439	0.324736	d	0
chr17_43339479_43339479	chr17	43339479	43339479	-	spata32	nm_152343	626	22	225	50	119.627	-0.604517	0.259454	-2.32996	0.0198082	0.473439	0.324736	d	0
chr17_7328934_7328934	chr17	7328934	7328934	+	c17orf74	nm_175734	321	22	166	27	79.4923	-0.611105	0.262685	-2.32638	0.0199982	0.473954	0.324264	d	0
chr11_72494574_72494574	chr11	72494574	72494574	+	mir4692	nr_039841	544	26	254	45	118.179	-0.588663	0.253296	-2.32401	0.020125	0.473954	0.324264	d	0
chr20_3219887_3219887	chr20	3219887	3219887	-	slc4a11	nm_001174089	1521	32	635	76	251.497	-0.570212	0.245544	-2.32224	0.0202201	0.473954	0.324264	d	0
chr15_93617216_93617216	chr15	93617216	93617216	-	rgma	nm_001166283	786	40	400	70	178.863	-0.561979	0.24223	-2.32002	0.0203396	0.473954	0.324264	d	0
chr1_3371146_3371146	chr1	3371146	3371146	+	arhgef16	nm_014448	1605	43	749	92	288.912	-0.551022	0.2376	-2.31911	0.0203889	0.473954	0.324264	d	0
chr6_32077151_32077151	chr6	32077151	32077151	-	tnxb	nm_019105	685	27	278	57	138.291	-0.587795	0.253483	-2.31887	0.0204019	0.473954	0.324264	d	0
chr15_84322837_84322837	chr15	84322837	84322837	+	adamtsl3	nm_207517	679	44	377	68	172.227	-0.561328	0.242154	-2.31807	0.0204457	0.473954	0.324264	d	0
chr17_43339446_43339446	chr17	43339446	43339446	+	map3k14-as1	nr_024435	624	22	226	50	119.553	-0.601043	0.259346	-2.31753	0.0204748	0.473954	0.324264	d	0
chr1_201979689_201979689	chr1	201979689	201979689	+	elf3	nm_004433	300	18	155	20	68.7752	-0.617106	0.266376	-2.31667	0.0205215	0.473954	0.324264	d	0
chr17_8027410_8027410	chr17	8027410	8027410	-	hes7	nm_032580	577	22	261	40	114.288	-0.590293	0.255123	-2.31375	0.0206812	0.474109	0.324122	d	0
chr4_8582216_8582216	chr4	8582216	8582216	+	gpr78	nm_080819	1732	87	957	161	402.379	-0.516817	0.224435	-2.30275	0.0212931	0.478603	0.320024	d	0
chr7_995043_995043	chr7	995043	995043	-	adap1	nm_001284308	1183	39	613	72	229.1	-0.547684	0.237861	-2.30254	0.0213049	0.478603	0.320024	d	0
chr7_30961104_30961104	chr7	30961104	30961104	+	aqp1	nm_001185061	363	22	163	36	86.6903	-0.59461	0.260526	-2.28234	0.0224692	0.495286	0.305144	d	0
chr11_61685081_61685081	chr11	61685081	61685081	-	rab3il1	nm_013401	397	15	150	30	77.0114	-0.602799	0.265663	-2.26903	0.0232664	0.506076	0.295784	d	0
chr13_40794639_40794639	chr13	40794639	40794639	-	linc00548	nr_033877	179	18	97	16	52.1584	-0.615181	0.271326	-2.26731	0.0233712	0.506308	0.295585	d	0
chr11_2906995_2906995	chr11	2906995	2906995	-	cdkn1c	nm_001122630	679	20	321	37	123.93	-0.573514	0.253819	-2.25954	0.0238497	0.512054	0.290684	d	0
chr9_138073454_138073454	chr9	138073454	138073454	+	loc401557	nr_046107	803	45	437	76	192.295	-0.541451	0.239634	-2.25949	0.0238527	0.512054	0.290684	d	0
chr2_95963071_95963071	chr2	95963071	95963071	+	kcnip3	nm_013434	1177	55	582	110	262.707	-0.531012	0.235279	-2.25695	0.0240115	0.512451	0.290348	d	0
chr22_48972117_48972117	chr22	48972117	48972117	+	fam19a5	nm_015381	932	28	502	47	174.414	-0.551309	0.244356	-2.25617	0.0240598	0.512451	0.290348	d	0
chr7_30961118_30961118	chr7	30961118	30961118	+	aqp1	nm_001185062	362	22	165	36	86.784	-0.586959	0.260435	-2.25376	0.0242111	0.512451	0.290348	d	0
chr2_242088919_242088919	chr2	242088919	242088919	-	pask	nm_001252122	210	20	120	18	60.015	-0.607378	0.269695	-2.2521	0.0243162	0.512451	0.290348	d	0
chr2_96991068_96991068	chr2	96991068	96991068	+	itpripl1	nm_001163523	1108	68	644	115	280.728	-0.518297	0.230458	-2.24898	0.0245135	0.512451	0.290348	d	0
chr2_96991061_96991061	chr2	96991061	96991061	+	itpripl1	nm_001008949	1111	68	646	115	281.144	-0.518119	0.230434	-2.24845	0.0245474	0.512451	0.290348	d	0
chr7_30791750_30791750	chr7	30791750	30791750	+	inmt	nm_006774	278	23	134	33	77.1789	-0.589541	0.262572	-2.24525	0.024752	0.512451	0.290348	d	0
chr9_112083244_112083244	chr9	112083244	112083244	-	epb41l4b	nm_019114	853	68	527	103	244.548	-0.526038	0.234325	-2.24491	0.0247738	0.512451	0.290348	d	0
chr6_30908776_30908776	chr6	30908776	30908776	+	dpcr1	nm_080870	464	19	193	37	94.2242	-0.584743	0.260533	-2.24441	0.024806	0.512451	0.290348	d	0
chr2_242088987_242088987	chr2	242088987	242088987	+	ppp1r7	nm_001282412	208	19	118	17	58.0026	-0.605059	0.270148	-2.23973	0.0251083	0.517394	0.286179	d	0
chr21_46340965_46340965	chr21	46340965	46340965	-	itgb2	nm_000211	356	18	165	28	77.7816	-0.589103	0.263146	-2.23869	0.025176	0.517492	0.286096	d	0
chr7_15728002_15728002	chr7	15728002	15728002	+	ac005550.4	nr_110094	778	60	466	93	218.867	-0.528643	0.236271	-2.23744	0.0252574	0.517872	0.285778	d	0
chr12_133187037_133187037	chr12	133187037	133187037	-	lrcol1	nm_001195520	1369	55	737	104	288.971	-0.51655	0.231888	-2.22758	0.0259083	0.525964	0.279044	d	0
chr17_26800663_26800663	chr17	26800663	26800663	+	slc13a2	nr_027384	1588	99	890	186	410.944	-0.497517	0.223876	-2.22229	0.026264	0.527126	0.278085	d	0
chr2_42275160_42275160	chr2	42275160	42275160	+	pkdcc	nm_138370	547	27	277	45	121.649	-0.559956	0.25201	-2.22196	0.0262858	0.527126	0.278085	d	0
chr21_40349700_40349700	chr21	40349700	40349700	-	af064858.7	nr_109962	878	70	556	105	252.444	-0.51683	0.233937	-2.20926	0.0271563	0.537225	0.269844	d	0
chr21_46340949_46340949	chr21	46340949	46340949	+	itgb2-as1	nr_038316	355	18	167	28	77.8753	-0.581139	0.263089	-2.2089	0.0271814	0.537225	0.269844	d	0
chr2_233320832_233320832	chr2	233320832	233320832	+	alpi	nm_001631	1285	55	694	104	278.454	-0.512301	0.232424	-2.20417	0.0275125	0.541217	0.266628	d	0
chr2_232395182_232395182	chr2	232395182	232395182	-	nmur1	nm_006056	915	36	427	75	188.978	-0.537572	0.244345	-2.20005	0.0278034	0.54203	0.265976	d	0
chr19_51273720_51273720	chr19	51273720	51273720	+	gpr32	nm_001506	440	25	252	32	102.513	-0.56488	0.257299	-2.19542	0.0281332	0.542984	0.265213	d	0
chr8_95220815_95220815	chr8	95220815	95220815	-	cdh17	nm_004063	435	50	281	64	149.731	-0.544218	0.248029	-2.19417	0.0282233	0.543446	0.264843	d	0
chr4_66535678_66535678	chr4	66535678	66535678	+	rp11-807h7.1	nr_034138	907	54	497	97	226.43	-0.515396	0.235763	-2.18608	0.0288101	0.548326	0.260961	d	0
chr8_1765396_1765396	chr8	1765396	1765396	+	mir596	nr_030326	471	17	219	30	91.4366	-0.568857	0.26033	-2.18514	0.0288783	0.548354	0.260939	d	0
chr5_135528851_135528851	chr5	135528851	135528851	-	loc389332	nr_024418	1033	50	602	84	234.952	-0.512494	0.235214	-2.17884	0.0293436	0.554159	0.256366	d	0
chr3_46506632_46506632	chr3	46506632	46506632	-	ltf	nm_002343	1719	105	969	201	442.523	-0.485589	0.22291	-2.17841	0.0293758	0.554159	0.256366	d	0
chr12_29937692_29937692	chr12	29937692	29937692	-	tmtc1	nm_175861	458	49	282	69	152.711	-0.533117	0.245713	-2.16968	0.0300314	0.557915	0.253432	d	0
chr12_29650619_29650619	chr12	29650619	29650619	-	ovch1	nm_183378	308	23	148	36	82.1749	-0.566228	0.261213	-2.16768	0.0301829	0.558927	0.252645	d	0
chr1_3607235_3607235	chr1	3607235	3607235	+	tp73	nm_001126240	1153	36	645	64	222.176	-0.515255	0.23824	-2.16276	0.0305598	0.560138	0.251705	d	0
chr17_63133455_63133455	chr17	63133455	63133455	+	rgs9	nm_003835	1130	85	694	143	320.347	-0.491642	0.227479	-2.16126	0.0306749	0.560138	0.251705	d	0
chr10_123748688_123748688	chr10	123748688	123748688	+	tacc2	nm_206862	426	26	228	39	103.687	-0.552127	0.255678	-2.15946	0.0308142	0.560138	0.251705	d	0
chr7_94285521_94285521	chr7	94285521	94285521	-	sgce	nm_003919	382	32	244	36	107.523	-0.556208	0.257594	-2.15924	0.0308312	0.560138	0.251705	d	0
chr6_46459060_46459060	chr6	46459060	46459060	-	rcan2	nm_001251974	493	55	313	77	169.201	-0.52577	0.243549	-2.15878	0.0308671	0.560138	0.251705	d	0
chr2_242089072_242089072	chr2	242089072	242089072	+	ppp1r7	nm_002712	202	18	115	17	56.0334	-0.582319	0.270373	-2.15376	0.031259	0.562464	0.249905	d	0
chr20_61297973_61297973	chr20	61297973	61297973	-	rp11-93b14.5	nr_024470	690	22	306	47	130.485	-0.547452	0.254191	-2.15371	0.0312632	0.562464	0.249905	d	0
chr5_1594646_1594646	chr5	1594646	1594646	-	sdhap3	nr_003263	464	15	209	28	86.6471	-0.564405	0.262176	-2.15277	0.0313368	0.562556	0.249834	d	0
chr20_62711324_62711324	chr20	62711324	62711324	-	rgs19	nm_001039467	389	17	197	25	80.6473	-0.564999	0.262593	-2.15162	0.0314274	0.562955	0.249526	d	0
chr10_134779037_134779037	chr10	134779037	134779037	+	linc01168	nr_046231	1092	78	716	118	299.313	-0.496745	0.231497	-2.1458	0.0318893	0.567303	0.246185	d	0
chr8_29779028_29779028	chr8	29779028	29779028	+	fam183cp	nr_024473	1063	95	687	152	330.654	-0.487049	0.227436	-2.14148	0.0322355	0.569979	0.244141	d	0
chr19_51529872_51529872	chr19	51529872	51529872	-	klk11	nm_001136032	711	31	377	55	153.005	-0.525351	0.246422	-2.13191	0.0330142	0.574167	0.240962	d	0
chr11_196760_196760	chr11	196760	196760	+	odf3	nm_053280	951	43	488	85	210.293	-0.509922	0.239444	-2.12961	0.0332041	0.574167	0.240962	d	0
chr21_47256333_47256333	chr21	47256333	47256333	-	al592528.1	nr_038876	607	39	330	67	155.754	-0.51975	0.244715	-2.1239	0.0336786	0.574167	0.240962	d	0
chr3_46923738_46923738	chr3	46923738	46923738	+	pth1r	nm_001184744	1214	48	657	93	255.958	-0.498306	0.234705	-2.12312	0.0337441	0.574167	0.240962	d	0
chr9_134151906_134151906	chr9	134151906	134151906	-	fam78a	nm_033387	610	29	332	48	135.326	-0.528687	0.249187	-2.12164	0.0338676	0.574167	0.240962	d	0
chr9_139652731_139652731	chr9	139652731	139652731	-	lcn8	nm_178469	538	17	287	26	100.951	-0.547146	0.258153	-2.11946	0.0340515	0.574167	0.240962	d	0
chr1_171106878_171106878	chr1	171106878	171106878	+	fmo6p	nr_002601	333	34	186	50	107.306	-0.538066	0.254134	-2.11725	0.0342385	0.574167	0.240962	d	0
chr17_71258019_71258019	chr17	71258019	71258019	-	cpsf4l	nm_001129885	330	15	154	24	69.2441	-0.562805	0.265827	-2.11718	0.0342445	0.574167	0.240962	d	0
chr21_44589117_44589117	chr21	44589117	44589117	+	cryaa	nm_000394	591	23	285	44	120.543	-0.536693	0.253609	-2.11622	0.0343261	0.574167	0.240962	d	0
chr4_8581963_8581963	chr4	8581963	8581963	+	gpr78	nr_045511	1706	87	980	167	405.004	-0.473883	0.224317	-2.11256	0.0346387	0.574167	0.240962	d	0
chr17_68071365_68071365	chr17	68071365	68071365	+	kcnj16	nm_018658	247	24	130	33	75.5563	-0.555413	0.26308	-2.11119	0.0347558	0.574167	0.240962	d	0
chr5_1178720_1178720	chr5	1178720	1178720	-	ctd-3080p12.3	nr_109911	1002	19	435	47	163.198	-0.534791	0.253446	-2.11008	0.0348515	0.574167	0.240962	d	0
chr7_752844_752844	chr7	752844	752844	-	prkar1b	nm_001164761	667	19	312	39	121.86	-0.5382	0.255143	-2.1094	0.0349097	0.574167	0.240962	d	0
chr4_145567171_145567171	chr4	145567171	145567171	-	hhip-as1	nr_037595	358	20	161	36	83.6646	-0.552345	0.261859	-2.10933	0.0349165	0.574167	0.240962	d	0
chr1_165551341_165551341	chr1	165551341	165551341	-	rp11-280o1.2	nr_026744	584	67	408	88	204.484	-0.508735	0.241958	-2.10257	0.035503	0.578031	0.238049	d	0
chr11_10482677_10482677	chr11	10482677	10482677	+	ampd3	nm_001172430	295	32	190	36	95.8054	-0.546576	0.260123	-2.10122	0.0356217	0.578817	0.237459	d	0
chr1_159172212_159172212	chr1	159172212	159172212	-	cadm3-as1	nr_037870	1050	53	560	104	245.39	-0.49365	0.235204	-2.09882	0.0358327	0.579954	0.236606	d	0
chr20_3218835_3218835	chr20	3218835	3218835	-	slc4a11	nm_001174090	1507	29	649	75	247.464	-0.517922	0.247245	-2.09477	0.0361912	0.580762	0.236002	d	0
chr5_1856682_1856682	chr5	1856682	1856682	-	loc101929034	nr_104602	936	49	536	87	221.518	-0.495006	0.236362	-2.09427	0.0362358	0.580762	0.236002	d	0
chr10_72142406_72142406	chr10	72142406	72142406	-	lrrc20	nm_001278212	511	35	273	60	134.984	-0.519766	0.248398	-2.09247	0.0363962	0.582198	0.234929	d	0
chr10_25241573_25241573	chr10	25241573	25241573	-	prtfdc1	nm_020200	247	21	133	27	69.4287	-0.554976	0.265333	-2.09162	0.0364723	0.582243	0.234895	d	0
chr11_103720633_103720633	chr11	103720633	103720633	+	mir4693	nr_039842	165	23	91	27	61.6086	-0.55989	0.267881	-2.09007	0.0366115	0.582243	0.234895	d	0
chr9_33795558_33795558	chr9	33795558	33795558	+	prss3	nm_002771	778	35	419	64	171.036	-0.508565	0.243547	-2.08816	0.0367833	0.583034	0.234306	d	0
chr19_46544274_46544274	chr19	46544274	46544274	-	igfl4	nm_001002923	1198	103	807	162	366.313	-0.472904	0.226501	-2.08787	0.0368094	0.583034	0.234306	d	0
chr1_206680878_206680878	chr1	206680878	206680878	+	rassf5	nm_182663	1113	57	632	106	262.544	-0.4849	0.232812	-2.08279	0.03727	0.583034	0.234306	d	0
chr7_129410332_129410332	chr7	129410332	129410332	-	mir182	nr_029614	916	31	457	64	180.572	-0.509682	0.244741	-2.08254	0.0372934	0.583034	0.234306	d	0
chr2_96012767_96012767	chr2	96012767	96012767	+	kcnip3	nm_001034914	1139	32	565	69	211.443	-0.505097	0.242602	-2.08199	0.037343	0.583034	0.234306	d	0
chr19_4229539_4229539	chr19	4229539	4229539	+	ebi3	nm_005755	599	27	332	44	130.18	-0.521114	0.250395	-2.08117	0.037418	0.583034	0.234306	d	0
chr19_51143092_51143092	chr19	51143092	51143092	-	syt3	nm_001160328	1245	71	732	130	309.901	-0.475844	0.228663	-2.08098	0.0374358	0.583034	0.234306	d	0
chr7_105517031_105517031	chr7	105517031	105517031	-	atxn7l1	nm_152749	216	23	134	23	67.655	-0.556799	0.267658	-2.08027	0.037501	0.583034	0.234306	d	0
chr11_70507945_70507945	chr11	70507945	70507945	-	shank2	nm_133266	756	25	332	57	146.27	-0.524668	0.252645	-2.0767	0.0378292	0.58668	0.231599	d	0
chr19_51921057_51921057	chr19	51921057	51921057	-	siglec10	nm_001171157	431	29	269	36	109.978	-0.532072	0.256386	-2.07528	0.0379608	0.58668	0.231599	d	0
chr11_70935842_70935842	chr11	70935842	70935842	-	shank2	nm_012309	274	15	125	24	62.2038	-0.554669	0.267676	-2.07217	0.03825	0.589729	0.229348	d	0
chr10_88126250_88126250	chr10	88126250	88126250	-	grid1	nm_017551	1772	74	958	154	386.605	-0.470083	0.227513	-2.06618	0.0388111	0.595345	0.225231	d	0
chr1_31230683_31230683	chr1	31230683	31230683	-	laptm5	nm_006762	259	17	123	26	64.1746	-0.550569	0.266808	-2.06354	0.0390616	0.597914	0.223361	d	0
chr1_21044510_21044510	chr1	21044510	21044510	-	kif17	nm_001122819	506	32	286	51	127.967	-0.514871	0.249984	-2.05962	0.039435	0.598833	0.222694	d	0
chr5_134369964_134369964	chr5	134369964	134369964	-	pitx1	nm_002653	315	16	130	31	70.3371	-0.548168	0.266207	-2.05918	0.039477	0.598833	0.222694	d	0
chr7_752577_752577	chr7	752577	752577	-	prkar1b	nm_001164762	675	19	312	41	123.41	-0.525243	0.255451	-2.05614	0.0397689	0.598833	0.222694	d	0
chr17_41836156_41836156	chr17	41836156	41836156	-	sost	nm_025237	1113	48	568	101	243.685	-0.487585	0.237335	-2.05441	0.0399358	0.598833	0.222694	d	0
chr19_10541520_10541520	chr19	10541520	10541520	+	pde4a	nm_001111308	414	23	219	37	97.3576	-0.526544	0.257396	-2.04566	0.0407901	0.608668	0.215619	d	0
chr8_25902640_25902640	chr8	25902640	25902640	-	ebf2	nm_022659	1026	38	514	81	210.67	-0.493265	0.241395	-2.0434	0.0410132	0.609784	0.214824	d	0
chr11_76777991_76777991	chr11	76777991	76777991	+	capn5	nm_004055	207	15	101	20	52.9019	-0.55162	0.270141	-2.04197	0.0411544	0.61078	0.214116	d	0
chr1_27320194_27320194	chr1	27320194	27320194	+	trnp1	nm_001013642	577	24	262	51	121.804	-0.519603	0.254666	-2.04033	0.041317	0.612088	0.213186	d	0
chr7_119913721_119913721	chr7	119913721	119913721	+	kcnd2	nm_012281	336	21	180	31	82.508	-0.532052	0.2614	-2.0354	0.041811	0.615137	0.211028	d	0
chr1_94703307_94703307	chr1	94703307	94703307	-	arhgap29	nm_004815	178	17	86	23	53.0643	-0.549215	0.269945	-2.03454	0.041897	0.615137	0.211028	d	0
chr4_145567147_145567147	chr4	145567147	145567147	+	hhip	nm_022475	358	19	160	36	82.3533	-0.534012	0.262585	-2.03368	0.0419842	0.61532	0.210899	d	0
chr1_159173802_159173802	chr1	159173802	159173802	+	darc	nm_002036	1119	59	604	119	268.921	-0.474292	0.233337	-2.03265	0.042088	0.615334	0.210889	d	0
chr10_70320116_70320116	chr10	70320116	70320116	+	tet1	nm_030625	402	16	162	35	81.9481	-0.537569	0.264541	-2.03208	0.0421452	0.615334	0.210889	d	0
chr1_47881743_47881743	chr1	47881743	47881743	+	foxe3	nm_012186	1097	39	566	82	222.601	-0.486268	0.239675	-2.02887	0.042472	0.616969	0.209736	d	0
chr19_7733971_7733971	chr19	7733971	7733971	+	retn	nm_020415	943	42	578	69	209.023	-0.483571	0.238643	-2.02634	0.04273	0.617128	0.209625	d	0
chr12_132905905_132905905	chr12	132905905	132905905	-	galnt9	nm_001122636	1115	78	676	141	308.094	-0.462046	0.228161	-2.02509	0.0428582	0.617128	0.209625	d	0
chr1_47082563_47082563	chr1	47082563	47082563	-	mob3c	nm_201403	222	20	117	27	64.7954	-0.539439	0.266506	-2.02412	0.0429581	0.617225	0.209557	d	0
chr11_120008863_120008863	chr11	120008863	120008863	-	trim29	nm_012101	1074	73	720	113	289.827	-0.469742	0.23222	-2.02284	0.0430901	0.617225	0.209557	d	0
chr1_27961727_27961727	chr1	27961727	27961727	-	fgr	nm_005248	446	16	193	34	87.7428	-0.529497	0.26262	-2.01621	0.0437779	0.621754	0.206382	d	0
chr11_61687741_61687741	chr11	61687741	61687741	-	rab3il1	nm_001271686	392	15	158	33	78.6639	-0.534197	0.265393	-2.01285	0.04413	0.621754	0.206382	d	0
chr19_45417920_45417920	chr19	45417920	45417920	+	apoc1	nm_001645	407	16	236	20	82.0088	-0.529911	0.263439	-2.01151	0.0442716	0.621754	0.206382	d	0
chr2_29204163_29204163	chr2	29204163	29204163	+	fam179a	nm_199280	562	39	350	58	149.796	-0.495883	0.246665	-2.01035	0.0443941	0.621754	0.206382	d	0
chr6_160327973_160327973	chr6	160327973	160327973	+	mas1	nm_002377	530	46	360	61	158.017	-0.495973	0.247224	-2.00617	0.044838	0.624845	0.204228	d	0
chr16_2794798_2794798	chr16	2794798	2794798	-	srrm2-as1	nr_027274	383	17	199	27	81.2436	-0.525379	0.262312	-2.00288	0.0451899	0.62603	0.203405	d	0
chr9_126118445_126118445	chr9	126118445	126118445	+	crb2	nm_173689	925	40	484	82	202.818	-0.481093	0.240586	-1.99967	0.0455362	0.628689	0.201564	d	0
chr12_114846247_114846247	chr12	114846247	114846247	-	tbx5	nm_000192	884	56	538	97	230.598	-0.469591	0.234874	-1.99933	0.0455727	0.628689	0.201564	d	0
chr7_120969089_120969089	chr7	120969089	120969089	+	wnt16	nm_057168	993	75	686	113	282.784	-0.464051	0.232846	-1.99295	0.0462668	0.632967	0.198619	d	0
chr7_151574126_151574126	chr7	151574126	151574126	+	prkag2-as1	nr_038926	1414	52	759	110	293.559	-0.464995	0.233329	-1.99287	0.0462759	0.632967	0.198619	d	0
chr7_94285681_94285681	chr7	94285681	94285681	+	peg10	nm_001172438	377	29	235	38	103.568	-0.511507	0.256989	-1.99039	0.0465482	0.634692	0.197437	d	0
chr2_238475216_238475216	chr2	238475216	238475216	+	prlh	nm_015893	641	38	376	64	159.921	-0.485473	0.244184	-1.98814	0.0467959	0.635357	0.196982	d	0
chr9_98225890_98225890	chr9	98225890	98225890	+	loc100507346	nr_038982	172	18	105	17	52.7443	-0.539212	0.271339	-1.98723	0.0468973	0.635357	0.196982	d	0
chr20_58152563_58152563	chr20	58152563	58152563	+	phactr3	nm_001199505	1645	64	860	141	349.702	-0.459499	0.231257	-1.98696	0.0469264	0.635357	0.196982	d	0
chr20_62711470_62711470	chr20	62711470	62711470	+	oprl1	nm_182647	409	17	213	28	85.0117	-0.517569	0.261394	-1.98003	0.0476997	0.639782	0.193968	d	0
chr7_94285636_94285636	chr7	94285636	94285636	+	peg10	nm_001184962	378	29	237	38	103.823	-0.508129	0.256989	-1.97724	0.0480142	0.641907	0.192528	d	0
chr12_114843968_114843968	chr12	114843968	114843968	-	tbx5	nm_181486	957	48	552	90	224.738	-0.466034	0.236349	-1.97181	0.0486317	0.648055	0.188388	d	0
chr17_26553588_26553588	chr17	26553588	26553588	+	pyy2	nr_003064	1044	47	614	87	234.57	-0.463148	0.235541	-1.96632	0.0492616	0.652221	0.185605	d	0
chr3_46505161_46505161	chr3	46505161	46505161	-	ltf	nm_001199149	1699	112	1042	215	462.181	-0.434415	0.221041	-1.96531	0.049378	0.652711	0.185279	d	0
chr15_36887069_36887069	chr15	36887069	36887069	+	c15orf41	nm_032499	199	20	117	23	61.1308	-0.527087	0.268328	-1.96434	0.0494912	0.652804	0.185217	d	0
chr2_217498126_217498126	chr2	217498126	217498126	+	igfbp2	nm_000597	741	33	331	77	163.823	-0.490271	0.249731	-1.9632	0.0496232	0.652804	0.185217	d	0
chr7_752161_752161	chr7	752161	752161	-	prkar1b	nm_002735	667	17	315	38	119.22	-0.502997	0.256635	-1.95997	0.0499993	0.65653	0.182745	d	0
chr4_37892704_37892704	chr4	37892704	37892704	+	tbc1d1	nm_015173	532	30	259	61	129.788	-0.493013	0.251615	-1.9594	0.0500662	0.65653	0.182745	d	0
chr14_101292468_101292468	chr14	101292468	101292468	+	meg3	nr_003531	375	16	178	30	78.9028	-0.514138	0.26337	-1.95215	0.05092	0.664988	0.177186	d	0
chr2_71062953_71062953	chr2	71062953	71062953	-	cd207	nm_015717	949	74	583	134	278.546	-0.449051	0.230062	-1.95187	0.0509538	0.664988	0.177186	d	0
chr11_10715535_10715535	chr11	10715535	10715535	-	mrvi1	nm_001206880	211	17	108	24	58.0937	-0.522869	0.268522	-1.94721	0.0515099	0.669058	0.174536	d	0
chr10_118032796_118032796	chr10	118032796	118032796	-	gfra1	nm_001145453	379	21	231	27	88.6069	-0.507301	0.261159	-1.9425	0.0520766	0.669243	0.174416	d	0
chr20_55788751_55788751	chr20	55788751	55788751	+	loc102723590	nr_110631	455	20	190	46	98.5365	-0.505612	0.260898	-1.93797	0.0526268	0.669243	0.174416	d	0
chr16_2908171_2908171	chr16	2908171	2908171	-	prss22	nm_022119	893	24	464	51	164.873	-0.479561	0.247564	-1.93712	0.0527303	0.669243	0.174416	d	0
chr8_10383055_10383055	chr8	10383055	10383055	+	prss55	nm_001197020	326	32	245	30	100.38	-0.510351	0.263476	-1.937	0.0527459	0.669243	0.174416	d	0
chr17_72581056_72581056	chr17	72581056	72581056	+	c17orf77	nm_152460	485	34	304	50	129.839	-0.485119	0.250455	-1.93695	0.0527516	0.669243	0.174416	d	0
chr3_39851150_39851150	chr3	39851150	39851150	+	myrip	nm_001284425	1547	102	1020	180	419.926	-0.431342	0.22295	-1.9347	0.053027	0.669243	0.174416	d	0
chr17_11144739_11144739	chr17	11144739	11144739	+	shisa6	nm_207386	1165	58	744	100	275.003	-0.448498	0.231874	-1.93423	0.0530848	0.669243	0.174416	d	0
chr11_120110902_120110902	chr11	120110902	120110902	+	pou2f3	nm_014352	1770	84	999	177	412.673	-0.436219	0.225545	-1.93407	0.0531045	0.669243	0.174416	d	0
chr1_3477354_3477354	chr1	3477354	3477354	-	mir551a	nr_030277	624	21	303	45	122.775	-0.491894	0.254433	-1.93329	0.0532	0.669243	0.174416	d	0
chr17_48639469_48639469	chr17	48639469	48639469	-	cacna1g-as1	nr_038439	1191	32	605	73	220.931	-0.467952	0.24233	-1.93105	0.0534772	0.670703	0.17347	d	0
chr19_14142551_14142551	chr19	14142551	14142551	+	il27ra	nm_004843	484	20	241	39	102.149	-0.496947	0.257386	-1.93075	0.0535145	0.670703	0.17347	d	0
chr4_8073743_8073743	chr4	8073743	8073743	-	ablim2	nm_001286688	2014	105	1219	209	491.705	-0.426015	0.221007	-1.92761	0.0539042	0.672011	0.172623	d	0
chr10_105807944_105807944	chr10	105807944	105807944	-	mir936	nr_030760	243	20	125	31	68.9959	-0.510628	0.265047	-1.92656	0.0540348	0.672011	0.172623	d	0
chr13_114321596_114321596	chr13	114321596	114321596	+	grk1	nm_002929	963	36	473	82	200.025	-0.469451	0.24386	-1.92509	0.0542185	0.672011	0.172623	d	0
chr19_46733008_46733008	chr19	46733008	46733008	+	igfl1	nm_198541	1631	96	963	193	420.268	-0.430965	0.223878	-1.925	0.0542295	0.672011	0.172623	d	0
chr11_32851480_32851480	chr11	32851480	32851480	+	prrg4	nm_024081	358	23	189	39	91.1357	-0.498108	0.258802	-1.92467	0.0542709	0.672011	0.172623	d	0
chr1_12704565_12704565	chr1	12704565	12704565	+	aadacl4	nm_001013630	494	40	315	60	143.396	-0.476143	0.247609	-1.92296	0.0544848	0.673044	0.171956	d	0
chr5_535997_535997	chr5	535997	535997	-	mir4456	nr_039661	1264	39	637	90	245.869	-0.461537	0.240071	-1.9225	0.0545427	0.673044	0.171956	d	0
chr10_72136535_72136535	chr10	72136535	72136535	-	lrrc20	nm_001278213	272	18	134	30	69.2161	-0.509856	0.265267	-1.92205	0.0545999	0.673044	0.171956	d	0
chr16_2867163_2867163	chr16	2867163	2867163	+	prss21	nm_006799	1219	24	539	65	204.02	-0.481001	0.250676	-1.91882	0.0550076	0.674327	0.17113	d	0
chr1_151826173_151826173	chr1	151826173	151826173	-	them5	nm_182578	666	43	398	75	174.954	-0.463555	0.241595	-1.91873	0.055019	0.674327	0.17113	d	0
chr14_101292444_101292444	chr14	101292444	101292444	+	meg3	nr_046464	373	16	180	30	78.9159	-0.505057	0.263328	-1.91798	0.055114	0.674327	0.17113	d	0
chr16_66952887_66952887	chr16	66952887	66952887	-	cdh16	nm_001204746	1364	62	721	137	310.684	-0.445071	0.232754	-1.9122	0.055851	0.676431	0.169776	d	0
chr19_7745706_7745706	chr19	7745706	7745706	+	trappc5	nm_174894	516	29	248	61	126.316	-0.482557	0.252524	-1.91093	0.0560129	0.676431	0.169776	d	0
chr11_130318868_130318868	chr11	130318868	130318868	+	adamts15	nm_139055	832	43	509	75	198.005	-0.45661	0.239149	-1.90931	0.056222	0.676431	0.169776	d	0
chr3_52813936_52813936	chr3	52813936	52813936	+	itih1	nm_001166435	1402	97	883	182	391.086	-0.426525	0.223572	-1.90778	0.0564199	0.676431	0.169776	d	0
chr21_39870428_39870428	chr21	39870428	39870428	-	erg	nm_182918	200	25	130	28	70.7292	-0.507932	0.266382	-1.90678	0.0565496	0.676431	0.169776	d	0
chr12_114845999_114845999	chr12	114845999	114845999	+	tbx5-as1	nr_038440	899	52	534	97	226.562	-0.449174	0.235576	-1.9067	0.0565593	0.676431	0.169776	d	0
chr13_28366779_28366779	chr13	28366779	28366779	+	gsx1	nm_145657	2488	107	1530	214	561.72	-0.417925	0.219199	-1.9066	0.0565724	0.676431	0.169776	d	0
chr4_74735108_74735108	chr4	74735108	74735108	+	cxcl1	nm_001511	434	39	286	55	132.545	-0.476888	0.250177	-1.9062	0.0566242	0.676431	0.169776	d	0
chr3_52813941_52813941	chr3	52813941	52813941	+	itih1	nm_001166436	1404	97	885	182	391.421	-0.426042	0.223558	-1.90573	0.0566847	0.676431	0.169776	d	0
chr1_31984035_31984035	chr1	31984035	31984035	+	linc01226	nr_027085	809	64	565	96	236.248	-0.450894	0.236714	-1.9048	0.0568056	0.676892	0.169481	d	0
chr3_193712027_193712027	chr3	193712027	193712027	-	dppa2p3	nr_027764	1005	92	708	146	321.421	-0.435954	0.22943	-1.90016	0.0574117	0.679289	0.167946	d	0
chr2_128175995_128175995	chr2	128175995	128175995	+	proc	nm_000312	598	27	307	55	132.901	-0.474959	0.250742	-1.89421	0.0581967	0.679289	0.167946	d	0
chr22_18260055_18260055	chr22	18260055	18260055	+	linc00528	nr_103718	456	19	251	32	96.3705	-0.489165	0.258335	-1.89353	0.058287	0.679289	0.167946	d	0
chr17_72363644_72363644	chr17	72363644	72363644	+	gpr142	nm_181790	837	32	444	67	175.655	-0.462448	0.244396	-1.89221	0.0584628	0.679289	0.167946	d	0
chr19_42498428_42498428	chr19	42498428	42498428	-	atp1a3	nm_001256214	1492	53	736	127	306.761	-0.448537	0.237052	-1.89215	0.0584713	0.679289	0.167946	d	0
chr10_125425870_125425870	chr10	125425870	125425870	+	gpr26	nm_153442	1224	50	644	111	266.229	-0.44654	0.23612	-1.89115	0.058604	0.679289	0.167946	d	0
chr17_72542310_72542310	chr17	72542310	72542310	-	cd300c	nm_006678	312	15	150	27	68.8032	-0.502822	0.265971	-1.89052	0.0586889	0.679289	0.167946	d	0
chr15_88795960_88795960	chr15	88795960	88795960	+	ntrk3-as1	nr_038229	1030	48	597	94	236.354	-0.445425	0.235634	-1.89033	0.0587143	0.679289	0.167946	d	0
chr4_66536213_66536213	chr4	66536213	66536213	-	epha5	nm_001281766	818	47	472	90	205.341	-0.44999	0.238242	-1.88879	0.0589199	0.680392	0.167241	d	0
chr19_19322781_19322781	chr19	19322781	19322781	+	ncan	nm_004386	1427	58	762	129	310.815	-0.439665	0.232961	-1.88729	0.0591213	0.681142	0.166763	d	0
chr17_2699731_2699731	chr17	2699731	2699731	+	rap1gap2	nm_015085	1203	46	622	104	254.554	-0.44869	0.237856	-1.88639	0.0592421	0.681142	0.166763	d	0
chr21_40145401_40145401	chr21	40145401	40145401	-	linc00114	nr_027065	295	16	144	28	68.5872	-0.500899	0.265782	-1.88462	0.0594812	0.681142	0.166763	d	0
chr14_65007086_65007086	chr14	65007086	65007086	-	loc102723809	nr_110550	459	16	231	31	90.7439	-0.490807	0.260558	-1.88368	0.0596083	0.681142	0.166763	d	0
chr19_42569957_42569957	chr19	42569957	42569957	-	grik5	nm_002088	1470	74	855	152	352.386	-0.428295	0.227406	-1.88339	0.0596475	0.681142	0.166763	d	0
chr7_151574316_151574316	chr7	151574316	151574316	-	prkag2	nm_016203	1457	54	784	120	306.179	-0.438769	0.233314	-1.88059	0.0600271	0.684525	0.164611	d	0
chr1_152386750_152386750	chr1	152386750	152386750	-	crnn	nm_016190	252	34	192	34	94.0574	-0.494699	0.263823	-1.87512	0.060776	0.687345	0.162825	d	0
chr20_30433420_30433420	chr20	30433420	30433420	-	foxs1	nm_004118	591	30	334	55	138.363	-0.464307	0.248471	-1.86866	0.0616705	0.694595	0.158268	d	0
chrX_144902865_144902865	chrX	144902865	144902865	+	slitrk2	nm_001144006	752	53	474	92	208.447	-0.441918	0.237162	-1.86336	0.0624115	0.697793	0.156273	d	0
chr1_204121307_204121307	chr1	204121307	204121307	-	etnk2	nm_018208	1092	47	554	108	242.717	-0.444883	0.239142	-1.86033	0.0628389	0.698139	0.156058	d	0
chr22_25202135_25202135	chr22	25202135	25202135	+	sgsm1	nm_133454	1107	61	714	108	275.009	-0.4301	0.231435	-1.8584	0.0631115	0.698139	0.156058	d	0
chr12_113344738_113344738	chr12	113344738	113344738	+	oas1	nm_002534	249	19	143	26	67.5602	-0.494023	0.265957	-1.85753	0.0632361	0.698139	0.156058	d	0
chr11_113144623_113144623	chr11	113144623	113144623	-	ncam1-as1	nr_034101	731	38	412	74	174.839	-0.450847	0.242734	-1.85737	0.0632587	0.698139	0.156058	d	0
chr11_75917574_75917574	chr11	75917574	75917574	-	wnt11	nm_004626	1316	44	718	97	266.409	-0.436483	0.235969	-1.84975	0.0643497	0.705444	0.151537	d	0
chr2_205410515_205410515	chr2	205410515	205410515	+	pard3b	nm_057177	149	16	86	18	47.2392	-0.501894	0.271863	-1.84613	0.0648736	0.708912	0.149408	d	0
chr3_39850404_39850404	chr3	39850404	39850404	+	myrip	nm_001284423	1415	89	944	159	377.242	-0.414627	0.224947	-1.84322	0.0652967	0.712028	0.147503	d	0
chr3_186648314_186648314	chr3	186648314	186648314	+	st6gal1	nm_173216	332	21	195	31	83.4929	-0.480221	0.261326	-1.83763	0.0661162	0.717699	0.144058	d	0
chr2_42104694_42104694	chr2	42104694	42104694	+	ac104654.1	nr_033996	695	47	419	86	188.998	-0.439791	0.239512	-1.83619	0.0663291	0.717699	0.144058	d	0
chr14_78636715_78636715	chr14	78636715	78636715	+	nrxn3	nr_073547	468	41	311	61	142.629	-0.455139	0.247957	-1.83555	0.0664236	0.717699	0.144058	d	0
chr20_42574535_42574535	chr20	42574535	42574535	+	tox2	nm_001098798	337	29	208	43	100.255	-0.470129	0.256537	-1.83259	0.0668629	0.717699	0.144058	d	0
chr3_75721541_75721541	chr3	75721541	75721541	+	linc00960	nr_040004	819	36	518	61	182.834	-0.443436	0.241983	-1.83251	0.0668754	0.717699	0.144058	d	0
chr1_110306644_110306644	chr1	110306644	110306644	-	eps8l3	nm_139053	495	25	252	51	115.548	-0.465504	0.254241	-1.83096	0.0671071	0.717699	0.144058	d	0
chr1_93913687_93913687	chr1	93913687	93913687	+	fnbp1l	nm_001164473	196	19	105	28	60.8828	-0.489742	0.267535	-1.83057	0.0671645	0.717699	0.144058	d	0
chr11_1718424_1718424	chr11	1718424	1718424	+	krtap5-6	nm_001012416	842	36	462	75	186.146	-0.443429	0.242268	-1.83033	0.0672013	0.717699	0.144058	d	0
chr5_180631340_180631340	chr5	180631340	180631340	-	trim7	nm_203294	509	22	260	45	110.984	-0.467095	0.255356	-1.8292	0.0673704	0.717699	0.144058	d	0
chr3_72149606_72149606	chr3	72149606	72149606	-	linc00877	nr_104116	621	41	357	78	166.664	-0.443284	0.243069	-1.8237	0.0681979	0.718293	0.143699	d	0
chr17_80291921_80291921	chr17	80291921	80291921	-	sectm1	nm_003004	715	17	380	36	127.848	-0.462848	0.253862	-1.82322	0.0682697	0.718293	0.143699	d	0
chr12_49932939_49932939	chr12	49932939	49932939	+	kcnh3	nm_012284	1594	53	887	118	324.066	-0.422493	0.232024	-1.8209	0.0686215	0.71965	0.142879	d	0
chr9_136084637_136084637	chr9	136084637	136084637	-	obp2b	nm_014581	900	43	510	88	209.458	-0.433579	0.238785	-1.81577	0.0694051	0.722341	0.141258	d	0
chr18_60190657_60190657	chr18	60190657	60190657	+	zcchc2	nm_017742	297	36	203	48	107.429	-0.464697	0.256144	-1.8142	0.0696466	0.723937	0.140299	d	0
chr11_72353504_72353504	chr11	72353504	72353504	-	pde2a	nm_001243784	1111	71	675	140	298.663	-0.415788	0.229425	-1.81231	0.0699386	0.725395	0.139426	d	0
chr2_239148765_239148765	chr2	239148765	239148765	-	hes6	nm_018645	763	27	428	54	156.29	-0.447138	0.246745	-1.81215	0.0699633	0.725395	0.139426	d	0
chr19_35773409_35773409	chr19	35773409	35773409	+	hamp	nm_021175	839	36	475	73	186.131	-0.437254	0.241793	-1.80838	0.0705474	0.725418	0.139411	d	0
chr3_26664299_26664299	chr3	26664299	26664299	+	lrrc3b	nm_052953	1063	44	582	96	233.715	-0.429839	0.237781	-1.80771	0.0706517	0.725418	0.139411	d	0
chr12_54362540_54362540	chr12	54362540	54362540	-	hotair	nr_003716	683	33	352	72	158.715	-0.446305	0.24692	-1.80749	0.0706859	0.725418	0.139411	d	0
chr17_8815834_8815834	chr17	8815834	8815834	-	pik3r5	nm_014308	1031	55	621	108	253.434	-0.420774	0.233439	-1.8025	0.0714666	0.728953	0.137301	d	0
chr17_59533806_59533806	chr17	59533806	59533806	+	tbx4	nm_018488	801	32	429	69	172.352	-0.441128	0.244898	-1.80127	0.0716598	0.728953	0.137301	d	0
chr15_65369153_65369153	chr15	65369153	65369153	+	kbtbd13	nm_001101362	702	41	426	75	177.847	-0.434422	0.241419	-1.79945	0.0719474	0.728953	0.137301	d	0
chr5_176811431_176811431	chr5	176811431	176811431	+	slc34a1	nm_003052	1384	68	832	139	330.22	-0.409986	0.228398	-1.79505	0.0726461	0.728953	0.137301	d	0
chr11_70477198_70477198	chr11	70477198	70477198	+	shank2-as1	nr_046567	727	23	309	62	141.744	-0.460024	0.256503	-1.79344	0.0729021	0.728953	0.137301	d	0
chr1_228645560_228645560	chr1	228645560	228645560	-	hist3h2a	nm_033445	379	25	222	41	99.0579	-0.460208	0.256647	-1.79316	0.0729478	0.728953	0.137301	d	0
chr5_63258119_63258119	chr5	63258119	63258119	-	htr1a	nm_000524	1434	60	783	136	318.827	-0.416411	0.232326	-1.79236	0.073076	0.728953	0.137301	d	0
chr6_96463844_96463844	chr6	96463844	96463844	+	fut9	nm_006581	472	32	279	56	126.881	-0.447972	0.249948	-1.79226	0.0730915	0.728953	0.137301	d	0
chr1_20141771_20141771	chr1	20141771	20141771	-	rnf186	nm_019062	339	22	193	36	87.3706	-0.465655	0.259821	-1.79222	0.0730984	0.728953	0.137301	d	0
chr6_43858764_43858764	chr6	43858764	43858764	+	loc100132354	nr_024478	291	16	160	25	68.301	-0.476276	0.26575	-1.79219	0.0731018	0.728953	0.137301	d	0
chr12_54362698_54362698	chr12	54362698	54362698	-	hotair	nr_047518	685	34	366	72	161.32	-0.440385	0.245762	-1.79191	0.0731467	0.728953	0.137301	d	0
chr3_12393000_12393000	chr3	12393000	12393000	+	pparg	nm_015869	192	22	109	32	66.3927	-0.476281	0.265833	-1.79165	0.0731887	0.728953	0.137301	d	0
chr2_233390869_233390869	chr2	233390869	233390869	+	chrnd	nm_000751	1312	35	723	79	247.355	-0.426897	0.238546	-1.78958	0.0735213	0.728953	0.137301	d	0
chr1_48462562_48462562	chr1	48462562	48462562	-	trabd2b	nm_001194986	585	50	406	76	178.146	-0.434222	0.242694	-1.78917	0.0735868	0.728953	0.137301	d	0
chr5_112770728_112770728	chr5	112770728	112770728	-	tssk1b	nm_032028	268	17	152	25	66.9745	-0.475713	0.266105	-1.78769	0.0738264	0.729409	0.137029	d	0
chr8_128412643_128412643	chr8	128412643	128412643	+	ccat2	nr_109834	261	36	189	44	101.497	-0.463124	0.259128	-1.78724	0.073899	0.729409	0.137029	d	0
chr10_64133915_64133915	chr10	64133915	64133915	+	znf365	nm_199451	301	30	193	43	97.2712	-0.46002	0.257485	-1.78659	0.0740038	0.729567	0.136935	d	0
chr7_960526_960526	chr7	960526	960526	-	adap1	nm_001284311	651	17	359	34	119.954	-0.454244	0.25459	-1.78422	0.074388	0.731226	0.135948	d	0
chr19_35981433_35981433	chr19	35981433	35981433	-	krtdap	nm_001244847	1527	97	970	191	412.816	-0.397511	0.222945	-1.783	0.0745865	0.731226	0.135948	d	0
chr11_10673848_10673848	chr11	10673848	10673848	-	mrvi1	nm_001098579	178	17	97	24	54.4756	-0.480439	0.269553	-1.78235	0.0746914	0.731226	0.135948	d	0
chr5_180627930_180627930	chr5	180627930	180627930	-	trim7	nm_203297	638	52	414	89	191.448	-0.426337	0.239211	-1.78227	0.0747057	0.731226	0.135948	d	0
chr10_103540126_103540126	chr10	103540126	103540126	-	fgf8	nm_001206389	438	19	226	38	95.4576	-0.460059	0.258892	-1.77703	0.0755633	0.736116	0.133054	d	0
chr3_133648656_133648656	chr3	133648656	133648656	-	c3orf36	nm_025041	759	44	438	88	193.045	-0.426163	0.240057	-1.77526	0.0758557	0.737731	0.132102	d	0
chr13_32605436_32605436	chr13	32605436	32605436	+	fry	nm_023037	142	18	91	19	50.012	-0.481441	0.271678	-1.7721	0.0763775	0.738779	0.131486	d	0
chr22_37215517_37215517	chr22	37215517	37215517	-	pvalb	nm_002854	2006	136	1310	268	563.654	-0.385464	0.217769	-1.77006	0.0767172	0.740339	0.130569	d	0
chr17_72244504_72244504	chr17	72244504	72244504	+	ttyh2	nm_052869	589	20	284	47	117.98	-0.453187	0.256252	-1.76852	0.0769742	0.740558	0.130441	d	0
chr6_16238810_16238810	chr6	16238810	16238810	+	gmpr	nm_006877	164	15	87	21	48.6693	-0.478999	0.271151	-1.76654	0.0773048	0.740558	0.130441	d	0
chr8_145559943_145559943	chr8	145559943	145559943	-	scrt1	nm_031309	1819	57	1061	125	365.428	-0.404542	0.229014	-1.76645	0.0773206	0.740558	0.130441	d	0
chr5_115298150_115298150	chr5	115298150	115298150	+	aqpep	nm_173800	599	34	355	63	149.356	-0.434128	0.246067	-1.76427	0.0776869	0.741704	0.129769	d	0
chr19_46367517_46367517	chr19	46367517	46367517	+	foxa3	nm_004497	1131	55	683	111	268.254	-0.408788	0.23267	-1.75694	0.0789274	0.746629	0.126895	d	0
chr19_35992813_35992813	chr19	35992813	35992813	-	dmkn	nm_001035516	615	29	326	62	141.545	-0.436742	0.24921	-1.75251	0.0796863	0.747923	0.126143	d	0
chr17_41005259_41005259	chr17	41005259	41005259	+	aoc3	nm_001277732	425	32	286	46	119.176	-0.443576	0.25342	-1.75036	0.0800567	0.748778	0.125647	d	0
chr20_31595383_31595383	chr20	31595383	31595383	+	bpifb2	nm_025227	1291	70	738	153	323.32	-0.402267	0.229954	-1.74933	0.0802333	0.748778	0.125647	d	0
chr3_14583588_14583588	chr3	14583588	14583588	-	grip2	nm_001080423	1275	60	679	140	298.761	-0.409749	0.234372	-1.74828	0.0804148	0.748778	0.125647	d	0
chr5_150040402_150040402	chr5	150040402	150040402	+	myoz3	nm_133371	568	40	356	70	157.46	-0.426732	0.244222	-1.74731	0.0805831	0.749449	0.125258	d	0
chr3_8811300_8811300	chr3	8811300	8811300	-	oxtr	nm_000916	565	16	262	40	106.063	-0.453922	0.260018	-1.74573	0.0808577	0.750352	0.124735	d	0
chr18_7117813_7117813	chr18	7117813	7117813	-	lama1	nm_005559	624	34	366	65	153.235	-0.428537	0.245622	-1.7447	0.0810375	0.750871	0.124435	d	0
chr14_65007185_65007185	chr14	65007185	65007185	+	hspa2	nm_021979	461	17	234	36	94.6544	-0.453079	0.259746	-1.74431	0.0811047	0.750871	0.124435	d	0
chr17_26574469_26574469	chr17	26574469	26574469	+	ppy2	nr_002181	1066	39	558	92	223.933	-0.420347	0.241077	-1.74362	0.0812256	0.750871	0.124435	d	0
chr19_51530885_51530885	chr19	51530885	51530885	-	klk11	nm_144947	642	26	367	51	138.641	-0.434251	0.249237	-1.74232	0.0814531	0.750871	0.124435	d	0
chr8_143484543_143484543	chr8	143484543	143484543	-	tsnare1	nm_145003	486	22	279	40	108.523	-0.444282	0.255079	-1.74175	0.0815529	0.750871	0.124435	d	0
chr6_36807220_36807220	chr6	36807220	36807220	-	cpne5	nm_020939	866	45	505	92	210.542	-0.414889	0.238396	-1.74034	0.0817999	0.751922	0.123827	d	0
chr5_115783193_115783193	chr5	115783193	115783193	+	ctb-118n6.3	nr_109879	150	19	95	22	53.5878	-0.470601	0.270533	-1.73953	0.0819414	0.751922	0.123827	d	0
chr13_32605776_32605776	chr13	32605776	32605776	-	fry-as1	nr_103839	141	17	88	19	48.4458	-0.47153	0.27177	-1.73503	0.0827353	0.755833	0.121574	d	0
chr10_124214178_124214178	chr10	124214178	124214178	+	arms2	nm_001099667	156	20	94	26	57.0194	-0.466647	0.269091	-1.73416	0.0828896	0.756103	0.121419	d	0
chr20_47444420_47444420	chr20	47444420	47444420	-	prex1	nm_020820	633	25	295	62	135.397	-0.440461	0.254122	-1.73326	0.083049	0.756103	0.121419	d	0
chrX_13956831_13956831	chrX	13956831	13956831	-	gpm6b	nm_001001994	470	29	255	58	121.861	-0.436241	0.251962	-1.73138	0.0833847	0.756324	0.121292	d	0
chr7_113726364_113726364	chr7	113726364	113726364	+	foxp2	nr_033766	1312	71	759	155	328.972	-0.396387	0.229436	-1.72765	0.0840501	0.758573	0.120003	d	0
chr8_17433941_17433941	chr8	17433941	17433941	+	pdgfrl	nm_006207	1176	97	854	163	361.743	-0.391753	0.226958	-1.7261	0.0843286	0.760099	0.11913	d	0
chr19_51531290_51531290	chr19	51531290	51531290	-	klk11	nm_001167605	588	23	334	45	125.024	-0.434519	0.251995	-1.72432	0.0846505	0.760545	0.118875	d	0
chr3_6902801_6902801	chr3	6902801	6902801	+	grm7	nm_000844	948	37	448	95	203.747	-0.425075	0.246561	-1.72401	0.0847052	0.760545	0.118875	d	0
chr19_10400654_10400654	chr19	10400654	10400654	+	icam5	nm_003259	2088	53	1121	131	390.155	-0.401124	0.232765	-1.7233	0.0848336	0.760545	0.118875	d	0
chr16_51051668_51051668	chr16	51051668	51051668	+	rp11-883g14.2	nr_110913	209	17	115	26	59.4481	-0.461554	0.26805	-1.7219	0.0850878	0.760545	0.118875	d	0
chr2_98350868_98350868	chr2	98350868	98350868	+	zap70	nm_207519	380	15	172	35	79.8224	-0.455516	0.264554	-1.72183	0.0851011	0.760545	0.118875	d	0
chr3_75721431_75721431	chr3	75721431	75721431	+	linc00960	nr_040005	835	34	521	63	182.842	-0.416231	0.241894	-1.72071	0.0853027	0.760558	0.118868	d	0
chr1_204329057_204329057	chr1	204329057	204329057	-	plekha6	nm_014935	651	22	348	48	131.455	-0.433703	0.25205	-1.7207	0.0853051	0.760558	0.118868	d	0
chrX_38080177_38080177	chrX	38080177	38080177	-	srpx	nm_001170752	156	18	101	20	52.4645	-0.466106	0.271004	-1.71993	0.0854459	0.760558	0.118868	d	0
chr13_114454062_114454062	chr13	114454062	114454062	-	linc00552	nr_028064	580	24	325	48	126.177	-0.432653	0.251724	-1.71876	0.0856586	0.760588	0.11885	d	0
chr20_39995498_39995498	chr20	39995498	39995498	-	emilin3	nm_052846	1633	59	1006	123	347.189	-0.391544	0.228221	-1.71564	0.0862284	0.762641	0.11768	d	0
chr11_70708894_70708894	chr11	70708894	70708894	+	shank2-as3	nr_073536	576	24	284	56	125.904	-0.435661	0.253963	-1.71545	0.0862632	0.762641	0.11768	d	0
chr15_41786055_41786055	chr15	41786055	41786055	+	itpka	nm_002220	1130	36	653	78	227.359	-0.408988	0.238556	-1.71444	0.0864489	0.763461	0.117213	d	0
chr1_110254863_110254863	chr1	110254863	110254863	+	gstm5	nm_000851	230	15	140	19	57.7015	-0.461592	0.269358	-1.71367	0.0865886	0.763875	0.116978	d	0
chr15_66546075_66546075	chr15	66546075	66546075	-	megf11	nm_032445	1984	123	1348	236	534.79	-0.374645	0.218765	-1.71255	0.0867953	0.764059	0.116873	d	0
chr13_24736554_24736554	chr13	24736554	24736554	+	mir2276	nr_031753	298	16	149	31	70.623	-0.453589	0.265363	-1.70931	0.0873931	0.766955	0.11523	d	0
chr15_51630795_51630795	chr15	51630795	51630795	-	cyp19a1	nm_031226	698	55	458	98	207.866	-0.404798	0.237059	-1.70758	0.0877137	0.767131	0.11513	d	0
chr19_5568005_5568005	chr19	5568005	5568005	-	tincr	nr_027064	959	39	576	79	210.993	-0.407205	0.238607	-1.70659	0.0878985	0.767131	0.11513	d	0
chr8_21882353_21882353	chr8	21882353	21882353	+	npm2	nm_001286681	1337	68	830	139	326.258	-0.389513	0.228367	-1.70565	0.0880735	0.767131	0.11513	d	0
chr1_24526729_24526729	chr1	24526729	24526729	+	rp11-10n16.2	nr_027087	298	26	194	37	89.5033	-0.443348	0.259936	-1.70561	0.0880809	0.767131	0.11513	d	0
chr10_127464390_127464390	chr10	127464390	127464390	-	mmp21	nm_147191	586	33	347	63	146.387	-0.420549	0.246686	-1.70479	0.0882336	0.767131	0.11513	d	0
chr13_113760101_113760101	chr13	113760101	113760101	+	f7	nr_051961	585	27	309	59	133.839	-0.427089	0.250839	-1.70264	0.0886358	0.767131	0.11513	d	0
chr17_19314490_19314490	chr17	19314490	19314490	+	rnf112	nm_007148	281	16	150	28	67.9819	-0.452144	0.265749	-1.70139	0.0888689	0.767131	0.11513	d	0
chr19_7741942_7741942	chr19	7741942	7741942	+	c19orf59	nm_174918	983	50	535	114	238.667	-0.403964	0.23759	-1.70026	0.0890826	0.767131	0.11513	d	0
chr11_35547579_35547579	chr11	35547579	35547579	-	pamr1	nm_001282676	405	44	295	62	140.283	-0.424913	0.249919	-1.7002	0.089093	0.767131	0.11513	d	0
chr1_9086404_9086404	chr1	9086404	9086404	-	slc2a7	nm_207420	356	25	233	36	95.8992	-0.439414	0.258547	-1.69955	0.0892152	0.767131	0.11513	d	0
chr12_95228229_95228229	chr12	95228229	95228229	+	krt19p2	nr_036685	270	19	153	31	72.3877	-0.448723	0.264132	-1.69886	0.0893455	0.767131	0.11513	d	0
chr8_27491576_27491576	chr8	27491576	27491576	+	scara3	nm_016240	290	18	142	36	74.0804	-0.449141	0.26442	-1.69859	0.0893971	0.767131	0.11513	d	0
chr19_42212529_42212529	chr19	42212529	42212529	+	ceacam5	nm_004363	686	24	392	49	141.011	-0.423301	0.249373	-1.69746	0.0896091	0.767131	0.11513	d	0
chr11_120107348_120107348	chr11	120107348	120107348	+	pou2f3	nm_001244682	1224	84	852	150	343.637	-0.385297	0.227022	-1.69718	0.0896635	0.767131	0.11513	d	0
chr18_10414367_10414367	chr18	10414367	10414367	-	rp11-243e13.1	nr_110775	730	65	551	97	230.339	-0.40477	0.23867	-1.69594	0.0898977	0.767538	0.1149	d	0
chr19_35836415_35836415	chr19	35836415	35836415	+	mir5196	nr_049828	1108	59	658	125	275.458	-0.393181	0.232585	-1.69048	0.0909359	0.769585	0.113744	d	0
chr20_30225690_30225690	chr20	30225690	30225690	+	cox4i2	nm_032609	557	20	308	41	114.776	-0.430243	0.254617	-1.68976	0.0910735	0.769585	0.113744	d	0
chr11_299526_299526	chr11	299526	299526	-	ifitm5	nm_001025295	706	22	376	50	139.233	-0.424558	0.251338	-1.68919	0.0911826	0.769716	0.11367	d	0
chr8_143545376_143545376	chr8	143545376	143545376	+	bai1	nm_001702	926	25	490	60	175.098	-0.417599	0.247354	-1.68826	0.091361	0.770431	0.113266	d	0
chr20_61273796_61273796	chr20	61273796	61273796	+	slco4a1	nm_016354	1663	60	922	142	352.112	-0.390836	0.231609	-1.68748	0.0915113	0.770908	0.112997	d	0
chr16_84328311_84328311	chr16	84328311	84328311	+	wfdc1	nm_021197	1063	60	581	138	272.231	-0.395623	0.234875	-1.68439	0.0921056	0.772401	0.112157	d	0
chr19_54495541_54495541	chr19	54495541	54495541	+	cacng6	nm_031897	1457	51	835	116	305.14	-0.392077	0.232835	-1.68393	0.0921956	0.772401	0.112157	d	0
chr15_77363570_77363570	chr15	77363570	77363570	-	tspan3	nm_001168412	173	15	106	18	49.6921	-0.456775	0.271369	-1.68323	0.092331	0.772401	0.112157	d	0
chr19_12998017_12998017	chr19	12998017	12998017	-	klf1	nm_006563	1020	37	555	86	214.8	-0.405725	0.241051	-1.68315	0.0923462	0.772401	0.112157	d	0
chr4_74847841_74847841	chr4	74847841	74847841	-	pf4	nm_002619	461	39	292	68	141.13	-0.414658	0.246806	-1.6801	0.0929385	0.775777	0.110263	d	0
chr18_32957301_32957301	chr18	32957301	32957301	-	znf396	nm_145756	502	39	314	70	147.257	-0.412141	0.245714	-1.67732	0.0934804	0.777926	0.109062	d	0
chr22_32600718_32600718	chr22	32600718	32600718	-	rfpl2	nm_001159545	1073	23	514	64	188.398	-0.420298	0.250736	-1.67626	0.0936878	0.777926	0.109062	d	0
chr1_228645807_228645807	chr1	228645807	228645807	+	hist3h2bb	nm_175055	394	28	251	45	108.278	-0.426094	0.254563	-1.67382	0.0941653	0.779685	0.108081	d	0
chr14_94789688_94789688	chr14	94789688	94789688	-	serpina6	nm_001756	235	19	138	29	67.3544	-0.44419	0.265695	-1.6718	0.0945632	0.781406	0.107124	d	0
chr1_152131704_152131704	chr1	152131704	152131704	-	rptn	nm_001122965	255	28	174	38	87.1962	-0.43569	0.260886	-1.67004	0.0949117	0.781928	0.106833	d	0
chr3_195538844_195538844	chr3	195538844	195538844	-	muc4	nm_004532	1127	44	653	97	245.513	-0.394458	0.23628	-1.66945	0.0950283	0.782105	0.106735	d	0
chr3_50540892_50540892	chr3	50540892	50540892	-	cacna2d2	nm_006030	1895	80	1136	178	430.242	-0.374502	0.22506	-1.66401	0.0961113	0.785168	0.105037	d	0
chr19_55866182_55866182	chr19	55866182	55866182	-	cox6b2	nm_144613	1554	58	940	126	335.204	-0.38157	0.229381	-1.66347	0.0962177	0.785168	0.105037	d	0
chr9_138594030_138594030	chr9	138594030	138594030	+	kcnt1	nm_020822	1097	18	569	48	181.76	-0.416108	0.250188	-1.66318	0.096276	0.785168	0.105037	d	0
chr11_72929501_72929501	chr11	72929501	72929501	+	p2ry2	nm_176071	386	17	184	39	85.6111	-0.435917	0.262478	-1.66077	0.0967592	0.785168	0.105037	d	0
chr9_139641422_139641422	chr9	139641422	139641422	-	mir6722	nr_106780	881	25	462	61	169.484	-0.412088	0.248221	-1.66017	0.0968812	0.785168	0.105037	d	0
chr17_43510282_43510282	chr17	43510282	43510282	-	arhgap27	nm_174919	552	16	330	29	105.961	-0.42638	0.257093	-1.65847	0.0972228	0.785168	0.105037	d	0
chr17_18855477_18855477	chr17	18855477	18855477	+	slc5a10	nm_001270649	923	61	646	105	252.896	-0.388001	0.233953	-1.65846	0.0972255	0.785168	0.105037	d	0
chr17_76164670_76164670	chr17	76164670	76164670	+	syngr2	nm_004710	419	15	212	33	85.5458	-0.434655	0.262266	-1.6573	0.0974584	0.785168	0.105037	d	0
chr17_71733992_71733992	chr17	71733992	71733992	+	loc100134391	nm_001278587	407	23	202	51	101.65	-0.427338	0.257961	-1.6566	0.0976004	0.785168	0.105037	d	0
chr7_100663363_100663363	chr7	100663363	100663363	+	muc17	nm_001040105	477	19	232	45	102.293	-0.428913	0.258965	-1.65626	0.0976697	0.785168	0.105037	d	0
chr12_15374411_15374411	chr12	15374411	15374411	-	rerg	nm_001190726	577	63	427	98	205.206	-0.396725	0.239722	-1.65494	0.0979375	0.785168	0.105037	d	0
chr12_117799607_117799607	chr12	117799607	117799607	-	nos1	nm_001204218	1906	94	1248	191	463.913	-0.366447	0.221602	-1.65363	0.0982034	0.785168	0.105037	d	0
chr21_43809258_43809258	chr21	43809258	43809258	-	tmprss3	nm_032404	1224	92	849	170	362.224	-0.372468	0.225364	-1.65274	0.0983843	0.785168	0.105037	d	0
chr20_23860380_23860380	chr20	23860380	23860380	-	cst5	nm_001900	885	48	534	99	221.442	-0.391217	0.23686	-1.65168	0.0985991	0.785168	0.105037	d	0
chr3_98451079_98451079	chr3	98451079	98451079	+	st3gal6	nm_001271148	289	35	213	46	105.526	-0.424762	0.2576	-1.64892	0.0991636	0.785168	0.105037	d	0
chr3_24535577_24535577	chr3	24535577	24535577	+	thrb-as1	nr_046244	1030	91	763	153	330.174	-0.376715	0.228839	-1.6462	0.0997228	0.785168	0.105037	d	0
chr5_134375737_134375737	chr5	134375737	134375737	-	c5orf66-as1	nr_105049	1416	40	781	97	275.061	-0.390666	0.237397	-1.64562	0.0998417	0.785168	0.105037	d	0
chr12_95228173_95228173	chr12	95228173	95228173	+	mir492	nr_030171	270	19	154	32	72.9276	-0.434317	0.263939	-1.64552	0.0998622	0.785168	0.105037	d	0
chr9_117265495_117265495	chr9	117265495	117265495	-	dfnb31	nm_001083885	401	21	238	37	95.5173	-0.424453	0.257964	-1.64539	0.0998888	0.785168	0.105037	d	0
chr16_1290677_1290677	chr16	1290677	1290677	+	tpsab1	nm_003294	190	22	127	28	65.9892	-0.438806	0.266998	-1.64348	0.100283	0.785754	0.104713	d	0
chr19_46366548_46366548	chr19	46366548	46366548	-	sympk	nm_004819	900	38	519	83	201.858	-0.394963	0.240365	-1.64318	0.100346	0.785754	0.104713	d	0
chr17_73521782_73521782	chr17	73521782	73521782	+	llgl2	nm_004524	707	24	421	48	144.778	-0.408077	0.248608	-1.64145	0.100704	0.787814	0.103577	d	0
chr11_72929342_72929342	chr11	72929342	72929342	+	p2ry2	nm_002564	379	17	182	39	84.8727	-0.43064	0.262573	-1.64008	0.100988	0.787989	0.10348	d	0
chr15_40545378_40545378	chr15	40545378	40545378	+	pak6	nm_001276717	1418	61	857	133	323.853	-0.376527	0.229649	-1.63958	0.101093	0.787989	0.10348	d	0
chr20_62715712_62715712	chr20	62715712	62715712	-	lkaaear1	nm_001007125	1601	64	980	139	355.709	-0.373627	0.227891	-1.63949	0.10111	0.787989	0.10348	d	0
chr19_51472929_51472929	chr19	51472929	51472929	-	klk6	nm_002774	364	17	202	32	82.2376	-0.428476	0.261915	-1.63594	0.101853	0.792411	0.10105	d	0
chr19_47922785_47922785	chr19	47922785	47922785	-	meis3	nm_001009813	1471	53	844	123	312.67	-0.380511	0.232607	-1.63585	0.10187	0.792411	0.10105	d	0
chr17_72357958_72357958	chr17	72357958	72357958	-	btbd17	nm_001080466	1278	46	653	118	269.638	-0.392296	0.239974	-1.63474	0.102103	0.793466	0.100472	d	0
chr9_112260593_112260593	chr9	112260593	112260593	-	ptpn3	nm_001145368	775	55	534	96	219.789	-0.386231	0.236556	-1.63273	0.102526	0.794297	0.100017	d	0
chr1_27709805_27709805	chr1	27709805	27709805	-	cd164l2	nm_207397	468	19	225	46	101.41	-0.423274	0.259422	-1.6316	0.102763	0.794297	0.100017	d	0
chr3_10436246_10436246	chr3	10436246	10436246	-	mir885	nr_030614	669	31	353	72	155.225	-0.404481	0.248008	-1.63092	0.102908	0.794297	0.100017	d	0
chr15_42448839_42448839	chr15	42448839	42448839	-	pla2g4f	nr_033151	400	26	232	49	106.468	-0.415412	0.254766	-1.63056	0.102982	0.794297	0.100017	d	0
chr12_2880835_2880835	chr12	2880835	2880835	-	rp11-885b4.2	nr_033958	902	60	570	120	250.148	-0.379497	0.232981	-1.62888	0.103339	0.795975	0.0991007	d	0
chr20_60528718_60528718	chr20	60528718	60528718	-	mir1257	nr_031658	659	29	408	55	149.068	-0.401222	0.246852	-1.62536	0.104087	0.795975	0.0991007	d	0
chr13_109819651_109819651	chr13	109819651	109819651	-	myo16-as1	nr_047700	140	17	93	19	48.801	-0.441663	0.271835	-1.62475	0.104216	0.795975	0.0991007	d	0
chr16_3039054_3039054	chr16	3039054	3039054	+	linc00514	nr_033861	1102	19	512	58	182.948	-0.4127	0.254071	-1.62435	0.104301	0.795975	0.0991007	d	0
chr7_30739719_30739719	chr7	30739719	30739719	-	crhr2	nm_001202481	1643	106	1095	213	454.036	-0.35914	0.221178	-1.62376	0.104427	0.795975	0.0991007	d	0
chr20_23066977_23066977	chr20	23066977	23066977	-	cd93	nm_012072	651	29	360	64	148.314	-0.402824	0.24809	-1.6237	0.104439	0.795975	0.0991007	d	0
chr4_3465032_3465032	chr4	3465032	3465032	+	dok7	nm_001164673	1477	32	709	92	261.645	-0.3992	0.245989	-1.62284	0.104624	0.795975	0.0991007	d	0
chr8_21881620_21881620	chr8	21881620	21881620	+	npm2	nm_001286680	1329	62	843	128	314.421	-0.371848	0.229248	-1.62204	0.104796	0.796281	0.0989334	d	0
chr12_130388212_130388212	chr12	130388212	130388212	-	tmem132d	nm_133448	603	32	345	67	148.17	-0.400708	0.247272	-1.62052	0.105122	0.796886	0.0986036	d	0
chr1_38512450_38512450	chr1	38512450	38512450	-	pou3f1	nm_002699	1285	34	741	79	245.523	-0.386423	0.238483	-1.62034	0.10516	0.796886	0.0986036	d	0
chr8_22019183_22019183	chr8	22019183	22019183	+	sftpc	nm_001172410	1906	103	1185	225	484.834	-0.358888	0.221844	-1.61775	0.105717	0.800376	0.0967061	d	0
chr10_118033126_118033126	chr10	118033126	118033126	-	gfra1	nm_005264	385	21	250	32	93.01	-0.418946	0.259326	-1.61552	0.106198	0.800417	0.0966837	d	0
chr9_124262306_124262306	chr9	124262306	124262306	-	ggta1p	nr_045211	790	41	503	79	193.46	-0.38655	0.239639	-1.61305	0.106733	0.801924	0.0958669	d	0
chr17_71308143_71308143	chr17	71308143	71308143	-	cdc42ep4	nm_012121	168	17	114	19	52.8876	-0.436954	0.271014	-1.6123	0.106897	0.801924	0.0958669	d	0
chr9_136603479_136603479	chr9	136603479	136603479	-	sardh	nm_001134707	484	21	276	42	107.782	-0.41179	0.255575	-1.61123	0.107129	0.802448	0.0955831	d	0
chr22_32599464_32599464	chr22	32599464	32599464	-	rfpl2	nm_001098527	1088	30	561	78	208.611	-0.39539	0.245419	-1.61108	0.107162	0.802448	0.0955831	d	0
chr15_83776323_83776323	chr15	83776323	83776323	+	tm6sf1	nm_023003	757	31	390	76	167.353	-0.398979	0.247785	-1.61018	0.107357	0.802448	0.0955829	d	0
chr22_25615611_25615611	chr22	25615611	25615611	+	crybb2	nm_000496	787	59	511	114	231.798	-0.37671	0.234291	-1.60787	0.107863	0.805497	0.0939359	d	0
chr16_46603009_46603009	chr16	46603009	46603009	-	ankrd26p1	nr_026556	333	19	211	29	81.6139	-0.421402	0.262178	-1.60731	0.107986	0.805678	0.0938385	d	0
chr15_42158749_42158749	chr15	42158749	42158749	-	mir4310	nr_036195	326	16	180	30	75.1283	-0.423317	0.263862	-1.60431	0.108646	0.808402	0.0923728	d	0
chr10_73848531_73848531	chr10	73848531	73848531	-	spock2	nm_001244950	1454	66	916	140	341.186	-0.364685	0.227843	-1.6006	0.109467	0.808531	0.0923031	d	0
chr11_19528776_19528776	chr11	19528776	19528776	-	nav2-as5	nr_049725	303	19	166	36	78.4438	-0.42018	0.262547	-1.6004	0.109511	0.808531	0.0923031	d	0
chr6_168482237_168482237	chr6	168482237	168482237	-	frmd1	nr_110312	1132	35	542	97	225.224	-0.394288	0.246734	-1.59803	0.110036	0.80965	0.0917024	d	0
chr9_84304627_84304627	chr9	84304627	84304627	+	rp11-154d17.1	nr_109772	524	54	416	75	178.546	-0.393298	0.246359	-1.59645	0.110389	0.80965	0.0917024	d	0
chr7_44580914_44580914	chr7	44580914	44580914	-	npc1l1	nm_013389	477	22	274	44	109.173	-0.406574	0.255069	-1.59397	0.110942	0.812931	0.0899463	d	0
chr19_11530018_11530018	chr19	11530018	11530018	-	rgl3	nm_001035223	1256	27	668	71	224.633	-0.388391	0.244441	-1.5889	0.112084	0.816072	0.0882714	d	0
chr16_226678_226678	chr16	226678	226678	+	hba1	nm_000558	1212	67	811	131	309.683	-0.363259	0.228652	-1.5887	0.112129	0.816072	0.0882714	d	0
chr17_54671059_54671059	chr17	54671059	54671059	+	nog	nm_005450	293	15	152	30	68.8045	-0.422419	0.265912	-1.58857	0.112158	0.816072	0.0882714	d	0
chr17_74582145_74582145	chr17	74582145	74582145	-	st6galnac2	nm_006456	1175	59	702	131	287.408	-0.368444	0.232009	-1.58806	0.112274	0.816194	0.0882065	d	0
chr20_57875498_57875498	chr20	57875498	57875498	+	edn3	nm_000114	619	24	341	54	133.431	-0.398194	0.251235	-1.58495	0.112979	0.816258	0.0881724	d	0
chr8_143257699_143257699	chr8	143257699	143257699	+	mir4472-1	nr_039682	546	22	253	58	119.242	-0.408095	0.257553	-1.58451	0.113079	0.816258	0.0881724	d	0
chrX_103810995_103810995	chrX	103810995	103810995	+	il1rapl2	nm_017416	1037	44	639	93	235.229	-0.373975	0.236041	-1.58436	0.113111	0.816258	0.0881724	d	0
chr20_33880225_33880225	chr20	33880225	33880225	-	fam83c	nm_178468	536	26	303	55	126.332	-0.398426	0.251652	-1.58324	0.113366	0.816258	0.0881724	d	0
chr14_76071804_76071804	chr14	76071804	76071804	+	flvcr2	nm_001195283	434	26	245	53	112.152	-0.402001	0.253987	-1.58276	0.113475	0.816258	0.0881724	d	0
chr6_46459804_46459804	chr6	46459804	46459804	-	rcan2	nm_001251973	503	58	370	93	185.891	-0.381955	0.241353	-1.58256	0.113522	0.816258	0.0881724	d	0
chr9_137967088_137967088	chr9	137967088	137967088	+	olfm1	nm_014279	1184	47	641	116	261.335	-0.376647	0.238068	-1.5821	0.113627	0.816258	0.0881724	d	0
chr10_52834233_52834233	chr10	52834233	52834233	+	prkg1	nm_006258	301	24	199	36	87.2796	-0.411729	0.260381	-1.58126	0.113819	0.816258	0.0881724	d	0
chr17_56270088_56270088	chr17	56270088	56270088	+	epx	nm_000502	1324	55	672	144	297.79	-0.377289	0.238747	-1.58029	0.114041	0.816767	0.0879019	d	0
chr2_17721806_17721806	chr2	17721806	17721806	+	vsnl1	nm_003385	1098	92	776	171	346.161	-0.356838	0.226158	-1.57782	0.114606	0.818674	0.086889	d	0
chr3_127109513_127109513	chr3	127109513	127109513	-	rp11-88i21.2	nr_110147	1040	54	650	113	257.726	-0.368064	0.233373	-1.57715	0.114761	0.819066	0.086681	d	0
chr4_7461754_7461754	chr4	7461754	7461754	+	mir4274	nr_036238	807	30	380	82	172.003	-0.395637	0.251065	-1.57584	0.115063	0.819292	0.0865613	d	0
chr17_18853988_18853988	chr17	18853988	18853988	+	slc5a10	nm_001282417	1152	69	774	135	305.882	-0.359633	0.228693	-1.57256	0.115821	0.82047	0.0859371	d	0
chr19_51141302_51141302	chr19	51141302	51141302	-	syt3	nm_032298	1234	69	750	152	318.096	-0.361216	0.229702	-1.57254	0.115825	0.82047	0.0859371	d	0
chr11_369794_369794	chr11	369794	369794	+	b4galnt4	nm_178537	1385	45	804	106	284.763	-0.369191	0.234785	-1.57246	0.115843	0.82047	0.0859371	d	0
chr11_11374904_11374904	chr11	11374904	11374904	-	csnk2a3	nm_001256686	447	36	270	70	135.317	-0.389969	0.248007	-1.57241	0.115856	0.82047	0.0859371	d	0
chr3_52812508_52812508	chr3	52812508	52812508	+	itih1	nm_001166434	1134	67	748	134	299.265	-0.359707	0.229205	-1.56937	0.116562	0.821228	0.0855365	d	0
chr9_136501484_136501484	chr9	136501484	136501484	+	dbh	nm_000787	1719	70	1019	163	386.828	-0.357232	0.227937	-1.56724	0.117059	0.823308	0.0844377	d	0
chr8_22014344_22014344	chr8	22014344	22014344	-	lgi3	nm_139278	2193	123	1405	268	571.088	-0.343232	0.219123	-1.56639	0.117258	0.823308	0.0844377	d	0
chr20_2673523_2673523	chr20	2673523	2673523	+	ebf4	nm_001110514	1804	58	1057	138	370.981	-0.360136	0.229996	-1.56584	0.117387	0.823508	0.0843319	d	0
chr7_150130741_150130741	chr7	150130741	150130741	+	linc00996	nr_034033	649	66	485	108	224.264	-0.37051	0.237122	-1.56253	0.118163	0.82395	0.0840992	d	0
chr2_24232952_24232952	chr2	24232952	24232952	+	mfsd2b	nm_001080473	419	20	218	45	97.6227	-0.404053	0.258723	-1.56172	0.118353	0.82395	0.0840992	d	0
chr17_72462521_72462521	chr17	72462521	72462521	+	cd300a	nm_001256841	690	41	427	83	180.589	-0.376482	0.241217	-1.56076	0.11858	0.82395	0.0840992	d	0
chr9_137967102_137967102	chr9	137967102	137967102	+	olfm1	nm_006334	1182	47	641	117	261.627	-0.371202	0.238179	-1.5585	0.119115	0.82395	0.0840992	d	0
chr17_21279698_21279698	chr17	21279698	21279698	+	kcnj12	nm_021012	1151	39	668	91	239.917	-0.370762	0.237983	-1.55793	0.119249	0.82395	0.0840992	d	0
chr5_126984712_126984712	chr5	126984712	126984712	+	ctxn3	nm_001048252	345	45	273	61	134.302	-0.39356	0.252746	-1.55714	0.119438	0.82395	0.0840992	d	0
chr19_1491164_1491164	chr19	1491164	1491164	+	reep6	nm_138393	789	27	465	59	163.874	-0.382871	0.245884	-1.55712	0.119441	0.82395	0.0840992	d	0
chr14_94833039_94833039	chr14	94833039	94833039	-	serpina2	nm_006220	179	18	116	24	57.4363	-0.419016	0.269162	-1.55674	0.119531	0.82395	0.0840992	d	0
chr3_24536313_24536313	chr3	24536313	24536313	-	thrb	nm_000461	874	66	614	120	259.071	-0.361869	0.23246	-1.55669	0.119544	0.82395	0.0840992	d	0
chr17_4487833_4487833	chr17	4487833	4487833	+	smtnl2	nm_001114974	2191	89	1336	205	494.768	-0.347599	0.223324	-1.55648	0.119594	0.82395	0.0840992	d	0
chr9_140033608_140033608	chr9	140033608	140033608	+	grin1	nm_000832	1933	60	1087	150	391.872	-0.359818	0.231246	-1.55599	0.119709	0.82395	0.0840992	d	0
chr1_55505894_55505894	chr1	55505894	55505894	+	pcsk9	nr_110451	1337	93	970	170	383.1	-0.350545	0.225314	-1.55581	0.119754	0.82395	0.0840992	d	0
chr3_24562926_24562926	chr3	24562926	24562926	-	mir4792	nr_039955	1031	92	730	172	337.205	-0.352144	0.226504	-1.55469	0.12002	0.824395	0.0838646	d	0
chr1_206945839_206945839	chr1	206945839	206945839	-	il10	nm_000572	923	71	618	139	278.092	-0.35742	0.23013	-1.55312	0.120393	0.824896	0.0836007	d	0
chr19_10628668_10628668	chr19	10628668	10628668	-	s1pr5	nm_001166215	764	36	462	76	180.313	-0.375608	0.242324	-1.55002	0.121136	0.826491	0.0827621	d	0
chr1_26517118_26517118	chr1	26517118	26517118	+	catsper4	nm_198137	735	34	413	78	172.162	-0.379133	0.244645	-1.54972	0.121208	0.826491	0.0827621	d	0
chr5_997455_997455	chr5	997455	997455	-	loc100506688	nr_104615	1071	61	665	131	278.251	-0.358854	0.231872	-1.54764	0.121709	0.826491	0.0827621	d	0
chr12_94965128_94965128	chr12	94965128	94965128	-	mir7844	nr_106998	624	49	437	85	186.841	-0.371885	0.240463	-1.54654	0.121975	0.826491	0.0827621	d	0
chr1_20465822_20465822	chr1	20465822	20465822	+	pla2g2f	nm_022819	899	61	559	129	254.246	-0.3606	0.233186	-1.5464	0.122007	0.826491	0.0827621	d	0
chr1_197886516_197886516	chr1	197886516	197886516	+	lhx9	nm_020204	1473	86	949	183	389.546	-0.347471	0.224764	-1.54594	0.122119	0.826491	0.0827621	d	0
chr19_52003647_52003647	chr19	52003647	52003647	-	siglec12	nm_033329	367	23	222	42	96.0951	-0.397698	0.257413	-1.54498	0.122351	0.826491	0.0827621	d	0
chr1_21978348_21978348	chr1	21978348	21978348	-	rap1gap	nm_001145658	1604	64	919	155	357.879	-0.356345	0.230847	-1.54364	0.122675	0.826491	0.0827621	d	0
chr11_2170833_2170833	chr11	2170833	2170833	-	igf2	nm_001007139	1407	52	757	133	303.234	-0.365134	0.236574	-1.54342	0.122728	0.826491	0.0827621	d	0
chr19_58863335_58863335	chr19	58863335	58863335	+	a1bg-as1	nr_015380	927	25	510	62	177.827	-0.38107	0.246905	-1.54339	0.122737	0.826491	0.0827621	d	0
chr10_73848790_73848790	chr10	73848790	73848790	-	spock2	nm_014767	1435	64	905	139	335.795	-0.352305	0.228369	-1.5427	0.122903	0.826931	0.0825306	d	0
chr15_64338521_64338521	chr15	64338521	64338521	-	dapk2	nm_014326	813	60	558	112	238.308	-0.36073	0.233952	-1.54189	0.1231	0.826955	0.0825183	d	0
chr10_116286685_116286685	chr10	116286685	116286685	-	ablim1	nm_006720	450	33	316	52	127.746	-0.387196	0.25119	-1.54145	0.123208	0.826955	0.0825183	d	0
chr11_66059372_66059372	chr11	66059372	66059372	+	tmem151a	nm_153266	1090	39	584	99	231.302	-0.372067	0.24146	-1.5409	0.12334	0.827163	0.0824089	d	0
chr1_20250110_20250110	chr1	20250110	20250110	-	pla2g2e	nm_014589	972	29	474	81	191.815	-0.383958	0.249304	-1.54012	0.123531	0.827697	0.0821284	d	0
chr17_56358296_56358296	chr17	56358296	56358296	-	mpo	nm_000250	829	31	488	69	178.526	-0.374967	0.243634	-1.53906	0.12379	0.828155	0.0818886	d	0
chr17_79919057_79919057	chr17	79919057	79919057	-	notum	nm_178493	1420	30	830	73	256.546	-0.367538	0.23901	-1.53775	0.124109	0.829395	0.0812383	d	0
chr19_1490449_1490449	chr19	1490449	1490449	-	pcsk4	nm_017573	594	18	354	37	117.507	-0.39091	0.25436	-1.53684	0.124332	0.829395	0.0812383	d	0
chr1_226736500_226736500	chr1	226736500	226736500	+	c1orf95	nm_001003665	1476	86	1091	154	389.033	-0.347414	0.226223	-1.53571	0.124609	0.829973	0.0809361	d	0
chr5_128796102_128796102	chr5	128796102	128796102	+	adamts19	nm_133638	981	74	716	131	291.357	-0.354554	0.230939	-1.53527	0.124717	0.829973	0.0809361	d	0
chr4_47654685_47654685	chr4	47654685	47654685	+	mir8053	nr_107020	206	20	139	27	65.4232	-0.409158	0.266978	-1.53255	0.125386	0.829973	0.0809361	d	0
chrX_153141399_153141399	chrX	153141399	153141399	-	l1cam	nm_024003	568	25	331	53	129.221	-0.384554	0.251128	-1.53131	0.125693	0.829973	0.0809361	d	0
chr10_64134886_64134886	chr10	64134886	64134886	-	loc283045	nr_104162	308	26	193	45	93.844	-0.393982	0.257645	-1.52917	0.126223	0.829973	0.0809361	d	0
chr2_173292313_173292313	chr2	173292313	173292313	+	itga6	nm_001079818	328	25	207	43	94.5461	-0.393828	0.25763	-1.52866	0.126349	0.829973	0.0809361	d	0
chr5_76145825_76145825	chr5	76145825	76145825	+	s100z	nm_130772	395	27	251	48	108.492	-0.387951	0.25417	-1.52635	0.126924	0.829973	0.0809361	d	0
chr20_58179601_58179601	chr20	58179601	58179601	+	phactr3	nm_080672	1183	58	786	117	287.81	-0.351707	0.230578	-1.52533	0.127178	0.829973	0.0809361	d	0
chr6_150346668_150346668	chr6	150346668	150346668	-	raet1l	nm_130900	740	35	479	68	175.014	-0.369702	0.242463	-1.52478	0.127314	0.829973	0.0809361	d	0
chr21_46077848_46077848	chr21	46077848	46077848	+	krtap12-3	nm_198697	606	59	455	96	204.181	-0.36502	0.239437	-1.52449	0.127386	0.829973	0.0809361	d	0
chrX_135228860_135228860	chrX	135228860	135228860	+	fhl1	nr_027621	189	15	100	27	54.5334	-0.410622	0.269523	-1.52352	0.12763	0.829973	0.0809361	d	0
chr11_5248301_5248301	chr11	5248301	5248301	-	hbb	nm_000518	280	24	189	36	84.7158	-0.397721	0.261114	-1.52317	0.127716	0.829973	0.0809361	d	0
chr19_51645557_51645557	chr19	51645557	51645557	+	siglec7	nm_014385	526	27	323	53	127.588	-0.381538	0.250509	-1.52305	0.127746	0.829973	0.0809361	d	0
chr9_138591374_138591374	chr9	138591374	138591374	-	sohlh1	nm_001012415	763	17	416	43	138.022	-0.385554	0.253527	-1.52076	0.128319	0.829973	0.0809361	d	0
chr11_19545625_19545625	chr11	19545625	19545625	-	nav2-as4	nr_033989	302	18	165	36	77.0519	-0.400187	0.263163	-1.52068	0.128339	0.829973	0.0809361	d	0
chr17_75543022_75543022	chr17	75543022	75543022	+	loc100507351	nr_040050	841	46	528	96	213.567	-0.360699	0.237449	-1.51906	0.128748	0.829973	0.0809361	d	0
chr16_6069131_6069131	chr16	6069131	6069131	+	rbfox1	nm_018723	494	24	331	40	116.148	-0.385322	0.25373	-1.51863	0.128856	0.829973	0.0809361	d	0
chr16_2836708_2836708	chr16	2836708	2836708	-	prss33	nm_152891	1618	43	890	112	311.303	-0.359762	0.236905	-1.51859	0.128865	0.829973	0.0809361	d	0
chr15_65715410_65715410	chr15	65715410	65715410	-	igdcc4	nm_020962	385	21	245	36	94.3852	-0.391889	0.258344	-1.51693	0.129285	0.831105	0.0803442	d	0
chr4_8201059_8201059	chr4	8201059	8201059	+	sh3tc1	nm_018986	598	21	303	54	124.755	-0.387123	0.255393	-1.5158	0.129571	0.831743	0.0800108	d	0
chr10_133109984_133109984	chr10	133109984	133109984	-	tcerg1l	nm_174937	985	48	674	91	238.08	-0.356142	0.235026	-1.51533	0.129688	0.831743	0.0800108	d	0
chr20_62716368_62716368	chr20	62716368	62716368	+	oprl1	nm_001200019	1514	60	952	133	338.644	-0.346512	0.228779	-1.51461	0.129871	0.832269	0.0797362	d	0
chr3_10805877_10805877	chr3	10805877	10805877	-	linc00606	nr_027102	1389	87	932	179	380.708	-0.339531	0.224375	-1.51323	0.130222	0.832338	0.0797003	d	0
chr6_168643617_168643617	chr6	168643617	168643617	+	rp11-503c24.4	nr_110870	996	50	586	115	244.612	-0.356603	0.236021	-1.51089	0.130815	0.832338	0.0797003	d	0
chr17_48072588_48072588	chr17	48072588	48072588	-	dlx3	nm_005220	1090	52	675	114	261.939	-0.352977	0.23363	-1.51084	0.130829	0.832338	0.0797003	d	0
chr11_67407031_67407031	chr11	67407031	67407031	-	tbx10	nm_005995	1168	36	599	98	234.77	-0.36853	0.244029	-1.51019	0.130995	0.832338	0.0797003	d	0
chr15_75118950_75118950	chr15	75118950	75118950	+	cplx3	nm_001030005	1365	72	817	167	344.956	-0.345636	0.22905	-1.509	0.131299	0.832338	0.0797003	d	0
chr3_126236616_126236616	chr3	126236616	126236616	-	uroc1	nm_144639	656	27	351	66	146.39	-0.376902	0.250105	-1.50697	0.131817	0.834334	0.0786599	d	0
chr7_71802208_71802208	chr7	71802208	71802208	-	caln1	nm_001017440	1608	49	973	115	326.434	-0.348932	0.231663	-1.5062	0.132015	0.834943	0.0783432	d	0
chr10_123923104_123923104	chr10	123923104	123923104	+	tacc2	nm_006997	313	16	200	25	73.5599	-0.398355	0.264602	-1.50549	0.132199	0.835298	0.0781583	d	0
chr11_8060179_8060179	chr11	8060179	8060179	+	tub	nm_003320	397	24	225	50	103.62	-0.385139	0.256066	-1.50406	0.132565	0.835852	0.0778704	d	0
chr8_10512617_10512617	chr8	10512617	10512617	-	rp1l1	nm_178857	1241	93	919	169	370.466	-0.339976	0.226244	-1.5027	0.132917	0.836115	0.0777341	d	0
chr12_50344523_50344523	chr12	50344523	50344523	+	aqp2	nm_000486	597	22	317	54	127.118	-0.38113	0.253733	-1.50209	0.133074	0.836115	0.0777341	d	0
chr1_231323373_231323373	chr1	231323373	231323373	-	rp5-1097f14.3	nm_001256615	1129	78	793	150	323.494	-0.341482	0.227475	-1.50118	0.133308	0.836115	0.0777341	d	0
chr3_58572840_58572840	chr3	58572840	58572840	-	fam107a	nm_001282713	988	67	664	134	280.178	-0.345419	0.230241	-1.50025	0.133549	0.836115	0.0777341	d	0
chr4_8160559_8160559	chr4	8160559	8160559	-	ablim2	nm_001130084	1013	27	537	72	194.086	-0.370245	0.246859	-1.49983	0.13366	0.836115	0.0777341	d	0
chr17_5973933_5973933	chr17	5973933	5973933	+	wscd1	nm_015253	1417	75	888	167	359.006	-0.34068	0.227151	-1.49979	0.133668	0.836115	0.0777341	d	0
chr22_51039113_51039113	chr22	51039113	51039113	+	mapk8ip2	nm_012324	1287	61	821	132	309.706	-0.344445	0.229864	-1.49847	0.134011	0.837263	0.0771379	d	0
chr2_71047732_71047732	chr2	71047732	71047732	-	clec4f	nm_173535	859	61	572	122	248.986	-0.347251	0.232765	-1.49185	0.135739	0.843207	0.0740656	d	0
chr13_114018463_114018463	chr13	114018463	114018463	-	grtp1	nm_024719	770	28	477	59	164.613	-0.365691	0.245139	-1.49177	0.135759	0.843207	0.0740656	d	0
chr1_60539442_60539442	chr1	60539442	60539442	-	c1orf87	nm_152377	536	53	438	75	180.206	-0.366797	0.246406	-1.48859	0.136597	0.846343	0.0724535	d	0
chr17_25799035_25799035	chr17	25799035	25799035	+	ksr1	nm_014238	448	37	331	57	136.052	-0.371528	0.249999	-1.48612	0.137248	0.846757	0.0722414	d	0
chr11_1431672_1431672	chr11	1431672	1431672	+	brsk2	nm_001282218	572	21	338	45	121.635	-0.375859	0.252995	-1.48564	0.137375	0.846757	0.0722414	d	0
chr16_31225341_31225341	chr16	31225341	31225341	+	trim72	nm_001008274	1432	47	855	112	298.16	-0.346661	0.233577	-1.48414	0.137772	0.846757	0.0722414	d	0
chr5_142248475_142248475	chr5	142248475	142248475	-	arhgap26-as1	nr_046680	256	16	144	30	66.3498	-0.394738	0.266114	-1.48334	0.137984	0.846757	0.0722414	d	0
chr6_168479839_168479839	chr6	168479839	168479839	-	frmd1	nm_024919	1023	36	515	99	216.217	-0.364534	0.245797	-1.48307	0.138056	0.846757	0.0722414	d	0
chr17_7166264_7166264	chr17	7166264	7166264	-	cldn7	nm_001185023	805	20	381	60	149.726	-0.379208	0.255933	-1.48167	0.138428	0.846757	0.0722414	d	0
chr7_83270747_83270747	chr7	83270747	83270747	-	sema3e	nm_001178129	208	25	164	29	74.7897	-0.394849	0.266534	-1.48142	0.138494	0.846757	0.0722414	d	0
chr1_22970117_22970117	chr1	22970117	22970117	+	c1qc	nm_001114101	1013	39	542	101	222.342	-0.358655	0.242432	-1.4794	0.139033	0.846757	0.0722414	d	0
chr16_22825859_22825859	chr16	22825859	22825859	+	hs3st2	nm_006043	1266	64	805	140	313.914	-0.339784	0.229681	-1.47937	0.13904	0.846757	0.0722414	d	0
chr19_17799008_17799008	chr19	17799008	17799008	-	unc13a	nm_001080421	1120	36	665	85	230.768	-0.353173	0.238848	-1.47865	0.139233	0.846757	0.0722414	d	0
chr16_68014452_68014452	chr16	68014452	68014452	-	dpep3	nm_001129758	578	26	333	58	133.689	-0.370264	0.250466	-1.4783	0.139327	0.846757	0.0722414	d	0
chr4_6557405_6557405	chr4	6557405	6557405	-	ppp2r2c	nm_001206995	1499	85	900	200	393.843	-0.335367	0.22687	-1.47823	0.139345	0.846757	0.0722414	d	0
chr6_170581561_170581561	chr6	170581561	170581561	+	flj38122	nr_104177	1146	48	685	112	261.521	-0.347012	0.235062	-1.47625	0.139876	0.848753	0.0712189	d	0
chr19_14544165_14544165	chr19	14544165	14544165	+	pkn1	nm_002741	202	15	137	19	55.1836	-0.398378	0.270226	-1.47424	0.140416	0.850775	0.0701853	d	0
chr1_1115076_1115076	chr1	1115076	1115076	+	ttll10	nm_153254	1048	30	615	72	207.377	-0.356406	0.241986	-1.47284	0.140795	0.8519	0.0696113	d	0
chr14_94640648_94640648	chr14	94640648	94640648	+	ppp4r4	nm_020958	1001	70	682	140	289.184	-0.337709	0.229493	-1.47155	0.141143	0.853145	0.0689772	d	0
chr1_33352097_33352097	chr1	33352097	33352097	+	hpca	nm_002143	1684	73	1024	172	392.191	-0.33439	0.227282	-1.47125	0.141222	0.853145	0.0689772	d	0
chr22_32598537_32598537	chr22	32598537	32598537	-	rfpl2	nm_001159546	1120	31	609	82	218.408	-0.357796	0.243783	-1.46768	0.142191	0.85669	0.0671764	d	0
chr16_67034415_67034415	chr16	67034415	67034415	+	ces4a	nm_001190201	540	22	301	51	119.772	-0.37238	0.253843	-1.46697	0.142384	0.85669	0.0671764	d	0
chr1_47016887_47016887	chr1	47016887	47016887	-	kncn	nm_001097611	758	38	481	79	185.291	-0.353296	0.24105	-1.46565	0.142743	0.85669	0.0671764	d	0
chr2_98330030_98330030	chr2	98330030	98330030	+	zap70	nm_001079	627	25	372	55	138.455	-0.365126	0.249588	-1.46292	0.14349	0.85669	0.0671764	d	0
chr17_6616740_6616740	chr17	6616740	6616740	-	slc13a5	nm_177550	1251	71	803	155	327.891	-0.333823	0.22839	-1.46163	0.143842	0.85669	0.0671764	d	0
chr15_40545110_40545110	chr15	40545110	40545110	-	c15orf56	nm_001039905	1396	59	861	136	321.338	-0.336521	0.230317	-1.46113	0.143981	0.85669	0.0671764	d	0
chr19_3480540_3480540	chr19	3480540	3480540	-	smim24	nm_001136503	1168	46	718	105	260.552	-0.342891	0.234683	-1.46108	0.143993	0.85669	0.0671764	d	0
chr1_38100595_38100595	chr1	38100595	38100595	-	rspo1	nm_001242910	1813	96	1109	226	462.6	-0.327272	0.224112	-1.46031	0.144205	0.857308	0.0668633	d	0
chr19_42894444_42894444	chr19	42894444	42894444	-	cnfn	nm_032488	1147	42	650	105	248.037	-0.347981	0.23861	-1.45836	0.14474	0.858625	0.0661965	d	0
chr19_44306613_44306613	chr19	44306613	44306613	-	lypd5	nm_001031749	726	61	539	106	228.148	-0.3445	0.236288	-1.45797	0.14485	0.858658	0.06618	d	0
chr1_76540388_76540388	chr1	76540388	76540388	+	st6galnac3	nm_001160011	727	74	567	123	254.281	-0.342316	0.234938	-1.45705	0.145103	0.859465	0.0657718	d	0
chr19_376013_376013	chr19	376013	376013	-	theg	nm_199202	1169	35	620	95	234.098	-0.35397	0.243325	-1.45472	0.145746	0.859465	0.0657718	d	0
chr11_113258512_113258512	chr11	113258512	113258512	+	ankk1	nm_178510	1390	105	956	217	422.12	-0.322713	0.222095	-1.45304	0.146213	0.859798	0.0656033	d	0
chrX_153141500_153141500	chrX	153141500	153141500	-	l1cam	nm_000425	569	28	346	59	136.998	-0.361701	0.249059	-1.45227	0.146426	0.859798	0.0656033	d	0
chr7_150497621_150497621	chr7	150497621	150497621	-	tmem176b	nm_001101314	1366	60	890	130	319.956	-0.332828	0.22918	-1.45225	0.146431	0.859798	0.0656033	d	0
chr22_39745953_39745953	chr22	39745953	39745953	+	syngr1	nm_145731	557	30	352	60	139.455	-0.360168	0.24802	-1.45218	0.146452	0.859798	0.0656033	d	0
chr7_99766373_99766373	chr7	99766373	99766373	-	gal3st4	nm_024637	465	16	252	38	96.2268	-0.377111	0.259756	-1.45179	0.146561	0.859798	0.0656033	d	0
chrY_23756552_23756552	chrY	23756552	23756552	-	ttty13	nr_001537	222	24	200	21	74.2091	-0.391717	0.270061	-1.45047	0.146926	0.859798	0.0656033	d	0
chr2_176987412_176987412	chr2	176987412	176987412	+	hoxd9	nm_014213	985	61	655	126	268.185	-0.335469	0.231521	-1.44898	0.147344	0.860411	0.0652942	d	0
chr20_61002629_61002629	chr20	61002629	61002629	-	rbbp8nl	nm_080833	1363	40	800	99	273.351	-0.342574	0.236605	-1.44787	0.147653	0.861608	0.0646904	d	0
chr19_46713498_46713498	chr19	46713498	46713498	+	dkfzp434j0226	nr_027003	1190	90	857	174	359.544	-0.325921	0.225418	-1.44585	0.148219	0.863162	0.0639078	d	0
chr5_148206155_148206155	chr5	148206155	148206155	+	adrb2	nm_000024	280	18	140	41	75.364	-0.382561	0.264618	-1.44571	0.148258	0.863162	0.0639078	d	0
chr7_142552775_142552775	chr7	142552775	142552775	+	ephb6	nm_001280794	782	53	582	91	219.824	-0.344066	0.237997	-1.44568	0.148268	0.863162	0.0639078	d	0
chr7_101936368_101936368	chr7	101936368	101936368	+	mir4285	nr_036245	557	21	294	53	120.213	-0.368891	0.255294	-1.44497	0.148467	0.863162	0.0639078	d	0
chr6_39282236_39282236	chr6	39282236	39282236	-	kcnk17	nm_031460	1939	97	1261	217	483.15	-0.320253	0.221766	-1.4441	0.14871	0.863162	0.0639078	d	0
chr13_40755945_40755945	chr13	40755945	40755945	+	linc00332	nr_046870	205	29	159	38	83.0838	-0.37924	0.263281	-1.44044	0.149743	0.863162	0.0639078	d	0
chr19_42497619_42497619	chr19	42497619	42497619	-	atp1a3	nm_001256213	1446	49	770	133	303.837	-0.343516	0.238526	-1.44016	0.149821	0.863162	0.0639078	d	0
chr4_6202318_6202318	chr4	6202318	6202318	-	jakmip1	nm_001099433	1399	51	774	133	302.846	-0.340341	0.23639	-1.43974	0.149941	0.863162	0.0639078	d	0
chr11_67290899_67290899	chr11	67290899	67290899	-	cabp2	nm_016366	1099	32	607	84	218.671	-0.349707	0.24319	-1.438	0.150435	0.863162	0.0639078	d	0
chr8_142377365_142377365	chr8	142377365	142377365	-	gpr20	nm_005293	830	18	369	60	148.247	-0.372457	0.25916	-1.43717	0.15067	0.863162	0.0639078	d	0
chr22_40428335_40428335	chr22	40428335	40428335	+	loc100130899	nr_039988	625	42	397	87	175.772	-0.347047	0.241593	-1.43649	0.150862	0.863162	0.0639078	d	0
chr19_3029165_3029165	chr19	3029165	3029165	-	tle2	nm_003260	1162	58	707	135	287.383	-0.333709	0.232413	-1.43584	0.151047	0.863162	0.0639078	d	0
chr19_35782988_35782988	chr19	35782988	35782988	+	mag	nm_002361	1347	47	700	130	285.952	-0.344994	0.240545	-1.43422	0.15151	0.863162	0.0639078	d	0
chr13_61989655_61989655	chr13	61989655	61989655	-	pcdh20	nm_022843	1172	74	747	164	324.392	-0.327908	0.228686	-1.43388	0.151607	0.863162	0.0639078	d	0
chr15_101420008_101420008	chr15	101420008	101420008	+	aldh1a3	nm_000693	738	20	371	57	142.097	-0.365355	0.254902	-1.43332	0.151768	0.863162	0.0639078	d	0
chr16_80606705_80606705	chr16	80606705	80606705	-	linc01227	nr_104666	684	37	388	88	174.074	-0.350218	0.244405	-1.43294	0.151874	0.863162	0.0639078	d	0
chr1_15480228_15480228	chr1	15480228	15480228	+	tmem51	nm_018022	669	41	460	77	179.056	-0.345771	0.241335	-1.43274	0.151932	0.863162	0.0639078	d	0
chr1_202172904_202172904	chr1	202172904	202172904	+	lgr6	nm_021636	688	45	475	85	190.413	-0.34308	0.239607	-1.43184	0.152189	0.863162	0.0639078	d	0
chr4_6202459_6202459	chr4	6202459	6202459	+	rp11-586d19.1	nr_037863	1368	50	755	131	296.562	-0.339145	0.236906	-1.43156	0.152271	0.863162	0.0639078	d	0
chr1_173886516_173886516	chr1	173886516	173886516	-	serpinc1	nm_000488	270	21	191	30	77.6951	-0.377553	0.263756	-1.43145	0.152302	0.863162	0.0639078	d	0
chr1_111148975_111148975	chr1	111148975	111148975	-	kcna2	nm_004974	1905	84	1232	190	449.744	-0.319465	0.223362	-1.43026	0.152643	0.863753	0.0636103	d	0
chr22_39853324_39853324	chr22	39853324	39853324	+	mgat3	nm_002409	1417	38	844	94	276.825	-0.33789	0.236437	-1.42909	0.152977	0.865048	0.0629596	d	0
chr17_7166512_7166512	chr17	7166512	7166512	-	cldn7	nm_001185022	773	19	370	58	144.059	-0.36667	0.25671	-1.42834	0.153193	0.865144	0.0629118	d	0
chr20_30639990_30639990	chr20	30639990	30639990	+	hck	nm_001172130	1516	90	993	198	408.534	-0.320152	0.224148	-1.4283	0.153205	0.865144	0.0629118	d	0
chr19_38720354_38720354	chr19	38720354	38720354	-	dpf1	nm_001135156	569	27	340	59	135.251	-0.35656	0.249818	-1.42728	0.1535	0.86535	0.0628081	d	0
chr19_47975307_47975307	chr19	47975307	47975307	-	slc8a2	nm_015063	1304	47	772	115	281.97	-0.334936	0.234939	-1.42563	0.153976	0.867117	0.0619223	d	0
chr19_10628126_10628126	chr19	10628126	10628126	-	s1pr5	nm_030760	926	37	553	87	207.503	-0.342142	0.240317	-1.42371	0.15453	0.86918	0.0608902	d	0
chr12_113909877_113909877	chr12	113909877	113909877	-	lhx5	nm_022363	2569	135	1669	309	657.65	-0.309638	0.2177	-1.42232	0.154935	0.869537	0.0607117	d	0
chr8_143999259_143999259	chr8	143999259	143999259	-	cyp11b2	nm_000498	610	37	430	66	161.81	-0.347425	0.24446	-1.42119	0.15526	0.870771	0.060096	d	0
chr17_16395505_16395505	chr17	16395505	16395505	-	lrrc75a	nm_207387	1180	64	799	133	303.291	-0.32562	0.229202	-1.42067	0.155413	0.871034	0.0599648	d	0
chr6_39282237_39282237	chr6	39282237	39282237	-	kcnk17	nm_001135111	1940	96	1261	217	482.006	-0.315185	0.221952	-1.42006	0.155591	0.8714	0.0597826	d	0
chr22_19005346_19005346	chr22	19005346	19005346	+	dgcr9	nr_024159	857	50	612	93	225.715	-0.335284	0.236163	-1.41972	0.15569	0.8714	0.0597826	d	0
chr5_72469022_72469022	chr5	72469022	72469022	+	tmem174	nm_153217	930	79	679	149	298.293	-0.325047	0.229278	-1.4177	0.15628	0.872961	0.0590052	d	0
chr14_48144157_48144157	chr14	48144157	48144157	-	mdga2	nm_001113498	1502	83	1011	178	391.35	-0.317643	0.224437	-1.41529	0.156983	0.872961	0.0590052	d	0
chr7_150497853_150497853	chr7	150497853	150497853	+	tmem176a	nm_018487	1398	58	900	130	320.958	-0.324889	0.229561	-1.41526	0.156993	0.872961	0.0590052	d	0
chr2_219824349_219824349	chr2	219824349	219824349	+	cdk5r2	nm_003936	1939	86	1218	202	459.145	-0.317049	0.224043	-1.41513	0.157031	0.872961	0.0590052	d	0
chr22_20004522_20004522	chr22	20004522	20004522	+	tango2	nm_001283106	1061	34	576	91	218.525	-0.344372	0.243619	-1.41356	0.15749	0.874505	0.0582378	d	0
chrX_71526837_71526837	chrX	71526837	71526837	-	cited1	nm_004143	697	34	446	71	168.807	-0.34363	0.243453	-1.41149	0.158102	0.875951	0.0575203	d	0
chr3_183948316_183948316	chr3	183948316	183948316	+	vwa5b2	nm_138345	1996	98	1346	214	495.017	-0.311216	0.220993	-1.40826	0.159054	0.877156	0.0569231	d	0
chr2_8723922_8723922	chr2	8723922	8723922	-	ac011747.4	nr_110257	334	21	202	41	88.7916	-0.365333	0.259429	-1.40822	0.159066	0.877156	0.0569231	d	0
chr2_218933737_218933737	chr2	218933737	218933737	+	rufy4	nm_198483	1170	54	667	136	280.098	-0.331714	0.235746	-1.40708	0.159403	0.878428	0.0562939	d	0
chr17_2869189_2869189	chr17	2869189	2869189	-	loc101927911	nr_110818	600	41	414	77	169.487	-0.340884	0.242478	-1.40584	0.159772	0.878558	0.0562294	d	0
chr12_4918341_4918341	chr12	4918341	4918341	+	kcna6	nm_002235	1565	78	1038	171	389.489	-0.316449	0.225177	-1.40533	0.159922	0.878558	0.0562294	d	0
chr19_42133442_42133442	chr19	42133442	42133442	-	ceacam4	nm_001817	726	44	512	82	194.118	-0.336643	0.239552	-1.4053	0.159932	0.878558	0.0562294	d	0
chr7_6655526_6655526	chr7	6655526	6655526	+	znf853	nm_017560	1426	41	851	102	285.455	-0.331104	0.235638	-1.40514	0.159981	0.878558	0.0562294	d	0
chr3_125899645_125899645	chr3	125899645	125899645	-	aldh1l1	nm_012190	1043	63	742	123	281.531	-0.322431	0.230679	-1.39774	0.16219	0.879636	0.055697	d	0
chr12_132851976_132851976	chr12	132851976	132851976	+	loc100130238	nr_024563	1524	64	920	156	351.971	-0.321152	0.230001	-1.39631	0.162622	0.879636	0.055697	d	0
chr7_100612903_100612903	chr7	100612903	100612903	+	muc12	nm_001164462	2229	100	1346	247	531.183	-0.312593	0.223917	-1.39602	0.162708	0.879636	0.055697	d	0
chr3_38691163_38691163	chr3	38691163	38691163	-	scn5a	nm_001099404	1695	90	1072	210	435.277	-0.312247	0.224278	-1.39223	0.163852	0.879636	0.055697	d	0
chr3_38691164_38691164	chr3	38691164	38691164	-	scn5a	nm_001160160	1695	90	1072	210	435.277	-0.312247	0.224278	-1.39223	0.163852	0.879636	0.055697	d	0
chr22_20004309_20004309	chr22	20004309	20004309	-	arvcf	nm_001670	1022	34	564	90	213.883	-0.33871	0.243375	-1.39172	0.164006	0.879636	0.055697	d	0
chr7_129414609_129414609	chr7	129414609	129414609	-	mir96	nr_029512	1109	42	634	107	244.485	-0.332007	0.238984	-1.38924	0.164759	0.879636	0.055697	d	0
chr13_32420919_32420919	chr13	32420919	32420919	+	eef1dp3	nr_027062	538	62	463	89	199.902	-0.340285	0.245097	-1.38837	0.165025	0.879636	0.055697	d	0
chr15_27216428_27216428	chr15	27216428	27216428	+	gabrg3	nm_033223	641	35	403	75	163.581	-0.338934	0.244167	-1.38813	0.165098	0.879636	0.055697	d	0
chr19_10397642_10397642	chr19	10397642	10397642	+	icam4	nm_001039132	1243	34	647	98	242.549	-0.339547	0.244726	-1.38746	0.165303	0.879636	0.055697	d	0
chr15_54051859_54051859	chr15	54051859	54051859	-	wdr72	nm_182758	467	25	316	45	116.153	-0.351163	0.253105	-1.38742	0.165314	0.879636	0.055697	d	0
chr2_73496758_73496758	chr2	73496758	73496758	-	fbxo41	nm_001080410	1702	149	1307	284	562.052	-0.303522	0.218789	-1.38729	0.165355	0.879636	0.055697	d	0
chr17_42345502_42345502	chr17	42345502	42345502	-	slc4a1	nm_000342	693	33	401	79	166.96	-0.340458	0.245448	-1.38709	0.165414	0.879636	0.055697	d	0
chr1_50489626_50489626	chr1	50489626	50489626	-	agbl4	nm_032785	382	34	277	56	121.902	-0.349294	0.251906	-1.38661	0.165562	0.879636	0.055697	d	0
chr17_72527613_72527613	chr17	72527613	72527613	-	cd300lb	nm_174892	576	22	317	55	125.879	-0.351529	0.253648	-1.38589	0.16578	0.879636	0.055697	d	0
chrX_85403454_85403454	chrX	85403454	85403454	+	dach2	nm_053281	600	49	476	77	184.684	-0.33729	0.243463	-1.38539	0.165935	0.879636	0.055697	d	0
chr19_43099082_43099082	chr19	43099082	43099082	-	ceacam8	nm_001816	1059	50	656	116	256.242	-0.324852	0.23464	-1.38447	0.166215	0.880552	0.0552449	d	0
chr4_37243613_37243613	chr4	37243613	37243613	-	mir4801	nr_039965	830	51	558	105	225.491	-0.325787	0.235455	-1.38365	0.166466	0.881273	0.0548895	d	0
chr12_130526887_130526887	chr12	130526887	130526887	-	rp11-474d1.3	nr_024457	213	15	135	24	58.1595	-0.371244	0.268628	-1.382	0.166972	0.882244	0.0544114	d	0
chr22_22599199_22599199	chr22	22599199	22599199	+	vpreb1	nm_007128	1267	57	738	143	300.944	-0.323234	0.233956	-1.3816	0.167095	0.882244	0.0544114	d	0
chr14_95027756_95027756	chr14	95027756	95027756	+	serpina4	nm_006215	335	22	192	47	91.9414	-0.357707	0.258959	-1.38133	0.167178	0.882244	0.0544114	d	0
chr20_51801821_51801821	chr20	51801821	51801821	+	tshz2	nm_001193421	835	86	661	149	297.638	-0.319175	0.231286	-1.38	0.167587	0.883173	0.0539543	d	0
chr15_40398287_40398287	chr15	40398287	40398287	-	bmf	nm_001003942	306	16	172	34	74.6304	-0.364356	0.26412	-1.37951	0.167738	0.883173	0.0539543	d	0
chr15_40531997_40531997	chr15	40531997	40531997	+	pak6	nm_020168	584	28	386	55	139.882	-0.342359	0.248241	-1.37914	0.167852	0.883173	0.0539543	d	0
chr11_129685740_129685740	chr11	129685740	129685740	+	tmem45b	nm_138788	842	32	610	57	185.997	-0.334296	0.242808	-1.37679	0.168577	0.884781	0.053164	d	0
chr11_44995452_44995452	chr11	44995452	44995452	+	ac068858.1	nr_026681	511	33	325	68	140.69	-0.340273	0.24741	-1.37534	0.169026	0.886052	0.0525406	d	0
chr8_22785421_22785421	chr8	22785421	22785421	-	pebp4	nm_144962	1092	56	689	128	274.555	-0.319975	0.232774	-1.37462	0.169249	0.886052	0.0525406	d	0
chr7_94539209_94539209	chr7	94539209	94539209	+	ppp1r9a	nm_001166162	1001	90	760	167	332.69	-0.312706	0.227546	-1.37425	0.169363	0.886052	0.0525406	d	0
chr21_34542541_34542541	chr21	34542541	34542541	-	c21orf54	nr_024102	1180	99	896	186	378.587	-0.309151	0.225271	-1.37235	0.169955	0.887067	0.0520436	d	0
chr7_71877360_71877360	chr7	71877360	71877360	-	caln1	nm_031468	262	27	177	46	90.4195	-0.354812	0.258653	-1.37177	0.170135	0.887067	0.0520436	d	0
chr6_90276556_90276556	chr6	90276556	90276556	+	ankrd6	nm_001242814	154	21	118	26	60.174	-0.369369	0.269359	-1.37129	0.170285	0.887067	0.0520436	d	0
chr3_49191834_49191834	chr3	49191834	49191834	-	lamb2p1	nr_004405	261	22	196	30	78.6297	-0.36184	0.263962	-1.37081	0.170435	0.887067	0.0520436	d	0
chr2_42180943_42180943	chr2	42180943	42180943	-	c2orf91	nm_001242815	432	28	238	66	119.715	-0.347554	0.253758	-1.36963	0.170803	0.887067	0.0520436	d	0
chr17_8869029_8869029	chr17	8869029	8869029	-	pik3r5	nm_001251851	964	49	642	104	240.709	-0.321304	0.234616	-1.36949	0.170847	0.887067	0.0520436	d	0
chr2_113670547_113670547	chr2	113670547	113670547	+	il37	nm_014439	746	69	583	119	249.274	-0.321243	0.234833	-1.36796	0.171324	0.887067	0.0520436	d	0
chr19_51320936_51320936	chr19	51320936	51320936	+	mgc45922	nr_038359	1291	51	732	133	290.482	-0.323091	0.236357	-1.36696	0.171637	0.887067	0.0520436	d	0
chr2_128293377_128293377	chr2	128293377	128293377	+	myo7b	nm_001080527	597	41	411	79	169.889	-0.330922	0.242287	-1.36582	0.171995	0.887067	0.0520436	d	0
chr17_7185053_7185053	chr17	7185053	7185053	+	slc2a4	nm_001042	928	41	594	91	217.945	-0.324982	0.237957	-1.36572	0.172028	0.887067	0.0520436	d	0
chr16_2034149_2034149	chr16	2034149	2034149	+	gfer	nm_005262	650	25	384	59	143.165	-0.340331	0.249334	-1.36496	0.172266	0.887067	0.0520436	d	0
chr19_51017947_51017947	chr19	51017947	51017947	-	aspdh	nm_001024656	501	16	303	35	102.214	-0.351519	0.257701	-1.36405	0.17255	0.887067	0.0520436	d	0
chr17_80317122_80317122	chr17	80317122	80317122	+	tex19	nm_207459	799	51	585	94	220.365	-0.322848	0.236834	-1.36318	0.172826	0.887067	0.0520436	d	0
chr16_20416033_20416033	chr16	20416033	20416033	-	pdilt	nm_174924	141	16	98	21	48.9986	-0.370028	0.271453	-1.36314	0.172839	0.887067	0.0520436	d	0
chr11_8285425_8285425	chr11	8285425	8285425	-	lmo1	nm_002315	1295	77	873	167	350.316	-0.308274	0.226388	-1.36171	0.17329	0.888182	0.0514981	d	0
chr22_39353526_39353526	chr22	39353526	39353526	+	apobec3a	nm_001270406	1084	47	664	112	253.47	-0.320702	0.235564	-1.36142	0.17338	0.888182	0.0514981	d	0
chr17_6561037_6561037	chr17	6561037	6561037	+	alox15p1	nr_045985	748	29	542	51	166.107	-0.334021	0.245622	-1.3599	0.173862	0.888751	0.0512201	d	0
chr9_34376894_34376894	chr9	34376894	34376894	-	kiaa1161	nm_020702	280	17	164	34	73.0621	-0.359076	0.264133	-1.35945	0.174003	0.888751	0.0512201	d	0
chr7_150652917_150652917	chr7	150652917	150652917	-	kcnh2	nm_172057	1195	35	659	96	240.045	-0.328774	0.242295	-1.35692	0.174808	0.888751	0.0512201	d	0
chr19_36347809_36347809	chr19	36347809	36347809	+	kirrel2	nm_199179	1618	83	1069	187	409.827	-0.304686	0.224555	-1.35684	0.174831	0.888751	0.0512201	d	0
chr9_138453603_138453603	chr9	138453603	138453603	+	paep	nm_002571	275	18	175	32	73.9365	-0.357317	0.263743	-1.35479	0.175485	0.88949	0.0508589	d	0
chr2_238499769_238499769	chr2	238499769	238499769	-	rab17	nr_033308	278	20	171	38	78.9946	-0.354905	0.262026	-1.35447	0.175588	0.88949	0.0508589	d	0
chr17_41856368_41856368	chr17	41856368	41856368	-	dusp3	nm_004090	269	22	187	35	80.7539	-0.354836	0.262089	-1.35388	0.175776	0.88949	0.0508589	d	0
chr1_20617411_20617411	chr1	20617411	20617411	+	vwa5b1	nm_001039500	1878	114	1197	269	517.011	-0.299856	0.221573	-1.3533	0.175958	0.88949	0.0508589	d	0
chr1_17445948_17445948	chr1	17445948	17445948	-	padi2	nm_007365	1341	57	784	145	311.822	-0.316141	0.233679	-1.35288	0.176093	0.88949	0.0508589	d	0
chr22_19701986_19701986	chr22	19701986	19701986	+	38596	nm_002688	489	17	292	38	102.871	-0.34817	0.257399	-1.35265	0.176167	0.88949	0.0508589	d	0
chr17_79139872_79139872	chr17	79139872	79139872	-	aatk	nm_001080395	1410	35	772	99	268.578	-0.326812	0.241645	-1.35245	0.176232	0.88949	0.0508589	d	0
chr9_4850296_4850296	chr9	4850296	4850296	+	mir101-2	nr_029836	144	20	112	24	56.7155	-0.365453	0.270387	-1.35159	0.176505	0.889777	0.0507186	d	0
chr3_169381563_169381563	chr3	169381563	169381563	-	mecom	nm_004991	553	41	381	79	163.729	-0.328416	0.243075	-1.35109	0.176668	0.889777	0.0507186	d	0
chr21_45993605_45993605	chr21	45993605	45993605	+	krtap10-4	nm_198687	636	37	412	78	167.77	-0.328315	0.243109	-1.35048	0.176861	0.889777	0.0507186	d	0
chr19_51472047_51472047	chr19	51472047	51472047	-	klk6	nm_001012964	364	17	211	37	85.2857	-0.352605	0.261304	-1.3494	0.177207	0.889777	0.0507186	d	0
chr5_137056999_137056999	chr5	137056999	137056999	-	klhl3	nm_001257194	177	22	129	31	66.4741	-0.359791	0.266715	-1.34897	0.177346	0.889777	0.0507186	d	0
chr3_150966998_150966998	chr3	150966998	150966998	-	p2ry14	nm_001081455	331	36	275	49	116.897	-0.345972	0.256507	-1.34878	0.177407	0.889777	0.0507186	d	0
chr1_18434239_18434239	chr1	18434239	18434239	+	igsf21	nm_032880	2238	98	1313	253	529.301	-0.304808	0.226025	-1.34856	0.177479	0.889777	0.0507186	d	0
chr19_50706884_50706884	chr19	50706884	50706884	+	myh14	nm_024729	825	44	503	103	210.819	-0.322279	0.239118	-1.34779	0.177727	0.889866	0.0506753	d	0
chr3_10857916_10857916	chr3	10857916	10857916	+	slc6a11	nm_014229	1420	107	1113	197	431.614	-0.30181	0.223979	-1.34749	0.177822	0.889866	0.0506753	d	0
chr6_157802556_157802556	chr6	157802556	157802556	+	zdhhc14	nm_024630	399	32	292	53	120.773	-0.339744	0.25234	-1.34637	0.178182	0.890587	0.0503239	d	0
chr19_51961708_51961708	chr19	51961708	51961708	-	siglec8	nm_014442	551	25	325	58	129.592	-0.338307	0.251344	-1.34599	0.178305	0.89066	0.0502882	d	0
chr11_57283192_57283192	chr11	57283192	57283192	-	slc43a1	nm_003627	204	17	125	30	61.7276	-0.359573	0.267241	-1.3455	0.178463	0.890752	0.0502431	d	0
chr17_47588178_47588178	chr17	47588178	47588178	+	mir6165	nr_106751	1174	49	638	133	270.413	-0.322093	0.239435	-1.34522	0.178553	0.890752	0.0502431	d	0
chr14_23877486_23877486	chr14	23877486	23877486	-	myh6	nm_002471	1343	66	819	161	333.295	-0.309693	0.230397	-1.34417	0.178894	0.890752	0.0502431	d	0
chr20_3644046_3644046	chr20	3644046	3644046	-	gfra4	nm_145762	1544	62	919	157	351.5	-0.310719	0.231268	-1.34354	0.179097	0.890752	0.0502431	d	0
chr17_43507663_43507663	chr17	43507663	43507663	-	arhgap27	nm_001282290	918	22	644	42	176.052	-0.329759	0.245475	-1.34335	0.179159	0.890752	0.0502431	d	0
chrX_68725077_68725077	chrX	68725077	68725077	+	fam155b	nm_015686	860	29	502	73	181.607	-0.329097	0.245033	-1.34307	0.179248	0.890752	0.0502431	d	0
chr1_37499844_37499844	chr1	37499844	37499844	-	grik3	nm_000831	1596	37	850	109	297.34	-0.324861	0.241886	-1.34303	0.179261	0.890752	0.0502431	d	0
chr8_21646346_21646346	chr8	21646346	21646346	-	gfra2	nm_001165038	1832	81	1229	182	436.305	-0.300036	0.223427	-1.34288	0.179311	0.890752	0.0502431	d	0
chr18_24445716_24445716	chr18	24445716	24445716	-	aqp4	nm_001650	575	37	378	76	158.985	-0.327664	0.244111	-1.34228	0.179505	0.890752	0.0502431	d	0
chr12_6420098_6420098	chr12	6420098	6420098	+	plekhg6	nm_001144856	627	27	361	66	144.925	-0.334556	0.249308	-1.34194	0.179616	0.890752	0.0502431	d	0
chr20_31619453_31619453	chr20	31619453	31619453	+	bpifb6	nm_174897	1246	68	741	169	324.751	-0.310272	0.231563	-1.3399	0.180277	0.891156	0.0500463	d	0
chr7_150498448_150498448	chr7	150498448	150498448	-	tmem176b	nm_014020	1452	57	921	135	328.179	-0.308176	0.230125	-1.33917	0.180517	0.891156	0.0500463	d	0
chr16_20085100_20085100	chr16	20085100	20085100	-	gpr139	nm_001002911	932	34	504	93	202.76	-0.327936	0.245239	-1.33721	0.181154	0.89242	0.0494308	d	0
chr14_105647660_105647660	chr14	105647660	105647660	-	nudt14	nm_177533	808	21	444	58	155.777	-0.335766	0.251331	-1.33595	0.181566	0.893284	0.0490105	d	0
chr11_64490660_64490660	chr11	64490660	64490660	-	nrxn2	nm_138732	1402	55	741	155	315.069	-0.318991	0.238889	-1.33531	0.181776	0.893284	0.0490105	d	0
chr3_195938300_195938300	chr3	195938300	195938300	-	zdhhc19	nm_001039617	745	32	478	70	172.562	-0.325165	0.24352	-1.33527	0.181789	0.893284	0.0490105	d	0
chr1_28503455_28503455	chr1	28503455	28503455	-	ptafr	nm_000952	346	22	240	37	92.4835	-0.345695	0.258945	-1.33501	0.181873	0.893284	0.0490105	d	0
chr3_125898907_125898907	chr3	125898907	125898907	+	aldh1l1-as2	nr_046383	977	47	669	98	238.944	-0.312884	0.234812	-1.33249	0.1827	0.895571	0.0479002	d	0
chr1_109792640_109792640	chr1	109792640	109792640	+	celsr2	nm_001408	397	19	233	42	94.5746	-0.344758	0.258843	-1.33192	0.182886	0.895571	0.0479002	d	0
chr2_113672769_113672769	chr2	113672769	113672769	+	il37	nm_173205	706	47	469	99	200.128	-0.317311	0.238251	-1.33184	0.182914	0.895571	0.0479002	d	0
chr8_10530146_10530146	chr8	10530146	10530146	+	c8orf74	nm_001040032	470	23	274	53	113.908	-0.339024	0.254599	-1.3316	0.182992	0.895571	0.0479002	d	0
chr3_125900029_125900029	chr3	125900029	125900029	-	aldh1l1	nm_001270364	1105	69	801	137	305.353	-0.304569	0.228898	-1.33059	0.183324	0.895599	0.0478863	d	0
chr1_16539104_16539104	chr1	16539104	16539104	-	arhgef19	nm_153213	304	16	179	33	74.6265	-0.351041	0.263913	-1.33014	0.183472	0.895788	0.0477948	d	0
chr21_41239346_41239346	chr21	41239346	41239346	+	pcp4	nm_006198	591	44	407	87	176.352	-0.319954	0.241077	-1.32719	0.184446	0.897045	0.0471856	d	0
chr18_77623667_77623667	chr18	77623667	77623667	+	kcng2	nm_012283	762	40	486	89	193.026	-0.318903	0.240378	-1.32667	0.184616	0.897045	0.0471856	d	0
chr5_179780315_179780315	chr5	179780315	179780315	-	gfpt2	nm_005110	666	21	384	53	136.841	-0.334159	0.251879	-1.32667	0.184619	0.897045	0.0471856	d	0
chr1_212873327_212873327	chr1	212873327	212873327	-	batf3	nm_018664	954	83	754	148	311.208	-0.305174	0.230094	-1.3263	0.18474	0.897045	0.0471856	d	0
chr1_41249683_41249683	chr1	41249683	41249683	+	kcnq4	nm_172163	857	27	445	78	176.213	-0.331652	0.250104	-1.32606	0.184821	0.897045	0.0471856	d	0
chr22_42310671_42310671	chr22	42310671	42310671	-	shisa8	nm_001207020	2183	73	1358	182	466.04	-0.298889	0.225959	-1.32275	0.185918	0.89895	0.0462643	d	0
chrX_70443055_70443055	chrX	70443055	70443055	+	gjb1	nm_000166	413	21	255	44	101.135	-0.339517	0.256675	-1.32275	0.185919	0.89895	0.0462643	d	0
chr12_47219780_47219780	chr12	47219780	47219780	-	slc38a4	nm_018018	141	22	118	25	59.8978	-0.357196	0.270331	-1.32133	0.186392	0.89895	0.0462643	d	0
chr11_57228009_57228009	chr11	57228009	57228009	+	rtn4rl2	nm_178570	1567	44	954	112	313.995	-0.308955	0.233977	-1.32045	0.186684	0.89895	0.0462643	d	0
chr17_1182956_1182956	chr17	1182956	1182956	+	tusc5	nm_172367	1032	27	582	74	200.445	-0.324308	0.245613	-1.3204	0.186701	0.89895	0.0462643	d	0
chr16_27078218_27078218	chr16	27078218	27078218	+	c16orf82	nm_001145545	632	43	465	78	179.411	-0.318738	0.241831	-1.31802	0.187498	0.899561	0.0459695	d	0
chr5_126988706_126988706	chr5	126988706	126988706	+	ctxn3	nm_001127385	473	53	382	85	174.776	-0.321817	0.244299	-1.3173	0.187737	0.899561	0.0459695	d	0
chr10_125651500_125651500	chr10	125651500	125651500	-	cpxm2	nm_198148	729	31	440	74	168.548	-0.322678	0.245019	-1.31695	0.187856	0.899561	0.0459695	d	0
chr22_24819564_24819564	chr22	24819564	24819564	+	adora2a	nm_001278500	1006	19	521	60	176.901	-0.333148	0.252996	-1.31681	0.187901	0.899561	0.0459695	d	0
chr12_128751947_128751947	chr12	128751947	128751947	+	tmem132c	nm_001136103	1005	36	643	83	218.677	-0.314083	0.238611	-1.3163	0.188074	0.899561	0.0459695	d	0
chr3_128186091_128186091	chr3	128186091	128186091	-	dnajb8	nm_153330	1487	90	961	210	408.841	-0.29587	0.225121	-1.31427	0.188754	0.90124	0.0451597	d	0
chr7_150688143_150688143	chr7	150688143	150688143	+	nos3	nm_000603	692	25	448	54	149.863	-0.325238	0.247554	-1.3138	0.188912	0.9013	0.0451306	d	0
chr12_110152186_110152186	chr12	110152186	110152186	+	fam222a	nm_032829	1154	54	701	133	280.413	-0.307267	0.233979	-1.31323	0.189107	0.9013	0.0451306	d	0
chr18_3878179_3878179	chr18	3878179	3878179	+	dlgap1-as3	nr_038895	743	76	635	120	262.586	-0.311123	0.237553	-1.3097	0.190297	0.901978	0.0448041	d	0
chr2_128181194_128181194	chr2	128181194	128181194	-	mir4783	nr_039944	906	21	513	58	169.688	-0.326724	0.249509	-1.30947	0.190375	0.901978	0.0448041	d	0
chr9_124882446_124882446	chr9	124882446	124882446	-	mir4478	nr_039690	318	17	180	38	79.3298	-0.344146	0.262923	-1.30892	0.19056	0.901978	0.0448041	d	0
chr9_33447631_33447631	chr9	33447631	33447631	-	aqp3	nm_004925	474	22	305	45	112.085	-0.332626	0.254147	-1.30879	0.190605	0.901978	0.0448041	d	0
chr8_29208267_29208267	chr8	29208267	29208267	-	dusp4	nm_001394	1102	23	538	76	198.26	-0.330959	0.252961	-1.30834	0.190758	0.901978	0.0448041	d	0
chr5_45696220_45696220	chr5	45696220	45696220	-	hcn1	nm_021072	810	54	618	97	229.158	-0.309784	0.236782	-1.30831	0.190769	0.901978	0.0448041	d	0
chr20_30407177_30407177	chr20	30407177	30407177	+	mylk2	nm_033118	212	16	146	24	60.2617	-0.350954	0.268322	-1.30796	0.190887	0.901978	0.0448041	d	0
chr2_100759037_100759037	chr2	100759037	100759037	-	aff3	nm_002285	663	65	507	118	230.612	-0.307718	0.235397	-1.30723	0.191134	0.901978	0.0448041	d	0
chr19_51919159_51919159	chr19	51919159	51919159	+	loc100129083	nm_001256795	341	19	224	35	86.1081	-0.340436	0.260445	-1.30713	0.191168	0.901978	0.0448041	d	0
chr19_3880617_3880617	chr19	3880617	3880617	+	atcay	nm_033064	1469	54	970	124	325.166	-0.300162	0.229698	-1.30676	0.191293	0.901978	0.0448041	d	0
chr17_4487275_4487275	chr17	4487275	4487275	+	smtnl2	nm_198501	2204	80	1345	204	485.129	-0.295526	0.226166	-1.30668	0.191322	0.901978	0.0448041	d	0
chr7_151130725_151130725	chr7	151130725	151130725	-	mir3907	nr_037468	592	15	296	46	112.694	-0.33981	0.26043	-1.3048	0.19196	0.904467	0.0436074	d	0
chr19_35739558_35739558	chr19	35739558	35739558	+	lsr	nm_205834	1674	72	1052	176	394.412	-0.295786	0.227284	-1.3014	0.193123	0.907182	0.0423056	d	0
chr16_2069520_2069520	chr16	2069520	2069520	+	npw	nm_001099456	1004	19	508	62	176.512	-0.330537	0.254034	-1.30115	0.193207	0.907182	0.0423056	d	0
chr1_22963117_22963117	chr1	22963117	22963117	+	c1qa	nm_015991	1413	57	855	144	323.359	-0.302225	0.232289	-1.30107	0.193235	0.907182	0.0423056	d	0
chr8_139926236_139926236	chr8	139926236	139926236	-	col22a1	nm_152888	793	46	546	95	210.814	-0.308378	0.2372	-1.30008	0.193574	0.907182	0.0423056	d	0
chr22_39493228_39493228	chr22	39493228	39493228	+	apobec3h	nm_181773	370	25	273	40	102.324	-0.334233	0.257133	-1.29985	0.193654	0.907182	0.0423056	d	0
chr9_139642980_139642980	chr9	139642980	139642980	-	lcn6	nm_198946	689	27	420	64	154.157	-0.321283	0.247258	-1.29938	0.193812	0.907182	0.0423056	d	0
chr20_23016056_23016056	chr20	23016056	23016056	+	sstr4	nm_001052	1516	60	907	154	344.391	-0.301207	0.231832	-1.29924	0.19386	0.907182	0.0423056	d	0
chr3_126243130_126243130	chr3	126243130	126243130	+	chst13	nm_152889	984	32	547	88	205.986	-0.317389	0.244769	-1.29669	0.194739	0.908406	0.0417198	d	0
chr1_39549838_39549838	chr1	39549838	39549838	+	macf1	nm_012090	529	37	385	67	151.813	-0.318608	0.24588	-1.29578	0.19505	0.908406	0.0417198	d	0
chr5_140372_140372	chr5	140372	140372	+	plekhg4b	nm_052909	575	31	356	70	147.006	-0.320532	0.2474	-1.2956	0.195113	0.908406	0.0417198	d	0
chr22_44576769_44576769	chr22	44576769	44576769	+	parvg	nm_022141	507	22	299	52	117.391	-0.328899	0.253974	-1.29501	0.195316	0.908406	0.0417198	d	0
chr2_100722045_100722045	chr2	100722045	100722045	-	aff3	nm_001025108	827	61	594	122	248.325	-0.300799	0.232886	-1.29162	0.19649	0.908406	0.0417198	d	0
chr7_151653463_151653463	chr7	151653463	151653463	+	galntl5	nm_145292	745	61	586	107	234.228	-0.305028	0.236283	-1.29095	0.196722	0.908406	0.0417198	d	0
chr1_3614609_3614609	chr1	3614609	3614609	+	tp73	nm_001204192	1725	43	947	125	330.779	-0.30839	0.238959	-1.29056	0.196857	0.908406	0.0417198	d	0
chr8_143916216_143916216	chr8	143916216	143916216	+	gml	nm_002066	543	32	413	53	142.922	-0.321619	0.249248	-1.29036	0.196927	0.908406	0.0417198	d	0
chr11_3240043_3240043	chr11	3240043	3240043	-	mrgprg	nm_001164377	1344	31	682	98	250.066	-0.319069	0.247448	-1.28944	0.197246	0.908406	0.0417198	d	0
chr1_22469519_22469519	chr1	22469519	22469519	-	wnt4	nm_030761	1160	53	726	128	279.587	-0.300699	0.2333	-1.2889	0.197434	0.908406	0.0417198	d	0
chr11_17410878_17410878	chr11	17410878	17410878	-	kcnj11	nm_001166290	966	43	612	101	229.552	-0.305572	0.237101	-1.28879	0.197472	0.908406	0.0417198	d	0
chr13_36050832_36050832	chr13	36050832	36050832	-	mab21l1	nm_005584	716	52	522	100	212.127	-0.305138	0.236959	-1.28773	0.197841	0.908406	0.0417198	d	0
chr17_72322350_72322350	chr17	72322350	72322350	+	kif19	nm_153209	1307	37	689	110	260.472	-0.314052	0.243928	-1.28748	0.197928	0.908406	0.0417198	d	0
chr15_54055075_54055075	chr15	54055075	54055075	-	wdr72	nr_102334	255	26	220	31	85.5874	-0.340389	0.264802	-1.28545	0.198636	0.908406	0.0417198	d	0
chr19_51587502_51587502	chr19	51587502	51587502	-	klk14	nm_022046	450	18	252	45	100.636	-0.332271	0.258496	-1.2854	0.198652	0.908406	0.0417198	d	0
chrX_71527037_71527037	chrX	71527037	71527037	-	cited1	nm_001144886	700	31	440	71	164.853	-0.314987	0.245056	-1.28537	0.198664	0.908406	0.0417198	d	0
chr2_135476571_135476571	chr2	135476571	135476571	-	tmem163	nm_030923	1719	139	1447	244	545.271	-0.286904	0.22321	-1.28535	0.198669	0.908406	0.0417198	d	0
chr15_41221530_41221530	chr15	41221530	41221530	+	dll4	nm_019074	1842	60	1148	151	390.308	-0.29426	0.228981	-1.28509	0.198762	0.908406	0.0417198	d	0
chr2_152955593_152955593	chr2	152955593	152955593	-	cacnb4	nm_000726	1222	127	1047	216	442.992	-0.291559	0.227135	-1.28364	0.199268	0.909823	0.041043	d	0
chr13_73632929_73632929	chr13	73632929	73632929	+	klf5	nm_001730	316	36	243	58	116.974	-0.325035	0.253228	-1.28357	0.199294	0.909823	0.041043	d	0
chr5_131347607_131347607	chr5	131347607	131347607	-	acsl6	nm_001205251	1477	66	892	168	353.625	-0.295861	0.230706	-1.28242	0.199696	0.910648	0.0406493	d	0
chr20_24180402_24180402	chr20	24180402	24180402	+	flj33581	nr_040102	655	52	477	100	203.289	-0.304286	0.237783	-1.27968	0.200658	0.911253	0.0403609	d	0
chr22_41763336_41763336	chr22	41763336	41763336	+	tef	nm_001145398	553	22	309	57	124.233	-0.324937	0.254051	-1.27902	0.20089	0.911253	0.0403609	d	0
chr15_40398639_40398639	chr15	40398639	40398639	-	bmf	nm_033503	303	15	171	34	73.0772	-0.338381	0.264831	-1.27772	0.201348	0.911253	0.0403609	d	0
chr13_111767623_111767623	chr13	111767623	111767623	+	arhgef7	nm_145735	1405	113	1140	206	444.178	-0.286422	0.224196	-1.27755	0.201408	0.911253	0.0403609	d	0
chr3_86490361_86490361	chr3	86490361	86490361	-	rnu6-69p	nr_046939	131	24	116	27	62.2716	-0.345065	0.270243	-1.27687	0.201649	0.911253	0.0403609	d	0
chr11_130298539_130298539	chr11	130298539	130298539	-	adamts8	nm_007037	2122	128	1513	279	585.88	-0.27776	0.217537	-1.27684	0.201658	0.911253	0.0403609	d	0
chr11_64512329_64512329	chr11	64512329	64512329	-	rasgrp2	nm_001098670	1340	17	638	65	213.829	-0.327214	0.256304	-1.27667	0.20172	0.911253	0.0403609	d	0
chr18_21852196_21852196	chr18	21852196	21852196	-	osbpl1a	nm_018030	145	16	109	20	49.8268	-0.346687	0.271586	-1.27653	0.201769	0.911253	0.0403609	d	0
chr5_76248679_76248679	chr5	76248679	76248679	+	crhbp	nm_001882	1384	76	931	172	363.582	-0.288977	0.226409	-1.27635	0.201832	0.911253	0.0403609	d	0
chr4_4387982_4387982	chr4	4387982	4387982	+	nsg1	nm_001040101	1712	59	1130	139	371.605	-0.290341	0.227659	-1.27533	0.202193	0.911253	0.0403609	d	0
chr19_7698634_7698634	chr19	7698634	7698634	-	pcp2	nm_174895	526	25	314	59	127.071	-0.321131	0.251906	-1.2748	0.202379	0.911253	0.0403609	d	0
chr11_122526397_122526397	chr11	122526397	122526397	+	ubash3b	nm_032873	189	16	131	24	57.101	-0.342966	0.269151	-1.27425	0.202574	0.911253	0.0403609	d	0
chr11_134281812_134281812	chr11	134281812	134281812	-	b3gat1	nm_018644	1672	71	1002	184	392.291	-0.292402	0.229763	-1.27262	0.203151	0.911253	0.0403609	d	0
chr17_48610047_48610047	chr17	48610047	48610047	+	epn3	nm_017957	1453	59	950	139	335.046	-0.2916	0.22917	-1.27242	0.203225	0.911253	0.0403609	d	0
chr3_167967309_167967309	chr3	167967309	167967309	+	egfem1p	nr_021485	547	60	461	95	200.721	-0.3083	0.242338	-1.27219	0.203306	0.911253	0.0403609	d	0
chr1_46598380_46598380	chr1	46598380	46598380	-	pik3r3	nm_003629	109	15	79	19	42.6342	-0.346405	0.272773	-1.26994	0.204107	0.911253	0.0403609	d	0
chr19_3869027_3869027	chr19	3869027	3869027	-	zfr2	nm_015174	1532	61	992	146	350.691	-0.290377	0.228704	-1.26966	0.204204	0.911253	0.0403609	d	0
chr21_44869903_44869903	chr21	44869903	44869903	+	linc00319	nr_026960	665	22	346	64	139.653	-0.32309	0.254509	-1.26947	0.204275	0.911253	0.0403609	d	0
chr5_135170364_135170364	chr5	135170364	135170364	+	slc25a48	nm_145282	1714	87	1097	211	435.767	-0.28531	0.224813	-1.2691	0.204406	0.911253	0.0403609	d	0
chr2_131513863_131513863	chr2	131513863	131513863	+	amer3	nm_001105195	913	49	621	106	235.674	-0.297974	0.234938	-1.26831	0.204687	0.911253	0.0403609	d	0
chr20_25013342_25013342	chr20	25013342	25013342	-	acss1	nm_001252676	863	57	576	126	246.572	-0.296283	0.233667	-1.26797	0.204807	0.911253	0.0403609	d	0
chr7_129414854_129414854	chr7	129414854	129414854	-	mir183	nr_029615	1193	46	694	122	268.172	-0.301266	0.23764	-1.26774	0.20489	0.911253	0.0403609	d	0
chr20_656823_656823	chr20	656823	656823	-	scrt2	nm_033129	1399	73	951	164	359.239	-0.28715	0.226532	-1.26759	0.204943	0.911253	0.0403609	d	0
chr15_89921272_89921272	chr15	89921272	89921272	+	linc00925	nr_015411	2693	131	1730	322	673.948	-0.277646	0.219198	-1.26664	0.205283	0.911253	0.0403609	d	0
chrX_150863729_150863729	chrX	150863729	150863729	+	prrg3	nm_024082	641	25	360	66	143.517	-0.317816	0.251021	-1.26609	0.20548	0.911253	0.0403609	d	0
chr19_40005752_40005752	chr19	40005752	40005752	+	selv	nm_182704	1549	77	1103	165	389.924	-0.284074	0.224493	-1.2654	0.205728	0.911253	0.0403609	d	0
chr6_1312674_1312674	chr6	1312674	1312674	+	foxq1	nm_033260	875	42	572	95	214.792	-0.301075	0.238035	-1.26484	0.205929	0.911253	0.0403609	d	0
chr20_56195632_56195632	chr20	56195632	56195632	-	zbp1	nm_001160418	826	46	538	104	216.851	-0.300131	0.237446	-1.264	0.206231	0.911253	0.0403609	d	0
chr1_64936475_64936475	chr1	64936475	64936475	+	cachd1	nm_020925	294	28	217	46	97.7085	-0.325223	0.257534	-1.26283	0.206649	0.911253	0.0403609	d	0
chr1_151804348_151804348	chr1	151804348	151804348	-	rorc	nm_005060	782	30	454	78	174.626	-0.310352	0.246036	-1.26141	0.207161	0.911253	0.0403609	d	0
chr7_150147961_150147961	chr7	150147961	150147961	+	gimap8	nm_175571	966	62	661	135	272.476	-0.291665	0.231228	-1.26137	0.207174	0.911253	0.0403609	d	0
chr17_37824705_37824705	chr17	37824705	37824705	+	pnmt	nm_002686	1921	58	1038	170	393.242	-0.298546	0.236873	-1.26036	0.20754	0.911253	0.0403609	d	0
chr2_241831455_241831455	chr2	241831455	241831455	-	c2orf54	nm_001282921	559	15	283	46	108.901	-0.328277	0.260773	-1.25886	0.20808	0.911253	0.0403609	d	0
chr9_96717608_96717608	chr9	96717608	96717608	-	barx1	nm_021570	2302	72	1358	195	480.291	-0.288396	0.229183	-1.25836	0.20826	0.911253	0.0403609	d	0
chr10_116418058_116418058	chr10	116418058	116418058	-	ablim1	nm_002313	450	39	350	65	143.94	-0.312237	0.248218	-1.25792	0.208422	0.911253	0.0403609	d	0
chr10_131265453_131265453	chr10	131265453	131265453	+	mgmt	nm_002412	175	15	107	27	54.0152	-0.338949	0.269554	-1.25745	0.208592	0.911253	0.0403609	d	0
chr2_242811885_242811885	chr2	242811885	242811885	+	rtp5	nm_173821	1436	41	817	115	289.184	-0.300365	0.238891	-1.25733	0.208633	0.911253	0.0403609	d	0
chr19_18337285_18337285	chr19	18337285	18337285	-	pde4c	nr_040546	859	32	527	79	190.094	-0.305167	0.242774	-1.257	0.208753	0.911253	0.0403609	d	0
chr5_1445543_1445543	chr5	1445543	1445543	-	slc6a3	nm_001044	2114	73	1354	181	459.678	-0.283268	0.225355	-1.25699	0.208759	0.911253	0.0403609	d	0
chr11_1432381_1432381	chr11	1432381	1432381	+	brsk2	nm_001256630	493	18	304	41	106.822	-0.32179	0.25636	-1.25523	0.209396	0.911253	0.0403609	d	0
chr14_78870073_78870073	chr14	78870073	78870073	+	nrxn3	nm_004796	216	23	152	38	76.0149	-0.330215	0.263097	-1.25511	0.20944	0.911253	0.0403609	d	0
chr12_111126962_111126962	chr12	111126962	111126962	-	hvcn1	nm_032369	442	22	264	51	108.65	-0.320546	0.255576	-1.25421	0.209766	0.911253	0.0403609	d	0
chr1_205012339_205012339	chr1	205012339	205012339	+	cntn2	nm_005076	1962	95	1235	237	489.344	-0.281045	0.224115	-1.25402	0.209835	0.911253	0.0403609	d	0
chr2_7057522_7057522	chr2	7057522	7057522	+	rnf144a	nm_014746	874	55	648	107	242.682	-0.29359	0.234226	-1.25345	0.210043	0.911253	0.0403609	d	0
chr22_17602257_17602257	chr22	17602257	17602257	-	cecr6	nm_001163079	1165	35	725	88	239.757	-0.298869	0.238474	-1.25326	0.210111	0.911253	0.0403609	d	0
chr14_38725575_38725575	chr14	38725575	38725575	-	clec14a	nm_175060	523	26	325	59	129.013	-0.3144	0.250882	-1.25318	0.21014	0.911253	0.0403609	d	0
chr19_7939326_7939326	chr19	7939326	7939326	-	flj22184	nm_001190467	1156	24	647	71	211.071	-0.309122	0.246921	-1.25191	0.210604	0.911253	0.0403609	d	0
chr7_150974231_150974231	chr7	150974231	150974231	-	smarcd3	nm_003078	736	30	436	76	168.445	-0.307774	0.246041	-1.25091	0.210968	0.911253	0.0403609	d	0
chr6_39290330_39290330	chr6	39290330	39290330	-	kcnk16	nm_001135105	1261	69	806	166	331.49	-0.286695	0.229294	-1.25034	0.211175	0.911253	0.0403609	d	0
chr5_1309492_1309492	chr5	1309492	1309492	-	mir4457	nr_039662	440	30	326	52	124.139	-0.314388	0.251638	-1.24936	0.211532	0.911253	0.0403609	d	0
chr6_6320924_6320924	chr6	6320924	6320924	-	f13a1	nm_000129	613	43	403	94	179.721	-0.301141	0.241068	-1.24919	0.211594	0.911253	0.0403609	d	0
chr9_36893528_36893528	chr9	36893528	36893528	-	mir4476	nr_039687	1568	115	1152	242	477.107	-0.274858	0.22015	-1.2485	0.211846	0.911253	0.0403609	d	0
chr5_131347355_131347355	chr5	131347355	131347355	-	acsl6	nm_001009185	1499	63	895	165	350.629	-0.289405	0.231878	-1.24809	0.211998	0.911253	0.0403609	d	0
chr11_66139291_66139291	chr11	66139291	66139291	-	slc29a2	nm_001532	893	49	570	115	233.692	-0.295107	0.236554	-1.24753	0.212205	0.911253	0.0403609	d	0
chr10_60759277_60759277	chr10	60759277	60759277	+	linc00844	nr_108046	158	18	129	21	55.5186	-0.337867	0.27096	-1.24693	0.212424	0.911253	0.0403609	d	0
chr19_36054560_36054560	chr19	36054560	36054560	-	atp4a	nm_000704	809	38	468	99	197.324	-0.302629	0.242994	-1.24542	0.212979	0.911253	0.0403609	d	0
chr11_113346001_113346001	chr11	113346001	113346001	-	drd2	nm_000795	1768	103	1226	232	480.456	-0.275305	0.22111	-1.2451	0.213095	0.911253	0.0403609	d	0
chr20_61885892_61885892	chr20	61885892	61885892	-	nkain4	nm_152864	2023	64	1243	167	425.314	-0.284819	0.22883	-1.24468	0.213251	0.911253	0.0403609	d	0
chr19_18208602_18208602	chr19	18208602	18208602	+	mast3	nm_015016	723	35	474	78	177.736	-0.301689	0.242409	-1.24455	0.213299	0.911253	0.0403609	d	0
chr2_124782863_124782863	chr2	124782863	124782863	+	cntnap5	nm_130773	629	58	502	101	211.17	-0.29697	0.238644	-1.24441	0.21335	0.911253	0.0403609	d	0
chr8_99439249_99439249	chr8	99439249	99439249	+	kcns2	nm_020697	1298	51	761	136	294.932	-0.29315	0.235836	-1.24303	0.213858	0.912003	0.0400038	d	0
chr7_157258924_157258924	chr7	157258924	157258924	+	ac006372.4	nr_110157	1010	51	656	119	254.875	-0.291445	0.234523	-1.24271	0.213974	0.912023	0.0399943	d	0
chr3_42743013_42743013	chr3	42743013	42743013	-	hhatl	nr_027753	778	33	467	83	181.373	-0.302985	0.243966	-1.24191	0.214269	0.912806	0.0396215	d	0
chr20_43935482_43935482	chr20	43935482	43935482	+	rbpjl	nm_014276	672	29	417	69	157.238	-0.305797	0.246449	-1.24081	0.214674	0.913009	0.0395249	d	0
chr14_69951470_69951470	chr14	69951470	69951470	+	plekhd1	nm_001161498	1938	96	1341	218	489.27	-0.274417	0.221341	-1.23979	0.215052	0.913305	0.0393841	d	0
chr22_17602484_17602484	chr22	17602484	17602484	+	loc100996342	nr_103793	1102	30	687	76	219.815	-0.298461	0.240794	-1.23949	0.215165	0.913313	0.0393802	d	0
chr1_35225341_35225341	chr1	35225341	35225341	+	gjb4	nm_153212	614	24	345	64	137.904	-0.312163	0.252023	-1.23863	0.215483	0.913341	0.0393673	d	0
chr13_36050885_36050885	chr13	36050885	36050885	+	nbea	nm_001204197	718	52	526	102	213.542	-0.293162	0.236694	-1.23857	0.215505	0.913341	0.0393673	d	0
chr17_26733230_26733230	chr17	26733230	26733230	-	slc46a1	nm_001242366	260	17	174	30	70.5108	-0.327984	0.264878	-1.23825	0.215624	0.913376	0.0393505	d	0
chr5_6448735_6448735	chr5	6448735	6448735	+	ube2ql1	nm_001145161	1006	90	843	156	335.346	-0.285052	0.230541	-1.23645	0.216291	0.9149	0.0386263	d	0
chr19_3801810_3801810	chr19	3801810	3801810	-	matk	nm_002378	1224	49	807	115	281.021	-0.287208	0.232615	-1.23469	0.216945	0.914961	0.0385973	d	0
chr19_7828034_7828034	chr19	7828034	7828034	+	clec4m	nm_014257	446	28	337	47	120.869	-0.311996	0.252976	-1.2333	0.217463	0.914961	0.0385973	d	0
chr5_139175405_139175405	chr5	139175405	139175405	+	psd2	nm_032289	2196	94	1383	238	520.328	-0.275923	0.223858	-1.23258	0.217732	0.914961	0.0385973	d	0
chr6_108053600_108053600	chr6	108053600	108053600	-	scml4	nm_001286409	907	91	764	157	322.16	-0.285033	0.231323	-1.23219	0.21788	0.914961	0.0385973	d	0
chr11_65816651_65816651	chr11	65816651	65816651	-	gal3st3	nm_033036	623	24	357	63	139.223	-0.309753	0.251396	-1.23213	0.217901	0.914961	0.0385973	d	0
chr20_57393368_57393368	chr20	57393368	57393368	-	mir298	nr_030580	595	20	319	57	126.041	-0.315169	0.255792	-1.23213	0.217901	0.914961	0.0385973	d	0
chr7_45197366_45197366	chr7	45197366	45197366	+	ramp3	nm_005856	1245	54	728	144	295.08	-0.290264	0.235652	-1.23175	0.218042	0.914961	0.0385973	d	0
chr1_221509638_221509638	chr1	221509638	221509638	-	c1orf140	nr_024236	151	17	132	17	52.1807	-0.335414	0.27233	-1.23164	0.218083	0.914961	0.0385973	d	0
chr11_120136641_120136641	chr11	120136641	120136641	-	rp11-778o17.4	nr_038829	1189	92	880	190	371.16	-0.275794	0.224486	-1.22856	0.219237	0.918241	0.0370431	d	0
chr11_3239561_3239561	chr11	3239561	3239561	+	mrgprg-as1	nr_027138	1297	32	673	101	248.076	-0.30314	0.246834	-1.22811	0.219405	0.918241	0.0370431	d	0
chr4_7436700_7436700	chr4	7436700	7436700	-	psapl1	nm_001085382	571	18	310	51	118.158	-0.31508	0.257046	-1.22577	0.220284	0.918241	0.0370431	d	0
chr10_45406763_45406763	chr10	45406763	45406763	+	tmem72	nm_001123376	688	39	470	83	181.727	-0.295223	0.241004	-1.22497	0.220586	0.918241	0.0370431	d	0
chr5_134783038_134783038	chr5	134783038	134783038	-	c5orf20	nm_130848	919	53	562	132	247.684	-0.289223	0.236134	-1.22482	0.220641	0.918241	0.0370431	d	0
chr18_29598444_29598444	chr18	29598444	29598444	+	rnf125	nm_017831	568	50	464	83	185	-0.29728	0.242858	-1.22409	0.220918	0.918241	0.0370431	d	0
chr22_30942669_30942669	chr22	30942669	30942669	-	sec14l6	nm_001193336	814	46	583	94	215.279	-0.289591	0.236832	-1.22277	0.221418	0.918241	0.0370431	d	0
chr19_54785963_54785963	chr19	54785963	54785963	+	mir4752	nr_039907	513	27	379	48	129.157	-0.306868	0.251021	-1.22248	0.221527	0.918241	0.0370431	d	0
chr12_133195365_133195365	chr12	133195365	133195365	+	p2rx2	nm_174873	1486	70	1021	159	366.415	-0.276812	0.226454	-1.22238	0.221565	0.918241	0.0370431	d	0
chr17_73717515_73717515	chr17	73717515	73717515	+	itgb4	nm_000213	1265	43	709	122	271.609	-0.293495	0.240147	-1.22215	0.221652	0.918241	0.0370431	d	0
chr17_78143790_78143790	chr17	78143790	78143790	+	card14	nr_047566	836	60	655	110	247.709	-0.287196	0.235048	-1.22186	0.221759	0.918241	0.0370431	d	0
chr11_68939030_68939030	chr11	68939030	68939030	-	rp11-554a11.8	nr_104161	378	30	258	59	116.385	-0.307422	0.251962	-1.22011	0.222422	0.918241	0.0370431	d	0
chr2_23608297_23608297	chr2	23608297	23608297	+	klhl29	nm_052920	338	18	185	45	85.7708	-0.319389	0.261945	-1.2193	0.222732	0.918241	0.0370431	d	0
chr7_36134919_36134919	chr7	36134919	36134919	+	loc101928618	nr_108089	266	25	179	47	88.9205	-0.315529	0.258856	-1.21893	0.222869	0.918241	0.0370431	d	0
chr4_6565327_6565327	chr4	6565327	6565327	-	ppp2r2c	nm_001206994	1258	52	780	132	292.778	-0.284567	0.233642	-1.21796	0.223239	0.918241	0.0370431	d	0
chr6_126070731_126070731	chr6	126070731	126070731	+	hey2	nm_012259	1185	89	921	173	363.041	-0.275543	0.226262	-1.2178	0.223298	0.918241	0.0370431	d	0
chr1_202679551_202679551	chr1	202679551	202679551	-	syt2	nm_177402	2132	100	1483	229	527.156	-0.268122	0.220223	-1.2175	0.223414	0.918241	0.0370431	d	0
chr21_30257695_30257695	chr21	30257695	30257695	-	n6amt1	nm_182749	154	18	149	15	54.2228	-0.332243	0.272905	-1.21743	0.22344	0.918241	0.0370431	d	0
chr2_160919126_160919126	chr2	160919126	160919126	-	pla2r1	nm_001007267	275	18	177	35	75.4691	-0.32001	0.2632	-1.21585	0.224044	0.918241	0.0370431	d	0
chr8_99954799_99954799	chr8	99954799	99954799	-	stk3	nm_001256312	1048	47	649	118	251.978	-0.287133	0.236215	-1.21556	0.224154	0.918241	0.0370431	d	0
chr5_1009076_1009076	chr5	1009076	1009076	+	nkd2	nm_033120	1886	47	990	147	362.358	-0.293061	0.241096	-1.21553	0.224162	0.918241	0.0370431	d	0
chr1_206730491_206730491	chr1	206730491	206730491	+	rassf5	nm_182665	718	46	500	97	201.667	-0.289273	0.238033	-1.21526	0.224266	0.918241	0.0370431	d	0
chr12_52914243_52914243	chr12	52914243	52914243	-	krt5	nm_000424	618	30	355	78	152.782	-0.302099	0.24861	-1.21515	0.224307	0.918241	0.0370431	d	0
chr12_71833549_71833549	chr12	71833549	71833549	+	lgr5	nm_001277227	1403	100	1054	206	420.607	-0.270271	0.22255	-1.21443	0.224585	0.918241	0.0370431	d	0
chr19_54824409_54824409	chr19	54824409	54824409	-	lilra5	nm_021250	365	23	272	38	98.4804	-0.313202	0.257999	-1.21396	0.224762	0.918241	0.0370431	d	0
chr17_74068607_74068607	chr17	74068607	74068607	-	srp68	nm_014230	573	16	394	32	114.589	-0.309939	0.255327	-1.21389	0.224789	0.918241	0.0370431	d	0
chr15_99551024_99551024	chr15	99551024	99551024	-	pgpep1l	nm_001167902	327	18	231	31	82.5547	-0.317847	0.26189	-1.21367	0.224875	0.918241	0.0370431	d	0
chr2_241737229_241737229	chr2	241737229	241737229	-	kif1a	nm_004321	1852	84	1154	215	449.994	-0.274627	0.226293	-1.21359	0.224905	0.918241	0.0370431	d	0
chr11_66314311_66314311	chr11	66314311	66314311	+	actn3	nm_001104	596	22	333	60	131.149	-0.3077	0.253613	-1.21327	0.225027	0.918241	0.0370431	d	0
chr20_58296264_58296264	chr20	58296264	58296264	+	phactr3	nm_183244	246	15	173	24	64.1305	-0.323657	0.267271	-1.21097	0.225908	0.918241	0.0370431	d	0
chr1_27240567_27240567	chr1	27240567	27240567	-	nr0b2	nm_021969	453	28	354	45	122.009	-0.307117	0.253638	-1.21085	0.225954	0.918241	0.0370431	d	0
chr21_46829980_46829980	chr21	46829980	46829980	-	col18a1-as2	nr_052004	505	16	296	41	104.643	-0.312134	0.258011	-1.20977	0.226367	0.918241	0.0370431	d	0
chr16_87970112_87970112	chr16	87970112	87970112	-	ca5a	nm_001739	379	23	296	35	100.342	-0.312919	0.258782	-1.2092	0.226587	0.918241	0.0370431	d	0
chr9_88356944_88356944	chr9	88356944	88356944	-	agtpbp1	nm_015239	357	27	273	44	105.536	-0.309756	0.256351	-1.20833	0.226921	0.918241	0.0370431	d	0
chr1_38261159_38261159	chr1	38261159	38261159	+	maneal	nm_152496	732	28	443	71	164.02	-0.297833	0.246562	-1.20795	0.227068	0.918241	0.0370431	d	0
chr6_167704802_167704802	chr6	167704802	167704802	+	unc93a	nm_018974	230	26	206	31	82.3526	-0.321082	0.265814	-1.20792	0.227078	0.918241	0.0370431	d	0
chr17_36762183_36762183	chr17	36762183	36762183	-	srcin1	nm_025248	1631	71	1100	167	389.831	-0.272773	0.225833	-1.20785	0.227104	0.918241	0.0370431	d	0
chr20_60942368_60942368	chr20	60942368	60942368	-	lama5	nm_005560	1231	21	677	67	214.246	-0.300811	0.24906	-1.20779	0.227129	0.918241	0.0370431	d	0
chr19_47137939_47137939	chr19	47137939	47137939	-	gng8	nm_033258	470	22	316	45	112.722	-0.306414	0.253957	-1.20656	0.227602	0.918241	0.0370431	d	0
chr5_175085039_175085039	chr5	175085039	175085039	+	hrh2	nm_001131055	597	27	391	60	142.405	-0.298921	0.248196	-1.20437	0.228445	0.918241	0.0370431	d	0
chr19_17137625_17137625	chr19	17137625	17137625	-	cpamd8	nm_015692	1612	79	1086	186	405.476	-0.270761	0.224935	-1.20373	0.228693	0.918241	0.0370431	d	0
chr3_10547268_10547268	chr3	10547268	10547268	-	atp2b2	nm_001683	1620	44	894	131	321.639	-0.288467	0.239667	-1.20362	0.228738	0.918241	0.0370431	d	0
chr19_49016446_49016446	chr19	49016446	49016446	-	lmtk3	nm_001080434	1158	82	854	171	345.551	-0.271833	0.22595	-1.20307	0.228951	0.918241	0.0370431	d	0
chr16_67465035_67465035	chr16	67465035	67465035	+	hsd11b2	nm_000196	886	39	531	101	211.149	-0.289712	0.241009	-1.20208	0.229334	0.918241	0.0370431	d	0
chr14_93389444_93389444	chr14	93389444	93389444	+	chga	nm_001275	1447	77	980	179	377.323	-0.271732	0.226131	-1.20166	0.229495	0.918241	0.0370431	d	0
chr16_62070739_62070739	chr16	62070739	62070739	-	cdh8	nm_001796	1368	77	958	172	365.87	-0.271144	0.225646	-1.20163	0.229506	0.918241	0.0370431	d	0
chr16_68482409_68482409	chr16	68482409	68482409	-	smpd3	nm_018667	727	29	453	71	165.713	-0.294954	0.24554	-1.20125	0.229655	0.918241	0.0370431	d	0
chr19_54784738_54784738	chr19	54784738	54784738	-	lilrb2	nm_001278403	460	22	336	39	110.942	-0.306282	0.255074	-1.20076	0.229846	0.918241	0.0370431	d	0
chr5_131347761_131347761	chr5	131347761	131347761	-	acsl6	nm_001205250	1450	65	892	168	350.225	-0.277099	0.230789	-1.20066	0.229885	0.918241	0.0370431	d	0
chr9_138235094_138235094	chr9	138235094	138235094	+	c9orf62	nm_173520	1289	35	692	107	255.476	-0.293613	0.244556	-1.20059	0.229908	0.918241	0.0370431	d	0
chr11_193079_193079	chr11	193079	193079	+	scgb1c1	nm_145651	1683	62	957	175	374.163	-0.28153	0.234494	-1.20058	0.229913	0.918241	0.0370431	d	0
chr3_50264119_50264119	chr3	50264119	50264119	+	gnai2	nm_001282620	325	15	210	30	76.438	-0.316219	0.263494	-1.2001	0.2301	0.918241	0.0370431	d	0
chr14_100626012_100626012	chr14	100626012	100626012	-	degs2	nm_206918	1312	47	822	120	289.236	-0.280824	0.234208	-1.19904	0.230514	0.918241	0.0370431	d	0
chr19_7767032_7767032	chr19	7767032	7767032	-	fcer2	nm_002002	610	36	423	75	164.05	-0.291771	0.243469	-1.19839	0.230764	0.918241	0.0370431	d	0
chr22_17602213_17602213	chr22	17602213	17602213	-	cecr6	nm_031890	1175	35	735	90	242.34	-0.285826	0.238523	-1.19832	0.230794	0.918241	0.0370431	d	0
chr11_101454659_101454659	chr11	101454659	101454659	-	trpc6	nm_004621	898	70	657	145	280.968	-0.275229	0.229972	-1.19679	0.231387	0.918241	0.0370431	d	0
chr11_60635014_60635014	chr11	60635014	60635014	+	zp1	nm_207341	790	32	417	94	181.739	-0.297607	0.248946	-1.19547	0.231904	0.918241	0.0370431	d	0
chr3_52811601_52811601	chr3	52811601	52811601	+	itih1	nm_002215	1038	60	693	139	280.429	-0.277043	0.231748	-1.19545	0.231911	0.918241	0.0370431	d	0
chr20_57392749_57392749	chr20	57392749	57392749	-	mir296	nr_029844	631	21	330	63	133.842	-0.305547	0.255684	-1.19502	0.23208	0.918241	0.0370431	d	0
chr18_5197255_5197255	chr18	5197255	5197255	-	c18orf42	nm_001145194	699	56	536	106	219.59	-0.282695	0.236642	-1.19461	0.23224	0.918241	0.0370431	d	0
chr19_18197813_18197813	chr19	18197813	18197813	-	il12rb1	nm_001290023	236	18	180	26	68.5128	-0.318351	0.266625	-1.194	0.232478	0.918241	0.0370431	d	0
chr20_61448413_61448413	chr20	61448413	61448413	+	col9a3	nm_001853	1155	16	605	57	191.198	-0.303299	0.254453	-1.19196	0.233275	0.918241	0.0370431	d	0
chr18_60986613_60986613	chr18	60986613	60986613	-	bcl2	nm_000657	348	24	250	43	98.6811	-0.306351	0.257025	-1.19191	0.233297	0.918241	0.0370431	d	0
chr20_590910_590910	chr20	590910	590910	-	tcf15	nm_004609	2080	97	1324	246	513.133	-0.266501	0.223657	-1.19156	0.233433	0.918241	0.0370431	d	0
chr7_50344377_50344377	chr7	50344377	50344377	+	ikzf1	nm_006060	1597	109	1215	225	469.892	-0.263141	0.220912	-1.19116	0.233592	0.918241	0.0370431	d	0
chr20_23030301_23030301	chr20	23030301	23030301	-	thbd	nm_000361	1530	57	1069	129	344.646	-0.271532	0.228062	-1.19061	0.233807	0.918241	0.0370431	d	0
chr7_106685177_106685177	chr7	106685177	106685177	+	prkar2b	nm_002736	268	22	208	33	81.5979	-0.312952	0.26296	-1.19012	0.234001	0.918241	0.0370431	d	0
chr22_38851205_38851205	chr22	38851205	38851205	-	kcnj4	nm_152868	2031	80	1274	207	466.358	-0.26914	0.226213	-1.18976	0.23414	0.918241	0.0370431	d	0
chr22_37505449_37505449	chr22	37505449	37505449	-	tmprss6	nm_001289001	898	39	507	108	213.194	-0.289265	0.24318	-1.18951	0.23424	0.918241	0.0370431	d	0
chr11_64511630_64511630	chr11	64511630	64511630	-	rasgrp2	nm_001098671	1531	23	752	85	255.557	-0.300297	0.252466	-1.18945	0.234261	0.918241	0.0370431	d	0
chr19_52005043_52005043	chr19	52005043	52005043	-	siglec12	nm_053003	370	23	256	44	100.205	-0.304865	0.256446	-1.18881	0.234516	0.918241	0.0370431	d	0
chr15_45406359_45406359	chr15	45406359	45406359	-	duox2	nm_014080	2481	126	1692	300	637.47	-0.258996	0.218033	-1.18788	0.234882	0.918241	0.0370431	d	0
chr12_5541279_5541279	chr12	5541279	5541279	+	ntf3	nm_001102654	472	20	305	44	109.023	-0.303101	0.255229	-1.18757	0.235004	0.918241	0.0370431	d	0
chr20_59053168_59053168	chr20	59053168	59053168	+	mir4533	nr_039758	478	35	347	67	141.943	-0.293346	0.247116	-1.18708	0.235197	0.918241	0.0370431	d	0
chr14_95107061_95107061	chr14	95107061	95107061	+	serpina13p	nr_015340	213	17	140	31	64.2129	-0.316005	0.266512	-1.18571	0.235737	0.918241	0.0370431	d	0
chr15_51633712_51633712	chr15	51633712	51633712	+	gldn	nm_181789	985	76	708	163	307.919	-0.270315	0.228	-1.18559	0.235783	0.918241	0.0370431	d	0
chr1_6094347_6094347	chr1	6094347	6094347	+	kcnab2	nm_001199860	669	35	408	87	171.707	-0.289714	0.244487	-1.18499	0.236021	0.918241	0.0370431	d	0
chr21_35552977_35552977	chr21	35552977	35552977	+	linc00310	nr_027267	366	38	268	71	131.516	-0.294723	0.248758	-1.18478	0.236105	0.918241	0.0370431	d	0
chr16_48180681_48180681	chr16	48180681	48180681	-	abcc12	nm_033226	160	22	144	25	63.6949	-0.319556	0.269968	-1.18368	0.236538	0.918241	0.0370431	d	0
chr11_62186506_62186506	chr11	62186506	62186506	+	scgb1a1	nm_003357	189	16	144	22	57.3284	-0.319178	0.269711	-1.18341	0.236647	0.918241	0.0370431	d	0
chr10_135150475_135150475	chr10	135150475	135150475	-	caly	nm_015722	1311	37	790	101	265.522	-0.282219	0.238573	-1.18295	0.23683	0.918241	0.0370431	d	0
chr11_44331716_44331716	chr11	44331716	44331716	-	alx4	nm_021926	1578	60	1032	148	357.565	-0.270498	0.228792	-1.18229	0.237092	0.918241	0.0370431	d	0
chr4_100242599_100242599	chr4	100242599	100242599	-	adh1b	nm_001286650	80	16	72	16	39.5531	-0.322975	0.273232	-1.18205	0.237184	0.918241	0.0370431	d	0
chr19_2702746_2702746	chr19	2702746	2702746	-	gng7	nm_052847	814	54	634	101	232.686	-0.279072	0.236149	-1.18176	0.237301	0.918241	0.0370431	d	0
chr1_19991779_19991779	chr1	19991779	19991779	+	htr6	nm_000871	1545	65	1027	157	364.666	-0.268581	0.227607	-1.18002	0.237992	0.918241	0.0370431	d	0
chr11_108464374_108464374	chr11	108464374	108464374	-	exph5	nm_015065	688	64	546	118	234.802	-0.277743	0.235386	-1.17994	0.238022	0.918241	0.0370431	d	0
chr5_169532916_169532916	chr5	169532916	169532916	+	foxi1	nm_144769	256	15	158	31	66.7984	-0.313616	0.266022	-1.17891	0.238433	0.918241	0.0370431	d	0
chr1_211666259_211666259	chr1	211666259	211666259	-	rd3	nm_183059	1287	59	813	149	314.257	-0.273045	0.231619	-1.17885	0.238456	0.918241	0.0370431	d	0
chrX_75005079_75005079	chrX	75005079	75005079	-	magee2	nm_138703	139	15	99	22	48.1531	-0.319936	0.271489	-1.17845	0.238618	0.918241	0.0370431	d	0
chr14_91282761_91282761	chr14	91282761	91282761	-	ttc7b	nm_001010854	432	17	234	47	97.2976	-0.306782	0.260379	-1.17822	0.238711	0.918241	0.0370431	d	0
chrX_9754495_9754495	chrX	9754495	9754495	+	shroom2	nm_001649	793	49	600	95	219.193	-0.27905	0.236861	-1.17812	0.23875	0.918241	0.0370431	d	0
chr10_102090243_102090243	chr10	102090243	102090243	-	pkd2l1	nm_016112	1603	106	1135	239	466.07	-0.260488	0.221105	-1.17812	0.238751	0.918241	0.0370431	d	0
chr14_104583840_104583840	chr14	104583840	104583840	-	mir3545	nr_039859	1588	38	870	117	303.285	-0.284909	0.241916	-1.17772	0.238909	0.918241	0.0370431	d	0
chr3_12200851_12200851	chr3	12200851	12200851	-	timp4	nm_003256	251	15	158	30	65.9427	-0.313489	0.266222	-1.17755	0.238977	0.918241	0.0370431	d	0
chr16_84075762_84075762	chr16	84075762	84075762	-	slc38a8	nm_001080442	1251	41	708	118	266.134	-0.283198	0.240682	-1.17665	0.239336	0.918241	0.0370431	d	0
chr17_45056614_45056614	chr17	45056614	45056614	-	rprml	nm_203400	1547	95	1196	192	432.128	-0.26218	0.222977	-1.17582	0.239667	0.918241	0.0370431	d	0
chr8_41522804_41522804	chr8	41522804	41522804	-	ank1	nm_001142445	438	20	282	44	104.279	-0.301024	0.256168	-1.17511	0.239953	0.918241	0.0370431	d	0
chr22_43912133_43912133	chr22	43912133	43912133	+	efcab6-as1	nr_046563	504	19	291	50	111.874	-0.301245	0.256368	-1.17505	0.239974	0.918241	0.0370431	d	0
chr13_70681344_70681344	chr13	70681344	70681344	+	atxn8os	nr_002717	234	15	136	33	64.0137	-0.313712	0.266986	-1.17501	0.23999	0.918241	0.0370431	d	0
chr19_50936159_50936159	chr19	50936159	50936159	+	mybpc2	nm_004533	1265	30	751	85	242.603	-0.284119	0.241874	-1.17466	0.240132	0.918241	0.0370431	d	0
chr20_25038818_25038818	chr20	25038818	25038818	-	acss1	nm_001252677	1081	48	675	122	259.939	-0.276745	0.235675	-1.17426	0.240289	0.918241	0.0370431	d	0
chr15_45406522_45406522	chr15	45406522	45406522	+	duoxa2	nm_207581	2527	127	1719	305	647.018	-0.255982	0.218031	-1.17406	0.24037	0.918241	0.0370431	d	0
chr8_144241457_144241457	chr8	144241457	144241457	-	ly6h	nm_002347	1396	46	821	128	298.316	-0.277902	0.236969	-1.17274	0.240902	0.918241	0.0370431	d	0
chr18_49866541_49866541	chr18	49866541	49866541	+	dcc	nm_005215	994	58	728	121	269.336	-0.271514	0.23157	-1.17249	0.240999	0.918241	0.0370431	d	0
chr9_1050345_1050345	chr9	1050345	1050345	+	dmrt2	nm_006557	1222	63	842	144	314.179	-0.268667	0.229191	-1.17224	0.241099	0.918241	0.0370431	d	0
chr9_1050353_1050353	chr9	1050353	1050353	+	dmrt2	nm_001130865	1222	63	842	144	314.179	-0.268667	0.229191	-1.17224	0.241099	0.918241	0.0370431	d	0
chr5_118788137_118788137	chr5	118788137	118788137	+	hsd17b4	nm_000414	172	15	119	24	53.461	-0.316444	0.269973	-1.17213	0.241145	0.918241	0.0370431	d	0
chr16_25703346_25703346	chr16	25703346	25703346	+	hs3st4	nm_006040	1372	80	1051	162	373.442	-0.264271	0.225506	-1.1719	0.241237	0.918241	0.0370431	d	0
chr2_213403352_213403352	chr2	213403352	213403352	-	erbb4	nm_001042599	1084	50	642	134	265.186	-0.277878	0.237241	-1.17129	0.241482	0.918241	0.0370431	d	0
chr4_4228621_4228621	chr4	4228621	4228621	-	otop1	nm_177998	957	39	762	69	222.514	-0.280832	0.239822	-1.171	0.241597	0.918241	0.0370431	d	0
chr16_58005020_58005020	chr16	58005020	58005020	-	cngb1	nm_001297	1306	59	850	145	317.202	-0.269919	0.230549	-1.17077	0.241693	0.918241	0.0370431	d	0
chr7_30722141_30722141	chr7	30722141	30722141	-	crhr2	nm_001883	2240	109	1486	268	564.796	-0.25834	0.220713	-1.17048	0.241808	0.918241	0.0370431	d	0
chr12_132690573_132690573	chr12	132690573	132690573	-	galnt9	nm_021808	1627	37	892	115	306.215	-0.283226	0.242127	-1.16974	0.242105	0.918241	0.0370431	d	0
chr8_69242956_69242956	chr8	69242956	69242956	+	c8orf34	nm_052958	505	34	326	77	145.592	-0.28868	0.246872	-1.16935	0.242263	0.918241	0.0370431	d	0
chr2_46588_46588	chr2	46588	46588	-	fam110c	nm_001077710	1068	59	834	113	282.139	-0.271271	0.232188	-1.16833	0.242676	0.918241	0.0370431	d	0
chr16_23847299_23847299	chr16	23847299	23847299	+	prkcb	nm_002738	1183	59	770	144	299.865	-0.270212	0.231337	-1.16804	0.242789	0.918241	0.0370431	d	0
chr19_54785033_54785033	chr19	54785033	54785033	-	lilrb2	nm_001080978	473	24	351	43	117.557	-0.296022	0.253485	-1.1678	0.242886	0.918241	0.0370431	d	0
chr19_39786964_39786964	chr19	39786964	39786964	+	ifnl1	nm_172140	819	53	604	108	232.42	-0.274078	0.234772	-1.16742	0.243042	0.918241	0.0370431	d	0
chr1_223566714_223566714	chr1	223566714	223566714	+	c1orf65	nm_152610	1040	61	713	139	283.558	-0.269607	0.230969	-1.16729	0.243095	0.918241	0.0370431	d	0
chr12_113495661_113495661	chr12	113495661	113495661	+	dtx1	nm_004416	1627	93	1179	205	440.53	-0.259112	0.222017	-1.16708	0.243177	0.918241	0.0370431	d	0
chr22_45064426_45064426	chr22	45064426	45064426	+	prr5	nm_001017529	767	29	446	79	171.949	-0.288205	0.247068	-1.1665	0.243412	0.918362	0.0369863	d	0
chr1_17634689_17634689	chr1	17634689	17634689	+	padi4	nm_012387	1243	80	882	178	355.562	-0.263204	0.225737	-1.16597	0.243625	0.918423	0.0369571	d	0
chr17_8702667_8702667	chr17	8702667	8702667	-	mfsd6l	nm_152599	1204	43	701	120	265.09	-0.278684	0.239119	-1.16546	0.243832	0.918657	0.0368467	d	0
chr17_48638428_48638428	chr17	48638428	48638428	+	cacna1g	nm_001256361	1252	26	673	84	229.408	-0.289085	0.248143	-1.16499	0.244022	0.918657	0.0368467	d	0
chr5_142150291_142150291	chr5	142150291	142150291	+	arhgap26	nm_015071	243	23	190	35	80.1442	-0.305854	0.262962	-1.16311	0.244784	0.920467	0.0359915	d	0
chr17_71640227_71640227	chr17	71640227	71640227	-	sdk2	nm_001144952	1699	63	1082	162	381.685	-0.266043	0.228963	-1.16195	0.245257	0.921339	0.0355805	d	0
chr8_144241755_144241755	chr8	144241755	144241755	-	ly6h	nm_001135655	1342	47	818	126	294.021	-0.273504	0.235449	-1.16162	0.245388	0.921339	0.0355805	d	0
chr2_177028804_177028804	chr2	177028804	177028804	+	hoxd3	nm_006898	905	42	570	105	221.563	-0.277069	0.238554	-1.16145	0.245457	0.921339	0.0355805	d	0
chr1_22890003_22890003	chr1	22890003	22890003	+	epha8	nm_020526	2151	92	1298	249	511.826	-0.263514	0.227043	-1.16063	0.24579	0.921339	0.0355805	d	0
chr15_40600174_40600174	chr15	40600174	40600174	-	plcb2	nm_004573	705	35	450	84	176.91	-0.282332	0.243405	-1.15993	0.246079	0.921339	0.0355805	d	0
chr4_5891953_5891953	chr4	5891953	5891953	-	crmp1	nm_001288661	2332	70	1384	197	483.432	-0.266197	0.230147	-1.15664	0.24742	0.923316	0.0346496	d	0
chr16_58498725_58498725	chr16	58498725	58498725	+	ndrg4	nm_022910	1845	52	1162	138	376.09	-0.266917	0.230958	-1.1557	0.247805	0.923316	0.0346496	d	0
chr1_53099065_53099065	chr1	53099065	53099065	+	fam159a	nm_001042693	937	56	639	128	257.707	-0.269321	0.233048	-1.15565	0.247826	0.923316	0.0346496	d	0
chr9_115653193_115653193	chr9	115653193	115653193	-	slc46a2	nm_033051	316	16	233	26	77.1303	-0.304946	0.264003	-1.15509	0.248055	0.923316	0.0346496	d	0
chr21_33245627_33245627	chr21	33245627	33245627	+	hunk	nm_014586	1336	72	940	163	351.527	-0.261457	0.226589	-1.15388	0.248549	0.923316	0.0346496	d	0
chr16_28518155_28518155	chr16	28518155	28518155	-	il27	nm_145659	1017	44	659	108	242.151	-0.272523	0.236222	-1.15367	0.248634	0.923316	0.0346496	d	0
chr14_102022013_102022013	chr14	102022013	102022013	-	dio3os	nr_002770	1223	44	691	127	270.143	-0.277153	0.240318	-1.15328	0.248797	0.923316	0.0346496	d	0
chr20_2517252_2517252	chr20	2517252	2517252	+	tmc2	nm_080751	1370	67	856	173	345.353	-0.265767	0.230478	-1.15311	0.248864	0.923316	0.0346496	d	0
chr2_220413869_220413869	chr2	220413869	220413869	-	mir3132	nr_036082	292	17	195	33	76.278	-0.30322	0.263153	-1.15226	0.249215	0.923316	0.0346496	d	0
chr9_100935174_100935174	chr9	100935174	100935174	-	coro2a	nm_003389	624	25	369	66	142.932	-0.288272	0.250375	-1.15136	0.249582	0.923316	0.0346496	d	0
chr22_30116343_30116343	chr22	30116343	30116343	+	cabp7	nm_182527	1553	41	904	119	308.006	-0.27418	0.238334	-1.1504	0.249978	0.923316	0.0346496	d	0
chr19_45826235_45826235	chr19	45826235	45826235	-	ckm	nm_001824	689	20	436	50	140.644	-0.288163	0.250586	-1.14996	0.250162	0.923316	0.0346496	d	0
chr2_136875725_136875725	chr2	136875725	136875725	-	cxcr4	nm_003467	1607	127	1366	233	509.516	-0.256576	0.223196	-1.14955	0.250327	0.923316	0.0346496	d	0
chr11_61276067_61276067	chr11	61276067	61276067	+	mir4488	nr_039708	1702	63	1058	167	382.099	-0.264521	0.230163	-1.14928	0.250441	0.923316	0.0346496	d	0
chr4_3768295_3768295	chr4	3768295	3768295	+	adra2c	nm_000683	691	16	352	54	130.399	-0.297385	0.259044	-1.14801	0.250966	0.923316	0.0346496	d	0
chr1_55505148_55505148	chr1	55505148	55505148	+	pcsk9	nm_174936	1399	95	1077	195	411.188	-0.256364	0.223332	-1.1479	0.251008	0.923316	0.0346496	d	0
chr16_84402132_84402132	chr16	84402132	84402132	+	atp2c2	nm_014861	1795	122	1394	252	529.588	-0.251656	0.219348	-1.14729	0.25126	0.923316	0.0346496	d	0
chr1_84767288_84767288	chr1	84767288	84767288	+	samd13	nm_001134663	273	32	232	47	102.673	-0.296567	0.258522	-1.14716	0.251314	0.923316	0.0346496	d	0
chr22_37505603_37505603	chr22	37505603	37505603	-	tmprss6	nm_001289000	914	39	523	109	216.33	-0.278403	0.242858	-1.14636	0.251645	0.923316	0.0346496	d	0
chr9_140772240_140772240	chr9	140772240	140772240	+	cacna1b	nm_001243812	948	22	527	68	180.044	-0.287034	0.250445	-1.1461	0.251755	0.923316	0.0346496	d	0
chr7_87936228_87936228	chr7	87936228	87936228	-	steap4	nm_001205316	270	18	190	32	74.8408	-0.301928	0.263655	-1.14516	0.252141	0.923316	0.0346496	d	0
chr1_20306152_20306152	chr1	20306152	20306152	-	pla2g2a	nm_001161729	1113	89	879	175	354.484	-0.259555	0.226657	-1.14514	0.252149	0.923316	0.0346496	d	0
chr9_97402531_97402531	chr9	97402531	97402531	-	fbp1	nm_001127628	558	27	342	67	138.161	-0.286119	0.249873	-1.14506	0.252186	0.923316	0.0346496	d	0
chr1_53925071_53925071	chr1	53925071	53925071	+	dmrtb1	nm_033067	640	30	404	73	156.561	-0.282277	0.24654	-1.14495	0.252229	0.923316	0.0346496	d	0
chr8_144790279_144790279	chr8	144790279	144790279	-	ccdc166	nm_001162914	985	28	594	77	200.285	-0.279546	0.244249	-1.14451	0.25241	0.923316	0.0346496	d	0
chr4_5894810_5894810	chr4	5894810	5894810	-	crmp1	nm_001014809	2143	82	1310	222	487.761	-0.260335	0.227501	-1.14432	0.25249	0.923316	0.0346496	d	0
chr16_4292081_4292081	chr16	4292081	4292081	-	srl	nm_001098814	546	26	376	55	133.5	-0.285479	0.249483	-1.14428	0.252508	0.923316	0.0346496	d	0
chr14_21493185_21493185	chr14	21493185	21493185	-	ndrg2	nm_001282214	1577	85	1075	202	416.286	-0.256852	0.224525	-1.14398	0.252633	0.923316	0.0346496	d	0
chr2_233243347_233243347	chr2	233243347	233243347	+	alpp	nm_001632	704	19	391	57	139.876	-0.290992	0.254434	-1.14368	0.252755	0.923316	0.0346496	d	0
chr4_77819002_77819002	chr4	77819002	77819002	-	sowahb	nm_001029870	1007	53	761	107	260.8	-0.266423	0.232977	-1.14356	0.252807	0.923316	0.0346496	d	0
chr1_6484847_6484847	chr1	6484847	6484847	+	espn	nm_031475	1677	43	943	130	328.826	-0.273675	0.239378	-1.14327	0.252924	0.923316	0.0346496	d	0
chr1_55464616_55464616	chr1	55464616	55464616	+	bsnd	nm_057176	910	49	590	119	238.616	-0.270002	0.236222	-1.143	0.253037	0.923316	0.0346496	d	0
chr7_150973820_150973820	chr7	150973820	150973820	-	smarcd3	nm_001003802	663	23	382	64	143.854	-0.287253	0.251596	-1.14172	0.253569	0.923316	0.0346496	d	0
chr7_38671167_38671167	chr7	38671167	38671167	-	amph	nm_001635	604	36	392	84	164.94	-0.278784	0.244192	-1.14166	0.253595	0.923316	0.0346496	d	0
chr11_67383135_67383135	chr11	67383135	67383135	-	doc2gp	nr_033791	1013	46	678	109	246.386	-0.268395	0.235263	-1.14083	0.253941	0.923316	0.0346496	d	0
chr14_93215047_93215047	chr14	93215047	93215047	-	lgmn	nm_005606	331	27	253	46	102.603	-0.292405	0.256516	-1.13991	0.254323	0.923316	0.0346496	d	0
chr11_64512928_64512928	chr11	64512928	64512928	-	rasgrp2	nm_153819	1178	15	564	62	190.518	-0.294927	0.259031	-1.13858	0.254879	0.923316	0.0346496	d	0
chr2_6072818_6072818	chr2	6072818	6072818	+	linc01105	nr_026832	533	50	419	92	182.332	-0.274606	0.241399	-1.13756	0.255304	0.923316	0.0346496	d	0
chr17_19620043_19620043	chr17	19620043	19620043	-	slc47a2	nm_001256663	589	16	280	56	116.809	-0.298013	0.262016	-1.13739	0.255377	0.923316	0.0346496	d	0
chr5_132948223_132948223	chr5	132948223	132948223	-	fstl4	nm_015082	1702	109	1267	237	488.319	-0.25014	0.220014	-1.13693	0.25557	0.923316	0.0346496	d	0
chr9_37034476_37034476	chr9	37034476	37034476	-	pax5	nr_103999	2164	116	1566	263	571.949	-0.248032	0.218321	-1.13609	0.255919	0.923316	0.0346496	d	0
chr16_57662137_57662137	chr16	57662137	57662137	+	gpr56	nm_001145771	317	15	219	28	75.6721	-0.299255	0.263824	-1.1343	0.256671	0.923316	0.0346496	d	0
chr9_34628011_34628011	chr9	34628011	34628011	-	arid3c	nm_001017363	2040	118	1488	265	558.512	-0.247456	0.218355	-1.13327	0.257101	0.923316	0.0346496	d	0
chr14_77737655_77737655	chr14	77737655	77737655	-	ngb	nm_021257	1237	56	834	134	301.594	-0.261542	0.230853	-1.13294	0.257239	0.923316	0.0346496	d	0
chr19_57352269_57352269	chr19	57352269	57352269	+	mimt1	nr_024059	262	19	199	30	75.2992	-0.299382	0.264281	-1.13281	0.257292	0.923316	0.0346496	d	0
chr22_27013991_27013991	chr22	27013991	27013991	-	crybb1	nm_001887	385	26	290	46	108.955	-0.288778	0.254931	-1.13277	0.257313	0.923316	0.0346496	d	0
chr16_89238162_89238162	chr16	89238162	89238162	+	cdh15	nm_004933	690	22	466	50	145.787	-0.2817	0.248722	-1.13259	0.257387	0.923316	0.0346496	d	0
chr5_180076624_180076624	chr5	180076624	180076624	-	flt4	nm_182925	1462	66	1049	148	357.044	-0.256584	0.226598	-1.13233	0.257495	0.923316	0.0346496	d	0
chr13_53602875_53602875	chr13	53602875	53602875	+	olfm4	nm_006418	201	20	147	33	68.434	-0.300668	0.265567	-1.13217	0.257562	0.923316	0.0346496	d	0
chr9_95736717_95736717	chr9	95736717	95736717	+	fgd3	nm_033086	516	23	330	54	122.948	-0.285707	0.252391	-1.132	0.257634	0.923316	0.0346496	d	0
chr7_140774031_140774031	chr7	140774031	140774031	+	tmem178b	nm_001195278	1027	54	699	126	266.835	-0.263275	0.232874	-1.13055	0.258246	0.923316	0.0346496	d	0
chr12_57871728_57871728	chr12	57871728	57871728	-	arhgap9	nm_001080156	1390	56	905	141	323.281	-0.260942	0.230865	-1.13028	0.25836	0.923316	0.0346496	d	0
chr16_1020984_1020984	chr16	1020984	1020984	-	lmf1	nm_022773	698	18	405	52	137.124	-0.286682	0.253866	-1.12927	0.258785	0.923316	0.0346496	d	0
chr7_100808852_100808852	chr7	100808852	100808852	-	vgf	nm_003378	1305	38	842	98	269.436	-0.266473	0.236016	-1.12905	0.258878	0.923316	0.0346496	d	0
chr19_3029612_3029612	chr19	3029612	3029612	-	tle2	nm_001144762	1174	56	735	145	292.869	-0.263621	0.233496	-1.12902	0.25889	0.923316	0.0346496	d	0
chr17_74137380_74137380	chr17	74137380	74137380	-	foxj1	nm_001454	1623	56	1036	146	355.738	-0.260339	0.230593	-1.12899	0.2589	0.923316	0.0346496	d	0
chrX_50213737_50213737	chrX	50213737	50213737	-	dgkk	nm_001013742	1035	60	728	135	281.427	-0.260576	0.230833	-1.12885	0.25896	0.923316	0.0346496	d	0
chr22_26565439_26565439	chr22	26565439	26565439	+	sez6l	nm_021115	1503	84	1036	198	403.888	-0.25357	0.224794	-1.12801	0.259315	0.923316	0.0346496	d	0
chr16_90142338_90142338	chr16	90142338	90142338	-	prdm7	nm_001098173	516	25	401	43	126.604	-0.284611	0.252507	-1.12714	0.259683	0.923316	0.0346496	d	0
chr9_35618424_35618424	chr9	35618424	35618424	-	cd72	nm_001782	586	27	373	65	142.213	-0.280461	0.248917	-1.12673	0.259858	0.923316	0.0346496	d	0
chr19_12941230_12941230	chr19	12941230	12941230	-	rtbdn	nm_001080997	902	53	652	114	246.008	-0.263047	0.233527	-1.12641	0.259993	0.923316	0.0346496	d	0
chr11_60739112_60739112	chr11	60739112	60739112	+	cd6	nr_045638	883	51	649	107	238.598	-0.26383	0.23434	-1.12584	0.260233	0.923316	0.0346496	d	0
chr2_20212455_20212455	chr2	20212455	20212455	-	matn3	nm_002381	418	24	266	55	111.15	-0.286151	0.254263	-1.12541	0.260414	0.923316	0.0346496	d	0
chr1_32083300_32083300	chr1	32083300	32083300	+	hcrtr1	nm_001525	862	42	535	108	216.405	-0.26952	0.239559	-1.12507	0.260561	0.923316	0.0346496	d	0
chr1_159175048_159175048	chr1	159175048	159175048	+	darc	nm_001122951	1102	69	742	164	312.194	-0.258387	0.229712	-1.12483	0.26066	0.923316	0.0346496	d	0
chr17_78161598_78161598	chr17	78161598	78161598	+	card14	nm_052819	653	30	445	67	158.466	-0.275576	0.245271	-1.12356	0.2612	0.923316	0.0346496	d	0
chr12_6419601_6419601	chr12	6419601	6419601	+	plekhg6	nm_018173	676	29	399	78	160.066	-0.278526	0.247914	-1.12348	0.261234	0.923316	0.0346496	d	0
chr2_152955235_152955235	chr2	152955235	152955235	-	cacnb4	nm_001005746	1126	119	1004	206	417.187	-0.256803	0.228623	-1.12326	0.261327	0.923316	0.0346496	d	0
chr12_14720791_14720791	chr12	14720791	14720791	-	plbd1	nm_024829	221	22	179	32	74.8302	-0.297448	0.264884	-1.12294	0.261464	0.923316	0.0346496	d	0
chr14_94423767_94423767	chr14	94423767	94423767	-	asb2	nm_016150	679	29	406	77	160.465	-0.277752	0.24751	-1.12218	0.261784	0.923316	0.0346496	d	0
chr9_100615536_100615536	chr9	100615536	100615536	+	foxe1	nm_004473	1908	58	1177	159	399.328	-0.25919	0.230989	-1.12209	0.261824	0.923316	0.0346496	d	0
chr20_42187634_42187634	chr20	42187634	42187634	+	sgk2	nm_170693	289	29	237	45	99.82	-0.289396	0.258194	-1.12085	0.262352	0.923316	0.0346496	d	0
chr20_58533470_58533470	chr20	58533470	58533470	+	cdh26	nm_177980	160	16	125	22	53.3355	-0.303306	0.270613	-1.12081	0.262369	0.923316	0.0346496	d	0
chr2_219745254_219745254	chr2	219745254	219745254	+	wnt10a	nm_025216	2357	93	1485	247	545.043	-0.251739	0.224664	-1.12051	0.262495	0.923316	0.0346496	d	0
chr11_10476665_10476665	chr11	10476665	10476665	+	ampd3	nm_001025389	247	18	152	39	72.8449	-0.295847	0.264038	-1.12047	0.262513	0.923316	0.0346496	d	0
chr19_30016659_30016659	chr19	30016659	30016659	-	loc284395	nr_040029	2054	70	1348	179	449.741	-0.253021	0.22586	-1.12026	0.262605	0.923316	0.0346496	d	0
chr2_26915580_26915580	chr2	26915580	26915580	+	kcnk3	nm_002246	1710	126	1285	274	528.096	-0.244638	0.218566	-1.11929	0.263017	0.923316	0.0346496	d	0
chr19_39687603_39687603	chr19	39687603	39687603	+	nccrp1	nm_001001414	1273	55	901	125	305.035	-0.257483	0.230044	-1.11927	0.263023	0.923316	0.0346496	d	0
chr17_72199794_72199794	chr17	72199794	72199794	+	rpl38	nm_000999	677	43	510	85	190.129	-0.268475	0.240004	-1.11863	0.2633	0.923316	0.0346496	d	0
chr15_71839540_71839540	chr15	71839540	71839540	+	thsd4	nm_001286429	665	46	449	105	196.573	-0.26737	0.239029	-1.11857	0.263324	0.923316	0.0346496	d	0
chr19_44304181_44304181	chr19	44304181	44304181	-	lypd5	nm_001288763	805	43	570	94	209.748	-0.265763	0.237614	-1.11846	0.263369	0.923316	0.0346496	d	0
chr21_44073861_44073861	chr21	44073861	44073861	+	pde9a	nm_001001571	2073	79	1249	219	471.773	-0.255986	0.22906	-1.11755	0.263759	0.923316	0.0346496	d	0
chr1_30510459_30510459	chr1	30510459	30510459	-	rp11-111i12.1	nr_110790	444	25	287	57	117.205	-0.282352	0.25284	-1.11672	0.264113	0.923316	0.0346496	d	0
chr1_201390874_201390874	chr1	201390874	201390874	-	tnni1	nm_003281	731	30	430	82	170.236	-0.275722	0.246941	-1.11655	0.264188	0.923316	0.0346496	d	0
chr7_48211056_48211056	chr7	48211056	48211056	+	abca13	nm_152701	226	16	176	23	63.5517	-0.29924	0.268124	-1.11605	0.264399	0.923316	0.0346496	d	0
chr20_43936937_43936937	chr20	43936937	43936937	-	matn4	nm_030592	576	22	365	54	129.609	-0.280723	0.251607	-1.11572	0.264541	0.923316	0.0346496	d	0
chrX_144899346_144899346	chrX	144899346	144899346	+	slitrk2	nm_001144003	693	49	496	105	206.598	-0.264643	0.237202	-1.11569	0.264556	0.923316	0.0346496	d	0
chr1_19186155_19186155	chr1	19186155	19186155	-	tas1r2	nm_152232	767	45	506	107	209.442	-0.265881	0.238569	-1.11449	0.265071	0.923316	0.0346496	d	0
chrX_152224765_152224765	chrX	152224765	152224765	+	pnma3	nm_001282535	796	39	531	92	199.821	-0.267304	0.239888	-1.11429	0.265156	0.923316	0.0346496	d	0
chr1_210111518_210111518	chr1	210111518	210111518	+	syt14	nm_001256006	753	78	613	147	276.148	-0.257918	0.231774	-1.1128	0.265793	0.923316	0.0346496	d	0
chr1_165325952_165325952	chr1	165325952	165325952	-	lmx1a	nm_177398	1489	73	1028	173	377.278	-0.25172	0.226247	-1.11259	0.265886	0.923316	0.0346496	d	0
chr15_73661605_73661605	chr15	73661605	73661605	-	hcn4	nm_005477	2144	89	1468	217	507.917	-0.246845	0.221892	-1.11246	0.265942	0.923316	0.0346496	d	0
chr2_10978103_10978103	chr2	10978103	10978103	-	pdia6	nm_001282705	971	76	762	151	306.064	-0.254773	0.229214	-1.11151	0.26635	0.923316	0.0346496	d	0
chr22_38453261_38453261	chr22	38453261	38453261	+	pick1	nm_012407	152	16	116	23	52.3592	-0.300793	0.270654	-1.11135	0.266416	0.923316	0.0346496	d	0
chr9_136605077_136605077	chr9	136605077	136605077	-	sardh	nm_007101	600	22	358	59	133.197	-0.280227	0.252292	-1.11072	0.266687	0.923316	0.0346496	d	0
chr9_139658965_139658965	chr9	139658965	139658965	-	lcn15	nm_203347	673	17	395	49	131.656	-0.282593	0.254623	-1.10985	0.267064	0.923316	0.0346496	d	0
chr11_117748201_117748201	chr11	117748201	117748201	-	fxyd6	nm_001164831	1702	100	1159	242	470.153	-0.246922	0.222597	-1.10928	0.267311	0.923316	0.0346496	d	0
chr18_55816564_55816564	chr18	55816564	55816564	+	nedd4l	nm_001144969	174	16	116	29	56.8487	-0.298015	0.268706	-1.10907	0.267398	0.923316	0.0346496	d	0
chr19_7764365_7764365	chr19	7764365	7764365	-	fcer2	nm_001207019	840	44	545	108	217.952	-0.264032	0.238358	-1.10771	0.267986	0.923316	0.0346496	d	0
chr5_1295162_1295162	chr5	1295162	1295162	-	tert	nm_198253	1500	36	957	97	292.272	-0.261225	0.236071	-1.10655	0.268488	0.923316	0.0346496	d	0
chr21_43483067_43483067	chr21	43483067	43483067	+	umodl1	nm_001199527	724	26	443	69	160.022	-0.273933	0.24773	-1.10577	0.268824	0.923316	0.0346496	d	0
chr17_72709139_72709139	chr17	72709139	72709139	-	cd300lf	nm_001289084	847	52	555	126	237.331	-0.260983	0.236081	-1.10548	0.268951	0.923316	0.0346496	d	0
chr14_23887272_23887272	chr14	23887272	23887272	-	mir208b	nr_030624	873	47	583	112	229.407	-0.261449	0.236594	-1.10505	0.269136	0.923316	0.0346496	d	0
chr14_96505660_96505660	chr14	96505660	96505660	+	c14orf132	nm_001252507	205	17	140	31	63.5682	-0.294737	0.266725	-1.10502	0.26915	0.923316	0.0346496	d	0
chr3_182971031_182971031	chr3	182971031	182971031	+	b3gnt5	nm_032047	1063	84	797	179	338.999	-0.249787	0.226089	-1.10482	0.269239	0.923316	0.0346496	d	0
chr17_37824233_37824233	chr17	37824233	37824233	+	pnmt	nr_073461	1833	43	950	144	348.346	-0.269629	0.244075	-1.1047	0.26929	0.923316	0.0346496	d	0
chr16_23313590_23313590	chr16	23313590	23313590	+	scnn1b	nm_000336	1064	60	752	136	286.308	-0.254654	0.230561	-1.10449	0.269378	0.923316	0.0346496	d	0
chr10_72238563_72238563	chr10	72238563	72238563	+	pald1	nm_014431	1212	51	767	133	287.166	-0.25832	0.234081	-1.10355	0.26979	0.923316	0.0346496	d	0
chr2_231789941_231789941	chr2	231789941	231789941	-	gpr55	nm_005683	1025	37	606	104	227.797	-0.266688	0.241754	-1.10314	0.269968	0.923316	0.0346496	d	0
chr8_144242053_144242053	chr8	144242053	144242053	-	ly6h	nm_001130478	1315	46	805	126	289.488	-0.260396	0.236072	-1.10304	0.270011	0.923316	0.0346496	d	0
chr1_35220647_35220647	chr1	35220647	35220647	+	gjb5	nm_005268	518	33	318	82	146.982	-0.273769	0.248242	-1.10283	0.2701	0.923316	0.0346496	d	0
chr17_40333296_40333296	chr17	40333296	40333296	-	kcnh4	nm_012285	1041	44	669	112	246.768	-0.260731	0.236454	-1.10267	0.270169	0.923316	0.0346496	d	0
chr14_104583741_104583741	chr14	104583741	104583741	+	mir203	nr_029620	1587	37	872	118	302.607	-0.267723	0.242857	-1.10239	0.270293	0.923316	0.0346496	d	0
chr9_1050619_1050619	chr9	1050619	1050619	+	dmrt2	nm_181872	1243	60	850	143	312.443	-0.253418	0.230067	-1.1015	0.27068	0.923316	0.0346496	d	0
chr10_106400858_106400858	chr10	106400858	106400858	+	sorcs3	nm_014978	1924	48	1194	134	378.538	-0.256167	0.232692	-1.10089	0.270946	0.923316	0.0346496	d	0
chr2_64432619_64432619	chr2	64432619	64432619	-	linc00309	nr_033837	315	38	251	66	123.661	-0.276508	0.251371	-1.1	0.271333	0.923316	0.0346496	d	0
chr19_54494402_54494402	chr19	54494402	54494402	+	cacng6	nr_102308	1248	34	737	99	251.248	-0.265479	0.241454	-1.0995	0.271549	0.923316	0.0346496	d	0
chr7_419390_419390	chr7	419390	419390	+	ac226118.1	nr_033960	1281	34	780	96	256.296	-0.263744	0.239905	-1.09937	0.271608	0.923316	0.0346496	d	0
chr22_24823529_24823529	chr22	24823529	24823529	+	adora2a	nm_001278499	1117	24	535	89	206.317	-0.280557	0.255218	-1.09929	0.271643	0.923316	0.0346496	d	0
chr11_3253616_3253616	chr11	3253616	3253616	-	mrgpre	nm_001039165	1418	59	949	146	335.308	-0.252192	0.229427	-1.09923	0.271669	0.923316	0.0346496	d	0
chr3_126113641_126113641	chr3	126113641	126113641	-	ccdc37-as1	nr_103788	983	68	723	147	292.027	-0.252065	0.229335	-1.09911	0.271719	0.923316	0.0346496	d	0
chr12_52301201_52301201	chr12	52301201	52301201	+	acvrl1	nm_000020	271	19	172	41	78.6517	-0.288076	0.262262	-1.09843	0.272018	0.923316	0.0346496	d	0
chr15_89911247_89911247	chr15	89911247	89911247	+	mir9-3	nr_029692	2705	148	1897	355	725.221	-0.237317	0.216105	-1.09816	0.272135	0.923316	0.0346496	d	0
chr19_54784392_54784392	chr19	54784392	54784392	-	lilrb2	nm_001278406	441	18	311	36	100.977	-0.282392	0.257251	-1.09773	0.272323	0.923316	0.0346496	d	0
chr19_46476657_46476657	chr19	46476657	46476657	-	nova2	nm_002516	1832	109	1313	252	509.595	-0.241466	0.220096	-1.09709	0.272602	0.923637	0.0344986	d	0
chr8_22022652_22022652	chr8	22022652	22022652	+	bmp1	nr_033404	845	34	506	93	195.923	-0.267306	0.243738	-1.09669	0.272775	0.923637	0.0344986	d	0
chr20_62178857_62178857	chr20	62178857	62178857	-	srms	nm_080823	1262	25	721	79	230.909	-0.269632	0.246354	-1.09449	0.273741	0.924363	0.0341574	d	0
chr19_1524072_1524072	chr19	1524072	1524072	+	plk5	nm_001243079	1610	55	980	153	351.755	-0.255402	0.23336	-1.09445	0.273756	0.924363	0.0341574	d	0
chr14_21493264_21493264	chr14	21493264	21493264	-	ndrg2	nm_201538	1556	83	1063	201	410.646	-0.245828	0.224824	-1.09343	0.274207	0.924887	0.0339113	d	0
chr4_6422845_6422845	chr4	6422845	6422845	-	ppp2r2c	nm_001206996	587	36	412	78	162.597	-0.266133	0.24363	-1.09236	0.274673	0.924887	0.0339113	d	0
chr17_42019833_42019833	chr17	42019833	42019833	-	ppy	nm_002722	444	21	265	54	109.032	-0.279667	0.256094	-1.09205	0.274812	0.924887	0.0339113	d	0
chr16_3306627_3306627	chr16	3306627	3306627	-	mefv	nm_000243	351	16	233	34	83.5729	-0.285482	0.261479	-1.0918	0.274922	0.924887	0.0339113	d	0
chr6_134210258_134210258	chr6	134210258	134210258	+	tcf21	nm_198392	1296	92	1014	189	391.008	-0.244904	0.224313	-1.09179	0.274924	0.924887	0.0339113	d	0
chr6_134210259_134210259	chr6	134210259	134210259	+	tcf21	nm_003206	1296	92	1014	189	391.008	-0.244904	0.224313	-1.09179	0.274924	0.924887	0.0339113	d	0
chr17_73720775_73720775	chr17	73720775	73720775	+	itgb4	nm_001005619	606	18	339	54	124.864	-0.279738	0.256367	-1.09116	0.275202	0.925064	0.033828	d	0
chr17_62075710_62075710	chr17	62075710	62075710	+	c17orf72	nm_001164257	738	41	519	91	196.097	-0.260751	0.23921	-1.09005	0.275691	0.925574	0.0335889	d	0
chr4_8594386_8594386	chr4	8594386	8594386	+	cpz	nm_001014448	1220	34	662	108	246.53	-0.267601	0.245715	-1.08907	0.276122	0.925659	0.0335488	d	0
chr1_246687589_246687589	chr1	246687589	246687589	-	rp11-690c23.2	nr_040002	357	23	265	42	99.0367	-0.279961	0.257134	-1.08878	0.276253	0.925659	0.0335488	d	0
chr10_71333210_71333210	chr10	71333210	71333210	-	neurog3	nm_020999	2390	108	1703	255	588.686	-0.238099	0.218722	-1.08859	0.276333	0.925659	0.0335488	d	0
chr12_48119355_48119355	chr12	48119355	48119355	-	endou	nm_001172439	234	19	161	36	72.4475	-0.28725	0.263936	-1.08833	0.276449	0.925659	0.0335488	d	0
chr19_8809180_8809180	chr19	8809180	8809180	-	actl9	nm_178525	415	17	287	35	95.1136	-0.281425	0.258648	-1.08806	0.276569	0.925659	0.0335488	d	0
chr17_77900524_77900524	chr17	77900524	77900524	-	rp11-353n14.5	nr_110850	850	18	440	63	157.404	-0.278996	0.256442	-1.08795	0.276617	0.925659	0.0335488	d	0
chr19_54850421_54850421	chr19	54850421	54850421	-	lilra4	nm_012276	404	20	260	46	100.527	-0.279435	0.257048	-1.08709	0.276996	0.926047	0.033367	d	0
chr12_50356566_50356566	chr12	50356566	50356566	-	loc101927318	nr_110591	1160	37	707	103	247.025	-0.260424	0.239711	-1.08641	0.277297	0.926047	0.033367	d	0
chr17_43045644_43045644	chr17	43045644	43045644	-	c1ql1	nm_006688	1530	49	914	140	326.325	-0.256169	0.235848	-1.08616	0.277407	0.926047	0.033367	d	0
chr8_124214983_124214983	chr8	124214983	124214983	-	fam83a-as1	nr_024479	248	16	164	32	68.3536	-0.288169	0.26538	-1.08588	0.277534	0.926047	0.033367	d	0
chr6_134210144_134210144	chr6	134210144	134210144	-	rp3-323p13.2	nr_109982	1275	93	1004	190	390.121	-0.243696	0.224464	-1.08568	0.277621	0.926047	0.033367	d	0
chr17_56606828_56606828	chr17	56606828	56606828	-	38231	nr_037155	470	24	305	56	119.192	-0.274105	0.252728	-1.08459	0.278105	0.926047	0.033367	d	0
chr15_42651697_42651697	chr15	42651697	42651697	+	capn3	nm_173087	91	19	92	19	47.2134	-0.296218	0.273158	-1.08442	0.278179	0.926047	0.033367	d	0
chr1_51787938_51787938	chr1	51787938	51787938	-	ttc39a	nm_001080494	204	18	147	31	65.3218	-0.288862	0.266385	-1.08438	0.278197	0.926047	0.033367	d	0
chr17_72919358_72919358	chr17	72919358	72919358	-	ush1g	nm_173477	2090	64	1279	180	439.737	-0.249247	0.230422	-1.0817	0.279388	0.928563	0.0321888	d	0
chr17_42992920_42992920	chr17	42992920	42992920	-	gfap	nm_001131019	575	21	290	68	128.107	-0.279064	0.257997	-1.08166	0.279405	0.928563	0.0321888	d	0
chr7_45927958_45927958	chr7	45927958	45927958	+	igfbp1	nm_000596	377	19	236	45	94.5825	-0.279663	0.258753	-1.08081	0.279781	0.929439	0.031779	d	0
chr19_42817476_42817476	chr19	42817476	42817476	+	tmem145	nm_173633	1135	48	719	126	269.936	-0.254161	0.235362	-1.07987	0.280199	0.930451	0.0313063	d	0
chr22_39636914_39636914	chr22	39636914	39636914	-	pdgfb	nm_033016	1303	43	884	106	282.678	-0.251771	0.233363	-1.07888	0.280639	0.93116	0.0309755	d	0
chr20_43104525_43104525	chr20	43104525	43104525	+	ttpal	nm_001039199	133	15	106	20	47.3741	-0.29319	0.272024	-1.07781	0.281118	0.931543	0.030797	d	0
chr20_8112911_8112911	chr20	8112911	8112911	+	plcb1	nm_182734	445	34	347	62	135.796	-0.268443	0.249132	-1.07752	0.28125	0.931543	0.030797	d	0
chr17_6983600_6983600	chr17	6983600	6983600	-	clec10a	nm_006344	887	57	636	127	254.187	-0.250537	0.232649	-1.07689	0.28153	0.931543	0.030797	d	0
chr7_150690891_150690891	chr7	150690891	150690891	+	nos3	nm_001160111	448	15	273	39	95.9154	-0.279365	0.25965	-1.07593	0.281959	0.931543	0.030797	d	0
chr1_212797788_212797788	chr1	212797788	212797788	+	fam71a	nm_153606	766	47	492	117	215.117	-0.256977	0.238989	-1.07527	0.282254	0.931543	0.030797	d	0
chr1_3528059_3528059	chr1	3528059	3528059	-	megf6	nm_001409	1472	34	780	114	279.838	-0.264696	0.24624	-1.07495	0.282396	0.931543	0.030797	d	0
chr4_144621828_144621828	chr4	144621828	144621828	-	frem3	nm_001168235	1443	90	1069	200	410.179	-0.239688	0.223006	-1.0748	0.282463	0.931543	0.030797	d	0
chr19_45409038_45409038	chr19	45409038	45409038	+	apoe	nm_000041	862	24	509	70	174.899	-0.266981	0.248402	-1.0748	0.282466	0.931543	0.030797	d	0
chr1_220101993_220101993	chr1	220101993	220101993	-	slc30a10	nm_018713	837	53	640	108	237.008	-0.252023	0.234627	-1.07414	0.28276	0.931543	0.030797	d	0
chr2_177465780_177465780	chr2	177465780	177465780	-	mir1246	nr_031648	481	55	406	96	184.941	-0.25986	0.242285	-1.07254	0.283478	0.931543	0.030797	d	0
chr1_11539294_11539294	chr1	11539294	11539294	+	ptchd2	nm_020780	1447	56	896	153	332.523	-0.249981	0.233084	-1.07249	0.2835	0.931543	0.030797	d	0
chr10_104169041_104169041	chr10	104169041	104169041	-	psd	nr_073110	2151	90	1347	244	511.384	-0.24241	0.226066	-1.0723	0.283587	0.931543	0.030797	d	0
chr5_524549_524549	chr5	524549	524549	-	slc9a3	nm_004174	2137	62	1255	183	440.343	-0.249837	0.233165	-1.0715	0.283944	0.931943	0.0306108	d	0
chr9_130517583_130517583	chr9	130517583	130517583	-	sh2d3c	nm_001142533	1538	50	962	137	331.019	-0.25011	0.233488	-1.07119	0.284085	0.931943	0.0306108	d	0
chr17_39623638_39623638	chr17	39623638	39623638	-	krt32	nm_002278	284	15	177	34	72.069	-0.283384	0.264714	-1.07053	0.284381	0.931985	0.0305909	d	0
chr2_179059207_179059207	chr2	179059207	179059207	+	osbpl6	nm_001201482	167	22	163	24	65.4621	-0.289293	0.270393	-1.0699	0.284664	0.931985	0.0305909	d	0
chr1_201346828_201346828	chr1	201346828	201346828	-	tnnt2	nm_001001430	794	46	550	106	216.224	-0.253468	0.23704	-1.0693	0.284932	0.931985	0.0305909	d	0
chr13_29069265_29069265	chr13	29069265	29069265	-	flt1	nm_001159920	1669	80	1144	196	420.875	-0.240159	0.224609	-1.06923	0.284966	0.931985	0.0305909	d	0
chr7_120498177_120498177	chr7	120498177	120498177	-	tspan12	nm_012338	516	58	449	98	196.087	-0.258884	0.242166	-1.06903	0.285054	0.931985	0.0305909	d	0
chr14_90528108_90528108	chr14	90528108	90528108	+	kcnk13	nm_022054	1632	103	1315	208	466.386	-0.23754	0.222444	-1.06787	0.285581	0.931985	0.0305909	d	0
chr20_1974394_1974394	chr20	1974394	1974394	-	pdyn	nm_001190900	1778	138	1385	295	566.489	-0.232531	0.217787	-1.0677	0.285654	0.931985	0.0305909	d	0
chr6_868497_868497	chr6	868497	868497	+	loc101927691	nr_110853	639	40	440	91	180.01	-0.257489	0.241247	-1.06732	0.285825	0.931985	0.0305909	d	0
chr19_18335303_18335303	chr19	18335303	18335303	-	pde4c	nm_001098819	608	18	389	46	125.761	-0.270309	0.253267	-1.06729	0.285841	0.931985	0.0305909	d	0
chr9_138364095_138364095	chr9	138364095	138364095	-	ppp1r26-as1	nr_038969	412	21	290	43	103.652	-0.273092	0.255934	-1.06704	0.285954	0.931985	0.0305909	d	0
chr19_3772219_3772219	chr19	3772219	3772219	-	rax2	nm_032753	492	19	303	49	111.5	-0.272791	0.255701	-1.06684	0.286046	0.931985	0.0305909	d	0
chr22_23412668_23412668	chr22	23412668	23412668	+	gnaz	nm_002073	647	31	443	71	160.843	-0.261192	0.244857	-1.06671	0.286102	0.931985	0.0305909	d	0
chr19_48898131_48898131	chr19	48898131	48898131	+	grin2d	nm_000836	1509	36	840	115	290.95	-0.259143	0.243069	-1.06613	0.286365	0.932122	0.0305272	d	0
chr2_219850379_219850379	chr2	219850379	219850379	-	fev	nm_017521	2332	117	1604	289	601.795	-0.233699	0.219256	-1.06587	0.286482	0.932122	0.0305272	d	0
chr22_43506753_43506753	chr22	43506753	43506753	+	bik	nm_001197	1462	64	994	158	354.33	-0.242649	0.228037	-1.06408	0.287294	0.933279	0.0299884	d	0
chr21_45978643_45978643	chr21	45978643	45978643	-	krtap10-3	nm_198696	744	54	600	102	224.535	-0.252172	0.237141	-1.06339	0.287607	0.93378	0.0297555	d	0
chr9_130517561_130517561	chr9	130517561	130517561	-	sh2d3c	nm_001142534	1539	50	966	137	331.448	-0.248078	0.233392	-1.06293	0.287816	0.93378	0.0297555	d	0
chr3_126113781_126113781	chr3	126113781	126113781	+	ccdc37	nm_182628	948	67	705	145	285.508	-0.24414	0.229778	-1.0625	0.288009	0.93378	0.0297555	d	0
chr20_56725982_56725982	chr20	56725982	56725982	+	c20orf85	nm_178456	1009	72	718	165	306.733	-0.242597	0.228626	-1.06111	0.28864	0.93378	0.0297555	d	0
chr17_72588370_72588370	chr17	72588370	72588370	-	cd300ld	nm_001115152	409	28	279	61	119.171	-0.266983	0.251644	-1.06095	0.288711	0.93378	0.0297555	d	0
chr17_42422490_42422490	chr17	42422490	42422490	+	grn	nm_002087	238	17	169	31	68.7549	-0.281383	0.265346	-1.06044	0.288944	0.93378	0.0297555	d	0
chr8_136469715_136469715	chr8	136469715	136469715	+	khdrbs3	nm_006558	536	29	351	69	140.526	-0.263453	0.248499	-1.06018	0.289064	0.93378	0.0297555	d	0
chr21_42797957_42797957	chr21	42797957	42797957	+	mx1	nm_002462	349	17	244	34	85.5946	-0.276471	0.260827	-1.05998	0.289154	0.93378	0.0297555	d	0
chr14_24540045_24540045	chr14	24540045	24540045	+	cpne6	nm_001280558	1585	71	975	195	387.907	-0.24432	0.230633	-1.05935	0.289441	0.93378	0.0297555	d	0
chr7_8473584_8473584	chr7	8473584	8473584	+	nxph1	nm_152745	1676	99	1184	235	465.843	-0.23525	0.222081	-1.0593	0.289464	0.93378	0.0297555	d	0
chr2_232260334_232260334	chr2	232260334	232260334	+	b3gnt7	nm_145236	1258	36	725	109	257.984	-0.256614	0.242302	-1.05907	0.289569	0.93378	0.0297555	d	0
chr17_31421_31421	chr17	31421	31421	-	doc2b	nm_003585	1881	69	1172	190	424.217	-0.242846	0.229477	-1.05826	0.289939	0.934293	0.0295168	d	0
chr4_5889540_5889540	chr4	5889540	5889540	-	crmp1	nm_001288662	1964	75	1188	212	449.606	-0.243478	0.230149	-1.05792	0.290093	0.934293	0.0295168	d	0
chr20_43936967_43936967	chr20	43936967	43936967	-	matn4	nm_030590	576	21	363	54	128.211	-0.266799	0.252304	-1.05745	0.290306	0.934293	0.0295168	d	0
chr6_34073759_34073759	chr6	34073759	34073759	-	grm4	nm_001256813	1348	57	838	155	321.62	-0.246662	0.233269	-1.05742	0.290322	0.934293	0.0295168	d	0
chr20_61885329_61885329	chr20	61885329	61885329	+	flj16779	nr_024389	1843	54	1163	149	383.445	-0.244555	0.231307	-1.05728	0.290386	0.934293	0.0295168	d	0
chr12_49741040_49741040	chr12	49741040	49741040	+	dnajc22	nm_024902	1115	32	694	89	229.806	-0.254647	0.241074	-1.0563	0.290832	0.934621	0.0293642	d	0
chr1_84764048_84764048	chr1	84764048	84764048	+	samd13	nm_001010971	169	18	133	27	59.4702	-0.283837	0.268726	-1.05623	0.290861	0.934621	0.0293642	d	0
chr11_7847519_7847519	chr11	7847519	7847519	-	or5p3	nm_153445	133	19	133	19	54.1712	-0.287757	0.272517	-1.05592	0.291004	0.934621	0.0293642	d	0
chrX_72667089_72667089	chrX	72667089	72667089	+	cdx4	nm_005193	422	35	365	55	133.566	-0.265965	0.252176	-1.05468	0.29157	0.935269	0.0290636	d	0
chr17_74075262_74075262	chr17	74075262	74075262	+	zacn	nm_180990	1761	70	1187	177	411.193	-0.238405	0.226165	-1.05412	0.291828	0.935269	0.0290636	d	0
chr20_58251715_58251715	chr20	58251715	58251715	+	phactr3	nm_001199506	329	25	224	53	100.636	-0.269651	0.25588	-1.05382	0.291967	0.935269	0.0290636	d	0
chr10_82297657_82297657	chr10	82297657	82297657	+	sh2d4b	nm_207372	452	23	295	54	114.74	-0.267082	0.253703	-1.05274	0.292462	0.93638	0.028548	d	0
chr6_111368757_111368757	chr6	111368757	111368757	-	gstm2p1	nr_002932	259	28	263	31	92.1056	-0.280257	0.266293	-1.05244	0.292598	0.936452	0.0285146	d	0
chr15_92937139_92937139	chr15	92937139	92937139	+	st8sia2	nm_006011	1765	73	1193	184	418.88	-0.237321	0.225653	-1.05171	0.292934	0.936605	0.0284436	d	0
chr4_107957453_107957453	chr4	107957453	107957453	-	dkk2	nm_014421	1056	82	825	170	334.351	-0.238292	0.226897	-1.05022	0.293617	0.936605	0.0284436	d	0
chr7_139208673_139208673	chr7	139208673	139208673	+	clec2l	nm_001080511	1420	77	966	190	378.907	-0.237657	0.226462	-1.04943	0.293978	0.936605	0.0284436	d	0
chr19_49243970_49243970	chr19	49243970	49243970	-	rasip1	nm_017805	801	18	492	52	153.007	-0.263518	0.251231	-1.04891	0.294222	0.936605	0.0284436	d	0
chr16_222845_222845	chr16	222845	222845	+	hba2	nm_000517	738	40	558	82	194.197	-0.251249	0.239719	-1.0481	0.294593	0.936605	0.0284436	d	0
chr5_179636130_179636130	chr5	179636130	179636130	-	rasgef1c	nm_175062	1120	41	642	122	251.636	-0.253397	0.241843	-1.04778	0.294742	0.936605	0.0284436	d	0
chr18_74844774_74844774	chr18	74844774	74844774	-	mbp	nm_001025100	872	40	624	90	214.37	-0.248967	0.237628	-1.04771	0.29477	0.936605	0.0284436	d	0
chr6_39197251_39197251	chr6	39197251	39197251	-	kcnk5	nm_003740	1002	54	718	123	265.118	-0.243333	0.232291	-1.04754	0.294852	0.936605	0.0284436	d	0
chr20_51588945_51588945	chr20	51588945	51588945	+	tshz2	nm_173485	931	60	693	130	267.732	-0.242369	0.231397	-1.04742	0.294907	0.936605	0.0284436	d	0
chr19_460996_460996	chr19	460996	460996	-	shc2	nm_012435	1147	23	690	70	212.416	-0.257718	0.24606	-1.04738	0.294926	0.936605	0.0284436	d	0
chr19_1286152_1286152	chr19	1286152	1286152	+	efna2	nm_001405	1490	25	842	84	262.092	-0.257957	0.246373	-1.04702	0.295092	0.936605	0.0284436	d	0
chr1_228699989_228699989	chr1	228699989	228699989	-	btnl10	nm_001287262	987	59	645	149	275.439	-0.244152	0.233248	-1.04675	0.295215	0.936605	0.0284436	d	0
chr11_61276271_61276271	chr11	61276271	61276271	+	lrrc10b	nm_001145077	1655	61	1040	167	374.294	-0.241701	0.231002	-1.04631	0.295417	0.936605	0.0284436	d	0
chr21_40033618_40033618	chr21	40033618	40033618	-	erg	nm_001243432	1079	89	911	168	351.364	-0.238584	0.228147	-1.04575	0.295676	0.936605	0.0284436	d	0
chr2_3649495_3649495	chr2	3649495	3649495	+	colec11	nm_001255985	516	22	351	50	121.743	-0.263757	0.252346	-1.04522	0.295922	0.936605	0.0284436	d	0
chr3_42727010_42727010	chr3	42727010	42727010	+	klhl40	nm_152393	902	30	528	88	195.273	-0.25701	0.245966	-1.0449	0.296069	0.936605	0.0284436	d	0
chr17_3867758_3867758	chr17	3867758	3867758	-	atp2a3	nm_174958	1463	47	950	125	314.823	-0.24345	0.233047	-1.04464	0.29619	0.936605	0.0284436	d	0
chr16_8768443_8768443	chr16	8768443	8768443	+	abat	nm_020686	395	21	252	50	102.14	-0.268064	0.256717	-1.0442	0.296393	0.936605	0.0284436	d	0
chr5_180018487_180018487	chr5	180018487	180018487	-	scgb3a1	nm_052863	1423	42	878	119	296.487	-0.247089	0.236718	-1.04381	0.296573	0.936605	0.0284436	d	0
chr1_20306932_20306932	chr1	20306932	20306932	-	pla2g2a	nm_000300	1050	85	850	169	339.266	-0.237626	0.227696	-1.04361	0.296665	0.936605	0.0284436	d	0
chr20_45280100_45280100	chr20	45280100	45280100	-	slc13a3	nm_001193342	738	69	674	113	253.843	-0.249383	0.238965	-1.0436	0.29667	0.936605	0.0284436	d	0
chr6_30043626_30043626	chr6	30043626	30043626	-	rnf39	nm_170769	1601	92	1182	209	439.283	-0.231734	0.222119	-1.04329	0.296814	0.936605	0.0284436	d	0
chr6_30043628_30043628	chr6	30043628	30043628	-	rnf39	nm_025236	1601	92	1182	209	439.283	-0.231734	0.222119	-1.04329	0.296814	0.936605	0.0284436	d	0
chr19_35606731_35606731	chr19	35606731	35606731	+	fxyd3	nm_001136011	577	27	325	78	143.191	-0.262713	0.251859	-1.04309	0.296905	0.936605	0.0284436	d	0
chr11_68518988_68518988	chr11	68518988	68518988	-	mtl5	nm_001039656	263	18	205	29	74.2257	-0.275821	0.264673	-1.04212	0.297355	0.936605	0.0284436	d	0
chr11_131240370_131240370	chr11	131240370	131240370	+	ntm	nm_001048209	937	65	712	138	279.614	-0.240054	0.230399	-1.0419	0.297456	0.936605	0.0284436	d	0
chr2_220492291_220492291	chr2	220492291	220492291	+	slc4a3	nm_005070	548	26	367	61	135.593	-0.2599	0.249481	-1.04176	0.297523	0.936605	0.0284436	d	0
chr9_139640612_139640612	chr9	139640612	139640612	+	loc100128593	nr_033913	1022	22	574	72	191.915	-0.260747	0.250363	-1.04147	0.297656	0.936605	0.0284436	d	0
chr1_155006257_155006257	chr1	155006257	155006257	-	dcst2	nm_144622	530	28	344	68	137.756	-0.259597	0.249295	-1.04133	0.297725	0.936605	0.0284436	d	0
chr16_31228395_31228395	chr16	31228395	31228395	-	pydc1	nm_152901	1671	48	1022	138	344.97	-0.244461	0.234783	-1.04122	0.297772	0.936605	0.0284436	d	0
chr17_53800225_53800225	chr17	53800225	53800225	-	tmem100	nm_018286	115	15	96	19	44.5993	-0.283815	0.272683	-1.04083	0.297957	0.936826	0.0283413	d	0
chr1_236681513_236681513	chr1	236681513	236681513	+	lgals8	nm_201545	164	18	116	32	59.8495	-0.278591	0.267823	-1.04021	0.298244	0.936951	0.0282833	d	0
chr19_7812464_7812464	chr19	7812464	7812464	-	cd209	nr_026692	515	25	333	61	128.746	-0.261117	0.251233	-1.03934	0.298646	0.937202	0.0281667	d	0
chr16_56598960_56598960	chr16	56598960	56598960	+	mt4	nm_032935	784	53	602	109	229.877	-0.244192	0.23513	-1.03854	0.299018	0.937517	0.028021	d	0
chr2_6910442_6910442	chr2	6910442	6910442	-	linc00487	nr_038369	318	17	207	38	81.6829	-0.27186	0.26179	-1.03847	0.299054	0.937517	0.028021	d	0
chr16_81478774_81478774	chr16	81478774	81478774	+	cmip	nm_198390	274	17	185	35	74.8615	-0.273393	0.263446	-1.03776	0.299384	0.937517	0.028021	d	0
chr1_1109285_1109285	chr1	1109285	1109285	+	ttll10	nm_001130045	1429	43	929	115	300.829	-0.242977	0.234195	-1.0375	0.299504	0.937517	0.028021	d	0
chr19_58864865_58864865	chr19	58864865	58864865	-	a1bg	nm_130786	912	29	533	86	194.385	-0.255573	0.24641	-1.03719	0.299649	0.937517	0.028021	d	0
chr19_35842444_35842444	chr19	35842444	35842444	+	ffar1	nm_005303	736	28	470	73	167.601	-0.254848	0.245774	-1.03692	0.299773	0.937517	0.028021	d	0
chr16_30022401_30022401	chr16	30022401	30022401	-	doc2a	nm_003586	1049	24	690	64	203.027	-0.251833	0.243214	-1.03544	0.300465	0.937699	0.0279365	d	0
chr10_134901408_134901408	chr10	134901408	134901408	+	gpr123	nm_001083909	1892	39	1090	124	351.35	-0.248177	0.239684	-1.03544	0.300465	0.937699	0.0279365	d	0
chr11_76839309_76839309	chr11	76839309	76839309	+	myo7a	nm_000260	502	17	301	47	108.778	-0.266357	0.257331	-1.03507	0.300635	0.937699	0.0279365	d	0
chr11_76839315_76839315	chr11	76839315	76839315	+	myo7a	nm_001127180	502	17	301	47	108.778	-0.266357	0.257331	-1.03507	0.300635	0.937699	0.0279365	d	0
chr6_36665627_36665627	chr6	36665627	36665627	+	rab44	nm_001257357	265	17	165	39	74.2042	-0.273032	0.263884	-1.03467	0.300824	0.937699	0.0279365	d	0
chr12_50355278_50355278	chr12	50355278	50355278	+	aqp5	nm_001651	1005	35	657	91	222.295	-0.247538	0.239339	-1.03426	0.301017	0.937699	0.0279365	d	0
chr8_73449625_73449625	chr8	73449625	73449625	+	kcnb2	nm_004770	1153	88	936	176	361.904	-0.233963	0.226585	-1.03256	0.30181	0.938534	0.0275501	d	0
chr17_39710747_39710747	chr17	39710747	39710747	-	linc00974	nr_038442	339	30	290	47	110.598	-0.264344	0.256296	-1.0314	0.302354	0.938889	0.0273857	d	0
chr11_64216528_64216528	chr11	64216528	64216528	+	loc100996455	nr_073177	882	43	596	105	223.199	-0.244932	0.237628	-1.03074	0.302664	0.938889	0.0273857	d	0
chr10_108924466_108924466	chr10	108924466	108924466	-	sorcs1	nm_001013031	873	62	635	139	264.526	-0.238308	0.231506	-1.02938	0.303299	0.938889	0.0273857	d	0
chr1_43803474_43803474	chr1	43803474	43803474	+	mpl	nm_005373	536	32	372	72	147.387	-0.253416	0.246385	-1.02854	0.303697	0.938889	0.0273857	d	0
chr1_203463270_203463270	chr1	203463270	203463270	+	optc	nm_014359	447	25	313	54	118.354	-0.25936	0.252217	-1.02832	0.303799	0.938889	0.0273857	d	0
chr5_1201709_1201709	chr5	1201709	1201709	+	slc6a19	nm_001003841	954	18	491	67	172.041	-0.263745	0.25649	-1.02829	0.303815	0.938889	0.0273857	d	0
chr20_62103993_62103993	chr20	62103993	62103993	-	kcnq2	nm_172109	1817	48	1088	143	364.752	-0.242252	0.235666	-1.02795	0.303975	0.938889	0.0273857	d	0
chr20_524482_524482	chr20	524482	524482	-	csnk2a1	nm_001895	278	25	209	46	92.0493	-0.265575	0.258462	-1.02752	0.304175	0.938889	0.0273857	d	0
chr11_10472223_10472223	chr11	10472223	10472223	+	ampd3	nm_000480	471	32	327	71	137.775	-0.254526	0.24782	-1.02706	0.304392	0.938889	0.0273857	d	0
chr7_155326539_155326539	chr7	155326539	155326539	-	cnpy1	nm_001103176	1816	116	1300	276	526.609	-0.225766	0.219924	-1.02656	0.304628	0.938889	0.0273857	d	0
chr11_17035963_17035963	chr11	17035963	17035963	-	plekha7	nm_175058	444	23	305	51	113.609	-0.260142	0.253531	-1.02607	0.304857	0.938889	0.0273857	d	0
chr3_153839148_153839148	chr3	153839148	153839148	+	arhgef26	nm_015595	804	64	643	127	256.678	-0.239088	0.233125	-1.02558	0.305091	0.938889	0.0273857	d	0
chr15_99548885_99548885	chr15	99548885	99548885	-	pgpep1l	nm_001102612	275	15	201	27	70.266	-0.272134	0.265377	-1.02546	0.305145	0.938889	0.0273857	d	0
chr19_50472911_50472911	chr19	50472911	50472911	+	siglec16	nr_002825	386	17	255	39	91.7987	-0.265999	0.259431	-1.02532	0.305214	0.938889	0.0273857	d	0
chr11_124981659_124981659	chr11	124981659	124981659	-	tmem218	nr_047587	142	17	113	25	53.4216	-0.277061	0.270397	-1.02464	0.305531	0.938889	0.0273857	d	0
chr3_98451495_98451495	chr3	98451495	98451495	-	st3gal6-as1	nr_046683	313	33	240	62	114.609	-0.258579	0.252641	-1.02351	0.306069	0.938938	0.027363	d	0
chr10_99609555_99609555	chr10	99609555	99609555	-	linc00866	nr_108035	1260	87	956	191	377.837	-0.229486	0.224261	-1.0233	0.306166	0.938938	0.027363	d	0
chr22_31536469_31536469	chr22	31536469	31536469	-	pla2g3	nm_015715	1261	51	751	147	296.059	-0.242508	0.237174	-1.02249	0.306548	0.938967	0.0273497	d	0
chrX_71525764_71525764	chrX	71525764	71525764	-	cited1	nm_001144887	737	44	536	97	203.887	-0.243232	0.237965	-1.02214	0.306716	0.938967	0.0273497	d	0
chr9_139557378_139557378	chr9	139557378	139557378	+	egfl7	nr_045110	875	17	466	61	159.555	-0.261987	0.256329	-1.02207	0.306746	0.938967	0.0273497	d	0
chr15_31453476_31453476	chr15	31453476	31453476	-	trpm1	nm_001252020	1069	45	662	124	255.072	-0.242824	0.237846	-1.02093	0.307287	0.939812	0.0269589	d	0
chr4_5890343_5890343	chr4	5890343	5890343	-	crmp1	nm_001313	2146	70	1253	210	462.911	-0.237679	0.233017	-1.02001	0.307725	0.940469	0.0266557	d	0
chr21_46875423_46875423	chr21	46875423	46875423	+	col18a1	nm_030582	721	16	403	53	136.808	-0.261652	0.256673	-1.0194	0.308013	0.940469	0.0266557	d	0
chr6_33714762_33714762	chr6	33714762	33714762	-	ip6k3	nm_054111	533	23	333	60	127.296	-0.257141	0.25226	-1.01935	0.308037	0.940469	0.0266557	d	0
chr10_103535759_103535759	chr10	103535759	103535759	-	fgf8	nm_006119	1610	48	1046	130	338.524	-0.236768	0.232342	-1.01905	0.308179	0.940479	0.0266511	d	0
chr9_136150630_136150630	chr9	136150630	136150630	-	abo	nm_020469	1696	69	1136	178	400.738	-0.231271	0.22699	-1.01886	0.308269	0.940479	0.0266511	d	0
chr19_1071219_1071219	chr19	1071219	1071219	+	hmha1	nm_001282335	1107	26	692	75	215.304	-0.247766	0.243618	-1.01703	0.30914	0.941479	0.0261891	d	0
chr16_30034654_30034654	chr16	30034654	30034654	+	c16orf92	nm_001109660	999	31	622	87	212.054	-0.246639	0.242595	-1.01667	0.309311	0.941479	0.0261891	d	0
chr17_25745030_25745030	chr17	25745030	25745030	+	tbc1d3p5	nr_033892	661	31	435	77	163.991	-0.249457	0.245399	-1.01654	0.309373	0.941479	0.0261891	d	0
chr11_4660944_4660944	chr11	4660944	4660944	+	or51d1	nm_001004751	778	62	612	126	248.98	-0.237022	0.233276	-1.01605	0.309603	0.941479	0.0261891	d	0
chr20_43743813_43743813	chr20	43743813	43743813	-	wfdc5	nm_145652	759	49	556	108	218.504	-0.239549	0.236076	-1.01471	0.310244	0.941479	0.0261891	d	0
chr14_21491545_21491545	chr14	21491545	21491545	-	mir6717	nr_106774	1661	98	1177	236	463.252	-0.225571	0.222372	-1.01439	0.310397	0.941479	0.0261891	d	0
chr5_7396342_7396342	chr5	7396342	7396342	+	adcy2	nm_020546	1043	76	841	153	319.656	-0.232008	0.22874	-1.01429	0.310446	0.941479	0.0261891	d	0
chr16_46865074_46865074	chr16	46865074	46865074	-	c16orf87	nm_001001436	177	17	157	21	58.2658	-0.274295	0.270453	-1.01421	0.310484	0.941479	0.0261891	d	0
chr2_131674969_131674969	chr2	131674969	131674969	+	arhgef4	nm_032995	1046	41	674	109	242.576	-0.240902	0.237641	-1.01372	0.310716	0.941479	0.0261891	d	0
chr1_40105348_40105348	chr1	40105348	40105348	-	heyl	nm_014571	536	48	476	79	179.207	-0.248321	0.245243	-1.01255	0.311276	0.941479	0.0261891	d	0
chrX_37850069_37850069	chrX	37850069	37850069	+	cxorf27	nm_012274	146	17	133	20	53.2232	-0.275062	0.271736	-1.01224	0.311424	0.941479	0.0261891	d	0
chr20_43937169_43937169	chr20	43937169	43937169	-	matn4	nm_003833	574	20	362	53	126.285	-0.256096	0.253009	-1.0122	0.311443	0.941479	0.0261891	d	0
chr8_117887105_117887105	chr8	117887105	117887105	-	rad21	nm_006265	98	18	108	16	46.5895	-0.276479	0.273286	-1.01168	0.311691	0.941479	0.0261891	d	0
chr7_31092075_31092075	chr7	31092075	31092075	+	adcyap1r1	nm_001118	1858	80	1200	215	449.589	-0.229054	0.226758	-1.01013	0.312435	0.941479	0.0261891	d	0
chr12_113229548_113229548	chr12	113229548	113229548	+	rph3a	nm_001143854	760	70	600	143	263.974	-0.234038	0.231711	-1.01005	0.312474	0.941479	0.0261891	d	0
chr5_152870083_152870083	chr5	152870083	152870083	+	gria1	nr_047578	309	22	228	42	90.7197	-0.261507	0.258916	-1.01	0.312493	0.941479	0.0261891	d	0
chr19_55574585_55574585	chr19	55574585	55574585	-	rdh13	nm_001145971	220	18	187	25	67.3807	-0.269948	0.2675	-1.00915	0.312902	0.941479	0.0261891	d	0
chr4_24797084_24797084	chr4	24797084	24797084	+	sod3	nm_003102	254	21	175	43	80.897	-0.263465	0.261271	-1.0084	0.313263	0.941479	0.0261891	d	0
chr11_74951949_74951949	chr11	74951949	74951949	+	tpbgl	nm_001195528	1726	58	1062	166	377.808	-0.234599	0.232708	-1.00813	0.313394	0.941479	0.0261891	d	0
chr20_61051026_61051026	chr20	61051026	61051026	-	gata5	nm_080473	1843	38	1143	113	345.816	-0.237969	0.236281	-1.00715	0.313865	0.941479	0.0261891	d	0
chr11_17410206_17410206	chr11	17410206	17410206	-	kcnj11	nm_000525	896	32	535	93	200.112	-0.246179	0.244733	-1.00591	0.31446	0.941479	0.0261891	d	0
chr14_61788514_61788514	chr14	61788514	61788514	+	prkch	nm_006255	1227	71	880	167	338.101	-0.228681	0.227355	-1.00583	0.314498	0.941479	0.0261891	d	0
chr4_152330397_152330397	chr4	152330397	152330397	+	fam160a1	nm_001109977	319	24	224	50	97.2474	-0.258225	0.25677	-1.00567	0.314576	0.941479	0.0261891	d	0
chr8_9760839_9760839	chr8	9760839	9760839	-	linc00599	nr_024281	1743	90	1236	218	457.059	-0.224142	0.222902	-1.00556	0.314626	0.941479	0.0261891	d	0
chr8_22941867_22941867	chr8	22941867	22941867	+	loc254896	nr_046173	153	15	121	22	51.1986	-0.272454	0.271028	-1.00526	0.314771	0.941479	0.0261891	d	0
chr20_57425958_57425958	chr20	57425958	57425958	-	gnas-as1	nr_002785	546	29	401	61	142.068	-0.248883	0.247591	-1.00522	0.314792	0.941479	0.0261891	d	0
chr11_58980494_58980494	chr11	58980494	58980494	-	mpeg1	nm_001039396	952	82	806	156	317.976	-0.230981	0.229803	-1.00513	0.314835	0.941479	0.0261891	d	0
chr6_3445247_3445247	chr6	3445247	3445247	-	slc22a23	nm_021945	348	26	248	54	105.935	-0.255568	0.254554	-1.00398	0.315387	0.941479	0.0261891	d	0
chr19_58545433_58545433	chr19	58545433	58545433	+	zscan1	nm_182572	281	15	200	29	71.5679	-0.265662	0.264788	-1.0033	0.315717	0.941479	0.0261891	d	0
chr10_128210010_128210010	chr10	128210010	128210010	-	c10orf90	nm_001004298	517	40	412	76	160.947	-0.245365	0.244623	-1.00303	0.315844	0.941479	0.0261891	d	0
chr3_8775485_8775485	chr3	8775485	8775485	+	cav3	nm_033337	258	16	172	34	70.7622	-0.265085	0.264696	-1.00147	0.3166	0.941479	0.0261891	d	0
chr11_62689012_62689012	chr11	62689012	62689012	-	chrm1	nm_000738	1465	45	875	134	310.075	-0.238139	0.23782	-1.00134	0.316662	0.941479	0.0261891	d	0
chr6_42123143_42123143	chr6	42123143	42123143	+	guca1a	nm_000409	271	23	196	45	87.4511	-0.25979	0.259444	-1.00133	0.316666	0.941479	0.0261891	d	0
chr9_116840752_116840752	chr9	116840752	116840752	-	ambp	nm_001633	977	51	634	133	256.637	-0.235682	0.235377	-1.0013	0.316684	0.941479	0.0261891	d	0
chr3_98451547_98451547	chr3	98451547	98451547	+	st3gal6	nm_006100	311	34	244	63	116.474	-0.252571	0.252457	-1.00045	0.317093	0.941479	0.0261891	d	0
chr8_35092974_35092974	chr8	35092974	35092974	+	unc5d	nm_080872	1169	96	981	188	382.342	-0.225892	0.225933	-0.999817	0.317399	0.941479	0.0261891	d	0
chr12_113573559_113573559	chr12	113573559	113573559	-	rasal1	nm_001193521	1147	41	703	117	256.864	-0.238943	0.239065	-0.999488	0.317558	0.941479	0.0261891	d	0
chr14_101193201_101193201	chr14	101193201	101193201	+	dlk1	nm_003836	1869	57	1123	169	394.782	-0.233773	0.233962	-0.999193	0.317701	0.941479	0.0261891	d	0
chr19_6464259_6464259	chr19	6464259	6464259	+	crb3	nm_174881	1166	47	796	118	274.298	-0.233139	0.233458	-0.998633	0.317972	0.941479	0.0261891	d	0
chr16_30022742_30022742	chr16	30022742	30022742	-	doc2a	nm_001282063	1034	22	668	62	196.547	-0.244624	0.245107	-0.998027	0.318266	0.941479	0.0261891	d	0
chr9_138466770_138466770	chr9	138466770	138466770	+	rp11-98l5.2	nr_034016	413	19	248	51	101.246	-0.257592	0.258105	-0.99801	0.318274	0.941479	0.0261891	d	0
chr1_155006281_155006281	chr1	155006281	155006281	+	dcst1	nm_001143687	529	28	346	69	138.302	-0.248725	0.249256	-0.997868	0.318343	0.941479	0.0261891	d	0
chr22_45680867_45680867	chr22	45680867	45680867	+	upk3a	nm_001167574	1221	63	849	154	319.236	-0.229155	0.229678	-0.997727	0.318412	0.941479	0.0261891	d	0
chr5_170288895_170288895	chr5	170288895	170288895	+	ranbp17	nm_022897	193	17	148	28	61.9401	-0.266679	0.26774	-0.996037	0.319232	0.941479	0.0261891	d	0
chrX_113818550_113818550	chrX	113818550	113818550	+	htr2c	nm_000868	1043	53	733	127	270.316	-0.231698	0.232643	-0.995936	0.319281	0.941479	0.0261891	d	0
chr17_7197876_7197876	chr17	7197876	7197876	-	ybx2	nm_015982	1374	57	912	149	327.447	-0.229576	0.230857	-0.994449	0.320004	0.941479	0.0261891	d	0
chr9_127269699_127269699	chr9	127269699	127269699	-	nr5a1	nm_004959	858	21	554	58	169.393	-0.246097	0.247578	-0.994016	0.320215	0.941479	0.0261891	d	0
chr17_41738931_41738931	chr17	41738931	41738931	-	meox1	nm_004527	578	28	378	70	145.492	-0.246786	0.248347	-0.993713	0.320363	0.941479	0.0261891	d	0
chr5_851101_851101	chr5	851101	851101	-	zdhhc11	nm_024786	629	23	416	58	141.36	-0.247912	0.249496	-0.993652	0.320392	0.941479	0.0261891	d	0
chr19_51568367_51568367	chr19	51568367	51568367	-	klk13	nm_015596	428	27	305	58	120.385	-0.249767	0.25148	-0.993188	0.320618	0.941479	0.0261891	d	0
chr10_5406975_5406975	chr10	5406975	5406975	+	ucn3	nm_053049	1328	103	1029	225	424.659	-0.2204	0.222054	-0.992551	0.320929	0.941479	0.0261891	d	0
chr3_13921618_13921618	chr3	13921618	13921618	-	wnt7a	nm_004625	1696	67	1154	172	397.142	-0.225121	0.226863	-0.99232	0.321041	0.941479	0.0261891	d	0
chr2_74208566_74208566	chr2	74208566	74208566	-	dguok-as1	nr_104029	823	60	611	133	253.24	-0.230524	0.232352	-0.992131	0.321133	0.941479	0.0261891	d	0
chr1_55266941_55266941	chr1	55266941	55266941	-	ttc22	nm_017904	1222	67	884	157	328.622	-0.225905	0.227922	-0.991152	0.321611	0.941479	0.0261891	d	0
chr17_79139306_79139306	chr17	79139306	79139306	+	aatk-as1	nr_027255	1370	31	760	104	261.675	-0.243831	0.246064	-0.990925	0.321722	0.941479	0.0261891	d	0
chr22_45405809_45405809	chr22	45405809	45405809	-	phf21b	nm_001135862	1405	56	1092	120	331.278	-0.226509	0.228651	-0.990632	0.321865	0.941479	0.0261891	d	0
chr1_209957890_209957890	chr1	209957890	209957890	-	c1orf74	nm_152485	160	19	160	20	59.1529	-0.26902	0.271656	-0.990296	0.322029	0.941479	0.0261891	d	0
chr7_128001739_128001739	chr7	128001739	128001739	-	prrt4	nm_001114726	1551	81	1064	204	409.24	-0.223093	0.225303	-0.990191	0.322081	0.941479	0.0261891	d	0
chr11_2466220_2466220	chr11	2466220	2466220	+	kcnq1	nm_000218	1714	48	1059	140	352.566	-0.23233	0.23464	-0.990156	0.322098	0.941479	0.0261891	d	0
chr10_135043777_135043777	chr10	135043777	135043777	+	utf1	nm_003577	1783	44	1117	128	352.851	-0.232081	0.234582	-0.989339	0.322497	0.941479	0.0261891	d	0
chr5_174178736_174178736	chr5	174178736	174178736	+	mir4634	nr_039777	838	65	658	135	265.572	-0.22917	0.231674	-0.989191	0.32257	0.941479	0.0261891	d	0
chr12_113574044_113574044	chr12	113574044	113574044	-	rasal1	nm_001193520	1137	43	701	122	260.596	-0.235593	0.238393	-0.988251	0.32303	0.941479	0.0261891	d	0
chr11_45792982_45792982	chr11	45792982	45792982	+	dkfzp779m0652	nr_027134	941	74	693	168	302.881	-0.225667	0.228418	-0.987958	0.323173	0.941479	0.0261891	d	0
chr6_101846860_101846860	chr6	101846860	101846860	+	grik2	nm_001166247	339	43	296	72	138.354	-0.247184	0.250216	-0.987885	0.323209	0.941479	0.0261891	d	0
chr19_12941489_12941489	chr19	12941489	12941489	-	rtbdn	nm_001270445	982	56	704	131	268.356	-0.229217	0.23206	-0.987746	0.323277	0.941479	0.0261891	d	0
chr18_24445271_24445271	chr18	24445271	24445271	+	aqp4-as1	nr_026908	591	33	397	80	158.845	-0.242275	0.245313	-0.987618	0.32334	0.941479	0.0261891	d	0
chr21_43771208_43771208	chr21	43771208	43771208	-	tff2	nm_005423	571	32	393	75	153.396	-0.242676	0.245745	-0.987512	0.323392	0.941479	0.0261891	d	0
chr9_34523037_34523037	chr9	34523037	34523037	-	enho	nm_198573	997	72	769	155	305.683	-0.225555	0.22844	-0.98737	0.323461	0.941479	0.0261891	d	0
chr1_25943958_25943958	chr1	25943958	25943958	+	man1c1	nm_020379	866	56	580	140	252.276	-0.231689	0.234875	-0.986434	0.32392	0.941479	0.0261891	d	0
chr3_50229042_50229042	chr3	50229042	50229042	+	gnat1	nm_144499	855	27	506	81	182.726	-0.24424	0.24761	-0.986389	0.323942	0.941479	0.0261891	d	0
chr1_165325478_165325478	chr1	165325478	165325478	-	lmx1a	nm_001174069	1480	63	985	165	356.941	-0.226084	0.229236	-0.986251	0.32401	0.941479	0.0261891	d	0
chr11_69931515_69931515	chr11	69931515	69931515	+	ano1	nr_030691	407	16	248	43	93.4678	-0.256469	0.260087	-0.98609	0.324089	0.941479	0.0261891	d	0
chr17_31620006_31620006	chr17	31620006	31620006	-	asic2	nm_183377	1690	95	1191	233	461.779	-0.219738	0.222883	-0.985886	0.324189	0.941479	0.0261891	d	0
chr22_30901698_30901698	chr22	30901698	30901698	-	sec14l4	nm_001161368	1125	54	820	125	284.825	-0.227766	0.231087	-0.985632	0.324314	0.941479	0.0261891	d	0
chr19_52035110_52035110	chr19	52035110	52035110	-	siglec6	nm_001177547	716	47	511	108	208.669	-0.23396	0.237372	-0.985627	0.324316	0.941479	0.0261891	d	0
chr3_46742822_46742822	chr3	46742822	46742822	+	tmie	nm_147196	830	42	541	109	214.802	-0.235438	0.239125	-0.984581	0.32483	0.941479	0.0261891	d	0
chr17_4675186_4675186	chr17	4675186	4675186	+	tm4sf5	nm_003963	478	20	289	55	113.093	-0.251838	0.255849	-0.98432	0.324958	0.941479	0.0261891	d	0
chr10_98480279_98480279	chr10	98480279	98480279	-	pik3ap1	nm_152309	810	53	611	115	235.474	-0.230624	0.234303	-0.984298	0.324969	0.941479	0.0261891	d	0
chr6_168418552_168418552	chr6	168418552	168418552	+	kif25	nm_030615	1694	126	1278	288	532.535	-0.21504	0.218498	-0.984176	0.325029	0.941479	0.0261891	d	0
chr9_129376721_129376721	chr9	129376721	129376721	+	lmx1b	nm_002316	1713	45	1032	136	344.648	-0.232944	0.236739	-0.983972	0.325129	0.941479	0.0261891	d	0
chr19_46001730_46001730	chr19	46001730	46001730	+	ppm1n	nm_001080401	879	31	564	84	195.97	-0.238937	0.242874	-0.983791	0.325218	0.941479	0.0261891	d	0
chr7_127847924_127847924	chr7	127847924	127847924	+	mir129-1	nr_029596	879	43	583	110	224.088	-0.233875	0.237902	-0.983074	0.325571	0.941479	0.0261891	d	0
chr19_19314238_19314238	chr19	19314238	19314238	-	nr2c2ap	nm_176880	302	16	196	37	77.7578	-0.258422	0.263006	-0.982571	0.325819	0.941479	0.0261891	d	0
chr12_119419299_119419299	chr12	119419299	119419299	+	srrm4	nm_194286	594	28	428	62	147.517	-0.242518	0.246911	-0.982208	0.325997	0.941479	0.0261891	d	0
chr2_864112_864112	chr2	864112	864112	-	linc01115	nr_033880	704	38	490	90	186.704	-0.236454	0.240923	-0.981451	0.326371	0.941479	0.0261891	d	0
chr20_36251521_36251521	chr20	36251521	36251521	-	linc00489	nr_047461	1157	93	884	206	377.398	-0.219751	0.223987	-0.981086	0.32655	0.941479	0.0261891	d	0
chr1_13840242_13840242	chr1	13840242	13840242	-	lrrc38	nm_001010847	1237	52	822	136	296.557	-0.228227	0.232675	-0.980883	0.32665	0.941479	0.0261891	d	0
chr3_151158578_151158578	chr3	151158578	151158578	-	igsf10	nm_001178146	209	18	169	28	66.2838	-0.261899	0.267024	-0.980804	0.326689	0.941479	0.0261891	d	0
chr19_18209626_18209626	chr19	18209626	18209626	-	il12rb1	nm_001290024	748	31	497	79	177.311	-0.238516	0.243652	-0.978922	0.327619	0.943496	0.02526	d	0
chr11_110582773_110582773	chr11	110582773	110582773	-	arhgap20	nm_001258415	548	50	474	88	186.523	-0.237383	0.242603	-0.978484	0.327835	0.943788	0.0251254	d	0
chr19_17862285_17862285	chr19	17862285	17862285	+	fcho1	nm_015122	475	26	368	50	124.817	-0.245973	0.251561	-0.977787	0.32818	0.94445	0.0248208	d	0
chr16_77822482_77822482	chr16	77822482	77822482	+	vat1l	nm_020927	1481	121	1265	238	485.478	-0.217342	0.222354	-0.977457	0.328343	0.94449	0.0248027	d	0
chr21_43442112_43442112	chr21	43442112	43442112	+	znf295-as1	nr_027273	474	27	343	58	127.404	-0.244488	0.250227	-0.977063	0.328538	0.94449	0.0248027	d	0
chr1_43766565_43766565	chr1	43766565	43766565	+	tie1	nm_001253357	283	16	172	40	75.4933	-0.257496	0.264082	-0.97506	0.32953	0.945069	0.0245364	d	0
chr17_72920369_72920369	chr17	72920369	72920369	+	otop2	nm_178160	2054	76	1340	207	469.066	-0.220804	0.226574	-0.974534	0.329792	0.945069	0.0245364	d	0
chr20_49348080_49348080	chr20	49348080	49348080	+	pard6b	nm_032521	590	27	393	67	145.184	-0.241657	0.248297	-0.973256	0.330426	0.945069	0.0245364	d	0
chr2_219246751_219246751	chr2	219246751	219246751	+	slc11a1	nm_000578	533	22	380	49	125.187	-0.244759	0.251619	-0.972736	0.330684	0.945069	0.0245364	d	0
chr5_175969511_175969511	chr5	175969511	175969511	+	cdhr2	nm_001171976	456	28	308	66	127.749	-0.243296	0.250391	-0.971664	0.331218	0.945069	0.0245364	d	0
chr17_1090616_1090616	chr17	1090616	1090616	-	abr	nm_001159746	430	23	314	48	111.906	-0.246489	0.253857	-0.970979	0.331559	0.945069	0.0245364	d	0
chr11_117747746_117747746	chr11	117747746	117747746	-	fxyd6	nm_001164836	1730	94	1169	243	466.388	-0.21726	0.22386	-0.970515	0.33179	0.945069	0.0245364	d	0
chr5_145718586_145718586	chr5	145718586	145718586	+	pou4f3	nm_002700	2426	131	1717	326	653.109	-0.211273	0.217786	-0.970094	0.332	0.945069	0.0245364	d	0
chr1_167599473_167599473	chr1	167599473	167599473	+	rcsd1	nm_052862	667	40	488	89	185.544	-0.23302	0.240303	-0.969691	0.332201	0.945069	0.0245364	d	0
chr18_43914186_43914186	chr18	43914186	43914186	+	rnf165	nr_046357	1653	95	1269	213	456.54	-0.214642	0.221362	-0.969638	0.332227	0.945069	0.0245364	d	0
chr1_151483861_151483861	chr1	151483861	151483861	+	cgn	nm_020770	1610	99	1334	201	458.203	-0.216491	0.223273	-0.969625	0.332234	0.945069	0.0245364	d	0
chr3_187009810_187009810	chr3	187009810	187009810	-	masp1	nm_001879	104	19	102	22	50.4908	-0.264194	0.272484	-0.969577	0.332258	0.945069	0.0245364	d	0
chr1_4715104_4715104	chr1	4715104	4715104	+	ajap1	nm_001042478	1472	34	896	104	285.42	-0.232832	0.240143	-0.969557	0.332267	0.945069	0.0245364	d	0
chr6_40555126_40555126	chr6	40555126	40555126	-	lrfn2	nm_020737	1555	82	1020	218	413.291	-0.219953	0.226974	-0.969067	0.332512	0.945069	0.0245364	d	0
chr11_17498392_17498392	chr11	17498392	17498392	-	abcc8	nm_000352	1918	119	1378	289	551.185	-0.212852	0.219653	-0.969039	0.332526	0.945069	0.0245364	d	0
chr6_29973747_29973747	chr6	29973747	29973747	+	hla-j	nr_024240	618	17	394	47	126.231	-0.246093	0.254008	-0.968842	0.332624	0.945069	0.0245364	d	0
chr17_29248753_29248753	chr17	29248753	29248753	+	adap2	nm_018404	962	58	719	130	270.047	-0.224059	0.231384	-0.968343	0.332873	0.945069	0.0245364	d	0
chr12_103351451_103351451	chr12	103351451	103351451	+	ascl1	nm_004316	1724	109	1317	247	498.977	-0.21247	0.219723	-0.966992	0.333548	0.945258	0.0244497	d	0
chr10_83637442_83637442	chr10	83637442	83637442	+	nrg3	nm_001165973	1087	63	801	145	300.179	-0.221764	0.22935	-0.966923	0.333583	0.945258	0.0244497	d	0
chr1_9711789_9711789	chr1	9711789	9711789	+	pik3cd	nm_005026	966	34	679	83	216.223	-0.230396	0.238789	-0.964853	0.334619	0.946658	0.0238069	d	0
chrX_153151628_153151628	chrX	153151628	153151628	-	l1cam	nm_001278116	1114	36	661	109	240.802	-0.233977	0.242505	-0.964835	0.334627	0.946658	0.0238069	d	0
chr16_46782221_46782221	chr16	46782221	46782221	-	mylk3	nm_182493	536	19	311	57	119.365	-0.247352	0.256413	-0.964661	0.334715	0.946658	0.0238069	d	0
chr20_54580528_54580528	chr20	54580528	54580528	-	cbln4	nm_080617	751	25	445	75	163.864	-0.240799	0.24963	-0.964627	0.334732	0.946658	0.0238069	d	0
chr21_40033704_40033704	chr21	40033704	40033704	-	erg	nm_001136154	1099	85	908	171	349.175	-0.219325	0.227438	-0.96433	0.334881	0.946658	0.0238069	d	0
chr19_51071302_51071302	chr19	51071302	51071302	-	lrrc4b	nm_001080457	1174	25	639	88	220.746	-0.241127	0.250284	-0.963411	0.335341	0.947484	0.0234282	d	0
chr20_31592239_31592239	chr20	31592239	31592239	-	sun5	nm_080675	805	51	573	120	231.574	-0.226512	0.235192	-0.963093	0.335501	0.947608	0.0233714	d	0
chr11_67418130_67418130	chr11	67418130	67418130	-	acy3	nm_080658	815	43	577	102	214.786	-0.228407	0.237512	-0.961666	0.336217	0.947873	0.0232497	d	0
chr2_115919683_115919683	chr2	115919683	115919683	+	dpp10	nm_001004360	1045	54	701	139	274.345	-0.223715	0.233397	-0.958517	0.337802	0.947873	0.0232497	d	0
chr1_20878931_20878931	chr1	20878931	20878931	+	fam43b	nm_207334	1341	37	799	114	274.61	-0.230927	0.240962	-0.958355	0.337884	0.947873	0.0232497	d	0
chr4_8873543_8873543	chr4	8873543	8873543	-	hmx1	nm_018942	2282	57	1348	178	451.748	-0.224851	0.234722	-0.957948	0.338089	0.947873	0.0232497	d	0
chr1_55089200_55089200	chr1	55089200	55089200	-	fam151a	nm_176782	641	26	357	81	151.271	-0.241779	0.252424	-0.95783	0.338148	0.947873	0.0232497	d	0
chr1_204165619_204165619	chr1	204165619	204165619	-	kiss1	nm_002256	798	45	514	119	218.07	-0.228874	0.239008	-0.9576	0.338264	0.947873	0.0232497	d	0
chr3_9595486_9595486	chr3	9595486	9595486	-	lhfpl4	nm_198560	1199	62	812	159	315.278	-0.220634	0.230457	-0.957377	0.338377	0.947873	0.0232497	d	0
chr11_61520120_61520120	chr11	61520120	61520120	+	myrf	nm_001127392	709	25	393	80	158.212	-0.241447	0.252431	-0.956488	0.338826	0.947873	0.0232497	d	0
chr1_153651163_153651163	chr1	153651163	153651163	+	npr1	nm_000906	1079	36	735	93	237.186	-0.227137	0.237514	-0.956311	0.338915	0.947873	0.0232497	d	0
chr5_76114832_76114832	chr5	76114832	76114832	+	f2rl1	nm_005242	688	39	472	95	187.334	-0.230492	0.241102	-0.955994	0.339075	0.947873	0.0232497	d	0
chrX_150345055_150345055	chrX	150345055	150345055	+	gpr50	nm_004224	889	35	599	90	207.44	-0.229348	0.240043	-0.955444	0.339353	0.947873	0.0232497	d	0
chr2_232757008_232757008	chr2	232757008	232757008	-	mir1471	nr_031717	1128	83	796	202	353.339	-0.216588	0.226734	-0.95525	0.339451	0.947873	0.0232497	d	0
chr22_42394728_42394728	chr22	42394728	42394728	+	wbp2nl	nm_152613	687	40	469	98	189.575	-0.230017	0.240871	-0.95494	0.339608	0.947873	0.0232497	d	0
chr11_67183148_67183148	chr11	67183148	67183148	+	carns1	nm_001166222	654	15	343	55	125.861	-0.248616	0.260357	-0.954901	0.339628	0.947873	0.0232497	d	0
chr2_240982399_240982399	chr2	240982399	240982399	-	prr21	nm_001080835	706	48	515	109	209.889	-0.226197	0.237002	-0.954412	0.339875	0.947873	0.0232497	d	0
chr1_202612581_202612581	chr1	202612581	202612581	-	syt2	nm_001136504	994	33	719	78	218.478	-0.227602	0.238543	-0.954135	0.340016	0.947873	0.0232497	d	0
chr1_29676626_29676626	chr1	29676626	29676626	-	rp3-437i16.1	nr_110758	923	48	641	118	242.432	-0.224575	0.235381	-0.95409	0.340038	0.947873	0.0232497	d	0
chr1_84768333_84768333	chr1	84768333	84768333	+	samd13	nm_001134664	299	36	269	57	117.417	-0.24349	0.255266	-0.953869	0.34015	0.947873	0.0232497	d	0
chr1_223853436_223853436	chr1	223853436	223853436	-	capn8	nm_001143962	527	53	450	97	190.487	-0.229983	0.241156	-0.95367	0.34025	0.947873	0.0232497	d	0
chr7_50861159_50861159	chr7	50861159	50861159	-	grb10	nm_001001555	185	18	133	34	63.9288	-0.25404	0.26652	-0.953172	0.340503	0.947873	0.0232497	d	0
chr20_22565101_22565101	chr20	22565101	22565101	-	foxa2	nm_021784	1928	51	1267	142	392.516	-0.219751	0.23058	-0.953036	0.340572	0.947873	0.0232497	d	0
chr9_33750463_33750463	chr9	33750463	33750463	+	prss3	nm_001197097	529	18	320	52	116.097	-0.244036	0.256187	-0.952569	0.340809	0.947873	0.0232497	d	0
chr1_36038970_36038970	chr1	36038970	36038970	+	tfap2e	nm_178548	442	28	304	65	125.82	-0.238411	0.250555	-0.951532	0.341334	0.947873	0.0232497	d	0
chr1_155100348_155100348	chr1	155100348	155100348	+	efna1	nm_182685	1892	64	1149	190	416.978	-0.221191	0.232724	-0.950445	0.341886	0.947873	0.0232497	d	0
chr2_130680749_130680749	chr2	130680749	130680749	+	ac079776.3	nr_110285	755	31	575	66	178.787	-0.230411	0.242604	-0.949739	0.342245	0.947873	0.0232497	d	0
chr1_207095378_207095378	chr1	207095378	207095378	-	faim3	nm_001142473	450	34	314	78	140.567	-0.234731	0.2472	-0.949557	0.342338	0.947873	0.0232497	d	0
chr15_40643233_40643233	chr15	40643233	40643233	+	phgr1	nm_001145643	438	26	295	62	120.906	-0.239154	0.25196	-0.949175	0.342531	0.947873	0.0232497	d	0
chr11_130029681_130029681	chr11	130029681	130029681	+	st14	nm_021978	1797	82	1232	212	448.552	-0.212937	0.224523	-0.948397	0.342927	0.947873	0.0232497	d	0
chr20_34995443_34995443	chr20	34995443	34995443	+	dlgap4	nm_014902	1404	69	961	177	361.503	-0.215988	0.227865	-0.947878	0.343192	0.947873	0.0232497	d	0
chr12_50356707_50356707	chr12	50356707	50356707	-	loc101927318	nr_110589	1158	36	708	107	247.538	-0.228354	0.241025	-0.947428	0.343421	0.947873	0.0232497	d	0
chr16_19179637_19179637	chr16	19179637	19179637	+	syt17	nm_016524	1026	45	704	114	250.739	-0.22268	0.235228	-0.946657	0.343814	0.947873	0.0232497	d	0
chr12_50356705_50356705	chr12	50356705	50356705	-	loc101927318	nr_110590	1159	36	709	107	247.706	-0.228086	0.241003	-0.946404	0.343942	0.947873	0.0232497	d	0
chr15_93199031_93199031	chr15	93199031	93199031	-	fam174b	nm_207446	609	39	458	84	174.767	-0.228609	0.241689	-0.945883	0.344208	0.947873	0.0232497	d	0
chrX_69664704_69664704	chrX	69664704	69664704	+	dlg3	nm_021120	867	45	605	110	227.487	-0.223858	0.236667	-0.945878	0.344211	0.947873	0.0232497	d	0
chr17_76227390_76227390	chr17	76227390	76227390	+	tmem235	nm_001204212	1214	55	860	135	301.235	-0.218414	0.230949	-0.945721	0.344291	0.947873	0.0232497	d	0
chr11_124609828_124609828	chr11	124609828	124609828	+	nrgn	nm_006176	1626	105	1195	250	476.908	-0.208876	0.221014	-0.945079	0.344618	0.947873	0.0232497	d	0
chr16_58497993_58497993	chr16	58497993	58497993	+	ndrg4	nm_001130487	1728	48	1096	139	356.466	-0.220806	0.23368	-0.944905	0.344708	0.947873	0.0232497	d	0
chr11_124981604_124981604	chr11	124981604	124981604	-	tmem218	nm_001080546	139	16	110	25	51.6942	-0.255719	0.270685	-0.944711	0.344807	0.947873	0.0232497	d	0
chr19_54385466_54385466	chr19	54385466	54385466	+	prkcg	nm_002739	1431	55	1001	139	332.821	-0.216763	0.229533	-0.944366	0.344983	0.947873	0.0232497	d	0
chr19_51815101_51815101	chr19	51815101	51815101	+	iglon5	nm_001101372	480	26	352	56	126.542	-0.235927	0.250551	-0.941634	0.34638	0.947873	0.0232497	d	0
chr16_11370337_11370337	chr16	11370337	11370337	-	prm2	nm_001286359	698	36	522	79	181.581	-0.227183	0.241291	-0.941534	0.346431	0.947873	0.0232497	d	0
chr10_104597290_104597290	chr10	104597290	104597290	-	cyp17a1	nm_000102	539	36	408	76	157.474	-0.23005	0.244357	-0.941451	0.346474	0.947873	0.0232497	d	0
chr19_18723681_18723681	chr19	18723681	18723681	+	tmem59l	nm_012109	1942	55	1107	177	400.444	-0.223839	0.23799	-0.940541	0.34694	0.947873	0.0232497	d	0
chr11_133902166_133902166	chr11	133902166	133902166	+	rp11-713p17.3	nr_027276	926	59	738	123	266.857	-0.218133	0.232146	-0.939637	0.347404	0.947873	0.0232497	d	0
chr2_77749494_77749494	chr2	77749494	77749494	-	lrrtm4	nm_001282928	178	27	164	39	79.348	-0.248817	0.264836	-0.939515	0.347466	0.947873	0.0232497	d	0
chr2_77749502_77749502	chr2	77749502	77749502	-	lrrtm4	nm_024993	178	27	164	39	79.348	-0.248817	0.264836	-0.939515	0.347466	0.947873	0.0232497	d	0
chr17_41857802_41857802	chr17	41857802	41857802	+	c17orf105	nm_001136483	333	24	249	48	99.6489	-0.240757	0.2564	-0.93899	0.347736	0.947873	0.0232497	d	0
chr11_118842416_118842416	chr11	118842416	118842416	+	foxr1	nm_181721	683	35	505	78	177.214	-0.227064	0.241915	-0.93861	0.347931	0.947873	0.0232497	d	0
chr2_176964529_176964529	chr2	176964529	176964529	+	hoxd12	nm_021193	2344	128	1714	311	635.775	-0.204251	0.217701	-0.93822	0.348131	0.947873	0.0232497	d	0
chr19_10531332_10531332	chr19	10531332	10531332	+	pde4a	nm_001111307	1924	92	1367	230	490.944	-0.208123	0.221971	-0.937617	0.348441	0.947873	0.0232497	d	0
chr13_30510667_30510667	chr13	30510667	30510667	+	linc00544	nr_033889	526	35	375	80	154.137	-0.229559	0.244937	-0.937218	0.348647	0.947873	0.0232497	d	0
chr7_94536948_94536948	chr7	94536948	94536948	+	ppp1r9a	nm_017650	762	65	645	125	253.786	-0.219413	0.234244	-0.936686	0.34892	0.947873	0.0232497	d	0
chr9_111618275_111618275	chr9	111618275	111618275	-	actl7b	nm_006686	327	17	198	45	84.793	-0.245434	0.262056	-0.936569	0.34898	0.947873	0.0232497	d	0
chr7_83278479_83278479	chr7	83278479	83278479	-	sema3e	nm_012431	490	59	440	103	196.695	-0.22665	0.24202	-0.936491	0.349021	0.947873	0.0232497	d	0
chr12_54366909_54366909	chr12	54366909	54366909	+	hoxc11	nm_014212	358	16	239	38	86.4709	-0.244241	0.260874	-0.936242	0.349149	0.947873	0.0232497	d	0
chr10_103986034_103986034	chr10	103986034	103986034	+	elovl3	nm_152310	247	21	173	44	80.6114	-0.244648	0.261325	-0.936183	0.349179	0.947873	0.0232497	d	0
chr1_236305831_236305831	chr1	236305831	236305831	+	gpr137b	nm_003272	472	44	397	81	163.174	-0.229098	0.244738	-0.936093	0.349226	0.947873	0.0232497	d	0
chr21_43823970_43823970	chr21	43823970	43823970	+	ubash3a	nm_018961	625	48	488	100	196.933	-0.223292	0.238576	-0.935934	0.349307	0.947873	0.0232497	d	0
chr22_45405581_45405581	chr22	45405581	45405581	-	phf21b	nm_138415	1373	48	1063	106	310.04	-0.215538	0.230367	-0.93563	0.349464	0.947873	0.0232497	d	0
chr7_22396533_22396533	chr7	22396533	22396533	-	rapgef5	nm_012294	557	36	389	85	161.344	-0.228376	0.24409	-0.935621	0.349468	0.947873	0.0232497	d	0
chr22_32517963_32517963	chr22	32517963	32517963	+	ap1b1p1	nr_040114	443	16	285	42	99.1408	-0.241862	0.258519	-0.935568	0.349496	0.947873	0.0232497	d	0
chr1_50513685_50513685	chr1	50513685	50513685	+	elavl4	nm_001144777	383	30	280	64	120.969	-0.234753	0.250941	-0.935488	0.349537	0.947873	0.0232497	d	0
chr17_70636611_70636611	chr17	70636611	70636611	-	linc00511	nr_033876	537	25	388	56	133.049	-0.233478	0.249654	-0.935208	0.349681	0.947873	0.0232497	d	0
chr1_204654597_204654597	chr1	204654597	204654597	-	lrrn2	nm_201630	1980	108	1333	285	536.982	-0.207911	0.222401	-0.934844	0.349869	0.947873	0.0232497	d	0
chr10_135160843_135160843	chr10	135160843	135160843	+	prap1	nm_145202	790	21	469	66	160.127	-0.23498	0.251419	-0.934617	0.349986	0.947873	0.0232497	d	0
chr19_34112860_34112860	chr19	34112860	34112860	+	chst8	nm_001127895	1878	70	1310	180	432.699	-0.210452	0.225236	-0.934365	0.350115	0.947873	0.0232497	d	0
chr13_25254548_25254548	chr13	25254548	25254548	+	atp12a	nm_001676	1216	67	947	147	329.101	-0.212527	0.227583	-0.933844	0.350384	0.947873	0.0232497	d	0
chr2_175869981_175869981	chr2	175869981	175869981	-	chn1	nm_001822	508	47	462	78	174.054	-0.229795	0.2461	-0.933747	0.350434	0.947873	0.0232497	d	0
chr15_40401085_40401085	chr15	40401085	40401085	-	bmf	nm_001003943	426	18	276	46	101.246	-0.240463	0.257696	-0.933125	0.350755	0.947873	0.0232497	d	0
chr2_7058813_7058813	chr2	7058813	7058813	-	rnf144a-as1	nr_033997	912	57	705	124	260.857	-0.216626	0.232161	-0.933084	0.350776	0.947873	0.0232497	d	0
chr19_6767523_6767523	chr19	6767523	6767523	-	sh2d3a	nm_005490	826	55	671	111	242.629	-0.219007	0.234744	-0.932964	0.350839	0.947873	0.0232497	d	0
chr15_65067770_65067770	chr15	65067770	65067770	-	rbpms2	nm_194272	874	38	561	104	212.93	-0.22448	0.240636	-0.932863	0.35089	0.947873	0.0232497	d	0
chr5_156696361_156696361	chr5	156696361	156696361	+	cyfip2	nm_014376	577	42	402	100	178.225	-0.225173	0.241434	-0.932647	0.351002	0.947873	0.0232497	d	0
chr7_132333552_132333552	chr7	132333552	132333552	+	flj40288	nr_046323	243	23	189	42	83.2263	-0.243403	0.261068	-0.932337	0.351162	0.947873	0.0232497	d	0
chr13_25746421_25746421	chr13	25746421	25746421	-	amer2	nm_152704	1559	107	1196	244	471.328	-0.205446	0.220464	-0.931879	0.351399	0.947873	0.0232497	d	0
chr16_55690351_55690351	chr16	55690351	55690351	+	slc6a2	nm_001043	1905	114	1359	283	539.644	-0.205416	0.220449	-0.931806	0.351437	0.947873	0.0232497	d	0
chr19_34112872_34112872	chr19	34112872	34112872	+	chst8	nm_001127896	1879	70	1312	180	432.954	-0.209852	0.225212	-0.931796	0.351442	0.947873	0.0232497	d	0
chr2_11052062_11052062	chr2	11052062	11052062	+	kcnf1	nm_002236	1578	67	1017	186	382.032	-0.21424	0.230082	-0.931149	0.351776	0.947873	0.0232497	d	0
chr10_98945683_98945683	chr10	98945683	98945683	-	slit1	nm_003061	1649	66	1109	176	390.02	-0.212283	0.228038	-0.930909	0.3519	0.947873	0.0232497	d	0
chr1_204654481_204654481	chr1	204654481	204654481	-	lrrn2	nm_006338	1986	107	1327	285	535.718	-0.207384	0.222855	-0.93058	0.352071	0.947873	0.0232497	d	0
chr10_83635069_83635069	chr10	83635069	83635069	+	nrg3	nm_001010848	1482	78	1075	189	394.175	-0.209124	0.225018	-0.929367	0.352699	0.947873	0.0232497	d	0
chr7_132333447_132333447	chr7	132333447	132333447	-	plxna4	nm_181775	250	23	189	44	84.6959	-0.241885	0.260347	-0.929088	0.352844	0.947873	0.0232497	d	0
chr12_113376248_113376248	chr12	113376248	113376248	+	oas3	nm_006187	279	16	184	37	74.8585	-0.244961	0.263695	-0.928955	0.352912	0.947873	0.0232497	d	0
chrY_2655782_2655782	chrY	2655782	2655782	-	sry	nm_003140	455	46	368	90	165.799	-0.225956	0.243266	-0.928843	0.35297	0.947873	0.0232497	d	0
chr2_26781566_26781566	chr2	26781566	26781566	-	otof	nm_194248	1719	75	1154	200	421.466	-0.21042	0.226619	-0.928521	0.353138	0.947873	0.0232497	d	0
chr8_145701718_145701718	chr8	145701718	145701718	-	foxh1	nm_003923	846	19	500	62	163.082	-0.234119	0.252214	-0.928257	0.353274	0.947873	0.0232497	d	0
chr17_33474835_33474835	chr17	33474835	33474835	+	unc45b	nm_001267052	732	46	502	114	210.666	-0.221221	0.238341	-0.928171	0.353319	0.947873	0.0232497	d	0
chr18_44775554_44775554	chr18	44775554	44775554	-	skor2	nm_001037802	2033	86	1449	216	493.19	-0.206201	0.222172	-0.928114	0.353349	0.947873	0.0232497	d	0
chr19_57352094_57352094	chr19	57352094	57352094	-	peg3	nm_006210	256	17	199	30	72.3672	-0.24552	0.264765	-0.927313	0.353764	0.948297	0.0230558	d	0
chr19_57352097_57352097	chr19	57352097	57352097	-	zim2	nm_001146326	256	17	199	30	72.3672	-0.24552	0.264765	-0.927313	0.353764	0.948297	0.0230558	d	0
chr6_43424370_43424370	chr6	43424370	43424370	-	dlk2	nm_001286655	588	28	415	66	147.712	-0.228735	0.247051	-0.92586	0.354519	0.948843	0.0228055	d	0
chr17_37307902_37307902	chr17	37307902	37307902	-	plxdc1	nm_020405	615	18	380	53	128.71	-0.235026	0.254281	-0.924277	0.355342	0.948843	0.0228055	d	0
chr20_31781410_31781410	chr20	31781410	31781410	+	bpifa4p	nr_026760	854	80	715	160	301.51	-0.212381	0.229786	-0.924255	0.355353	0.948843	0.0228055	d	0
chr6_34482648_34482648	chr6	34482648	34482648	+	pacsin1	nm_001199583	1139	48	765	127	274.72	-0.216037	0.23419	-0.922489	0.356273	0.948843	0.0228055	d	0
chr1_61719190_61719190	chr1	61719190	61719190	-	rp5-833a20.1	nr_104180	100	15	84	21	43.2502	-0.251538	0.272716	-0.922342	0.35635	0.948843	0.0228055	d	0
chr2_10972611_10972611	chr2	10972611	10972611	-	pdia6	nm_001282706	1349	46	808	140	298.828	-0.220117	0.238653	-0.922328	0.356358	0.948843	0.0228055	d	0
chr8_22132809_22132809	chr8	22132809	22132809	+	piwil2	nm_018068	300	22	230	42	90.1687	-0.239035	0.259173	-0.922299	0.356373	0.948843	0.0228055	d	0
chr17_39673469_39673469	chr17	39673469	39673469	-	mir6510	nr_106765	171	15	126	27	55.3487	-0.248355	0.269307	-0.922202	0.356423	0.948843	0.0228055	d	0
chr10_119000583_119000583	chr10	119000583	119000583	+	slc18a2	nm_003054	1431	73	1034	178	375.39	-0.208482	0.226102	-0.922074	0.35649	0.948843	0.0228055	d	0
chr15_40401075_40401075	chr15	40401075	40401075	-	bmf	nm_001003940	424	18	276	46	101.085	-0.237576	0.257696	-0.921925	0.356568	0.948843	0.0228055	d	0
chr21_34442449_34442449	chr21	34442449	34442449	+	olig1	nm_138983	2117	119	1559	288	582.543	-0.201477	0.218596	-0.921685	0.356693	0.948843	0.0228055	d	0
chr6_34113914_34113914	chr6	34113914	34113914	-	grm4	nm_001282847	1122	32	720	92	233.995	-0.221603	0.240761	-0.920431	0.357348	0.948843	0.0228055	d	0
chr4_55991762_55991762	chr4	55991762	55991762	-	kdr	nm_002253	1090	80	872	171	339.192	-0.208378	0.226677	-0.919274	0.357952	0.948843	0.0228055	d	0
chr11_107799276_107799276	chr11	107799276	107799276	+	rab39a	nm_017516	737	54	632	101	226.307	-0.218591	0.237813	-0.91917	0.358007	0.948843	0.0228055	d	0
chr16_28074830_28074830	chr16	28074830	28074830	-	gsg1l	nm_001109763	2085	90	1365	248	509.445	-0.206929	0.225322	-0.918369	0.358426	0.948843	0.0228055	d	0
chr5_1708983_1708983	chr5	1708983	1708983	-	mir4277	nr_036240	626	41	467	91	182.539	-0.220763	0.240482	-0.918003	0.358617	0.948843	0.0228055	d	0
chr4_101596270_101596270	chr4	101596270	101596270	-	linc01216	nr_046811	139	16	131	19	50.8078	-0.249833	0.272183	-0.917886	0.358679	0.948843	0.0228055	d	0
chr11_66313865_66313865	chr11	66313865	66313865	+	actn3	nm_001258371	522	17	303	53	113.28	-0.236707	0.258101	-0.917111	0.359084	0.948843	0.0228055	d	0
chr1_43735664_43735664	chr1	43735664	43735664	+	tmem125	nm_144626	605	32	374	89	160.819	-0.22661	0.247213	-0.916661	0.35932	0.948843	0.0228055	d	0
chr2_115919512_115919512	chr2	115919512	115919512	+	dpp10	nm_001178034	1025	52	694	135	267.864	-0.214407	0.233922	-0.916575	0.359365	0.948843	0.0228055	d	0
chr14_70041600_70041600	chr14	70041600	70041600	-	ccdc177	nm_001271507	1793	77	1287	192	437.847	-0.205169	0.22388	-0.916424	0.359444	0.948843	0.0228055	d	0
chr12_5153084_5153084	chr12	5153084	5153084	+	kcna5	nm_002234	1669	104	1221	252	482.321	-0.202587	0.221226	-0.915745	0.359801	0.948843	0.0228055	d	0
chr20_61408208_61408208	chr20	61408208	61408208	-	linc00659	nr_046225	644	21	364	68	140.116	-0.233051	0.254757	-0.914795	0.360299	0.948843	0.0228055	d	0
chr19_6433790_6433790	chr19	6433790	6433790	-	slc25a41	nm_173637	343	19	230	45	91.3196	-0.236953	0.259146	-0.914362	0.360527	0.948843	0.0228055	d	0
chr7_56184090_56184090	chr7	56184090	56184090	-	nupr1l	nm_001145712	575	19	430	41	125.635	-0.230765	0.252384	-0.91434	0.360538	0.948843	0.0228055	d	0
chr14_24521205_24521205	chr14	24521205	24521205	+	lrrc16b	nm_138360	1032	49	751	117	261.574	-0.213163	0.233191	-0.914115	0.360656	0.948843	0.0228055	d	0
chr15_77924709_77924709	chr15	77924709	77924709	-	lingo1	nm_032808	1487	36	802	127	291.298	-0.225238	0.246502	-0.913738	0.360855	0.948843	0.0228055	d	0
chr15_31393929_31393929	chr15	31393929	31393929	-	trpm1	nm_001252030	374	18	210	54	94.9254	-0.238337	0.260945	-0.913362	0.361052	0.948843	0.0228055	d	0
chr10_105253734_105253734	chr10	105253734	105253734	+	neurl1	nm_004210	1259	73	968	165	349.891	-0.206449	0.226124	-0.912992	0.361247	0.948843	0.0228055	d	0
chr9_34568009_34568009	chr9	34568009	34568009	+	cntfr-as1	nr_024369	1080	71	794	168	319.212	-0.20812	0.228011	-0.912765	0.361366	0.948843	0.0228055	d	0
chrX_153096003_153096003	chrX	153096003	153096003	-	pdzd4	nm_032512	960	20	558	68	181.265	-0.229434	0.251489	-0.912303	0.361609	0.948843	0.0228055	d	0
chr2_27346656_27346656	chr2	27346656	27346656	+	abhd1	nm_032604	431	33	327	69	134.87	-0.226417	0.248194	-0.912257	0.361633	0.948843	0.0228055	d	0
chr20_19265240_19265240	chr20	19265240	19265240	-	rp5-1027g4.3	nr_024564	238	19	176	37	74.5299	-0.240192	0.263394	-0.911912	0.361815	0.948843	0.0228055	d	0
chr5_169455491_169455491	chr5	169455491	169455491	+	mir378e	nr_039609	367	30	280	61	118.322	-0.229445	0.251689	-0.911621	0.361968	0.948843	0.0228055	d	0
chr3_153838999_153838999	chr3	153838999	153838999	-	arhgef26-as1	nr_037901	826	65	675	133	265.181	-0.211709	0.232333	-0.911227	0.362176	0.948843	0.0228055	d	0
chr2_175870107_175870107	chr2	175870107	175870107	-	chn1	nm_001025201	514	50	471	84	181.711	-0.223246	0.245051	-0.911019	0.362286	0.948843	0.0228055	d	0
chr10_129535537_129535537	chr10	129535537	129535537	+	foxi2	nm_207426	1598	51	1087	137	347.972	-0.20998	0.230601	-0.910575	0.362519	0.948843	0.0228055	d	0
chr22_37607005_37607005	chr22	37607005	37607005	-	sstr3	nm_001278687	1287	44	786	132	285.844	-0.217151	0.238515	-0.910429	0.362596	0.948843	0.0228055	d	0
chr22_38219388_38219388	chr22	38219388	38219388	+	galr3	nm_003614	897	36	557	104	211.987	-0.220669	0.242454	-0.910149	0.362744	0.948928	0.0227668	d	0
chr16_10276263_10276263	chr16	10276263	10276263	-	grin2a	nm_001134407	1464	59	1072	143	348.376	-0.207306	0.227928	-0.909527	0.363072	0.94936	0.022569	d	0
chr7_150434435_150434435	chr7	150434435	150434435	+	gimap5	nm_018384	325	24	226	54	99.7163	-0.232954	0.256224	-0.909179	0.363256	0.94936	0.022569	d	0
chr6_44265458_44265458	chr6	44265458	44265458	-	tcte1	nm_182539	1543	83	1120	203	415.472	-0.203739	0.224197	-0.908749	0.363483	0.949411	0.0225456	d	0
chr1_15498120_15498120	chr1	15498120	15498120	-	c1orf195	nm_001278501	265	28	211	52	97.5651	-0.233457	0.257112	-0.907997	0.36388	0.9497	0.0224134	d	0
chr22_46659219_46659219	chr22	46659219	46659219	-	pkdrej	nm_006071	485	33	375	68	142.952	-0.224262	0.247049	-0.907765	0.364002	0.9497	0.0224134	d	0
chr2_30144477_30144477	chr2	30144477	30144477	-	alk	nm_004304	1321	91	1068	195	399.221	-0.203195	0.223911	-0.907481	0.364152	0.9497	0.0224134	d	0
chr4_15376174_15376174	chr4	15376174	15376174	+	c1qtnf7	nm_001135171	185	17	136	32	62.0606	-0.242247	0.267177	-0.90669	0.364571	0.950079	0.0222402	d	0
chr12_111358404_111358404	chr12	111358404	111358404	-	myl2	nm_000432	429	34	317	74	137.325	-0.224346	0.247519	-0.906378	0.364736	0.950208	0.0221814	d	0
chr3_184880688_184880688	chr3	184880688	184880688	+	ehhadh-as1	nr_038990	721	74	644	136	266.393	-0.212622	0.234721	-0.905852	0.365014	0.950599	0.0220024	d	0
chr22_18923964_18923964	chr22	18923964	18923964	-	prodh	nm_001195226	900	31	691	68	201.487	-0.217608	0.240276	-0.905658	0.365117	0.950599	0.0220024	d	0
chr17_4689729_4689729	chr17	4689729	4689729	-	vmo1	nm_001144940	420	17	261	47	98.6836	-0.234136	0.258855	-0.904504	0.365728	0.950748	0.0219345	d	0
chr13_25746305_25746305	chr13	25746305	25746305	-	amer2	nm_199138	1591	107	1212	249	477.565	-0.199125	0.22039	-0.903512	0.366254	0.950748	0.0219345	d	0
chr9_97401923_97401923	chr9	97401923	97401923	-	fbp1	nm_000507	581	31	401	76	154.128	-0.222298	0.246042	-0.903493	0.366264	0.950748	0.0219345	d	0
chr19_7660787_7660787	chr19	7660787	7660787	+	camsap3	nm_001080429	1353	59	941	152	332.089	-0.207314	0.229539	-0.903177	0.366432	0.950748	0.0219345	d	0
chr8_21911080_21911080	chr8	21911080	21911080	+	dmtn	nm_001114137	1695	79	1082	223	428.567	-0.206624	0.228843	-0.902907	0.366575	0.950748	0.0219345	d	0
chr11_119066584_119066584	chr11	119066584	119066584	-	ccdc153	nm_001145018	307	15	199	37	77.198	-0.237798	0.263473	-0.902552	0.366764	0.950748	0.0219345	d	0
chr10_43493010_43493010	chr10	43493010	43493010	+	mir5100	nr_049836	554	33	388	79	154.626	-0.221474	0.245427	-0.902403	0.366843	0.950748	0.0219345	d	0
chr10_95360993_95360993	chr10	95360993	95360993	-	rbp4	nm_006744	860	62	684	132	264.579	-0.209105	0.231817	-0.902027	0.367042	0.950748	0.0219345	d	0
chr3_114012832_114012832	chr3	114012832	114012832	+	tigit	nm_173799	267	32	244	50	104.594	-0.232899	0.258225	-0.90192	0.367099	0.950748	0.0219345	d	0
chr11_117667976_117667976	chr11	117667976	117667976	-	dscaml1	nm_020693	1922	70	1333	184	440.06	-0.203367	0.225495	-0.901867	0.367127	0.950748	0.0219345	d	0
chr8_57124314_57124314	chr8	57124314	57124314	+	chchd7	nm_001011669	358	40	291	77	138.041	-0.223587	0.248022	-0.901481	0.367333	0.950748	0.0219345	d	0
chr2_5832798_5832798	chr2	5832798	5832798	+	sox11	nm_003108	596	23	448	50	137.867	-0.22482	0.24941	-0.901408	0.367371	0.950748	0.0219345	d	0
chr11_60552820_60552820	chr11	60552820	60552820	+	ms4a10	nm_206893	677	25	393	78	154.727	-0.226626	0.251503	-0.901085	0.367543	0.9508	0.0219109	d	0
chr15_41120907_41120907	chr15	41120907	41120907	-	ppp1r14d	nm_017726	705	40	502	96	192.996	-0.216086	0.239924	-0.900644	0.367778	0.9508	0.0219109	d	0
chr6_153452389_153452389	chr6	153452389	153452389	-	rgs17	nm_012419	519	34	378	77	151.252	-0.22097	0.245385	-0.900505	0.367852	0.9508	0.0219109	d	0
chr6_26216872_26216872	chr6	26216872	26216872	-	hist1h2bg	nm_003518	383	24	254	59	109.094	-0.229195	0.254754	-0.899672	0.368295	0.950886	0.0218714	d	0
chr10_46993545_46993545	chr10	46993545	46993545	+	gprin2	nm_014696	2559	90	1609	263	575.699	-0.204319	0.227127	-0.89958	0.368344	0.950886	0.0218714	d	0
chr8_9760982_9760982	chr8	9760982	9760982	-	mir124-1	nr_029668	1760	86	1234	221	454.716	-0.201037	0.223693	-0.898719	0.368802	0.950886	0.0218714	d	0
chr2_177052997_177052997	chr2	177052997	177052997	-	hoxd-as1	nr_110461	864	46	644	106	230.057	-0.211449	0.235448	-0.898068	0.369149	0.950886	0.0218714	d	0
chr11_71134400_71134400	chr11	71134400	71134400	-	flj42102	nr_038862	824	49	617	112	230.87	-0.210946	0.235021	-0.897566	0.369417	0.950886	0.0218714	d	0
chr9_34729535_34729535	chr9	34729535	34729535	-	fam205a	nm_001141917	255	21	192	41	81.5537	-0.234515	0.261301	-0.897491	0.369457	0.950886	0.0218714	d	0
chr2_74741595_74741595	chr2	74741595	74741595	+	tlx2	nm_016170	2049	68	1526	165	456.064	-0.200375	0.223406	-0.896909	0.369767	0.950886	0.0218714	d	0
chr20_44657820_44657820	chr20	44657820	44657820	+	slc12a5	nm_020708	1839	79	1302	202	449.837	-0.200693	0.223923	-0.896257	0.370115	0.950886	0.0218714	d	0
chr18_6929868_6929868	chr18	6929868	6929868	-	linc00668	nr_034100	419	38	367	66	142.151	-0.223365	0.249333	-0.89585	0.370333	0.950886	0.0218714	d	0
chr17_74070881_74070881	chr17	74070881	74070881	+	galr2	nm_003857	1735	45	1139	129	352.577	-0.208652	0.233053	-0.895299	0.370628	0.950886	0.0218714	d	0
chr2_106682112_106682112	chr2	106682112	106682112	+	c2orf40	nm_032411	935	56	702	129	263.489	-0.207588	0.232001	-0.894772	0.370909	0.950886	0.0218714	d	0
chr20_61162118_61162118	chr20	61162118	61162118	+	mir133a2	nr_029676	1060	22	570	82	199.156	-0.226502	0.253333	-0.89409	0.371274	0.950886	0.0218714	d	0
chr17_62009704_62009704	chr17	62009704	62009704	-	cd79b	nm_001039933	715	25	425	77	160.126	-0.223758	0.250362	-0.893741	0.371461	0.950886	0.0218714	d	0
chr3_13114617_13114617	chr3	13114617	13114617	-	iqsec1	nm_001134382	1673	85	1246	204	439.83	-0.199068	0.222799	-0.893487	0.371596	0.950886	0.0218714	d	0
chr19_50836772_50836772	chr19	50836772	50836772	-	kcnc3	nr_110912	1094	34	667	104	235.001	-0.216753	0.242652	-0.893267	0.371714	0.950886	0.0218714	d	0
chr1_153321022_153321022	chr1	153321022	153321022	-	pglyrp4	nm_020393	1239	68	918	162	336.443	-0.203077	0.227407	-0.89301	0.371852	0.950886	0.0218714	d	0
chr5_179499118_179499118	chr5	179499118	179499118	-	rnf130	nm_018434	294	15	194	36	75.2619	-0.235581	0.263828	-0.892936	0.371892	0.950886	0.0218714	d	0
chr4_74606222_74606222	chr4	74606222	74606222	+	il8	nm_000584	113	17	99	24	49.4117	-0.242282	0.271736	-0.891608	0.372603	0.95207	0.0213312	d	0
chr1_1981908_1981908	chr1	1981908	1981908	+	prkcz	nm_002744	1883	37	1133	121	350.565	-0.213316	0.239406	-0.891021	0.372918	0.95207	0.0213312	d	0
chr19_12945390_12945390	chr19	12945390	12945390	-	rtbdn	nm_001270441	1702	83	1218	209	439.542	-0.199324	0.223733	-0.890903	0.372981	0.95207	0.0213312	d	0
chr6_62996100_62996100	chr6	62996100	62996100	-	khdrbs2	nm_152688	710	51	554	110	217.735	-0.210274	0.236083	-0.890679	0.373102	0.95207	0.0213312	d	0
chr9_124329380_124329380	chr9	124329380	124329380	+	dab2ip	nm_032552	339	18	260	35	87.8601	-0.231826	0.260334	-0.890496	0.3732	0.95207	0.0213312	d	0
chrX_16141423_16141423	chrX	16141423	16141423	+	grpr	nm_005314	362	37	331	60	130.48	-0.225058	0.252878	-0.889988	0.373473	0.95207	0.0213312	d	0
chr2_26395959_26395959	chr2	26395959	26395959	+	gareml	nm_001168241	1125	26	721	78	220.64	-0.216429	0.243404	-0.889176	0.373908	0.95207	0.0213312	d	0
chr14_77648101_77648101	chr14	77648101	77648101	+	tmem63c	nm_020431	1304	43	777	134	286.111	-0.213519	0.240156	-0.889084	0.373958	0.95207	0.0213312	d	0
chr3_45927995_45927995	chr3	45927995	45927995	+	ccr9	nm_001256369	714	59	551	130	236.645	-0.207704	0.233702	-0.888755	0.374135	0.95207	0.0213312	d	0
chr4_6383597_6383597	chr4	6383597	6383597	-	ppp2r2c	nm_181876	1084	52	736	137	277.185	-0.207327	0.233481	-0.88798	0.374551	0.952279	0.0212359	d	0
chr1_228613026_228613026	chr1	228613026	228613026	-	hist3h3	nm_003493	227	16	182	27	65.9662	-0.236775	0.266848	-0.887302	0.374917	0.952279	0.0212359	d	0
chr17_30593194_30593194	chr17	30593194	30593194	+	rhbdl3	nm_138328	1598	90	1157	223	440.753	-0.19782	0.223393	-0.885525	0.375874	0.952279	0.0212359	d	0
chr10_91295313_91295313	chr10	91295313	91295313	-	slc16a12	nm_213606	984	70	786	151	301.858	-0.202654	0.228973	-0.885059	0.376125	0.952279	0.0212359	d	0
chr10_82300574_82300574	chr10	82300574	82300574	+	sh2d4b	nm_001145719	542	35	423	73	156.441	-0.216664	0.244808	-0.885037	0.376136	0.952279	0.0212359	d	0
chr5_80256507_80256507	chr5	80256507	80256507	+	rasgrf2	nm_006909	1385	132	1153	280	500.463	-0.19474	0.220084	-0.884844	0.376241	0.952279	0.0212359	d	0
chr1_67773046_67773046	chr1	67773046	67773046	+	il12rb2	nr_047584	805	65	679	129	262.026	-0.206581	0.233566	-0.884467	0.376444	0.952279	0.0212359	d	0
chr21_43636186_43636186	chr21	43636186	43636186	+	abcg1	nm_207629	1194	79	883	189	355.457	-0.199849	0.225977	-0.884377	0.376493	0.952279	0.0212359	d	0
chr11_41481186_41481186	chr11	41481186	41481186	-	lrrc4c	nm_001258419	427	41	376	72	149.97	-0.219161	0.247912	-0.884029	0.376681	0.952279	0.0212359	d	0
chr20_45179213_45179213	chr20	45179213	45179213	-	ocstamp	nm_080721	891	71	689	159	290.756	-0.202581	0.229168	-0.883986	0.376704	0.952279	0.0212359	d	0
chr5_79866304_79866304	chr5	79866304	79866304	-	ankrd34b	nm_001004441	1602	75	1158	187	406.5	-0.198851	0.225025	-0.883686	0.376866	0.952279	0.0212359	d	0
chr4_85419387_85419387	chr4	85419387	85419387	-	nkx6-1	nm_006168	1815	92	1397	214	477.53	-0.195283	0.220994	-0.883658	0.376881	0.952279	0.0212359	d	0
chr8_22133079_22133079	chr8	22133079	22133079	+	piwil2	nm_001135721	295	22	230	42	89.7658	-0.229105	0.259335	-0.883434	0.377002	0.952292	0.0212299	d	0
chr8_134115310_134115310	chr8	134115310	134115310	-	sla	nm_001045557	290	32	245	57	109.703	-0.224496	0.254772	-0.881164	0.378229	0.954022	0.0204416	d	0
chr4_10459032_10459032	chr4	10459032	10459032	-	znf518b	nm_053042	361	31	286	61	119.585	-0.221735	0.25171	-0.880912	0.378365	0.954022	0.0204416	d	0
chr19_55591759_55591759	chr19	55591759	55591759	+	eps8l1	nm_017729	1465	43	887	134	308.672	-0.210368	0.238816	-0.880879	0.378383	0.954022	0.0204416	d	0
chr19_35940616_35940616	chr19	35940616	35940616	+	ffar2	nm_005306	937	49	673	120	248.478	-0.206397	0.234395	-0.88055	0.378561	0.954179	0.0203702	d	0
chr4_154074269_154074269	chr4	154074269	154074269	+	trim2	nm_001130067	446	31	361	60	132.518	-0.2196	0.249743	-0.879305	0.379236	0.954571	0.0201919	d	0
chr1_29138653_29138653	chr1	29138653	29138653	+	oprd1	nm_000911	1946	122	1486	288	566.073	-0.191734	0.218056	-0.879286	0.379246	0.954571	0.0201919	d	0
chr19_55580914_55580914	chr19	55580914	55580914	-	rdh13	nm_138412	781	47	589	107	220.252	-0.207447	0.236086	-0.878694	0.379567	0.954571	0.0201919	d	0
chr11_68451982_68451982	chr11	68451982	68451982	+	gal	nm_015973	2030	68	1298	198	449.604	-0.201578	0.229654	-0.877748	0.38008	0.954571	0.0201919	d	0
chr19_51152701_51152701	chr19	51152701	51152701	+	c19orf81	nm_001195076	531	23	332	65	129.311	-0.221726	0.25262	-0.877702	0.380105	0.954571	0.0201919	d	0
chr19_54784483_54784483	chr19	54784483	54784483	-	lilrb2	nr_103521	431	17	318	37	100.01	-0.225721	0.257524	-0.876505	0.380756	0.954571	0.0201919	d	0
chr15_42867856_42867856	chr15	42867856	42867856	+	stard9	nm_020759	404	31	312	64	126.674	-0.219023	0.249979	-0.876168	0.380939	0.954571	0.0201919	d	0
chr17_48545689_48545689	chr17	48545689	48545689	+	acsf2	nr_110232	989	36	603	109	225.674	-0.212708	0.242783	-0.876125	0.380962	0.954571	0.0201919	d	0
chr19_46171501_46171501	chr19	46171501	46171501	+	gipr	nm_000164	663	20	474	49	141.407	-0.218663	0.249779	-0.875428	0.381341	0.954571	0.0201919	d	0
chr16_755825_755825	chr16	755825	755825	-	fbxl16	nm_153350	2018	43	1141	149	382.164	-0.211164	0.241571	-0.874127	0.382049	0.954571	0.0201919	d	0
chr7_151106246_151106246	chr7	151106246	151106246	+	wdr86-as1	nr_034013	1595	67	1109	176	386.892	-0.198576	0.227176	-0.874105	0.382061	0.954571	0.0201919	d	0
chr16_55690555_55690555	chr16	55690555	55690555	+	slc6a2	nm_001172504	1886	112	1357	282	535.037	-0.192717	0.220548	-0.873812	0.382221	0.954571	0.0201919	d	0
chr7_157367114_157367114	chr7	157367114	157367114	-	mir153-2	nr_029689	265	18	194	37	77.0502	-0.229527	0.262715	-0.873672	0.382297	0.954571	0.0201919	d	0
chr20_1974931_1974931	chr20	1974931	1974931	-	pdyn	nm_001190898	1720	127	1369	286	542.879	-0.190647	0.218261	-0.87348	0.382401	0.954571	0.0201919	d	0
chrX_136648345_136648345	chrX	136648345	136648345	+	zic3	nm_003413	971	28	558	93	203.264	-0.216919	0.248454	-0.873076	0.382622	0.954571	0.0201919	d	0
chr6_167317185_167317185	chr6	167317185	167317185	+	rps6ka2-as1	nr_046644	625	40	502	82	180.21	-0.21071	0.241562	-0.87228	0.383056	0.954571	0.0201919	d	0
chr1_38554902_38554902	chr1	38554902	38554902	+	mir3659	nr_037432	943	70	756	151	295.939	-0.199962	0.229321	-0.871973	0.383223	0.954571	0.0201919	d	0
chr9_36864305_36864305	chr9	36864305	36864305	-	mir4540	nr_039766	966	41	676	105	234.492	-0.206228	0.236763	-0.871032	0.383737	0.954571	0.0201919	d	0
chr9_100263461_100263461	chr9	100263461	100263461	+	tmod1	nm_001166116	1190	71	943	157	336.082	-0.197661	0.227004	-0.870735	0.383899	0.954571	0.0201919	d	0
chr9_33750818_33750818	chr9	33750818	33750818	+	prss3	nm_001197098	523	17	316	52	114.041	-0.223907	0.257283	-0.870273	0.384151	0.954571	0.0201919	d	0
chr11_30038577_30038577	chr11	30038577	30038577	-	kcna4	nm_002233	1146	68	936	144	322.367	-0.198844	0.228531	-0.870098	0.384247	0.954571	0.0201919	d	0
chr9_129724503_129724503	chr9	129724503	129724503	+	ralgps1	nm_001190728	360	34	285	68	126.259	-0.217487	0.250031	-0.869841	0.384387	0.954571	0.0201919	d	0
chr3_140770742_140770742	chr3	140770742	140770742	+	spsb4	nm_080862	1676	114	1314	261	507.307	-0.190704	0.219327	-0.869499	0.384574	0.954571	0.0201919	d	0
chr1_161655042_161655042	chr1	161655042	161655042	-	rpl31p11	nr_002595	389	56	414	80	172.204	-0.219807	0.252818	-0.869427	0.384613	0.954571	0.0201919	d	0
chr5_191625_191625	chr5	191625	191625	+	lrrc14b	nm_001080478	904	17	454	71	165.374	-0.225568	0.259529	-0.869143	0.384769	0.954571	0.0201919	d	0
chr5_132083136_132083136	chr5	132083136	132083136	+	ccni2	nm_001287253	1942	126	1630	267	573.689	-0.190069	0.219294	-0.86673	0.38609	0.955515	0.0197623	d	0
chr20_4702499_4702499	chr20	4702499	4702499	+	prnd	nm_012409	588	41	473	84	176.831	-0.209493	0.241841	-0.866243	0.386357	0.955515	0.0197623	d	0
chr1_202183282_202183282	chr1	202183282	202183282	+	lgr6	nm_001017404	2105	158	1691	356	671.611	-0.186564	0.215426	-0.866021	0.386479	0.955515	0.0197623	d	0
chr7_139528951_139528951	chr7	139528951	139528951	+	tbxas1	nm_001166253	286	22	221	43	88.7089	-0.224563	0.259436	-0.865582	0.38672	0.955515	0.0197623	d	0
chr8_133493004_133493004	chr8	133493004	133493004	-	kcnq3	nm_004519	1692	91	1250	223	457.657	-0.192446	0.222388	-0.865364	0.386839	0.955515	0.0197623	d	0
chr2_231729312_231729312	chr2	231729312	231729312	+	itm2c	nm_001287241	890	45	638	111	232.669	-0.204251	0.236046	-0.865303	0.386873	0.955515	0.0197623	d	0
chr20_33292147_33292147	chr20	33292147	33292147	+	tp53inp2	nm_021202	239	15	172	31	66.6485	-0.230064	0.265952	-0.865057	0.387008	0.955515	0.0197623	d	0
chr19_36157417_36157417	chr19	36157417	36157417	+	upk1a	nm_001281443	432	18	303	43	102.724	-0.222034	0.256765	-0.864735	0.387184	0.955515	0.0197623	d	0
chr1_226129083_226129083	chr1	226129083	226129083	-	lefty2	nm_003240	333	16	224	39	83.6017	-0.226166	0.261567	-0.864658	0.387227	0.955515	0.0197623	d	0
chr14_21493804_21493804	chr14	21493804	21493804	-	ndrg2	nm_001282212	1442	76	1032	192	386.113	-0.19542	0.22608	-0.864387	0.387375	0.955596	0.0197259	d	0
chr9_130890807_130890807	chr9	130890807	130890807	+	ptges2-as1	nr_024425	299	20	200	48	87.7418	-0.224314	0.259881	-0.863142	0.388059	0.956107	0.0194937	d	0
chr16_30023669_30023669	chr16	30023669	30023669	-	doc2a	nm_001282068	835	16	551	48	156.629	-0.216539	0.250901	-0.863048	0.388111	0.956107	0.0194937	d	0
chr19_695461_695461	chr19	695461	695461	-	prss57	nm_214710	487	15	311	43	104.181	-0.222714	0.258281	-0.862295	0.388525	0.956107	0.0194937	d	0
chr4_141348815_141348815	chr4	141348815	141348815	-	clgn	nm_001130675	547	50	466	96	189.367	-0.207624	0.240916	-0.861811	0.388791	0.956107	0.0194937	d	0
chr2_241080073_241080073	chr2	241080073	241080073	-	otos	nm_148961	793	23	495	70	166.894	-0.214598	0.249015	-0.861786	0.388805	0.956107	0.0194937	d	0
chr5_146258490_146258490	chr5	146258490	146258490	-	ppp2r2b	nr_073527	931	70	749	151	294.362	-0.197676	0.229437	-0.861571	0.388923	0.956107	0.0194937	d	0
chr2_166152282_166152282	chr2	166152282	166152282	+	scn2a	nm_001040143	167	22	142	36	69.0649	-0.228916	0.265919	-0.86085	0.389321	0.956107	0.0194937	d	0
chr10_72201465_72201465	chr10	72201465	72201465	-	nodal	nm_018055	1414	52	982	138	325.67	-0.19868	0.230827	-0.860731	0.389386	0.956107	0.0194937	d	0
chr14_94919122_94919122	chr14	94919122	94919122	-	serpina11	nm_001080451	743	68	616	140	260.192	-0.199985	0.232581	-0.859852	0.389871	0.956107	0.0194937	d	0
chr15_75494220_75494220	chr15	75494220	75494220	+	c15orf39	nm_015492	260	16	176	37	72.6302	-0.227125	0.264212	-0.859631	0.389992	0.956107	0.0194937	d	0
chr15_90039844_90039844	chr15	90039844	90039844	-	rhcg	nr_110261	1520	81	1109	201	409.306	-0.193083	0.224625	-0.859578	0.390021	0.956107	0.0194937	d	0
chr2_86094793_86094793	chr2	86094793	86094793	-	st3gal5	nm_001042437	157	17	114	33	58.3396	-0.230524	0.268186	-0.859566	0.390028	0.956107	0.0194937	d	0
chrY_6778726_6778726	chrY	6778726	6778726	+	tbl1y	nm_134259	776	29	488	85	179.051	-0.211356	0.246115	-0.858767	0.390469	0.956107	0.0194937	d	0
chr11_20620945_20620945	chr11	20620945	20620945	+	slc6a5	nm_004211	2082	97	1551	238	529.455	-0.189238	0.220406	-0.858587	0.390568	0.956107	0.0194937	d	0
chr17_45928516_45928516	chr17	45928516	45928516	-	sp6	nm_001258248	1656	114	1329	255	504.286	-0.18853	0.219584	-0.858576	0.390574	0.956107	0.0194937	d	0
chr8_124864226_124864226	chr8	124864226	124864226	+	fer1l6	nm_001039112	351	21	245	49	97.531	-0.220712	0.257217	-0.858077	0.39085	0.956107	0.0194937	d	0
chr19_3786415_3786415	chr19	3786415	3786415	-	matk	nm_139354	1189	24	736	78	224.656	-0.210736	0.245657	-0.857845	0.390978	0.956107	0.0194937	d	0
chr3_123135189_123135189	chr3	123135189	123135189	-	adcy5	nm_001199642	1316	90	1014	209	399.226	-0.191436	0.22332	-0.857226	0.39132	0.956107	0.0194937	d	0
chr18_70211723_70211723	chr18	70211723	70211723	-	cbln2	nm_182511	1206	55	911	130	302.771	-0.196776	0.229902	-0.855915	0.392045	0.956107	0.0194937	d	0
chr17_41739262_41739262	chr17	41739262	41739262	-	meox1	nm_001040002	528	25	346	67	133.643	-0.214656	0.250877	-0.855621	0.392207	0.956107	0.0194937	d	0
chr2_54952148_54952148	chr2	54952148	54952148	+	eml6	nm_001039753	505	51	448	93	184.28	-0.207482	0.242583	-0.855302	0.392384	0.956107	0.0194937	d	0
chr2_219923472_219923472	chr2	219923472	219923472	-	mir3131	nr_036081	2041	40	1217	134	380.177	-0.2046	0.239241	-0.855204	0.392438	0.956107	0.0194937	d	0
chr14_21493935_21493935	chr14	21493935	21493935	-	ndrg2	nm_001282215	1407	73	1003	186	374.376	-0.193718	0.226673	-0.854615	0.392765	0.956107	0.0194937	d	0
chr10_1779670_1779670	chr10	1779670	1779670	-	adarb2	nm_018702	770	40	553	98	203.584	-0.204204	0.238977	-0.854492	0.392832	0.956107	0.0194937	d	0
chr20_1973452_1973452	chr20	1973452	1973452	-	pdyn	nm_001190892	1700	132	1392	290	551.204	-0.186583	0.218449	-0.854127	0.393035	0.956107	0.0194937	d	0
chr5_80256726_80256726	chr5	80256726	80256726	-	loc102524628	nr_105015	1357	124	1132	265	479.791	-0.188574	0.220945	-0.853489	0.393388	0.956107	0.0194937	d	0
chr2_177053300_177053300	chr2	177053300	177053300	-	hoxd-as1	nr_110466	875	45	653	106	230.504	-0.201011	0.235584	-0.853243	0.393525	0.956107	0.0194937	d	0
chr2_88427650_88427650	chr2	88427650	88427650	-	fabp1	nm_001443	851	60	648	138	260.985	-0.197678	0.231783	-0.85286	0.393737	0.956107	0.0194937	d	0
chr3_49907369_49907369	chr3	49907369	49907369	-	camkv	nm_024046	1646	65	1041	191	389.419	-0.197632	0.231873	-0.85233	0.394031	0.956107	0.0194937	d	0
chr3_6847136_6847136	chr3	6847136	6847136	-	ac069277.1	nr_110123	101	15	101	17	43.0013	-0.232637	0.273181	-0.851585	0.394445	0.956107	0.0194937	d	0
chr17_2651476_2651476	chr17	2651476	2651476	-	mir1253	nr_031654	1145	64	861	152	314.476	-0.194644	0.22857	-0.851573	0.394451	0.956107	0.0194937	d	0
chr5_168728133_168728133	chr5	168728133	168728133	-	slit3	nm_003062	216	19	176	33	70.9459	-0.225543	0.265157	-0.850602	0.394991	0.956107	0.0194937	d	0
chr22_23775750_23775750	chr22	23775750	23775750	+	ap000344.3	nr_110538	365	17	224	48	91.4795	-0.221629	0.260577	-0.850531	0.39503	0.956107	0.0194937	d	0
chr1_154377668_154377668	chr1	154377668	154377668	+	il6r	nm_001206866	377	21	270	48	101.352	-0.217795	0.256296	-0.849779	0.395448	0.956107	0.0194937	d	0
chr8_22089851_22089851	chr8	22089851	22089851	-	phyhip	nm_014759	553	23	379	59	132.464	-0.213063	0.25085	-0.849367	0.395677	0.956107	0.0194937	d	0
chr2_177053306_177053306	chr2	177053306	177053306	+	hoxd1	nm_024501	875	45	654	106	230.591	-0.200069	0.23557	-0.849299	0.395715	0.956107	0.0194937	d	0
chr3_42744319_42744319	chr3	42744319	42744319	-	hhatl	nm_020707	676	27	400	84	160.422	-0.212485	0.250215	-0.84921	0.395764	0.956107	0.0194937	d	0
chr9_122131739_122131739	chr9	122131739	122131739	-	brinp1	nm_014618	687	42	556	87	194.625	-0.203567	0.239769	-0.849014	0.395873	0.956107	0.0194937	d	0
chr7_150675402_150675402	chr7	150675402	150675402	-	kcnh2	nm_000238	2000	61	1142	202	426.832	-0.201932	0.237984	-0.848512	0.396153	0.956107	0.0194937	d	0
chr5_11904155_11904155	chr5	11904155	11904155	-	ctnnd2	nm_001332	1338	102	1091	223	428.739	-0.188634	0.222357	-0.848338	0.39625	0.956107	0.0194937	d	0
chr19_6333640_6333640	chr19	6333640	6333640	-	acer1	nm_133492	346	16	261	33	85.1574	-0.221514	0.261151	-0.848221	0.396315	0.956107	0.0194937	d	0
chr3_46619075_46619075	chr3	46619075	46619075	+	tdgf1	nm_003212	510	48	457	86	178.625	-0.206798	0.243843	-0.84808	0.396393	0.956107	0.0194937	d	0
chr11_64358281_64358281	chr11	64358281	64358281	+	slc22a12	nm_144585	819	33	553	89	194.889	-0.205124	0.241885	-0.848022	0.396426	0.956107	0.0194937	d	0
chr2_47797470_47797470	chr2	47797470	47797470	-	kcnk12	nm_022055	2001	87	1379	234	493.885	-0.189805	0.223886	-0.847775	0.396563	0.956107	0.0194937	d	0
chr22_18924066_18924066	chr22	18924066	18924066	-	prodh	nm_016335	876	29	671	66	194.456	-0.204504	0.24124	-0.847722	0.396593	0.956107	0.0194937	d	0
chr17_19437166_19437166	chr17	19437166	19437166	+	slc47a1	nm_018242	984	47	724	114	251.546	-0.198398	0.234079	-0.847566	0.39668	0.956107	0.0194937	d	0
chr14_23846016_23846016	chr14	23846016	23846016	+	cmtm5	nm_001288745	981	42	646	117	239.744	-0.201778	0.238077	-0.847535	0.396697	0.956107	0.0194937	d	0
chr12_54150818_54150818	chr12	54150818	54150818	-	cistr	nr_104332	1284	91	1039	200	395.976	-0.18957	0.223734	-0.847301	0.396827	0.956107	0.0194937	d	0
chr19_55954230_55954230	chr19	55954230	55954230	-	shisa7	nm_001145176	2165	97	1464	266	541.239	-0.189282	0.223477	-0.846988	0.397002	0.956107	0.0194937	d	0
chr19_14139016_14139016	chr19	14139016	14139016	+	rln3	nm_080864	644	23	404	68	146.051	-0.211968	0.250819	-0.845105	0.398052	0.957795	0.0187273	d	0
chr7_44365230_44365230	chr7	44365230	44365230	-	camk2b	nm_001220	1889	52	1058	178	388.683	-0.203476	0.240864	-0.844777	0.398235	0.957955	0.0186548	d	0
chr10_81320163_81320163	chr10	81320163	81320163	-	sftpa2	nm_001098668	383	23	293	48	106.289	-0.215203	0.255039	-0.843805	0.398778	0.958981	0.01819	d	0
chr20_56136136_56136136	chr20	56136136	56136136	+	pck1	nm_002591	1130	75	853	178	337.808	-0.191104	0.226705	-0.842964	0.399249	0.959723	0.0178542	d	0
chr1_6489956_6489956	chr1	6489956	6489956	-	mir4252	nr_036218	709	16	450	50	138.579	-0.213894	0.253819	-0.842703	0.399395	0.959723	0.0178542	d	0
chr17_79762009_79762009	chr17	79762009	79762009	+	gcgr	nm_000160	1883	49	1258	141	385.205	-0.194662	0.231289	-0.841639	0.39999	0.960054	0.0177041	d	0
chr17_8924858_8924858	chr17	8924858	8924858	+	ntn1	nm_004822	1814	72	1248	195	431.378	-0.190438	0.226302	-0.841522	0.400056	0.960054	0.0177041	d	0
chr17_58227301_58227301	chr17	58227301	58227301	+	ca4	nm_000717	1743	77	1262	196	433.45	-0.188611	0.224149	-0.841451	0.400095	0.960054	0.0177041	d	0
chr12_53171129_53171129	chr12	53171129	53171129	-	krt76	nm_015848	1219	106	1059	215	417.635	-0.188764	0.224334	-0.841439	0.400102	0.960054	0.0177041	d	0
chr16_30042186_30042186	chr16	30042186	30042186	-	fam57b	nm_031478	1745	56	1073	173	381.018	-0.197367	0.23486	-0.840361	0.400706	0.960054	0.0177041	d	0
chr7_54610018_54610018	chr7	54610018	54610018	+	vstm2a	nm_182546	1200	105	1023	218	413.1	-0.188089	0.223906	-0.840034	0.400889	0.960054	0.0177041	d	0
chr11_128807729_128807729	chr11	128807729	128807729	-	tp53aip1	nm_001195194	551	25	353	70	137.465	-0.210557	0.250746	-0.839723	0.401064	0.960054	0.0177041	d	0
chr19_36304201_36304201	chr19	36304201	36304201	-	prodh2	nm_021232	668	36	501	83	179.144	-0.20275	0.241516	-0.83949	0.401194	0.960054	0.0177041	d	0
chr20_19193289_19193289	chr20	19193289	19193289	+	slc24a3	nm_020689	1289	71	948	175	352.645	-0.190468	0.226962	-0.839206	0.401354	0.960054	0.0177041	d	0
chr3_133748920_133748920	chr3	133748920	133748920	-	slco2a1	nm_005630	1007	55	713	140	274.006	-0.195438	0.232926	-0.839055	0.401438	0.960054	0.0177041	d	0
chr18_44236996_44236996	chr18	44236996	44236996	-	loxhd1	nm_144612	748	48	541	117	219.161	-0.198533	0.236616	-0.839054	0.401439	0.960054	0.0177041	d	0
chr17_48546227_48546227	chr17	48546227	48546227	-	chad	nm_001267	986	36	606	110	226.146	-0.203634	0.242754	-0.838846	0.401556	0.960054	0.0177041	d	0
chr1_11751678_11751678	chr1	11751678	11751678	-	mad2l2	nm_001127325	1497	65	1111	160	369.476	-0.190082	0.226625	-0.838751	0.401609	0.960054	0.0177041	d	0
chr6_168720434_168720434	chr6	168720434	168720434	-	dact2	nm_001286351	1049	55	759	137	280.041	-0.194526	0.231957	-0.83863	0.401677	0.960054	0.0177041	d	0
chr16_57392694_57392694	chr16	57392694	57392694	+	ccl22	nm_002990	657	38	454	97	182.949	-0.202957	0.242077	-0.838398	0.401807	0.960087	0.0176894	d	0
chr9_129677052_129677052	chr9	129677052	129677052	+	ralgps1	nm_001190730	516	31	394	68	144.658	-0.206682	0.246782	-0.837511	0.402305	0.96044	0.0175299	d	0
chr4_4388689_4388689	chr4	4388689	4388689	+	nsg1	nm_014392	1797	60	1186	172	399.501	-0.192677	0.230165	-0.837125	0.402522	0.960678	0.0174221	d	0
chr2_25264972_25264972	chr2	25264972	25264972	+	efr3b	nm_014971	424	29	325	62	126.065	-0.209388	0.250191	-0.836912	0.402642	0.960686	0.0174186	d	0
chr19_52133727_52133727	chr19	52133727	52133727	-	siglec5	nm_003830	568	42	482	81	175.869	-0.203044	0.243197	-0.834898	0.403775	0.961031	0.0172624	d	0
chr3_46395234_46395234	chr3	46395234	46395234	+	ccr2	nm_001123396	1360	123	1168	256	477.871	-0.184928	0.221527	-0.834785	0.403839	0.961031	0.0172624	d	0
chr2_131513076_131513076	chr2	131513076	131513076	+	amer3	nm_152698	867	49	649	116	238.935	-0.195668	0.234492	-0.834434	0.404036	0.961198	0.017187	d	0
chr9_109363208_109363208	chr9	109363208	109363208	+	mir8081	nr_107048	315	45	306	72	139.74	-0.210638	0.25249	-0.834245	0.404143	0.961198	0.017187	d	0
chr15_32322685_32322685	chr15	32322685	32322685	+	chrna7	nm_001190455	1107	59	728	164	299.135	-0.194514	0.233334	-0.833627	0.404491	0.961749	0.0169384	d	0
chr16_10276611_10276611	chr16	10276611	10276611	-	grin2a	nm_000833	1491	61	1099	152	359.428	-0.189451	0.227465	-0.832879	0.404913	0.962228	0.0167218	d	0
chr5_134914969_134914969	chr5	134914969	134914969	-	cxcl14	nm_004887	1629	106	1277	246	483.71	-0.18335	0.220163	-0.832792	0.404962	0.962228	0.0167218	d	0
chr17_37821598_37821598	chr17	37821598	37821598	+	tcap	nm_003673	1098	20	557	84	199.543	-0.214124	0.257189	-0.832555	0.405096	0.962228	0.0167218	d	0
chr17_47539111_47539111	chr17	47539111	47539111	-	rp11-1079k10.5	nr_110805	1519	110	1170	260	476.755	-0.183366	0.220312	-0.8323	0.40524	0.962228	0.0167218	d	0
chr19_7797057_7797057	chr19	7797057	7797057	-	clec4g	nm_001244856	1177	47	841	121	280.465	-0.19339	0.23288	-0.830426	0.406298	0.963537	0.0161318	d	0
chr11_65558339_65558339	chr11	65558339	65558339	-	ovol1-as1	nr_108085	896	26	528	86	188.987	-0.206505	0.249112	-0.828967	0.407123	0.964197	0.0158344	d	0
chr2_56411257_56411257	chr2	56411257	56411257	+	ccdc85a	nm_001080433	391	22	281	51	106.022	-0.211447	0.255134	-0.828767	0.407236	0.964197	0.0158344	d	0
chr19_35136777_35136777	chr19	35136777	35136777	+	scgb2b3p	nr_045208	176	15	140	26	56.519	-0.223068	0.269243	-0.828501	0.407387	0.964197	0.0158344	d	0
chr6_14117486_14117486	chr6	14117486	14117486	+	cd83	nm_001251901	273	23	235	39	88.2946	-0.216057	0.261051	-0.827645	0.407871	0.964197	0.0158344	d	0
chr1_6479979_6479979	chr1	6479979	6479979	-	hes2	nm_019089	1838	49	1117	157	376.534	-0.195944	0.236817	-0.827407	0.408006	0.964197	0.0158344	d	0
chr9_95709600_95709600	chr9	95709600	95709600	+	fgd3	nm_001083536	812	52	588	128	238.292	-0.194078	0.234799	-0.826568	0.408482	0.964197	0.0158344	d	0
chr11_74862031_74862031	chr11	74862031	74862031	+	slco2b1	nm_007256	1335	69	899	189	355.972	-0.189564	0.229516	-0.825929	0.408844	0.964197	0.0158344	d	0
chr2_242127923_242127923	chr2	242127923	242127923	+	ano7	nm_001001666	775	17	422	65	149.473	-0.212375	0.257768	-0.823902	0.409995	0.964197	0.0158344	d	0
chr1_166944561_166944561	chr1	166944561	166944561	-	ildr2	nm_199351	1449	103	1161	233	449.536	-0.182255	0.221273	-0.823666	0.410129	0.964197	0.0158344	d	0
chr4_819945_819945	chr4	819945	819945	-	cplx1	nm_006651	1648	25	946	94	288.416	-0.203847	0.247553	-0.823448	0.410253	0.964197	0.0158344	d	0
chr2_182545392_182545392	chr2	182545392	182545392	-	neurod1	nm_002500	2156	140	1720	323	641.271	-0.177877	0.216113	-0.823073	0.410467	0.964197	0.0158344	d	0
chr1_35258598_35258598	chr1	35258598	35258598	+	gja4	nm_002060	494	15	317	44	105.721	-0.212254	0.258115	-0.822323	0.410893	0.964197	0.0158344	d	0
chr8_109095913_109095913	chr8	109095913	109095913	-	rspo2	nm_178565	983	74	765	170	313.446	-0.187234	0.227713	-0.822236	0.410943	0.964197	0.0158344	d	0
chr12_122688227_122688227	chr12	122688227	122688227	+	b3gnt4	nm_030765	1012	33	662	96	223.111	-0.198258	0.241152	-0.822129	0.411003	0.964197	0.0158344	d	0
chr10_50818346_50818346	chr10	50818346	50818346	+	slc18a3	nm_003055	2378	70	1560	205	506.099	-0.187323	0.227863	-0.822088	0.411027	0.964197	0.0158344	d	0
chr2_234652661_234652661	chr2	234652661	234652661	-	dnajb3	nm_001001394	410	36	359	65	137.828	-0.205184	0.249684	-0.821775	0.411205	0.964197	0.0158344	d	0
chr12_94955564_94955564	chr12	94955564	94955564	+	mir5700	nr_049885	565	50	520	88	191.902	-0.199817	0.243163	-0.821742	0.411224	0.964197	0.0158344	d	0
chr19_7701986_7701986	chr19	7701986	7701986	+	stxbp2	nm_006949	1029	40	635	122	242.468	-0.197983	0.241184	-0.820879	0.411715	0.964197	0.0158344	d	0
chr11_71293921_71293921	chr11	71293921	71293921	-	krtap5-11	nm_001005405	627	33	499	70	166.107	-0.200086	0.243862	-0.820487	0.411938	0.964197	0.0158344	d	0
chr4_74719012_74719012	chr4	74719012	74719012	+	pf4v1	nm_002620	554	51	437	111	195.42	-0.195386	0.238248	-0.820096	0.412161	0.964197	0.0158344	d	0
chr4_5021197_5021197	chr4	5021197	5021197	-	cytl1	nm_018659	667	39	517	87	185.942	-0.196802	0.240362	-0.818773	0.412916	0.964197	0.0158344	d	0
chr9_120177317_120177317	chr9	120177317	120177317	-	astn2	nm_014010	1646	90	1209	226	450.511	-0.182612	0.223104	-0.818506	0.413068	0.964197	0.0158344	d	0
chr2_131674223_131674223	chr2	131674223	131674223	+	arhgef4	nm_015320	1181	41	750	123	266.417	-0.195298	0.238758	-0.817976	0.413371	0.964197	0.0158344	d	0
chr16_1383605_1383605	chr16	1383605	1383605	+	baiap3	nm_001199099	1896	29	1117	105	333.181	-0.199432	0.24403	-0.817243	0.413789	0.964197	0.0158344	d	0
chr2_150187028_150187028	chr2	150187028	150187028	+	lypd6	nm_194317	447	36	381	68	144.085	-0.2028	0.248189	-0.817118	0.413861	0.964197	0.0158344	d	0
chr14_105635161_105635161	chr14	105635161	105635161	-	jag2	nm_002226	1409	24	779	93	252.924	-0.20479	0.250662	-0.816999	0.413929	0.964197	0.0158344	d	0
chr15_89151337_89151337	chr15	89151337	89151337	+	mir1179	nr_031590	1191	109	1080	212	419.523	-0.184617	0.225986	-0.816939	0.413963	0.964197	0.0158344	d	0
chr20_44098393_44098393	chr20	44098393	44098393	+	wfdc2	nm_006103	1397	97	1169	208	427.379	-0.182237	0.223244	-0.816313	0.414321	0.964197	0.0158344	d	0
chr1_226862769_226862769	chr1	226862769	226862769	-	itpkb-it1	nr_103784	196	21	162	37	72.3735	-0.215939	0.264601	-0.816092	0.414447	0.964197	0.0158344	d	0
chr7_98467673_98467673	chr7	98467673	98467673	-	tmem130	nm_152913	423	15	303	36	95.157	-0.211342	0.259041	-0.815865	0.414577	0.964197	0.0158344	d	0
chr4_15964859_15964859	chr4	15964859	15964859	-	fgfbp2	nm_031950	732	61	643	118	243.128	-0.192179	0.235661	-0.815491	0.414791	0.964197	0.0158344	d	0
chr12_4829751_4829751	chr12	4829751	4829751	+	galnt8	nm_017417	559	49	485	94	189.861	-0.196524	0.241162	-0.814906	0.415126	0.964197	0.0158344	d	0
chr11_64826009_64826009	chr11	64826009	64826009	-	naaladl1	nm_005468	517	21	327	61	123.488	-0.206802	0.253976	-0.81426	0.415496	0.964197	0.0158344	d	0
chr1_165394221_165394221	chr1	165394221	165394221	-	rxrg	nm_001256571	599	67	509	136	236.227	-0.191015	0.234649	-0.814046	0.415619	0.964197	0.0158344	d	0
chr12_57873424_57873424	chr12	57873424	57873424	-	arhgap9	nm_001080157	1109	77	894	171	338.968	-0.18441	0.226556	-0.813971	0.415661	0.964197	0.0158344	d	0
chr19_30017490_30017490	chr19	30017490	30017490	+	vstm2b	nm_001146339	2047	50	1324	152	410.377	-0.18922	0.232628	-0.813401	0.415988	0.964197	0.0158344	d	0
chr20_31805115_31805115	chr20	31805115	31805115	+	bpifa3	nm_001042439	1243	78	918	193	363.043	-0.183862	0.226131	-0.81308	0.416172	0.964197	0.0158344	d	0
chr1_91966403_91966403	chr1	91966403	91966403	+	cdc7	nm_001134419	109	17	103	23	48.9852	-0.221118	0.272135	-0.812533	0.416486	0.964197	0.0158344	d	0
chr17_47651426_47651426	chr17	47651426	47651426	-	rp5-1029k10.2	nr_103773	543	28	335	82	144.357	-0.203342	0.250404	-0.812056	0.416759	0.964197	0.0158344	d	0
chr13_113622952_113622952	chr13	113622952	113622952	-	mcf2l-as1	nr_034002	2026	116	1482	295	567.995	-0.178146	0.219593	-0.811256	0.417219	0.964197	0.0158344	d	0
chr1_207095235_207095235	chr1	207095235	207095235	-	faim3	nm_001193338	439	33	314	79	138.909	-0.200737	0.247618	-0.810673	0.417554	0.964197	0.0158344	d	0
chr1_151688882_151688882	chr1	151688882	151688882	-	celf3	nm_001172649	1823	87	1248	238	469.934	-0.182235	0.224934	-0.810171	0.417842	0.964197	0.0158344	d	0
chr1_166944818_166944818	chr1	166944818	166944818	+	mael	nm_001286378	1462	105	1180	237	456.499	-0.179045	0.221058	-0.809946	0.417971	0.964197	0.0158344	d	0
chr1_111216076_111216076	chr1	111216076	111216076	-	kcna3	nr_109845	1527	107	1325	221	469.578	-0.180085	0.222851	-0.808095	0.419036	0.964197	0.0158344	d	0
chr3_42774066_42774066	chr3	42774066	42774066	+	ccdc13-as1	nr_046732	608	28	390	80	153.483	-0.200658	0.248379	-0.807869	0.419166	0.964197	0.0158344	d	0
chr4_155412930_155412930	chr4	155412930	155412930	-	dchs2	nm_001142553	1514	69	1130	171	382.379	-0.182394	0.225878	-0.80749	0.419384	0.964197	0.0158344	d	0
chr20_56100708_56100708	chr20	56100708	56100708	-	ctcfl	nm_080618	411	18	277	47	100.577	-0.208063	0.257676	-0.807459	0.419402	0.964197	0.0158344	d	0
chr6_31539875_31539875	chr6	31539875	31539875	+	lta	nm_001159740	518	37	396	83	159.13	-0.196589	0.243835	-0.806236	0.420107	0.964197	0.0158344	d	0
chr17_41003200_41003200	chr17	41003200	41003200	+	aoc3	nm_003734	586	35	457	77	164.761	-0.196086	0.243445	-0.805461	0.420554	0.964197	0.0158344	d	0
chr17_61600694_61600694	chr17	61600694	61600694	+	kcnh6	nm_030779	1208	52	757	156	297.61	-0.190603	0.236649	-0.805426	0.420574	0.964197	0.0158344	d	0
chr2_115918920_115918920	chr2	115918920	115918920	-	dpp10-as1	nr_036580	981	42	638	121	240.857	-0.192284	0.238823	-0.80513	0.420745	0.964197	0.0158344	d	0
chr8_4852328_4852328	chr8	4852328	4852328	-	csmd1	nm_033225	1410	62	1007	162	350.634	-0.183847	0.22837	-0.805041	0.420796	0.964197	0.0158344	d	0
chr2_232791038_232791038	chr2	232791038	232791038	-	nppc	nm_024409	2148	81	1361	243	500.892	-0.184509	0.229209	-0.804981	0.420831	0.964197	0.0158344	d	0
chr22_40440820_40440820	chr22	40440820	40440820	+	tnrc6b	nm_001024843	247	29	221	49	96.852	-0.208259	0.258788	-0.804748	0.420965	0.964197	0.0158344	d	0
chr1_11042094_11042094	chr1	11042094	11042094	-	c1orf127	nm_001170754	236	16	179	32	68.6938	-0.213492	0.265355	-0.804552	0.421078	0.964197	0.0158344	d	0
chr2_45169036_45169036	chr2	45169036	45169036	+	six3	nm_005413	1727	41	1049	135	341.908	-0.192375	0.239197	-0.804255	0.42125	0.964197	0.0158344	d	0
chr1_26699266_26699266	chr1	26699266	26699266	-	znf683	nm_001114759	313	16	219	38	81.1015	-0.210669	0.262006	-0.804059	0.421363	0.964197	0.0158344	d	0
chr5_1112172_1112172	chr5	1112172	1112172	-	slc12a7	nm_006598	1040	24	570	90	203.615	-0.202991	0.252527	-0.803841	0.421489	0.964197	0.0158344	d	0
chr6_168377619_168377619	chr6	168377619	168377619	-	hgc6.3	nm_001129895	315	16	213	40	81.6453	-0.210521	0.262075	-0.803285	0.42181	0.964197	0.0158344	d	0
chr12_50451419_50451419	chr12	50451419	50451419	+	asic1	nm_001095	603	23	411	62	140.64	-0.200487	0.249763	-0.802709	0.422143	0.964197	0.0158344	d	0
chr11_10471867_10471867	chr11	10471867	10471867	+	ampd3	nm_001172431	470	31	340	74	138.961	-0.198875	0.247787	-0.802603	0.422204	0.964197	0.0158344	d	0
chr12_1929432_1929432	chr12	1929432	1929432	+	lrtm2	nm_001163926	1848	58	1114	186	401.226	-0.189163	0.235928	-0.801783	0.422678	0.964197	0.0158344	d	0
chr14_96343108_96343108	chr14	96343108	96343108	+	tunar	nr_038861	1784	94	1279	245	481.232	-0.17843	0.222583	-0.801631	0.422766	0.964197	0.0158344	d	0
chr21_40229462_40229462	chr21	40229462	40229462	+	loc101928398	nr_109926	767	39	513	107	202.707	-0.192974	0.240795	-0.801404	0.422898	0.964197	0.0158344	d	0
chr20_44937137_44937137	chr20	44937137	44937137	-	cdh22	nm_021248	2059	87	1447	234	504.485	-0.17875	0.223241	-0.800703	0.423304	0.964197	0.0158344	d	0
chr1_111023387_111023387	chr1	111023387	111023387	+	cymp	nr_003599	545	33	418	74	154.251	-0.196145	0.24505	-0.800428	0.423463	0.964197	0.0158344	d	0
chr11_119234892_119234892	chr11	119234892	119234892	-	usp2	nm_171997	288	19	200	45	84.2728	-0.208629	0.260712	-0.800226	0.42358	0.964197	0.0158344	d	0
chr5_156693186_156693186	chr5	156693186	156693186	+	cyfip2	nm_001037332	753	43	532	110	209.489	-0.190995	0.238718	-0.800089	0.423659	0.964197	0.0158344	d	0
chr6_150326280_150326280	chr6	150326280	150326280	-	raet1k	nr_024045	624	19	396	58	134.317	-0.202452	0.253298	-0.799264	0.424137	0.964197	0.0158344	d	0
chr11_1411128_1411128	chr11	1411128	1411128	+	brsk2	nr_046331	1067	21	610	78	200.171	-0.201366	0.252014	-0.799027	0.424275	0.964197	0.0158344	d	0
chr11_118016184_118016184	chr11	118016184	118016184	-	scn4b	nm_001142349	1521	104	1138	257	465.424	-0.176979	0.221572	-0.798742	0.42444	0.964197	0.0158344	d	0
chr3_47620359_47620359	chr3	47620359	47620359	-	cspg5	nm_001206943	952	38	606	113	227.213	-0.192541	0.241175	-0.798344	0.424671	0.964197	0.0158344	d	0
chr5_146258348_146258348	chr5	146258348	146258348	-	ppp2r2b	nm_181675	944	71	767	156	300.466	-0.18277	0.228945	-0.798311	0.42469	0.964197	0.0158344	d	0
chr20_54823787_54823787	chr20	54823787	54823787	+	mc3r	nm_019888	486	37	411	72	152.878	-0.196649	0.246365	-0.798204	0.424752	0.964197	0.0158344	d	0
chr6_24911398_24911398	chr6	24911398	24911398	-	fam65b	nm_014722	508	45	388	102	176.022	-0.19221	0.240809	-0.798182	0.424765	0.964197	0.0158344	d	0
chr4_183958817_183958817	chr4	183958817	183958817	+	fam92a1p2	nr_003612	604	57	528	111	214.725	-0.18991	0.237979	-0.798008	0.424866	0.964197	0.0158344	d	0
chr12_58013692_58013692	chr12	58013692	58013692	+	slc26a10	nm_133489	909	42	649	108	230.128	-0.189166	0.23708	-0.7979	0.424929	0.964197	0.0158344	d	0
chr20_3687775_3687775	chr20	3687775	3687775	-	siglec1	nm_023068	489	22	341	56	121.412	-0.201581	0.252657	-0.797845	0.424961	0.964197	0.0158344	d	0
chr5_131396346_131396346	chr5	131396346	131396346	+	il3	nm_000588	365	25	261	59	109.478	-0.20263	0.253973	-0.797842	0.424962	0.964197	0.0158344	d	0
chr10_45869623_45869623	chr10	45869623	45869623	+	alox5	nm_001256154	1475	92	1146	218	430.067	-0.177191	0.222273	-0.797174	0.42535	0.964197	0.0158344	d	0
chr1_77333185_77333185	chr1	77333185	77333185	+	st6galnac5	nm_030965	788	73	714	139	278.027	-0.186057	0.233572	-0.796574	0.425698	0.964197	0.0158344	d	0
chr19_52150132_52150132	chr19	52150132	52150132	-	siglec14	nm_001098612	644	45	502	101	196.465	-0.189968	0.238526	-0.796422	0.425787	0.964197	0.0158344	d	0
chr6_134438818_134438818	chr6	134438818	134438818	-	hmga1p7	nr_037938	177	16	150	26	58.6953	-0.214094	0.269044	-0.795757	0.426173	0.964197	0.0158344	d	0
chr20_61732643_61732643	chr20	61732643	61732643	+	har1a	nr_003244	822	22	468	78	169.276	-0.20137	0.25321	-0.795271	0.426456	0.964197	0.0158344	d	0
chr8_28174648_28174648	chr8	28174648	28174648	+	pnoc	nm_006228	1618	119	1321	268	512.533	-0.174321	0.219306	-0.79488	0.426684	0.964197	0.0158344	d	0
chr20_10733737_10733737	chr20	10733737	10733737	+	rp1-278o22.1	nr_110611	197	22	162	40	75.0366	-0.209256	0.263611	-0.793806	0.427308	0.964197	0.0158344	d	0
chr16_3085542_3085542	chr16	3085542	3085542	-	ccdc64b	nm_001103175	1800	53	1130	165	383.123	-0.18618	0.234594	-0.793628	0.427412	0.964197	0.0158344	d	0
chr16_2246465_2246465	chr16	2246465	2246465	-	caskin1	nm_020764	1576	49	1093	136	343.821	-0.18332	0.231135	-0.793129	0.427703	0.964197	0.0158344	d	0
chr14_23904870_23904870	chr14	23904870	23904870	-	myh7	nm_000257	1270	66	851	184	340.614	-0.182936	0.23076	-0.792757	0.427919	0.964197	0.0158344	d	0
chr14_24540555_24540555	chr14	24540555	24540555	+	cpne6	nm_006032	1621	67	1026	201	393.073	-0.184024	0.232217	-0.792464	0.42809	0.964208	0.0158292	d	0
chr2_73520829_73520829	chr2	73520829	73520829	-	egr4	nm_001965	2034	98	1462	257	527.657	-0.175428	0.221432	-0.792241	0.42822	0.964208	0.0158292	d	0
chr1_48688356_48688356	chr1	48688356	48688356	+	slc5a9	nm_001135181	756	47	548	117	219.192	-0.187583	0.236873	-0.791915	0.42841	0.964208	0.0158292	d	0
chr9_130890741_130890741	chr9	130890741	130890741	-	ptges2	nm_198938	263	15	173	38	71.839	-0.209698	0.264834	-0.791809	0.428472	0.964208	0.0158292	d	0
chr16_89007608_89007608	chr16	89007608	89007608	-	cbfa2t3	nm_175931	2065	50	1287	160	412.225	-0.185856	0.235052	-0.790699	0.42912	0.964208	0.0158292	d	0
chr19_8408146_8408146	chr19	8408146	8408146	-	kank3	nm_198471	1169	38	816	104	258.927	-0.186514	0.236138	-0.78985	0.429615	0.964208	0.0158292	d	0
chr2_177042893_177042893	chr2	177042893	177042893	+	loc102800310	nr_110457	1025	76	773	184	326.315	-0.179451	0.227325	-0.789405	0.429875	0.964208	0.0158292	d	0
chr6_31540070_31540070	chr6	31540070	31540070	+	lta	nm_000595	530	36	400	83	159.221	-0.192524	0.243943	-0.789215	0.429986	0.964208	0.0158292	d	0
chr3_153838791_153838791	chr3	153838791	153838791	+	arhgef26	nm_001251962	835	64	694	136	267.696	-0.183002	0.231923	-0.789061	0.430076	0.964208	0.0158292	d	0
chr8_99956630_99956630	chr8	99956630	99956630	+	osr2	nm_001142462	1254	85	999	195	380.463	-0.176792	0.22421	-0.788509	0.430399	0.964208	0.0158292	d	0
chr20_61992748_61992748	chr20	61992748	61992748	-	chrna4	nm_001256573	1587	34	940	118	304.861	-0.191704	0.24316	-0.788384	0.430472	0.964208	0.0158292	d	0
chr6_43265997_43265997	chr6	43265997	43265997	+	slc22a7	nm_153320	992	57	734	141	277.528	-0.182515	0.231577	-0.788143	0.430613	0.964208	0.0158292	d	0
chr18_44337039_44337039	chr18	44337039	44337039	-	st8sia5	nm_013305	1382	81	1093	188	390.904	-0.176547	0.22403	-0.78805	0.430667	0.964208	0.0158292	d	0
chr1_200860626_200860626	chr1	200860626	200860626	+	c1orf106	nm_018265	1331	80	1027	191	381.177	-0.176911	0.224564	-0.787797	0.430816	0.964208	0.0158292	d	0
chr6_26217147_26217147	chr6	26217147	26217147	+	hist1h2ae	nm_021052	385	25	264	63	113.162	-0.199865	0.253724	-0.787727	0.430856	0.964208	0.0158292	d	0
chr18_29006951_29006951	chr18	29006951	29006951	-	rp11-534n16.1	nr_110788	258	30	236	50	100.723	-0.203367	0.258299	-0.787335	0.431086	0.964269	0.0158017	d	0
chr8_67687415_67687415	chr8	67687415	67687415	+	sgk3	nm_170709	291	32	263	55	110.447	-0.20119	0.255699	-0.786823	0.431385	0.964269	0.0158017	d	0
chr2_10220538_10220538	chr2	10220538	10220538	-	cys1	nm_001037160	768	30	567	74	181.535	-0.190489	0.24251	-0.78549	0.432166	0.964269	0.0158017	d	0
chr11_117800168_117800168	chr11	117800168	117800168	-	tmprss13	nm_001244995	993	74	761	176	316.62	-0.178774	0.227674	-0.78522	0.432325	0.964269	0.0158017	d	0
chr19_33716756_33716756	chr19	33716756	33716756	-	slc7a10	nm_019849	1924	69	1229	208	440.8	-0.181138	0.230822	-0.784751	0.4326	0.964269	0.0158017	d	0
chr15_40650433_40650433	chr15	40650433	40650433	+	disp2	nm_033510	545	39	413	90	168.405	-0.190173	0.242371	-0.784636	0.432667	0.964269	0.0158017	d	0
chr12_85306608_85306608	chr12	85306608	85306608	-	slc6a15	nm_182767	1130	82	879	193	355.434	-0.176822	0.225357	-0.784633	0.432669	0.964269	0.0158017	d	0
chr14_90921573_90921573	chr14	90921573	90921573	+	linc00642	nr_033986	624	24	376	76	146.845	-0.197739	0.252064	-0.784477	0.43276	0.964269	0.0158017	d	0
chr3_21792816_21792816	chr3	21792816	21792816	-	znf385d	nm_024697	208	23	188	37	78.0549	-0.207075	0.264035	-0.78427	0.432881	0.964278	0.0157976	d	0
chr3_58223258_58223258	chr3	58223258	58223258	+	abhd6	nm_020676	198	17	166	29	64.3644	-0.209451	0.26727	-0.78367	0.433234	0.964802	0.0155617	d	0
chr9_139553307_139553307	chr9	139553307	139553307	+	egfl7	nr_046367	1113	23	672	80	212.635	-0.194602	0.248419	-0.783361	0.433415	0.964843	0.0155433	d	0
chr9_137979105_137979105	chr9	137979105	137979105	+	olfm1	nm_001282612	1521	31	916	107	288.797	-0.190703	0.24348	-0.783239	0.433487	0.964843	0.0155433	d	0
chr9_137979513_137979513	chr9	137979513	137979513	+	olfm1	nm_001282611	1555	34	936	116	301.028	-0.189771	0.242414	-0.782841	0.433721	0.965102	0.0154268	d	0
chr11_17565963_17565963	chr11	17565963	17565963	-	ush1c	nm_005709	1141	68	825	174	325.873	-0.17918	0.229098	-0.782111	0.434149	0.965171	0.0153958	d	0
chr1_207494816_207494816	chr1	207494816	207494816	+	cd55	nm_001114752	161	20	159	27	63.5398	-0.21066	0.269433	-0.781867	0.434293	0.965171	0.0153958	d	0
chr1_228194722_228194722	chr1	228194722	228194722	+	wnt3a	nm_033131	2306	54	1411	177	455.047	-0.183861	0.235175	-0.781805	0.434329	0.965171	0.0153958	d	0
chr9_100263920_100263920	chr9	100263920	100263920	+	tmod1	nm_003275	1380	85	1105	195	399.855	-0.174679	0.223544	-0.781408	0.434563	0.965171	0.0153958	d	0
chr17_5026397_5026397	chr17	5026397	5026397	-	znf232	nm_014519	793	24	557	65	171.258	-0.191797	0.245492	-0.781277	0.43464	0.965171	0.0153958	d	0
chr7_4998844_4998844	chr7	4998844	4998844	-	mmd2	nm_198403	1053	33	645	106	229.461	-0.190428	0.244027	-0.780359	0.435179	0.965474	0.0152596	d	0
chr14_20665494_20665494	chr14	20665494	20665494	+	or11g2	nm_001005503	374	42	331	78	145.717	-0.193116	0.247742	-0.779504	0.435683	0.965545	0.0152275	d	0
chr13_113656027_113656027	chr13	113656027	113656027	+	mcf2l	nm_024979	1569	39	915	135	315.049	-0.189205	0.242754	-0.77941	0.435738	0.965545	0.0152275	d	0
chr6_29942891_29942891	chr6	29942891	29942891	+	hcg9	nr_028032	573	37	430	87	168.336	-0.189053	0.242671	-0.779051	0.43595	0.965545	0.0152275	d	0
chr19_7852369_7852369	chr19	7852369	7852369	+	clec4gp1	nr_002931	1136	25	659	90	220.332	-0.194209	0.249304	-0.779004	0.435977	0.965545	0.0152275	d	0
chr2_131513223_131513223	chr2	131513223	131513223	+	amer3	nm_001105193	861	47	646	114	234.836	-0.183051	0.235114	-0.778561	0.436239	0.965545	0.0152275	d	0
chr19_46418036_46418036	chr19	46418036	46418036	-	nanos2	nm_001029861	685	27	497	68	162.356	-0.191095	0.245453	-0.778538	0.436252	0.965545	0.0152275	d	0
chr1_151688792_151688792	chr1	151688792	151688792	-	celf3	nm_001172648	1819	85	1239	237	465.927	-0.175532	0.22569	-0.777755	0.436714	0.965851	0.01509	d	0
chr14_90085494_90085494	chr14	90085494	90085494	-	foxn3	nm_001085471	198	18	154	35	67.2594	-0.206462	0.265625	-0.777266	0.437002	0.965851	0.01509	d	0
chr8_134072603_134072603	chr8	134072603	134072603	-	sla	nm_006748	261	16	188	36	73.3038	-0.204769	0.263926	-0.775855	0.437835	0.965851	0.01509	d	0
chr21_43735706_43735706	chr21	43735706	43735706	-	tff3	nm_003226	952	46	712	113	246.244	-0.181878	0.234502	-0.775592	0.43799	0.965851	0.01509	d	0
chr14_104552022_104552022	chr14	104552022	104552022	+	aspg	nm_001080464	1153	33	759	99	244.285	-0.18623	0.240177	-0.775386	0.438112	0.965851	0.01509	d	0
chr1_35247910_35247910	chr1	35247910	35247910	+	gjb3	nm_001005752	797	37	509	109	203.233	-0.18822	0.242753	-0.775354	0.43813	0.965851	0.01509	d	0
chr21_40177230_40177230	chr21	40177230	40177230	+	ets2	nm_001256295	285	17	184	45	80.1883	-0.203607	0.262714	-0.775014	0.438332	0.965851	0.01509	d	0
chr16_31494438_31494438	chr16	31494438	31494438	+	slc5a2	nm_003041	392	15	270	39	91.1411	-0.201579	0.260158	-0.774833	0.438439	0.965851	0.01509	d	0
chr20_13220334_13220334	chr20	13220334	13220334	-	ism1-as1	nr_040043	131	16	117	24	51.2068	-0.210024	0.271189	-0.774455	0.438662	0.965851	0.01509	d	0
chr18_35146000_35146000	chr18	35146000	35146000	-	celf4	nm_020180	1460	90	1233	194	423.125	-0.173253	0.223745	-0.774332	0.438734	0.965851	0.01509	d	0
chr19_45663408_45663408	chr19	45663408	45663408	-	nkpd1	nm_198478	1055	22	589	84	201.315	-0.195467	0.252866	-0.773007	0.439518	0.965851	0.01509	d	0
chr5_140306301_140306301	chr5	140306301	140306301	+	pcdhac1	nm_018898	779	53	632	116	235.258	-0.181213	0.234554	-0.772587	0.439767	0.965851	0.01509	d	0
chr19_49259343_49259343	chr19	49259343	49259343	+	fgf21	nm_019113	634	23	455	59	145.615	-0.192054	0.248602	-0.772537	0.439796	0.965851	0.01509	d	0
chr1_154540256_154540256	chr1	154540256	154540256	+	chrnb2	nm_000748	1172	84	924	196	366.547	-0.173616	0.224761	-0.772448	0.439849	0.965851	0.01509	d	0
chr2_45169017_45169017	chr2	45169017	45169017	-	six3-as1	nr_103786	1722	41	1053	136	342.307	-0.184754	0.23919	-0.772418	0.439867	0.965851	0.01509	d	0
chr4_185940082_185940082	chr4	185940082	185940082	+	helt	nm_001029887	2277	63	1557	181	478.263	-0.175429	0.227237	-0.772009	0.440109	0.965851	0.01509	d	0
chr11_71955220_71955220	chr11	71955220	71955220	-	phox2a	nm_005169	1652	75	1171	201	418.001	-0.174256	0.225722	-0.771994	0.440118	0.965851	0.01509	d	0
chr11_278569_278569	chr11	278569	278569	+	nlrp6	nm_138329	1520	43	1036	124	321.562	-0.18036	0.233704	-0.771747	0.440264	0.965851	0.01509	d	0
chr13_58205788_58205788	chr13	58205788	58205788	+	pcdh17	nm_001040429	1959	100	1478	250	522.286	-0.17014	0.220492	-0.771637	0.440329	0.965851	0.01509	d	0
chr5_178422124_178422124	chr5	178422124	178422124	-	grm6	nm_000843	957	21	565	75	186.026	-0.194032	0.251519	-0.771443	0.440444	0.965851	0.01509	d	0
chr14_57277194_57277194	chr14	57277194	57277194	-	otx2	nm_001270523	1830	95	1450	224	491.558	-0.170006	0.220444	-0.771196	0.440591	0.965851	0.01509	d	0
chr14_77965210_77965210	chr14	77965210	77965210	-	ism2	nm_199296	789	31	548	84	187.323	-0.187133	0.242653	-0.771195	0.440591	0.965851	0.01509	d	0
chr21_40032591_40032591	chr21	40032591	40032591	-	erg	nm_001243428	1101	86	939	182	358.243	-0.174669	0.226619	-0.770762	0.440848	0.965851	0.01509	d	0
chr16_14109875_14109875	chr16	14109875	14109875	-	loc101927311	nr_110909	242	16	170	37	70.6567	-0.203919	0.264669	-0.770469	0.441022	0.965851	0.01509	d	0
chr19_54761167_54761167	chr19	54761167	54761167	-	lilrb5	nm_006840	918	36	618	102	218.09	-0.184988	0.240193	-0.770165	0.441202	0.965851	0.01509	d	0
chr11_35551848_35551848	chr11	35551848	35551848	-	pamr1	nm_001282675	188	28	182	43	84.7577	-0.202885	0.26344	-0.770139	0.441217	0.965851	0.01509	d	0
chr5_137419773_137419773	chr5	137419773	137419773	+	wnt8a	nm_058244	254	26	242	40	91.4988	-0.201481	0.261744	-0.769763	0.44144	0.965851	0.01509	d	0
chr17_72733355_72733355	chr17	72733355	72733355	+	rab37	nm_001163990	1715	62	1096	188	394.742	-0.17893	0.232478	-0.769663	0.4415	0.965851	0.01509	d	0
chr1_209796855_209796855	chr1	209796855	209796855	-	mir4260	nr_036213	399	15	250	45	92.6787	-0.200734	0.260866	-0.769491	0.441602	0.965851	0.01509	d	0
chr4_155412877_155412877	chr4	155412877	155412877	-	dchs2	nm_001142552	1515	67	1125	170	379.123	-0.17424	0.226479	-0.769343	0.44169	0.965851	0.01509	d	0
chr5_126366500_126366500	chr5	126366500	126366500	-	march3	nm_178450	250	19	206	35	77.2059	-0.202426	0.263272	-0.768887	0.441961	0.965851	0.01509	d	0
chr21_45682099_45682099	chr21	45682099	45682099	-	dnmt3l	nm_013369	696	22	464	64	152.435	-0.191557	0.249241	-0.768563	0.442153	0.965851	0.01509	d	0
chr17_77770915_77770915	chr17	77770915	77770915	-	cbx8	nm_020649	741	20	515	56	154.436	-0.190779	0.248698	-0.767112	0.443015	0.967455	0.0143694	d	0
chr11_43602943_43602943	chr11	43602943	43602943	+	mir129-2	nr_029697	1800	69	1270	188	425.325	-0.173227	0.226245	-0.765661	0.443878	0.967798	0.0142151	d	0
chr3_138665982_138665982	chr3	138665982	138665982	-	foxl2	nm_023067	1925	73	1384	195	453.4	-0.171782	0.224578	-0.764912	0.444324	0.968247	0.0140139	d	0
chr3_37493812_37493812	chr3	37493812	37493812	+	itga9	nm_002207	1050	62	832	143	297.77	-0.175401	0.229365	-0.764722	0.444437	0.968247	0.0140139	d	0
chr6_166075588_166075588	chr6	166075588	166075588	-	pde10a	nm_001130690	1490	46	1010	133	324.626	-0.178375	0.233409	-0.764214	0.44474	0.968537	0.0138839	d	0
chrX_71130937_71130937	chrX	71130937	71130937	+	nhsl2	nm_001013627	785	38	591	92	202.94	-0.182519	0.238891	-0.764023	0.444853	0.968537	0.0138839	d	0
chr16_85784689_85784689	chr16	85784689	85784689	-	c16orf74	nm_206967	615	15	382	50	123.853	-0.195858	0.256903	-0.762384	0.445831	0.970055	0.0132037	d	0
chr16_67001377_67001377	chr16	67001377	67001377	+	ces3	nm_001185176	879	34	565	102	207.88	-0.185237	0.242985	-0.76234	0.445857	0.970055	0.0132037	d	0
chr2_5831250_5831250	chr2	5831250	5831250	-	ac108025.2	nr_110580	565	28	482	54	146.264	-0.189459	0.248706	-0.761778	0.446193	0.970102	0.0131827	d	0
chr6_142623055_142623055	chr6	142623055	142623055	+	gpr126	nm_020455	188	22	193	29	72.0326	-0.204159	0.268112	-0.761471	0.446376	0.970102	0.0131827	d	0
chr3_196065291_196065291	chr3	196065291	196065291	-	tm4sf19	nm_138461	282	20	194	49	86.3016	-0.198094	0.260181	-0.761373	0.446434	0.970102	0.0131827	d	0
chr2_177042857_177042857	chr2	177042857	177042857	-	hoxd-as1	nr_110468	1028	74	773	182	323.203	-0.173226	0.227755	-0.760583	0.446906	0.970102	0.0131827	d	0
chr16_58497548_58497548	chr16	58497548	58497548	+	ndrg4	nm_020465	1606	42	1056	128	330.822	-0.179006	0.235388	-0.760471	0.446973	0.970102	0.0131827	d	0
chr1_85462796_85462796	chr1	85462796	85462796	-	mcoln2	nm_153259	886	70	800	136	288.389	-0.176888	0.23266	-0.760287	0.447083	0.970102	0.0131827	d	0
chr9_136522530_136522530	chr9	136522530	136522530	-	dbh-as1	nr_102735	1866	57	1104	190	402.392	-0.180629	0.237723	-0.759828	0.447357	0.970102	0.0131827	d	0
chr6_34524110_34524110	chr6	34524110	34524110	-	spdef	nm_012391	468	19	299	56	112.387	-0.194457	0.25616	-0.759123	0.447779	0.970102	0.0131827	d	0
chr7_49813256_49813256	chr7	49813256	49813256	+	vwc2	nm_198570	1364	38	919	112	287.24	-0.179482	0.236447	-0.759078	0.447806	0.970102	0.0131827	d	0
chr13_100634025_100634025	chr13	100634025	100634025	+	zic2	nm_007129	1700	49	1243	130	364.169	-0.17372	0.228915	-0.758883	0.447923	0.970102	0.0131827	d	0
chr1_91966664_91966664	chr1	91966664	91966664	+	cdc7	nm_001134420	100	15	93	21	44.0345	-0.206852	0.272749	-0.758395	0.448215	0.970102	0.0131827	d	0
chr17_72429835_72429835	chr17	72429835	72429835	+	gprc5c	nm_018653	1172	27	662	100	230.47	-0.189424	0.249786	-0.758346	0.448244	0.970102	0.0131827	d	0
chr11_125773116_125773116	chr11	125773116	125773116	-	pus3	nm_031307	841	64	727	131	268.791	-0.176668	0.233059	-0.758039	0.448428	0.970102	0.0131827	d	0
chrX_137794268_137794268	chrX	137794268	137794268	+	fgf13-as1	nr_038405	638	38	500	86	180.446	-0.182725	0.24107	-0.757974	0.448467	0.970102	0.0131827	d	0
chr8_50824338_50824338	chr8	50824338	50824338	+	sntg1	nm_018967	1075	68	855	157	315.472	-0.172751	0.227993	-0.757703	0.448629	0.970102	0.0131827	d	0
chr20_61809851_61809851	chr20	61809851	61809851	+	mir124-3	nr_029670	2208	35	1370	121	394.962	-0.181033	0.239055	-0.757288	0.448877	0.970102	0.0131827	d	0
chr17_75724641_75724641	chr17	75724641	75724641	-	loc100132174	nr_104134	1208	70	903	175	340.972	-0.172213	0.227455	-0.757132	0.448971	0.970102	0.0131827	d	0
chr16_20364200_20364200	chr16	20364200	20364200	-	umod	nm_001278614	192	18	142	38	67.0883	-0.200703	0.26544	-0.756115	0.44958	0.97067	0.0129283	d	0
chr4_11430537_11430537	chr4	11430537	11430537	-	hs3st1	nm_005114	731	45	578	102	210.552	-0.179241	0.237161	-0.755778	0.449782	0.97067	0.0129283	d	0
chr14_104605059_104605059	chr14	104605059	104605059	+	kif26a	nm_015656	1676	25	994	94	294.855	-0.186253	0.246492	-0.755617	0.449879	0.97067	0.0129283	d	0
chr5_134871639_134871639	chr5	134871639	134871639	-	neurog1	nm_006161	2093	105	1558	269	554.78	-0.165793	0.219919	-0.753882	0.45092	0.971943	0.0123594	d	0
chr1_110993787_110993787	chr1	110993787	110993787	+	prok1	nm_032414	1341	126	1169	267	485.08	-0.166673	0.221201	-0.753489	0.451156	0.971943	0.0123594	d	0
chr1_24645811_24645811	chr1	24645811	24645811	+	grhl3	nm_198174	932	58	678	148	272.206	-0.175039	0.232403	-0.753174	0.451346	0.971943	0.0123594	d	0
chr2_96781888_96781888	chr2	96781888	96781888	-	adra2b	nm_000682	1516	30	858	113	284.832	-0.186428	0.24758	-0.752999	0.451451	0.971943	0.0123594	d	0
chr15_69606741_69606741	chr15	69606741	69606741	+	paqr5	nm_001104554	412	16	239	53	97.6139	-0.196709	0.261266	-0.752907	0.451506	0.971943	0.0123594	d	0
chr5_149546343_149546343	chr5	149546343	149546343	+	cdx1	nm_001804	238	15	164	36	68.1345	-0.199883	0.265566	-0.752669	0.451649	0.971943	0.0123594	d	0
chr12_56473891_56473891	chr12	56473891	56473891	+	erbb3	nm_001005915	455	19	307	52	110.225	-0.192528	0.255888	-0.752394	0.451814	0.971943	0.0123594	d	0
chr19_55660606_55660606	chr19	55660606	55660606	-	tnnt1	nm_001126132	1244	55	841	156	311.504	-0.175103	0.232834	-0.75205	0.452021	0.971943	0.0123594	d	0
chr1_149154987_149154987	chr1	149154987	149154987	-	nbpf23p	nr_103751	755	49	704	88	222.025	-0.18048	0.240489	-0.750472	0.45297	0.973088	0.0118479	d	0
chr16_3149318_3149318	chr16	3149318	3149318	-	zscan10	nm_001282416	912	52	721	120	254.319	-0.17477	0.232909	-0.750378	0.453027	0.973088	0.0118479	d	0
chr18_28681550_28681550	chr18	28681550	28681550	+	rp11-408h20.2	nr_110785	915	46	666	118	241.517	-0.176631	0.235522	-0.749955	0.453282	0.973088	0.0118479	d	0
chr10_99609994_99609994	chr10	99609994	99609994	+	golga7b	nm_001010917	1306	85	1004	207	390.522	-0.168073	0.224118	-0.74993	0.453297	0.973088	0.0118479	d	0
chr22_23229959_23229959	chr22	23229959	23229959	+	igll5	nm_001256296	893	63	713	144	276.423	-0.172747	0.230549	-0.749285	0.453686	0.973088	0.0118479	d	0
chr11_75236599_75236599	chr11	75236599	75236599	-	gdpd5	nm_030792	317	17	241	37	84.1126	-0.195503	0.261035	-0.748952	0.453886	0.973088	0.0118479	d	0
chr19_8212385_8212385	chr19	8212385	8212385	-	fbn3	nm_032447	1582	46	1017	143	337.178	-0.176425	0.235836	-0.748082	0.454411	0.973088	0.0118479	d	0
chr4_37246689_37246689	chr4	37246689	37246689	+	nwd2	nm_001144990	1386	62	964	171	349.028	-0.171799	0.229664	-0.748043	0.454434	0.973088	0.0118479	d	0
chr3_46759373_46759373	chr3	46759373	46759373	-	prss50	nm_013270	928	55	713	132	264.017	-0.17356	0.232071	-0.747874	0.454536	0.973088	0.0118479	d	0
chr17_36831187_36831187	chr17	36831187	36831187	-	c17orf96	nm_001130677	769	30	571	75	182.417	-0.181293	0.24244	-0.747786	0.454589	0.973088	0.0118479	d	0
chr17_21308447_21308447	chr17	21308447	21308447	+	kcnj18	nm_001194958	446	15	238	56	100.401	-0.196621	0.263265	-0.746855	0.455151	0.973784	0.0115373	d	0
chr6_109245306_109245306	chr6	109245306	109245306	-	armc2-as1	nr_104137	293	23	208	55	94.7973	-0.191921	0.257549	-0.745183	0.456161	0.974239	0.0113345	d	0
[truncated: 6,223 more rows]

## Sheet: TSS_for_Deseq2
	Chromosome	Start	End	Strand	Gene Name	Acc#	K27me3_d0New	K27me3_d0	K27me3_d10New	K27me3_d10
chr1_27998724_27998724	chr1	27998724	27998724	-	ifi6	nm_022873	84	3	60	18
chr1_27998724_27998724	chr1	27998724	27998724	-	ifi6	nm_022872	84	3	60	18
chr2_190526124_190526124	chr2	190526124	190526124	+	asnsd1	nm_019048	110	9	142	30
chr13_76112008_76112008	chr13	76112008	76112008	-	commd6	nm_203495	50	1	67	11
chr15_50838902_50838902	chr15	50838902	50838902	-	usp50	nm_203494	200	21	339	99
chr6_31588449_31588449	chr6	31588449	31588449	+	prrc2a	nm_080686	47	2	29	4
chr5_145895676_145895676	chr5	145895676	145895676	-	gpr151	nm_194251	116	14	158	39
chr2_185463092_185463092	chr2	185463092	185463092	+	znf804a	nm_194250	642	59	725	152
chr2_26781566_26781566	chr2	26781566	26781566	-	otof	nm_194248	1719	75	1154	200
chr3_32148002_32148002	chr3	32148002	32148002	+	gpd1l	nm_015141	168	4	80	18
chr2_178077421_178077421	chr2	178077421	178077421	+	hnrnpa3	nm_194247	31	2	32	8
chr19_17375544_17375544	chr19	17375544	17375544	-	ushbp1	nm_031941	151	3	128	17
chr5_68667280_68667280	chr5	68667280	68667280	+	rad17	nm_133339	50	1	37	7
chr9_100069909_100069909	chr9	100069909	100069909	+	ccdc180	nm_020893	243	22	299	62
chr13_77601331_77601331	chr13	77601331	77601331	-	fbxl3	nm_012158	46	1	55	9
chr20_34742661_34742661	chr20	34742661	34742661	+	epb41l1	nm_012156	165	6	106	14
chr13_28195915_28195915	chr13	28195915	28195915	+	polr1d	nm_015972	63	2	39	8
chr17_33448630_33448630	chr17	33448630	33448630	+	fndc8	nm_017559	257	17	226	49
chr10_180404_180404	chr10	180404	180404	+	zmynd11	nm_006624	48	0	38	10
chr12_63328665_63328665	chr12	63328665	63328665	-	ppm1h	nm_020700	89	4	92	21
chr17_45908992_45908992	chr17	45908992	45908992	+	lrrc46	nm_033413	62	4	71	18
chr20_749228_749228	chr20	749228	749228	-	slc52a3	nm_033409	549	29	524	90
chr13_45150701_45150701	chr13	45150701	45150701	-	tsc22d1	nm_001243799	55	6	44	9
chr13_45048437_45048437	chr13	45048437	45048437	-	tsc22d1	nm_001243798	51	7	59	10
chr13_45011390_45011390	chr13	45011390	45011390	-	tsc22d1	nm_001243797	48	2	46	6
chr14_77608134_77608134	chr14	77608134	77608134	-	zdhhc22	nm_174976	1973	98	1472	255
chr1_150480486_150480486	chr1	150480486	150480486	+	ecm1	nm_022664	91	4	65	10
chrX_83757487_83757487	chrX	83757487	83757487	-	hdx	nm_144657	65	2	61	14
chr1_236445339_236445339	chr1	236445339	236445339	-	ero1lb	nm_019891	554	40	644	142
chr10_135207620_135207620	chr10	135207620	135207620	+	mtg1	nm_138384	43	2	29	4
chr1_109825790_109825790	chr1	109825790	109825790	-	psrc1	nm_032636	55	4	38	7
chr19_22019010_22019010	chr19	22019010	22019010	-	znf43	nm_001256654	35	1	34	9
chr1_31769828_31769828	chr1	31769828	31769828	+	zcchc17	nm_001282569	66	6	35	7
chr1_31769828_31769828	chr1	31769828	31769828	+	zcchc17	nm_001282570	66	6	35	7
chr1_31769828_31769828	chr1	31769828	31769828	+	zcchc17	nm_001282567	66	6	35	7
chr1_31769828_31769828	chr1	31769828	31769828	+	zcchc17	nm_001282566	66	6	35	7
chr6_167370077_167370077	chr6	167370077	167370077	-	rnaset2	nm_003730	105	3	54	16
chr20_32308136_32308136	chr20	32308136	32308136	-	pxmp4	nm_007238	70	5	34	5
chr2_70995375_70995375	chr2	70995375	70995375	-	add2	nm_001617	1353	79	1300	254
chr2_136594750_136594750	chr2	136594750	136594750	-	lct	nm_002299	49	2	40	9
chr3_50126340_50126340	chr3	50126340	50126340	+	rbm5	nm_005778	46	5	30	3
chr1_226112040_226112040	chr1	226112040	226112040	-	pycr2	nm_013328	41	2	29	0
chr18_21083433_21083433	chr18	21083433	21083433	+	c18orf8	nm_013326	89	8	91	24
chr9_33290417_33290417	chr9	33290417	33290417	+	nfx1	nm_147133	44	3	33	7
chr2_179672150_179672150	chr2	179672150	179672150	-	ttn	nm_133437	114	9	122	28
chr16_46918307_46918307	chr16	46918307	46918307	+	gpt2	nm_133443	138	10	224	50
chr12_75603528_75603528	chr12	75603528	75603528	-	kcnc2	nm_153748	1210	55	958	166
chr15_80351909_80351909	chr15	80351909	80351909	+	zfand6	nm_001242918	410	29	477	98
chr2_18770846_18770846	chr2	18770846	18770846	-	nt5c1b	nm_001199086	86	2	102	26
chr16_15228007_15228007	chr16	15228007	15228007	-	mir6511b-1	nr_106775	1	0	1	0
chr14_21491545_21491545	chr14	21491545	21491545	-	mir6717	nr_106774	1661	98	1177	236
chr4_95679127_95679127	chr4	95679127	95679127	+	bmpr1b	nm_001203	204	23	243	58
chr12_113573559_113573559	chr12	113573559	113573559	-	rasal1	nm_001193521	1147	41	703	117
chr12_113574044_113574044	chr12	113574044	113574044	-	rasal1	nm_001193520	1137	43	701	122
chr20_13220334_13220334	chr20	13220334	13220334	-	ism1-as1	nr_040043	131	16	117	24
chr19_47163620_47163620	chr19	47163620	47163620	+	dact3-as1	nr_040042	496	17	400	49
chr10_47243511_47243511	chr10	47243511	47243511	-	bms1p2	nr_072978	0	0	0	0
chr10_48185838_48185838	chr10	48185838	48185838	+	bms1p2	nr_072978	1	0	0	0
chr19_30016659_30016659	chr19	30016659	30016659	-	loc284395	nr_040029	2054	70	1348	179
chr19_37288464_37288464	chr19	37288464	37288464	+	znf790-as1	nr_040028	45	3	35	1
chr19_37288451_37288451	chr19	37288451	37288451	+	znf790-as1	nr_040027	46	3	35	1
chr18_53804767_53804767	chr18	53804767	53804767	-	rp11-456o19.4	nr_040026	90	6	109	29
chr18_53804767_53804767	chr18	53804767	53804767	-	rp11-456o19.4	nr_040025	90	6	109	29
chr16_30205163_30205163	chr16	30205163	30205163	+	slx1a	nm_001014999	0	0	0	0
chr10_4868368_4868368	chr10	4868368	4868368	+	akr1e2	nm_001040177	70	6	41	10
chrX_102943086_102943086	chrX	102943086	102943086	-	morf4l2	nm_001142432	27	6	19	1
chr7_99063824_99063824	chr7	99063824	99063824	-	atp5j2	nm_001003714	91	4	48	7
chr15_23034427_23034427	chr15	23034427	23034427	-	nipa2	nm_001008892	58	5	71	13
chr1_108992903_108992903	chr1	108992903	108992903	+	nbpf6	nm_001143988	2	0	10	0
chr3_142838617_142838617	chr3	142838617	142838617	+	chst2	nm_004267	182	11	131	27
chr11_61595504_61595504	chr11	61595504	61595504	+	fads2	nm_004265	95	4	37	8
chr2_219283837_219283837	chr2	219283837	219283837	+	vil1	nm_007127	678	26	443	87
chr5_64064754_64064754	chr5	64064754	64064754	+	cwc27	nm_005869	64	4	41	12
chr2_73928467_73928467	chr2	73928467	73928467	-	nat8b	nm_016347	397	19	282	49
chr17_38334241_38334241	chr17	38334241	38334241	+	rapgefl1	nm_016339	67	2	41	6
chr3_12200851_12200851	chr3	12200851	12200851	-	timp4	nm_003256	251	15	158	30
chr15_41694658_41694658	chr15	41694658	41694658	-	ndufaf1	nm_016013	39	3	26	3
chr7_4998844_4998844	chr7	4998844	4998844	-	mmd2	nm_198403	1053	33	645	106
chr6_144185572_144185572	chr6	144185572	144185572	+	zc2hc1b	nm_001013623	64	11	85	14
chr12_38710556_38710556	chr12	38710556	38710556	+	alg10b	nm_001013620	54	5	97	10
chr7_130353598_130353598	chr7	130353598	130353598	-	copg2	nm_001290033	90	9	103	16
chr9_35812259_35812259	chr9	35812259	35812259	-	spag8	nm_001039592	66	5	58	8
chr4_159093718_159093718	chr4	159093718	159093718	-	fam198b	nm_016613	74	6	104	28
chr8_23386362_23386362	chr8	23386362	23386362	+	slc25a37	nm_016612	60	2	47	8
chr14_75745480_75745480	chr14	75745480	75745480	+	fos	nm_005252	49	3	42	5
chr14_29236277_29236277	chr14	29236277	29236277	+	foxg1	nm_005249	1732	94	1531	286
chr1_27961727_27961727	chr1	27961727	27961727	-	fgr	nm_005248	446	16	193	34
chr6_5261183_5261183	chr6	5261183	5261183	-	lyrm4	nm_001164841	42	3	44	9
chr3_66271167_66271167	chr3	66271167	66271167	+	slc25a26	nm_001164796	55	4	71	10
chr6_34113914_34113914	chr6	34113914	34113914	-	grm4	nm_001282847	1122	32	720	92
chr1_110198697_110198697	chr1	110198697	110198697	+	gstm4	nr_024538	172	12	128	26
chr5_63986134_63986134	chr5	63986134	63986134	+	fam159b	nm_001164442	1219	101	1122	260
chr3_171561138_171561138	chr3	171561138	171561138	+	tmem212	nm_001164436	65	5	84	24
chr19_48216600_48216600	chr19	48216600	48216600	+	ehd2	nm_014601	63	5	57	9
chr17_56160779_56160779	chr17	56160779	56160779	+	dynll2	nm_080677	165	15	177	46
chr20_13976145_13976145	chr20	13976145	13976145	+	macrod2	nm_080676	125	13	143	27
chr1_204338847_204338847	chr1	204338847	204338847	-	linc00628	nr_027022	1215	94	1030	238
chr2_132250385_132250385	chr2	132250385	132250385	+	loc150776	nr_026922	28	0	13	1
chr10_51827563_51827563	chr10	51827563	51827563	-	flj31813	nr_038275	11	0	6	0
chr6_31895253_31895253	chr6	31895253	31895253	+	c2	nm_001282459	171	7	193	45
chr20_18548072_18548072	chr20	18548072	18548072	+	linc00493	nr_015432	51	4	48	8
chr4_122085495_122085495	chr4	122085495	122085495	-	tnip3	nm_024873	144	7	153	36
chr5_176936858_176936858	chr5	176936858	176936858	-	dok3	nm_024872	72	2	45	9
chr8_68864602_68864602	chr8	68864602	68864602	+	prex2	nm_024870	909	83	1306	277
chr15_43213007_43213007	chr15	43213007	43213007	-	ttbk2	nm_173500	71	8	56	12
chr22_31477281_31477281	chr22	31477281	31477281	+	smtn	nm_134269	83	6	43	11
chr1_152483319_152483319	chr1	152483319	152483319	+	lce5a	nm_178438	832	77	856	186
chr19_36157417_36157417	chr19	36157417	36157417	+	upk1a	nm_001281443	432	18	303	43
chr20_30060816_30060816	chr20	30060816	30060816	-	defb124	nm_001037500	165	8	112	18
chr1_66258192_66258192	chr1	66258192	66258192	+	pde4b	nm_001037341	106	8	101	27
chr9_130966662_130966662	chr9	130966662	130966662	-	ciz1	nm_001131015	441	20	402	69
chr11_113185250_113185250	chr11	113185250	113185250	+	ttc12	nm_017868	114	9	92	19
chr12_21679255_21679255	chr12	21679255	21679255	+	c12orf39	nm_030572	192	20	226	39
chr15_63413998_63413998	chr15	63413998	63413998	+	lactb	nm_032857	58	3	51	7
chr15_51630795_51630795	chr15	51630795	51630795	-	cyp19a1	nm_031226	698	55	458	98
chrX_52112077_52112077	chrX	52112077	52112077	+	xage2	nm_130777	0	0	0	0
chrX_52387096_52387096	chrX	52387096	52387096	-	xage2	nm_130777	0	0	0	0
chrX_52841227_52841227	chrX	52841227	52841227	+	xage5	nm_130775	178	8	224	35
chr3_183770834_183770834	chr3	183770834	183770834	+	htr3c	nm_130770	867	56	841	184
chr11_64703360_64703360	chr11	64703360	64703360	-	gpha2	nm_130769	145	8	179	43
chr7_117067577_117067577	chr7	117067577	117067577	-	asz1	nm_130768	317	26	471	104
chr12_90049844_90049844	chr12	90049844	90049844	-	atp2b1	nm_001001323	67	3	90	12
chr8_102217960_102217960	chr8	102217960	102217960	-	znf706	nm_001042510	57	6	62	12
chr7_132261323_132261323	chr7	132261323	132261323	-	plxna4	nm_001105543	265	14	376	90
chr2_219524263_219524263	chr2	219524263	219524263	-	znf142	nm_001105537	81	11	39	12
chr4_42659122_42659122	chr4	42659122	42659122	-	atp8a1	nm_001105529	235	24	297	66
chr7_12726451_12726451	chr7	12726451	12726451	+	arl4a	nm_212460	55	8	75	11
chr6_13295818_13295818	chr6	13295818	13295818	-	rp1-257a7.4	nm_001242698	63	2	62	12
chr3_129116191_129116191	chr3	129116191	129116191	-	snora7b	nr_002992	69	1	42	8
chr7_2281895_2281895	chr7	2281895	2281895	+	nudt1	nm_198950	54	0	33	6
chr1_31441084_31441084	chr1	31441084	31441084	-	snord85	nr_003066	60	3	54	19
chr18_56940625_56940625	chr18	56940625	56940625	-	rax	nm_013435	2258	113	1981	377
chr2_95963071_95963071	chr2	95963071	95963071	+	kcnip3	nm_013434	1177	55	582	110
chr22_39152024_39152024	chr22	39152024	39152024	-	sun2	nm_015374	68	2	38	9
chr17_7387568_7387568	chr17	7387568	7387568	-	zbtb4	nm_020899	34	0	32	6
chr9_90340973_90340973	chr9	90340973	90340973	+	ctsl	nm_145918	62	4	40	3
chr19_10362639_10362639	chr19	10362639	10362639	+	mrpl4	nm_146387	42	3	19	2
chr10_5855512_5855512	chr10	5855512	5855512	-	gdi2	nm_001115156	54	5	53	14
chr17_72588370_72588370	chr17	72588370	72588370	-	cd300ld	nm_001115152	409	28	279	61
chr2_71205574_71205574	chr2	71205574	71205574	+	ankrd53	nm_001115116	67	3	47	12
chr3_189507448_189507448	chr3	189507448	189507448	+	tp63	nm_001114982	72	5	126	30
chr6_48036425_48036425	chr6	48036425	48036425	-	ptchd4	nm_001013732	456	45	439	105
chr1_93427079_93427079	chr1	93427079	93427079	-	fam69a	nm_001252273	87	3	120	27
chr7_92465941_92465941	chr7	92465941	92465941	-	cdk6	nm_001145306	58	3	102	23
chr6_44191362_44191362	chr6	44191362	44191362	+	slc29a1	nm_001078177	131	5	82	9
chr2_231729664_231729664	chr2	231729664	231729664	+	itm2c	nm_001012516	773	35	573	101
chr6_10747991_10747991	chr6	10747991	10747991	+	tmem14b	nm_001286489	58	4	56	14
chr16_325943_325943	chr16	325943	325943	-	rgs11	nm_001286485	667	10	313	28
chr12_48963829_48963829	chr12	48963829	48963829	-	lalba	nm_002289	385	42	509	126
chr19_55014012_55014012	chr19	55014012	55014012	+	lair2	nm_002288	125	7	107	15
chr19_54876721_54876721	chr19	54876721	54876721	-	lair1	nm_002287	207	17	214	37
chr16_30087383_30087383	chr16	30087383	30087383	+	ppp4c	nm_002720	53	2	39	6
chr21_47878861_47878861	chr21	47878861	47878861	+	dip2a	nm_015151	51	3	30	5
chr22_39077953_39077953	chr22	39077953	39077953	+	tomm22	nm_020243	54	3	46	5
chr1_201951765_201951765	chr1	201951765	201951765	+	rnpep	nm_020216	61	4	69	11
chr4_187476537_187476537	chr4	187476537	187476537	-	mtnr1a	nm_005958	722	53	610	116
chr21_41029246_41029246	chr21	41029246	41029246	+	b3galt5	nm_006057	161	8	140	22
chr6_105585049_105585049	chr6	105585049	105585049	-	bves	nm_001199563	92	6	111	19
chr12_52761309_52761309	chr12	52761309	52761309	-	krt85	nm_002283	704	39	592	143
chr4_139936912_139936912	chr4	139936912	139936912	+	ccrn4l	nm_012118	52	3	25	1
chr17_39623638_39623638	chr17	39623638	39623638	-	krt32	nm_002278	284	15	177	34
chr17_39553844_39553844	chr17	39553844	39553844	-	krt31	nm_002277	125	6	159	25
chr17_39684641_39684641	chr17	39684641	39684641	-	krt19	nm_002276	184	7	283	41
chr2_47797470_47797470	chr2	47797470	47797470	-	kcnk12	nm_022055	2001	87	1379	234
chr15_43877090_43877090	chr15	43877090	43877090	-	ppip5k1	nm_014659	0	0	1	0
chr18_29671817_29671817	chr18	29671817	29671817	+	rnf138	nm_016271	51	3	66	9
chr2_26256728_26256728	chr2	26256728	26256728	+	rab10	nm_016131	56	8	38	9
chr5_179233387_179233387	chr5	179233387	179233387	+	sqstm1	nm_001142298	53	2	29	3
chr15_32933869_32933869	chr15	32933869	32933869	+	scg5	nm_001144757	81	8	57	15
chr4_72904848_72904848	chr4	72904848	72904848	+	npffr2	nm_001144756	235	22	464	69
chr17_27045286_27045286	chr17	27045286	27045286	-	rab34	nm_001142625	55	3	34	8
chr17_27045286_27045286	chr17	27045286	27045286	-	rab34	nm_001142624	55	3	34	8
chr9_133814455_133814455	chr9	133814455	133814455	-	fibcd1	nm_001145106	1124	30	906	124
chr2_231902280_231902280	chr2	231902280	231902280	+	c2orf72	nm_001144994	1279	66	1007	192
chr3_40518603_40518603	chr3	40518603	40518603	+	znf619	nm_001145093	66	3	66	22
chr22_19109967_19109967	chr22	19109967	19109967	-	dgcr2	nm_001173533	129	6	99	14
chr1_193029003_193029003	chr1	193029003	193029003	+	trove2	nm_001173525	48	2	45	10
chr7_128355395_128355395	chr7	128355395	128355395	+	fam71f1	nm_032599	283	18	197	50
chrX_102565974_102565974	chrX	102565974	102565974	-	bex2	nm_032621	431	25	461	103
chr22_22988781_22988781	chr22	22988781	22988781	+	ggtlc2	nm_199127	6	0	7	0
chr3_42132745_42132745	chr3	42132745	42132745	+	trak1	nm_001042646	67	9	53	10
chr3_121553926_121553926	chr3	121553926	121553926	-	iqcb1	nm_001023571	161	17	220	36
chr12_21168629_21168629	chr12	21168629	21168629	+	slco1b7	nm_001009562	76	2	109	25
chr9_129089122_129089122	chr9	129089122	129089122	+	mvb12b	nm_001011703	118	7	76	15
chr10_105110891_105110891	chr10	105110891	105110891	-	pcgf6	nm_001011663	37	4	39	4
chr10_44880545_44880545	chr10	44880545	44880545	-	cxcl12	nm_001033886	148	4	132	17
chr12_51663994_51663994	chr12	51663994	51663994	-	smagp	nm_001033873	52	1	43	5
chr19_17448325_17448325	chr19	17448325	17448325	+	gtpbp3	nm_001128855	58	2	22	7
chr1_167599473_167599473	chr1	167599473	167599473	+	rcsd1	nm_052862	667	40	488	89
chr14_90420901_90420901	chr14	90420901	90420901	-	efcab11	nm_001284269	64	4	68	12
chr3_118753676_118753676	chr3	118753676	118753676	-	igsf11	nm_001015887	1228	129	1617	338
chr5_68856073_68856073	chr5	68856073	68856073	+	gtf2h2d	nm_001042490	3	0	2	0
chr19_51529872_51529872	chr19	51529872	51529872	-	klk11	nm_001136032	711	31	377	55
chr3_11314009_11314009	chr3	11314009	11314009	+	atg7	nm_001136031	97	12	64	17
chr22_24666784_24666784	chr22	24666784	24666784	+	specc1l	nm_001145468	23	2	19	3
chr1_11918992_11918992	chr1	11918992	11918992	-	nppb	nm_002521	1411	79	1294	232
chr8_120428551_120428551	chr8	120428551	120428551	+	nov	nm_002514	183	9	136	33
chr14_24838287_24838287	chr14	24838287	24838287	+	nfatc4	nm_001198966	46	1	27	7
chr14_24837225_24837225	chr14	24837225	24837225	+	nfatc4	nm_001198965	46	1	25	6
chr9_108320410_108320410	chr9	108320410	108320410	+	fktn	nm_001198963	136	15	244	63
chr1_53387446_53387446	chr1	53387446	53387446	-	echdc2	nm_001198962	120	11	203	30
chr1_182642067_182642067	chr1	182642067	182642067	-	rgs8	nm_001102450	759	57	763	181
chr3_158288952_158288952	chr3	158288952	158288952	+	mlf1	nm_001130157	129	16	133	29
chr14_21572863_21572863	chr14	21572863	21572863	-	znf219	nm_001102454	74	5	57	8
chr9_130524697_130524697	chr9	130524697	130524697	-	sh2d3c	nm_001142532	811	41	668	142
chr17_45401326_45401326	chr17	45401326	45401326	+	efcab13	nm_152347	106	6	78	14
chr6_52710893_52710893	chr6	52710893	52710893	-	gsta5	nm_153699	328	27	340	51
chr3_186915273_186915273	chr3	186915273	186915273	+	rtp1	nm_153708	169	14	114	24
chr9_99417599_99417599	chr9	99417599	99417599	-	aaed1	nm_153698	67	6	61	12
chr12_52626953_52626953	chr12	52626953	52626953	+	krt7	nm_005556	88	1	45	5
chr12_52845910_52845910	chr12	52845910	52845910	-	krt6b	nm_005555	218	14	295	57
chr17_75137004_75137004	chr17	75137004	75137004	+	sec14l1	nm_003003	45	1	32	6
chr5_83680685_83680685	chr5	83680685	83680685	-	edil3	nm_005711	49	1	49	5
chr3_33840062_33840062	chr3	33840062	33840062	+	pdcd6ip	nm_013374	37	4	47	8
chr13_93879077_93879077	chr13	93879077	93879077	+	gpc6	nm_005708	74	6	73	19
chr8_7321192_7321192	chr8	7321192	7321192	-	spag11b	nm_016512	4	0	7	0
chr12_10251605_10251605	chr12	10251605	10251605	-	clec1a	nm_016511	271	21	347	78
chr16_58426297_58426297	chr16	58426297	58426297	+	gins3	nm_022770	271	27	354	74
chr2_238969564_238969564	chr2	238969564	238969564	+	scly	nm_016510	129	10	140	25
chr8_21946713_21946713	chr8	21946713	21946713	+	fam160b2	nm_022749	118	5	65	11
chr1_220960038_220960038	chr1	220960038	220960038	+	marc1	nm_022746	123	3	84	18
chr7_139477693_139477693	chr7	139477693	139477693	-	hipk2	nm_022740	106	9	58	11
chr12_49999433_49999433	chr12	49999433	49999433	-	fam186b	nm_032130	134	9	171	36
chr1_27648635_27648635	chr1	27648635	27648635	+	tmem222	nm_032125	63	5	83	15
chr17_48585744_48585744	chr17	48585744	48585744	+	mycbpap	nm_032133	185	7	127	22
chr1_150693364_150693364	chr1	150693364	150693364	-	hormad1	nm_032132	140	10	165	26
chr19_7953389_7953389	chr19	7953389	7953389	+	lrrc8e	nm_001268285	159	8	164	15
chr2_101869344_101869344	chr2	101869344	101869344	+	cnot11	nm_017546	48	3	43	8
chrX_118739846_118739846	chrX	118739846	118739846	-	nkrf	nm_017544	60	10	56	16
chr1_166808723_166808723	chr1	166808723	166808723	+	pogk	nm_017542	77	8	54	15
chr3_186262167_186262167	chr3	186262167	186262167	-	crygs	nm_017541	55	8	71	16
chr2_9346893_9346893	chr2	9346893	9346893	+	asap2	nm_001135191	57	2	42	7
chr7_51384515_51384515	chr7	51384515	51384515	-	cobl	nm_001287438	1216	55	996	169
chr19_7694670_7694670	chr19	7694670	7694670	+	pet100	nr_033242	72	0	41	6
chr9_126030843_126030843	chr9	126030843	126030843	-	strbp	nr_033234	822	46	561	141
chr19_70966_70966	chr19	70966	70966	-	wash5p	nr_033266	0	0	0	0
chr20_61148768_61148768	chr20	61148768	61148768	-	c20orf166-as1	nr_033263	1703	28	1085	116
chr5_142783254_142783254	chr5	142783254	142783254	-	nr3c1	nm_001024094	48	1	22	9
chr2_138721807_138721807	chr2	138721807	138721807	+	hnmt	nm_001024075	55	12	51	7
chr2_138721807_138721807	chr2	138721807	138721807	+	hnmt	nm_001024074	55	12	51	7
chr1_47779819_47779819	chr1	47779819	47779819	-	stil	nm_001048166	43	2	35	9
chr14_55369542_55369542	chr14	55369542	55369542	-	gch1	nm_001024024	184	14	241	50
chr19_39694906_39694906	chr19	39694906	39694906	-	sycn	nm_001080468	1340	46	857	146
chr6_152011630_152011630	chr6	152011630	152011630	+	esr1	nm_001122742	78	9	92	23
chr5_111093252_111093252	chr5	111093252	111093252	-	nrep	nm_001142480	54	5	60	12
chr5_111093793_111093793	chr5	111093793	111093793	-	nrep	nm_001142477	67	7	75	16
chr5_111312628_111312628	chr5	111312628	111312628	-	nrep	nm_001142475	64	5	70	17
chrX_120114778_120114778	chrX	120114778	120114778	-	ct47a1	nm_001080146	0	0	0	0
chrX_120119638_120119638	chrX	120119638	120119638	-	ct47a1	nm_001080146	37	4	65	12
chrX_120066151_120066151	chrX	120066151	120066151	-	ct47a2	nm_001080145	0	0	0	0
chrX_120071012_120071012	chrX	120071012	120071012	-	ct47a2	nm_001080145	0	0	0	0
chr2_162164785_162164785	chr2	162164785	162164785	+	psmd14	nm_005805	72	3	70	12
chr4_119273922_119273922	chr4	119273922	119273922	-	prss12	nm_003619	108	8	104	24
chr11_11862969_11862969	chr11	11862969	11862969	+	usp47	nm_017944	57	6	51	8
chr15_69591293_69591293	chr15	69591293	69591293	+	paqr5	nm_017705	1047	49	506	91
chr2_39664453_39664453	chr2	39664453	39664453	-	map4k3	nm_003618	48	7	44	9
chrX_151922408_151922408	chrX	151922408	151922408	-	magea2	nm_175743	0	0	0	0
chrX_151883074_151883074	chrX	151883074	151883074	+	magea2	nm_175742	0	0	0	0
chr1_200860626_200860626	chr1	200860626	200860626	+	c1orf106	nm_018265	1331	80	1027	191
chr7_66461791_66461791	chr7	66461791	66461791	+	tyw1	nm_018264	8	0	9	0
chr17_17584786_17584786	chr17	17584786	17584786	+	rai1	nm_030665	205	8	134	18
chr1_152850797_152850797	chr1	152850797	152850797	+	smcp	nm_030663	172	9	207	53
chr19_4124126_4124126	chr19	4124126	4124126	-	map2k2	nm_030662	54	2	23	3
chr11_124546199_124546199	chr11	124546199	124546199	-	siae	nm_001199922	73	4	66	11
chr2_74120092_74120092	chr2	74120092	74120092	+	actg2	nm_001199893	2021	145	997	182
chr19_42498428_42498428	chr19	42498428	42498428	-	atp1a3	nm_001256214	1492	53	736	127
chr4_1857974_1857974	chr4	1857974	1857974	-	letm1	nm_012318	67	3	45	5
chr9_104160919_104160919	chr9	104160919	104160919	-	mrpl50	nm_019051	69	2	31	5
chr17_80332200_80332200	chr17	80332200	80332200	+	uts2r	nm_018949	1960	34	1175	125
chr14_81687296_81687296	chr14	81687296	81687296	-	gtf2a1	nm_015859	56	7	43	18
chr17_39968961_39968961	chr17	39968961	39968961	+	fkbp10	nm_021939	48	1	17	3
chr2_70475779_70475779	chr2	70475779	70475779	-	tia1	nm_022037	40	3	68	8
chr11_62446589_62446589	chr11	62446589	62446589	-	ubxn1	nm_015853	67	1	33	7
chr7_64451414_64451414	chr7	64451414	64451414	-	znf117	nm_015852	64	4	66	11
chr1_15802595_15802595	chr1	15802595	15802595	+	cela2b	nm_015849	143	7	125	13
chr6_33172413_33172413	chr6	33172413	33172413	+	hsd17b8	nm_014234	94	6	43	7
chr1_38100595_38100595	chr1	38100595	38100595	-	rspo1	nm_001242910	1813	96	1109	226
chr18_44544607_44544607	chr18	44544607	44544607	-	tceb3cl2	nm_001242907	4	0	5	0
chr17_8869029_8869029	chr17	8869029	8869029	-	pik3r5	nm_001251851	964	49	642	104
chr20_17539605_17539605	chr20	17539605	17539605	-	bfsp1	nm_001278607	51	7	34	10
chr14_74353317_74353317	chr14	74353317	74353317	+	znf410	nm_001242927	47	5	42	7
chr14_74353317_74353317	chr14	74353317	74353317	+	znf410	nm_001242926	47	5	42	7
chr1_205198058_205198058	chr1	205198058	205198058	+	tmcc2	nm_001242925	279	16	285	60
chr14_74353317_74353317	chr14	74353317	74353317	+	znf410	nm_001242924	47	5	42	7
chr22_38245378_38245378	chr22	38245378	38245378	+	eif3l	nm_001242923	63	3	29	5
chr11_96123083_96123083	chr11	96123083	96123083	-	ccdc82	nm_024725	51	6	70	17
chr17_43213013_43213013	chr17	43213013	43213013	+	acbd4	nm_024722	81	4	38	11
chr6_30043626_30043626	chr6	30043626	30043626	-	rnf39	nm_170769	1601	92	1182	209
chr11_44117098_44117098	chr11	44117098	44117098	+	ext2	nm_207122	104	9	115	28
chr11_67222817_67222817	chr11	67222817	67222817	+	cabp4	nm_145200	563	14	281	37
chr16_48269088_48269088	chr16	48269088	48269088	-	abcc11	nm_145186	216	19	273	56
chr15_82824865_82824865	chr15	82824865	82824865	-	rps17l	nm_001199057	0	0	0	0
chr14_95078713_95078713	chr14	95078713	95078713	+	serpina3	nm_001085	178	5	91	21
chr2_111878490_111878490	chr2	111878490	111878490	+	bcl2l11	nm_001204111	302	7	142	19
chr2_111878490_111878490	chr2	111878490	111878490	+	bcl2l11	nm_001204110	302	7	142	19
chr2_111878490_111878490	chr2	111878490	111878490	+	bcl2l11	nm_001204109	302	7	142	19
chr8_145550582_145550582	chr8	145550582	145550582	-	dgat1	nm_012079	118	2	42	4
chr8_42128819_42128819	chr8	42128819	42128819	+	ikbkb	nm_001556	72	1	30	3
chrY_19882440_19882440	chrY	19882440	19882440	-	xkry	nm_004677	0	0	0	0
chr2_198381021_198381021	chr2	198381021	198381021	+	mob4	nm_001204094	54	4	46	5
chr8_11660119_11660119	chr8	11660119	11660119	+	fdft1	nm_004462	49	1	36	8
chr12_6898637_6898637	chr12	6898637	6898637	+	cd4	nm_001195016	274	10	233	41
chr12_6898637_6898637	chr12	6898637	6898637	+	cd4	nm_001195015	274	10	233	41
chr12_6898637_6898637	chr12	6898637	6898637	+	cd4	nm_001195014	274	10	233	41
chr16_58035276_58035276	chr16	58035276	58035276	+	usb1	nm_001204911	77	3	46	10
chr1_24646055_24646055	chr1	24646055	24646055	+	grhl3	nm_001195010	914	57	669	146
chr17_7905987_7905987	chr17	7905987	7905987	+	gucy2d	nm_000180	1433	77	1349	222
chr12_123921264_123921264	chr12	123921264	123921264	-	rilpl2	nm_145058	74	1	37	5
chr11_62623103_62623103	chr11	62623103	62623103	-	snord25	nr_002565	77	8	40	8
chr11_62622838_62622838	chr11	62622838	62622838	-	snord26	nr_002564	74	8	39	6
chr11_62622555_62622555	chr11	62622555	62622555	-	snord27	nr_002563	72	8	41	6
chr11_62622167_62622167	chr11	62622167	62622167	-	snord28	nr_002562	66	9	43	6
chr11_62621204_62621204	chr11	62621204	62621204	-	snord30	nr_002561	65	9	49	7
chr11_62620865_62620865	chr11	62620865	62620865	-	snord31	nr_002560	63	8	49	7
chr4_8594386_8594386	chr4	8594386	8594386	+	cpz	nm_001014448	1220	34	662	108
chr10_103578222_103578222	chr10	103578222	103578222	-	mgea5	nm_001142434	52	3	21	2
chr4_95373007_95373007	chr4	95373007	95373007	+	pdlim5	nm_001256426	57	5	36	11
chr4_95373007_95373007	chr4	95373007	95373007	+	pdlim5	nm_001256425	57	5	36	11
chr12_132628992_132628992	chr12	132628992	132628992	+	noc4l	nm_024078	63	2	38	5
chr1_161655042_161655042	chr1	161655042	161655042	-	rpl31p11	nr_002595	389	56	414	80
chr17_7480128_7480128	chr17	7480128	7480128	+	snord10	nr_002604	69	5	32	5
chr16_21531765_21531765	chr16	21531765	21531765	-	slc7a5p2	nr_002594	20	0	11	0
chr16_29625038_29625038	chr16	29625038	29625038	-	slc7a5p1	nr_002593	5	0	14	1
chr19_3982570_3982570	chr19	3982570	3982570	-	snord37	nr_002602	66	2	27	7
chr5_180668889_180668889	chr5	180668889	180668889	-	snord96a	nr_002592	66	3	22	7
chr6_29794755_29794755	chr6	29794755	29794755	+	hla-g	nm_002127	1077	46	851	110
chr2_211421322_211421322	chr2	211421322	211421322	+	cps1	nm_001875	74	10	131	32
chr6_49431041_49431041	chr6	49431041	49431041	-	mut	nm_000255	56	7	51	10
chr9_35406751_35406751	chr9	35406751	35406751	+	atp8b5p	nr_110320	150	13	154	31
chr17_66597095_66597095	chr17	66597095	66597095	-	fam20a	nm_017565	100	8	127	27
chr6_40555126_40555126	chr6	40555126	40555126	-	lrfn2	nm_020737	1555	82	1020	218
chr2_176867018_176867018	chr2	176867018	176867018	-	kiaa1715	nm_030650	76	6	84	16
chr1_153538306_153538306	chr1	153538306	153538306	-	s100a2	nm_005978	74	3	32	6
chr14_101335396_101335396	chr14	101335396	101335396	+	mir493	nr_030172	127	6	64	11
chr3_120114576_120114576	chr3	120114576	120114576	-	mir198	nr_029584	90	4	82	13
chrX_145078261_145078261	chrX	145078261	145078261	-	mir892a	nr_030584	46	0	36	13
chr2_220158922_220158922	chr2	220158922	220158922	-	mir153-1	nr_029688	268	9	208	38
chr2_136288300_136288300	chr2	136288300	136288300	-	zranb3	nm_001286569	50	1	35	5
chr8_70016425_70016425	chr8	70016425	70016425	-	rp11-600k15.1	nr_039986	53	2	58	13
chr1_161068150_161068150	chr1	161068150	161068150	+	klhdc9	nr_033386	92	5	66	9
chr1_161068150_161068150	chr1	161068150	161068150	+	klhdc9	nr_033385	92	5	66	9
chr19_19754476_19754476	chr19	19754476	19754476	-	gmip	nm_001288999	67	2	39	6
chr4_83931987_83931987	chr4	83931987	83931987	-	lin54	nm_001288997	58	4	40	9
chr19_19754476_19754476	chr19	19754476	19754476	-	gmip	nm_001288998	67	2	39	6
chr2_110962639_110962639	chr2	110962639	110962639	-	nphp1	nm_001128178	73	5	94	21
chr4_172734574_172734574	chr4	172734574	172734574	+	galntl6	nm_001034845	930	70	759	179
chr12_7013896_7013896	chr12	7013896	7013896	+	lrrc23	nm_201650	81	5	92	17
chr1_44483012_44483012	chr1	44483012	44483012	-	slc6a9	nm_201649	95	2	47	12
chr11_58499447_58499447	chr11	58499447	58499447	-	glyat	nm_201648	355	32	423	76
chr15_32828959_32828959	chr15	32828959	32828959	+	loc100996255	nr_102756	0	0	0	0
chr5_55290994_55290994	chr5	55290994	55290994	+	flj31104	nr_102755	47	1	32	7
chr15_97324884_97324884	chr15	97324884	97324884	-	spata8-as1	nr_102754	85	4	61	10
chr15_52472222_52472222	chr15	52472222	52472222	+	rp11-430b1.2	nr_102751	215	7	216	39
chr15_82944749_82944749	chr15	82944749	82944749	+	loc727751	nr_102748	1	0	0	0
chr15_83182973_83182973	chr15	83182973	83182973	-	loc727751	nr_102748	0	0	0	0
chr15_82944749_82944749	chr15	82944749	82944749	+	loc727751	nr_102747	1	0	0	0
chr15_83182973_83182973	chr15	83182973	83182973	-	loc727751	nr_102747	0	0	0	0
chr6_33168602_33168602	chr6	33168602	33168602	+	slc39a7	nm_001077516	57	5	41	6
chr7_120629444_120629444	chr7	120629444	120629444	+	cped1	nm_001105533	86	9	73	13
chr1_159825137_159825137	chr1	159825137	159825137	-	c1orf204	nm_001134233	67	5	42	8
chr6_71123106_71123106	chr6	71123106	71123106	+	fam135a	nm_001105531	92	3	122	17
chr9_117568408_117568408	chr9	117568408	117568408	-	tnfsf15	nm_005118	137	10	163	40
chr18_77623667_77623667	chr18	77623667	77623667	+	kcng2	nm_012283	762	40	486	89
chr1_161676761_161676761	chr1	161676761	161676761	+	fcrla	nm_032738	67	9	101	24
chr12_70093196_70093196	chr12	70093196	70093196	-	best3	nm_032735	104	6	155	24
chr6_24403135_24403135	chr6	24403135	24403135	+	mrs2	nm_020662	133	14	231	43
chr16_30968614_30968614	chr16	30968614	30968614	+	setd1a	nm_014712	46	2	37	3
chr21_45960078_45960078	chr21	45960078	45960078	-	krtap10-1	nm_198691	538	31	466	89
chr21_46047039_46047039	chr21	46047039	46047039	+	krtap10-9	nm_198690	449	11	294	35
chr21_46020496_46020496	chr21	46020496	46020496	+	krtap10-7	nm_198689	825	39	584	118
chr21_46012386_46012386	chr21	46012386	46012386	-	krtap10-6	nm_198688	831	22	576	88
chr21_45993605_45993605	chr21	45993605	45993605	+	krtap10-4	nm_198687	636	37	412	78
chr4_144826716_144826716	chr4	144826716	144826716	-	gype	nm_198682	36	1	65	5
chr10_70980058_70980058	chr10	70980058	70980058	+	hkdc1	nm_025130	165	9	240	49
chr19_50316567_50316567	chr19	50316567	50316567	-	fuz	nm_025129	43	1	40	6
chr20_68350_68350	chr20	68350	68350	+	defb125	nm_153325	198	15	346	68
chr1_226411318_226411318	chr1	226411318	226411318	+	mixl1	nm_031944	712	25	573	100
chr2_174219560_174219560	chr2	174219560	174219560	+	cdca7	nm_031942	953	62	950	171
chr2_101925178_101925178	chr2	101925178	101925178	-	rnf149	nm_173647	83	4	98	18
chr1_42846467_42846467	chr1	42846467	42846467	+	rimkla	nm_173642	950	93	927	208
chrX_17755568_17755568	chrX	17755568	17755568	+	scml1	nm_001037540	31	4	25	8
chr10_13341746_13341746	chr10	13341746	13341746	-	phyh	nm_001037537	34	2	23	2
chr1_146697230_146697230	chr1	146697230	146697230	-	fmo5	nm_001461	154	7	105	25
chr12_6875540_6875540	chr12	6875540	6875540	+	ptms	nm_002824	61	1	39	5
chr10_97321177_97321177	chr10	97321177	97321177	-	sorbs1	nm_024991	592	31	544	109
chr11_118215058_118215058	chr11	118215058	118215058	+	cd3g	nm_000073	674	48	670	130
chr11_44117746_44117746	chr11	44117746	44117746	+	ext2	nm_000401	83	6	93	26
chr16_330605_330605	chr16	330605	330605	+	arhgdig	nm_001176	1001	13	637	63
chrX_19140755_19140755	chrX	19140755	19140755	-	gpr64	nm_001184837	518	45	239	45
chr1_112162404_112162404	chr1	112162404	112162404	+	rap1a	nm_002884	80	4	86	26
chr12_123718027_123718027	chr12	123718027	123718027	+	c12orf65	nm_001194995	57	2	31	8
chr8_30585486_30585486	chr8	30585486	30585486	-	gsr	nm_001195104	65	10	52	7
chr11_65430443_65430443	chr11	65430443	65430443	-	rela	nm_001243984	46	1	18	4
chrX_129299861_129299861	chrX	129299861	129299861	-	aifm1	nm_001130847	28	0	17	7
chr6_154360545_154360545	chr6	154360545	154360545	+	oprm1	nm_001145284	203	18	230	44
chr15_75918446_75918446	chr15	75918446	75918446	-	snupn	nm_001042581	35	2	30	7
chr19_19314238_19314238	chr19	19314238	19314238	-	nr2c2ap	nm_176880	302	16	196	37
chr1_62208148_62208148	chr1	62208148	62208148	+	inadl	nm_176877	76	3	50	11
chr9_33511164_33511164	chr9	33511164	33511164	-	sugt1p1	nr_003667	19	0	37	6
chr11_119039421_119039421	chr11	119039421	119039421	+	nlrx1	nm_001282144	57	2	61	12
chrY_24587584_24587584	chrY	24587584	24587584	-	ttty6b	nr_002175	0	0	0	0
chr11_85522202_85522202	chr11	85522202	85522202	-	sytl2	nm_001289608	232	11	279	63
chrY_27601457_27601457	chrY	27601457	27601457	+	golga2p3y	nr_002195	0	0	0	0
chr1_155197325_155197325	chr1	155197325	155197325	-	gbap1	nr_002188	62	0	40	2
chr7_128695276_128695276	chr7	128695276	128695276	+	tpi1p2	nr_002187	101	9	133	34
chr22_42978017_42978017	chr22	42978017	42978017	-	rrp7b	nr_002184	38	3	15	3
chr11_17757494_17757494	chr11	17757494	17757494	+	kcnc1	nm_001112741	1821	65	1151	209
chrX_120105058_120105058	chrX	120105058	120105058	-	ct47a6	nm_001080141	0	0	0	0
chrX_120109918_120109918	chrX	120109918	120109918	-	ct47a6	nm_001080141	0	0	0	0
chrX_120114778_120114778	chrX	120114778	120114778	-	ct47a6	nm_001080141	0	0	0	0
chrX_120119638_120119638	chrX	120119638	120119638	-	ct47a6	nm_001080141	37	4	65	12
chrX_120090454_120090454	chrX	120090454	120090454	-	ct47a7	nm_001080140	0	0	0	0
chr19_7030593_7030593	chr19	7030593	7030593	+	mbd3l5	nm_001136507	4	3	8	1
chr12_51632507_51632507	chr12	51632507	51632507	+	dazap2	nm_001136268	62	5	43	15
chr14_21152371_21152371	chr14	21152371	21152371	+	rnase4	nm_001282193	60	4	47	14
chrX_47931025_47931025	chrX	47931025	47931025	-	znf630	nm_001282202	43	1	43	11
chr14_21152371_21152371	chr14	21152371	21152371	+	rnase4	nm_001282192	60	4	47	14
chrX_47931025_47931025	chrX	47931025	47931025	-	znf630	nm_001282201	43	1	43	11
chr7_129691291_129691291	chr7	129691291	129691291	-	zc3hc1	nm_001282191	38	2	87	17
chr15_91073117_91073117	chr15	91073117	91073117	+	crtc3	nm_001042574	57	5	32	6
chr1_21672034_21672034	chr1	21672034	21672034	-	ece1	nm_001113348	431	34	377	74
chr5_52856464_52856464	chr5	52856464	52856464	+	ndufs4	nm_002495	70	8	92	16
chr9_32573182_32573182	chr9	32573182	32573182	-	ndufb6	nm_002493	65	2	70	16
chr2_207024243_207024243	chr2	207024243	207024243	-	ndufs1	nm_001199983	54	3	34	6
chr2_207024243_207024243	chr2	207024243	207024243	-	ndufs1	nm_001199982	54	3	34	6
chr14_21029090_21029090	chr14	21029090	21029090	-	rnase9	nm_001110361	411	37	502	106
chr14_21029090_21029090	chr14	21029090	21029090	-	rnase9	nm_001110360	411	37	502	106
chr9_98270322_98270322	chr9	98270322	98270322	-	ptch1	nm_001083605	43	3	31	4
chr9_131038424_131038424	chr9	131038424	131038424	+	swi5	nm_001040011	53	2	28	4
chr14_21029090_21029090	chr14	21029090	21029090	-	rnase9	nm_001110358	411	37	502	106
chr11_67777774_67777774	chr11	67777774	67777774	+	aldh3b1	nm_001290058	66	6	31	8
chr11_67777774_67777774	chr11	67777774	67777774	+	aldh3b1	nm_001290059	66	6	31	8
chr13_78492966_78492966	chr13	78492966	78492966	-	ednrb	nm_003991	1018	57	907	207
chr6_3000049_3000049	chr6	3000049	3000049	+	nqo2	nm_001290221	45	2	34	10
chr2_56151298_56151298	chr2	56151298	56151298	-	efemp1	nm_001039349	184	15	230	44
chr7_6388590_6388590	chr7	6388590	6388590	-	fam220a	nm_001037163	84	3	116	20
chr6_106773695_106773695	chr6	106773695	106773695	-	atg5	nm_001286111	101	8	96	21
chr19_36705503_36705503	chr19	36705503	36705503	+	znf146	nm_001099638	51	4	28	5
chr1_26146396_26146396	chr1	26146396	26146396	+	mtfr1l	nm_001099627	55	3	30	7
chr10_52008370_52008370	chr10	52008370	52008370	-	asah2	nm_001143974	496	58	667	158
chr19_36249043_36249043	chr19	36249043	36249043	+	c19orf55	nm_001039887	59	1	29	2
chr9_27573864_27573864	chr9	27573864	27573864	-	c9orf72	nm_001256054	281	21	371	72
chr10_99496877_99496877	chr10	99496877	99496877	+	zfyve27	nm_001174120	84	2	60	10
chr12_133067156_133067156	chr12	133067156	133067156	+	fbrsl1	nm_001142641	177	2	120	16
chr22_19744225_19744225	chr22	19744225	19744225	+	tbx1	nm_005992	2135	39	1212	154
chr18_61034506_61034506	chr18	61034506	61034506	-	kdsr	nm_002035	72	9	53	10
chr1_85527980_85527980	chr1	85527980	85527980	+	wdr63	nm_001288563	70	9	99	23
chr10_123687578_123687578	chr10	123687578	123687578	-	ate1	nm_001288735	54	4	44	7
chr16_1877195_1877195	chr16	1877195	1877195	-	hagh	nm_005326	37	1	37	6
chr2_171673199_171673199	chr2	171673199	171673199	+	gad1	nm_013445	1802	65	1420	228
chr6_52668664_52668664	chr6	52668664	52668664	-	gsta1	nm_145740	121	6	168	10
chr13_111767623_111767623	chr13	111767623	111767623	+	arhgef7	nm_145735	1405	113	1140	206
chr15_78933587_78933587	chr15	78933587	78933587	-	chrnb4	nm_000750	601	27	570	89
chr1_9294862_9294862	chr1	9294862	9294862	+	h6pd	nm_004285	51	2	43	10
chr3_35680665_35680665	chr3	35680665	35680665	+	arpp21	nm_001267616	959	69	787	164
chr1_100315639_100315639	chr1	100315639	100315639	+	agl	nm_000642	66	1	89	20
chr8_26435339_26435339	chr8	26435339	26435339	+	dpysl2	nm_001386	56	3	35	6
chr8_133459509_133459509	chr8	133459509	133459509	-	kcnq3	nm_001204824	331	24	462	109
chr1_44435652_44435652	chr1	44435652	44435652	+	dph2	nm_001384	68	3	39	6
chr12_4758263_4758263	chr12	4758263	4758263	+	ndufa9	nm_005002	58	8	85	15
chr19_47291842_47291842	chr19	47291842	47291842	-	slc1a5	nm_005628	53	2	25	6
chr12_57505196_57505196	chr12	57505196	57505196	-	stat6	nm_003153	57	3	39	12
chr7_99756302_99756302	chr7	99756302	99756302	-	c7orf43	nm_018275	68	4	40	8
chr6_151186814_151186814	chr6	151186814	151186814	+	mthfd1l	nm_015440	62	3	51	11
chr3_149470286_149470286	chr3	149470286	149470286	-	commd2	nm_016094	78	13	109	23
chr18_33171700_33171700	chr18	33171700	33171700	+	mir3975	nr_039771	64	7	57	16
chr12_17826232_17826232	chr12	17826232	17826232	+	mir3974	nr_039770	108	14	131	32
chr11_36031647_36031647	chr11	36031647	36031647	+	mir3973	nr_039769	58	7	47	12
chr9_36864305_36864305	chr9	36864305	36864305	-	mir4540	nr_039766	966	41	676	105
chr13_100058554_100058554	chr13	100058554	100058554	-	mir548an	nr_039765	888	43	697	156
chr22_49176106_49176106	chr22	49176106	49176106	+	mir4535	nr_039761	121	6	106	17
chr22_38384800_38384800	chr22	38384800	38384800	+	mir4534	nr_039759	199	10	119	23
chr20_59053168_59053168	chr20	59053168	59053168	+	mir4533	nr_039758	478	35	347	67
chr1_31886659_31886659	chr1	31886659	31886659	+	serinc2	nm_018565	84	8	43	8
chr2_69001932_69001932	chr2	69001932	69001932	+	arhgap25	nm_014882	351	22	311	78
chrX_134975784_134975784	chrX	134975784	134975784	+	sage1	nm_018666	96	4	150	26
chr13_113863029_113863029	chr13	113863029	113863029	-	pcid2	nm_018386	58	5	46	7
chr17_42264353_42264353	chr17	42264353	42264353	+	tmub2	nm_024107	57	2	45	8
chr11_65627871_65627871	chr11	65627871	65627871	+	mus81	nm_025128	50	3	28	3
chr14_23479410_23479410	chr14	23479410	23479410	-	c14orf93	nm_021944	52	3	50	11
chr4_987228_987228	chr4	987228	987228	-	slc26a1	nm_022042	196	8	121	22
chr5_140201360_140201360	chr5	140201360	140201360	+	pcdha5	nm_018908	82	9	126	32
chr2_196933536_196933536	chr2	196933536	196933536	-	dnah7	nm_018897	79	3	122	26
chr5_122424840_122424840	chr5	122424840	122424840	+	prdm6	nm_001136239	695	41	618	101
chr1_204797781_204797781	chr1	204797781	204797781	+	nfasc	nm_001160333	254	18	235	62
chr8_74884522_74884522	chr8	74884522	74884522	-	tceb1	nm_001204863	44	4	24	5
chr16_75300707_75300707	chr16	75300707	75300707	-	bcar1	nm_001170716	70	0	33	9
chr17_3375067_3375067	chr17	3375067	3375067	-	spata22	nm_001170699	147	11	219	50
chr17_3375142_3375142	chr17	3375142	3375142	-	spata22	nm_001170696	150	10	220	50
chr5_132202576_132202576	chr5	132202576	132202576	-	gdf9	nm_001288824	87	5	73	18
chr5_132202576_132202576	chr5	132202576	132202576	-	gdf9	nm_001288825	87	5	73	18
chr4_16077741_16077741	chr4	16077741	16077741	-	prom1	nm_001145849	1090	99	1068	246
chr10_14614372_14614372	chr10	14614372	14614372	-	fam107b	nm_001282700	64	6	52	16
chr7_23145352_23145352	chr7	23145352	23145352	+	klhl7	nm_001172428	62	5	92	16
chr8_22019183_22019183	chr8	22019183	22019183	+	sftpc	nm_001172410	1906	103	1185	225
chrX_100641212_100641212	chrX	100641212	100641212	-	btk	nm_000061	206	20	229	59
chr1_19970207_19970207	chr1	19970207	19970207	+	nbl1	nm_001204084	80	2	42	10
chr4_69536494_69536494	chr4	69536494	69536494	-	ugt2b15	nm_001076	51	7	57	9
chr1_19923470_19923470	chr1	19923470	19923470	+	minos1	nm_001204082	57	3	36	8
chr12_99288674_99288674	chr12	99288674	99288674	-	anks1b	nm_001204081	1458	108	1449	302
chrX_24167853_24167853	chrX	24167853	24167853	+	zfx	nm_003410	29	1	11	3
chr16_2390747_2390747	chr16	2390747	2390747	-	abca3	nm_001089	518	26	403	76
chr12_25205180_25205180	chr12	25205180	25205180	+	lrmp	nm_001204126	156	25	215	44
chr7_94285636_94285636	chr7	94285636	94285636	+	peg10	nm_001184962	378	29	237	38
chr16_67207755_67207755	chr16	67207755	67207755	+	nol3	nm_001185057	72	5	51	8
chr14_33408458_33408458	chr14	33408458	33408458	+	npas3	nm_001164749	596	45	771	163
chr12_26111963_26111963	chr12	26111963	26111963	+	rassf8	nm_001164748	46	3	35	2
chr12_26126687_26126687	chr12	26126687	26126687	+	rassf8	nm_001164747	86	8	55	14
chr8_104831415_104831415	chr8	104831415	104831415	+	rims2	nm_014677	283	29	610	116
chr1_31538564_31538564	chr1	31538564	31538564	-	pum1	nm_014676	38	4	32	9
chr20_44462469_44462469	chr20	44462469	44462469	+	snx21	nm_152897	81	4	31	3
chr9_6413150_6413150	chr9	6413150	6413150	+	uhrf2	nm_152896	65	4	66	13
chr17_42082031_42082031	chr17	42082031	42082031	+	nags	nm_153006	489	5	312	34
chr1_228291022_228291022	chr1	228291022	228291022	-	c1orf35	nm_024319	78	4	45	7
chr3_148583042_148583042	chr3	148583042	148583042	+	cpa3	nm_001870	124	9	240	44
chr17_36584719_36584719	chr17	36584719	36584719	+	arhgap23	nm_001199417	57	5	37	7
chr12_60083117_60083117	chr12	60083117	60083117	+	slc16a7	nr_073056	64	4	108	21
chr18_71959251_71959251	chr18	71959251	71959251	-	cyb5a	nm_001914	83	3	44	6
chr1_45988562_45988562	chr1	45988562	45988562	-	prdx1	nm_001202431	51	3	47	6
chr15_49170289_49170289	chr15	49170289	49170289	+	eid1	nm_014335	63	3	90	5
chr11_115375241_115375241	chr11	115375241	115375241	-	cadm1	nm_014333	947	43	762	138
chr11_134123433_134123433	chr11	134123433	134123433	+	acad8	nm_014384	59	5	49	11
chr19_38270230_38270230	chr19	38270230	38270230	-	znf573	nm_001172689	46	4	32	7
chr22_38004480_38004480	chr22	38004480	38004480	+	gga1	nm_001172687	109	7	135	40
chr15_72598656_72598656	chr15	72598656	72598656	-	celf6	nm_001172685	214	16	204	43
chr17_73521782_73521782	chr17	73521782	73521782	+	llgl2	nm_004524	707	24	421	48
chr19_32836513_32836513	chr19	32836513	32836513	+	znf507	nm_001136156	150	9	126	25
chr4_169753155_169753155	chr4	169753155	169753155	+	palld	nm_001166110	47	2	42	4
chr1_155658819_155658819	chr1	155658819	155658819	-	yy1ap1	nm_001198901	28	2	23	8
chr3_71778269_71778269	chr3	71778269	71778269	-	eif4e3	nm_001134650	457	43	561	133
chr6_37225931_37225931	chr6	37225931	37225931	-	tmem217	nm_001162900	73	5	111	28
chr1_36771993_36771993	chr1	36771993	36771993	+	sh3d21	nm_001162530	56	2	31	5
chr1_161551128_161551128	chr1	161551128	161551128	+	fcgr2c	nm_201563	13	0	15	3
chr1_76190031_76190031	chr1	76190031	76190031	+	acadm	nm_001127328	84	6	79	10
chr12_121570630_121570630	chr12	121570630	121570630	+	p2rx7	nr_033950	246	24	234	41
chr12_121570630_121570630	chr12	121570630	121570630	+	p2rx7	nr_033949	246	24	234	41
chr12_121570630_121570630	chr12	121570630	121570630	+	p2rx7	nr_033948	246	24	234	41
chr7_100472700_100472700	chr7	100472700	100472700	+	srrt	nm_001128853	62	4	29	5
chr19_12941230_12941230	chr19	12941230	12941230	-	rtbdn	nm_001080997	902	53	652	114
chr3_49170599_49170599	chr3	49170599	49170599	-	lamb2	nm_002292	88	4	43	12
chr14_70714518_70714518	chr14	70714518	70714518	-	adam21p1	nr_003951	204	14	316	64
chr13_25875665_25875665	chr13	25875665	25875665	+	nupl1	nm_014089	124	14	114	25
chr2_86422893_86422893	chr2	86422893	86422893	-	immt	nm_006839	45	5	34	4
chr12_95867821_95867821	chr12	95867821	95867821	+	metap2	nm_006838	74	8	63	5
chr6_146864827_146864827	chr6	146864827	146864827	+	rab32	nm_006834	92	10	102	14
chr15_45406359_45406359	chr15	45406359	45406359	-	duox2	nm_014080	2481	126	1692	300
chr17_31254927_31254927	chr17	31254927	31254927	+	tmem98	nm_015544	115	11	105	22
chr3_158519714_158519714	chr3	158519714	158519714	+	mfsd1	nm_022736	55	1	65	6
chr6_119215240_119215240	chr6	119215240	119215240	+	asf1a	nm_014034	50	1	45	10
chr2_167744996_167744996	chr2	167744996	167744996	+	xirp2	nm_001199143	129	12	171	32
chr6_27777841_27777841	chr6	27777841	27777841	+	hist1h3h	nm_003536	40	7	28	10
chr6_27858570_27858570	chr6	27858570	27858570	-	hist1h3j	nm_003535	73	8	82	16
chr6_26271612_26271612	chr6	26271612	26271612	-	hist1h3g	nm_003534	843	66	959	198
chr6_27840099_27840099	chr6	27840099	27840099	-	hist1h3i	nm_003533	74	7	56	12
chr6_26225382_26225382	chr6	26225382	26225382	+	hist1h3e	nm_003532	1456	135	1547	353
chr6_26045638_26045638	chr6	26045638	26045638	+	hist1h3c	nm_003531	35	0	49	9
chr6_26020717_26020717	chr6	26020717	26020717	+	hist1h3a	nm_003529	89	6	60	12
chr1_149858232_149858232	chr1	149858232	149858232	-	hist2h2be	nm_003528	51	5	26	4
chr1_87380107_87380107	chr1	87380107	87380107	-	2015-09-01	nm_004261	47	4	38	6
chr16_16043433_16043433	chr16	16043433	16043433	+	abcc1	nm_004996	67	1	36	7
chrX_70474499_70474499	chrX	70474499	70474499	-	zmym3	nm_005096	27	1	17	5
chr10_102732285_102732285	chr10	102732285	102732285	+	sema4g	nm_001203244	222	14	124	27
chr19_36399211_36399211	chr19	36399211	36399211	-	tyrobp	nm_001173515	149	5	115	22
chr10_96698414_96698414	chr10	96698414	96698414	+	cyp2c9	nm_000771	71	5	72	8
chr11_34654010_34654010	chr11	34654010	34654010	+	ehf	nm_001206616	139	13	83	18
chr13_100258917_100258917	chr13	100258917	100258917	+	clybl	nm_206808	213	11	216	30
chr3_194090472_194090472	chr3	194090472	194090472	-	lrrc15	nm_130830	181	8	179	35
chr5_126853300_126853300	chr5	126853300	126853300	+	prrc1	nm_130809	114	9	132	30
chrX_52896332_52896332	chrX	52896332	52896332	-	xage3	nm_130776	58	7	64	11
chr21_32119520_32119520	chr21	32119520	32119520	-	krtap21-2	nm_181617	142	20	145	30
chr21_32007582_32007582	chr21	32007582	32007582	+	krtap20-2	nm_181616	94	4	99	22
chr21_31988773_31988773	chr21	31988773	31988773	+	krtap20-1	nm_181615	118	8	119	26
chr20_388708_388708	chr20	388708	388708	+	rbck1	nm_006462	56	6	51	8
chr1_63063157_63063157	chr1	63063157	63063157	+	angptl3	nm_014495	69	8	56	16
chr12_70760061_70760061	chr12	70760061	70760061	+	kcnmb4	nm_014505	783	62	815	141
chr16_24741048_24741048	chr16	24741048	24741048	+	tnrc6a	nm_014494	35	0	48	11
chr6_24358280_24358280	chr6	24358280	24358280	-	dcdc2	nm_016356	644	45	763	136
chr11_20620945_20620945	chr11	20620945	20620945	+	slc6a5	nm_004211	2082	97	1551	238
chr5_131562935_131562935	chr5	131562935	131562935	-	p4ha2	nm_004199	109	7	91	12
chr11_57148623_57148623	chr11	57148623	57148623	-	prg3	nm_006093	757	54	667	168
chr7_30518393_30518393	chr7	30518393	30518393	-	nod1	nm_006092	83	3	66	10
chr2_45236542_45236542	chr2	45236542	45236542	-	six2	nm_016932	70	2	30	6
chr9_130478357_130478357	chr9	130478357	130478357	+	ttc16	nm_144965	62	2	33	2
chr2_209119182_209119182	chr2	209119182	209119182	-	idh1	nm_001282386	62	1	55	11
chr6_76782395_76782395	chr6	76782395	76782395	-	impg1	nm_001282368	67	9	106	25
chr2_161056824_161056824	chr2	161056824	161056824	-	itgb6	nm_001282355	84	9	140	40
chr6_31633656_31633656	chr6	31633656	31633656	+	csnk2b	nm_001282385	50	2	36	7
chr3_40547529_40547529	chr3	40547529	40547529	+	znf620	nm_001256167	88	5	84	17
chr1_165738159_165738159	chr1	165738159	165738159	-	tmco1	nm_001256165	63	4	30	7
chr16_10479911_10479911	chr16	10479911	10479911	+	atf7ip2	nm_001256160	103	6	78	12
chr1_35225341_35225341	chr1	35225341	35225341	+	gjb4	nm_153212	614	24	345	64
chr18_21572736_21572736	chr18	21572736	21572736	+	ttc39c	nm_153211	83	8	118	27
chr4_123653856_123653856	chr4	123653856	123653856	+	bbs12	nm_152618	52	6	61	15
chr16_90015138_90015138	chr16	90015138	90015138	+	def8	nm_001242817	158	6	83	9
chrX_52546044_52546044	chrX	52546044	52546044	-	xage1d	nm_133430	0	0	0	0
chr4_170533778_170533778	chr4	170533778	170533778	-	nek1	nm_012224	56	1	54	9
chr12_53440809_53440809	chr12	53440809	53440809	+	tenc1	nm_198316	49	0	26	6
chr19_12946242_12946242	chr19	12946242	12946242	-	rtbdn	nm_001270440	1838	82	1385	244
chr11_58170882_58170882	chr11	58170882	58170882	-	or5b3	nm_001005469	168	19	191	48
chr10_131762091_131762091	chr10	131762091	131762091	-	ebf3	nm_001005463	80	6	79	12
chr10_48806985_48806985	chr10	48806985	48806985	-	ptpn20a	nm_001042389	1	0	4	0
chr19_41883168_41883168	chr19	41883168	41883168	+	tmem91	nm_001042595	54	4	37	7
chr20_17662928_17662928	chr20	17662928	17662928	-	rrbp1	nm_001042576	343	20	308	55
chr19_10420233_10420233	chr19	10420233	10420233	-	zglp1	nm_001103167	47	3	27	5
chr10_43892794_43892794	chr10	43892794	43892794	-	hnrnpf	nm_001098207	54	2	36	3
chr10_43903299_43903299	chr10	43903299	43903299	-	hnrnpf	nm_001098206	52	3	23	4
chr10_43904332_43904332	chr10	43904332	43904332	-	hnrnpf	nm_001098205	54	2	20	2
chr10_46222647_46222647	chr10	46222647	46222647	+	fam21c	nm_001169106	15	0	16	0
chr7_103629963_103629963	chr7	103629963	103629963	-	reln	nm_173054	1239	71	1178	232
chr20_30946146_30946146	chr20	30946146	30946146	+	asxl1	nm_015338	44	3	31	5
chr22_18958010_18958010	chr22	18958010	18958010	+	dgcr5	nr_002733	638	10	396	36
chr10_81679933_81679933	chr10	81679933	81679933	+	mbl1p	nr_002724	53	3	61	9
chr22_22337240_22337240	chr22	22337240	22337240	-	top3b	nm_001282113	111	4	94	14
chr22_22337240_22337240	chr22	22337240	22337240	-	top3b	nm_001282112	111	4	94	14
chr4_6641817_6641817	chr4	6641817	6641817	+	mrfap1	nm_033296	48	0	27	3
chr6_137366317_137366317	chr6	137366317	137366317	-	il20ra	nm_014432	529	31	493	88
chr6_150390202_150390202	chr6	150390202	150390202	-	ulbp3	nm_024518	83	3	61	14
chr14_100842832_100842832	chr14	100842832	100842832	+	wdr25	nm_024515	53	2	43	9
chr10_35416384_35416384	chr10	35416384	35416384	+	crem	nm_183060	75	8	53	11
chr17_39093895_39093895	chr17	39093895	39093895	-	krt23	nm_001282433	64	6	98	20
chrX_123095161_123095161	chrX	123095161	123095161	+	stag2	nm_001282418	20	0	18	2
chr11_3078681_3078681	chr11	3078681	3078681	-	cars	nm_001014437	66	9	35	5
chr18_812327_812327	chr18	812327	812327	-	yes1	nm_005433	88	5	117	28
chr20_52199636_52199636	chr20	52199636	52199636	-	znf217	nm_006526	40	1	22	2
chr7_64254765_64254765	chr7	64254765	64254765	+	znf138	nm_006524	76	6	79	12
chr2_219724545_219724545	chr2	219724545	219724545	+	wnt6	nm_006522	2051	63	1388	257
chrX_48901043_48901043	chrX	48901043	48901043	-	tfe3	nm_006521	25	1	14	6
chr12_87232681_87232681	chr12	87232681	87232681	-	mgat4c	nm_013244	141	12	147	42
chr22_22020272_22020272	chr22	22020272	22020272	+	ppil2	nm_148175	75	1	48	7
chr12_14927269_14927269	chr12	14927269	14927269	+	h2afj	nm_177925	61	2	36	9
chr16_29471206_29471206	chr16	29471206	29471206	+	sult1a4	nm_001017390	1	0	2	0
chr6_36410543_36410543	chr6	36410543	36410543	+	kctd20	nm_001286579	35	2	34	7
chr15_88120159_88120159	chr15	88120159	88120159	+	linc00052	nr_026869	192	18	229	48
chr4_158493641_158493641	chr4	158493641	158493641	+	rp11-364p22.1	nr_026992	238	31	404	84
chr7_56563915_56563915	chr7	56563915	56563915	+	dkfzp434l192	nr_026929	77	4	48	15
chr6_33359312_33359312	chr6	33359312	33359312	+	kifc1	nm_002263	52	2	27	4
chr16_31494438_31494438	chr16	31494438	31494438	+	slc5a2	nm_003041	392	15	270	39
chr19_56165415_56165415	chr19	56165415	56165415	+	u2af2	nm_007279	38	2	27	2
chr20_34330258_34330258	chr20	34330258	34330258	-	rbm39	nr_040723	56	4	37	12
chr16_67184902_67184902	chr16	67184902	67184902	-	b3gnt9	nm_033309	69	0	34	2
chr11_104905884_104905884	chr11	104905884	104905884	-	casp1	nm_033295	81	5	98	19
chr5_141704620_141704620	chr5	141704620	141704620	-	spry4	nm_030964	69	7	34	9
chr1_935552_935552	chr1	935552	935552	-	hes4	nm_021170	1115	7	479	36
chr9_131217433_131217433	chr9	131217433	131217433	+	odf2	nm_153436	101	3	81	8
chr8_142431487_142431487	chr8	142431487	142431487	+	ptp4a3	nm_032611	549	12	309	51
chr20_30225690_30225690	chr20	30225690	30225690	+	cox4i2	nm_032609	557	20	308	41
chr17_3375041_3375041	chr17	3375041	3375041	-	spata22	nm_032598	146	10	221	50
chr14_102829253_102829253	chr14	102829253	102829253	-	cinp	nm_032630	81	4	44	13
chr19_18530145_18530145	chr19	18530145	18530145	+	ssbp4	nm_032627	48	0	28	1
chr4_140201492_140201492	chr4	140201492	140201492	-	mgarp	nm_032623	153	9	206	27
chr4_54424436_54424436	chr4	54424436	54424436	-	lnx1	nm_032622	126	14	126	31
chr6_32811862_32811862	chr6	32811862	32811862	+	tapsar1	nr_037174	72	4	36	8
chr6_35992305_35992305	chr6	35992305	35992305	-	slc26a8	nm_001193476	292	15	251	45
chr3_122283194_122283194	chr3	122283194	122283194	-	parp9	nm_001146106	60	2	52	13
chr12_68553521_68553521	chr12	68553521	68553521	-	ifng	nm_000619	473	58	713	169
chr12_102874378_102874378	chr12	102874378	102874378	-	igf1	nm_000618	94	10	292	84
chr11_58390145_58390145	chr11	58390145	58390145	+	cntf	nm_000614	57	1	62	14
chr17_42385926_42385926	chr17	42385926	42385926	+	rundc3a	nm_001144826	1026	34	711	137
chr2_233320832_233320832	chr2	233320832	233320832	+	alpi	nm_001631	1285	55	694	104
chr17_43971747_43971747	chr17	43971747	43971747	+	mapt	nm_001123066	1203	28	848	112
chr12_2904107_2904107	chr12	2904107	2904107	+	fkbp4	nm_002014	229	7	198	29
chr10_14920864_14920864	chr10	14920864	14920864	+	suv39h2	nm_001193425	65	8	51	7
chr20_51801821_51801821	chr20	51801821	51801821	+	tshz2	nm_001193421	835	86	661	149
chr22_18593452_18593452	chr22	18593452	18593452	+	tuba8	nm_001193414	764	42	805	148
chr6_133135707_133135707	chr6	133135707	133135707	+	rps12	nm_001016	62	1	65	12
chr19_1438362_1438362	chr19	1438362	1438362	+	rps15	nm_001018	60	0	36	3
chr16_1429684_1429684	chr16	1429684	1429684	-	unkl	nm_001193389	61	6	33	8
chr16_1464721_1464721	chr16	1464721	1464721	-	unkl	nm_001193388	62	2	38	7
chr17_73401789_73401789	chr17	73401789	73401789	-	grb2	nm_002086	101	4	89	13
chr1_33231234_33231234	chr1	33231234	33231234	+	kiaa1522	nm_001198973	75	7	49	9
chr14_24836116_24836116	chr14	24836116	24836116	+	nfatc4	nm_001198967	46	1	29	6
chr17_7476023_7476023	chr17	7476023	7476023	+	eif4a1	nm_001204510	63	6	42	13
chr7_5085451_5085451	chr7	5085451	5085451	+	rbak	nm_001204456	18	0	12	4
chr15_55700708_55700708	chr15	55700708	55700708	-	ccpg1	nm_001204451	31	0	34	5
chr3_45927995_45927995	chr3	45927995	45927995	+	ccr9	nm_001256369	714	59	551	130
chr2_155313950_155313950	chr2	155313950	155313950	-	ac009227.2	nm_001256368	100	9	132	33
chr17_48638428_48638428	chr17	48638428	48638428	+	cacna1g	nm_001256361	1252	26	673	84
chr17_9548853_9548853	chr17	9548853	9548853	+	usp43	nm_153210	989	46	720	146
chrX_11311532_11311532	chrX	11311532	11311532	+	amelx	nm_182681	90	11	108	16
chr7_44614137_44614137	chr7	44614137	44614137	-	ddx56	nm_019082	60	3	42	7
chr10_95653729_95653729	chr10	95653729	95653729	+	slc35g1	nm_153226	188	16	151	30
chr9_4741309_4741309	chr9	4741309	4741309	-	ak3	nm_016282	52	3	36	3
chr13_50159719_50159719	chr13	50159719	50159719	-	rcbtb1	nm_018191	82	4	81	13
chr11_124670299_124670299	chr11	124670299	124670299	-	msantd2	nm_024631	50	3	54	11
chr6_157802556_157802556	chr6	157802556	157802556	+	zdhhc14	nm_024630	399	32	292	53
chr4_185655286_185655286	chr4	185655286	185655286	-	cenpu	nm_024629	52	1	59	7
chr1_117753582_117753582	chr1	117753582	117753582	-	vtcn1	nm_024626	739	41	573	117
chr1_165325478_165325478	chr1	165325478	165325478	-	lmx1a	nm_001174069	1480	63	985	165
chr9_14779531_14779531	chr9	14779531	14779531	-	frem1	nm_001177704	254	24	351	76
chr22_37172177_37172177	chr22	37172177	37172177	-	ift27	nm_001177701	106	5	103	30
chr22_44287893_44287893	chr22	44287893	44287893	-	pnpla5	nm_001177675	1567	53	1131	194
chr12_45609769_45609769	chr12	45609769	45609769	+	ano6	nm_001204803	39	4	35	10
chr16_30064410_30064410	chr16	30064410	30064410	+	aldoa	nm_000034	79	3	37	9
chr1_170038056_170038056	chr1	170038056	170038056	-	kifap3	nm_001204517	51	8	81	10
chr4_178363657_178363657	chr4	178363657	178363657	-	aga	nm_000027	58	6	64	19
chr8_37824184_37824184	chr8	37824184	37824184	-	adrb3	nm_000025	1447	29	1016	124
chr5_148206155_148206155	chr5	148206155	148206155	+	adrb2	nm_000024	280	18	140	41
chr7_102389398_102389398	chr7	102389398	102389398	+	fam185a	nm_001145268	20	1	25	4
chr6_46620651_46620651	chr6	46620651	46620651	+	slc25a27	nm_001204051	185	24	222	43
chr17_80407602_80407602	chr17	80407602	80407602	-	c17orf62	nm_001193655	60	2	35	6
chr4_109087953_109087953	chr4	109087953	109087953	-	lef1	nm_001166119	1498	101	1395	255
chr7_33080777_33080777	chr7	33080777	33080777	-	nt5c3a	nm_001166118	61	6	88	22
chr5_58652727_58652727	chr5	58652727	58652727	-	pde4d	nm_001197219	517	50	793	179
chr12_52995322_52995322	chr12	52995322	52995322	-	krt72	nm_001146225	1573	106	1350	278
chr4_165304407_165304407	chr4	165304407	165304407	-	march1	nm_001166373	738	64	779	153
chr9_32384600_32384600	chr9	32384600	32384600	+	aco1	nm_001278352	200	15	188	48
chr8_42911441_42911441	chr8	42911441	42911441	+	fnta	nr_033698	54	6	35	12
chr5_140027370_140027370	chr5	140027370	140027370	-	ndufa2	nr_033697	50	1	36	5
chr1_171711379_171711379	chr1	171711379	171711379	-	vamp4	nr_033704	64	13	46	19
chr12_69864128_69864128	chr12	69864128	69864128	+	frs2	nm_001278353	40	3	64	16
chr6_53976215_53976215	chr6	53976215	53976215	+	mlip	nm_001281747	84	13	108	23
chr1_153936117_153936117	chr1	153936117	153936117	-	slc39a1	nm_001271958	42	1	29	6
chr12_53715412_53715412	chr12	53715412	53715412	-	aaas	nm_015665	52	2	40	8
chr7_143059840_143059840	chr7	143059840	143059840	-	fam131b	nm_001278297	1161	68	1023	197
chr17_7531286_7531286	chr17	7531286	7531286	+	shbg	nm_001289113	81	3	51	13
chr3_131756648_131756648	chr3	131756648	131756648	-	cpne4	nm_001289112	640	64	794	174
chr18_61816260_61816260	chr18	61816260	61816260	-	linc00305	nr_027245	140	15	139	32
chr15_40857256_40857256	chr15	40857256	40857256	-	c15orf57	nm_001080791	146	9	155	28
chr9_123342448_123342448	chr9	123342448	123342448	-	cdk5rap2	nm_001011649	70	5	28	4
chr1_45272957_45272957	chr1	45272957	45272957	-	tctex1d4	nm_001013632	60	2	22	4
chr1_12704565_12704565	chr1	12704565	12704565	+	aadacl4	nm_001013630	494	40	315	60
chr12_45686465_45686465	chr12	45686465	45686465	+	ano6	nm_001142678	61	3	65	9
chrX_92929011_92929011	chrX	92929011	92929011	+	fam133a	nm_001171110	50	6	63	15
chrX_20135114_20135114	chrX	20135114	20135114	-	map7d2	nm_152780	467	28	423	73
chr17_80408707_80408707	chr17	80408707	80408707	-	c17orf62	nr_036514	55	4	45	7
chr1_45477804_45477804	chr1	45477804	45477804	+	urod	nr_036510	84	3	36	11
chr12_13529679_13529679	chr12	13529679	13529679	-	c12orf36	nr_036555	268	25	239	57
chr17_37213271_37213271	chr17	37213271	37213271	+	loc100131347	nr_036551	165	10	197	31
chr2_135676176_135676176	chr2	135676176	135676176	-	ccnt2-as1	nr_036549	43	1	41	8
chr12_2045742_2045742	chr12	2045742	2045742	-	linc00940	nr_036546	189	12	180	31
chr11_3877291_3877291	chr11	3877291	3877291	+	mir4687	nr_039835	70	3	54	10
chr11_2194292_2194292	chr11	2194292	2194292	+	mir4686	nr_039834	339	6	204	28
chr10_100191117_100191117	chr10	100191117	100191117	-	mir4685	nr_039833	49	2	35	5
chr1_23046009_23046009	chr1	23046009	23046009	+	mir4684	nr_039832	179	6	152	33
chr10_121718024_121718024	chr10	121718024	121718024	+	mir4682	nr_039830	110	7	117	28
chr10_121137483_121137483	chr10	121137483	121137483	+	mir4681	nr_039829	186	16	154	40
chr10_112657847_112657847	chr10	112657847	112657847	+	mir4680	nr_039828	43	3	61	14
chr16_15704952_15704952	chr16	15704952	15704952	-	mir6506	nr_106761	61	5	72	20
chr12_48526579_48526579	chr12	48526579	48526579	+	mir6505	nr_106760	77	5	58	13
chr5_89854616_89854616	chr5	89854616	89854616	+	gpr98	nm_032119	1314	132	1543	322
chr13_103451398_103451398	chr13	103451398	103451398	+	bivm	nm_017693	55	2	37	4
chr6_43149921_43149921	chr6	43149921	43149921	+	cul9	nm_015089	53	2	61	13
chr5_140571951_140571951	chr5	140571951	140571951	+	pcdhb10	nm_018930	112	11	168	34
chr5_140868807_140868807	chr5	140868807	140868807	+	pcdhgc5	nm_018929	57	4	62	17
chr1_151431941_151431941	chr1	151431941	151431941	-	pogz	nm_015100	148	18	165	46
chr1_148930404_148930404	chr1	148930404	148930404	+	rp11-14n7.2	nr_027354	38	3	45	3
chr14_23470246_23470246	chr14	23470246	23470246	-	c14orf93	nm_001282969	128	6	104	32
chr2_234763212_234763212	chr2	234763212	234763212	-	hjurp	nm_001282963	74	6	64	18
chr2_233415296_233415296	chr2	233415296	233415296	+	eif4e2	nm_001282958	35	4	32	6
chr1_210502639_210502639	chr1	210502639	210502639	+	hhat	nm_001170580	102	9	91	14
chrX_118699372_118699372	chrX	118699372	118699372	-	cxorf56	nm_001170569	43	2	53	9
chr1_210501595_210501595	chr1	210501595	210501595	+	hhat	nm_001170564	106	5	87	17
chr2_220034817_220034817	chr2	220034817	220034817	-	slc23a3	nm_001144890	97	5	67	11
chr2_27593324_27593324	chr2	27593324	27593324	-	eif2b4	nm_015636	51	2	58	10
chr19_17571725_17571725	chr19	17571725	17571725	-	nxnl1	nm_138454	498	18	396	70
chr14_24768666_24768666	chr14	24768666	24768666	-	dhrs1	nm_138452	67	2	40	12
chr19_18632937_18632937	chr19	18632937	18632937	-	ell	nm_006532	43	0	30	4
chr10_32217804_32217804	chr10	32217804	32217804	-	arhgap12	nm_001270696	66	4	57	18
chr15_25446469_25446469	chr15	25446469	25446469	+	snord115-19	nr_003311	93	2	34	5
chr3_38388250_38388250	chr3	38388250	38388250	+	xylb	nm_005108	74	4	54	11
chr16_75285526_75285526	chr16	75285526	75285526	-	bcar1	nm_014567	60	3	19	3
chr17_2966901_2966901	chr17	2966901	2966901	-	or1d5	nm_014566	1	1	2	0
chr17_3118914_3118914	chr17	3118914	3118914	+	or1a1	nm_014565	81	2	95	21
chr9_139095004_139095004	chr9	139095004	139095004	-	lhx3	nm_014564	2201	43	1381	160
chrX_13752754_13752754	chrX	13752754	13752754	-	trappc2	nm_014563	40	1	27	3
chr5_177027118_177027118	chr5	177027118	177027118	+	b4galt7	nm_007255	65	1	44	8
chr19_15726028_15726028	chr19	15726028	15726028	+	cyp4f8	nm_007253	271	19	209	43
chr2_122042778_122042778	chr2	122042778	122042778	-	tfcp2l1	nm_014553	1420	71	1115	202
chr22_37915210_37915210	chr22	37915210	37915210	-	card10	nm_014550	215	9	175	23
chr15_52121824_52121824	chr15	52121824	52121824	+	tmod3	nm_014547	61	2	45	14
chr1_109234931_109234931	chr1	109234931	109234931	+	prpf38b	nm_018061	61	5	78	16
chr1_220267454_220267454	chr1	220267454	220267454	+	iars2	nm_018060	80	4	103	14
chr22_42949867_42949867	chr22	42949867	42949867	+	serhl2	nm_014509	79	2	66	7
chr2_58468515_58468515	chr2	58468515	58468515	-	fancl	nm_018062	134	24	183	51
chr9_106856540_106856540	chr9	106856540	106856540	+	smc2	nm_006444	61	5	60	19
chr19_5791249_5791249	chr19	5791249	5791249	-	dus3l	nm_001161619	79	0	36	7
chr13_78315294_78315294	chr13	78315294	78315294	+	slain1	nm_001242871	348	29	549	138
chr13_78315294_78315294	chr13	78315294	78315294	+	slain1	nm_001242870	348	29	549	138
chr13_78315294_78315294	chr13	78315294	78315294	+	slain1	nm_001242869	348	29	549	138
chrX_50557044_50557044	chrX	50557044	50557044	-	shroom4	nr_027121	42	2	46	11
chr8_27947747_27947747	chr8	27947747	27947747	+	elp3	nm_001284222	454	37	490	97
chr6_72130448_72130448	chr6	72130448	72130448	-	linc00472	nr_026807	80	4	70	18
chr8_27950583_27950583	chr8	27950583	27950583	+	elp3	nm_001284220	96	8	115	27
chr12_32832133_32832133	chr12	32832133	32832133	+	dnm1l	nm_012063	42	2	36	4
chr12_32832133_32832133	chr12	32832133	32832133	+	dnm1l	nm_012062	42	2	36	4
chr17_40996608_40996608	chr17	40996608	40996608	+	aoc2	nm_009590	79	1	77	17
chr6_31550202_31550202	chr6	31550202	31550202	-	ltb	nm_009588	237	10	235	37
chr17_25958173_25958173	chr17	25958173	25958173	+	lgals9	nm_009587	142	1	108	11
chr20_32899608_32899608	chr20	32899608	32899608	-	ahcy	nm_001161766	220	10	165	27
chr14_102228134_102228134	chr14	102228134	102228134	+	ppp2r5c	nm_001161726	258	27	299	63
chr1_158323485_158323485	chr1	158323485	158323485	+	cd1e	nm_001042583	108	5	92	13
chr22_46509565_46509565	chr22	46509565	46509565	+	mirlet7b	nr_029479	69	3	30	4
chr4_129732424_129732424	chr4	129732424	129732424	+	jade1	nm_001287442	31	4	30	5
chr6_31553955_31553955	chr6	31553955	31553955	+	lst1	nr_029462	316	13	264	45
chr1_143913160_143913160	chr1	143913160	143913160	-	fam72c	nm_001287385	1	0	5	0
chr1_206138439_206138439	chr1	206138439	206138439	+	fam72c	nm_001287385	1	0	0	0
chr17_66511534_66511534	chr17	66511534	66511534	+	prkar1a	nm_001276290	43	9	53	7
chrY_7569288_7569288	chrY	7569288	7569288	-	ttty16	nr_001552	28	2	34	2
chrY_8551919_8551919	chrY	8551919	8551919	-	ttty18	nr_001550	123	7	113	25
chrY_9160483_9160483	chrY	9160483	9160483	-	rbmy1a3p	nr_001547	57	4	78	7
chr20_45985633_45985633	chr20	45985633	45985633	-	zmynd8	nm_001281772	74	8	31	6
chr12_49121217_49121217	chr12	49121217	49121217	+	linc00935	nr_029448	287	20	380	75
chr4_66536213_66536213	chr4	66536213	66536213	-	epha5	nm_001281766	818	47	472	90
chr4_150999425_150999425	chr4	150999425	150999425	+	dclk2	nm_001040260	80	11	71	14
chr1_150979385_150979385	chr1	150979385	150979385	-	fam63a	nm_001040217	65	1	31	4
chr6_30655093_30655093	chr6	30655093	30655093	-	ppp1r18	nm_001134870	59	1	32	3
chr10_99344101_99344101	chr10	99344101	99344101	+	hoga1	nm_001134670	149	6	76	16
chr4_100485189_100485189	chr4	100485189	100485189	-	trmt10a	nm_001134666	85	2	151	38
chr13_108870716_108870716	chr13	108870716	108870716	-	lig4	nm_001098268	59	10	66	15
chr3_11178778_11178778	chr3	11178778	11178778	+	hrh1	nm_001098213	64	5	27	5
chr9_130469270_130469270	chr9	130469270	130469270	+	c9orf117	nm_001012502	236	4	179	35
chr7_54826939_54826939	chr7	54826939	54826939	-	sec61g	nm_001012456	82	5	81	14
chr11_124981604_124981604	chr11	124981604	124981604	-	tmem218	nm_001080546	139	16	110	25
chr17_1549083_1549083	chr17	1549083	1549083	-	scarf1	nr_102409	163	3	81	13
chr15_21071643_21071643	chr15	21071643	21071643	-	poteb	nr_102391	1	0	0	0
chr11_57886916_57886916	chr11	57886916	57886916	-	or9i1	nm_001005211	295	28	398	98
chr2_58468515_58468515	chr2	58468515	58468515	-	fancl	nm_001114636	134	24	183	51
chr3_156544095_156544095	chr3	156544095	156544095	+	lekr1	nm_001004316	62	4	90	21
chr6_30614815_30614815	chr6	30614815	30614815	+	c6orf136	nm_001109938	58	2	39	7
chr8_57123859_57123859	chr8	57123859	57123859	-	plag1	nm_001114634	428	49	379	98
chr15_39873279_39873279	chr15	39873279	39873279	+	thbs1	nm_003246	75	3	45	7
chr10_102505467_102505467	chr10	102505467	102505467	+	pax2	nm_003987	2004	60	1463	219
chr14_31343740_31343740	chr14	31343740	31343740	+	coch	nm_004086	1366	67	1333	258
chrX_100603957_100603957	chrX	100603957	100603957	-	timm8a	nm_004085	37	3	31	6
chr4_155484131_155484131	chr4	155484131	155484131	+	fgb	nm_005141	294	33	471	116
chr22_19109967_19109967	chr22	19109967	19109967	-	dgcr2	nm_005137	129	6	99	14
chr12_13043955_13043955	chr12	13043955	13043955	+	gprc5a	nm_003979	121	8	120	16
chr15_77287464_77287464	chr15	77287464	77287464	+	pstpip1	nm_003978	196	9	145	22
chr18_9614605_9614605	chr18	9614605	9614605	-	ppp4r1	nm_005134	52	2	50	6
chr19_10764936_10764936	chr19	10764936	10764936	+	ilf3	nm_012218	79	2	49	12
chr16_1843734_1843734	chr16	1843734	1843734	-	igfals	nm_004970	123	1	90	8
chr10_94333852_94333852	chr10	94333852	94333852	-	ide	nm_004969	51	2	51	12
chr20_5931204_5931204	chr20	5931204	5931204	-	trmt6	nm_001281467	71	8	49	7
chr12_27485786_27485786	chr12	27485786	27485786	+	arntl2	nm_001248003	58	2	74	18
chr4_82075311_82075311	chr4	82075311	82075311	-	prkg2	nm_001282482	108	9	135	33
chr4_82075311_82075311	chr4	82075311	82075311	-	prkg2	nm_001282481	108	9	135	33
chr4_82075311_82075311	chr4	82075311	82075311	-	prkg2	nm_001282480	108	9	135	33
chr14_103566480_103566480	chr14	103566480	103566480	+	exoc3l4	nm_001077594	1176	14	776	84
chr19_44860856_44860856	chr19	44860856	44860856	-	znf112	nm_001083335	73	1	74	11
chr3_50540892_50540892	chr3	50540892	50540892	-	cacna2d2	nm_006030	1895	80	1136	178
chr5_140797259_140797259	chr5	140797259	140797259	+	pcdhgb7	nm_018927	87	2	128	21
chr2_132202467_132202467	chr2	132202467	132202467	-	loc401010	nr_002826	100	1	69	5
chr14_78174413_78174413	chr14	78174413	78174413	+	slirp	nm_001267863	70	5	52	13
chr14_102785634_102785634	chr14	102785634	102785634	+	znf839	nm_001267828	72	3	40	6
chr14_78174413_78174413	chr14	78174413	78174413	+	slirp	nm_001267864	70	5	52	13
chr13_52980629_52980629	chr13	52980629	52980629	-	thsd1	nm_018676	45	3	51	8
chr1_2126214_2126214	chr1	2126214	2126214	-	c1orf86	nm_001256946	61	1	31	3
chr8_126444450_126444450	chr8	126444450	126444450	+	trib1	nm_001282985	56	0	34	11
chr2_242295663_242295663	chr2	242295663	242295663	+	farp2	nm_001282984	53	5	34	3
chr17_20224486_20224486	chr17	20224486	20224486	+	ccdc144cp	nr_023380	11	0	9	0
chr10_29891275_29891275	chr10	29891275	29891275	-	mir938	nr_030634	150	8	109	23
chr10_29834026_29834026	chr10	29834026	29834026	-	mir604	nr_030335	111	3	107	24
chr21_45660887_45660887	chr21	45660887	45660887	-	icoslg	nm_001283052	1972	27	1248	125
chr7_150076405_150076405	chr7	150076405	150076405	+	znf775	nm_173680	74	2	49	10
chr20_35807991_35807991	chr20	35807991	35807991	-	mroh8	nm_213631	54	3	27	6
chrX_49188103_49188103	chrX	49188103	49188103	+	gage2e	nm_001127200	0	0	0	0
chrX_49197606_49197606	chrX	49197606	49197606	+	gage2e	nm_001127200	0	0	0	0
chrX_49207159_49207159	chrX	49207159	49207159	+	gage2e	nm_001127200	4	1	2	1
chr18_37331959_37331959	chr18	37331959	37331959	-	linc00669	nr_024391	81	5	79	8
chr2_74875465_74875465	chr2	74875465	74875465	-	m1ap	nm_001281295	409	30	513	105
chr1_200379186_200379186	chr1	200379186	200379186	-	znf281	nm_001281294	68	2	65	11
chr7_72742234_72742234	chr7	72742234	72742234	+	fkbp6	nm_001281304	169	9	216	37
chr1_200379186_200379186	chr1	200379186	200379186	-	znf281	nm_001281293	68	2	65	11
chr9_94877756_94877756	chr9	94877756	94877756	-	sptlc1	nm_001281303	103	8	117	24
chr10_102790914_102790914	chr10	102790914	102790914	-	pdzd7	nm_001195263	241	9	120	31
chr19_18392466_18392466	chr19	18392466	18392466	-	jund	nm_001286968	46	2	27	2
chr11_17757494_17757494	chr11	17757494	17757494	+	kcnc1	nm_004976	1821	65	1151	209
chr20_48099181_48099181	chr20	48099181	48099181	-	kcnb1	nm_004975	677	30	221	31
chrX_15509432_15509432	chrX	15509432	15509432	-	pir-figf	nr_037859	43	4	48	11
chr14_50065414_50065414	chr14	50065414	50065414	+	lrr1	nr_037793	36	0	46	9
chr3_9958757_9958757	chr3	9958757	9958757	+	il17rc	nr_037807	83	3	50	8
chr4_142557748_142557748	chr4	142557748	142557748	+	il15	nr_037840	129	11	217	46
chr2_85788657_85788657	chr2	85788657	85788657	-	ggcx	nm_001142269	47	3	50	6
chr1_42921938_42921938	chr1	42921938	42921938	-	zmynd12	nm_001146192	87	6	61	10
chr10_105005643_105005643	chr10	105005643	105005643	+	rpel1	nm_001143909	174	14	268	46
chrX_144902865_144902865	chrX	144902865	144902865	+	slitrk2	nm_001144006	752	53	474	92
chr12_112563348_112563348	chr12	112563348	112563348	+	trafd1	nm_001143906	62	4	28	5
chr11_116643714_116643714	chr11	116643714	116643714	-	bud13	nm_001159736	62	1	47	8
chr6_41010456_41010456	chr6	41010456	41010456	+	tspo2	nm_001159726	362	19	260	56
chr11_47510576_47510576	chr11	47510576	47510576	-	celf1	nm_001025596	47	5	44	12
chr5_76506705_76506705	chr5	76506705	76506705	+	pde8b	nm_001029851	1418	95	1197	247
chr2_182521834_182521834	chr2	182521834	182521834	-	cerkl	nm_001030313	627	56	744	171
chr18_44556449_44556449	chr18	44556449	44556449	-	tceb3c	nm_145653	82	3	64	11
chr11_193079_193079	chr11	193079	193079	+	scgb1c1	nm_145651	1683	62	957	175
chr3_50310549_50310549	chr3	50310549	50310549	+	sema3b	nm_001290063	142	3	84	19
chr18_48494386_48494386	chr18	48494386	48494386	+	elac1	nm_018696	84	5	104	19
chr10_32856650_32856650	chr10	32856650	32856650	+	ccdc7	nm_024688	52	3	67	14
chr4_99579812_99579812	chr4	99579812	99579812	-	tspan5	nm_005723	84	4	70	17
chr10_115423829_115423829	chr10	115423829	115423829	-	nrap	nm_006175	269	37	459	102
chr19_51334779_51334779	chr19	51334779	51334779	-	klk15	nm_017509	537	23	347	68
chr5_177019212_177019212	chr5	177019212	177019212	+	tmed9	nm_017510	441	26	490	87
chr20_62526454_62526454	chr20	62526454	62526454	+	dnajc5	nm_025219	59	3	46	10
chr18_13218728_13218728	chr18	13218728	13218728	+	ldlrad4	nm_181482	981	45	1185	246
chr1_40916336_40916336	chr1	40916336	40916336	+	zfp69b	nm_023070	64	2	45	13
chr15_42651697_42651697	chr15	42651697	42651697	+	capn3	nm_173087	91	19	92	19
chr19_50706884_50706884	chr19	50706884	50706884	+	myh14	nm_024729	825	44	503	103
chr1_110009099_110009099	chr1	110009099	110009099	+	sypl2	nm_001040709	1457	99	1347	289
chr2_85829822_85829822	chr2	85829822	85829822	-	tmem150a	nm_001031738	64	3	44	8
chr19_56186560_56186560	chr19	56186560	56186560	+	epn1	nm_001130072	49	3	24	4
chr14_91580356_91580356	chr14	91580356	91580356	+	c14orf159	nm_001102369	41	6	58	11
chr20_14318313_14318313	chr20	14318313	14318313	-	flrt3	nm_198391	94	3	126	39
chr5_65440045_65440045	chr5	65440045	65440045	+	srek1	nm_001270493	87	8	74	16
chr19_14910948_14910948	chr19	14910948	14910948	-	or7c1	nm_198944	221	19	178	39
chr13_52585630_52585630	chr13	52585630	52585630	-	atp7b	nm_001243182	495	42	535	114
chr16_30076993_30076993	chr16	30076993	30076993	+	aldoa	nm_001243177	63	3	22	5
chr16_84220676_84220676	chr16	84220676	84220676	-	taf1c	nm_001243160	75	3	94	13
chr16_84220676_84220676	chr16	84220676	84220676	-	taf1c	nm_001243159	75	3	94	13
chr11_910874_910874	chr11	910874	910874	-	chid1	nm_001142677	84	1	34	3
chr11_910874_910874	chr11	910874	910874	-	chid1	nm_001142676	84	1	34	3
chr3_44754134_44754134	chr3	44754134	44754134	+	znf502	nm_001134442	117	9	123	23
chr3_111451326_111451326	chr3	111451326	111451326	+	phldb2	nm_001134437	70	8	84	31
chr11_104893895_104893895	chr11	104893895	104893895	-	casp5	nm_001136112	78	10	97	23
chr11_104893895_104893895	chr11	104893895	104893895	-	casp5	nm_001136110	78	10	97	23
chr10_35464514_35464514	chr10	35464514	35464514	+	crem	nm_182770	68	4	80	16
chr2_11273178_11273178	chr2	11273178	11273178	+	c2orf50	nm_182500	358	20	286	58
chr21_11098925_11098925	chr21	11098925	11098925	-	bage5	nm_182484	148	4	107	8
chrX_47863377_47863377	chrX	47863377	47863377	-	znf182	nm_001007088	12	1	29	5
chr15_85144248_85144248	chr15	85144248	85144248	+	zscan2	nm_001007072	75	1	79	22
chr9_35042204_35042204	chr9	35042204	35042204	+	c9orf131	nm_001040410	66	4	76	9
chr3_72937384_72937384	chr3	72937384	72937384	+	gxylt2	nm_001080393	61	4	88	23
chr19_46001730_46001730	chr19	46001730	46001730	+	ppm1n	nm_001080401	879	31	564	84
chr5_133340657_133340657	chr5	133340657	133340657	-	vdac1	nr_036624	62	1	32	4
chr15_32825942_32825942	chr15	32825942	32825942	-	whammp1	nr_036650	0	0	0	0
chr17_18528930_18528930	chr17	18528930	18528930	-	ccdc144b	nr_036647	74	6	95	13
chr15_80207598_80207598	chr15	80207598	80207598	-	st20	nm_001100879	49	8	65	10
chr8_144654928_144654928	chr8	144654928	144654928	-	mroh6	nm_001100878	449	5	218	26
chr11_75141674_75141674	chr11	75141674	75141674	-	klhl35	nm_001039548	829	26	651	108
chr2_210288770_210288770	chr2	210288770	210288770	+	map2	nm_001039538	367	32	416	90
chr17_4643223_4643223	chr17	4643223	4643223	-	cxcl16	nm_001100812	644	27	426	81
chr2_131862419_131862419	chr2	131862419	131862419	+	plekhb2	nm_001100623	71	8	47	7
chr17_71228760_71228760	chr17	71228760	71228760	+	c17orf80	nm_001100622	44	3	18	3
chr5_68856050_68856050	chr5	68856050	68856050	+	gtf2h2c	nm_001098728	3	0	2	0
chr19_39936185_39936185	chr19	39936185	39936185	+	supt5h	nm_001111020	38	4	30	7
chr5_42812024_42812024	chr5	42812024	42812024	-	sepp1	nm_001085486	158	12	201	49
chr13_114312513_114312513	chr13	114312513	114312513	-	atp4b	nm_000705	683	22	442	75
chr12_51740463_51740463	chr12	51740463	51740463	-	cela1	nm_001971	128	7	68	15
chr20_9495004_9495004	chr20	9495004	9495004	+	lamp5	nm_001199897	1333	77	1371	296
chr6_28220002_28220002	chr6	28220002	28220002	-	zkscan4	nm_019110	91	7	80	14
chr7_18535368_18535368	chr7	18535368	18535368	+	hdac9	nm_001204145	86	10	144	45
chr18_47808137_47808137	chr18	47808137	47808137	-	mbd1	nm_001204143	68	2	36	8
chrY_1337692_1337692	chrY	1337692	1337692	+	csf2ra	nm_001161529	0	0	0	0
chr14_68000007_68000007	chr14	68000007	68000007	+	plekhh1	nm_020715	376	31	463	86
chr3_107096187_107096187	chr3	107096187	107096187	+	ccdc54	nm_032600	106	15	146	38
chr5_40841409_40841409	chr5	40841409	40841409	+	card6	nm_032587	122	12	153	38
chr7_23053770_23053770	chr7	23053770	23053770	-	fam126a	nm_032581	76	4	49	8
chr16_4382224_4382224	chr16	4382224	4382224	+	glis2	nm_032575	48	2	25	6
chr7_94536948_94536948	chr7	94536948	94536948	+	ppp1r9a	nm_017650	762	65	645	125
chr6_130758261_130758261	chr6	130758261	130758261	+	tmem200a	nm_052913	77	7	102	22
chr13_84456528_84456528	chr13	84456528	84456528	-	slitrk1	nm_052910	1337	109	1165	238
chr5_176037131_176037131	chr5	176037131	176037131	-	gprin1	nm_052899	224	11	181	32
chr10_95242074_95242074	chr10	95242074	95242074	-	myof	nm_013451	39	1	35	7
chr1_24829386_24829386	chr1	24829386	24829386	+	rcan3	nm_013441	196	0	228	51
chr17_61777697_61777697	chr17	61777697	61777697	+	loc729683	nr_046273	165	0	61	12
chr2_97464014_97464014	chr2	97464014	97464014	+	mir3127	nr_036074	124	6	57	8
chr2_69330813_69330813	chr2	69330813	69330813	+	mir3126	nr_036073	58	3	72	14
chr2_12877492_12877492	chr2	12877492	12877492	+	mir3125	nr_036072	76	8	62	14
chr22_21319417_21319417	chr22	21319417	21319417	+	aifm3	nm_144704	950	31	627	104
chr11_74660232_74660232	chr11	74660232	74660232	-	xrra1	nm_182969	54	2	43	9
chr7_97501854_97501854	chr7	97501854	97501854	-	asns	nm_183356	74	3	93	22
chr3_184080770_184080770	chr3	184080770	184080770	+	polr2h	nm_001278699	77	5	56	5
chr11_67205153_67205153	chr11	67205153	67205153	-	ptprcap	nm_005608	57	1	36	6
chr15_72522063_72522063	chr15	72522063	72522063	-	pkm	nm_001206799	41	2	17	8
chr22_46486923_46486923	chr22	46486923	46486923	+	mir3619	nr_037413	65	3	29	5
chr22_20073268_20073268	chr22	20073268	20073268	+	mir3618	nr_037412	78	4	34	6
chr20_45795608_45795608	chr20	45795608	45795608	+	mir3616	nr_037410	78	2	72	13
chr17_72744751_72744751	chr17	72744751	72744751	+	mir3615	nr_037409	233	11	125	18
chrY_15592550_15592550	chrY	15592550	15592550	-	uty	nr_047615	29	1	28	7
chr6_149914751_149914751	chr6	149914751	149914751	+	rps18p9	nr_077247	40	2	50	12
chr6_45345788_45345788	chr6	45345788	45345788	-	supt3h	nm_003599	65	6	57	18
chr17_8113944_8113944	chr17	8113944	8113944	-	aurkb	nm_004217	46	3	50	13
chr11_22696318_22696318	chr11	22696318	22696318	+	gas2	nm_005256	396	41	727	155
chr15_45544427_45544427	chr15	45544427	45544427	+	slc28a2	nm_004212	73	5	127	29
chr7_32111045_32111045	chr7	32111045	32111045	-	pde1c	nm_005020	72	3	64	10
chr14_96152753_96152753	chr14	96152753	96152753	+	tcl1b	nm_004918	202	9	169	40
chr19_51413994_51413994	chr19	51413994	51413994	-	klk4	nm_004917	1206	71	658	115
chr21_43639266_43639266	chr21	43639266	43639266	+	abcg1	nm_004915	1450	75	1179	206
chr22_23487512_23487512	chr22	23487512	23487512	+	rab36	nm_004914	150	8	129	29
chr17_74722911_74722911	chr17	74722911	74722911	+	mettl23	nm_001206983	43	3	25	4
chr6_43737945_43737945	chr6	43737945	43737945	+	vegfa	nm_001025370	62	1	42	10
chrX_55208944_55208944	chrX	55208944	55208944	-	mtrnr2l10	nm_001190708	114	8	166	22
chr3_46735146_46735146	chr3	46735146	46735146	-	als2cl	nm_001190707	377	9	140	20
chr18_31803515_31803515	chr18	31803515	31803515	-	nol4	nm_001198548	1434	67	1296	246
chr1_19578053_19578053	chr1	19578053	19578053	-	emc1	nm_001271429	60	5	37	8
chr7_99680171_99680171	chr7	99680171	99680171	-	znf3	nm_001278287	68	2	57	4
chr2_210867288_210867288	chr2	210867288	210867288	+	rpe	nm_001278285	68	6	41	13
chr5_79647785_79647785	chr5	79647785	79647785	-	crsp8p	nr_003665	143	5	172	42
chr17_18161870_18161870	chr17	18161870	18161870	-	flii	nm_001256264	64	3	33	6
chrX_68385365_68385365	chrX	68385365	68385365	-	pja1	nm_001032396	30	1	64	9
chr2_210867288_210867288	chr2	210867288	210867288	+	rpe	nm_001278288	68	6	41	13
chrX_65238711_65238711	chrX	65238711	65238711	+	mir223	nr_029637	250	20	271	61
chrX_45606530_45606530	chrX	45606530	45606530	-	mir222	nr_029636	31	3	33	10
chr16_2321747_2321747	chr16	2321747	2321747	+	mir940	nr_030636	109	2	81	16
chrX_45605694_45605694	chrX	45605694	45605694	-	mir221	nr_029635	32	3	28	9
chr8_145619445_145619445	chr8	145619445	145619445	-	mir939	nr_030635	42	0	23	6
chr1_32110218_32110218	chr1	32110218	32110218	-	pef1	nr_033688	52	4	60	15
chr6_33175611_33175611	chr6	33175611	33175611	+	mir219-1	nr_029633	104	10	58	12
chr5_168195260_168195260	chr5	168195260	168195260	-	mir218-2	nr_029632	140	5	138	30
chr19_54485560_54485560	chr19	54485560	54485560	+	mir935	nr_030632	1459	58	1039	176
chr4_20529897_20529897	chr4	20529897	20529897	+	mir218-1	nr_029631	83	6	79	18
chrX_135633036_135633036	chrX	135633036	135633036	+	mir934	nr_030631	213	19	307	59
chr2_56210211_56210211	chr2	56210211	56210211	-	mir217	nr_029630	80	10	146	29
chrX_146340358_146340358	chrX	146340358	146340358	-	mir509-3	nr_030629	17	1	29	4
chr6_157100865_157100865	chr6	157100865	157100865	-	mir4466	nr_039676	37	0	16	3
chrX_146341244_146341244	chrX	146341244	146341244	-	mir509-3	nr_030629	19	1	29	4
chrX_146342133_146342133	chrX	146342133	146342133	-	mir509-3	nr_030629	23	1	25	1
chr2_56216194_56216194	chr2	56216194	56216194	-	mir216a	nr_029629	92	5	120	19
chr2_176032437_176032437	chr2	176032437	176032437	-	mir933	nr_030630	40	3	43	8
chr1_220291304_220291304	chr1	220291304	220291304	-	mir215	nr_029628	50	1	63	20
chr1_172108047_172108047	chr1	172108047	172108047	-	mir214	nr_029627	47	3	59	12
chr3_197401447_197401447	chr3	197401447	197401447	-	mir922	nr_030627	83	1	58	15
chr1_198828282_198828282	chr1	198828282	198828282	-	mir181a1	nr_029626	71	10	96	18
chr1_166124035_166124035	chr1	166124035	166124035	-	mir921	nr_030626	205	14	128	27
chrX_39186616_39186616	chrX	39186616	39186616	-	rp11-265p11.2	nr_038968	460	50	399	100
chr14_23857875_23857875	chr14	23857875	23857875	-	mir208a	nr_029595	961	29	719	149
chr14_101514237_101514237	chr14	101514237	101514237	+	mir889	nr_030595	140	5	67	28
chr9_123007328_123007328	chr9	123007328	123007328	-	mir147a	nr_029604	224	15	235	45
chr7_45039344_45039344	chr7	45039344	45039344	+	ccm2	nr_030770	47	4	44	6
chr1_28832454_28832454	chr1	28832454	28832454	+	rcc1	nr_030726	37	4	27	10
chr7_57247863_57247863	chr7	57247863	57247863	-	gusbp10	nr_030766	69	1	33	5
chr11_73882064_73882064	chr11	73882064	73882064	-	c2cd3	nm_001286577	38	5	42	9
chrY_15592550_15592550	chrY	15592550	15592550	-	uty	nr_047637	29	1	28	7
chrY_15592550_15592550	chrY	15592550	15592550	-	uty	nr_047644	29	1	28	7
chrY_15592550_15592550	chrY	15592550	15592550	-	uty	nr_047643	29	1	28	7
chr15_22082803_22082803	chr15	22082803	22082803	-	poteb	nr_102391	1	0	0	0
chr15_21071643_21071643	chr15	21071643	21071643	-	poteb2	nr_102390	1	0	0	0
chr15_22082803_22082803	chr15	22082803	22082803	-	poteb2	nr_102390	1	0	0	0
chr1_44173203_44173203	chr1	44173203	44173203	+	st3gal3	nr_073018	53	6	35	5
chr3_51705642_51705642	chr3	51705642	51705642	+	tex264	nr_103463	95	2	44	9
chr2_74682149_74682149	chr2	74682149	74682149	+	ino80b-wbp1	nr_037849	151	12	167	45
chr5_180257956_180257956	chr5	180257956	180257956	+	linc00847	nr_045679	63	2	34	4
chr20_30016983_30016983	chr20	30016983	30016983	-	defb122	nr_045677	202	16	300	61
chr10_49864310_49864310	chr10	49864310	49864310	-	arhgap22	nr_045675	159	8	148	32
chr11_60739112_60739112	chr11	60739112	60739112	+	cd6	nr_045638	883	51	649	107
chr2_69664760_69664760	chr2	69664760	69664760	-	nfu1	nr_045632	50	6	36	8
chr2_69664760_69664760	chr2	69664760	69664760	-	nfu1	nr_045631	50	6	36	8
chr2_167343481_167343481	chr2	167343481	167343481	-	scn7a	nr_045628	362	40	513	136
chr10_69865873_69865873	chr10	69865873	69865873	+	mypn	nr_045662	52	4	42	10
chrY_15592550_15592550	chrY	15592550	15592550	-	uty	nr_047625	29	1	28	7
chr22_18958010_18958010	chr22	18958010	18958010	+	dgcr5	nr_045121	638	10	396	36
chr2_20068614_20068614	chr2	20068614	20068614	+	linc00954	nr_033875	319	16	303	61
chr16_61554_61554	chr16	61554	61554	+	ddx11l10	nr_045117	6	0	3	0
chr5_131746464_131746464	chr5	131746464	131746464	+	c5orf56	nr_045116	76	6	47	12
chr4_56686236_56686236	chr4	56686236	56686236	+	loc644145	nr_003935	402	43	675	151
chr1_40025370_40025370	chr1	40025370	40025370	-	ppiel	nr_003929	63	5	58	10
chr1_111823145_111823145	chr1	111823145	111823145	+	chiap2	nr_003928	293	24	361	67
chr11_129939715_129939715	chr11	129939715	129939715	+	aplp2	nr_024515	91	9	58	13
chr20_61870130_61870130	chr20	61870130	61870130	+	mir3196	nr_036163	490	11	312	38
chr20_30194988_30194988	chr20	30194988	30194988	+	mir3193	nr_036161	59	2	28	4
chr8_39380508_39380508	chr8	39380508	39380508	-	adam3a	nr_024106	128	7	148	35
chr19_47730276_47730276	chr19	47730276	47730276	-	mir3191	nr_036159	61	3	31	6
chr19_47730198_47730198	chr19	47730198	47730198	+	mir3190	nr_036158	61	3	31	6
chr1_16957401_16957401	chr1	16957401	16957401	-	croccp2	nr_026752	102	1	51	2
chr2_234763212_234763212	chr2	234763212	234763212	-	hjurp	nm_001282962	74	6	64	18
chr14_57960581_57960581	chr14	57960581	57960581	-	c14orf105	nm_001283059	349	42	432	89
chr1_104615644_104615644	chr1	104615644	104615644	+	loc100129138	nr_033990	67	8	98	30
chr7_102158224_102158224	chr7	102158224	102158224	-	rasa4b	nm_001277335	3	0	3	0
chr15_91260557_91260557	chr15	91260557	91260557	+	blm	nm_001287246	47	6	59	14
chr12_42877797_42877797	chr12	42877797	42877797	-	prickle1	nm_001144882	223	15	471	116
chr15_71184781_71184781	chr15	71184781	71184781	+	lrrc49	nm_001199018	77	7	62	11
chr6_43395291_43395291	chr6	43395291	43395291	+	abcc10	nm_001198934	47	3	44	6
chr4_1202750_1202750	chr4	1202750	1202750	-	spon2	nm_001199021	79	0	28	9
chr14_94759608_94759608	chr14	94759608	94759608	-	serpina10	nm_001100607	565	27	488	111
chr3_43328003_43328003	chr3	43328003	43328003	+	snrk	nm_001100594	387	34	472	111
chr7_6523849_6523849	chr7	6523849	6523849	-	kdelr2	nm_001100603	42	2	30	5
chrX_152989582_152989582	chrX	152989582	152989582	-	bcap31	nm_001139441	21	2	17	6
chr6_134497070_134497070	chr6	134497070	134497070	-	sgk1	nm_001143678	67	3	54	9
chr10_74283744_74283744	chr10	74283744	74283744	-	micu1	nm_001195519	66	7	76	21
chr1_151138424_151138424	chr1	151138424	151138424	-	lysmd1	nm_001136543	61	2	27	7
chr4_157997554_157997554	chr4	157997554	157997554	+	glrb	nm_001166060	86	6	118	18
chr19_57999078_57999078	chr19	57999078	57999078	+	znf419	nm_001098492	119	11	147	31
chr19_57999078_57999078	chr19	57999078	57999078	+	znf419	nm_001098491	119	11	147	31
chr4_191012062_191012062	chr4	191012062	191012062	+	dux4l3	nm_001164467	5	0	1	1
chr11_101000544_101000544	chr11	101000544	101000544	-	pgr	nm_000926	1468	103	1404	244
chr13_62603681_62603681	chr13	62603681	62603681	-	linc00358	nr_046995	81	12	88	13
chr13_108487806_108487806	chr13	108487806	108487806	-	fam155a-it1	nr_046848	89	8	107	21
chr2_20792308_20792308	chr2	20792308	20792308	-	hs1bp3-it1	nr_046836	107	1	54	10
chr13_113409045_113409045	chr13	113409045	113409045	-	atp11a-as1	nr_046661	134	8	149	23
chr3_149095564_149095564	chr3	149095564	149095564	+	tm4sf1-as1	nr_046650	39	1	36	8
chr6_117586720_117586720	chr6	117586720	117586720	+	vgll2	nm_182645	2031	128	1755	351
chr2_135676391_135676391	chr2	135676391	135676391	+	ccnt2	nm_058241	43	1	40	9
chr8_124553493_124553493	chr8	124553493	124553493	-	fbxo32	nm_058229	117	2	176	34
chr1_43855483_43855483	chr1	43855483	43855483	-	med8	nm_052877	62	7	37	10
chr19_6110664_6110664	chr19	6110664	6110664	-	rfx2	nm_000635	44	3	83	17
chr2_219031716_219031716	chr2	219031716	219031716	-	cxcr1	nm_000634	807	53	842	181
chr16_31271287_31271287	chr16	31271287	31271287	+	itgam	nm_000632	598	41	635	117
chr10_99894380_99894380	chr10	99894380	99894380	+	r3hcc1l	nm_014472	82	1	62	11
chr17_38574202_38574202	chr17	38574202	38574202	-	top2a	nm_001067	78	2	44	4
chr3_119182529_119182529	chr3	119182529	119182529	-	tmem39a	nr_073506	60	2	56	8
chr17_20615758_20615758	chr17	20615758	20615758	+	loc100287072	nr_073509	167	13	262	32
chr5_137774689_137774689	chr5	137774689	137774689	+	reep2	nr_073449	129	11	53	12
chr5_137774689_137774689	chr5	137774689	137774689	+	reep2	nr_073448	129	11	53	12
chr21_36953062_36953062	chr21	36953062	36953062	-	loc100506403	nr_073512	84	10	110	32
chr8_12034776_12034776	chr8	12034776	12034776	-	fam90a2p	nr_046354	8	1	12	0
chr17_42925269_42925269	chr17	42925269	42925269	+	higd1b	nr_073504	95	4	124	27
chr1_172413230_172413230	chr1	172413230	172413230	-	pigc	nm_002642	112	11	94	25
chrX_15353676_15353676	chrX	15353676	15353676	-	piga	nm_002641	99	14	203	46
chr18_61144143_61144143	chr18	61144143	61144143	+	serpinb5	nm_002639	178	16	198	44
chr18_61637262_61637262	chr18	61637262	61637262	+	serpinb8	nm_002640	64	3	57	12
chr9_130565136_130565136	chr9	130565136	130565136	+	fpgs	nm_004957	52	2	35	6
chr22_50913464_50913464	chr22	50913464	50913464	-	sbf1	nm_002972	101	6	50	13
chr10_50821153_50821153	chr10	50821153	50821153	+	chat	nm_020985	2566	61	1552	238
chr19_9434447_9434447	chr19	9434447	9434447	+	znf559	nm_032497	34	3	26	4
chr12_57873633_57873633	chr12	57873633	57873633	-	arhgap9	nm_032496	1043	72	864	162
chr13_46276438_46276438	chr13	46276438	46276438	+	spert	nm_152719	816	68	833	168
chr11_60524339_60524339	chr11	60524339	60524339	+	ms4a15	nm_152717	546	29	519	86
chr19_3933100_3933100	chr19	3933100	3933100	+	nmrk2	nm_170678	1002	31	764	108
chr2_113012664_113012664	chr2	113012664	113012664	-	zc3h8	nm_032494	80	7	92	25
chr20_56100163_56100163	chr20	56100163	56100163	-	ctcfl	nm_001269055	428	21	305	64
chr16_47177936_47177936	chr16	47177936	47177936	-	neto2	nm_001201477	157	14	163	31
chr18_33552587_33552587	chr18	33552587	33552587	+	c18orf21	nm_001201476	50	3	37	4
chr1_32716839_32716839	chr1	32716839	32716839	+	lck	nm_005356	272	7	157	32
chr1_53527723_53527723	chr1	53527723	53527723	+	podn	nm_001199080	217	6	98	20
chr10_51371331_51371331	chr10	51371331	51371331	-	parg	nm_003631	0	0	0	0
chr6_28367544_28367544	chr6	28367544	28367544	-	zscan12	nm_001163391	122	7	156	36
chrX_154688276_154688276	chrX	154688276	154688276	-	f8a1	nm_012151	0	0	0	0
chr9_34458749_34458749	chr9	34458749	34458749	+	dnai1	nm_012144	205	12	242	46
chr6_109804440_109804440	chr6	109804440	109804440	-	zbtb24	nm_014797	109	7	125	24
chr20_62680979_62680979	chr20	62680979	62680979	-	sox18	nm_018419	1174	16	799	84
chr10_47181688_47181688	chr10	47181688	47181688	-	fam25c	nm_001137548	0	0	0	0
chr10_48247661_48247661	chr10	48247661	48247661	+	fam25c	nm_001137548	0	0	0	0
chr8_21988565_21988565	chr8	21988565	21988565	-	hr	nm_018411	1015	27	243	35
chr3_111697722_111697722	chr3	111697722	111697722	+	abhd10	nm_018394	64	1	67	22
chr2_145277958_145277958	chr2	145277958	145277958	-	zeb2	nm_014795	48	6	73	16
chr17_6544247_6544247	chr17	6544247	6544247	-	kiaa0753	nm_014804	68	3	43	3
chr12_68619571_68619571	chr12	68619571	68619571	-	il26	nm_018402	49	4	90	17
chr11_123525315_123525315	chr11	123525315	123525315	-	scn3b	nm_018400	909	64	864	184
chr11_45826640_45826640	chr11	45826640	45826640	+	slc35c1	nm_018389	106	2	67	14
chr19_10196805_10196805	chr19	10196805	10196805	+	c19orf66	nm_018381	251	8	219	45
chr22_50528684_50528684	chr22	50528684	50528684	+	mov10l1	nm_001164105	825	42	740	154
chr19_52901120_52901120	chr19	52901120	52901120	+	znf528	nm_032423	69	3	37	9
chr10_14996431_14996431	chr10	14996431	14996431	-	dclre1c	nm_022487	70	5	43	8
chr9_114937577_114937577	chr9	114937577	114937577	-	susd1	nm_022486	134	10	88	14
chr8_110661132_110661132	chr8	110661132	110661132	-	sybu	nm_017786	296	32	520	124
chr3_157217445_157217445	chr3	157217445	157217445	-	veph1	nm_024621	100	6	183	42
chr19_13068068_13068068	chr19	13068068	13068068	-	gadd45gip1	nm_052850	48	2	40	11
chr19_41816093_41816093	chr19	41816093	41816093	+	ccdc97	nm_052848	59	4	42	9
chr7_38217807_38217807	chr7	38217807	38217807	+	stard3nl	nm_032016	78	7	78	15
chr20_39995498_39995498	chr20	39995498	39995498	-	emilin3	nm_052846	1633	59	1006	123
chr11_94800040_94800040	chr11	94800040	94800040	+	srsf8	nm_032102	51	4	74	12
chr18_3451402_3451402	chr18	3451402	3451402	+	tgif1	nm_170695	40	1	29	3
chr20_42187634_42187634	chr20	42187634	42187634	+	sgk2	nm_170693	289	29	237	45
chr17_47925379_47925379	chr17	47925379	47925379	-	tac4	nm_170685	171	6	126	24
chr11_119039421_119039421	chr11	119039421	119039421	+	nlrx1	nm_001282143	57	2	61	12
chrX_48901043_48901043	chrX	48901043	48901043	-	tfe3	nm_001282142	25	1	14	6
chrX_65384071_65384071	chrX	65384071	65384071	+	heph	nm_001282141	44	7	44	12
chr6_78400372_78400372	chr6	78400372	78400372	+	mei4	nm_001282136	152	13	193	32
chr17_28088450_28088450	chr17	28088450	28088450	-	ssh2	nm_001282131	67	5	66	10
chr2_75059781_75059781	chr2	75059781	75059781	+	hk2	nm_000189	62	5	85	18
chr2_238395861_238395861	chr2	238395861	238395861	+	mlph	nm_001281473	160	6	99	18
chr1_32671235_32671235	chr1	32671235	32671235	+	iqcc	nm_001160042	88	3	69	12
chr8_22844929_22844929	chr8	22844929	22844929	+	rhobtb2	nm_001160036	174	7	92	20
chr8_30890777_30890777	chr8	30890777	30890777	+	wrn	nm_000553	516	47	498	91
chr9_35096546_35096546	chr9	35096546	35096546	-	pigo	nm_001201484	59	4	40	10
chr2_109204921_109204921	chr2	109204921	109204921	+	lims1	nm_001193488	54	4	55	12
chr17_35766902_35766902	chr17	35766902	35766902	-	acaca	nm_198839	56	1	35	7
chr5_68710938_68710938	chr5	68710938	68710938	+	marveld2	nm_001244734	65	3	46	8
chr10_64133915_64133915	chr10	64133915	64133915	+	znf365	nm_199451	301	30	193	43
chr2_198364998_198364998	chr2	198364998	198364998	-	hspd1	nm_199440	53	4	48	2
chr13_98795351_98795351	chr13	98795351	98795351	+	farp1	nm_001001715	61	2	83	17
chr21_40817796_40817796	chr21	40817796	40817796	+	sh3bgr	nm_001001713	66	3	67	12
chr19_45582517_45582517	chr19	45582517	45582517	+	gemin7	nm_001007270	120	2	64	13
chr15_22736245_22736245	chr15	22736245	22736245	+	golga6l1	nm_001001413	0	0	0	0
chr10_29577989_29577989	chr10	29577989	29577989	+	lyzl1	nm_032517	236	25	357	60
chr20_33146500_33146500	chr20	33146500	33146500	+	map1lc3a	nm_032514	73	3	44	9
chr8_33342684_33342684	chr8	33342684	33342684	+	mak16	nm_032509	60	3	39	11
chr20_33999945_33999945	chr20	33999945	33999945	-	uqcc1	nm_018244	55	6	53	18
chr14_92572965_92572965	chr14	92572965	92572965	-	atxn3	nm_030660	102	2	117	23
chr19_51891210_51891210	chr19	51891210	51891210	-	lim2	nm_030657	309	14	207	34
chr6_32119720_32119720	chr6	32119720	32119720	-	prrt1	nm_030651	736	23	487	69
chrY_4868266_4868266	chrY	4868266	4868266	+	pcdh11y	nm_032971	48	2	74	10
chr6_43265997_43265997	chr6	43265997	43265997	+	slc22a7	nm_153320	992	57	734	141
chr3_50341032_50341032	chr3	50341032	50341032	-	hyal1	nm_153283	54	4	45	6
chr1_1310562_1310562	chr1	1310562	1310562	-	aurkaip1	nm_001127230	50	3	21	3
chr3_190580465_190580465	chr3	190580465	190580465	-	gmnc	nm_001146686	272	28	237	63
chr14_21567095_21567095	chr14	21567095	21567095	+	tmem253	nm_001146683	94	5	55	12
chr3_119963142_119963142	chr3	119963142	119963142	-	gpr156	nm_001168271	252	20	302	67
chr11_33744498_33744498	chr11	33744498	33744498	-	cd59	nm_001127227	59	2	56	16
chr11_33744273_33744273	chr11	33744273	33744273	-	cd59	nm_001127226	62	2	55	17
chrX_48769235_48769235	chrX	48769235	48769235	-	slc35a2	nm_001282647	35	2	28	4
chrX_106871653_106871653	chrX	106871653	106871653	+	prps1	nm_001204402	26	2	36	10
chr11_15991167_15991167	chr11	15991167	15991167	-	mir6073	nr_106721	71	8	61	18
chr15_80873443_80873443	chr15	80873443	80873443	+	mir5572	nr_049837	108	4	62	13
chr2_178077453_178077453	chr2	178077453	178077453	+	mir4444-2	nr_049831	30	2	32	8
chr3_75263626_75263626	chr3	75263626	75263626	+	mir4444-2	nr_049831	209	19	346	72
chr1_19638739_19638739	chr1	19638739	19638739	+	pqlc2	nr_109848	62	2	50	7
chr8_145112283_145112283	chr8	145112283	145112283	-	mir6846	nr_106905	155	2	60	5
chr6_43402279_43402279	chr6	43402279	43402279	+	mir6780b	nr_106894	84	3	37	11
chr8_144919988_144919988	chr8	144919988	144919988	-	mir6845	nr_106904	68	1	24	1
chrX_49344540_49344540	chrX	49344540	49344540	+	gage12d	nm_001127199	0	0	0	0
chr17_76124861_76124861	chr17	76124861	76124861	-	tmc6	nm_001127198	1382	36	891	125
chr17_62097994_62097994	chr17	62097994	62097994	-	icam2	nm_001099786	242	13	299	53
chr19_11708234_11708234	chr19	11708234	11708234	+	znf627	nm_001290085	58	4	39	4
chr19_18197813_18197813	chr19	18197813	18197813	-	il12rb1	nm_001290023	236	18	180	26
chr2_165812035_165812035	chr2	165812035	165812035	-	slc38a11	nm_001199148	223	26	301	52
chr8_74884143_74884143	chr8	74884143	74884143	-	tceb1	nm_001204861	48	4	24	3
chr2_44001177_44001177	chr2	44001177	44001177	+	dync2li1	nm_001193464	83	6	103	22
chr11_60102354_60102354	chr11	60102354	60102354	+	ms4a6e	nm_139249	102	14	138	29
chr3_160473995_160473995	chr3	160473995	160473995	+	ppm1l	nm_139245	656	44	537	116
chr4_123300120_123300120	chr4	123300120	123300120	+	adad1	nm_139243	143	23	189	40
chr1_6526255_6526255	chr1	6526255	6526255	-	tnfrsf25	nm_148966	149	0	116	14
[truncated: 46,220 more rows]
