# Supplementary material for: PLZF targets developmental enhancers for activation during osteogenic differentiation of human mesenchymal stem cells
Source: eLife. 2019 Jan 23;8:e40364. doi: 10.7554/eLife.40364 (PMC6344081; doi:10.7554/eLife.40364)
Supplement: Supplementary file 4. [file elife-40364-supp4.xlsx]

## Sheet: PLZF Peaks at day10
PLZF Peak position
Chromosome	Peak Start	Peak End
chr22	28261930	28262567
chr16	88340421	88341298
chr11	114049741	114050646
chr7	130644806	130645600
chr19	8420294	8421066
chr5	55860506	55861424
chr2	106005105	106006073
chr9	16627788	16628543
chr2	38029979	38030876
chr18	43382642	43383603
chr11	85885006	85885926
chr19	42772433	42773402
chr2	33377883	33378559
chr11	35604501	35605128
chr8	118751191	118751935
chr12	113342243	113342900
chr1	8149651	8150862
chr10	104542352	104543425
chr16	56640353	56641607
chr2	159992111	159993072
chr6	75381048	75381939
chr13	24364699	24365476
chr1	172715237	172715931
chr13	45478983	45479683
chr10	104536576	104537257
chr16	29868213	29869063
chr18	20805207	20805861
chr11	114030457	114031333
chr2	223964542	223965222
chr12	108765384	108766305
chr16	24657353	24658137
chr15	26128856	26129486
chr7	80263686	80264333
chr1	67029737	67030564
chr6	16929869	16930511
chr10	60384622	60385451
chr7	55392971	55393711
chr11	114024987	114025708
chr5	38464077	38464804
chr5	75986692	75987378
chr8	69671817	69672551
chr2	122259688	122260387
chr1	235106148	235107203
chr2	145213995	145214639
chr1	180499515	180500171
chr13	52217111	52218523
chr15	67316543	67317236
chr2	208103569	208104684
chr2	28619218	28620019
chr12	66285661	66286379
chr2	153288603	153289245
chr13	40638819	40639434
chr15	67397528	67398242
chr12	91534018	91534702
chr5	78731942	78732541
chr10	63752314	63753044
chr10	104562732	104563397
chr1	41433114	41433920
chr5	36657512	36658297
chr18	71983807	71984503
chr15	59587372	59588823
chr15	62898433	62899100
chr5	159213867	159214773
chr8	60607080	60607748
chr1	8137106	8137791
chr2	161886876	161887677
chr1	200384823	200385655
chr21	35708633	35709523
chr3	149104221	149105031
chr11	86195115	86195726
chr8	6462691	6463377
chr9	99276221	99277620
chr6	44025940	44026709
chr20	48925060	48926051
chr2	214883806	214884429
chr11	6353164	6353795
chr9	110904851	110905609
chr10	103769433	103770011
chr1	192982115	192982668
chr6	147235609	147236414
chr9	110037152	110037776
chr6	130030427	130031576
chr3	124597404	124598360
chr15	36166333	36166939
chr12	109219976	109220810
chr2	208123036	208123759
chr16	66223684	66224475
chr11	26968816	26969628
chr2	109741776	109742567
chrx	13450421	13451089
chr8	38483554	38484210
chr19	16389929	16390432
chr6	152467386	152468058
chr13	51103091	51103939
chr14	92977886	92978614
chr7	114649592	114650282
chr11	12011746	12012400
chr16	53698726	53699468
chr14	81867013	81867727
chr12	93521167	93521850
chr8	38517393	38518003
chr20	45582807	45583578
chr2	102577426	102578867
chr2	147808715	147809312
chr15	40120672	40121372
chr1	56184297	56185020
chr10	64675899	64676409
chr7	137352245	137352901
chr14	50527485	50528196
chr6	170018599	170019452
chr16	78218230	78218912
chr5	106724112	106725260
chr18	39618856	39619458
chr2	204668760	204669405
chr8	128864051	128864784
chr1	8064950	8065673
chr5	52658158	52658928
chr10	123702160	123702736
chr4	83522661	83523328
chr2	112375451	112376564
chr2	26101030	26101596
chr16	28175351	28176022
chr7	43012290	43013439
chr9	118706551	118707376
chr2	69469642	69470366
chr11	114068476	114069309
chr8	121396402	121396936
chr10	31551495	31552254
chr13	74777554	74778217
chr5	32810804	32811519
chr20	46196635	46197233
chr3	112529979	112530887
chr9	103191456	103192140
chr8	128403257	128403922
chr10	29935205	29936351
chr8	26322923	26323723
chr3	177196051	177196821
chr14	64541607	64542238
chr2	210338404	210339050
chr10	33482852	33483447
chr5	32027875	32028641
chr17	28004036	28004702
chr12	46949780	46950416
chr16	20917767	20918520
chr1	103749524	103750500
chr13	29327504	29328082
chr13	45495902	45496963
chr6	133872996	133873726
chr15	39607343	39607726
chr17	48463600	48464258
chr2	204549711	204550551
chr3	177185981	177186597
chr13	114559520	114560183
chr7	13959731	13960434
chr8	129188806	129189776
chr5	90607247	90608450
chrx	150994497	150995104
chr9	114803837	114804653
chr3	155108976	155109788
chr13	86071682	86072228
chr2	71763483	71764063
chr10	59917100	59917734
chr11	131934859	131935326
chr8	142053362	142053884
chr5	41193660	41194341
chr3	43750393	43750985
chr18	457026	458068
chr5	175236793	175237401
chr15	25982175	25982961
chr4	184557978	184558589
chr11	66738137	66738837
chr3	58033439	58034099
chr11	86448664	86449286
chr21	16367758	16368355
chrx	109330661	109331254
chr13	111013517	111014178
chr7	26744273	26744910
chr1	21476282	21476748
chr2	74793658	74794330
chr3	145995548	145996200
chr4	88000101	88000805
chr11	61739930	61740576
chr6	132297499	132298201
chr1	211210298	211211070
chr4	138659517	138660230
chr5	91887742	91888915
chr7	47331044	47331576
chr7	129932556	129933344
chr1	42238659	42239427
chr16	53124413	53125522
chr15	67417723	67418604
chr1	234859536	234860676
chr6	141178808	141179686
chr11	47884643	47885384
chr4	158972400	158973135
chr12	60093340	60093916
chr3	157077699	157078299
chr6	112043151	112043884
chr2	5906076	5906765
chr2	37816983	37817869
chr2	47082177	47082905
chr2	47058381	47059226
chr2	109941248	109941926
chr14	62028363	62028977
chr17	58547085	58547573
chr10	17044011	17044756
chr6	158185542	158186086
chr2	28325243	28325801
chr2	228682856	228683901
chr12	27338303	27338883
chr7	139553295	139554426
chr1	172113655	172114576
chr11	86458167	86458689
chr8	95319621	95320202
chr9	79269447	79270217
chr2	101358526	101359790
chr1	225843048	225843601
chr3	157000227	157000926
chr8	131074142	131074726
chr10	70821058	70821624
chr15	58843849	58844351
chr2	138726718	138727372
chr7	127855208	127855951
chr6	12354579	12355316
chr5	34715780	34716390
chr9	89598291	89599353
chr20	45962738	45963331
chr15	26076085	26076818
chr7	19444385	19445197
chr3	16101552	16102400
chr5	124179185	124179779
chr2	161224234	161224903
chr3	104671218	104671958
chr11	9548947	9549626
chr14	56054881	56055614
chr2	62638387	62639251
chr5	157542462	157543416
chr12	46782921	46783494
chr11	35121331	35121959
chr8	54857314	54858007
chr8	67041915	67042965
chr22	34054640	34055269
chr11	131941741	131942491
chr8	26466766	26467373
chr2	47194158	47194841
chr1	208357276	208358237
chr10	74003407	74004151
chr17	38705527	38706105
chr13	46928749	46929377
chr21	46469982	46471001
chr12	66025321	66025976
chr18	42904304	42905091
chr9	21549161	21550020
chr3	185376162	185376840
chr16	11198655	11199318
chr12	117032813	117033522
chr1	62103795	62104519
chr1	33564710	33565421
chr9	113758685	113759476
chr12	109882851	109883533
chr4	86395840	86396542
chr2	204608015	204608807
chr4	148499045	148499719
chr6	22880927	22881726
chr3	124781696	124782454
chr13	49142023	49142521
chr16	29955362	29955751
chr3	12266234	12266746
chr12	57505692	57506331
chr6	159605568	159606101
chr5	172295713	172296601
chr2	19172210	19173236
chr12	120637498	120638037
chr3	40918906	40919876
chr3	184504067	184504621
chr5	148514992	148515507
chr9	101751758	101752347
chr9	38025745	38026522
chr9	16704633	16705661
chr7	117222171	117222861
chr7	79082858	79083390
chr13	27135745	27136408
chr1	27049932	27050485
chr12	66042746	66043276
chr17	33581273	33581888
chr16	54681432	54682076
chr3	183088568	183088955
chr20	46093156	46093701
chr11	65188401	65189149
chr4	148024449	148025146
chr12	50640789	50641357
chrx	108595108	108595825
chr1	44515429	44516134
chr18	3453644	3454297
chr6	34358656	34359235
chr5	36450639	36451271
chr10	74002376	74002974
chr7	22616918	22617689
chr1	151952716	151953426
chr7	19361580	19362200
chr3	112497267	112497948
chr10	91087949	91088301
chr18	42746099	42746853
chr17	76338915	76339590
chr3	186732265	186732885
chr21	39654852	39655343
chr3	158427344	158427801
chr9	735145	735539
chr2	235889711	235890507
chr3	146521401	146521917
chr10	73769040	73769689
chr9	114812771	114813356
chr4	77055114	77055685
chr19	47263053	47263737
chr2	234395594	234396162
chr19	4870054	4870602
chr8	133911411	133912089
chr8	38384698	38386069
chr10	125607090	125607774
chr5	131007881	131008508
chr7	32132908	32133535
chr15	67175510	67176214
chr10	65441862	65442436
chr2	135018101	135018844
chr2	86299192	86300001
chr13	64055448	64055876
chr12	127153135	127153526
chr4	26511626	26512355
chr22	24699419	24699929
chr20	36904151	36904678
chr9	127888003	127888832
chr2	177355835	177356709
chr7	99663355	99663925
chr1	49344062	49344590
chr4	77905968	77906623
chr6	73571708	73572283
chr4	165125369	165125997
chr15	93346966	93347872
chr13	75344311	75344951
chr20	35572541	35573095
chr1	87253870	87254885
chr4	54931845	54932376
chr3	32010076	32010951
chr3	107241487	107242032
chr10	91091808	91092470
chr14	62036328	62036946
chr2	135159626	135160487
chr5	36502549	36503231
chr15	90944018	90944535
chr12	96631331	96631954
chr4	11132131	11132614
chr11	95245243	95246178
chr9	22342304	22343117
chr4	188400071	188400551
chr17	21065111	21065801
chr5	35129143	35129811
chr1	14813100	14813825
chr3	29566650	29567293
chr12	93293128	93293826
chr1	39967193	39967708
chr2	33294795	33295676
chr15	39156883	39157689
chr21	39661533	39662220
chr11	40350680	40351158
chr14	62020446	62021130
chr6	152418088	152418686
chr1	171110529	171111847
chr20	42567769	42568517
chr1	12524545	12525151
chr11	70998017	70998720
chr5	157811816	157812500
chr18	57260385	57260947
chr2	67890790	67891476
chr14	32978766	32979481
chr6	3825985	3826702
chr17	17838896	17839441
chr3	113549265	113549872
chr6	106535639	106536255
chr6	4358749	4359424
chr18	42117384	42117972
chr6	119862153	119862757
chr10	74490244	74490857
chr9	133656251	133656963
chr1	201562363	201563062
chr2	43766884	43767829
chr3	28417686	28418329
chr14	75038351	75039207
chr21	36935983	36936706
chr1	150585768	150586395
chr1	8121184	8121800
chr16	66070500	66071429
chr11	123108974	123109701
chr2	210360544	210361267
chr21	46468044	46468641
chr3	32955211	32956053
chr2	20996110	20996715
chr11	114034488	114035136
chr8	65669133	65669901
chr15	51401048	51401942
chr10	115095204	115095702
chr5	95194625	95195180
chr5	122758959	122759842
chr13	106803620	106804028
chr1	85763390	85764051
chr17	57863812	57864509
chr11	122057194	122057751
chr18	61455578	61456147
chr6	131227740	131228386
chr5	172881676	172882644
chr4	57824283	57824878
chr14	52836045	52836675
chr1	215716441	215716976
chr1	8456826	8457555
chr6	80838084	80838646
chr22	30601351	30602154
chr11	128366751	128367608
chr18	10519848	10520446
chr11	114165426	114166077
chr4	177715298	177715826
chr7	134617431	134617965
chr5	73938852	73939502
chr5	66544446	66545136
chr15	83956327	83956931
chr2	110369319	110369865
chr5	121304864	121305230
chr1	67600887	67601477
chr12	2272291	2273083
chr1	151945343	151945906
chr1	215196053	215197052
chr16	83847484	83848097
chr2	28550927	28551537
chr7	80351951	80352638
chr1	8107615	8108204
chr4	107504622	107505108
chr8	38264056	38264659
chr7	33782955	33783682
chr9	16964100	16964609
chr10	59463425	59463909
chrx	43871846	43872318
chr20	36738206	36738804
chr6	56803221	56803917
chr10	5075466	5076102
chrx	16856261	16856761
chrx	148544213	148544769
chr6	74290164	74290855
chr1	10487964	10488508
chr4	15402226	15403113
chr2	40330562	40331160
chr6	86173823	86174367
chr15	38421651	38422305
chr4	13893846	13894596
chr5	41871930	41872427
chr2	37995130	37996126
chr1	36851851	36852626
chr5	158128417	158129657
chr10	3542465	3543044
chr15	51379617	51380192
chr12	102250750	102251320
chr17	41047141	41047640
chr13	75900661	75901201
chr2	238116881	238117401
chr12	125249407	125250037
chr16	64474224	64474819
chr6	11609488	11610328
chr21	47469094	47469738
chr12	52674026	52674626
chr2	102666370	102667013
chr9	102827047	102827599
chr2	128266068	128266714
chr7	43687291	43688169
chr6	136043192	136043727
chr5	40991228	40991912
chr3	64276976	64277582
chr7	32060053	32060652
chr14	75709187	75709739
chr8	78221311	78221951
chr2	100279076	100279901
chr6	4352003	4352676
chr2	173860407	173861000
chr12	125003023	125003906
chr1	16125364	16126418
chr1	150583784	150584347
chr1	12696180	12697020
chr2	238131944	238132401
chr10	115251887	115252499
chr8	123011920	123012520
chr4	82527840	82528500
chr8	123613691	123614406
chr11	61738795	61739700
chr2	12460913	12461806
chr17	61433589	61434051
chr13	40810115	40810809
chr21	44056620	44057097
chr1	78744682	78745301
chr14	75130475	75131158
chr22	29107881	29108742
chr9	4774344	4774651
chr8	129912810	129913426
chr15	70766920	70767674
chr8	109437730	109438514
chr2	238036934	238037478
chr3	185374095	185374585
chr5	142382087	142382725
chr18	8341519	8342164
chr9	122713250	122714051
chr8	49502473	49503155
chr15	50147873	50148653
chr21	29814962	29815453
chr14	89892140	89892675
chr2	106071304	106072625
chr4	129492831	129493334
chr2	118979516	118980051
chr11	8740727	8741276
chr1	107520854	107521394
chr6	1200509	1201451
chr10	4283761	4284353
chr2	238188727	238189325
chr14	68674706	68675351
chr10	122856364	122856990
chr22	44529825	44530476
chr12	64311607	64312254
chr15	39420436	39420876
chrx	135137763	135138302
chr5	158202325	158202990
chr2	18158135	18159066
chr12	63096301	63097001
chr5	133774749	133775240
chr8	32729246	32729923
chr11	117091602	117092168
chr12	52888300	52888900
chr14	95485042	95485722
chr9	21657120	21657707
chr14	104515439	104515959
chr6	85895755	85896201
chr9	96220966	96221562
chr10	105032732	105033525
chr6	141520122	141520727
chr4	86953503	86954877
chr4	7829932	7830576
chr15	99048826	99049454
chr16	15684740	15685151
chr11	9809366	9810131
chr3	81793451	81794004
chr3	174157258	174157925
chr11	86459340	86459844
chr16	84865976	84866575
chr1	172255858	172256800
chr2	182931349	182931929
chr4	169555412	169556022
chr17	57915132	57915476
chr17	66778914	66779433
chr16	72231847	72232319
chr17	38706965	38708675
chr1	64127717	64128426
chr2	1656503	1657445
chr7	41956150	41956576
chr13	95923599	95924001
chr5	54056925	54057601
chr21	46378498	46379038
chr10	45476572	45477226
chr15	92469915	92470555
chr4	169804603	169805121
chr18	56720428	56721042
chr9	131311608	131312231
chr1	96827965	96828596
chr4	122649205	122649827
chr9	133722577	133723409
chr2	237551118	237551726
chr18	8835346	8836002
chr11	44768751	44769369
chr3	30327351	30327988
chr10	29947938	29948401
chr11	109117703	109118331
chr3	148897706	148898282
chr6	155337048	155337640
chr11	94527339	94528156
chr10	92689882	92691562
chr5	97764362	97764826
chr8	8163141	8163879
chr11	45110715	45111387
chr12	87641476	87642114
chr1	95205211	95205792
chr6	57107174	57107688
chr21	27268091	27268391
chr20	33895686	33896484
chr17	62675787	62676326
chr1	8271923	8272525
chr11	128077673	128078345
chr2	161725765	161726447
chr15	86166935	86167401
chr9	16986841	16987396
chr2	112419965	112420390
chr15	60663344	60664023
chr2	161244302	161244826
chr3	134045543	134046176
chr4	22669878	22670394
chr9	4302044	4302552
chr16	73053984	73054665
chr20	52828676	52829178
chr3	152314106	152314733
chr6	68339848	68340462
chr10	28491619	28492316
chr1	184591345	184591851
chr18	52409746	52410356
chr15	75959079	75959564
chrx	153305675	153306251
chr10	101501856	101502475
chr19	16844765	16845126
chr3	146031223	146032072
chr1	8176923	8177626
chr6	160137641	160138226
chr1	221508686	221509176
chr22	36025856	36026329
chr10	81914940	81915546
chr20	32497028	32497699
chr4	126289682	126290302
chr1	201735217	201735870
chr14	55568835	55569364
chr6	36337309	36337742
chr2	128326784	128327374
chr1	96881491	96882232
chr10	126028349	126029020
chr3	72541345	72541901
chr10	4705346	4705826
chr2	121297914	121298437
chr13	20993870	20994476
chr8	38895456	38896041
chr10	35742669	35743263
chr10	30093054	30093551
chr2	11970051	11970890
chr2	145274902	145275551
chr8	130293891	130294596
chr9	89347411	89348014
chr10	4103693	4104326
chr9	73095300	73095951
chr9	92171359	92171917
chr1	110416123	110416914
chr11	66103995	66104578
chr10	64003001	64003583
chr7	40847825	40848485
chr15	63220990	63221468
chr5	65956934	65957476
chr15	60694488	60695088
chr4	54948311	54948726
chr7	47691043	47691526
chr1	235132917	235133523
chr8	49340975	49341527
chr1	225887744	225888431
chr4	24780216	24780697
chr4	74974621	74975211
chr3	55194476	55195126
chr4	114366352	114366880
chr16	88365496	88366134
chr22	24684922	24685543
chr1	55894592	55895476
chr20	10575051	10575553
chr18	8945956	8946664
chr17	69177074	69177657
chr2	38753323	38753801
chr3	189490669	189491289
chr17	69408848	69409410
chr15	59631350	59631968
chr10	14456799	14457301
chrx	151152653	151153248
chr2	45404810	45405415
chr7	22898414	22898876
chr6	158439963	158440494
chr13	21607585	21608135
chr17	64271695	64272173
chr2	153451345	153451841
chr7	107612486	107612996
chr4	186696341	186696882
chr17	55970196	55970801
chr11	84612951	84613483
chr21	43517969	43518456
chr4	154598206	154598526
chr5	123036171	123037030
chr7	100770044	100770513
chr16	16090358	16090997
chr6	82639584	82640051
chr17	40561486	40562076
chr12	20618915	20619326
chr9	109460014	109460792
chr7	40364399	40364905
chr3	30552918	30553553
chr1	78805586	78806163
chr13	21288793	21289261
chr11	8754169	8754743
chr15	66124921	66125601
chr13	45480729	45481275
chr3	58036903	58037256
chr2	85969067	85970068
chr9	127728071	127728533
chr11	78589732	78590126
chr2	224590040	224590723
chr3	151976151	151976661
chr11	78512146	78512798
chr13	36474433	36475030
chr3	171591989	171592669
chr12	76653392	76653941
chr3	112372186	112372946
chr5	109624389	109624961
chr17	46588007	46588731
chr13	101961429	101962052
chr9	5627161	5627601
chr2	223617841	223618376
chr8	104356903	104357534
chr12	109226607	109227126
chr22	30591818	30593044
chr1	208338899	208339460
chr1	203527352	203527976
chr6	169446503	169447092
chr2	113998487	113999026
chr11	10003673	10004124
chr6	158640149	158640698
chr1	94791101	94791747
chr19	4457698	4458205
chr2	158012442	158013063
chr20	49951822	49952371
chr9	21688072	21688712
chr8	19148949	19149459
chr20	30654937	30655476
chr11	10060361	10060877
chr20	49982439	49983230
chr11	43942146	43942806
chr4	28289253	28289820
chr2	12246364	12246911
chr6	154731686	154732201
chr8	124890155	124890901
chr6	89745087	89746014
chr7	80571428	80571926
chr6	1477507	1478030
chr1	14108501	14108876
chr1	56539518	56540092
chr21	27879239	27879753
chr7	134377739	134378496
chr3	41309418	41310001
chr8	101964131	101964612
chr5	139493228	139493814
chr13	75770618	75771026
chr20	52259043	52260099
chr3	185570237	185570819
chr18	2857389	2858095
chr16	27248929	27249451
chr12	106589150	106589909
chr6	16947603	16948128
chr10	19927395	19927876
chr1	172320616	172321474
chr2	224330412	224330979
chr3	29457888	29458438
chr8	128352176	128352738
chr9	82414883	82415467
chr22	25371696	25372376
chr2	15309825	15310274
chr3	139020987	139021531
chr10	75666454	75667151
chr9	110512947	110513671
chr9	12923368	12924201
chr4	185574713	185575264
chr12	123610920	123611645
chr15	67390609	67391101
chr4	89533118	89533693
chr14	69149547	69150119
chr3	124771326	124771826
chr6	113966601	113967287
chr15	58839360	58840051
chr6	13508713	13509631
chr16	48109243	48109764
chr6	55334743	55335251
chr12	90127287	90127972
chr3	112348116	112348661
chr17	78002901	78003513
chr3	186557554	186558148
chr16	24681815	24682361
chr4	140164449	140165106
chrx	13505715	13506483
chr16	48160844	48161470
chr16	4151532	4152188
chr14	55443109	55443625
chr4	138556121	138556676
chr13	30699897	30700201
chr12	94207685	94208238
chr9	16985896	16986407
chr1	183132499	183133001
chr8	6517915	6518479
chr13	45148010	45148624
chr7	130606069	130606608
chr10	33562102	33562681
chr5	138060031	138060556
chr3	113502292	113502879
chr1	39564122	39564643
chr9	134552436	134553001
chr8	86847751	86848562
chr12	92472052	92472551
chr3	112323199	112323874
chr5	55705201	55705966
chr21	37152007	37152592
chr15	48164906	48165547
chr1	109913214	109913802
chr1	210435745	210436693
chr2	165463142	165463451
chr6	135148184	135148609
chr8	96805091	96805787
chr4	124981379	124982192
chr1	64626882	64627578
chr7	41066952	41067386
chr5	150472903	150473554
chr4	102112675	102113182
chr2	19340370	19341172
chr1	184590289	184590851
chr2	106103424	106104089
chr5	67342197	67342706
chr14	77384517	77385907
chr1	12538151	12538746
chr6	133823493	133824366
chr7	20073068	20073670
chr19	18128158	18128751
chr7	65746595	65747139
chr14	96643114	96643737
chr10	106089980	106090626
chr15	63400096	63400677
chr3	5094620	5095417
chr15	68901956	68902481
chr10	78343394	78343904
chr12	109548676	109549136
chr5	135393781	135394643
chr2	129342050	129342551
chr5	172885741	172886290
chr19	6273659	6274403
chr21	48019011	48019569
chr19	46010487	46011010
chr1	33793486	33794057
chr7	95237946	95238513
chr6	148822222	148822770
chr18	52624443	52625108
chr12	58923590	58924143
chr10	78141651	78142701
chr9	84108021	84108420
chr12	96821033	96821609
chr10	112095951	112096501
chr2	46294868	46295286
chr2	43540315	43540912
chr7	80928558	80929101
chr4	77908299	77909004
chr9	35511029	35511526
chr5	112293919	112294576
chr2	19849474	19850049
chr14	68858332	68858690
chr6	122253728	122254176
chr2	223958044	223958642
chr5	9479411	9479880
chr20	52390250	52390831
chr2	206525059	206525576
chr1	55909090	55909659
chr9	98901832	98902305
chr3	178564951	178565499
chr6	17907820	17908362
chr15	62895836	62896342
chr13	45293956	45294676
chr20	48210570	48211459
chr3	188186943	188187517
chr3	43775072	43775514
chr1	59220904	59221518
chr2	45168506	45169006
chr3	151022747	151023332
chr11	8714509	8715154
chr3	39188413	39188974
chr7	34135771	34136394
chr3	90064908	90065551
chr5	172192280	172192846
chr20	33893533	33894026
chr15	58495739	58496157
chr2	135019165	135019762
chr1	86094375	86094976
chr9	129948233	129949056
chr6	112162985	112163507
chr6	86169045	86169608
chr7	80351126	80351768
chr1	201682527	201683086
chr4	108817100	108817717
chr7	100765333	100765633
chr1	73101233	73101789
chr1	236074069	236074651
chr8	124852148	124852626
chr2	179621406	179622140
chr1	86077295	86077996
chr2	100264701	100265275
chr1	183203635	183204576
chr8	13214851	13215433
chr14	93006839	93007350
chr14	86762554	86762926
chr5	55322641	55323157
chr9	117507582	117508242
chr20	1914780	1915815
chr7	115995092	115995593
chr12	117096370	117096810
chr15	70778700	70779778
chr2	201542609	201543391
chr6	106049348	106049876
chr12	106517164	106517819
chr1	65979565	65980150
chr4	129438865	129439626
chr1	61914492	61915026
chr7	99551219	99551658
chr15	91223441	91224076
chr19	1177484	1178118
chr19	4066612	4067123
chrx	135212950	135213481
chr17	38677628	38678367
chr11	114179357	114179857
chr1	161972829	161973477
chr13	75335826	75336642
chr10	31323287	31323938
chr20	17543256	17543840
chr9	33946692	33947242
chr1	218669817	218670398
chr11	130642215	130642983
chr5	152930914	152931543
chr10	111834787	111835470
chr18	11178937	11179442
chr21	35899114	35899544
chr4	138584931	138585798
chr8	119808863	119809301
chr2	20001245	20001776
chr4	88926185	88926826
chr20	30301073	30301526
chr6	2504366	2504726
chr12	46956545	46957001
chr16	55504466	55505091
chr1	208376557	208377312
chr5	127552473	127553351
chr20	33894784	33895441
chr7	104591050	104591555
chr7	36155176	36155806
chr8	48425939	48426441
chr6	160321357	160321876
chr8	24062284	24062801
chr3	134182845	134183499
chr2	121954957	121955535
chr15	75912401	75913483
chr10	31364410	31364751
chr6	13761186	13761526
chr2	216545733	216546226
chr9	111774742	111775042
chr3	101659264	101659862
chr19	17067967	17068704
chr11	106269889	106270426
chr7	114648495	114649001
chr7	100760632	100761166
chr8	33210838	33211461
chr2	39757420	39757965
chr22	43329592	43330189
chr5	148345148	148345749
chr2	69404294	69404873
chr10	77879151	77879700
chr10	18446700	18448062
chr3	127500183	127500574
chr8	130648085	130648554
chr11	38482419	38482944
chr1	245934843	245935697
chr17	81150831	81151330
chr11	85800710	85801137
chr12	58960397	58960911
chr7	73265168	73265618
chr14	69406570	69407051
chr18	41472769	41473276
chr11	35601029	35601600
chr5	172199371	172199950
chr8	57451532	57452124
chr14	95131388	95131920
chr2	75822937	75823552
chr8	23396520	23396826
chr7	144228249	144228762
chr5	140904128	140904789
chr2	46309501	46310257
chr14	85937998	85938518
chr1	12655961	12656879
chr11	128352201	128353204
chr11	101982620	101983129
chr3	41722935	41723401
chr9	16335801	16336292
chr22	40357306	40357795
chr5	39494338	39494814
chr8	27805901	27806456
chr12	680557	681256
chr1	10458536	10458995
chr17	57406901	57407463
chr10	101548339	101548719
chr3	32511160	32511645
chr16	78718037	78718576
chr3	105625455	105626111
chr5	83140222	83140835
chr1	203275636	203276153
chr2	208378530	208379051
chr9	80129778	80130326
chr8	22454766	22455340
chr3	186780247	186780926
chr1	178310366	178310922
chr13	77961291	77961926
chr4	121214218	121215071
chr1	154391944	154392492
chr10	29925125	29925622
chr7	147109820	147110120
chr20	35571802	35572201
chr2	62887803	62888372
chr8	134045392	134045924
chr6	91078598	91079252
chrx	13416403	13416952
chr3	59639744	59640251
chr3	112390800	112391326
chr7	22757710	22758251
chr13	67233382	67233921
chr9	137494299	137494701
chr2	10545481	10545995
chr18	65192481	65193237
chr16	12895279	12895842
chr21	39635277	39635906
chr5	121411608	121412063
chr20	32858001	32858572
chr4	159731876	159732419
chr1	205144490	205145030
chr19	39894111	39894797
chr1	228416164	228416845
chr6	53918939	53919376
chr1	223894758	223895415
chr11	3145351	3146007
chr11	100747463	100747929
chr12	110546871	110547488
chr2	47261149	47261837
chr12	116820966	116821401
chr8	38243416	38243929
chr2	43186340	43187263
chr12	13251403	13251990
chr2	47194994	47195527
chr2	163100889	163101537
chr2	37700110	37700638
chr5	57706142	57706760
chr11	114033418	114034066
chr5	53942290	53942865
chr1	59349028	59349401
chr4	102739531	102739926
chr7	42419961	42420503
chr3	114215651	114216211
chr15	68900533	68901251
chr3	134076700	134077219
chr3	32150780	32151286
chr7	7196666	7197276
chr12	127073339	127073842
chr7	105229794	105230270
chr7	36684303	36685134
chr2	205707295	205707825
chr3	66083848	66084449
chr3	177553763	177554241
chr11	18405050	18405751
chr18	3013327	3013798
chr9	123346289	123346775
chr4	114370681	114371176
chr3	30512474	30513039
chr9	27154848	27155353
chr2	191070391	191070876
chr2	235588563	235589128
chr9	89410757	89411251
chr14	59338801	59339316
chr6	53493464	53493956
chr15	39186371	39187101
chr6	90995154	90995781
chr2	42193427	42194056
chr2	218868623	218869162
chr8	121797947	121798413
chr6	122203069	122203990
chr1	24616338	24616847
chr17	67963976	67964702
chr1	62071970	62072751
chr9	89677901	89678573
chr10	82258607	82259145
chr2	106026096	106026660
chr2	222807776	222808279
chr2	161693179	161693693
chr7	73686812	73687430
chr18	11954199	11954792
chrx	14033315	14033817
chrx	9346822	9347290
chrx	148535902	148536399
chr11	7600610	7601056
chr11	111194831	111195460
chr17	14641444	14642051
chr11	46670762	46671247
chr7	4707717	4708327
chr13	24275530	24276151
chr8	23997202	23997976
chr2	238006514	238007144
chr4	41144871	41145576
chr3	124531445	124532001
chr7	18906109	18906702
chr11	113545775	113546276
chr6	45709435	45710006
chr3	66038593	66039082
chr17	53532182	53532688
chr12	63124335	63124912
chr5	159509991	159510501
chr21	30714861	30715372
chr9	71693418	71693855
chr18	74171679	74172332
chr17	48716376	48717152
chr15	63226450	63226949
chr4	52797413	52798015
chr16	24680696	24681189
chr12	123272872	123273391
chr10	111746947	111747554
chr10	75807513	75807999
chr1	160101798	160102297
chr15	99421258	99421751
chr7	104836788	104837276
chr4	99981249	99981613
chr13	28903867	28904276
chr11	10408845	10409301
chr9	78725013	78725437
chr18	3155462	3156083
chr3	105084834	105085442
chr16	73023629	73024415
chr15	91103383	91103961
chr9	117612851	117613531
chr4	67430887	67431302
chr3	71221971	71222476
chr18	6731193	6731685
chr11	66703697	66704175
chr11	48084914	48085587
chr1	218879326	218879876
chr12	96199641	96200187
chr15	58805865	58806406
chr1	78298435	78299105
chr5	176972421	176972990
chr14	53477656	53478178
chr16	66284544	66285384
chr13	110896435	110896840
chr8	17435576	17435951
chr12	58704535	58705187
chr17	15862367	15862801
chr8	101494402	101494916
chr20	17824001	17824589
chr20	42212480	42212944
chr1	212091101	212091552
chr3	106926940	106927452
chr7	123366996	123367598
chr6	164211252	164211703
chr9	98556435	98556989
chr4	186950772	186951551
chr7	121184717	121185204
chr6	3389976	3390449
chr12	66273557	66274096
chr12	57530121	57530795
chr20	48200108	48200718
chr22	20907260	20907694
chr12	13288550	13289177
chr6	22821979	22822551
chr2	109788129	109788610
chr11	88053179	88053697
chr5	39760788	39761330
chr4	129405960	129406420
chr2	12596431	12596915
chr9	114774328	114774973
chr18	2516131	2516649
chr4	138882070	138882677
chr3	72395723	72396183
chr14	68407501	68408251
chr2	42345226	42345759
chr12	124242062	124242544
chr1	21348708	21349197
chr3	29805511	29805971
chr16	70725730	70726209
chr6	30749448	30750076
chr18	77163315	77163855
chr3	148299523	148300470
chr17	71287820	71288704
chr22	39704612	39705191
chr19	4130912	4131431
chr19	11275474	11275963
chr20	48782038	48782901
chr19	8426732	8427383
chr16	4001839	4002332
chr21	46461043	46461630
chr7	100768025	100768437
chr14	35119971	35120458
chr19	11279111	11279609
chr2	106134231	106134730
chr6	168256409	168256851
chr2	205317252	205317751
chr5	162936423	162936925
chr18	43097133	43097784
chr17	60936427	60937197
chr3	106064123	106064902
chr4	157397499	157397898
chr18	3367644	3368201
chr2	218723163	218723645
chr6	57178453	57178976
chr4	121364132	121364801
chr11	129013085	129013669
chr12	63097101	63097806
chr13	40976931	40977401
chr15	81481917	81482541
chr9	82676909	82677301
chr18	33058544	33058901
chr12	12551173	12551716
chr6	39521428	39521985
chr15	62761979	62762473
chr12	76099856	76100201
chr1	234669618	234670247
chr12	2448153	2448654
chr7	110838186	110838714
chr1	93794270	93794789
chr7	40867001	40867632
chr10	43624803	43625201
chr11	128080220	128080851
chr18	57590343	57590921
chr10	114344823	114345251
chr3	23410110	23410639
chr16	73019090	73019738
chr2	127913383	127913890
chr5	81709335	81709915
chr9	13705900	13706452
chr8	80269386	80269926
chr13	97777344	97778160
chr16	48110340	48110820
chr12	94288136	94288851
chr14	45431069	45431501
chr6	85125952	85126376
chr7	15790745	15791356
chr12	113683901	113684426
chr2	86151587	86151977
chr13	113394834	113395333
chr12	124155313	124155728
chr22	28538284	28538856
chr2	238000594	238001051
chr3	41013001	41013485
chr5	17302711	17303051
chr11	72957245	72957766
chr5	16886430	16886783
chr3	30700488	30701351
chr6	39850330	39850826
chr12	123574249	123574826
chr12	123612347	123612836
chr8	76030501	76030986
chr15	73082460	73082958
chr1	56055416	56056101
chr10	63843103	63843781
chr2	120013285	120013931
chr18	56673772	56674316
chr16	15670234	15670534
chr11	86230032	86230551
chr22	44756679	44757351
chr8	38720082	38720656
chr11	128110367	128110880
chr2	28887849	28888605
chr11	71010398	71010851
chr1	100817586	100818050
chr7	33907679	33908203
chr5	66564349	66564751
chr5	110245577	110246093
chr10	4583398	4583958
chr8	133963685	133964026
chr17	41434246	41434813
chr2	45139722	45140376
chr3	187672589	187673451
chr16	19147828	19148826
chr12	2373975	2374876
chr18	65092814	65093326
chr2	158030118	158030652
chr17	61689411	61689975
chr15	88162234	88162867
chr1	65376366	65376742
chr12	6324896	6325597
chr7	96578518	96579482
chr5	71748019	71748910
chr19	57018749	57019200
chr10	28012307	28012827
chr2	174049086	174049543
chr3	123372150	123372901
chr3	111521818	111522561
chr17	34105232	34105573
chr12	13299438	13299951
chr22	27566330	27567044
chr14	75086401	75086876
chr5	53598053	53598511
chr9	71746519	71747162
chr11	61771912	61772292
chr12	14480537	14481125
chr12	123930385	123930861
chr10	119368726	119369293
chr5	176973166	176973745
chr4	17068642	17069046
chr12	741556	741974
chr6	138914376	138914910
chr12	19924737	19925229
chr3	48507025	48507326
chr10	4574582	4575047
chr1	210771494	210772094
chr14	86154269	86154790
chr3	12185474	12186109
chr10	78095904	78096554
chr13	23923198	23923750
chr2	227525262	227525693
chr9	132672802	132673300
chr9	22084601	22085126
chr8	70556046	70556401
chr10	64342453	64343106
chr5	32760151	32760625
chr6	132301089	132301715
chr8	102979898	102980301
chr15	72631134	72631665
chr16	53805605	53806301
chr9	97695640	97696183
chr1	182991463	182991993
chr7	104992416	104992908
chr2	99895328	99895651
chr14	25435203	25435741
chr15	35982899	35983634
chr10	104512819	104513576
chr11	128452677	128453255
chr21	38432467	38432979
chr8	70536476	70536976
chr7	119692908	119693379
chr1	78004481	78005807
chr9	137032695	137033115
chr11	94809521	94810098
chr3	142033812	142034260
chr5	43432666	43433101
chr5	106761273	106761776
chr12	116757812	116758176
chr1	19762424	19762942
chr14	68925651	68926276
chr8	118990324	118990888
chr12	108761038	108761657
chr6	139919086	139919684
chr1	86088658	86089288
chr3	147016395	147016878
chr8	95113362	95113926
chr6	111885632	111886240
chr7	7602284	7602718
chr5	168587924	168588493
chr7	93977449	93977927
chr15	25637255	25637676
chr5	76428795	76429276
chr1	8087458	8088060
chr1	66736831	66737433
chr11	123300583	123301006
chr10	71951501	71952103
chr15	70722506	70722806
chr20	48384723	48385130
chr14	50449212	50449693
chr17	64463030	64463560
chr22	27610141	27610738
chr2	21261576	21262238
chr6	15901136	15901655
chr21	43050347	43051002
chr20	39877172	39877726
chr16	88338110	88338476
chr2	102459524	102459901
chr3	8502956	8503256
chr5	121429294	121429933
chr17	27972434	27973026
chr16	54407668	54408211
chr6	2502385	2503069
chr9	89885285	89885829
chr21	44144262	44144811
chr14	89909554	89910076
chr2	46542374	46542955
chr11	47026093	47026631
chr18	32862279	32862776
chr21	34191953	34192376
chr1	183248999	183249351
chr16	57925897	57926496
chr2	70016214	70016801
chr2	12674733	12675462
chr3	189721342	189721911
chr10	78435526	78436199
chr6	72188521	72189076
chr3	157029294	157029821
chr1	183994380	183994882
chr18	43102420	43102875
chr4	159042339	159042790
chr11	102096551	102097069
chr5	83899685	83900176
chr9	97662905	97663410
chr2	161232432	161233063
chr3	32521979	32522530
chr3	134050151	134050701
chr16	12156364	12156952
chr11	27255555	27256183
chr6	149353767	149354561
chr6	141647545	141648040
chr3	73776266	73776826
chr4	184509541	184509851
chr1	185453242	185453626
chr3	10018635	10019073
chr11	57794734	57795165
chr13	40171983	40172401
chr8	6483713	6484175
chr7	115957198	115957732
chr12	48275500	48276015
chr2	1733839	1734662
chr17	4230947	4231383
chr5	167060815	167061576
chr1	198626667	198627212
chr21	36260674	36261251
chr4	107416683	107417076
chr3	99620147	99620599
chr8	38858602	38859104
chr20	39636992	39637351
chr11	64622300	64622851
chr11	2799848	2800314
chr19	56643825	56644125
chr9	86986677	86987066
chr19	18570521	18570931
chr9	136009029	136009431
chr9	127594938	127595437
chr14	104043004	104043351
chr3	112359832	112360376
chr1	22091269	22091909
chr10	14105895	14106465
chr3	127487456	127487776
chr16	70611079	70611631
chr20	10584724	10585701
chr11	44863701	44864200
chr1	16521785	16522374
chr10	24754180	24754783
chr12	112560771	112561071
chr2	145756701	145757201
chr3	99224703	99225174
chr2	238050046	238050726
chr15	99439945	99440516
chr15	48987154	48987765
chr9	89605117	89605633
chr10	60616100	60616620
chr2	98486688	98487359
chr2	216749301	216749799
chr20	50648364	50648949
chr5	142533040	142533651
chr1	226022026	226022598
chr9	18238201	18238726
chr3	12392534	12393026
chr11	36477152	36477750
chr17	4107886	4108351
chr6	3390823	3391351
chr18	59785462	59785960
chr2	43191519	43192102
chr2	237478151	237478559
chr8	97111308	97111840
chr8	19266126	19266851
chr6	17945245	17945711
chr15	70784921	70785457
chr2	100221605	100222001
chr13	113841429	113842029
chr2	197070469	197071008
chr4	15416184	15416794
chr3	16376300	16376814
chr12	56241599	56242051
chr5	158419329	158419851
chr10	60542714	60543176
chr2	106021828	106022176
chr1	151964770	151965455
chr6	136172402	136172910
chr11	63435494	63435965
chr15	58732416	58732726
chr8	97350192	97350800
chr10	3511102	3511709
chr21	30502460	30502933
chr15	71119007	71119411
chr8	27271068	27271799
chr1	218550535	218551033
chr9	33328965	33329560
chr15	67341780	67342747
chr6	23004075	23004721
chr3	131854775	131855262
chr3	61585865	61586248
chr7	55245275	55245889
chr6	158136688	158137127
chr18	68089356	68089952
chr7	90208375	90208851
chr6	25012824	25013326
chr17	39113185	39113495
chr2	180201853	180202363
chr3	99228150	99228593
chr15	40384407	40384881
chr7	73670886	73671253
chr2	150850975	150851351
chr11	19940594	19941175
chr5	67323260	67323784
chr9	87839313	87839801
chr1	170879599	170880118
chr12	116819629	116820258
chr2	47284373	47284901
chr1	24620838	24621224
chr6	16339099	16339598
chr1	217448532	217449049
chr1	53135280	53135745
chr21	37432412	37432852
chr8	123608048	123608504
chr5	93778609	93779101
chr9	95268441	95269037
chr1	59527427	59527876
chr1	204263551	204263932
chr19	2634531	2634926
chr7	46803655	46804202
chr2	43062815	43063609
chr3	189578214	189578680
chr1	8577427	8578022
chr5	121518942	121519476
chr9	116383688	116384140
chr5	10551460	10551872
chr2	121227973	121228525
chr10	33798117	33798521
chr13	36553457	36554081
chr5	142623479	142624201
chr11	94666401	94666910
chr6	21033763	21034326
chr1	171096596	171097101
chr11	19395701	19396212
chr2	46165857	46166426
chr10	105408744	105409458
chr15	40074774	40075234
chr9	137516670	137517158
chr12	104571475	104572179
chr3	21747190	21747751
chr2	96852956	96853485
chr1	8537560	8538012
chr6	75342015	75342517
chr6	116760094	116760501
chr20	45955449	45955861
chr1	21879100	21879528
chr17	43164911	43165263
chrx	68580976	68581564
chr17	76875638	76876001
chrx	152647254	152647669
chr18	74452307	74452737
chr9	137299036	137299505
chr16	28503148	28503666
chr10	30184480	30184780
chr4	52830131	52830656
chr10	93109027	93109556
chr3	29426005	29426711
chr12	77277540	77278107
chr19	30178326	30178810
chr13	23952080	23952652
chr19	42972390	42972840
chr11	9786945	9787551
chr9	82301526	82302319
chr21	22737172	22737601
chr3	156333679	156334139
chr5	146796565	146797368
chr7	47644457	47644992
chr2	242101315	242101826
chr14	61029826	61030304
chr3	179898507	179899003
chr2	43691643	43692106
chr17	66379859	66380370
chr2	42369245	42369901
chr1	206674725	206675256
chr14	99423431	99423929
chr14	51771746	51772046
chr18	41443076	41443601
chr9	103190111	103190551
chr21	22537608	22537976
chr1	172328011	172328682
chr7	94843237	94843728
chr5	158181050	158181376
chr13	28130284	28130760
chr1	98366503	98366954
chr4	122611902	122612351
chr10	124254715	124255561
chr4	7971225	7971727
chr6	32054422	32054828
chr20	31718296	31718778
chr5	155547970	155548583
chr21	30631300	30631798
chr12	64575329	64575826
chr17	10017824	10018825
chr14	76114619	76115114
chr2	205333696	205334126
chr9	89997966	89998301
chr2	190215228	190215709
chr16	67089529	67089973
chr7	127876888	127877438
chr9	116382713	116383221
chr1	61547939	61548379
chr11	6240426	6240926
chr10	117797748	117798192
chr11	91715228	91715528
chr6	90928101	90928526
chr5	172222176	172222861
chr1	8963997	8964326
chr6	151389077	151389755
chr9	130345927	130346246
chr1	95249007	95249547
chr17	66374563	66375251
chr11	86454541	86455154
chr14	89882027	89882572
chr18	53500579	53501208
chr20	13258517	13258972
chr10	33411048	33411501
chr6	17932607	17933124
chr10	63855248	63855832
chr1	183149818	183150304
chr8	118893774	118894201
chr4	115193304	115193852
chr10	63592658	63592958
chr4	114318310	114318705
chr2	204546695	204547026
chr6	31648444	31648865
chr20	52961721	52962156
chr17	39216452	39216965
chr8	49565588	49565976
chr3	45037012	45037312
chr7	18733180	18733810
chr2	206185920	206186381
chr6	106043990	106044576
chr15	45934394	45934948
chr2	43150141	43150660
chr13	52219374	52219885
chr3	177552770	177553250
chr5	157453499	157453970
chr6	106245818	106246321
chr9	33029357	33029657
chr3	177243897	177244401
chr9	82104185	82104624
chr2	121289793	121290215
chr21	28962551	28963029
chr18	71918821	71919334
chr6	135230157	135230727
chr7	54971767	54972228
chr9	99257621	99258021
chr4	57723923	57724530
chr13	93459586	93460143
chr5	68745990	68746321
chr1	234752983	234753427
chr1	64434391	64434930
chr2	9427814	9428298
chr6	112005005	112005479
chr6	122013144	122013677
chr2	113450151	113450575
chr14	75446085	75446640
chr1	14467266	14467684
chr10	71232324	71232726
chr4	138562691	138563148
chr9	91360211	91360804
chr8	116113190	116113551
chr9	117614526	117614826
chr6	42489712	42490224
chr2	146509693	146510251
chr9	107620573	107621071
chr15	34516955	34517348
chr6	45593999	45594326
chr3	170458865	170459301
chr4	186659038	186659701
chr15	59605847	59606335
chr12	24215792	24216126
chr5	65956198	65956615
chr1	78300595	78301076
chr3	57014918	57015229
chr5	135343082	135343426
chr7	139432046	139432365
chr8	38794100	38795159
chr15	101667951	101668426
chrx	11488279	11488776
chr9	80322637	80322978
chr2	168994810	168995354
chr6	154708550	154708874
chr5	133802008	133802476
chr16	70784960	70785376
chr17	618014	618423
chr20	17891424	17891933
chr3	160867261	160867666
chrx	46699654	46700067
chr15	89595124	89596000
chrx	10737992	10738326
chrx	9430930	9431404
chr19	3572347	3572732
chr19	56060804	56061241
chr14	55979346	55979746
chr1	55400462	55400881
chr19	11545801	11546161
chrx	38093203	38093908
chr16	55070012	55070351
chr10	4325951	4326615
chr17	6655774	6656476
chr3	40096242	40096751
chr2	190150866	190151354
chr1	170278721	170279076
chr14	87105559	87105944
chr1	16212085	16212528
chr8	123208125	123208741
chr9	89409647	89410118
chr8	134587933	134588351
chr18	59400636	59401076
chr5	35924144	35924616
chr5	138180653	138181194
chr10	14116402	14116801
chr17	10543782	10544181
chr10	112170053	112170546
chr2	23472238	23472690
chr1	7351429	7352234
chr6	25172956	25173454
chr5	176884562	176885041
chr1	18201053	18201731
chr20	9389844	9390367
chr5	118713975	118714473
chr16	17499109	17499699
chr6	118709446	118709951
chr4	55147667	55148026
chr17	47592549	47593151
chr2	38405848	38406276
chr10	75725877	75726251
chr16	84178634	84179079
chr1	8264344	8265210
chr3	39952921	39953301
chr1	240163970	240164380
chr2	8821398	8821701
chr3	177169680	177170207
chr17	54218445	54219232
chr12	104917237	104917741
chr2	179163499	179163932
chr8	67036060	67036544
chr4	71553886	71554288
chr4	187507359	187507835
chr6	37772339	37772753
chr2	100482301	100482816
chr5	111296140	111296662
chr1	183911930	183912501
chr17	67497489	67497951
chr17	67729753	67730201
chr10	31146841	31147198
chr8	37548904	37549208
chr9	95172610	95173160
chr9	110412432	110412993
chr10	100074272	100074835
chr17	59329472	59329961
chr4	145831710	145832189
chr1	41574980	41575415
chr4	77535721	77536226
chr1	109968982	109969415
chr3	157017898	157018416
chr2	118818819	118819339
chr8	13104543	13104976
chr3	64277716	64278051
chr15	58762000	58762476
chr14	62078728	62079287
chr9	22211628	22212184
chr7	42519366	42520226
chr2	36665891	36666240
chr17	19351952	19352455
chr5	106900464	106901078
chr16	53802353	53802905
chr1	8940101	8940659
chr2	40895493	40896083
chr3	12234836	12235349
chr1	151967449	151967906
chr4	74757726	74758215
chr1	183239865	183240251
chr1	12193094	12193443
chr7	7541728	7542131
chr1	22257675	22258149
chr4	154925858	154926393
chr4	26016772	26017317
chr7	36342861	36343359
chr3	171847516	171848311
chr20	46644666	46645158
chr11	33712260	33712601
chr10	74094626	74095528
chr7	112635101	112635882
chr1	40400046	40400401
chr5	55193722	55194121
chr5	76086478	76086992
chr12	89728554	89728901
chr3	11507744	11508103
chr1	12203863	12204201
chr1	63248109	63248589
chr2	109934588	109935551
chr1	159749312	159749676
chr6	160122530	160123041
chr3	11187635	11188043
chr1	33618852	33619260
chr22	19280316	19280764
chr1	202558457	202558776
chr6	54511271	54511779
chr2	197852562	197853029
chr12	120694845	120695366
chr10	53149504	53150141
chr9	123883941	123884453
chr7	22600884	22601336
chr1	59616737	59617076
chr2	29886212	29886651
chr3	190251333	190251866
chr9	112507851	112508526
chr12	65930704	65931076
chr3	23083697	23084173
chr2	56089586	56090226
chr4	95333809	95334276
chr9	78166736	78167173
chr8	117058973	117059451
chr13	101959700	101960026
chr11	34302762	34303204
chr3	74581551	74582030
chr2	187286951	187287404
chr10	99408701	99409056
chr10	102650334	102650796
chr9	112878715	112879167
chr3	171792449	171792777
chr6	70403795	70404151
chr4	129985817	129986269
chr6	106047632	106048062
chr4	53885957	53886479
chr14	77843555	77843954
chr7	29645858	29646325
chr4	188052918	188053311
chr19	39141792	39142201
chr2	237570615	237571174
chr5	111333151	111333798
chr1	235147438	235147851
chr1	210612376	210612894
chr7	90711395	90711701
chr11	3926655	3926976
chr12	108699918	108700349
chr9	33330047	33330445
chr9	33320326	33320914
chr3	104078276	104078694
chr2	139122183	139122627
chr12	113660908	113661208
chr7	19802346	19802726
chr1	101703002	101703484
chr17	66573011	66573486
chr4	177805069	177805451
chr22	30238815	30239134
chr11	10512301	10512901
chr10	91241308	91241711
chr9	78066124	78066673
chr11	19400396	19400784
chr8	38266232	38266749
chr3	72987786	72988086
chr7	47835176	47835606
chrx	21950633	21951101
chr19	14621371	14621763
chr8	37901336	37901851
chr2	232504944	232505381
chr8	103819751	103820997
chr11	61772783	61773235
chr17	80970739	80971121
chr11	31849076	31849501
chr9	96901950	96902559
chr12	116864108	116864544
chr3	57996983	57997364
chr19	45245095	45245418
chr10	31025691	31026146
chr1	9858383	9858822
chr19	18527505	18527859
chr14	62049095	62049551
chr3	15839346	15839859
chr3	188358801	188359201
chr3	32463418	32463838
chr2	9319175	9319676
chr6	32097989	32098398
chr7	112124796	112125227
chr2	196396481	196396927
chr1	85796050	85796626
chr2	74428709	74429118
chr18	42834676	42835191
chr6	48003925	48004441
chr8	80267877	80268329
chr2	238130748	238131332
chr15	50347248	50347877
chr10	15527839	15528813
chr12	89556351	89556851
chr15	71587646	71588251
chr8	25771861	25772262
chr20	49596645	49597131
chr9	137036937	137037500
chr1	26021414	26021997
chr9	112903701	112904126
chr3	106147413	106147847
chr15	39317444	39317926
chr4	177159362	177159830
chrx	109325260	109325738
chrx	128882243	128882673
chr10	92401894	92402302
chr7	34172919	34173340
chr2	240143825	240144327
chr2	188391964	188392363
chrx	39580814	39581261
chr5	55374661	55375140
chr15	85455529	85455926
chr9	137348055	137348593
chr17	25553671	25554072
chr12	122884627	122885376
chr6	73058624	73059037
chr14	51207591	51207891
chr4	10108106	10108593
chr6	115934671	115935126
chr12	57527538	57527953
chr3	29376713	29377209
chr21	39713476	39714030
chr3	123407195	123407674
chr6	166970273	166970783
chr12	105096491	105096826
chr1	85163794	85164351
chr8	27797339	27797815
chr3	71586429	71586801
chr16	66300308	66300754
chr2	12609222	12609715
chr11	26868915	26869401
chr9	16642597	16643021
chr3	31238206	31238735
chr8	69833193	69833693
chr4	159917806	159918218
chr2	101741337	101741959
chr22	41940503	41940934
chr3	134053351	134053723
chr6	52459846	52460326
chr3	11641852	11642446
chr10	111658389	111658919
chr15	61519435	61519966
chr2	198069699	198070125
chr12	115356625	115357123
chr11	121466459	121466957
chr8	133966566	133967064
chr8	109045865	109046363
chr3	101900351	101900715
chr1	183811513	183812011
chr4	111208238	111208686
chr10	44289182	44289581
chr6	37102347	37102756
chr5	61708218	61708593
chr15	58506201	58506613
chr16	66907075	66907555
chr20	10742294	10742702
chr6	52898511	52898955
chr22	26155719	26156215
chr11	62320857	62321261
chr3	128210775	128211076
chr3	188311865	188312346
chr2	30594811	30595137
chr9	111798328	111798740
chr17	8382857	8383355
chr8	128222826	128223326
chr1	184836265	184836626
chr1	110363868	110364201
chr15	39006722	39007435
chr12	109900196	109900644
chr1	204265605	204266030
chr5	81714079	81714478
chr11	34287966	34288369
chr4	148140284	148140765
chr7	111839075	111839501
chr12	78241870	78242326
chr17	30023131	30023653
chr12	6445437	6445951
chr3	23727387	23727701
chr10	64548667	64549102
chr5	15452844	15453262
chr16	78539438	78540261
chr4	95498336	95498636
chr3	36435695	36436001
chr2	177594526	177595005
chr17	38488050	38488826
chr1	95155466	95155932
chr10	73620142	73620633
chr2	198060476	198060776
chr1	112275951	112276389
chr17	66576382	66576751
chr2	43496877	43497419
chr1	201430209	201430611
chr2	208028032	208028632
chr5	88753651	88754176
chr15	71160312	71160711
chr5	175834590	175835016
chr15	38422976	38423447
chr20	48929302	48929876
chr12	28018376	28018776
chr9	91467738	91468063
chr4	124706603	124707084
chr18	6741203	6741701
chr10	74856599	74857027
chr12	13500258	13500688
chr9	113337335	113337861
chr1	70380928	70381358
chr2	102080651	102081154
chr2	201117330	201117806
chr4	7807189	7807643
chr1	157980467	157980876
chr13	21653682	21654386
chr11	122078565	122079381
chr18	2515248	2515764
chr2	62241178	62241651
chr4	108540201	108540647
chr8	123179041	123179579
chr2	125925340	125925706
chr1	151864673	151864985
chr2	47039730	47040051
chr2	161777309	161777626
chr11	114037505	114037926
chr14	100497793	100498676
[truncated: 284 more rows]
