# Supplementary material for: PLZF targets developmental enhancers for activation during osteogenic differentiation of human mesenchymal stem cells
Source: eLife. 2019 Jan 23;8:e40364. doi: 10.7554/eLife.40364 (PMC6344081; doi:10.7554/eLife.40364)
Supplement: Supplementary file 5. [file elife-40364-supp5.xlsx]

## Sheet: PLZF peaks (H3K27Ac gain)
PLZF Peak position						Mapped nearest transcript						Expression from RNA seq						Histone mark by ChIP-seq
												Expression during Osteogenic commitment			Expression changes after PLZF knock down
Chromosome	Start	End	PLZF_d0_Signal	PLZF_d10_Signal	log2(PLZF_d10/d0) signal ratio	BorderDist:From Peak_PLZF_d10 SAG coloc to combined-alldata-alltranscript	CenterDist:From Peak_PLZF_d10 SAG coloc to combined-alldata-alltranscript	Direction to nearest combined-alldata-alltranscript-region	Rel. position of nearest transcript	Symbol	Transcript length from combined-alldata-alltranscript	log2FC(10ddiff/Undif)	Regulation(10ddiffVsUndif)	adj. p-value(28ddiffVsUndif)	log2FC(PLZFkd2ddiff/Undiff)	Regulation(PLZFkd2ddiffVsUndiff)	adj. p-value(PLZFkd10ddiffVsUndiff)	K27Ac_d0 (naive)	K27Ac_d10	log2(K27Ac_d10/d0)
chr10	4574582	4575047	0.541476	1.23262	1.18676	106210	106443	-	-106443	ENSG00000230096	691	0	no	NA	0	no	NA	2.36338	4.72816	1.00043
chr5	17302711	17303051	0.159258	1.56332	3.29518	3439	3609	+	3609	ENSG00000185296	580	0	no	0.139	0	no	1	0.907158	1.81612	1.00143
chr5	32027875	32028641	0.191109	2.85607	3.90156	18846	19229	-	-19229	PDZD2	10271	1.37	up	4.36e-06	1.1	up	0.0182	1.31299	2.63024	1.00234
chr8	6483713	6484175	0.318515	1.35287	2.08659	330	561	+	561	AK095865	2439	1.27	up	0.494	1.18	up	0.141	2.12466	4.25848	1.00311
chr1	21879100	21879528	0.0955546	0.811724	3.08659	941	1155	+	1155	ALPL	2442	5.34	up	0	0.59	up	1.98e-143	0.811667	1.62824	1.00435
chr4	154925858	154926393	0.477773	1.26268	1.40209	184972	185239	-	-185239	AK021877	2085	0	no	NA	0	no	NA	2.38726	4.79079	1.00491
chr11	47026093	47026631	0.254812	1.17249	2.20207	16669	16938	-	-16938	C11orf49	770	-0.42	down	7.7e-07	-0.17	down	0.811	1.16976	2.34843	1.00549
chr18	6731193	6731685	0.254812	1.38294	2.44023	1332	1578	-	-1578	LOC100508177/LOC100510425	491	-1.44	down	1	-10000	down	1	0.763922	1.5343	1.00609
chr8	37548904	37549208	0.222961	1.05223	2.23859	4061	4213	+	4213	ZNF703	3347	-0.75	down	0	-0.64	down	1.06e-28	0.668432	1.34643	1.01029
chr13	80324257	80324758	0.41407	1.44306	1.80119	53794	54045	+	54045	ENSG00000229011	428	0	no	NA	0	no	NA	0.93103	1.87874	1.01287
chr1	208338899	208339460	0.41407	1.56332	1.91667	23078	23359	-	-23359	PLXNA2	4728	3.01	up	2.5e-166	2.35	up	0	2.36338	4.79079	1.01941
chr10	74094626	74095528	0.605179	1.53326	1.34116	-213	238	+	238	DNAJB12	717	-0.22	down	0.652	-0.29	down	0.257	3.36603	6.82609	1.02001
chr18	42904304	42905091	0.318515	2.76587	3.1183	111344	111738	-	-111738	SLC14A2	3540	3.31	up	0.526	0.4	up	0.267	2.91245	5.91803	1.02288
chr11	10060361	10060877	0.222961	1.50319	2.75317	3660	3918	+	3918	SBF2	999	-0.14	down	0.000325	-0.04	down	0.479	0.692304	1.40906	1.02525
chr1	41574980	41575415	0.254812	1.47313	2.53138	10180	10398	-	-10398	ENSG00000215893	493	0	no	NA	-10000	down	0.594	1.93368	3.94536	1.02881
chr3	146031223	146032072	0.159258	1.80383	3.50163	28710	29135	+	29135	ENSG00000243596	433	0	no	NA	0	no	NA	2.36338	4.8221	1.02881
chr10	101548339	101548719	0.382219	1.47313	1.94641	17	207	-	-207	ENSG00000227351	846	0	no	NA	0	no	NA	1.45623	2.97467	1.0305
chr1	21348708	21349197	0.254812	1.14243	2.16459	18280	18525	-	-18525	ENSG00000233072	385	0	no	NA	0	no	NA	1.40848	2.88074	1.0323
chr18	10519848	10520446	0.127406	1.80383	3.82356	5427	5726	+	5726	NAPG	3715	0.63	up	7.07e-11	0.35	up	5.35e-07	0.596814	1.22118	1.03292
chr3	178564951	178565499	0.668883	1.413	1.07894	2734	3008	-	-3008	KCNMB2	2552	-2.31	down	0.62	-0.45	down	0.42	1.69495	3.47567	1.03605
chr3	177553763	177554241	0.254812	1.47313	2.53138	8192	8431	-	-8431	ENSG00000231574	581	-0.42	down	1	10000	up	0.273	3.17505	6.51297	1.03654
chr1	226022026	226022598	0.318515	1.02217	1.6822	2162	2448	-	-2448	EPHX1	455	0.56	up	1.14e-71	0.46	up	0.701	0.883285	1.81612	1.03991
chr6	116760094	116760501	0.254812	1.71364	2.74956	350	553	+	553	DSE	5283	0.25	up	6.71e-246	0.3	up	0.902	1.38461	2.84942	1.04119
chr1	95249007	95249547	0.318515	1.44306	2.1797	12888	13158	-	-13158	SLC44A3	2870	0.11	up	0.71	0.04	up	0.656	1.67108	3.44436	1.04345
chr17	49092447	49092788	0.318515	0.931979	1.54893	828	999	+	999	SPAG9	616	-0.13	down	1.15e-50	0.15	up	0.779	1.45623	3.00598	1.0456
chr17	66778914	66779433	0.509625	1.29275	1.34293	83996	84256	+	84256	ABCA8	5721	1.08	up	2.76e-20	1.15	up	6.45e-34	1.07427	2.22318	1.04927
chr5	65956198	65956615	0.382219	1.32281	1.79114	1544	1753	+	1753	ENSG00000249057	658	0	no	NA	0	no	NA	0.453579	0.93937	1.05034
chr6	136172402	136172910	0.509625	1.50319	1.56052	-107	147	+	147	PDE7B	1958	0.07	up	5.53e-09	0.5	up	0.0725	1.71882	3.56961	1.05434
chr20	48384723	48385130	0.477773	1.14243	1.2577	6592	6795	+	6795	SLC9A8	6557	-0.33	down	0.466	-0.09	down	3.8e-06	1.83819	3.82011	1.05533
chr5	76428795	76429276	0.41407	1.35287	1.70808	1764	2004	-	-2004	LOC728723	702	0.88	up	1	-1.07	down	1	0.692304	1.44037	1.05696
chr17	66379859	66380370	0.509625	1.68358	1.72402	15928	16183	+	16183	ARSG	979	-0.22	down	6.31e-08	-0.33	down	0.88	2.76922	5.76147	1.05696
chr11	112037268	112037647	0.318515	0.962043	1.59474	400	589	+	589	SDHD	435	10000	up	0.00246	-2.11	down	1	2.72147	5.66753	1.05833
chr12	123574249	123574826	0.286664	1.35287	2.23859	2220	2509	+	2509	AK023831	5245	10000	up	0.539	10000	up	1	1.33686	2.7868	1.05976
chr17	67963976	67964702	0.222961	1.71364	2.9422	6073	6436	-	-6436	ENSG00000237560	665	10000	up	NA	0	no	NA	0.93103	1.94137	1.06017
chr7	29645858	29646325	0.477773	1.413	1.56436	7448	7681	-	-7681	LOC646762/LOC100271874	590	0.58	up	5.77e-08	-0.07	down	0.125	2.33951	4.88473	1.06207
chr21	46382319	46382751	0.637031	1.23262	0.95229	4158	4374	-	-4374	C21orf70	759	1.13	up	0.061	0.54	up	2.08e-07	2.05304	4.28979	1.06315
chr3	155108976	155109788	0.700734	2.79594	1.99639	9330	9736	+	9736	ENSG00000243518	843	0	no	NA	0	no	NA	1.40848	2.94336	1.06332
chr22	30238815	30239134	0.445922	1.29275	1.53558	4544	4703	-	-4703	ASCC2	568	-0.04	down	2.14e-06	0.22	up	0.287	0.883285	1.84743	1.06457
chr1	78298435	78299105	0.222961	1.89402	3.08659	13688	14023	+	14023	ENSG00000235613	1695	0.08	up	0.000149	0.28	up	0.537	2.76922	5.79278	1.06478
chr4	77055114	77055685	0.382219	1.7437	2.18968	-222	64	+	64	NUP54	537	0.09	up	0.0192	-0.09	down	0.538	0.119363	0.250499	1.06945
chr1	16212085	16212528	0.191109	1.02217	2.41917	8878	9100	-	-9100	SPEN	1404	0.24	up	7.41e-130	-0.5	down	0.459	2.02917	4.25848	1.06945
chr2	161777309	161777626	0.477773	1.35287	1.50163	127490	127649	+	127649	ENSG00000232337	1941	0	no	NA	0	no	NA	2.41113	5.0726	1.07302
chr2	201117330	201117806	0.318515	1.29275	2.021	52798	53036	+	53036	SPATS2L	584	0.96	up	1.59e-40	0.35	up	9.26e-05	1.02652	2.16055	1.07364
chr17	69177074	69177657	0.732586	1.80383	1.29999	156822	157114	+	157114	FLJ40176	195	0	no	NA	0	no	NA	0.668432	1.40906	1.07588
chr3	185374095	185374585	0.191109	1.92409	3.3317	6784	7029	-	-7029	IGF2BP2	380	0.23	up	1.32e-09	0.18	up	0.224	3.53314	7.48365	1.08279
chr5	171182620	171183057	0.477773	1.20255	1.3317	17600	17818	+	17818	C5orf50	705	0	no	NA	0	no	NA	0.93103	1.97268	1.08326
chr18	42746099	42746853	0.509625	2.40511	2.23859	1120	1497	+	1497	SLC14A2	2271	2.44	up	0.785	2.06	up	0.0992	1.93368	4.10192	1.08495
chr4	41144871	41145576	0.222961	1.86396	3.06351	42216	42568	-	-42568	APBB2	550	0.95	up	4.46e-28	1.13	up	1.25e-06	2.93633	6.23116	1.08549
chr3	153292301	153292651	0.191109	1.0823	2.50163	71815	71990	-	-71990	C3orf79	580	0	no	NA	0	no	NA	0.572942	1.22118	1.09182
chr15	58839360	58840051	0.350367	1.89402	2.43451	16156	16501	+	16501	LIPC	1530	0.5	up	0.686	0.33	up	0.805	3.15118	6.73215	1.09518
chr3	43750393	43750985	0.382219	2.07441	2.44023	2188	2484	+	2484	ABHD5	1650	-0.39	down	2.92e-25	-0.14	down	0.000161	0.907158	1.94137	1.09765
chr17	54218445	54219232	0.41407	1.83389	2.14696	11604	11998	+	11998	ANKFN1	2426	1.95	up	3.91e-130	0.56	up	1.94e-08	2.07691	4.44635	1.09818
chr2	86299192	86300001	0.382219	2.43517	2.67155	2370	2775	+	2775	POLR1A	3895	-0.05	down	1.09e-10	-0.1	down	7.93e-06	1.43235	3.06861	1.0992
chr3	12266234	12266746	0.350367	1.80383	2.36413	12125	12381	+	12381	TAFA-5	756	0	no	NA	0	no	NA	1.50397	3.22517	1.1006
chr2	39757420	39757965	0.573328	1.44306	1.3317	11604	11876	-	-11876	TMEM178	329	0.38	up	0.435	2.29	up	0.0238	1.76657	3.78879	1.10079
chr8	80267877	80268329	0.0318515	0.871852	4.77465	41171	41397	-	-41397	ENSG00000253659	633	0	no	NA	0	no	NA	1.31299	2.81811	1.10187
chr1	170879599	170880118	0.41407	1.413	1.77082	24494	24754	+	24754	C1orf129	3165	0.55	up	0.521	-0.95	down	0.469	2.12466	4.5716	1.10547
chr17	73689650	73690199	0.382219	1.29275	1.75797	1680	1954	-	-1954	SAP30BP	870	0.12	up	0.829	0.14	up	0.811	4.22544	9.11189	1.10865
chr2	43496877	43497419	0.445922	1.86396	2.06351	7021	7292	+	7292	THADA	382	0.4	up	0.000186	0.05	up	0.119	2.88858	6.23116	1.10914
chr11	128080220	128080851	0.222961	1.56332	2.80975	247804	248120	+	248120	ETS1	4981	-0.21	down	0	0	down	0.0476	1.95755	4.22717	1.11064
chr8	48425939	48426441	0.191109	1.413	2.88629	1236	1487	-	-1487	ENSG00000253330	1108	-0.15	down	0.0171	-0.1	down	0.176	3.05569	6.6069	1.11248
chr6	85125952	85126376	0.41407	1.29275	1.64249	4370	4582	+	4582	ENSG00000231776	504	-10000	down	0.182	-10000	down	0.736	0.883285	1.91005	1.11266
chr11	46670762	46671247	0.254812	1.29275	2.34293	484	727	-	-727	ATG13	562	0.11	up	0.366	0	down	0.312	1.36074	2.94336	1.11308
chr2	175961991	175962329	0.445922	0.931979	1.06351	-50	119	+	119	ATF2	1622	-0.12	down	3.05e-88	-0.12	down	0.439	0.549069	1.18987	1.11574
chr3	141994598	141995076	0.445922	0.992107	1.15371	30373	30612	+	30612	XRN1	10053	0.2	up	1.15e-23	-0.02	down	0.282	1.64721	3.56961	1.11574
chr5	172885741	172886290	0.191109	1.38294	2.85527	4212	4487	+	4487	ENSG00000253141	753	10000	up	0.539	10000	up	0.675	2.26789	4.91604	1.11614
chr11	66659596	66659993	0.382219	0.841788	1.13906	12540	12738	-	-12738	PC	4571	1.15	up	1.87e-07	0.54	up	1.83e-126	1.16976	2.5363	1.11652
chr18	43097133	43097784	0.41407	1.62345	1.97111	13342	13668	-	-13668	FLJ44087	3182	10000	up	NA	-1.07	down	0.792	2.05304	4.47767	1.12498
chr3	99228150	99228593	0.350367	1.17249	1.74264	2120	2341	-	-2341	ENSG00000243089	465	10000	up	0.0699	0	no	0.273	2.6976	5.88672	1.12579
chr10	44289182	44289581	0.509625	1.0823	1.08659	3318	3517	-	-3517	HNRNPA3P1	3006	-1.92	down	0.767	0.68	up	0.736	0.93103	2.0353	1.12834
chr8	124852148	124852626	0.350367	1.92409	2.45723	11601	11840	+	11840	FER1L6	6051	-0.22	down	1	0.7	up	0.0235	1.36074	2.97467	1.12834
chr4	95498336	95498636	0.445922	0.931979	1.06351	1247	1397	-	-1397	PDLIM5	554	-0.24	down	0.0451	0.75	up	8.97e-08	0.787795	1.72218	1.12834
chr10	18446700	18448062	0.286664	2.37504	3.05052	6502	7183	-	-7183	CACNB2	497	10000	up	0.0357	0	no	NA	1.4801	3.25648	1.13762
chr8	6517915	6518479	0.605179	1.38294	1.1923	11587	11869	-	-11869	ENSG00000249898	2147	1.46	up	0.0319	1.32	up	0.000501	2.12466	4.69685	1.14446
chr14	75709187	75709739	0.191109	1.50319	2.97556	35742	36018	+	36018	FOS	2158	2.16	up	0	1.99	up	1.32e-72	0.381961	0.845433	1.14627
chr5	148514992	148515507	0.318515	2.31492	2.86152	5538	5796	+	5796	ABLIM3	4164	1.95	up	5.99e-57	0.55	up	3.88e-176	2.07691	4.60291	1.14811
chr5	91887742	91888915	0.382219	3.66779	3.26244	236	822	+	822	ENSG00000249776	264	10000	up	0.139	0	no	0.435	1.24137	2.75549	1.15037
chr20	31718296	31718778	0.732586	1.17249	0.678507	18739	18980	-	-18980	C20orf186	1131	1.93	up	0.0544	-2.24	down	0.00237	0.859412	1.91005	1.15219
chr14	64541607	64542238	0.318515	2.28485	2.84267	96	411	+	411	SYNE2	11098	1.91	up	0	0.09	up	2.39e-72	0.787795	1.75349	1.15434
chr9	107954045	107954441	0.445922	0.871852	0.967292	5007	5205	-	-5205	ENSG00000238208	3760	0	no	NA	0	no	NA	0.787795	1.75349	1.15434
chr18	25991772	25992168	0.382219	1.0823	1.50163	234327	234525	-	-234525	CDH2	4367	-0.66	down	2.8e-73	-0.41	down	5.24e-23	1.19363	2.66155	1.15691
chr2	100221605	100222001	0.477773	1.17249	1.29518	11653	11851	-	-11851	AFF3	1800	-2.49	down	0.448	-1.48	down	8.27e-22	0.883285	1.97268	1.1592
chr5	157453499	157453970	0.41407	1.56332	1.91667	36500	36736	-	-36736	ENSG00000253743	1670	0.11	up	0.472	-2.03	down	0.864	0.978775	2.19186	1.16311
chr4	107416683	107417076	0.573328	1.32281	1.20617	6352	6548	+	6548	LOC100507096	1644	0	no	3.04e-09	0	no	NA	1.14588	2.56761	1.16397
chr2	145756701	145757201	0.509625	1.17249	1.20207	23461	23711	+	23711	DKFZp686O1327	491	1.12	up	0.018	1.35	up	0.278	1.4801	3.31911	1.1651
chr20	46093156	46093701	0.41407	1.89402	2.19351	13258	13530	+	13530	bA456N23,1	327	0	no	0.539	0	no	NA	1.81432	4.0706	1.16582
chr18	71918821	71919334	0.318515	1.0823	1.76466	1192	1449	+	1449	CYB5A	808	0.7	up	0.0191	0.64	up	4.12e-19	0.334216	0.751496	1.16899
chr5	65956934	65957476	0.509625	1.86396	1.87086	683	954	+	954	ENSG00000249057	658	0	no	NA	0	no	NA	0.596814	1.34643	1.17379
chr9	132419128	132419428	0.318515	1.11236	1.80419	8492	8642	+	8642	PRRX2	1312	0.81	up	4.53e-50	0.61	up	1.48e-40	1.05039	2.37974	1.17987
chr10	78095904	78096554	0.222961	1.59338	2.83723	11745	12070	-	-12070	C10orf11	307	1.14	up	0.818	0.32	up	0.113	2.29177	5.19785	1.18145
chr4	15416184	15416794	0.127406	1.47313	3.53138	2361	2666	-	-2666	AK130568	1502	0	no	0.539	-1.15	down	0.594	1.14588	2.59892	1.18145
chr3	186557554	186558148	0.286664	1.413	2.30133	2315	2612	+	2612	ADIPOQ	4629	1.71	up	0.000264	0	no	1	0.716177	1.62824	1.18493
chr8	17435576	17435951	0.605179	1.26268	1.06106	844	1031	-	-1031	PDGFRL	2222	3.64	up	2.81e-13	1.62	up	1.45e-34	0.644559	1.47168	1.19108
chr14	86762554	86762926	0.318515	1.62345	2.34963	668284	668470	-	-668470	FLRT2	7179	-0.52	down	5.09e-57	-0.71	down	2.07e-30	0.74005	1.69087	1.19207
chr6	22821979	22822551	0.41407	1.47313	1.83094	194403	194689	+	194689	ENSG00000233358	353	0	no	NA	0	no	NA	1.02652	2.34843	1.19393
chr10	44187480	44187879	0.573328	0.931979	0.700938	17330	17529	-	-17529	bA402L1,3	1932	0	no	NA	10000	up	NA	1.50397	3.44436	1.19546
chr6	16929869	16930511	0.159258	3.06651	4.26716	162756	163077	-	-163077	AK091312	2537	-1.97	down	4.06e-11	-0.76	down	0.0128	0.286471	0.657559	1.19873
chr10	4325951	4326615	0.350367	1.65351	2.23859	39970	40302	-	-40302	ENSG00000233117	445	2.89	up	0.00421	0.2	up	0.0688	2.84084	6.57559	1.21081
chr10	75807513	75807999	0.254812	1.71364	2.74956	4664	4907	-	-4907	VCL	268	0.34	up	0.15	0.98	up	0.0216	1.12201	2.59892	1.21183
chr2	188391964	188392363	0.254812	1.11236	2.12612	-42	157	-	-157	ENSG00000224063	802	-0.58	down	0.307	1.99	up	1	1.14588	2.66155	1.21581
chr2	43986335	43986901	0.159258	1.56332	3.29518	5720	6003	+	6003	PLEKHH2	632	-0.24	down	7.76e-10	1.03	up	0.735	1.43235	3.35042	1.22595
chr1	95155466	95155932	0.191109	1.02217	2.41917	10485	10718	-	-10718	ENSG00000244433	438	10000	up	NA	-2.11	down	0.322	0.883285	2.06661	1.22632
chr10	130903436	130904018	0.605179	1.20255	0.990667	145110	145401	-	-145401	ENSG00000232985	375	0	no	NA	0	no	NA	1.12201	2.63024	1.22911
chr6	111885632	111886240	0.573328	1.68358	1.5541	1404	1708	-	-1708	TRAF3IP2	297	0.18	up	0.578	-0.51	down	0.883	1.69495	3.97667	1.23032
chr15	63539237	63539689	0.541476	1.29275	1.25547	12108	12334	+	12334	RAB8B	2400	-0.11	down	3.76e-291	-0.05	down	3.27e-05	1.4801	3.47567	1.2316
chr8	70556046	70556401	0.254812	1.26268	2.30898	2664	2842	-	-2842	SULF1	388	-0.19	down	8.06e-173	0.38	up	1.01e-06	1.52784	3.60092	1.23687
chr4	114370681	114371176	0.254812	1.71364	2.74956	1012	1260	+	1260	CAMK2D	5294	-0.54	down	1	0.01	up	7.23e-06	1.67108	3.94536	1.23937
chr19	2634531	2634926	0.509625	0.992107	0.96106	22670	22868	-	-22868	AK130337	1708	1.33	up	1	0.15	up	1	3.46152	8.17252	1.23937
chr13	21607585	21608135	0.573328	1.53326	1.41917	10317	10592	-	-10592	LATS2	495	0.17	up	0	0.81	up	3.11e-08	1.55172	3.66354	1.23937
chr1	73101233	73101789	0.477773	1.413	1.56436	112815	113093	+	113093	ENSG00000225087	499	0	no	NA	0.93	up	1	0.978775	2.31711	1.24328
chr2	223958044	223958642	0.382219	1.53326	2.00413	37689	37988	-	-37988	KCNE4	3291	0.15	up	0	0.56	up	2.06e-20	1.59946	3.78879	1.24415
chr1	65891346	65891835	0.350367	1.44306	2.0422	1858	2102	+	2102	LEPR	377	1.05	up	3.41e-35	1.07	up	1.79e-10	2.76922	6.57559	1.24764
chr18	57590343	57590921	0.41407	1.11236	1.42568	18805	19094	-	-19094	PMAIP1	1936	-0.19	down	0	-0.35	down	0.0502	0.381961	0.908058	1.24936
chr9	73095300	73095951	0.668883	2.01428	1.59044	48024	48349	+	48349	LOC100507400	725	10000	up	NA	0	no	NA	3.12731	7.45234	1.25277
chr11	94809521	94810098	0.445922	1.56332	1.80975	5134	5422	-	-5422	SRSF8	4333	0.21	up	0.255	0.41	up	9.85e-11	0.668432	1.59693	1.25645
chr18	65092814	65093326	0.286664	1.35287	2.23859	80493	80749	+	80749	DSEL	9531	1.7	up	1.05e-132	0.47	up	1.29e-70	1.88593	4.50898	1.25752
chr9	78166736	78167173	0.254812	1.26268	2.30898	27412	27631	+	27631	ENSG00000236376	458	0	no	NA	0	no	NA	1.69495	4.0706	1.264
chr16	57925897	57926496	0.254812	1.35287	2.40852	8050	8349	-	-8349	CNGB1	4034	10000	up	0.139	-10000	down	0.43	1.28912	3.09992	1.26585
chr9	33330047	33330445	0.254812	0.901915	1.82356	2210	2409	+	2409	NFX1	391	0.34	up	0.0246	-0.34	down	0.00764	1.16976	2.81811	1.26852
chr10	4103693	4104326	0.350367	2.1646	2.62716	9776	10092	-	-10092	ENSG00000236990	2289	10000	up	0.539	10000	up	0.273	2.07691	5.00997	1.27036
chr5	55860506	55861424	0.477773	6.85456	3.84267	26853	27312	-	-27312	ENSG00000234553	536	0	no	NA	0	no	NA	0.453579	1.09593	1.27273
chr4	74782835	74783299	0.222961	1.0823	2.27924	21022	21254	+	21254	ENSG00000249920	958	10000	up	NA	-10000	down	0.322	1.55172	3.75748	1.2759
chr4	138562691	138563148	0.445922	1.0823	1.27924	3270	3499	+	3499	ENSG00000250126	396	0	no	NA	-0.15	down	0.594	0.978775	2.37974	1.28175
chr7	42519366	42520226	0.541476	1.77377	1.71185	181099	181529	+	181529	ENSG00000238284	1171	0	no	NA	0	no	NA	2.29177	5.5736	1.28215
chr5	106761273	106761776	0.286664	1.56332	2.44718	902	1153	+	1153	EFNA5	931	-1.05	down	0.928	-0.11	down	0.000198	1.50397	3.66354	1.28446
chr6	133823493	133824366	0.509625	2.04434	2.00413	104	540	-	-540	LOC100507308	753	1.56	up	0.514	2.14	up	0.0598	1.00265	2.44236	1.28446
chr1	184836265	184836626	0.637031	1.44306	1.1797	548	729	+	729	FAM129A	3118	-2.79	down	1.89e-85	-3.35	down	3.06e-86	0.525196	1.28381	1.2895
chr4	121364132	121364801	0.222961	1.59338	2.83723	26210	26545	-	-26545	ENSG00000250938	558	10000	up	NA	10000	up	NA	1.33686	3.2878	1.29827
chr5	43432666	43433101	0.541476	1.71364	1.66209	11252	11470	+	11470	C5orf28	2761	-0.12	down	1.83e-08	-0.02	down	0.711	0.381961	0.93937	1.29827
chr3	41013001	41013485	0.477773	1.62345	1.76466	-68	174	-	-174	ENSG00000233096	670	0	no	NA	0	no	NA	1.55172	3.82011	1.29975
chr14	61029826	61030304	0.191109	1.20255	2.65363	8214	8453	-	-8453	SIX6	1288	0	no	NA	0	no	1	1.55172	3.82011	1.29975
chr18	3155462	3156083	0.445922	1.44306	1.69427	19816	20127	-	-20127	MYOM1	1901	-0.28	down	0.00199	-0.12	down	0.871	1.38461	3.41305	1.30158
chr10	4100802	4101276	0.350367	0.992107	1.50163	6884	7121	-	-7121	ENSG00000236990	2289	10000	up	0.539	10000	up	0.273	1.43235	3.53829	1.30467
chr10	3542465	3543044	0.573328	1.65351	1.5281	1986	2276	+	2276	ENSG00000233321	832	0	no	NA	0	no	NA	0.716177	1.7848	1.31738
chr2	37816983	37817869	0.286664	2.91619	3.34665	9410	9853	+	9853	ENSG00000236213	548	-0.33	down	0.904	0.17	up	0.36	2.72147	6.79478	1.32004
chr14	52836045	52836675	0.477773	2.19466	2.1996	40721	41036	-	-41036	PTGER2	2383	4	up	7.25e-249	2.12	up	5.39e-289	2.81696	7.04528	1.32252
chr10	78141651	78142701	0.477773	2.22472	2.21923	13558	14083	+	14083	C10orf11	208	1.45	up	0.56	0.66	up	0.112	3.12731	7.82809	1.32374
chr3	32955211	32956053	0.573328	2.01428	1.81283	21440	21861	-	-21861	TRIM71	3138	0	no	0.277	0	no	1	0.525196	1.31512	1.32426
chr6	55334743	55335251	0.477773	1.80383	1.91667	30217	30471	-	-30471	HMGCLL1	512	0	no	NA	0	no	NA	0.262598	0.657559	1.32426
chr1	78300595	78301076	0.318515	1.20255	1.91667	11716	11957	+	11957	ENSG00000235613	1695	0.08	up	0.000149	0.28	up	0.537	1.33686	3.35042	1.32549
chr2	28887849	28888605	0.350367	1.62345	2.21212	443	821	-	-821	ENSG00000230730	581	0	no	NA	0	no	NA	2.0053	5.04129	1.32998
chr5	158202325	158202990	0.509625	1.89402	1.89395	44274	44606	-	-44606	EBF1	766	-0.12	down	8.45e-11	-0.14	down	0.491	2.12466	5.35441	1.3335
chr6	122013144	122013677	0.222961	1.20255	2.43124	7732	7998	-	-7998	ENSG00000217139	1342	0.27	up	4.2e-64	-0.21	down	0.912	1.28912	3.25648	1.33693
chr10	60542714	60543176	0.637031	1.47313	1.20945	1584	1815	+	1815	BICC1	2619	0.69	up	1.63e-24	0.32	up	1.76e-13	1.31299	3.31911	1.33794
chr2	106134231	106134730	0.41407	1.17249	1.50163	78500	78750	-	-78750	FHL2	1485	0.2	up	0.00541	0.23	up	1	1.76657	4.47767	1.3418
chr8	80269386	80269926	0.477773	1.47313	1.62449	42680	42950	-	-42950	ENSG00000253659	633	0	no	NA	0	no	NA	1.88593	4.79079	1.34498
chr7	123366996	123367598	0.318515	1.35287	2.08659	4482	4783	-	-4783	AK025323	1810	0	no	NA	0	no	NA	0.811667	2.06661	1.34831
chr1	172715237	172715931	0.318515	3.9083	3.61711	1769	2116	+	2116	ENSG00000229785	943	0.5	up	0.000448	0.31	up	0.0786	0.83554	2.12924	1.34956
chr12	89728554	89728901	0.41407	1.26268	1.60854	12936	13109	+	13109	DUSP6	2820	-0.42	down	1.82e-71	0.13	up	0.0614	0.978775	2.50499	1.35575
chr6	75342015	75342517	0.382219	1.50319	1.97556	9583	9834	+	9834	ENSG00000224583	441	-10000	down	1	0	no	NA	2.05304	5.26047	1.35743
chr8	70536476	70536976	0.732586	1.83389	1.32384	1213	1463	+	1463	SULF1	445	-0.06	down	0	0.23	up	3.08e-12	1.55172	3.97667	1.35769
chr16	53805605	53806301	0.350367	1.59338	2.18516	37749	38097	+	38097	FTO	2543	0.15	up	0.000442	0.33	up	1	2.62598	6.73215	1.35821
chr4	187507359	187507835	0.350367	1.11236	1.66669	1102	1340	+	1340	FAT1	14764	0.38	up	2.06e-55	0.41	up	8.41e-21	0.525196	1.34643	1.35821
chr2	23472238	23472690	0.477773	1.0823	1.1797	50311	50537	-	-50537	ENSG00000232451	506	0	no	NA	0	no	NA	0.549069	1.40906	1.35967
chr18	65192481	65193237	0.350367	1.77377	2.33988	8264	8642	-	-8642	DSEL	9525	1.7	up	5.16e-134	0.47	up	3.86e-71	1.12201	2.88074	1.36035
chr17	43164911	43165263	0.350367	1.11236	1.66669	1037	1213	-	-1213	NMT1	3751	0.24	up	0.72	-0.06	down	0.519	2.29177	5.88672	1.361
chr3	12199919	12200251	0.509625	1.02217	1.00413	-102	64	+	64	SYN2	550	4.31	up	3e-102	2.77	up	2.41e-18	1.71882	4.41504	1.361
chr17	67497489	67497951	0.700734	1.80383	1.36413	181	412	+	412	MAP2K6	1086	-2.59	down	0.813	-0.72	down	0.318	0.692304	1.7848	1.36629
chr2	43540315	43540912	0.254812	1.44306	2.50163	19382	19680	+	19680	THADA	549	1.1	up	0.482	0.2	up	0.205	0.692304	1.7848	1.36629
chr14	69017122	69017453	0.477773	0.962043	1.00978	10156	10322	-	-10322	RAD51L1	546	-0.3	down	7.07e-06	0.31	up	0.544	3.58089	9.23714	1.36713
chr5	15452844	15453262	0.159258	0.962043	2.59474	924	1133	-	-1133	ENSG00000248699	1111	-0.18	down	4.83e-14	-0.16	down	0.348	0.811667	2.09793	1.37
chr6	132297499	132298201	0.286664	2.46524	3.10429	24981	25332	-	-25332	CTGF	2344	0.81	up	0.0406	0.43	up	2.91e-53	2.62598	6.79478	1.37157
chr1	171110529	171111847	0.318515	3.27696	3.36292	3288	3947	-	-3947	FMO6P	1730	10000	up	0.0699	0	no	0.273	1.95755	5.0726	1.37368
chr10	65441862	65442436	0.637031	1.98421	1.63913	17438	17725	-	-17725	ENSG00000228566	794	0	no	NA	-10000	down	0.594	1.2175	3.16255	1.37716
chr16	14621682	14622077	0.318515	1.17249	1.88014	71714	71912	+	71912	PARN	808	-0.32	down	5.93e-28	0.1	up	0.467	1.31299	3.41305	1.3782
chr2	122259688	122260387	0.382219	3.78805	3.30898	408	758	+	758	CLASP1	3963	0.51	up	1.26e-34	0.43	up	3.46e-08	1.71882	4.47767	1.38132
chr3	142033812	142034260	0.0955546	0.931979	3.2859	3229	3453	+	3453	XRN1	393	0.18	up	0.000272	0.18	up	0.805	0.238726	0.626247	1.39138
chr1	42238659	42239427	0.41407	2.55543	2.62562	71987	72371	-	-72371	HIVEP3	8465	-0.21	down	2.5e-18	1.05	up	0.00232	0.93103	2.44236	1.39138
chr6	73058624	73059037	0.159258	0.992107	2.63913	16440	16646	+	16646	RIMS1	1842	-0.09	down	1.72e-16	0.62	up	0.726	0.644559	1.69087	1.39138
chr8	133966566	133967064	0.732586	1.17249	0.678507	8175	8424	+	8424	TG	185	-10000	down	0.672	10000	up	NA	0.859412	2.25449	1.39138
chr13	76867337	76867750	0.477773	1.20255	1.3317	278700	278907	-	-278907	ENSG00000224933	279	0	no	NA	0	no	NA	1.00265	2.63024	1.39138
chr10	74003407	74004151	0.445922	2.01428	2.1754	7789	8161	-	-8161	ANAPC16	3195	0.38	up	1.64e-07	0.18	up	1.09e-09	2.50662	6.6069	1.39823
chr9	71746519	71747162	0.41407	1.65351	1.99759	8554	8876	-	-8876	TJP2	4297	0.54	up	1.68e-57	0.12	up	0.0108	1.16976	3.09992	1.40602
chr6	132301089	132301715	0.286664	1.56332	2.44718	28571	28884	-	-28884	CTGF	2344	0.81	up	0.0406	0.43	up	2.91e-53	2.10079	5.5736	1.40768
chr5	131007881	131008508	0.350367	2.04434	2.5447	242	556	-	-556	RAPGEF6/FNIP1	3973	-0.48	down	0	-0.58	down	2.3e-09	1.59946	4.25848	1.41275
chr7	32060053	32060652	0.318515	2.04434	2.6822	30514	30814	+	30814	PDE1C	593	-0.4	down	0.523	0.09	up	0.00169	1.4801	3.94536	1.41446
chr1	65376366	65376742	0.318515	1.44306	2.1797	7383	7571	+	7571	ENSG00000234784	245	0	no	NA	0	no	NA	0.644559	1.72218	1.41785
chr11	26868915	26869401	0.382219	1.62345	2.08659	123941	124184	-	-124184	SLC5A12	1932	-0.52	down	0.578	-0.11	down	0.594	1.88593	5.04129	1.41851
chr9	78725013	78725437	0.477773	1.35287	1.50163	14120	14332	-	-14332	PCSK5	5137	1.06	up	2.34e-54	0.4	up	0.174	0.596814	1.59693	1.41995
chr11	66703697	66704175	0.0955546	0.931979	3.2859	15592	15831	+	15831	PC	512	1.07	up	1	0.52	up	0.000291	1.19363	3.19386	1.41995
chr9	98901832	98902305	0.254812	1.29275	2.34293	6002	6239	+	6239	ENSG00000224546	1835	0.04	up	5.43e-30	-0.09	down	0.944	1.16976	3.13123	1.42052
chr11	72957245	72957766	0.509625	1.47313	1.53138	4984	5244	-	-5244	AK094727	2243	0.94	up	0.0292	0.63	up	1.74e-07	1.67108	4.47767	1.42197
chr9	137032695	137033115	0.286664	0.992107	1.79114	3009	3219	-	-3219	RNU6ATAC	125	-0.71	down	0.427	0.15	up	0.665	0.549069	1.47168	1.4224
chr16	15670234	15670534	0.191109	0.811724	2.08659	5101	5251	+	5251	C16orf45	1800	0.15	up	0.000389	0.06	up	0.374	0.525196	1.40906	1.4238
chr20	39877172	39877726	0.41407	2.10447	2.34551	23172	23449	+	23449	ZHX3	836	0.7	up	0.000427	1.07	up	9.89e-12	2.9602	7.95334	1.42587
chr9	110904851	110905609	0.637031	3.72792	2.54893	44661	45040	-	-45040	ENSG00000237360	479	10000	up	NA	0	no	NA	1.95755	5.26047	1.42614
chr13	97777344	97778160	0.477773	1.83389	1.94051	15930	16338	+	16338	MBNL2	4555	-0.08	down	4.86e-91	-0.33	down	0.764	1.12201	3.0373	1.4367
chr13	75335826	75336642	0.445922	2.07441	2.21784	66048	66456	+	66456	ENSG00000225944	1528	-0.1	down	1.72e-06	0.16	up	0.942	1.12201	3.0373	1.4367
chr18	3367644	3368201	0.445922	1.53326	1.78174	9714	9992	+	9992	ENSG00000240364	332	0	no	NA	0	no	NA	1.40848	3.82011	1.43947
chr3	90064908	90065551	0.382219	1.47313	1.94641	185914	186236	+	186236	PROS2	1951	10000	up	0.539	0	no	NA	2.45887	6.66953	1.43959
chr1	107520854	107521394	0.350367	1.56332	2.15767	77873	78143	+	78143	PRMT6	2650	-0.08	down	6.75e-32	-0.35	down	7.29e-06	0.334216	0.908058	1.442
chr8	133963685	133964026	0.382219	1.53326	2.00413	11212	11383	+	11383	TG	185	-10000	down	0.672	10000	up	NA	1.31299	3.56961	1.44291
chr13	36474433	36475030	0.382219	1.59338	2.05962	44436	44734	-	-44734	DCLK1	899	0.15	up	0.216	-1.43	down	0.718	0.620687	1.69087	1.44583
chr16	66284544	66285384	0.318515	1.71364	2.42763	113137	113557	+	113557	CDH5	4248	-0.42	down	0.326	10000	up	NA	1.52784	4.16454	1.44666
chr15	35982899	35983634	0.541476	1.59338	1.55712	137160	137528	-	-137528	AK000932	1527	0	no	NA	0	no	NA	1.7427	4.75948	1.44948
chr5	78731942	78732541	0.0955546	2.61555	4.77465	14866	15166	+	15166	AK098353	1853	-10000	down	1	0	no	NA	0.286471	0.782809	1.45027
chr8	123608048	123608504	0.382219	1.26268	1.72402	74120	74348	+	74348	ENSG00000253819	571	0	no	NA	0	no	NA	1.12201	3.06861	1.4515
chr8	128222826	128223326	0.637031	1.23262	0.95229	2715	2965	-	-2965	LOC100507056/LOC100509708	2131	10000	up	NA	0	no	1	1.33686	3.66354	1.45439
chr2	121289793	121290215	0.541476	1.62345	1.58409	10270	10481	+	10481	ENSG00000237614	528	-1.48	down	0.326	0.15	up	0.321	0.978775	2.69286	1.46009
chr11	3145351	3146007	0.41407	1.47313	1.83094	1692	2020	-	-2020	OSBPL5	3183	1.59	up	0.0177	0.96	up	3.8e-75	2.19628	6.04328	1.46027
chr3	101849104	101849506	0.191109	0.811724	2.08659	31016	31217	-	-31217	ZPLD1	2189	0.23	up	1	10000	up	NA	1.19363	3.2878	1.46177
chr10	115095204	115095702	0.605179	1.92409	1.66874	146543	146792	+	146792	LOC100505998	541	3.71	up	0.672	10000	up	0.0686	0.238726	0.657559	1.46177
chr3	12185474	12186109	0.41407	1.50319	1.86008	-60	257	+	257	SYN2	3127	4.04	up	2.44e-18	2.36	up	0.00181	1.64721	4.54029	1.46276
chr18	8341519	8342164	0.318515	1.95415	2.61711	18654	18976	+	18976	LOC100192426	616	0	no	NA	0	no	1	1.40848	3.88273	1.46293
chr2	198069699	198070125	0.700734	1.62345	1.21212	5702	5915	-	-5915	ENSG00000231621	455	0	no	NA	0	no	NA	1.16976	3.22517	1.46317
chr9	4774344	4774651	0.509625	1.62345	1.67155	6824	6977	+	6977	ENSG00000220105	604	-2.02	down	1	-2.37	down	0.805	0.405834	1.12724	1.47384
chr12	117032813	117033522	0.445922	2.25479	2.33813	11336	11691	-	-11691	AK055084	2699	0	no	NA	0	no	NA	1.09814	3.06861	1.48253
chr6	141178808	141179686	0.350367	2.61555	2.90018	4747	5186	-	-5186	ENSG00000234147	453	-1.25	down	0.103	-10000	down	0.322	1.24137	3.47567	1.48535
chr9	33328965	33329560	0.286664	1.26268	2.13906	3096	3393	+	3393	NFX1	391	0.34	up	0.0246	-0.34	down	0.00764	1.38461	3.88273	1.48759
chr8	13104543	13104976	0.541476	1.71364	1.66209	28842	29059	+	29059	DLC1	560	0.08	up	0.602	-1.82	down	0.198	1.14588	3.22517	1.49292
chr2	100482301	100482816	0.605179	1.62345	1.42363	7392	7649	+	7649	AK057150	2559	0	no	NA	0	no	NA	0.811667	2.2858	1.49374
chr8	6462691	6463377	0.477773	2.826	2.56436	9747	10090	+	10090	LOC100131112/LOC100507530	1596	2.26	up	0.0245	1.64	up	4.15e-05	1.52784	4.3211	1.4999
chr1	185453242	185453626	0.732586	1.32281	0.852536	34157	34349	+	34349	AK130477	2336	0	no	NA	0	no	NA	1.64721	4.66554	1.50202
chr4	20605656	20605956	0.222961	1.20255	2.43124	5680	5830	-	-5830	SLIT2	395	-0.99	down	0.858	0	up	1.26e-11	0.596814	1.69087	1.50241
chr10	91241308	91241711	0.318515	1.20255	1.91667	13400	13602	-	-13602	LOC100507596	562	10000	up	0.139	0.7	up	0.594	1.67108	4.75948	1.51002
chr8	133911411	133912089	0.605179	2.07441	1.77726	166	505	-	-505	TG	334	1.23	up	1	-0.34	down	1	0.811667	2.31711	1.51337
chr3	185570237	185570819	0.350367	1.413	2.01182	27410	27701	-	-27701	IGF2BP2	2045	0.6	up	2.02e-36	0.34	up	0.0197	0.811667	2.31711	1.51337
chr5	175834590	175835016	0.286664	0.871852	1.60472	-2	211	-	-211	CLTB	581	1.55	up	0.00502	0.46	up	0.0164	1.02652	2.94336	1.5197
chr2	48359024	48359447	0.541476	1.05223	0.958486	108674	108886	+	108886	ENSG00000230773	1808	0	no	NA	0	no	NA	0.381961	1.09593	1.52066
chr21	22737172	22737601	0.445922	1.14243	1.35724	8642	8857	+	8857	NCAM2	189	-0.91	down	0.476	-1.56	down	0.805	0.763922	2.19186	1.52066
chr15	58495739	58496157	0.222961	1.20255	2.43124	2525	2734	-	-2734	ENSG00000240934	410	-10000	down	1	10000	up	NA	1.67108	4.8221	1.52888
chr17	53532182	53532688	0.254812	1.29275	2.34293	32841	33094	-	-33094	MMD	2723	1.34	up	1.4e-05	0.05	up	3.89e-08	0.572942	1.65955	1.53434
chr10	63592658	63592958	0.350367	1.38294	1.9808	11654	11804	-	-11804	ENSG00000233643	477	-10000	down	1	0	no	NA	0.978775	2.84942	1.54162
chr2	238000594	238001051	0.477773	1.26268	1.40209	1732	1960	+	1960	COPS8	496	1.36	up	1.73e-17	0.6	up	3.86e-51	2.38726	6.95134	1.54194
chr15	36166333	36166939	0.637031	3.06651	2.26716	15131	15434	-	-15434	LOC100507466	1477	0.73	up	1	0.21	up	0.0566	0.525196	1.5343	1.54666
chr3	45037012	45037312	0.318515	1.29275	2.021	5728	5878	+	5878	CLEC3B/EXOSC7	708	2.23	up	0	0.88	up	0	1.07427	3.16255	1.55774
chr11	44768751	44769369	0.509625	1.65351	1.69803	5690	5999	-	-5999	AK096075	1805	0	no	NA	0	no	NA	1.45623	4.28979	1.55867
chr12	20618915	20619326	0.318515	1.26268	1.98706	39604	39810	-	-39810	AK000795	1948	0	no	NA	0	no	NA	1.09814	3.25648	1.56826
chr5	93778609	93779101	0.605179	1.7437	1.52672	29930	30176	-	-30176	KIAA0825	5751	0.41	up	1	0.12	up	0.762	0.262598	0.782809	1.5758
chr21	46468044	46468641	0.445922	1.68358	1.91667	22230	22528	+	22528	C21orf122	2257	1.04	up	0.00458	1.02	up	4.35e-05	1.57559	4.69685	1.5758
chr12	94207685	94208238	0.350367	1.92409	2.45723	35808	36085	+	36085	CRADD	688	-0.11	down	4.7e-07	-0.02	down	0.387	2.0053	5.98066	1.57649
chr9	91363628	91363928	0.286664	1.20255	2.06867	96553	96703	-	-96703	LOC286238	682	0	no	NA	0	no	NA	1.36074	4.0706	1.58086
chr3	186732265	186732885	0.318515	2.10447	2.72402	6758	7068	+	7068	ST6GAL1	568	2.4	up	0.00256	0.65	up	0.00293	1.43235	4.28979	1.58252
chr16	19147828	19148826	0.286664	2.28485	2.99467	14876	15375	-	-15375	ITPRIPL2	7699	0.89	up	2.09e-21	0.53	up	2.42e-64	1.45623	4.38373	1.58992
chr12	52888300	52888900	0.668883	2.07441	1.63287	1119	1419	-	-1419	KRT6A	2450	10000	up	NA	-10000	down	0.201	2.79309	8.42302	1.59248
chr3	104671218	104671958	0.318515	2.34498	2.88014	339879	340249	-	-340249	AK308948	1031	0	no	NA	0	no	NA	1.50397	4.54029	1.59401
chr5	106900464	106901078	0.159258	1.44306	3.1797	58572	58879	-	-58879	EFNA5	349	-0.69	down	0.481	-0.04	down	0.0162	1.07427	3.25648	1.59996
chr2	43691643	43692106	0.159258	1.26268	2.98706	1244	1476	-	-1476	THADA	698	1.13	up	1	0.08	up	0.0227	1.45623	4.41504	1.60019
chr2	197070469	197071008	0.318515	1.26268	1.98706	4468	4737	-	-4737	HECW2	4523	-1.74	down	1.41e-95	-0.6	down	1.68e-41	0.763922	2.31711	1.60083
chr21	44056620	44057097	0.509625	1.56332	1.61711	272	511	+	511	PDE9A	3046	1.21	up	0.526	10000	up	0.273	0.596814	1.81612	1.6055
chr8	129912810	129913426	0.445922	2.22472	2.31876	315287	315595	+	315595	LOC728724	1153	0	no	0.539	0	no	NA	1.38461	4.22717	1.61021
chr20	13258517	13258972	0.541476	1.14243	1.07713	1080	1308	+	1308	ISM1	3331	4.24	up	1.48e-35	0.28	up	1.61e-05	1.81432	5.54228	1.61106
chr5	124179185	124179779	0.350367	2.22472	2.66669	13202	13499	-	-13499	ENSG00000248443	819	0	no	NA	0	no	NA	0.429706	1.31512	1.61377
chr2	102666370	102667013	0.637031	2.28485	1.84267	13990	14312	+	14312	IL1R1	609	0.65	up	5.16e-106	0.68	up	3.51e-05	1.55172	4.75948	1.61694
chr19	18128158	18128751	0.286664	1.44306	2.3317	3246	3543	-	-3543	ARRDC2	2525	3.21	up	3.22e-147	1.89	up	0	1.4801	4.54029	1.61709
chr5	17896645	17897055	0.605179	0.901915	0.575629	22282	22487	+	22487	ENSG00000249937	459	0.85	up	0.427	0	no	NA	0.954903	2.94336	1.62404
chr10	31146841	31147198	0.700734	1.29275	0.883499	160	338	-	-338	ZNF438	2688	0.49	up	0.0264	0.23	up	0.00355	0.883285	2.72417	1.62487
chr9	91360211	91360804	0.477773	1.47313	1.62449	93136	93433	-	-93433	LOC286238	682	0	no	NA	0	no	NA	1.07427	3.31911	1.62745
chr18	56720428	56721042	0.350367	2.13453	2.60698	-18	289	-	-289	LOC390858	531	0	no	NA	0	no	NA	0.787795	2.44236	1.63239
chr3	60596290	60596651	0.41407	1.29275	1.64249	5904	6085	+	6085	ENSG00000240097	1258	0	no	NA	0	no	NA	0.644559	2.00399	1.63649
chr2	161725765	161726447	0.445922	1.92409	2.10931	178670	179011	+	179011	ENSG00000232337	1941	0	no	NA	0	no	NA	1.28912	4.00798	1.63649
chr1	24620838	24621224	0.477773	1.44306	1.59474	361	554	-	-554	ENSG00000232298	2339	0	no	0.139	0	no	1	1.86206	5.79278	1.63736
chr8	38720082	38720656	0.445922	1.32281	1.56874	9536	9823	-	-9823	TACC1	6145	1.02	up	1.27e-277	0.25	up	5.58e-36	1.02652	3.19386	1.63754
chr14	75130475	75131158	0.382219	1.7437	2.18968	48	390	-	-390	KIAA0317	972	0.69	up	2.95e-09	-0.02	down	0.413	1.2175	3.78879	1.63782
chr4	138556121	138556676	0.41407	1.53326	1.88865	9744	10021	+	10021	ENSG00000250126	396	0	no	NA	-0.15	down	0.594	1.40848	4.38373	1.63802
chr17	53803831	53804226	0.318515	1.20255	1.91667	3606	3803	-	-3803	TMEM100	1755	3.24	up	3.62e-80	1.19	up	6.25e-36	1.43235	4.47767	1.64436
chr3	32521979	32522530	0.286664	1.11236	1.95619	274	550	+	550	CMTM6	3863	0.48	up	0.00105	0.51	up	6.75e-31	0.453579	1.44037	1.66701
chr1	95205211	95205792	0.41407	1.89402	2.19351	2258	2549	+	2549	ENSG00000244433	532	0	no	0.0699	10000	up	NA	0.620687	1.97268	1.66822
chr7	80410865	80411251	0.254812	1.413	2.47126	11422	11615	+	11615	SEMA3C	1318	-0.73	down	1.81e-123	-0.76	down	2.28e-06	0.978775	3.13123	1.67768
chr16	53802353	53802905	0.41407	1.59338	1.94415	41145	41421	+	41421	FTO	2543	0.15	up	0.000442	0.33	up	1	1.81432	5.85541	1.69034
chr4	138659517	138660230	0.509625	2.37504	2.22045	3386	3743	-	-3743	ENSG00000250777	512	0	no	NA	0	no	NA	0.310343	1.00199	1.69094
chr2	99895328	99895651	0.318515	0.992107	1.63913	5050	5211	+	5211	TXNDC9/LYG1	990	-0.24	down	0.000206	1.01	up	0.716	0.358089	1.15856	1.69394
chr6	68339848	68340462	0.509625	1.53326	1.58909	250752	251059	+	251059	LOC100290497	2320	0	no	NA	0	no	NA	1.16976	3.78879	1.69553
chr10	74002376	74002974	0.254812	1.62345	2.67155	6758	7057	-	-7057	ANAPC16	3195	0.38	up	1.64e-07	0.18	up	1.09e-09	1.50397	4.88473	1.6995
chr9	78066124	78066673	0.477773	1.38294	1.53334	48216	48490	-	-48490	ENSG00000235707	1099	0	no	NA	0	no	NA	1.14588	3.72617	1.70123
chr14	89892140	89892675	0.0318515	1.50319	5.56052	6004	6271	-	-6271	LOC400236	1077	0.01	up	0.0372	0.35	up	0.00252	0.978775	3.19386	1.70625
chr13	67233382	67233921	0.509625	1.32281	1.3761	40928	41197	-	-41197	AK057821	1822	0	no	NA	0	no	NA	0.954903	3.13123	1.71331
chr9	137036937	137037500	0.318515	1.02217	1.6822	7250	7532	-	-7532	RNU6ATAC	125	-0.71	down	0.427	0.15	up	0.665	2.0053	6.6069	1.72016
chr8	128403257	128403922	0.350367	2.79594	2.99639	954	1286	+	1286	ENSG00000253929	290	0	no	NA	0	no	NA	1.62333	5.35441	1.72177
chr4	129405960	129406420	0.350367	1.62345	2.21212	9805	10035	-	-10035	LOC100507487	747	2.46	up	0.577	-0.63	down	0.101	0.74005	2.44236	1.72258
chrx	128882243	128882673	0.350367	1.05223	1.58652	999999999	999999999	?	1									0.596814	1.97268	1.7248
chr8	123613691	123614406	0.318515	1.89402	2.57202	68218	68576	+	68576	ENSG00000253819	571	0	no	NA	0	no	NA	1.62333	5.38572	1.73018
chr12	13299438	13299951	0.382219	1.32281	1.79114	42818	43075	-	-43075	GSG1	2055	0.37	up	0.601	1.93	up	0.792	1.64721	5.51097	1.74228
chr15	25982175	25982961	0.159258	2.73581	4.10253	887	1280	-	-1280	ATP10A	3760	1.04	up	2.05e-13	0.89	up	8.08e-74	1.55172	5.19785	1.74405
chr3	183088568	183088955	0.509625	1.86396	1.87086	852	1045	+	1045	MCF2L2	7666	0	no	NA	0	no	1	1.02652	3.44436	1.74647
chr2	139122183	139122627	0.41407	1.02217	1.30369	47009	47231	+	47231	ENSG00000232915	1253	-0.62	down	1	0.43	up	0.794	1.33686	4.50898	1.75395
chrx	106916984	106917413	0.191109	1.0823	2.50163	999999999	999999999	?	1									1.02652	3.47567	1.75953
chr1	65979565	65980150	0.382219	1.50319	1.97556	11222	11514	+	11514	LEPR	2117	5.4	up	0	3.5	up	0	1.52784	5.19785	1.76642
chr12	93521167	93521850	0.668883	3.5776	2.41917	28346	28688	-	-28688	LOC400590	456	-0.64	down	0.785	-1.95	down	1	1.64721	5.60491	1.76667
chr8	101494402	101494916	0.477773	1.56332	1.71022	465	722	+	722	ENSG00000253666	558	0	no	NA	0	no	NA	0.787795	2.69286	1.77325
chr4	74757726	74758215	0.445922	1.32281	1.56874	20766	21011	-	-21011	CXCL1	1109	0.48	up	4.17e-70	-0.01	down	0.0849	0.787795	2.69286	1.77325
chr5	112293919	112294576	0.286664	1.413	2.30133	17822	18151	+	18151	DCP2	8029	0.79	up	3.43e-133	0.04	up	0.000256	0.501324	1.72218	1.78042
chr9	91467738	91468063	0.350367	1.14243	1.70516	117744	117906	+	117906	ENSG00000225856	451	-1.43	down	0.767	10000	up	1	0.83554	2.91205	1.80125
chr17	60936427	60937197	0.41407	1.62345	1.97111	50722	51107	-	-51107	MARCH10	3101	5.29	up	7.79e-05	4.3	up	1.6e-30	1.2175	4.25848	1.80642
chr17	61689411	61689975	0.254812	1.17249	2.20207	865	1147	-	-1147	ENSG00000223527	418	-0.17	down	0.215	1.16	up	0.233	0.0716177	0.250499	1.80642
chr9	113337335	113337861	0.191109	1.14243	2.57963	3652	3915	+	3915	AK095133	2050	2.12	up	1e-126	1.1	up	2.34e-22	0.859412	3.00598	1.80642
chr6	25012824	25013326	0.191109	1.26268	2.72402	10194	10445	+	10445	ASSP1	1169	0.57	up	0.482	0.14	up	0.00129	1.38461	4.88473	1.8188
chr2	179163499	179163932	0.159258	0.992107	2.63913	13734	13951	-	-13951	OSBPL6	386	-0.09	down	0.666	-0.81	down	0.0013	0.620687	2.19186	1.82022
chr14	86154269	86154790	0.382219	1.17249	1.61711	60000	60260	-	-60260	FLRT2	7179	-0.52	down	5.09e-57	-0.71	down	2.07e-30	0.787795	2.7868	1.82272
chr1	184590289	184590851	0.605179	1.77377	1.55138	312	593	+	593	C1orf21	3052	0.87	up	0.00367	0.33	up	8.99e-18	1.24137	4.41504	1.83049
chr18	8139926	8140451	0.41407	1.38294	1.73979	52446	52709	+	52709	AK093169	2503	0	no	0.277	0	no	NA	1.71882	6.13722	1.83616
chr3	186780247	186780926	0.445922	1.65351	1.89067	8836	9176	+	9176	ST6GAL1	4893	1.94	up	1.25e-09	1.07	up	1.05e-47	1.31299	4.69685	1.83884
chr5	159213867	159214773	0.382219	3.72792	3.2859	10088	10541	-	-10541	ENSG00000253311	5607	0	no	NA	0	no	NA	1.67108	6.01197	1.84706
chr13	75770618	75771026	0.605179	2.37504	1.97252	40863	41067	+	41067	CTAGE11P	2629	0.14	up	0.0421	0.16	up	0.711	1.43235	5.16654	1.85081
chr2	201542609	201543391	0.477773	2.19466	2.1996	-347	44	-	-44	AOX2P	2112	10000	up	0.00939	10000	up	0.675	1.02652	3.72617	1.85993
chr7	145095877	145096262	0.318515	0.992107	1.63913	128400	128593	-	-128593	ENSG00000226592	871	1.34	up	0.577	-10000	down	1	1.24137	4.5716	1.88076
chr7	7602284	7602718	0.254812	1.02217	2.00413	3785	4002	+	4002	MIOS	3453	1.07	up	0.00172	0.15	up	3.91e-05	0.405834	1.50299	1.88888
chr6	15901136	15901655	0.477773	1.20255	1.3317	33358	33617	+	33617	ENSG00000214027	534	-0.36	down	0.00342	0.13	up	1	0.572942	2.12924	1.89388
chr5	158419329	158419851	0.159258	1.38294	3.1183	5122	5383	-	-5383	ENSG00000253456	542	0	no	NA	10000	up	NA	0.859412	3.19386	1.89388
chr2	40895493	40896083	0.573328	1.26268	1.13906	57300	57595	-	-57595	SLC8A1	2965	-2.87	down	1.85e-94	-0.04	down	3.27e-79	0.477451	1.7848	1.90234
chr1	159749312	159749676	0.318515	1.38294	2.1183	1083	1265	+	1265	DUSP23	693	3.14	up	0	2.22	up	0	1.79044	6.70084	1.90403
chr11	9548947	9549626	0.350367	1.83389	2.38797	-246	93	-	-93	ZNF143	1921	0.36	up	9.23e-152	-0.14	down	0.303	0.763922	2.88074	1.91494
chr3	32150780	32151286	0.477773	1.23262	1.36733	2589	2842	-	-2842	GPD1L	621	0.13	up	0.339	0.73	up	0.594	0.429706	1.62824	1.92189
chr2	168994810	168995354	0.222961	1.53326	2.78174	25194	25466	-	-25466	STK39	2214	0.48	up	0.0127	0.61	up	0.000739	0.907158	3.44436	1.92481
chr12	124242062	124242544	0.382219	1.20255	1.65363	35	276	+	276	ATP6V0A2	2454	0.5	up	7.54e-25	0.36	up	0.00401	0.692304	2.63024	1.92571
chr19	42972390	42972840	0.222961	0.871852	1.96729	25190	25415	-	-25415	CXCL17	1172	0	no	NA	0	no	NA	0.572942	2.19186	1.9357
chr3	188186943	188187517	0.41407	1.83389	2.14696	2844	3131	+	3131	LPP	499	0.31	up	1.72e-05	0.8	up	0.224	1.31299	5.04129	1.94093
chr7	99551219	99551658	0.382219	1.17249	1.61711	4976	5195	-	-5195	ENSG00000237640	682	0.7	up	1	10000	up	0.675	0.405834	1.56562	1.94777
chr4	188052918	188053311	0.191109	1.02217	2.41917	69830	70026	+	70026	ENSG00000249747	578	0	no	NA	0	no	NA	0.453579	1.75349	1.95081
chr2	43766884	43767829	0.350367	2.67568	2.93297	614	1086	+	1086	THADA	544	0.94	up	0.887	-0.2	down	0.459	0.93103	3.60092	1.95147
chr13	23923198	23923750	0.254812	1.80383	2.82356	4125	4401	+	4401	SACS	513	0.34	up	7.16e-12	-0.08	down	0.36	1.24137	4.8221	1.95772
chr1	78695138	78695438	0.191109	1.20255	2.65363	-145	5	-	-5	MGC27382	1993	0.1	up	0.427	-10000	down	0.594	0.692304	2.75549	1.99283
chr2	20996110	20996715	0.605179	2.13453	1.81849	4508	4811	+	4811	C2orf43	2526	0.61	up	0.000224	0.27	up	0.00789	1.07427	4.28979	1.99756
chr14	51207591	51207891	0.350367	1.02217	1.5447	1212	1362	+	1362	NIN	920	-0.11	down	0.99	-0.52	down	0.889	0.381961	1.5343	2.00609
chr4	145831710	145832189	0.41407	1.14243	1.46415	9680	9919	+	9919	ENSG00000251452	448	0	no	NA	0	no	NA	0.477451	1.94137	2.02365
chr2	177594526	177595005	0.41407	1.20255	1.53815	5530	5770	-	-5770	LOC375295	532	0	no	NA	0	no	NA	0.143235	0.594935	2.05434
chr2	86151587	86151977	0.254812	1.14243	2.16459	2102	2297	+	2297	#REF!	2612	10000	up	NA	0	no	NA	0.954903	3.97667	2.05813
chr18	52624443	52625108	0.191109	1.62345	3.08659	170	503	+	503	CCDC68	4029	4.53	up	0	2.91	up	0	1.00265	4.19585	2.06515
chr4	74871737	74872242	0.318515	1.11236	1.80419	7242	7494	-	-7494	CXCL5	2538	4.46	up	0.00932	1.3	up	0.0024	0.238726	1.00199	2.06945
chr13	40810115	40810809	0.477773	2.37504	2.31356	15476	15823	-	-15823	FLJ42392	2551	10000	up	NA	0	no	NA	1.43235	6.13722	2.0992
chr15	40120672	40121372	0.41407	3.06651	2.88865	105	455	+	455	GPR176	1755	0.76	up	9.32e-143	0.53	up	1.08e-20	0.620687	2.69286	2.1172
chr1	16521785	16522374	0.222961	1.0823	2.27924	1628	1922	+	1922	ARHGEF19	1312	2.48	up	4.41e-49	1.13	up	6.59e-44	0.525196	2.2858	2.12177
chr9	22342304	22343117	0.382219	2.70575	2.82356	103724	104130	+	104130	DMRTA1	2302	0.98	up	5.02e-37	0.6	up	0.000986	0.525196	2.2858	2.12177
chr8	130293891	130294596	0.509625	1.98421	1.96106	30508	30860	-	-30860	#REF!	172	0	no	NA	0	no	NA	0.358089	1.56562	2.12834
chr6	164211252	164211703	0.605179	1.38294	1.1923	15596	15821	-	-15821	#REF!	1785	0	no	NA	-10000	down	0.594	0.668432	2.94336	2.13861
chr10	101501856	101502475	0.286664	1.7437	2.60472	604	914	+	914	CUTC/ENTPD7	612	0.27	up	0.0472	0.18	up	0.98	0.978775	4.3211	2.14235
chr20	32858001	32858572	0.191109	1.20255	2.65363	852	1138	-	-1138	ASIP	584	2.65	up	0.0894	-10000	down	0.805	0.907158	4.00798	2.14345
chrx	109325260	109325738	0.222961	1.02217	2.19677	999999999	999999999	?	1									0.572942	2.59892	2.18145
chr10	59463425	59463909	0.382219	1.7437	2.18968	190240	190482	-	-190482	#REF!	269	0	no	NA	0	no	NA	0.453579	2.06661	2.18784
chr15	58805865	58806406	0.286664	1.47313	2.36145	14932	15202	-	-15202	#REF!	2215	-0.71	down	1	10000	up	0.435	0.572942	2.63024	2.19873
chr19	6204168	6204649	0.127406	0.78166	2.61711	630	870	+	870	ACSBG2	1955	0	no	0.539	-10000	down	0.594	0.83554	3.88273	2.21629
chr6	141520122	141520727	0.637031	1.71364	1.42763	276074	276376	-	-276376	#REF!	456	1.42	up	1	10000	up	1	0.477451	2.22318	2.2192
chr6	12354579	12355316	0.382219	2.40511	2.65363	34756	35124	-	-35124	#REF!	140	0	no	NA	0	no	NA	0.883285	4.22717	2.25874
chr1	103749524	103750500	0.573328	2.91619	2.34665	67269	67757	+	67757	#REF!	418	0	no	NA	0	no	NA	0.572942	2.75549	2.26585
chr2	190215228	190215709	0.350367	1.29275	1.8835	38200	38441	-	-38441	#REF!	478	0	no	NA	0	no	NA	0.83554	4.03929	2.27332
chr5	175236793	175237401	0.382219	3.27696	3.09989	13048	13352	-	-13352	CPLX2	469	0	no	NA	0	no	NA	0.716177	3.47567	2.2789
chr1	184591345	184591851	0.350367	1.68358	2.26459	182	435	-	-435	#REF!	3052	0.87	up	0.00367	0.33	up	8.99e-18	1.12201	5.51097	2.29622
chr1	100422310	100422688	0.254812	0.841788	1.72402	11135	11324	+	11324	#REF!	1706	0.36	up	0.0326	-0.11	down	0.551	0.692304	3.41305	2.30158
chr1	61914492	61915026	0.382219	1.83389	2.26244	6025	6292	+	6292	NFIA	938	1.71	up	0.000739	2.28	up	2.69e-20	0.501324	2.47368	2.30284
chr3	148299523	148300470	0.382219	1.65351	2.11306	113312	113785	+	113785	#REF!	211	0	no	NA	0	no	NA	0.238726	1.18987	2.31738
chr9	82104185	82104624	0.477773	1.62345	1.76466	16096	16315	+	16315	#REF!	328	0	no	NA	0	no	NA	0.572942	2.88074	2.32998
chr9	71693418	71693855	0.541476	1.38294	1.35277	138	357	+	357	FXN	7176	0.13	up	9.71e-11	-0.05	down	0.882	0.453579	2.2858	2.33327
chr3	171792449	171792777	0.605179	1.05223	0.798022	27746	27910	-	-27910	FNDC3B	3684	-0.48	down	0.6	-0.1	down	0.0146	0.358089	1.81612	2.34247
chr4	124981379	124982192	0.318515	2.07441	2.70326	1422	1828	+	1828	#REF!	526	-10000	down	0.672	-10000	down	0.594	0.859412	4.38373	2.35074
chr1	171096596	171097101	0.509625	1.35287	1.40852	9636	9889	-	-9889	FMO3	2079	5.73	up	1.28e-116	3.3	up	1.05e-35	1.43235	7.42103	2.37323
chr13	49142023	49142521	0.605179	2.13453	1.81849	289	538	-	-538	#REF!	780	10000	up	NA	0	no	0.675	1.09814	5.69885	2.37561
chr7	19361580	19362200	0.477773	2.04434	2.09724	30957	31267	+	31267	#REF!	566	10000	up	NA	10000	up	NA	0.453579	2.37974	2.39138
chr5	66564349	66564751	0.191109	1.83389	3.26244	499	700	-	-700	#REF!	509	0	no	NA	10000	up	1	1.50397	7.92202	2.39709
chr2	238006514	238007144	0.382219	1.50319	1.97556	-289	26	-	-26	COPS8	690	1.44	up	1.52e-48	0.5	up	1.01e-74	1.02652	5.41704	2.39974
chr2	158012442	158013063	0.286664	1.71364	2.57963	53956	54266	+	54266	#REF!	970	0.03	up	0.11	0.22	up	0.311	0.692304	3.69486	2.41604
chr2	121954957	121955535	0.286664	1.47313	2.36145	14801	15090	-	-15090	#REF!	544	0	no	NA	0	no	NA	1.05039	5.63622	2.4238
chr2	222807776	222808279	0.509625	1.35287	1.40852	662	914	+	914	#REF!	390	0	down	0.125	-0.04	down	0.569	0.549069	3.0373	2.46773
chr10	117797748	117798192	0.0955546	1.14243	3.57963	18244	18466	+	18466	GFRA1	9134	1.07	up	3.55e-08	-0.61	down	0.00145	0.429706	2.41105	2.48824
chr17	28004036	28004702	0.605179	2.61555	2.11168	1188	1521	-	-1521	SSH2	1630	0.06	up	0.00396	-0.09	down	0.924	0.596814	3.35042	2.48899
chr6	35658915	35659314	0.445922	1.02217	1.19677	2196	2395	-	-2395	FKBP5	7384	6.14	up	0	4.25	up	0	0.549069	3.13123	2.51167
chr2	129342050	129342551	0.445922	1.38294	1.63287	2900	3150	-	-3150	#REF!	357	0	no	NA	0	no	NA	0.549069	3.13123	2.51167
chr4	184509541	184509851	0.318515	1.56332	2.29518	50938	51093	+	51093	RWDD4	2590	0.73	up	0.694	0.43	up	3.32e-05	0.334216	1.91005	2.51476
chr1	160101798	160102297	0.605179	1.23262	1.02629	1440	1689	-	-1689	ATP1A2	1038	3.07	up	0.00933	10000	up	0.273	0.525196	3.00598	2.51691
chr7	19802346	19802726	0.477773	1.02217	1.09724	392	582	-	-582	#REF!	1953	0	no	0.539	0	no	NA	0.310343	1.7848	2.52383
chr9	89605117	89605633	0.318515	1.20255	1.91667	11315	11573	+	11573	LOC100506834/LOC100509164	4387	1.7	up	0.95	2.26	up	5.42e-13	0.453579	2.72417	2.58639
chr6	129455024	129455376	0.382219	1.50319	1.97556	23298	23474	+	23474	ENSG00000219642	1594	0.23	up	0.247	0.2	up	0.988	0.859412	5.16654	2.58777
chr9	92171359	92171917	0.350367	1.47313	2.07194	48010	48289	+	48289	GADD45G	1066	-0.63	down	2.78e-81	0.34	up	0.828	0.429706	2.63024	2.61377
chr12	87641476	87642114	0.254812	1.77377	2.79931	77271	77590	-	-77590	#REF!	444	0	no	NA	0	no	NA	0.429706	2.72417	2.6644
chr13	98433951	98434426	0.318515	1.0823	1.76466	103734	103971	-	-103971	#REF!	692	0	no	NA	0	no	NA	0.214853	1.40906	2.71331
chr15	99048826	99049454	0.286664	1.98421	2.79114	8157	8471	+	8471	FAM169B	3298	10000	up	NA	10000	up	1	0.501324	3.31911	2.72698
chr8	27271068	27271799	0.605179	1.44306	1.2537	5718	6084	+	6084	PTK2B	554	5.22	up	9.02e-81	3.88	up	1.28e-148	0.787795	5.3231	2.75637
chr8	23997202	23997976	0.477773	2.25479	2.23859	29494	29881	+	29881	#REF!	491	10000	up	0.139	-0.95	down	0.736	0.716177	4.85341	2.76061
chr2	67890790	67891476	0.382219	1.98421	2.3761	19733	20076	+	20076	ENSG00000235495	167	0	no	NA	0	no	NA	0.286471	1.97268	2.7837
chr13	30699897	30700201	0.445922	1.65351	1.89067	16885	17037	-	-17037	#REF!	480	10000	up	NA	10000	up	NA	0.525196	3.75748	2.83884
chr11	114033418	114034066	0.477773	1.98421	2.05417	66110	66434	-	-66434	ZBTB16	2099	0	no	0.539	-10000	down	0.594	1.2175	8.92402	2.87377
chr3	188358801	188359201	0.41407	0.992107	1.26062	31407	31607	-	-31607	LPP	582	0.46	up	2.43e-11	0.31	up	0.805	0.286471	2.12924	2.89388
chr5	40991228	40991912	0.350367	1.89402	2.43451	6207	6549	+	6549	HEATR7B2	600	0	no	NA	0	no	NA	0.74005	5.54228	2.90479
chr1	119644212	119644512	0.350367	0.901915	1.36413	15635	15785	-	-15785	#REF!	1047	0.2	up	0.475	0.7	up	0.792	0.787795	5.98066	2.92441
chr1	61784061	61784626	0.222961	1.413	2.6639	13528	13811	+	13811	NFIA	1451	2.06	up	1.86e-11	1.98	up	1.17e-29	0.572942	4.41504	2.94597
chr9	98918541	98918876	0.477773	1.11236	1.21923	8400	8567	-	-8567	#REF!	1835	0.04	up	5.43e-30	-0.09	down	0.944	0.214853	1.65955	2.94937
chr18	41443076	41443601	0.573328	1.17249	1.03214	363274	363537	-	-363537	#REF!	664	0	no	NA	0	no	NA	0.310343	2.75549	3.15037
chr8	27797339	27797815	0.445922	1.23262	1.46686	17618	17856	-	-17856	SCARA5	555	0.68	up	0.206	0.83	up	0.736	0.429706	4.13323	3.26585
chr11	114037505	114037926	0.286664	1.32281	2.20617	70198	70408	-	-70408	ZBTB16	2099	0	no	0.539	-10000	down	0.594	0.763922	7.38971	3.27402
chr8	78221311	78221951	0.350367	2.01428	2.52332	89357	89677	+	89677	#REF!	686	3.91	up	1.35e-05	0.91	up	0.277	0.286471	2.81811	3.29827
chr5	90312801	90313504	0.732586	1.29275	0.819369	13304	13655	+	13655	#REF!	318	10000	up	NA	0	no	NA	0.334216	3.31911	3.31194
chr7	139553295	139554426	0.477773	4.08868	3.09724	4120	4686	+	4686	TBXAS1	386	1.63	up	0.427	0.12	up	1	0.525196	5.26047	3.32426
chr5	157542462	157543416	0.637031	3.03645	2.25295	36690	37167	-	-37167	ENSG00000253422	666	-2.94	down	0.195	-10000	down	0.289	0.453579	4.5716	3.33327
chr11	114034488	114035136	0.445922	2.25479	2.33813	67180	67504	-	-67504	ZBTB16	2099	0	no	0.539	-10000	down	0.594	1.00265	10.4583	3.38276
chr20	35572541	35573095	0.286664	1.53326	2.41917	6980	7257	+	7257	SAMHD1	2121	2.98	up	0	0.69	up	1.02e-171	0.238726	2.5363	3.4093
chr20	35571802	35572201	0.127406	1.17249	3.20207	7874	8073	+	8073	SAMHD1	2121	2.98	up	0	0.69	up	1.02e-171	0.286471	3.13123	3.45027
chr7	36684303	36685134	0.541476	1.95415	1.85157	6818	7233	-	-7233	AOAH	678	0	no	NA	0	no	NA	0.238726	2.7868	3.54518
chr5	41193660	41194341	0.445922	2.28485	2.35724	3488	3828	+	3828	C6	635	10000	up	0.539	0	no	1	0.501324	5.91803	3.5613
chr7	95179169	95179640	0.41407	1.14243	1.46415	5314	5550	-	-5550	LOC100506064	2398	0	no	NA	0	no	NA	0.262598	3.09992	3.5613
chr4	52830131	52830656	0.541476	1.47313	1.44391	13588	13851	+	13851	#REF!	294	0	no	0.539	0	no	NA	0.190981	2.31711	3.60083
chr11	114030457	114031333	0.191109	4.29913	4.49158	63149	63587	-	-63587	ZBTB16	2099	0	no	0.539	-10000	down	0.594	0.620687	7.54627	3.60383
chr5	66544446	66545136	0.318515	2.13453	2.74449	18714	19059	+	19059	ENSG00000251206	509	0	no	NA	10000	up	1	0.358089	4.44635	3.63423
chr11	114068476	114069309	0.41407	2.88613	2.80119	52044	52460	+	52460	ZBTB16	2477	10000	up	0	10000	up	7.14e-178	0.286471	5.44835	4.24936
chr4	148140284	148140765	0.573328	1.11236	0.956195	10464	10704	+	10704	AK057895	2515	0	no	NA	0	no	NA	0.0954903	1.87874	4.29827
chrx	14033315	14033817	0.286664	1.0823	1.91667	999999999	999999999	?	1									0.167108	3.31911	4.31194
chr1	247110610	247111077	0.41407	0.962043	1.21623	1630	1864	-	-1864	ZNF695	504	-0.6	down	0.488	-0.21	down	0.539	0.167108	3.63223	4.442
chr19	17067967	17068704	0.573328	1.53326	1.41917	53560	53928	-	-53928	CPAMD8	2444	5.28	up	0	-0.39	down	0.0208	0.119363	2.66155	4.47884
chr2	21261576	21262238	0.382219	1.95415	2.35407	4189	4520	+	4520	APOB	13509	10000	up	0	8.19	up	1.72e-242	0.143235	3.31911	4.53434
chr4	83522661	83523328	0.668883	2.826	2.07894	10938	11272	+	11272	#REF!	910	0	no	NA	0	no	NA	0.0954903	2.91205	4.93054
chr14	104515439	104515959	0.509625	1.38294	1.44023	-204	56	+	56	TDRD9	948	-0.19	down	0.921	0.3	up	0.0723	0.0477451	1.72218	5.17274
chr1	62103795	62104519	0.445922	2.67568	2.58504	15302	15664	+	15664	#REF!	754	0.91	up	0.228	-0.07	down	0.594	0.119363	5.51097	5.52888
chr11	114024987	114025708	0.382219	3.42728	3.16459	57680	58040	-	-58040	ZBTB16	2099	0	no	0.539	-10000	down	0.594	0.214853	9.98864	5.53887
chr11	114049741	114050646	0.541476	7.54603	3.80075	70706	71158	+	71158	ZBTB16	2477	10000	up	0	10000	up	7.14e-178	0.0716177	8.23515	6.84533
chrx	147446722	147447042	0.0637031	0.661405	3.3761	999999999	999999999	?	1									0	2.50499	INF

## Sheet: PLZF peaks (H3K27Ac unchanged)
PLZF Peak position						Mapped nearest transcript						Expression from RNA seq						Histone mark by ChIP-seq
												Expression during Osteogenic commitment			Expression changes after PLZF knock down
Chromosome	Start	End	PLZF_d0	PLZF_d10	log2(PLZF_d10/d0)	BorderDist:From Peak_PLZF_d10 to nearest transcript	CenterDist:From Peak_PLZF_d10 to nearest transcript	Direction to nearest transcript	Rel. position of nearest transcript	Symbol	Transcript length	log2FC(10d/d0)	Regulation(10d/d0)	adj. p-value(10d/d0)	log2FC(PLZFkd d2/d0)	Regulation(PLZFkd d2/d0)	adj. p-value (PLZFkd d2/d0)	K27Ac_d0 (naive)	K27Ac_d10	log2(K27Ac_d10/d0)
chr1	202558457	202558776	0.382219	1.413	1.88629	760	919	-	-919	PPP1R12B	10989	-0.11	down	0.483	-0.04	down	0.926	5.87265	2.94336	-0.996548
chr11	31849076	31849501	0.350367	0.931979	1.41143	9566	9779	-	-9779	PAX6	3597	1.1	up	0.639	0.35	up	1	0.310343	0.156562	-0.987134
chr6	44025940	44026709	0.477773	3.12664	2.71022	14942	15326	+	15326	ENSG00000231881	1609	-2.06	down	0.353	-1.61	down	0.511	8.18829	4.13323	-0.986293
chr7	47331044	47331576	0.477773	2.826	2.56436	10250	10516	+	10516	TNS3	3764	2.09	up	0	1.23	up	2.09e-100	4.4403	2.25449	-0.977856
chr10	105032732	105033525	0.254812	1.86396	2.87086	3396	3792	+	3792	INA	3231	-1.1	down	2.13e-09	0.21	up	0.665	1.52784	0.782809	-0.964766
chr7	100760632	100761166	0.191109	1.38294	2.85527	9213	9480	+	9480	SERPINE1	3136	-1.54	down	5.62e-205	-0.46	down	0.00017	5.9204	3.0373	-0.962906
chr9	26265115	26265527	0.254812	1.05223	2.04595	146709	146915	-	-146915	LOC100509461	1679	0	no	NA	0	no	NA	2.74535	1.40906	-0.962259
chr9	38025745	38026522	0.286664	2.13453	2.89649	5428	5817	-	-5817	SHB/CKAP2	2169	-1.1	down	4.62e-13	-0.12	down	0.752	4.98937	2.56761	-0.958429
chr3	197093957	197094617	0.254812	1.65351	2.69803	63339	63669	-	-63669	LOC100507086	1699	-0.74	down	0.228	-0.96	down	0.335	3.70025	1.94137	-0.93055
chr2	173860407	173861000	0.254812	1.71364	2.74956	4754	5051	-	-5051	RAPGEF4	1075	-1.67	down	0.191	1.96	up	0.674	2.24402	1.18987	-0.915284
chr1	206674725	206675256	0.222961	1.14243	2.35724	3664	3929	-	-3929	C1orf147	2096	-0.43	down	0.754	0.14	up	1	3.24667	1.72218	-0.914725
chr16	55070012	55070351	0.477773	1.29275	1.43604	96216	96386	-	-96386	LOC100132339	1129	-10000	down	0.38	-0.53	down	1	3.41378	1.81612	-0.910513
chr6	135230157	135230727	0.318515	1.11236	1.80419	7801	8086	+	8086	ALDH8A1	2408	-0.23	down	1	-2	down	0.152	4.36868	2.34843	-0.895503
chrx	16856261	16856761	0.159258	1.59338	3.32266	999999999	999999999	?	1									1.45623	0.782809	-0.895503
chr7	55392971	55393711	0.637031	3.60766	2.50163	16298	16668	+	16668	ENSG00000230936	2643	-10000	down	0.215	0.35	up	1	0.93103	0.500997	-0.894024
chrx	21950633	21951101	0.191109	1.05223	2.46099	999999999	999999999	?	1									1.09814	0.594935	-0.884257
chr18	61455578	61456147	0.350367	1.83389	2.38797	7400	7684	+	7684	SERPINB7	587	0	up	0.977	-0.65	down	0.438	2.36338	1.28381	-0.880427
chr6	42489712	42490224	0.318515	1.413	2.14933	21952	22208	-	-22208	ENSG00000237107	313	0	no	NA	0	no	NA	3.2228	1.75349	-0.878083
chr21	27879239	27879753	0.477773	1.413	1.56436	11159	11416	+	11416	ENSG00000197934	422	-10000	down	0.639	0	no	NA	1.26525	0.688872	-0.877111
chr9	116382713	116383221	0.477773	1.32281	1.46921	1205	1459	-	-1459	ENSG00000233817	3043	-2.53	down	0.0357	-0.27	down	0.939	9.02383	4.91604	-0.876244
chr14	92977886	92978614	0.445922	3.33709	2.90373	1511	1875	+	1875	RIN3	2864	-0.77	down	4.53e-19	-0.36	down	0.00187	3.96285	2.16055	-0.875137
chr11	6354377	6354776	0.573328	0.901915	0.653632	12500	12699	-	-12699	PRKCDBP	1174	-0.01	down	0.954	0.18	up	0.0801	1.43235	0.782809	-0.871657
chr21	48019011	48019569	0.732586	1.26268	0.785422	-183	96	-	-96	S100B	839	-2.94	down	2.84e-08	-1.47	down	0.119	1.71882	0.93937	-0.871657
chr1	203527352	203527976	0.573328	1.83389	1.67748	49275	49587	-	-49587	OPTC	1444	10000	up	1	-0.9	down	0.799	5.6578	3.09992	-0.868009
chrx	151152653	151153248	0.286664	1.29275	2.17301	999999999	999999999	?	1									1.31299	0.720184	-0.86642
chr13	28903867	28904276	0.382219	1.413	1.88629	29384	29589	-	-29589	FLT1	7123	-0.32	down	0.0557	0.8	up	2.47e-10	3.36603	1.84743	-0.865531
chr8	134587933	134588351	0.350367	1.62345	2.21212	1834	2043	-	-2043	LOC100129104	1851	-0.2	down	0.639	0.34	up	0.752	2.05304	1.12724	-0.864962
chr11	6240426	6240926	0.318515	1.0823	1.76466	180	430	-	-430	FAM160A2	652	-0.04	down	1	0.1	up	0.809	1.86206	1.03331	-0.84963
chr20	36904151	36904678	0.222961	1.71364	2.9422	12056	12319	+	12319	ENSG00000206249	806	0	no	NA	-0.11	down	1	1.90981	1.06462	-0.843088
chr20	49596645	49597131	0.445922	1.14243	1.35724	18776	19019	+	19019	ENSG00000232358	802	-0.56	down	0.239	-1.21	down	0.00014	3.79574	2.12924	-0.834042
chr7	22757710	22758251	0.254812	1.98421	2.96106	6764	7034	+	7034	LOC541472	1360	-3.05	down	3.62e-11	-0.88	down	0.0167	4.7029	2.66155	-0.821283
chr22	30601351	30602154	0.254812	1.98421	2.96106	944	1346	+	1346	ENSG00000225676	298	0	no	NA	0	no	NA	5.34746	3.0373	-0.816064
chr5	61708218	61708593	0.382219	0.751596	0.97556	-106	82	+	82	KIF2A	530	-0.05	down	0.812	0.18	up	0.904	2.6976	1.5343	-0.814091
chr3	123407195	123407674	0.605179	1.11236	0.878192	818	1057	+	1057	ENSG00000250174	500	-1.31	down	0.312	-0.55	down	1	7.25726	4.13323	-0.812156
chr5	53598053	53598511	0.668883	1.38294	1.04791	7734	7963	+	7963	ARL15	739	-0.61	down	0.0557	-0.16	down	0.961	0.549069	0.313123	-0.810256
chr18	39618856	39619458	0.318515	2.43517	2.93459	1142	1443	-	-1443	PIK3C3	2073	-0.14	down	0.702	0.1	up	0.826	1.4801	0.845433	-0.807931
chr8	109437730	109438514	0.286664	1.92409	2.74674	9048	9440	+	9440	EIF3E	715	0	no	NA	0	no	NA	0.93103	0.53231	-0.806562
chr9	102827047	102827599	0.159258	1.47313	3.20945	3953	4229	-	-4229	ERP44	1426	-0.22	down	0.0043	-0.07	down	0.752	0.381961	0.219186	-0.801267
chr11	66103995	66104578	0.637031	1.413	1.14933	-266	25	+	25	RIN1	2122	-0.5	down	1.88e-08	-0.44	down	4.86e-05	7.90182	4.54029	-0.799401
chr3	171069337	171069753	0.254812	0.992107	1.96106	4614	4822	-	-4822	TNIK	753	-3.31	down	0.051	0.11	up	1	0.596814	0.344436	-0.793047
chr6	159605568	159606101	0.350367	2.40511	2.77916	2152	2418	+	2418	FNDC1	5355	-2.79	down	0	-0.66	down	3.37e-21	4.87	2.81811	-0.789195
chr8	118893774	118894201	0.318515	1.44306	2.1797	44038	44251	-	-44251	EXT1	841	-1.07	down	4.9e-65	-0.55	down	1.37e-10	1.62333	0.93937	-0.789195
chr12	19924737	19925229	0.318515	1.44306	2.1797	242390	242636	+	242636	LOC100506393/LOC100509052	526	10000	up	0.663	0	no	NA	2.86471	1.65955	-0.787592
chr7	22600884	22601336	0.350367	0.992107	1.50163	1620	1846	+	1846	LOC100506178/LOC100507876	2432	-3.11	down	3.53e-15	-1.49	down	0.000596	3.98672	2.31711	-0.782873
chr8	32729246	32729923	0.445922	2.01428	2.1754	103770	104109	-	-104109	LOC100507358/LOC100508468	2415	-4.23	down	3.23e-199	-2.66	down	5e-200	1.50397	0.876746	-0.778547
chr5	139493228	139493814	0.191109	1.32281	2.79114	-106	187	+	187	PURA	2614	0.01	up	0.954	-0.14	down	0.388	9.59677	5.63622	-0.767821
chr14	45431069	45431501	0.637031	1.20255	0.916666	-110	106	-	-106	KLHL28	6551	0.45	up	0.000913	0.04	up	0.925	5.10873	3.00598	-0.765127
chr10	103769433	103770011	0.477773	2.52536	2.40209	7612	7901	-	-7901	C10orf76	2877	0.09	up	0.399	0	up	1	0.954903	0.563622	-0.760625
chr9	18238201	18238726	0.191109	1.50319	2.97556	121868	122131	+	122131	ENSG00000227167	237	0	no	NA	0	no	NA	1.2175	0.720184	-0.757486
chr1	210612376	210612894	0.477773	1.38294	1.53334	33	292	+	292	HHAT	2714	-0.74	down	1.16e-07	-0.82	down	3.66e-08	5.44295	3.25648	-0.741073
chr7	34172919	34173340	0.732586	1.32281	0.852536	9632	9842	+	9842	BMPER	538	-2.05	down	1.25e-32	-0.91	down	2.15e-05	2.24402	1.34643	-0.736946
chr1	211210298	211211070	0.41407	2.28485	2.46415	94860	95246	+	95246	ENSG00000234233	626	0.25	up	0.759	-1.59	down	0.38	3.17505	1.91005	-0.733167
chr9	103190111	103190551	0.41407	0.901915	1.12312	392	612	-	-612	TMEFF1	710	-0.32	down	0.00338	-0.28	down	0.0168	9.85937	5.94935	-0.728765
chr21	16367758	16368355	0.509625	2.34498	2.20207	2582	2881	-	-2881	ENSG00000231201	824	0	no	NA	0	no	NA	1.81432	1.09593	-0.727267
chr3	177169680	177170207	0.445922	1.14243	1.35724	9928	10192	-	-10192	LOC100505566/LOC100508527	542	10000	up	0.663	0.41	up	1	2.93633	1.7848	-0.718247
chr11	47884643	47885384	0.254812	2.76587	3.44023	14536	14907	-	-14907	NUP160	1537	0.01	up	1	0.1	up	0.799	0.978775	0.594935	-0.718247
chr2	33294795	33295676	0.318515	2.85607	3.16459	6616	7056	-	-7056	ENSG00000223951	259	0	no	NA	0	no	NA	3.74799	2.2858	-0.713418
chr4	17068642	17069046	0.382219	1.53326	2.00413	4854	5056	-	-5056	ENSG00000251212	288	0	no	NA	0	no	NA	4.29706	2.63024	-0.708158
chr5	96869951	96870326	0.382219	0.992107	1.3761	29550	29738	-	-29738	ENSG00000250331	724	-0.42	down	1	-1.07	down	1	1.43235	0.876746	-0.708158
chr6	158439963	158440494	0.350367	1.413	2.01182	1466	1731	-	-1731	SYNJ2	2147	-1.85	down	1.69e-165	-0.88	down	5.72e-20	2.91245	1.7848	-0.70647
chr9	116383688	116384140	0.127406	1.38294	3.44023	774	1000	+	1000	ENSG00000233817	3043	-2.53	down	0.0357	-0.27	down	0.939	7.4005	4.54029	-0.704838
chr15	62898433	62899100	0.127406	2.67568	4.3924	16548	16881	-	-16881	TLN2	7739	-0.77	down	6.58e-21	-0.24	down	0.0681	4.63128	2.84942	-0.70074
chr1	49344062	49344590	0.445922	2.25479	2.33813	60883	61147	-	-61147	AGBL4	1454	10000	up	1	-10000	down	0.4	1.62333	1.00199	-0.696085
chr11	38482419	38482944	0.191109	1.83389	3.26244	37600	37863	+	37863	ENSG00000255477	510	0	no	NA	0	no	NA	2.84084	1.75349	-0.696085
chr9	114803837	114804653	0.445922	2.826	2.6639	-344	64	-	-64	SUSD1	1434	-0.02	down	1	0.05	up	0.897	5.9204	3.66354	-0.692454
chr6	106043990	106044576	0.254812	1.71364	2.74956	15966	16259	+	16259	ENSG00000237567	589	0	no	NA	0	no	NA	0.859412	0.53231	-0.691084
chr6	16761249	16761746	0.127406	0.962043	2.91667	-120	129	-	-129	ENSG00000229931	491	-1.24	down	0.0961	-0.63	down	0.251	10.3129	6.38772	-0.691084
chr8	37679735	37680121	0.350367	1.23262	1.81479	6249	6442	+	6442	GPR124	3670	-0.45	down	1.23e-08	-0.24	down	0.0345	4.79839	2.97467	-0.689818
chr9	735145	735539	0.605179	1.98421	1.71313	399	596	-	-596	KANK1	2268	0.11	up	0.306	0.4	up	3.52e-05	1.31299	0.814121	-0.689542
chr1	92116174	92116742	0.477773	1.17249	1.29518	6541	6825	-	-6825	HSP90B3P	1561	-0.03	down	0.974	-0.28	down	0.00215	5.44295	3.38173	-0.686625
chr11	123300583	123301006	0.127406	1.53326	3.58909	52	264	+	264	LOC100128242	1094	-0.39	down	0.185	0.41	up	0.186	8.71349	5.41704	-0.685747
chr5	159509991	159510501	0.350367	1.71364	2.29012	5051	5306	-	-5306	PWWP2A	1819	-0.28	down	0.0938	-0.36	down	0.0352	1.95755	1.22118	-0.680772
chr20	46196635	46197233	0.127406	2.01428	3.98276	14694	14993	+	14993	NCOA3	7746	1.37	up	3.11e-127	1.2	up	7.45e-55	1.00265	0.626247	-0.679012
chr18	2515248	2515764	0.254812	1.0823	2.08659	1485	1743	+	1743	AK025194	1948	-10000	down	0.639	-0.61	down	1	3.05569	1.91005	-0.677885
chr11	100747463	100747929	0.41407	1.32281	1.67566	16825	17058	-	-17058	ARHGAP42	489	-1.15	down	0.374	-1.01	down	0.725	3.24667	2.0353	-0.673717
chr10	14456799	14457301	0.445922	1.68358	1.91667	46792	47043	+	47043	FRMD4A	1149	-1.09	down	0.627	-2.32	down	0.401	3.48539	2.19186	-0.669164
chr5	155547970	155548583	0.222961	1.65351	2.89067	2284	2590	+	2590	SGCD	2850	0.06	up	0.902	0.52	up	0.00235	2.33951	1.47168	-0.668743
chr6	30749448	30750076	0.286664	1.47313	2.36145	-287	27	-	-27	AB023051,1	1176	-0.43	down	1	-1.38	down	0.137	5.37133	3.38173	-0.667516
chr14	55443109	55443625	0.286664	1.38294	2.2703	9791	10049	-	-10049	WDHD1	2740	0.53	up	0.000825	-0.27	down	0.229	1.24137	0.782809	-0.665206
chr6	152467386	152468058	0.541476	2.70575	2.32106	840	1176	+	1176	SYNE1	7780	0.2	up	0.0192	-0.07	down	0.553	1.24137	0.782809	-0.665206
chr8	118681923	118682301	0.286664	1.38294	2.2703	124428	124617	+	124617	EXT1	8270	-1.07	down	5.29e-98	-0.62	down	9.39e-20	2.48275	1.56562	-0.665206
chr4	71553886	71554288	0.541476	0.992107	0.873598	-92	109	+	109	UTP3	2072	0.34	up	0.000104	0.15	up	0.206	6.30236	4.00798	-0.653016
chr3	146521401	146521917	0.318515	1.59338	2.32266	105555	105813	+	105813	ENSG00000243620	570	0	no	NA	0	no	NA	2.45887	1.56562	-0.651267
chr9	103191456	103192140	0.191109	2.79594	3.87086	-340	2	-	-2	TMEFF1	1778	-0.3	down	0.000369	-0.28	down	0.00343	4.1777	2.66155	-0.650442
chr4	11132131	11132614	0.477773	1.80383	1.91667	240986	241227	+	241227	ENSG00000250896	918	0.11	up	0.653	-0.01	down	0.876	0.83554	0.53231	-0.650442
chr15	86166935	86167401	0.286664	1.98421	2.79114	3612	3845	-	-3845	AKAP13	5793	0.49	up	1.1e-10	0.2	up	0.118	2.55436	1.62824	-0.64965
chr7	42419961	42420503	0.477773	1.38294	1.53334	142492	142763	-	-142763	GLI3	583	0.53	up	0.351	-0.46	down	0.42	2.98407	1.91005	-0.643669
chr21	30502460	30502933	0.41407	1.32281	1.67566	-126	110	+	110	C21orf7	1904	-3.19	down	9.23e-97	-2.9	down	2.58e-171	3.03182	1.94137	-0.643111
chr3	148897706	148898282	0.445922	1.65351	1.89067	-214	74	-	-74	CP	2269	-0.25	down	0.523	-0.08	down	0.812	3.2228	2.06661	-0.641044
chr1	200384823	200385655	0.382219	3.1567	3.04595	5639	6055	-	-6055	ZNF281	3132	-1	down	1.24e-35	0.28	up	0.0151	2.38726	1.5343	-0.637769
chr11	85885006	85885926	0.382219	5.92258	3.95376	17903	18363	+	18363	ENSG00000254699	178	0	no	NA	0	no	NA	3.74799	2.41105	-0.636456
chr7	100765333	100765633	0.222961	1.38294	2.63287	4746	4896	+	4896	SERPINE1	3136	-1.54	down	5.62e-205	-0.46	down	0.00017	7.37662	4.75948	-0.632158
chr2	112419965	112420390	0.41407	1.77377	2.09887	12212	12425	+	12425	ENSG00000237583	318	0	no	NA	0	no	NA	3.62863	2.34843	-0.627731
chr2	113450151	113450575	0.445922	1.02217	1.19677	27416	27628	+	27628	NT5DC4	1827	-1.12	down	0.166	1.2	up	0.549	3.77187	2.44236	-0.627001
chr2	46294868	46295286	0.286664	1.89402	2.72402	5290	5499	+	5499	PRKCE	979	-0.87	down	0.139	-1.24	down	0.05	2.93633	1.91005	-0.620399
chr2	218723163	218723645	0.191109	1.32281	2.79114	-193	48	-	-48	TNS1	758	-0.14	down	0.262	0.38	up	0.00387	5.37133	3.50698	-0.615049
chr21	28962551	28963029	0.350367	1.0823	1.62716	47983	48222	+	48222	ENSG00000234052	468	0	no	NA	0	no	NA	2.57824	1.69087	-0.608622
chr18	11178937	11179442	0.477773	1.44306	1.59474	30176	30429	-	-30429	FAM38B	9713	-1.4	down	9.24e-53	0.63	up	3.09e-14	3.67638	2.41105	-0.608622
chr16	78218230	78218912	0.318515	3.2469	3.34963	20044	20385	-	-20385	WWOX	516	-0.25	down	0.56	-1.05	down	0.0444	0.954903	0.626247	-0.608622
chr6	115934671	115935126	0.286664	1.32281	2.20617	19580	19808	+	19808	ENSG00000228777	283	0	no	NA	0	no	NA	0.716177	0.469685	-0.608622
chr5	149897122	149897422	0.127406	0.841788	2.72402	3003	3153	+	3153	NDST1	3590	-1.15	down	5.63e-192	-0.52	down	2.81e-13	4.05834	2.66155	-0.608622
chr19	16389929	16390432	0.127406	2.22472	4.12612	43682	43933	-	-43933	AP1M1	2547	0.39	up	6.3e-10	0.45	up	1.43e-09	0.859412	0.563622	-0.608622
chr11	40350680	40351158	0.41407	1.80383	2.12312	35016	35255	-	-35255	LRRC4C	4054	-2.26	down	0.00112	-2.13	down	4.07e-06	1.43235	0.93937	-0.608622
chr10	1008800	1009199	0.318515	0.992107	1.63913	7886	8086	+	8086	LOC100288619	1886	10000	up	0.416	0.17	up	1	0.238726	0.156562	-0.608622
chr11	6353164	6353795	0.41407	2.73581	2.72402	11288	11603	-	-11603	PRKCDBP	1174	-0.01	down	0.954	0.18	up	0.0801	1.14588	0.751496	-0.608622
chr18	6741203	6741701	0.318515	1.38294	2.1183	11342	11591	-	-11591	LOC100508177/LOC100510425	491	-1.44	down	0.759	-10000	down	0.673	2.93633	1.94137	-0.59694
chr17	76338915	76339590	0.477773	1.95415	2.03214	13270	13607	+	13607	SOCS3	2734	0.1	up	0.46	-0.25	down	0.0135	8.99996	5.98066	-0.589614
chr4	88926185	88926826	0.509625	1.47313	1.53138	1972	2293	+	2293	PKD2	5079	-0.28	down	1.39e-05	0.22	up	0.00965	3.36603	2.25449	-0.578249
chr9	16335801	16336292	0.191109	1.26268	2.72402	59490	59735	-	-59735	Em:AL513424,1	379	0	no	NA	0	no	NA	3.2228	2.16055	-0.576913
chr10	112170053	112170546	0.222961	1.35287	2.60116	18052	18298	+	18298	ENSG00000235874	497	10000	up	0.086	-10000	down	0.673	6.85143	4.60291	-0.573857
chr4	157298433	157298790	0.350367	1.20255	1.77916	208340	208519	+	208519	ENSG00000251511	993	0	no	NA	0	no	NA	3.62863	2.44236	-0.571148
chr4	28289253	28289820	0.286664	1.53326	2.41917	74082	74365	+	74365	ENSG00000250038	726	-5.07	down	6.05e-07	-1.49	down	0.128	2.64986	1.7848	-0.570148
chr6	118709446	118709951	0.41407	1.44306	1.80119	63682	63934	+	63934	ENSG00000216809	2524	-0.13	down	1	-0.16	down	0.947	2.60211	1.75349	-0.569452
chr11	27255555	27256183	0.318515	1.38294	2.1183	13906	14220	-	-14220	ENSG00000254560	745	-3.14	down	0.0304	-3.55	down	0.106	3.3899	2.2858	-0.568545
chr8	67041915	67042965	0.254812	3.33709	3.71108	2457	2982	-	-2982	TRIM55	1925	-10000	down	0.639	10000	up	0.53	1.62333	1.09593	-0.566802
chr11	64622300	64622851	0.254812	1.14243	2.16459	-266	9	-	-9	EHD1	648	-0.18	down	0.0535	0.39	up	2.92e-05	9.26256	6.26247	-0.564679
chr18	2516131	2516649	0.350367	1.35287	1.94909	600	859	+	859	AK025194	1948	-10000	down	0.639	-0.61	down	1	2.91245	1.97268	-0.56208
chr6	168256409	168256851	0.41407	1.29275	1.64249	7602	7823	+	7823	MLLT4	4788	0.05	up	0.778	-0.16	down	0.38	1.24137	0.845433	-0.554174
chr9	13705900	13706452	0.668883	1.62345	1.27924	218390	218666	-	-218666	LOC100506304	477	0	no	NA	0	no	NA	1.24137	0.845433	-0.554174
chr5	176884562	176885041	0.541476	0.901915	0.736094	128	368	-	-368	DBN1	2063	-0.59	down	7.47e-32	-0.07	down	0.585	0.596814	0.40706	-0.552039
chr16	55533954	55534254	0.350367	1.0823	1.62716	3428	3578	-	-3578	MMP2	961	-2.32	down	0	-0.86	down	1.01e-27	5.03711	3.44436	-0.548362
chr16	27248929	27249451	0.222961	1.50319	2.75317	4515	4776	-	-4776	NSMCE1	459	-0.14	down	0.562	0.09	up	0.729	5.53844	3.78879	-0.54774
chr15	26128856	26129486	0.41407	3.63773	3.13509	18021	18336	+	18336	LOC100128714	1967	0	no	NA	0	no	NA	5.44295	3.72617	-0.546695
chr11	86195115	86195726	0.509625	3.75798	2.88245	2726	3031	+	3031	ME3	944	0	up	0.971	0.05	up	0.876	3.79574	2.59892	-0.546466
chr18	12282439	12282827	0.605179	0.901915	0.575629	-89	105	+	105	AK127815	3313	-10000	down	0.0346	-1.88	down	0.511	5.29971	3.63223	-0.545057
chr17	39113185	39113495	0.222961	1.413	2.6639	1174	1329	+	1329	KRT39	1696	10000	up	1	0	no	NA	5.01324	3.44436	-0.541508
chr12	124155313	124155728	0.668883	0.931979	0.478545	-68	140	+	140	TCTN2	2513	-0.32	down	0.00506	-0.15	down	0.446	3.31829	2.2858	-0.537739
chr4	54948311	54948726	0.477773	1.59338	1.7377	4368	4575	+	4575	MORF4LP4	858	10000	up	0.663	-10000	down	0.4	3.2228	2.22318	-0.535691
chr1	39967193	39967708	0.222961	1.53326	2.78174	9874	10132	-	-10132	BMP8A	5626	-0.26	down	0.59	0.06	up	1	0.453579	0.313123	-0.534622
chr17	62675787	62676326	0.254812	1.71364	2.74956	17400	17670	-	-17670	SMURF2	3866	-1.56	down	4.24e-195	-0.7	down	1.09e-24	3.58089	2.47368	-0.53366
chr1	110363868	110364201	0.382219	1.17249	1.61711	6776	6943	+	6943	ENSG00000228420	476	0	no	NA	10000	up	1	6.25461	4.3211	-0.533521
chr12	127153135	127153526	0.350367	2.1646	2.62716	57582	57778	+	57778	LOC100507206/LOC100507741	2513	0.09	up	1	-0.09	down	1	4.20157	2.91205	-0.528895
chr12	50640789	50641357	0.159258	1.53326	3.26716	1177	1461	+	1461	LIMA1	1861	-0.65	down	5.95e-26	-0.33	down	2.65e-05	3.46152	2.41105	-0.521745
chr12	2272291	2273083	0.159258	2.1646	3.76466	42428	42824	-	-42824	CACNA1C	981	-0.44	down	0.172	0.45	up	0.166	3.46152	2.41105	-0.521745
chr18	42117384	42117972	0.222961	1.77377	2.99195	142166	142460	+	142460	SETBP1	1785	0.85	up	0.167	0.33	up	0.438	1.12201	0.782809	-0.519355
chr22	40357306	40357795	0.222961	1.26268	2.50163	904	1149	-	-1149	LOC100506525	1322	0.19	up	1	-0.04	down	1	1.12201	0.782809	-0.519355
chr11	71010398	71010851	0.127406	1.44306	3.50163	11532	11758	-	-11758	LOC100133306	3658	0	no	NA	0	no	NA	4.79839	3.35042	-0.518207
chr15	83956327	83956931	0.159258	1.7437	3.45272	2859	3161	-	-3161	BNC1	4612	-0.28	down	0.016	-0.3	down	0.0548	3.31829	2.31711	-0.51811
chr1	10458536	10458995	0.637031	0.962043	0.594738	-112	117	-	-117	PGD	807	-0.69	down	1.03e-17	-0.33	down	0.00568	3.98672	2.7868	-0.516593
chr17	58547085	58547573	0.0637031	1.95415	4.93903	21978	22222	-	-22222	APPBP2	1705	0	up	1	0.42	up	0.00045	0.716177	0.500997	-0.515513
chr14	50449212	50449693	0.382219	1.32281	1.79114	310	550	-	-550	C14orf182	2444	-0.83	down	0.639	-1.65	down	0.0819	3.74799	2.63024	-0.510926
chr10	45476572	45477226	0.254812	1.89402	2.89395	85	412	-	-412	RASSF4	2207	-0.66	down	0.0547	-0.2	down	0.528	9.09545	6.38772	-0.509844
chr17	618014	618423	0.637031	0.901915	0.501629	-82	122	-	-122	VPS53	13106	-0.35	down	3.05e-05	-0.22	down	0.0474	5.70554	4.00798	-0.509489
chr21	22537608	22537976	0.477773	1.413	1.56436	14274	14458	+	14458	AK021495	2097	0	no	NA	0	no	NA	1.64721	1.15856	-0.507693
chr13	23952080	23952652	0.127406	1.26268	3.30898	2398	2684	-	-2684	SACS	15134	0.11	up	0.324	0.14	up	0.204	2.93633	2.06661	-0.506743
chr8	23202888	23203250	0.159258	1.05223	2.72402	3839	4020	-	-4020	LOC100507156	1798	-2.49	down	0	-1.05	down	4.05e-59	4.53579	3.19386	-0.506053
chr5	142382087	142382725	0.637031	1.92409	1.59474	7576	7895	+	7895	ARHGAP26	556	0.99	up	1	-0.52	down	1	2.53049	1.7848	-0.503653
chr4	177159362	177159830	0.318515	1.14243	1.84267	637	871	-	-871	ASB5	552	0.18	up	1	1.74	up	0.0297	3.05569	2.16055	-0.500098
chr18	57385376	57385842	0.286664	0.992107	1.79114	20732	20965	-	-20965	CCBE1	6260	-0.19	down	0.0109	0.52	up	1.2e-13	7.20952	5.10391	-0.498299
chr10	99408701	99409056	0.222961	0.901915	2.0162	1648	1826	+	1826	PI4K2A/HOGA1	1113	-0.42	down	0.000172	-0.25	down	0.034	3.84348	2.72417	-0.496596
chr8	142053362	142053884	0.318515	2.04434	2.6822	11505	11766	+	11766	ENSG00000253266	1064	0	no	NA	-10000	down	0.673	1.14588	0.814121	-0.493145
chr13	74777554	74778217	0.445922	2.826	2.6639	27364	27695	+	27695	LOC100507612	3353	-3.18	down	0.0507	-0.6	down	0.324	3.34216	2.37974	-0.489978
chr5	176972421	176972990	0.318515	1.56332	2.29518	6070	6354	-	-6354	FAM193B	568	-0.44	down	0.14	-0.36	down	0.225	2.19628	1.56562	-0.488328
chr8	67036060	67036544	0.222961	1.02217	2.19677	2587	2829	+	2829	TRIM55	2912	-10000	down	0.639	10000	up	0.362	3.29441	2.34843	-0.488328
chr2	40330562	40331160	0.382219	1.98421	2.3761	884	1183	+	1183	SLC8A1	2638	-2.38	down	0.0862	0.21	up	0.968	3.29441	2.34843	-0.488328
chr4	26016772	26017317	0.509625	1.56332	1.61711	68344	68616	-	-68616	ENSG00000223895	439	0	no	NA	0	no	NA	5.03711	3.60092	-0.484231
chr18	20805207	20805861	0.222961	3.27696	3.8775	11223	11550	-	-11550	CABLES1	1057	-0.93	down	1.75e-09	-0.03	down	1	2.05304	1.47168	-0.480298
chr6	36337309	36337742	0.254812	1.50319	2.56052	2888	3104	-	-3104	ETV7	857	-2.58	down	0.01	0.2	up	0.791	3.58089	2.56761	-0.479889
chr2	113998487	113999026	0.41407	1.89402	2.19351	-168	101	-	-101	PAX8	1414	0	no	NA	0.52	up	1	7.28113	5.22916	-0.477583
chr17	15862367	15862801	0.0955546	1.05223	3.46099	14136	14353	-	-14353	ADORA2B	1735	-0.28	down	0.405	-0.2	down	0.553	1.7427	1.25249	-0.476519
chr3	43775072	43775514	0.573328	1.7437	1.60472	140	361	-	-361	AK024375	4373	-0.59	down	0.78	-0.17	down	0.914	3.2228	2.31711	-0.475985
chr6	169435367	169435933	0.445922	1.23262	1.46686	-196	87	+	87	ENSG00000229720	934	-1.71	down	0.0305	-3.73	down	0.0103	4.34481	3.13123	-0.472561
chr5	176973166	176973745	0.318515	1.83389	2.52548	6522	6811	+	6811	FAM193B	426	-0.56	down	0.0779	-0.35	down	0.34	2.33951	1.69087	-0.468445
chr15	85455529	85455926	0.191109	1.14243	2.57963	13962	14161	+	14161	SLC28A1	1334	0	no	NA	10000	up	1	5.53844	4.00798	-0.466603
chr4	159917806	159918218	0.222961	1.02217	2.19677	10053	10259	+	10259	ENSG00000248988	717	-1.28	down	0.172	-0.2	down	0.936	0.692304	0.500997	-0.466603
chr4	107504622	107505108	0.254812	2.10447	3.04595	81194	81437	-	-81437	LOC100507096	1644	0	no	NA	0	no	NA	2.29177	1.65955	-0.465664
chr3	59639744	59640251	0.637031	1.47313	1.20945	94786	95040	+	95040	FHIT	3229	-2.34	down	0.0863	-0.64	down	0.955	2.45887	1.7848	-0.462233
chr3	11507744	11508103	0.350367	1.23262	1.81479	10678	10857	+	10857	ATG7	455	0.07	up	0.785	-0.36	down	0.238	1.98142	1.44037	-0.4601
chr10	64548667	64549102	0.382219	1.02217	1.41917	4220	4438	+	4438	ENSG00000238280	688	0.11	up	0.609	-0.59	down	0.12	3.05569	2.22318	-0.458875
chr20	17824001	17824589	0.382219	1.53326	2.00413	43418	43712	+	43712	ENSG00000233625	632	0	no	NA	0	no	NA	6.70819	4.88473	-0.457646
chr1	201430209	201430611	0.41407	1.0823	1.38615	2900	3101	+	3101	ENSG00000224818	524	-0.1	down	0.902	0.05	up	1	4.89388	3.56961	-0.455212
chr6	152418088	152418686	0.286664	1.7437	2.60472	1371	1670	+	1670	ESR1	993	-3.08	down	0.0302	-1.68	down	0.221	3.12731	2.2858	-0.452221
chr5	55193722	55194121	0.159258	0.992107	2.63913	10764	10963	+	10963	IL31RA	2453	0.15	up	1	-0.56	down	1	2.05304	1.50299	-0.449925
chr7	33907679	33908203	0.382219	1.23262	1.68926	-90	172	+	172	ENSG00000233219	380	0	no	NA	0	no	NA	1.62333	1.18987	-0.448158
chr14	25435203	25435741	0.541476	1.65351	1.61056	82465	82734	+	82734	STXBP6	1223	-2.53	down	7.76e-47	-1.36	down	5.19e-08	1.79044	1.31512	-0.445124
chr6	160122530	160123041	0.191109	1.23262	2.68926	96	352	-	-352	AK092560	2654	-1.66	down	0.211	0.9	up	0.673	2.55436	1.87874	-0.443199
chr8	130648085	130648554	0.605179	1.71364	1.50163	42826	43061	+	43061	ENSG00000254223	683	0	no	NA	0	no	NA	0.978775	0.720184	-0.442612
chr2	110405443	110405829	0.222961	0.962043	2.10931	16957	17150	+	17150	ENSG00000230603	220	-10000	down	0.639	10000	up	1	1.90981	1.40906	-0.438697
chr19	46010487	46011010	0.222961	1.05223	2.23859	-236	26	-	-26	VASP	1451	-0.64	down	1.15e-19	0.4	up	1.43e-06	11.244	8.29777	-0.438357
chr2	196396481	196396927	0.41407	1.35287	1.70808	832	1055	+	1055	ENSG00000223466	850	1.85	up	0.569	-0.11	down	1	3.2228	2.37974	-0.43751
chr8	121797947	121798413	0.318515	1.35287	2.08659	8875	9108	-	-9108	ENSG00000248318	1973	0	no	NA	0	no	NA	3.93897	2.91205	-0.435786
chr18	71983807	71984503	0.286664	3.12664	3.44718	697	1045	-	-1045	DKFZP781G0119	5066	0	no	NA	0	no	NA	0.549069	0.40706	-0.431745
chr15	67316543	67317236	0.509625	3.00638	2.56052	23120	23467	-	-23467	FBH1	272	0	no	NA	0	no	NA	7.66309	5.69885	-0.427257
chr7	94843237	94843728	0.286664	1.11236	1.95619	-84	162	+	162	ENSG00000236197	2077	10000	up	0.249	10000	up	0.752	1.59946	1.18987	-0.426784
chr4	77674959	77675368	0.318515	1.26268	1.98706	370	575	+	575	SHROOM3	764	0.49	up	0.144	0.7	up	0.0285	6.3501	4.72816	-0.4255
chr4	154435288	154435641	0.318515	0.992107	1.63913	21950	22127	-	-22127	AK026561	587	0	no	NA	0	no	NA	2.10079	1.56562	-0.424198
chr7	129932556	129933344	0.350367	2.58549	2.8835	-370	24	+	24	CPA4	1737	-2.32	down	1.18e-100	-1.9	down	1.25e-84	3.6525	2.72417	-0.423067
chr17	4230947	4231383	0.350367	1.05223	1.58652	17713	17931	-	-17931	UBE2G1	1068	-0.03	down	0.992	-0.06	down	0.691	1.88593	1.40906	-0.42055
chr12	2448153	2448654	0.286664	1.44306	2.3317	104630	104881	+	104881	CACNA1C	5362	-0.47	down	3.51e-05	0.1	up	0.732	3.89123	2.91205	-0.418192
chr5	110245577	110246093	0.41407	1.50319	1.86008	37635	37893	+	37893	ENSG00000248966	2752	0.32	up	0.045	0.09	up	0.846	1.16976	0.876746	-0.415977
chr10	33798117	33798521	0.732586	1.14243	0.641032	69338	69540	+	69540	ENSG00000226412	862	0	no	NA	0	no	NA	0.334216	0.250499	-0.415977
chr16	67089529	67089973	0.350367	1.02217	1.5447	18992	19214	-	-19214	CBFB	2695	-0.04	down	0.66	0.12	up	0.374	1.67108	1.25249	-0.415977
chr4	77535721	77536226	0.318515	1.20255	1.91667	22550	22802	+	22802	ENSG00000231335	239	0.64	up	1	1.06	up	0.896	3.17505	2.37974	-0.415977
chr1	218669817	218670398	0.254812	1.38294	2.44023	27784	28074	+	28074	ENSG00000228208	813	0	no	NA	-10000	down	0.673	1.50397	1.12724	-0.415977
chr17	81150831	81151330	0.318515	1.38294	2.1183	14592	14841	+	14841	ENSG00000224813	498	0	no	NA	0	no	NA	11.1485	8.3604	-0.415205
chr12	65930704	65931076	0.350367	1.26268	1.84955	20603	20789	+	20789	LOC100507065	1386	-10000	down	0.117	-1.31	down	0.575	4.63128	3.47567	-0.414119
chr1	41433114	41433920	0.222961	2.826	3.6639	11087	11490	+	11490	CTPS	3199	0.77	up	5.98e-43	0.38	up	3.91e-05	2.12466	1.59693	-0.41193
chr7	22616918	22617689	0.382219	2.46524	2.68926	3304	3689	-	-3689	LOC100506178/LOC100507876	2432	-3.11	down	3.53e-15	-1.49	down	0.000596	3.9151	2.94336	-0.411585
chr2	47082177	47082905	0.222961	2.37504	3.41309	-78	286	+	286	LOC388948/LOC100134259	803	-1.09	down	5.06e-07	-2.48	down	4.34e-37	8.40314	6.32509	-0.409842
chr15	67397528	67398242	0.382219	3.06651	3.00413	3423	3780	+	3780	AK129712	1359	0	no	NA	0	no	NA	6.44559	4.85341	-0.409313
chr9	137516670	137517158	0.41407	1.20255	1.53815	2518	2762	+	2762	ENSG00000225565	599	1.65	up	0.203	-2.11	down	0.511	6.27849	4.72816	-0.409137
chr13	20993870	20994476	0.127406	1.92409	3.91667	6793	7096	+	7096	CRYL1	600	0.65	up	0.00884	0.74	up	0.0118	1.57559	1.18987	-0.405089
chr12	116757812	116758176	0.286664	1.98421	2.79114	42669	42851	-	-42851	MED13L	9528	0.18	up	0.0226	0.33	up	0.000161	4.84613	3.66354	-0.403593
chr1	236074069	236074651	0.41407	2.07441	2.32475	27095	27386	-	-27386	LYST	5057	-0.58	down	0.00536	0.01	up	0.912	3.84348	2.91205	-0.40038
chr9	111774742	111775042	0.127406	1.413	3.47126	722	872	+	872	CTNNAL1	2445	-0.08	down	0.523	-0.11	down	0.473	7.47211	5.66753	-0.398795
chr2	10545481	10545995	0.350367	1.29275	1.8835	13978	14235	+	14235	HPCAL1	586	-1.29	down	1.44e-33	-1.32	down	3.88e-31	4.98937	3.78879	-0.397118
chr1	93794270	93794789	0.477773	1.32281	1.46921	2816	3075	-	-3075	LOC100131564	436	-0.08	down	1	0.69	up	0.324	1.36074	1.03331	-0.397118
chr21	47469094	47469738	0.286664	1.50319	2.3906	2772	3094	+	3094	ENSG00000228235	414	0	no	NA	0	no	NA	7.99731	6.07459	-0.396727
chr2	234395594	234396162	0.254812	1.56332	2.61711	165	449	+	449	USP40	1047	-0.44	down	0.0302	-0.68	down	0.00069	5.27584	4.00798	-0.396525
chr22	26155719	26156215	0.127406	0.931979	2.87086	845	1093	+	1093	MYO18B	8321	-1.18	down	0.759	-0.12	down	0.889	2.84084	2.16055	-0.394916
chr6	4352003	4352676	0.350367	2.52536	2.84955	4732	5069	-	-5069	ENSG00000231811	332	0	no	NA	10000	up	1	2.67373	2.0353	-0.393609
chr22	38148374	38148701	0.382219	1.23262	1.68926	598	762	-	-762	TRIOBP/NOL12	1116	-0.33	down	1.18e-05	-0.1	down	0.44	6.37398	4.85341	-0.393194
chr2	45168506	45169006	0.477773	1.14243	1.2577	-140	110	-	-110	LOC100506108	1000	0	no	NA	0	no	NA	1.4801	1.12724	-0.392894
chr1	8149651	8150862	0.350367	4.53964	3.69564	31128	31733	-	-31733	ENSG00000232848	800	0.64	up	1	10000	up	1	3.24667	2.47368	-0.392304
chr8	101964131	101964612	0.732586	1.0823	0.563029	-226	15	-	-15	YWHAZ	3067	-0.19	down	0.00533	0.07	up	0.673	13.8461	10.5523	-0.391927
chr1	178310366	178310922	0.350367	1.26268	1.84955	-258	20	+	20	RASAL2	3038	0.15	up	0.208	0.02	up	0.896	1.02652	0.782809	-0.391031
chr3	71221971	71222476	0.318515	1.62345	2.34963	19402	19654	-	-19654	AK022443	1742	10000	up	1	0	no	NA	4.10608	3.13123	-0.391031
chr16	84178634	84179079	0.573328	0.871852	0.604722	-214	9	+	9	LRRC50	1438	-10000	down	0.214	0	no	NA	4.10608	3.13123	-0.391031
chr6	57107174	57107688	0.222961	1.32281	2.56874	17547	17804	+	17804	LOC100506188	1547	-2.32	down	1.53e-05	-0.11	down	0.955	2.45887	1.87874	-0.388232
chr5	111333151	111333798	0.318515	1.59338	2.32266	-10	313	-	-313	C5orf13	636	-1.32	down	7.25e-69	0.82	up	4.88e-31	3.43765	2.63024	-0.38623
chr6	3389976	3390449	0.541476	1.413	1.38379	11756	11992	-	-11992	SLC22A23	561	-1.28	down	0.00171	-0.17	down	0.937	4.98937	3.82011	-0.385244
chr14	52074422	52074901	0.477773	1.59338	1.7377	41332	41572	+	41572	C14orf82	2229	-1.35	down	0.0111	0.29	up	0.752	6.49334	4.97866	-0.383202
chr12	116820966	116821401	0.382219	1.20255	1.65363	105824	106041	-	-106041	MED13L	9528	0.18	up	0.0226	0.33	up	0.000161	6.20687	4.75948	-0.383063
chr5	168587924	168588493	0.382219	1.62345	2.08659	4704	4988	-	-4988	AK098553	1363	0	no	NA	0	no	NA	3.34216	2.56761	-0.380353
chr11	45868458	45868816	0.445922	0.811724	0.864199	-147	32	+	32	CRY2	4065	-0.07	down	0.653	-0.43	down	0.000414	3.86736	2.97467	-0.378617
chr2	15309825	15310274	0.477773	1.44306	1.59474	458	683	+	683	NBAS	3693	0.14	up	0.588	-0.2	down	0.606	3.29441	2.5363	-0.377297
chr10	81914940	81915546	0.445922	1.89402	2.08659	-206	97	+	97	ANXA11	2005	0.07	up	0.484	0.37	up	4.09e-06	4.79839	3.69486	-0.377031
chr22	27610141	27610738	0.350367	1.50319	2.10109	6572	6870	+	6870	ENSG00000233521	637	-4.61	down	3.17e-11	-3.97	down	1.09e-11	3.70025	2.84942	-0.376952
chr2	232504944	232505381	0.159258	0.992107	2.63913	45950	46168	-	-46168	C2orf57	1420	0	no	NA	0	no	NA	2.60211	2.00399	-0.376807
chr11	86230032	86230551	0.541476	1.38294	1.35277	20866	21126	-	-21126	ME3	619	-0.14	down	0.651	0.01	up	1	2.435	1.87874	-0.374157
chr1	36851851	36852626	0.605179	1.92409	1.66874	-282	106	-	-106	STK40	3708	-0.25	down	0.00642	-0.22	down	0.0401	5.80103	4.47767	-0.373563
chr3	123372150	123372901	0.254812	1.98421	2.96106	3072	3447	+	3447	MYLK	820	-1.31	down	3.76e-38	-0.59	down	1.67e-07	7.09015	5.47966	-0.37173
chr8	19148949	19149459	0.286664	1.38294	2.2703	21622	21877	+	21877	SH2D4A	3014	-0.96	down	4.3e-56	-1.1	down	3.53e-47	2.67373	2.06661	-0.371583
chrx	153305675	153306251	0.318515	1.38294	2.1183	999999999	999999999	?	1									2.26789	1.75349	-0.371123
chrx	43871846	43872318	0.382219	1.44306	1.91667	999999999	999999999	?	1									0.93103	0.720184	-0.370463
chr11	64546317	64546661	0.668883	0.811724	0.279236	1	173	-	-173	SF1	2953	-0.31	down	1.62e-05	-0.17	down	0.12	7.04241	5.44835	-0.37025
chr2	125925340	125925706	0.382219	1.0823	1.50163	252428	252611	-	-252611	CNTNAP5	3314	0	no	NA	0	no	NA	4.24932	3.2878	-0.37011
chr2	47039730	47040051	0.159258	1.29275	3.021	3756	3917	+	3917	LOC388948/LOC100134259	1588	-2.34	down	0.0157	-0.6	down	0.757	9.95486	7.70284	-0.370011
chr6	160137641	160138226	0.700734	1.92409	1.45723	2624	2917	-	-2917	ENSG00000220305	1185	-0.01	down	1	-0.61	down	1	2.38726	1.84743	-0.369835
chr14	69714404	69714798	0.350367	1.05223	1.58652	3667	3864	-	-3864	EXD2	5122	0.11	up	0.384	0.24	up	0.0408	1.05039	0.814121	-0.367614
chr6	17932607	17933124	0.509625	1.14243	1.16459	4866	5125	+	5125	AK130618	1248	-10000	down	0.639	0.23	up	1	2.10079	1.62824	-0.367614
chr13	24364699	24365476	0.541476	3.99849	2.88449	24456	24845	-	-24845	ENSG00000232102	171	0	no	NA	0	no	NA	4.84613	3.75748	-0.367068
chr9	22084601	22085126	0.509625	1.26268	1.30898	6712	6974	-	-6974	MTAP/CDKN2B-AS1	393	-2.04	down	0.223	-1.59	down	0.59	2.33951	1.81612	-0.365351
chr12	14480537	14481125	0.286664	1.23262	2.10429	28674	28968	+	28968	ENSG00000244573	653	0	no	NA	0	no	NA	3.10343	2.41105	-0.364204
chr5	83140222	83140835	0.477773	1.68358	1.81713	30150	30457	+	30457	ENSG00000250013	656	0	no	NA	0	no	NA	2.57824	2.00399	-0.36351
chr11	14443903	14444407	0.191109	1.32281	2.79114	17926	18178	+	18178	ENSG00000255074	513	-10000	down	0.639	-10000	down	0.673	5.3952	4.19585	-0.362712
chr14	50527485	50528196	0.382219	2.73581	2.8395	7198	7553	-	-7553	ENSG00000243038	713	0	no	NA	10000	up	1	7.44824	5.79278	-0.362643
chr5	111341310	111341610	0.222961	1.02217	2.19677	8149	8299	-	-8299	C5orf13	636	-1.32	down	7.25e-69	0.82	up	4.88e-31	2.93633	2.2858	-0.361312
chr18	8835346	8836002	0.382219	1.7437	2.18968	2570	2898	-	-2898	KIAA0802	6120	-0.87	down	4.17e-33	-0.31	down	0.0021	0.763922	0.594935	-0.360695
chr3	151976151	151976661	0.509625	1.413	1.47126	3744	3999	+	3999	LOC401093	6645	0.04	up	0.639	1.37	up	3.2e-70	1.52784	1.18987	-0.360695
chr14	77843555	77843954	0.605179	0.992107	0.713133	-192	8	-	-8	SAMD15	1735	-0.65	down	0.0659	-0.59	down	0.332	6.58883	5.13522	-0.359595
chr21	44144262	44144811	0.318515	1.35287	2.08659	7058	7332	+	7332	PDE9A	1663	2.63	up	0.00075	1.52	up	0.852	3.53314	2.75549	-0.358644
chr18	43534288	43534776	0.254812	1.29275	2.34293	12464	12708	+	12708	EPG5	12633	-0.69	down	1.65e-47	-0.23	down	0.015	6.01589	4.69685	-0.357084
chr4	24780216	24780697	0.382219	1.83389	2.26244	6174	6414	-	-6414	ENSG00000248444	954	0	no	NA	0	no	NA	2.48275	1.94137	-0.354866
chr5	34715780	34716390	0.222961	2.31492	3.3761	-199	106	+	106	RAI14	569	-0.47	down	0.000319	0.3	up	0.0168	2.84084	2.22318	-0.353693
chr4	185574713	185575264	0.350367	1.50319	2.10109	3544	3820	+	3820	CCDC111	804	0.69	up	0.0162	0.18	up	0.6	2.9602	2.31711	-0.353365
chr1	8137106	8137791	0.254812	3.2469	3.67155	18582	18925	-	-18925	ENSG00000232848	800	0.64	up	1	10000	up	1	3.67638	2.88074	-0.351847
chr20	42567769	42568517	0.382219	2.31492	2.59849	5828	6202	+	6202	TOX2	2601	-1.5	down	1.56e-08	-0.63	down	0.0335	1.95755	1.5343	-0.351464
chrx	11359494	11359920	0.477773	1.05223	1.13906	999999999	999999999	?	1									0.716177	0.563622	-0.345588
chr1	215716441	215716976	0.541476	1.80383	1.73609	938	1205	-	-1205	KCTD3	4640	0.44	up	1.21e-09	0.18	up	0.111	0.477451	0.375748	-0.345588
chr9	131311608	131312231	0.41407	1.95415	2.23859	2458	2769	+	2769	ENSG00000228395	578	0.46	up	0.784	-0.77	down	0.68	2.86471	2.25449	-0.345588
chr10	123702160	123702736	0.254812	2.31492	3.18345	8744	9032	+	9032	LOC100130887	951	-0.61	down	0.706	1.35	up	0.436	1.31299	1.03331	-0.345588
chr7	100770044	100770513	0.541476	1.56332	1.52964	-134	101	+	101	SERPINE1	3136	-1.54	down	5.62e-205	-0.46	down	0.00017	5.99201	4.72816	-0.341761
chr2	36665891	36666240	0.477773	1.17249	1.29518	618	793	-	-793	AK023619	1727	0	no	NA	0	no	NA	2.45887	1.94137	-0.340926
chr6	17907820	17908362	0.254812	1.50319	2.56052	25211	25482	-	-25482	ENSG00000217340	3626	-10000	down	0.639	0	no	NA	4.67902	3.69486	-0.340689
chr11	35601029	35601600	0.159258	1.26268	2.98706	50	336	-	-336	ENSG00000254669	537	0	no	NA	0	no	NA	1.98142	1.56562	-0.339806
chr20	52390250	52390831	0.732586	1.38294	0.916666	25532	25822	+	25822	ENSG00000225563	345	0	no	NA	0	no	NA	3.84348	3.0373	-0.339626
chr19	4457698	4458205	0.700734	0.962043	0.457235	-92	161	-	-161	UBXN6	1915	-0.08	down	0.386	0.1	up	0.427	5.46682	4.3211	-0.339302
chr9	99257621	99258021	0.0637031	0.841788	3.72402	548	748	+	748	CDC14B	1868	0.47	up	0.0421	0.5	up	0.0518	1.7427	1.37774	-0.339015
chr20	48929302	48929876	0.254812	1.44306	2.50163	751	1038	-	-1038	LOC284751	943	-0.41	down	0.873	-0.32	down	0.713	4.27319	3.38173	-0.337551
chr20	36738206	36738804	0.509625	1.98421	1.96106	17440	17739	-	-17739	RPRD1B	3872	0.34	up	5.89e-05	-0.01	down	1	4.15383	3.2878	-0.33732
chrx	13416403	13416952	0.159258	1.0823	2.76466	999999999	999999999	?	1									2.64986	2.09793	-0.336949
chr5	95005202	95005601	0.286664	1.23262	2.10429	4862	5061	+	5061	SPATA9	510	0.77	up	1	-1.11	down	1	2.64986	2.09793	-0.336949
chr6	13508713	13509631	0.286664	2.07441	2.85527	11867	12326	+	12326	ENSG00000218265	780	-1.87	down	0.312	10000	up	1	1.02652	0.814121	-0.334447
chr6	4358749	4359424	0.41407	1.89402	2.19351	11478	11815	-	-11815	ENSG00000231811	332	0	no	NA	10000	up	1	3.62863	2.88074	-0.332988
chr1	210435745	210436693	0.41407	2.1646	2.38615	2291	2765	+	2765	ENSG00000228110	1121	-0.34	down	0.767	-0.27	down	0.815	4.72677	3.75748	-0.331088
chr9	101751758	101752347	0.382219	2.19466	2.52153	218	512	-	-512	COL15A1	977	-1.98	down	1.59e-45	-1.86	down	9.02e-31	3.03182	2.41105	-0.33052
chr19	14621371	14621763	0.159258	0.78166	2.29518	3819	4015	+	4015	DNAJB1	1471	-0.24	down	0.00987	-0.06	down	0.673	1.33686	1.06462	-0.328514
chr10	111746947	111747554	0.477773	1.32281	1.46921	8572	8876	+	8876	ADD3	697	-1.17	down	5.91e-116	-0.31	down	0.00167	2.67373	2.12924	-0.328514
chr5	151119569	151120310	0.41407	1.53326	1.88865	1566	1937	+	1937	ATOX1	4341	-0.06	down	0.633	0.03	up	0.789	6.56496	5.22916	-0.328206
chr2	153288603	153289245	0.382219	3.03645	2.98992	41454	41775	-	-41775	ENSG00000213197	959	0.05	up	0.829	-0.09	down	0.806	1.88593	1.50299	-0.327441
chr1	100817586	100818050	0.637031	1.11236	0.804192	-27	205	+	205	CDC14A	4181	1.32	up	7.2e-15	0.3	up	0.526	4.98937	3.97667	-0.327297
chr17	17780863	17781359	0.445922	1.23262	1.46686	5486	5734	-	-5734	TOM1L2	2077	-0.18	down	0.0876	0.89	up	1.1e-23	2.435	1.94137	-0.326851
chr4	7807189	7807643	0.509625	1.14243	1.16459	6302	6529	-	-6529	AFAP1	1638	-1	down	7.2e-73	-0.2	down	0.114	4.20157	3.35042	-0.326587
chr8	118990324	118990888	0.382219	1.7437	2.18968	8603	8885	-	-8885	AK129490	895	0	no	NA	0	no	NA	1.64721	1.31512	-0.324829
chr3	127487456	127487776	0.127406	1.47313	3.53138	227	387	+	387	MGLL	178	1.33	up	3.96e-22	0.94	up	1.24e-08	5.37133	4.28979	-0.324371
chr17	17838896	17839441	0.477773	2.07441	2.1183	19224	19497	+	19497	AK124293	2018	-10000	down	0.216	10000	up	1	3.05569	2.44236	-0.32322
chr12	28018376	28018776	0.318515	1.17249	1.88014	62403	62603	-	-62603	KLHDC5	6469	0.42	up	7.14e-08	0.1	up	0.593	4.34481	3.47567	-0.322001
chr1	16125364	16126418	0.222961	2.22472	3.31876	5584	6111	-	-6111	ENSG00000224321	490	2.4	up	0.0711	0.53	up	0.896	4.29706	3.44436	-0.319116
chr19	56060804	56061241	0.286664	0.931979	1.70094	3894	4113	-	-4113	LOC100130827	1079	1.17	up	1	10000	up	0.752	4.48804	3.60092	-0.317721
chr4	99981249	99981613	0.127406	1.23262	3.27422	1057	1239	+	1239	METAP1	715	-0.04	down	0.778	0.15	up	0.462	3.19892	2.56761	-0.317159
chr7	32132908	32133535	0.382219	2.25479	2.56052	15286	15600	-	-15600	PDE1C	582	-0.47	down	0.0185	0.02	up	1	3.81961	3.06861	-0.315841
chr8	13214851	13215433	0.382219	1.32281	1.79114	3812	4103	-	-4103	ENSG00000253257	130	0	no	NA	0	no	NA	1.90981	1.5343	-0.315841
chr17	76875638	76876001	0.222961	0.931979	2.06351	5184	5366	-	-5366	TIMP2	712	-0.11	down	0.246	0.07	up	0.622	5.49069	4.41504	-0.314561
chr2	46542374	46542955	0.382219	1.26268	1.72402	17470	17761	-	-17761	EPAS1	665	-1.18	down	1.12e-41	0.14	up	0.249	3.89123	3.13123	-0.313494
chr17	71287820	71288704	0.159258	1.47313	3.20945	5181	5623	-	-5623	CDC42EP4	862	0.46	up	0.0013	0.02	up	1	6.92304	5.5736	-0.312798
chr7	100797429	100797790	0.350367	0.871852	1.31522	-104	76	+	76	AP1S1	1297	-0.16	down	0.0647	0.26	up	0.00716	5.1326	4.13323	-0.312421
chr9	27154848	27155353	0.318515	1.29275	2.021	2326	2578	+	2578	TEK	2452	0.11	up	0.388	-0.55	down	0.000428	2.60211	2.09793	-0.310717
chr1	85763390	85764051	0.637031	2.04434	1.6822	19514	19844	-	-19844	LOC646626	853	1.04	up	0.271	0.16	up	0.98	4.15383	3.35042	-0.310099
chrx	71351744	71352072	0.541476	0.841788	0.636558	999999999	999999999	?	1									2.48275	2.00399	-0.309062
chr10	124254715	124255561	0.318515	1.47313	2.20945	5611	6034	+	6034	HTRA1	587	0.99	up	2.58e-98	-0.07	down	0.673	7.32888	5.91803	-0.308475
chr15	38421651	38422305	0.286664	1.86396	2.70094	56478	56805	-	-56805	LOC100507568	1256	0.27	up	0.701	0.81	up	0.286	2.36338	1.91005	-0.307242
chr16	29955362	29955751	0.445922	1.98421	2.15371	3156	3350	-	-3350	TMEM219	1024	-0.11	down	0.371	0.26	up	0.00904	2.55436	2.06661	-0.305695
chr8	38243416	38243929	0.637031	1.11236	0.804192	-204	53	+	53	LETM2	557	0.15	up	0.884	-0.25	down	0.863	6.23074	5.04129	-0.305611
chr15	99421258	99421751	0.286664	1.35287	2.23859	30184	30430	+	30430	IGF1R	3101	0.91	up	1.17e-55	0.89	up	4.9e-45	3.43765	2.7868	-0.302814
chrx	108595108	108595825	0.159258	1.83389	3.52548	999999999	999999999	?	1									0.501324	0.40706	-0.3005
chrx	148544213	148544769	0.254812	1.35287	2.40852	999999999	999999999	?	1									1.00265	0.814121	-0.3005
chr3	179898507	179899003	0.732586	1.20255	0.715032	19921	20169	+	20169	ENSG00000244589	73	0	no	NA	0	no	NA	1.69495	1.37774	-0.298938
chr16	88340421	88341298	0.286664	3.45734	3.59223	119896	120334	-	-120334	LOC100506735	3873	-1.21	down	4.28e-08	0.39	up	0.0919	5.77716	4.69685	-0.298667
chr2	138726718	138727372	0.254812	2.4953	3.29171	1704	2031	-	-2031	HNMT	739	0.92	up	3.42e-05	0.62	up	0.0285	1.88593	1.5343	-0.297693
chr1	198626667	198627212	0.382219	1.35287	1.82356	-14	258	-	-258	ENSG00000229933	416	-1.98	down	0.00264	-0.37	down	0.563	4.1777	3.41305	-0.291649
chr9	137348055	137348593	0.350367	0.871852	1.31522	15624	15893	-	-15893	RXRA	5770	0.31	up	7.09e-06	0.19	up	0.0532	11.5305	9.42502	-0.290882
chr13	46928749	46929377	0.318515	1.77377	2.47738	3607	3921	-	-3921	C13orf18	1733	-2.35	down	0.0575	-0.83	down	0.335	2.98407	2.44236	-0.289004
chr6	17945245	17945711	0.254812	1.05223	2.04595	4537	4770	-	-4770	AK130618	1248	-10000	down	0.639	0.23	up	1	2.10079	1.72218	-0.286694
chr8	131074142	131074726	0.318515	2.28485	2.84267	7155	7447	-	-7447	ASAP1	1449	-0.25	down	0.0305	0.19	up	0.148	1.90981	1.56562	-0.286694
chr1	112275951	112276389	0.541476	1.413	1.38379	5486	5705	+	5705	C1orf183	556	-1.71	down	5.33e-12	-2.03	down	7.11e-20	3.77187	3.09992	-0.283046
chr12	116819629	116820258	0.41407	1.38294	1.73979	104486	104801	-	-104801	MED13L	9528	0.18	up	0.0226	0.33	up	0.000161	9.35805	7.70284	-0.280818
chr11	94527339	94528156	0.350367	2.31492	2.72402	20	428	+	428	AMOTL1	1775	-0.1	down	0.539	0.2	up	0.139	3.9151	3.22517	-0.279674
chr15	63400096	63400677	0.382219	1.413	1.88629	13322	13613	+	13613	LACTB	1367	-0.63	down	1.4e-12	-0.63	down	9.92e-12	2.12466	1.75349	-0.277001
chr21	36260674	36261251	0.159258	1.26268	2.98706	-264	25	+	25	RUNX1	2722	-1.17	down	1.21e-37	-0.37	down	0.000351	8.49863	7.01396	-0.277001
chr8	22454766	22455340	0.254812	1.50319	2.56052	198	485	+	485	PDLIM2/C8orf58	4608	0.05	up	0.543	0.39	up	4.14e-06	9.14319	7.54627	-0.276934
chr10	15527839	15528813	0.605179	1.59338	1.39666	27135	27622	+	27622	ITGA8	6755	-2.1	down	8.11e-231	0.16	up	0.384	2.19628	1.81612	-0.274203
chr1	78805586	78806163	0.127406	1.413	3.47126	22638	22927	-	-22927	ENSG00000227556	107	0	no	NA	0	no	NA	4.01059	3.31911	-0.273019
chrx	13505715	13506483	0.286664	1.47313	2.36145	999999999	999999999	?	1									2.45887	2.0353	-0.272755
chr8	128352176	128352738	0.286664	1.38294	2.2703	657	938	-	-938	ENSG00000253929	290	0	no	NA	0	no	NA	3.70025	3.06861	-0.270037
chr20	48925060	48926051	0.382219	3.42728	3.16459	1196	1692	+	1692	ENSG00000233077	2250	1.04	up	0.175	0.94	up	0.244	5.58618	4.63423	-0.269534
chr3	48507025	48507326	0.637031	1.35287	1.08659	-116	34	+	34	TREX1/ATRIP	1105	0.21	up	0.118	0.04	up	1	7.01853	5.8241	-0.269136
chr12	106589150	106589909	0.668883	2.04434	1.61181	41750	42129	+	42129	CKAP4	2828	-0.52	down	1.61e-25	-0.14	down	0.257	1.88593	1.56562	-0.268547
chr3	124771326	124771826	0.127406	1.80383	3.82356	2976	3226	+	3226	HEG1	9156	-1.77	down	7.49e-283	-1.14	down	3.14e-53	4.48804	3.72617	-0.268393
chr2	227050401	227050926	0.41407	1.20255	1.53815	314	577	-	-577	ENSG00000235070	1134	0	no	NA	0	no	NA	2.14853	1.7848	-0.267585
chr7	158648980	158649311	0.732586	0.751596	0.0369605	-42	123	+	123	WDR60	3772	-0.16	down	0.193	-0.23	down	0.113	4.29706	3.56961	-0.267585
chr7	20073068	20073670	0.350367	1.68358	2.26459	26340	26641	-	-26641	MACC1	587	10000	up	1	0	no	NA	3.12731	2.59892	-0.267006
chr6	158640149	158640698	0.382219	1.38294	1.85527	12570	12844	+	12844	LOC100505560	595	-0.07	down	0.665	-0.64	down	0.279	0.978775	0.814121	-0.265735
chr5	52658158	52658928	0.318515	2.85607	3.16459	50406	50791	+	50791	ENSG00000240052	437	0	no	NA	0	no	NA	3.19892	2.66155	-0.265321
chr4	13893846	13894596	0.318515	2.1646	2.76466	38256	38631	+	38631	ENSG00000250634	2228	-10000	down	0.38	0	no	NA	5.49069	4.5716	-0.264288
chr12	118122837	118123613	0.254812	1.47313	2.53138	7781	8169	-	-8169	KSR2	1513	0	no	NA	0	no	NA	3.93897	3.2878	-0.260699
chr15	71587646	71588251	0.41407	1.92409	2.21623	6860	7162	+	7162	AK022441	3537	0	no	NA	0	no	NA	5.06098	4.22717	-0.259727
chr12	63097101	63097806	0.191109	2.1646	3.50163	10964	11317	-	-11317	PPM1H	2712	0.05	up	1	-0.63	down	0.752	5.80103	4.85341	-0.25731
chr15	45934394	45934948	0.350367	1.56332	2.15767	3131	3408	+	3408	SQRDL	1764	1.34	up	4.98e-207	0.98	up	3.1e-38	3.62863	3.0373	-0.256637
chr20	1914780	1915815	0.222961	2.07441	3.21784	2398	2916	+	2916	SIRPA	1596	-0.42	down	0.000136	0.57	up	6.15e-13	3.36603	2.81811	-0.256321
chr17	41277271	41277680	0.605179	0.901915	0.575629	-196	8	-	-8	BRCA1	7050	0.67	up	4.19e-10	-0.46	down	0.0154	1.98142	1.65955	-0.255741
chr22	30591818	30593044	0.573328	3.12664	2.44718	10054	10667	+	10667	ENSG00000225676	298	0	no	NA	0	no	NA	4.29706	3.60092	-0.254985
chr11	44863701	44864200	0.286664	1.17249	2.03214	16954	17204	+	17204	TSPAN18	565	0.69	up	0.0638	2.01	up	1.46e-11	3.31829	2.7868	-0.25183
chr19	57018749	57019200	0.700734	1.14243	0.705162	12	238	+	238	ZNF471	4967	0.23	up	0.196	-0.08	down	0.932	4.24932	3.56961	-0.251466
chr2	1656503	1657445	0.318515	2.28485	2.84267	-345	126	-	-126	PXDN	2643	0.1	up	0.208	0.17	up	0.0603	3.98672	3.35042	-0.25086
chr10	30093054	30093551	0.382219	2.37504	2.63548	67190	67438	-	-67438	SVIL	1962	-1.04	down	4.26e-29	-0.25	down	0.178	3.12731	2.63024	-0.249728
chr14	81867013	81867727	0.222961	3.06651	3.78174	2086	2443	-	-2443	STON2	2919	-3.06	down	0.0511	-10000	down	0.0322	3.12731	2.63024	-0.249728
chr7	79082858	79083390	0.318515	2.01428	2.66083	-114	152	+	152	LOC100505881/LOC100505895	1072	1.18	up	5.21e-51	0.41	up	0.00293	10.3607	8.73614	-0.246052
chr14	75086401	75086876	0.191109	1.65351	3.11306	7366	7604	-	-7604	LTBP2	8554	-0.07	down	0.59	-0.3	down	0.00544	6.01589	5.0726	-0.246052
chr2	191070391	191070876	0.477773	1.44306	1.59474	434	676	-	-676	HIBCH	396	-0.15	down	0.802	0.56	up	0.258	1.00265	0.845433	-0.246052
chr5	76083037	76083404	0.254812	0.811724	1.67155	31354	31538	+	31538	F2RL1	607	-1.91	down	0.119	-0.26	down	0.889	1.00265	0.845433	-0.246052
chr6	168619839	168620258	0.191109	1.29275	2.75797	5702	5911	+	5911	ENSG00000237987	455	0	no	NA	0	no	NA	3.74799	3.16255	-0.245032
chr10	24754180	24754783	0.286664	1.53326	2.41917	666	967	+	967	KIAA1217/PRINS	5030	-1.09	down	2.42e-48	-0.42	down	2.24e-05	6.25461	5.29179	-0.241166
chr9	22211628	22212184	0.350367	1.44306	2.0422	2487	2765	+	2765	ENSG00000236921	443	-10000	down	0.639	-10000	down	0.673	2.9602	2.50499	-0.24089
chr16	83847484	83848097	0.509625	1.68358	1.72402	886	1192	-	-1192	HSBP1	1178	-0.02	down	0.759	0.07	up	0.656	0.74005	0.626247	-0.24089
chr11	67121974	67122415	0.191109	1.05223	2.46099	908	1128	-	-1128	POLD4	559	0.07	up	0.695	0.11	up	0.731	7.71084	6.54428	-0.236654
chr6	3825985	3826702	0.445922	2.13453	2.25906	5466	5825	+	5825	ENSG00000238158	651	0	no	NA	0	no	NA	5.82491	4.94735	-0.235579
chr11	78808431	78808826	0.509625	1.20255	1.23859	74	271	+	271	ENSG00000255345	1897	-1.52	down	0.759	10000	up	1	1.69495	1.44037	-0.234807
chr6	158185542	158186086	0.127406	2.55543	4.32606	48464	48736	-	-48736	SNX9	3652	-0.3	down	8.92e-06	-0.32	down	0.000145	2.86471	2.44236	-0.230111
chr12	109219976	109220810	0.382219	3.75798	3.29749	371	788	+	788	SSH1	2258	-0.46	down	8.93e-08	0.08	up	0.665	7.63922	6.51297	-0.230111
chr19	39894111	39894797	0.191109	1.35287	2.82356	2690	3033	+	3033	ZFP36	1039	1.09	up	6.35e-58	1.3	up	4.32e-54	6.68432	5.69885	-0.230111
chr11	12011746	12012400	0.732586	3.03645	2.05132	3866	4193	+	4193	DKK3	566	-0.18	down	0.0557	0.21	up	0.0632	1.90981	1.62824	-0.230111
chr3	112497267	112497948	0.41407	2.31492	2.48301	23376	23717	+	23717	LOC100129297	327	0	no	NA	0	no	NA	4.91775	4.19585	-0.229034
chr12	120637498	120638037	0.127406	1.7437	3.77465	872	1142	+	1142	RPLP0	907	0.34	up	4.38e-08	-0.01	down	0.993	3.29441	2.81811	-0.225294
chr4	140164449	140165106	0.222961	1.38294	2.63287	22210	22539	+	22539	NDUFC1/C4orf49	1339	-2.23	down	4.15e-32	-0.34	down	0.212	2.88858	2.47368	-0.223705
chr1	44515429	44516134	0.41407	1.86396	2.17042	652	1004	+	1004	KLF17	654	0.57	up	1	1.63	up	0.263	2.33951	2.00399	-0.223332
chr14	69149547	69150119	0.382219	1.59338	2.05962	-231	55	+	55	RAD51L1	618	0.08	up	1	0.35	up	0.98	6.42172	5.51097	-0.220653
chr12	96631331	96631954	0.286664	2.40511	3.06867	13996	14307	-	-14307	ELK3	1876	0.67	up	5.79e-21	0.58	up	6.86e-13	3.93897	3.38173	-0.220057
chr5	36502549	36503231	0.445922	1.89402	2.08659	85377	85718	+	85718	ENSG00000242292	156	0	no	NA	0	no	NA	2.76922	2.37974	-0.218676
chr2	145213995	145214639	0.254812	3.30702	3.69803	4040	4362	+	4362	ZEB2	2967	-10000	down	0.0637	-1.15	down	1	0.763922	0.657559	-0.216305
chr10	14105895	14106465	0.286664	1.35287	2.23859	9818	10103	+	10103	ENSG00000235410	790	-10000	down	0.38	-1.57	down	0.799	2.36338	2.0353	-0.215611
chr17	4699224	4699524	0.254812	0.962043	1.91667	-67	83	+	83	PSMB6	825	-0.07	down	0.463	0.06	up	0.62	3.19892	2.75549	-0.21528
chr4	10108106	10108593	0.191109	1.32281	2.79114	-74	170	-	-170	WDR1	549	-0.4	down	3.8e-10	0.29	up	0.000474	5.77716	4.97866	-0.214603
chr1	55400462	55400881	0.222961	0.931979	2.06351	21618	21827	-	-21827	ENSG00000198549	536	0	no	NA	0	no	NA	1.67108	1.44037	-0.214343
chr12	96199641	96200187	0.382219	1.65351	2.11306	2766	3039	-	-3039	LOC100505645/LOC100508791	400	0	no	NA	0	no	NA	3.41378	2.94336	-0.213905
chr11	35121331	35121959	0.222961	2.94626	3.72402	32238	32552	+	32552	LOC100507144	1102	-2.32	down	0.354	-0.32	down	1	3.48539	3.00598	-0.213484
chr18	59369166	59369601	0.286664	1.0823	1.91667	45808	46025	+	46025	AK054836	2206	0	no	NA	10000	up	1	2.64986	2.2858	-0.213214
chr2	98486688	98487359	0.41407	1.26268	1.60854	16836	17171	+	17171	TMEM131	568	-0.07	down	0.984	-0.34	down	0.33	2.79309	2.41105	-0.2122
chr6	106535639	106536255	0.573328	2.01428	1.81283	-26	282	+	282	PRDM1	649	-0.92	down	0.626	-4.17	down	0.0189	2.79309	2.41105	-0.2122
chr9	132672802	132673300	0.222961	1.0823	2.27924	-197	52	-	-52	FNBP1	2623	0.56	up	4.89e-08	0.21	up	0.206	1.95755	1.69087	-0.211287
chr3	113549265	113549872	0.254812	1.7437	2.77465	2236	2539	-	-2539	GRAMD1C	2236	-0.31	down	0.767	0.62	up	0.712	1.05039	0.908058	-0.210073
chr15	73082460	73082958	0.350367	1.32281	1.91667	2984	3233	-	-3233	LOC100287559	3165	-10000	down	0.38	-10000	down	0.4	1.12201	0.970683	-0.209015
chr2	206185920	206186381	0.382219	1.26268	1.72402	19288	19519	-	-19519	PARD3B	2968	0.64	up	1.39e-06	0.65	up	0.00014	2.31564	2.00399	-0.208535
chr15	63220990	63221468	0.509625	2.22472	2.12612	23904	24143	+	24143	ENSG00000213712	950	0.09	up	0.796	0.08	up	0.927	4.15383	3.60092	-0.206076
chr10	102650334	102650796	0.41407	1.29275	1.64249	21530	21761	+	21761	FAM178A	4122	-0.32	down	0.00926	-0.29	down	0.0295	1.40848	1.22118	-0.205863
chr4	177715298	177715826	0.382219	1.89402	2.30898	1403	1667	-	-1667	VEGFC	2079	-1.85	down	1.36e-204	-0.26	down	0.00301	4.65515	4.03929	-0.204725
chr16	66907075	66907555	0.159258	1.02217	2.6822	4937	5177	+	5177	PDP2	1920	-0.04	down	1	0.13	up	0.728	3.81961	3.31911	-0.20263
chr8	118683989	118684705	0.286664	1.50319	2.3906	122024	122382	+	122382	EXT1	8270	-1.07	down	5.29e-98	-0.62	down	9.39e-20	2.12466	1.84743	-0.201713
chr8	38517393	38518003	0.254812	3.39721	3.73685	40141	40446	+	40446	ENSG00000254321	735	0	no	NA	0	no	NA	2.19628	1.91005	-0.201447
chr2	75822937	75823552	0.254812	1.35287	2.40852	1646	1953	+	1953	ENSG00000230477	489	0	no	NA	0	no	NA	4.60741	4.00798	-0.201079
chr2	43191519	43192102	0.159258	1.23262	2.95229	36360	36652	+	36652	ENSG00000224739	400	0	no	NA	0	no	NA	7.16177	6.23116	-0.200816
chr10	80015778	80016193	0.350367	1.11236	1.66669	3376	3584	-	-3584	LOC100132987	2951	-3.58	down	8.95e-42	-2.36	down	1.11e-39	7.44824	6.48166	-0.200538
chr1	210771494	210772094	0.382219	1.29275	1.75797	27291	27591	+	27591	LOC100505631	2280	0	no	NA	0	no	NA	5.03711	4.38373	-0.200438
chr1	151964770	151965455	0.159258	1.47313	3.20945	-284	58	-	-58	S100A10	616	0.43	up	1.36e-14	0.1	up	0.358	7.80633	6.79478	-0.200218
chr4	7829932	7830576	0.350367	1.89402	2.43451	9739	10061	+	10061	AFAP1	764	-0.93	down	1.79e-16	-0.03	down	0.965	2.98407	2.59892	-0.199367
chr7	41956150	41956576	0.159258	1.71364	3.42763	43971	44184	+	44184	GLI3	8215	0.34	up	0.000899	-0.08	down	0.739	3.48539	3.0373	-0.198534
chr16	17499109	17499699	0.350367	1.32281	1.91667	47202	47497	-	-47497	XYLT1	855	-0.36	down	0.000906	-0.48	down	0.000299	4.05834	3.53829	-0.197834
chrx	13450421	13451089	0.0637031	2.40511	5.23859	999999999	999999999	?	1									1.64721	1.44037	-0.193585
chr12	1567064	1567471	0.127406	0.931979	2.87086	13310	13513	-	-13513	ERC1	2267	-0.02	down	0.979	0.2	up	0.22	2.64986	2.31711	-0.193585
chr2	204668760	204669405	0.700734	2.37504	1.76102	30534	30857	-	-30857	ENSG00000213925	872	10000	up	1	-10000	down	0.673	5.44295	4.75948	-0.193585
chr2	19172210	19173236	0.445922	3.06651	2.78174	4481	4994	-	-4994	FLJ41481	1949	0.37	up	0.697	1.68	up	0.435	3.43765	3.00598	-0.193585
chr2	165463142	165463451	0.573328	1.65351	1.5281	13016	13171	+	13171	GRB14	587	1.03	up	0.0901	1.31	up	0.0624	1.00265	0.876746	-0.193585
chr16	88365496	88366134	0.573328	1.29275	1.17301	144970	145289	-	-145289	LOC100506735	3873	-1.21	down	4.28e-08	0.39	up	0.0919	5.82491	5.10391	-0.190631
chr12	125003023	125003906	0.668883	1.89402	1.50163	182	624	-	-624	NCOR2	1752	-0.11	down	0.422	0.3	up	0.0103	7.85407	6.88872	-0.189206
chr2	112375451	112376564	0.41407	3.30702	2.99759	5356	5913	-	-5913	ENSG00000225744	792	-10000	down	0.639	0	no	NA	3.46152	3.0373	-0.188619
chr12	89556351	89556851	0.286664	1.23262	2.10429	142882	143132	-	-143132	LOC728084	2509	10000	up	1	10000	up	1	3.24667	2.84942	-0.18829
chr18	3013327	3013798	0.668883	1.02217	0.611812	14	249	-	-249	LPIN2	936	-0.1	down	0.646	0.41	up	0.0509	5.63393	4.94735	-0.187485
chr19	42772433	42773402	0.477773	4.62983	3.27656	10746	11231	+	11231	CIC	323	-0.71	down	0.0119	-0.4	down	0.516	5.56231	4.88473	-0.187406
chr3	39188413	39188974	0.318515	1.47313	2.20945	250	531	-	-531	CSRNP1	2939	-0.14	down	0.21	-0.03	down	0.954	5.06098	4.44635	-0.186796
chr1	22257675	22258149	0.477773	1.0823	1.1797	5601	5838	+	5838	HSPG2	14286	0.07	up	0.288	0.24	up	0.0254	6.44559	5.66753	-0.185592
chr7	100768025	100768437	0.286664	0.871852	1.60472	1942	2148	+	2148	SERPINE1	3136	-1.54	down	5.62e-205	-0.46	down	0.00017	4.27319	3.75748	-0.185547
chr3	66445275	66445626	0.382219	1.35287	1.82356	7144	7320	-	-7320	SLC25A26	3405	-0.34	down	0.00354	-0.26	down	0.0759	3.84348	3.38173	-0.184652
chr11	109117703	109118331	0.445922	1.86396	2.06351	107481	107795	+	107795	ENSG00000255028	540	0	no	NA	-10000	down	0.673	1.81432	1.59693	-0.184124
chr6	3390823	3391351	0.254812	1.62345	2.67155	12603	12867	-	-12867	SLC22A23	561	-1.28	down	0.00171	-0.17	down	0.937	5.15647	4.54029	-0.183601
chr5	140904128	140904789	0.637031	1.59338	1.32266	-210	121	-	-121	DIAPH1	619	0.24	up	0.0351	0.29	up	0.05	4.36868	3.85142	-0.181808
chr3	121713964	121714398	0.382219	0.931979	1.2859	1536	1753	-	-1753	ILDR1	835	0	no	NA	0	no	NA	2.84084	2.50499	-0.181512
chr14	62020446	62021130	0.605179	2.34498	1.95414	2748	3090	-	-3090	PRKCH	2960	2.14	up	1.17e-29	0.61	up	0.0251	6.77981	5.98066	-0.180941
chr1	86088658	86089288	0.509625	1.59338	1.64459	22241	22556	-	-22556	ENSG00000230285	255	0	no	NA	-10000	down	0.673	2.55436	2.25449	-0.180164
chr14	51771746	51772046	0.191109	1.11236	2.54116	28065	28215	+	28215	LOC283553	576	-1.83	down	0.759	0.35	up	1	1.16976	1.03331	-0.178938
chr13	36553457	36554081	0.254812	1.50319	2.56052	123459	123771	-	-123771	DCLK1	899	0.15	up	0.908	-1.43	down	0.0309	2.26789	2.00399	-0.178478
chr15	67417723	67418604	0.318515	3.00638	3.23859	-410	30	+	30	SMAD3	1427	-1.13	down	6.06e-56	0.03	up	0.987	6.23074	5.51097	-0.177097
chr1	151967449	151967906	0.191109	1.14243	2.57963	442	671	-	-671	ENSG00000240667	4109	10000	up	1	-0.61	down	1	2.93633	2.59892	-0.176097
chr2	145274902	145275551	0.127406	1.62345	3.67155	-314	10	-	-10	ZEB2	555	-0.35	down	0.296	0.28	up	0.634	10.0742	8.92402	-0.174903
chr2	112416926	112417318	0.318515	0.992107	1.63913	15285	15481	+	15481	ENSG00000237583	318	0	no	NA	0	no	NA	3.46152	3.06861	-0.173822
chr16	70725730	70726209	0.541476	1.14243	1.07713	510	750	+	750	VAC14	657	-0.66	down	0.00023	-0.61	down	0.000775	11.435	10.1452	-0.172654
chr4	154598206	154598526	0.159258	1.44306	3.1797	885	1045	+	1045	ENSG00000250771	2292	0	no	NA	0	no	NA	0.811667	0.720184	-0.172523
chr9	110512947	110513671	0.286664	2.22472	2.95619	83119	83481	+	83481	bA380I20,1	321	0	no	NA	0	no	NA	4.29706	3.82011	-0.169738
chr6	11609488	11610328	0.222961	2.25479	3.33813	25731	26151	-	-26151	TMEM170B	8362	0.91	up	8.36e-16	0.09	up	0.752	3.48539	3.09992	-0.16909
chr10	119368726	119369293	0.191109	1.50319	2.97556	36758	37042	-	-37042	ENSG00000235198	475	0	no	NA	0	no	NA	4.01059	3.56961	-0.16805
chr7	41066952	41067386	0.477773	1.68358	1.81713	47415	47632	-	-47632	ENSG00000232458	3263	0	no	NA	-0.37	down	1	2.67373	2.37974	-0.16805
chr17	63921631	63922069	0.350367	1.02217	1.5447	22204	22423	-	-22423	AXIN2/CCDC46	1506	0.36	up	0.111	-0.21	down	0.792	1.93368	1.72218	-0.167113
chr2	197852562	197853029	0.541476	1.29275	1.25547	298	531	+	531	ANKRD44	1938	1.11	up	1.74e-18	0.55	up	0.00719	1.86206	1.65955	-0.166104
chr1	2143899	2144287	0.41407	0.721532	0.801189	-128	66	+	66	C1orf86	3575	-0.17	down	0.189	0.02	up	0.909	9.40579	8.39171	-0.164585
chr10	64342453	64343106	0.318515	1.62345	2.34963	60426	60753	+	60753	ZNF365	612	0	no	NA	0	no	NA	5.08486	4.54029	-0.163423
chr5	36657512	36658297	0.41407	3.33709	3.01064	8020	8412	+	8412	ENSG00000250155	478	-1.65	down	0.445	-1.15	down	0.725	3.67638	3.2878	-0.161163
chr9	117651980	117652333	0.286664	0.931979	1.70094	3670	3847	+	3847	TNFSF8	524	0	no	NA	0	no	NA	1.57559	1.40906	-0.161163
chr20	52828676	52829178	0.254812	1.71364	2.74956	1711	1962	+	1962	PFDN4	642	-0.4	down	0.000445	-0.3	down	0.0409	1.57559	1.40906	-0.161163
chr2	208123036	208123759	0.573328	3.27696	2.51493	1050	1411	+	1411	ENSG00000223725	581	1.33	up	0.00029	0.43	up	0.539	4.96549	4.44635	-0.159315
chr6	90928101	90928526	0.350367	2.10447	2.58652	138	350	-	-350	BACH2	436	-1.06	down	0.759	-10000	down	0.673	2.93633	2.63024	-0.158819
chr2	224590040	224590723	0.41407	1.71364	2.04912	19986	20327	-	-20327	ENSG00000226539	718	-0.15	down	0.761	-0.04	down	0.914	4.36868	3.91404	-0.158538
chr1	8121184	8121800	0.286664	1.59338	2.47466	2661	2969	-	-2969	ENSG00000232848	800	0.64	up	1	10000	up	1	2.86471	2.56761	-0.157961
chr12	63096301	63097001	0.286664	2.37504	3.05052	10164	10514	-	-10514	PPM1H	2712	0.05	up	1	-0.63	down	0.752	5.58618	5.00997	-0.157059
chr10	30971265	30971657	0.159258	0.841788	2.40209	9546	9742	+	9742	LOC645954	1683	-1.3	down	0.0204	-0.71	down	0.453	1.81432	1.62824	-0.15611
chr1	183248999	183249351	0.350367	1.56332	2.15767	582	758	-	-758	NMNAT2	1466	-0.22	down	0.391	-0.28	down	0.261	6.82755	6.13722	-0.153784
chr11	86458167	86458689	0.350367	2.19466	2.64706	17618	17879	+	17879	ENSG00000255250	504	-10000	down	0.639	-0.61	down	1	5.08486	4.5716	-0.153507
chr11	131941741	131942491	0.318515	2.37504	2.89852	68414	68789	+	68789	NTM	827	-1.18	down	1.22e-70	-0.86	down	1.62e-31	5.70554	5.13522	-0.151937
chr6	131227740	131228386	0.254812	2.01428	2.98276	2062	2385	-	-2385	EPB41L2	1689	-0.7	down	8.72e-20	-0.15	down	0.36	1.2175	1.09593	-0.151765
chr12	60093340	60093916	0.350367	2.01428	2.52332	10189	10477	-	-10477	SLC16A7	1568	-0.34	down	0.257	0.9	up	0.0183	0.763922	0.688872	-0.149191
chr8	128864051	128864784	0.445922	2.52536	2.50163	2190	2556	+	2556	PVT1	221	-1.01	down	0.319	0.12	up	0.997	4.20157	3.78879	-0.149191
chr9	136009029	136009431	0.318515	0.901915	1.50163	2525	2726	-	-2726	RALGDS/GBGT1	2919	-0.99	down	8.04e-24	-0.84	down	1.61e-22	1.90981	1.72218	-0.149191
chr2	242101315	242101826	0.286664	1.68358	2.5541	1466	1722	-	-1722	PPP1R7	583	0	down	0.916	-0.06	down	0.676	1.45623	1.31512	-0.147042
chr6	52459846	52460326	0.254812	1.32281	2.3761	4015	4255	-	-4255	TRAM2	1653	-0.28	down	0.00049	0.33	up	0.000167	4.98937	4.50898	-0.146056
chr9	80129778	80130326	0.350367	1.29275	1.8835	11287	11561	+	11561	ENSG00000231373	605	0	no	NA	0	no	NA	2.84084	2.56761	-0.145888
chr10	134133448	134133929	0.41407	1.20255	1.53815	3612	3853	+	3853	STK32C	733	0.53	up	0.136	-0.43	down	0.288	3.53314	3.19386	-0.14565
chr1	12193094	12193443	0.191109	0.841788	2.13906	2228	2402	+	2402	TNFRSF8	1464	-10000	down	0.38	0.49	up	1	1.76657	1.59693	-0.14565
chr17	64271695	64272173	0.254812	1.29275	2.34293	26753	26992	+	26992	PRKCA	8770	-0.07	down	0.469	-0.38	down	5.65e-06	2.76922	2.50499	-0.144675
chr18	59785462	59785960	0.318515	1.32281	2.05417	8079	8328	-	-8328	PIGN	2177	0.27	up	0.0325	0.27	up	0.085	0.692304	0.626247	-0.144675
chrx	46699654	46700067	0.573328	0.751596	0.390597	999999999	999999999	?	1									0.692304	0.626247	-0.144675
chr17	6655774	6656476	0.445922	1.32281	1.56874	2267	2618	-	-2618	ENSG00000244283	471	0	no	NA	0	no	NA	4.01059	3.63223	-0.142959
chr2	62638387	62639251	0.509625	2.34498	2.20207	51011	51443	+	51443	ENSG00000228541	424	-10000	down	0.639	0	no	NA	3.00794	2.72417	-0.142959
chr17	41434246	41434813	0.41407	1.14243	1.46415	74	358	+	358	AK023939	3070	0.18	up	0.885	1.44	up	0.435	1.00265	0.908058	-0.142959
chr4	148499045	148499719	0.445922	2.13453	2.25906	10287	10624	-	-10624	ENSG00000251688	1028	0	no	NA	0	no	NA	1.00265	0.908058	-0.142959
chr17	55970196	55970801	0.191109	2.19466	3.52153	7124	7426	-	-7426	CUEDC1	1537	0.62	up	1.99e-15	0.47	up	3.01e-07	6.49334	5.88672	-0.141496
chr22	26143402	26143901	0.445922	1.26268	1.50163	5282	5532	-	-5532	MYO18B	8568	-1.85	down	0.535	-0.12	down	0.889	5.41907	4.91604	-0.14055
chr15	101667951	101668426	0.445922	1.14243	1.35724	47502	47740	+	47740	CHSY1	4550	-0.64	down	2.12e-31	-0.47	down	1.78e-08	4.72677	4.28979	-0.139947
chr11	18405050	18405751	0.509625	2.28485	2.16459	10186	10536	+	10536	LDHA	2034	0.58	up	2.64e-20	-0.21	down	0.0428	6.82755	6.19984	-0.139137
chr16	78718037	78718576	0.509625	2.22472	2.12612	118460	118729	+	118729	AK022464	1174	0	no	NA	0	no	NA	4.58353	4.16454	-0.138302
chr6	86162234	86162677	0.254812	1.35287	2.40852	2408	2629	-	-2629	NT5E	3384	-0.37	down	5.39e-09	-0.03	down	0.882	3.6525	3.31911	-0.13809
chr3	8502956	8503256	0.668883	1.71364	1.35724	6384	6534	-	-6534	dJ271M21,3	372	0	no	NA	0	no	NA	4.20157	3.82011	-0.137317
chr2	120013285	120013931	0.509625	1.56332	1.61711	977	1300	-	-1300	STEAP3	378	-0.36	down	0.0376	-0.12	down	0.618	2.57824	2.34843	-0.134691
chr22	20907260	20907694	0.382219	1.413	1.88629	-124	93	-	-93	MED15	590	0.04	up	0.916	0.14	up	0.377	3.60476	3.2878	-0.132781
chr11	123108974	123109701	0.41407	1.98421	2.26062	9148	9511	+	9511	ENSG00000224741	256	0	no	NA	0	no	NA	1.88593	1.72218	-0.131043
chr1	8087458	8088060	0.254812	1.53326	2.58909	660	961	-	-961	ENSG00000238290	2085	-0.23	down	1	0.17	up	0.921	7.47211	6.82609	-0.130457
chr2	219151393	219151747	0.41407	1.0823	1.38615	-175	2	+	2	TMBIM1	2936	0.64	up	6.49e-33	0.41	up	1.55e-08	6.37398	5.8241	-0.130159
chr12	108699918	108700349	0.350367	1.47313	2.07194	570	785	+	785	AK054674	2482	0.45	up	0.778	0.95	up	0.896	7.5676	6.92003	-0.129059
chr10	92401894	92402302	0.477773	1.29275	1.43604	53257	53461	+	53461	AK025278	1855	0	no	NA	10000	up	0.752	1.02652	0.93937	-0.127996
chr2	121010231	121010589	0.605179	0.871852	0.52672	-175	4	+	4	RALB	2261	-0.09	down	0.363	-0.05	down	0.764	6.25461	5.73016	-0.126345
chr21	46783916	46784315	0.159258	0.841788	2.40209	11790	11990	+	11990	ENSG00000228930	192	-0.9	down	0.759	-0.19	down	1	6.49334	5.94935	-0.12623
chr6	169446503	169447092	0.541476	1.77377	1.71185	10766	11061	-	-11061	ENSG00000229720	934	-1.71	down	0.0305	-3.73	down	0.0103	2.45887	2.25449	-0.125198
chr1	182991463	182991993	0.318515	1.20255	1.91667	602	867	+	867	LAMC1	7889	-0.29	down	7.36e-05	0.14	up	0.224	7.87795	7.23315	-0.123195
chr10	75725877	75726251	0.127406	0.931979	2.87086	31621	31808	+	31808	VCL	3282	0.26	up	0.000145	0.93	up	5.36e-53	3.34216	3.06861	-0.123195
chr2	118979516	118980051	0.445922	1.89402	2.08659	35060	35327	-	-35327	LOC100506797	866	-2.44	down	0.0898	0	no	NA	0.716177	0.657559	-0.123195
chr1	212091101	212091552	0.254812	1.59338	2.64459	18040	18265	+	18265	ENSG00000233626	388	-0.3	down	1	-10000	down	0.4	1.90981	1.75349	-0.123195
chr19	30178326	30178810	0.477773	1.32281	1.46921	5026	5268	-	-5268	PLEKHF1	2202	-1.48	down	0.00693	-0.94	down	0.255	4.46417	4.10192	-0.122094
chr11	127896549	127897001	0.445922	1.11236	1.31876	84997	85223	-	-85223	ENSG00000254612	724	-0.18	down	0.215	0.08	up	0.764	3.50927	3.22517	-0.121794
chr9	109460014	109460792	0.541476	2.07441	1.93773	4151	4540	+	4540	ENSG00000234229	690	0	no	NA	0	no	NA	2.55436	2.34843	-0.121271
chr2	102080651	102081154	0.286664	1.38294	2.2703	2156	2408	+	2408	RFX8	459	-1.75	down	2.2e-07	-0.51	down	0.168	5.75329	5.29179	-0.120632
chr14	64108876	64109467	0.382219	1.14243	1.57963	286	581	-	-581	WDR89	3111	0.17	up	0.427	0.18	up	0.564	3.19892	2.94336	-0.120123
chr2	206525059	206525576	0.382219	1.47313	1.94641	21138	21396	+	21396	NRP2	1531	0.37	up	0.045	0.19	up	0.338	2.72147	2.50499	-0.119584
chr3	105084834	105085442	0.254812	1.65351	2.69803	162	466	+	466	ALCAM	2560	1.69	up	0	0.55	up	1.61e-16	6.56496	6.04328	-0.119453
chr9	80322637	80322978	0.350367	0.931979	1.41143	8024	8195	+	8195	GNAQ	6539	1.05	up	8.27e-138	0.81	up	2.4e-40	2.48275	2.2858	-0.119237
chr3	152314106	152314733	0.41407	1.44306	1.80119	51202	51515	+	51515	ENSG00000244545	487	0	no	NA	0	no	NA	0.883285	0.814121	-0.117636
chr1	27049932	27050485	0.286664	2.01428	2.81283	2570	2847	-	-2847	AK097147	2488	10000	up	1	-1.15	down	1	1.52784	1.40906	-0.116769
chr11	122078565	122079381	0.41407	1.77377	2.09887	4348	4756	-	-4756	MIR100HG	584	-0.42	down	1	10000	up	1	5.87265	5.41704	-0.116509
chr16	12156364	12156952	0.350367	1.50319	2.10109	948	1242	-	-1242	RUNDC2A/SNX29	2004	0.17	up	0.59	0.31	up	0.175	2.57824	2.37974	-0.115582
chr20	10742294	10742702	0.318515	1.47313	2.20945	3232	3436	+	3436	ENSG00000234900	729	10000	up	0.416	1.13	up	0.853	2.57824	2.37974	-0.115582
chr2	177355835	177356709	0.477773	2.46524	2.36733	14264	14701	+	14701	ENSG00000229434	495	0	no	NA	0	no	NA	3.2228	2.97467	-0.115582
chr2	110369319	110369865	0.0955546	1.56332	4.03214	1216	1489	+	1489	2010-09-01	272	0.14	up	0.731	0.36	up	0.175	2.33951	2.16055	-0.114808
chr1	85796050	85796626	0.318515	2.07441	2.70326	5484	5772	-	-5772	DDAH1	260	0.82	up	4.38e-22	0.74	up	9.4e-10	5.08486	4.69685	-0.114513
chr17	16120135	16120664	0.382219	0.841788	1.13906	-156	109	+	109	PIGL	1040	-0.15	down	0.473	0.04	up	0.94	4.84613	4.47767	-0.114087
chr22	24699419	24699929	0.668883	2.13453	1.6741	435	690	+	690	ADORA2A/SPECC1L	612	0.76	up	1.21e-07	0.33	up	0.105	1.05039	0.970683	-0.113858
chr1	157980467	157980876	0.191109	1.53326	3.00413	14464	14668	+	14668	LOC100505785/LOC100509900	587	10000	up	1	-10000	down	0.673	7.51986	6.95134	-0.113414
chr1	223894758	223895415	0.350367	1.44306	2.0422	4620	4948	+	4948	CAPN2	3573	0.27	up	6.91e-05	0.48	up	7.62e-12	3.72412	3.44436	-0.112665
chr1	87253870	87254885	0.605179	2.4953	2.04378	2720	3228	-	-3228	ENSG00000230721	555	-0.05	down	1	-0.72	down	0.633	1.86206	1.72218	-0.112665
chr11	101982620	101983129	0.350367	1.17249	1.74264	42	297	+	297	YAP1	4983	0.08	up	0.382	0	down	0.991	6.97079	6.45034	-0.111946
chr17	38488050	38488826	0.222961	1.59338	2.83723	8814	9202	+	9202	RARA	2008	-0.54	down	1.62e-13	-0.2	down	0.0655	6.25461	5.79278	-0.110664
chr20	48922201	48922798	0.191109	1.32281	2.79114	4450	4748	+	4748	ENSG00000233077	2250	1.04	up	0.175	0.94	up	0.244	6.99466	6.48166	-0.109892
chr6	106049348	106049876	0.382219	1.50319	1.97556	10666	10930	+	10930	ENSG00000237567	589	0	no	NA	0	no	NA	3.98672	3.69486	-0.109684
chr4	159731876	159732419	0.286664	1.47313	2.36145	4476	4748	-	-4748	FNIP2	5670	-0.22	down	0.0122	-0.34	down	0.00244	2.93633	2.72417	-0.108193
chr17	38706965	38708675	0.41407	2.94626	2.83094	1346	2201	+	2201	CCR7	2185	1.31	up	1.62e-05	-0.07	down	0.921	7.01853	6.51297	-0.107855
chr8	121792394	121792726	0.254812	1.20255	2.23859	3322	3488	-	-3488	ENSG00000248318	1973	0	no	NA	0	no	NA	2.6976	2.50499	-0.106873
chr22	39704612	39705191	0.41407	1.17249	1.50163	3696	3985	+	3985	RPL3	1192	0.07	up	0.358	-0.1	down	0.362	3.27054	3.0373	-0.106742
chr1	9858383	9858822	0.318515	0.841788	1.40209	24930	25150	-	-25150	CLSTN1	4178	-0.34	down	3.05e-07	-0.14	down	0.251	2.45887	2.2858	-0.105298
chr9	97695640	97696183	0.318515	1.20255	1.91667	-230	41	+	41	C9orf3	2396	-0.19	down	0.109	-0.72	down	9.18e-10	3.77187	3.50698	-0.105048
chr5	135343082	135343426	0.509625	1.38294	1.44023	21158	21330	+	21330	TGFBI	2805	-1.43	down	2.42e-69	-1.01	down	1.4e-33	4.10608	3.82011	-0.10415
chr2	164733781	164734177	0.382219	1.11236	1.54116	127698	127896	-	-127896	ENSG00000237844	714	0	no	NA	0	no	NA	1.4801	1.37774	-0.103387
chr2	11970051	11970890	0.382219	1.92409	2.3317	1534	1953	-	-1953	LOC100506457	940	2.43	up	0.568	-1.15	down	0.633	5.18035	4.8221	-0.103387
chr12	113660908	113661208	0.222961	0.931979	2.06351	1614	1764	-	-1764	TPCN1	2859	0.34	up	0.000613	0.63	up	4.47e-11	2.38726	2.22318	-0.102731
chr15	67175510	67176214	0.222961	1.95415	3.13168	101172	101524	-	-101524	SMAD6	1286	0.95	up	9.88e-32	0.45	up	0.00025	4.53579	4.22717	-0.101662
chr19	4066612	4067123	0.0318515	0.901915	4.82356	-204	52	-	-52	ZBTB7A	4441	-0.17	down	0.0708	0.04	up	0.759	11.0053	10.2704	-0.0996932
chr17	66694130	66694716	0.509625	1.23262	1.27422	96600	96893	-	-96893	FAM20A	2955	-1.06	down	1.49e-34	-1.22	down	6.26e-47	2.98407	2.7868	-0.0986731
chr2	163100889	163101537	0.382219	1.50319	1.97556	124	448	+	448	FAP	562	-0.88	down	1.37e-05	-0.39	down	0.0824	3.15118	2.94336	-0.0984275
chr21	30714861	30715372	0.41407	1.23262	1.57378	-218	38	+	38	BACH1/NCRNA00258	2303	-1.19	down	1.29e-41	-1.24	down	5.07e-37	3.15118	2.94336	-0.0984275
chr10	31025691	31026146	0.382219	0.901915	1.23859	13022	13249	-	-13249	ENSG00000230720	408	0	no	NA	0	no	NA	3.31829	3.09992	-0.0982067
chr5	76086478	76086992	0.222961	1.20255	2.43124	27766	28023	+	28023	F2RL1	607	-1.91	down	0.119	-0.26	down	0.889	3.6525	3.41305	-0.0978258
chr7	15790745	15791356	0.191109	1.32281	2.79114	49368	49673	-	-49673	ENSG00000235828	318	0	no	NA	0	no	NA	4.58353	4.28979	-0.0955527
chr1	12655961	12656879	0.159258	1.62345	3.34963	-360	99	-	-99	DHRS3	826	0.23	up	0.114	-0.2	down	0.208	5.08486	4.75948	-0.0954044
chr15	93346966	93347872	0.286664	2.1646	2.91667	6628	7081	-	-7081	ASB9P1	1625	-10000	down	0.38	10000	up	0.752	3.50927	3.2878	-0.0940491
chr4	159042339	159042790	0.350367	1.35287	1.94909	2836	3062	+	3062	FAM198B	4900	-3.54	down	0	-1.05	down	6.9e-67	2.0053	1.87874	-0.0940491
chr15	75959079	75959564	0.509625	1.92409	1.91667	4438	4680	-	-4680	SNX33	8008	0.04	up	0.472	-0.02	down	0.918	7.01853	6.57559	-0.0940491
chr7	137352245	137352901	0.382219	3.06651	3.00413	-309	19	-	-19	NAG20	1615	10000	up	1	0	no	NA	5.44295	5.10391	-0.0927841
chr12	64575329	64575826	0.382219	1.89402	2.30898	4266	4514	+	4514	C12orf66	2912	0.38	up	0.759	-0.39	down	0.321	3.96285	3.72617	-0.0888439
chr2	238188727	238189325	0.286664	1.71364	2.57963	22408	22707	-	-22707	ENSG00000224132	350	0	no	NA	-10000	down	0.4	7.75858	7.29578	-0.088732
chr5	150162980	150163453	0.350367	0.992107	1.50163	4658	4895	-	-4895	C5orf62	1519	-0.34	down	3.17e-07	-0.43	down	3.21e-09	4.55966	4.28979	-0.088019
chr20	48200108	48200718	0.477773	1.413	1.56436	15401	15706	-	-15706	PTGIS	5603	-0.38	down	5.42e-10	-0.04	down	0.926	6.01589	5.66753	-0.0860563
chr2	70016214	70016801	0.637031	1.26268	0.987056	-118	176	+	176	AK125871	4285	-1.35	down	0.327	-1.1	down	0.362	1.69495	1.59693	-0.0859441
chr11	19940594	19941175	0.318515	1.29275	2.021	12136	12427	+	12427	NAV2	570	2.57	up	8.89e-79	1.33	up	3.64e-05	3.3899	3.19386	-0.0859441
chr2	47261149	47261837	0.509625	2.01428	1.98276	-145	199	-	-199	TTC7A	753	-0.04	down	0.939	0.04	up	1	6.44559	6.07459	-0.085525
chr8	103819751	103820997	0.509625	1.62345	1.67155	-67	556	-	-556	FLJ45248	769	10000	up	1	-1.07	down	1	7.99731	7.54627	-0.0837502
chr3	21747190	21747751	0.382219	1.26268	1.72402	39822	40103	-	-40103	ZNF385D	1233	0.31	up	0.106	0.47	up	0.126	2.55436	2.41105	-0.0833027
chr12	127073339	127073842	0.509625	1.32281	1.3761	116008	116259	-	-116259	LOC100128554	2630	0	no	NA	0	no	NA	0.596814	0.563622	-0.0825535
chr3	36435695	36436001	0.286664	1.35287	2.23859	13518	13671	-	-13671	STAC	476	-2.32	down	8.03e-15	0.13	up	1	0.596814	0.563622	-0.0825535
chr19	3572347	3572732	0.573328	0.78166	0.447181	42	235	+	235	HMG20B	711	-0.17	down	0.314	0.14	up	0.44	5.46682	5.16654	-0.0815039
chr11	86451790	86452434	0.382219	1.65351	2.11306	13393	13715	-	-13715	ENSG00000255250	504	-10000	down	0.639	-0.61	down	1	5.46682	5.16654	-0.0815039
chr7	134377739	134378496	0.350367	2.10447	2.58652	4998	5376	-	-5376	ENSG00000224375	253	0	no	NA	0	no	NA	6.32623	5.98066	-0.081042
chr7	147109820	147110120	0.350367	2.01428	2.52332	112588	112738	-	-112738	CNTNAP2	2646	-0.97	down	0.00157	-0.08	down	0.959	4.10608	3.88273	-0.0806907
chr8	129188806	129189776	0.509625	3.45734	2.76216	75307	75792	-	-75792	PVT1	1901	-0.11	down	0.777	0.19	up	0.508	4.36868	4.13323	-0.079928
chr12	66025321	66025976	0.254812	2.43517	3.25652	10002	10330	+	10330	LOC100507065	693	0.6	up	0.925	0.26	up	0.98	6.3501	6.01197	-0.0789422
chr8	96805091	96805787	0.350367	2.43517	2.79708	16577	16925	+	16925	ENSG00000253773	456	10000	up	0.663	1.8	up	0.853	3.60476	3.41305	-0.0788427
chr4	26511626	26512355	0.477773	2.1646	2.1797	19542	19906	-	-19906	CCKAR	1482	-2.25	down	3e-210	-1.64	down	4.35e-68	3.43765	3.25648	-0.0781076
chr7	80263686	80264333	0.382219	3.75798	3.29749	1904	2228	+	2228	CD36	553	0	no	NA	0	no	NA	1.28912	1.22118	-0.0781076
chr8	60607080	60607748	0.222961	2.79594	3.64847	64858	65192	+	65192	ENSG00000253413	217	0	no	NA	0	no	NA	3.10343	2.94336	-0.0764012
chr4	158972400	158973135	0.350367	2.34498	2.74264	72490	72858	+	72858	FAM198B	4900	-3.54	down	0	-1.05	down	6.9e-67	3.36603	3.19386	-0.0757483
chr2	121297914	121298437	0.382219	1.71364	2.16459	2048	2309	+	2309	ENSG00000237614	528	-1.48	down	0.534	0.15	up	1	7.85407	7.45234	-0.0757483
chr2	69469642	69470366	0.477773	2.79594	2.54893	5093	5455	+	5455	ANTXR1	3979	0.29	up	1.79e-05	0.12	up	0.311	1.81432	1.72218	-0.0751901
chr5	151066611	151067021	0.445922	1.17249	1.39471	-115	90	-	-90	SPARC	3701	-0.38	down	5.36e-05	-0.12	down	0.618	5.44295	5.16654	-0.0751901
chr2	18158135	18159066	0.573328	2.4953	2.12178	29854	30320	-	-30320	AK095414	2699	0	no	NA	0	no	NA	3.46152	3.2878	-0.0742859
chr1	109968982	109969415	0.477773	1.0823	1.1797	-126	90	-	-90	PSMA5	3746	0.18	up	0.0385	0.26	up	0.0216	5.10873	4.85341	-0.0739649
chr3	23727387	23727701	0.668883	1.23262	0.881901	94103	94260	-	-94260	UBE2E2	2748	0.17	up	0.119	0.01	up	1	1.64721	1.56562	-0.0732905
chr11	48084914	48085587	0.0955546	1.38294	3.85527	18558	18894	-	-18894	PTPRJ	571	0.28	up	0.645	0.58	up	0.103	2.86471	2.72417	-0.0725694
chr16	88338110	88338476	0.254812	1.71364	2.74956	117584	117767	-	-117767	LOC100506735	3873	-1.21	down	4.28e-08	0.39	up	0.0919	4.79839	4.5716	-0.0698494
chr3	105625455	105626111	0.41407	1.77377	2.09887	37059	37387	-	-37387	CBLB	561	-1.14	down	2.21e-13	-0.75	down	2.81e-05	3.05569	2.91205	-0.0694635
chr1	18201053	18201731	0.286664	1.413	2.30133	47495	47834	-	-47834	ACTL8	1847	-10000	down	0.639	-0.11	down	1	6.20687	5.91803	-0.0687477
chr3	61585865	61586248	0.0637031	0.992107	3.96106	32226	32417	-	-32417	AK054828	1693	0.4	up	1	10000	up	0.752	0.262598	0.250499	-0.0680539
chr5	111296140	111296662	0.318515	1.53326	2.26716	8487	8748	+	8748	ENSG00000250095	411	0	no	NA	0	no	NA	2.62598	2.50499	-0.0680539
chr5	109624389	109624961	0.541476	1.53326	1.50163	-27	259	+	259	TMEM232	1622	1.1	up	1	10000	up	1	2.62598	2.50499	-0.0680539
chr22	36025856	36026329	0.222961	1.83389	3.04005	2820	3057	-	-3057	PVALB	852	0	no	NA	10000	up	0.53	3.67638	3.50698	-0.0680539
chr3	58036903	58037256	0.382219	1.71364	2.16459	25460	25637	+	25637	FLNB	5364	-0.86	down	1.11e-44	-0.3	down	0.000276	2.98407	2.84942	-0.0666119
chr20	48210570	48211459	0.159258	1.71364	3.42763	20954	21398	+	21398	LOC728671	565	0	no	NA	0	no	NA	8.45089	8.07858	-0.0650006
chr4	157397499	157397898	0.0955546	1.29275	3.75797	109234	109433	+	109433	ENSG00000251511	993	0	no	NA	0	no	NA	4.22544	4.03929	-0.0650006
chr9	110412432	110412993	0.286664	1.38294	2.2703	106534	106815	-	-106815	ENSG00000227350	466	10000	up	1	0	no	NA	2.81696	2.69286	-0.0650006
chr4	177805069	177805451	0.477773	1.35287	1.50163	3310	3501	-	-3501	ENSG00000250263	691	-10000	down	0.639	10000	up	0.36	3.17505	3.0373	-0.0639919
chr12	66285661	66286379	0.254812	4.29913	4.07654	9840	10199	-	-10199	LOC100129940	4675	0.79	up	2.08e-05	0.05	up	1	4.94162	4.72816	-0.0637045
chr20	30301073	30301526	0.222961	1.98421	3.15371	3102	3328	+	3328	ENSG00000236559	374	10000	up	1	10000	up	1	5.82491	5.5736	-0.0636262
chr18	32862279	32862776	0.286664	1.77377	2.62938	1448	1697	-	-1697	ZSCAN30	4382	0.01	up	0.988	-0.73	down	0.247	1.50397	1.44037	-0.0623402
chr22	28261930	28262567	0.350367	2.79594	2.99639	5326	5645	-	-5645	PITPNB	564	-0.34	down	0.0485	0.09	up	0.759	1.86206	1.7848	-0.0611345
chr12	120694845	120695366	0.477773	0.931979	0.963972	6888	7149	-	-7149	PXN	3800	0.35	up	3.22e-08	0.37	up	5.07e-06	2.57824	2.47368	-0.059729
chr13	45148010	45148624	0.605179	1.86396	1.62294	122	429	+	429	TSC22D1	2859	-0.2	down	0.00678	0.27	up	0.00175	2.93633	2.81811	-0.0592837
chr8	121396402	121396936	0.668883	2.73581	2.03214	3402	3669	-	-3669	MRPL13	703	0.22	up	0.355	0.07	up	0.765	1.33686	1.28381	-0.0584252
chr3	101659264	101659862	0.222961	1.65351	2.89067	-159	140	+	140	LOC152225	2051	-0.1	down	0.79	-0.68	down	0.673	4.55966	4.38373	-0.0567681
chr3	134076700	134077219	0.254812	1.56332	2.61711	160	420	+	420	AMOTL2	546	0.57	up	2.85e-15	0.52	up	2.99e-09	5.99201	5.76147	-0.0566039
chr10	70821058	70821624	0.477773	1.86396	1.96397	26204	26487	+	26487	SRGN	1106	0.86	up	1.02e-97	0.66	up	4.13e-29	5.10873	4.91604	-0.0554685
chr8	95113362	95113926	0.637031	1.65351	1.3761	2624	2906	+	2906	ENSG00000253585	668	-10000	down	0.639	10000	up	1	3.05569	2.94336	-0.0540334
chr3	11641852	11642446	0.318515	1.32281	2.05417	1020	1317	+	1317	VGLL4	586	-0.26	down	0.848	0.37	up	0.722	3.86736	3.72617	-0.0536545
chr2	208378530	208379051	0.318515	1.50319	2.23859	15410	15671	+	15671	CREB1	1173	-0.66	down	5.39e-06	0.08	up	0.749	3.15118	3.0373	-0.0531036
chr3	5094620	5095417	0.350367	1.86396	2.41143	14944	15343	+	15343	ENSG00000230182	369	0	no	NA	0	no	NA	4.05834	3.91404	-0.0522289
chr15	48987154	48987765	0.41407	1.413	1.77082	42370	42675	+	42675	CEP152	5469	0.38	up	0.0472	-0.54	down	0.012	4.60741	4.44635	-0.0513322
chr2	26101030	26101596	0.382219	2.40511	2.65363	-282	1	-	-1	ASXL2	7174	-0.14	down	0.117	0.06	up	0.837	5.87265	5.66753	-0.0512909
chr2	47284373	47284901	0.318515	1.26268	1.98706	3194	3458	+	3458	TTC7A	753	-0.04	down	0.939	0.04	up	1	8.40314	8.1099	-0.0512456
chrx	148535902	148536399	0.127406	1.11236	3.12612	999999999	999999999	?	1									1.26525	1.22118	-0.0511405
chr2	9427814	9428298	0.573328	1.50319	1.3906	9130	9372	+	9372	ASAP2	3272	-0.33	down	1.28e-05	-0.05	down	0.821	5.51456	5.3231	-0.0509804
chr2	240143825	240144327	0.254812	1.14243	2.16459	14038	14289	+	14289	HDAC4	995	-0.02	down	1	-0.49	down	0.477	4.91775	4.75948	-0.0471953
chr15	26076085	26076818	0.477773	2.43517	2.34963	9812	10179	+	10179	ATP10A	1186	1.03	up	4.41e-38	0.79	up	4.76e-18	6.15912	5.98066	-0.0424207
chr2	28325243	28325801	0.159258	2.43517	3.93459	45621	45900	+	45900	LOC100505736	2258	0	no	NA	10000	up	0.752	4.4403	4.3211	-0.0392566
chr16	55504466	55505091	0.222961	1.56332	2.80975	7792	8105	+	8105	MMP2	3741	-2.33	down	5.83e-210	-0.86	down	5.52e-26	4.08221	3.97667	-0.0377901
chr9	118706551	118707376	0.477773	4.14881	3.1183	19066	19478	-	-19478	C9orf27	769	0	no	NA	0	no	NA	5.10873	4.97866	-0.0372063
chr10	73620142	73620633	0.254812	0.992107	1.96106	9060	9306	-	-9306	PSAP	2822	-0.39	down	4.9e-10	-0.3	down	0.00146	2.60211	2.5363	-0.0369566
chr11	45110715	45111387	0.382219	1.65351	2.11306	4177	4513	+	4513	PRDM11	2229	0.42	up	0.338	0.14	up	0.889	4.36868	4.25848	-0.0368593
chr16	16090358	16090997	0.191109	1.50319	2.97556	9766	10085	+	10085	ABCC1	4563	0.57	up	1.25e-32	0.41	up	7.54e-08	3.62863	3.53829	-0.0363708
chr6	74290164	74290855	0.445922	1.68358	1.91667	9846	10191	-	-10191	ENSG00000229862	586	0	no	NA	0	no	NA	3.81961	3.72617	-0.0357326
chr12	2373975	2374876	0.445922	2.22472	2.31876	144112	144563	-	-144563	CACNA1C	981	-0.44	down	0.172	0.45	up	0.166	6.25461	6.10591	-0.034715
chr6	44205186	44205576	0.350367	1.05223	1.58652	1353	1548	-	-1548	HSP90AB1	3277	-0.28	down	2.75e-05	-0.2	down	0.036	4.22544	4.13323	-0.0318337
chr10	122856364	122856990	0.382219	1.80383	2.23859	35614	35927	+	35927	ENSG00000236762	588	-0.41	down	1	0.57	up	1	1.40848	1.37774	-0.0318337
chr2	47074426	47074826	0.41407	1.35287	1.70808	1411	1611	-	-1611	LOC388948/LOC100134259	2157	-1.14	down	2.34e-13	-2.39	down	2.14e-62	9.11932	8.92402	-0.031233
chr1	203595709	203596133	0.382219	0.962043	1.3317	-205	7	+	7	ATP2B4	8797	-1.08	down	2.96e-72	0.01	up	0.988	5.56231	5.44835	-0.0298649
chr3	171847516	171848311	0.350367	1.59338	2.18516	2752	3150	-	-3150	FNDC3B	678	-0.51	down	1.42e-08	-0.09	down	0.676	1.98142	1.94137	-0.0294654
chr13	75900661	75901201	0.541476	2.07441	1.93773	275	545	-	-545	TBC1D4	336	0.82	up	0.0834	0.33	up	0.585	2.1724	2.12924	-0.0289541
chr12	105096491	105096826	0.509625	1.17249	1.20207	54756	54923	+	54923	CHST11	1485	-1.45	down	9.05e-78	-0.83	down	5.71e-14	2.45887	2.41105	-0.0283363
chr9	21657120	21657707	0.445922	1.71364	1.9422	18472	18766	-	-18766	ENSG00000227443	305	0	no	NA	0	no	NA	2.64986	2.59892	-0.0279987
chr11	9809366	9810131	0.350367	1.89402	2.43451	-154	228	-	-228	SBF2	2117	0.12	up	0.381	-0.02	down	1	4.36868	4.28979	-0.02629
chr16	15684740	15685151	0.127406	1.68358	3.72402	2624	2830	-	-2830	C16orf45	2050	0.34	up	4.36e-06	0.26	up	0.00758	1.81432	1.7848	-0.0236598
chr5	36450639	36451271	0.222961	1.98421	3.15371	137337	137653	+	137653	ENSG00000242292	156	0	no	NA	0	no	NA	1.52784	1.50299	-0.0236598
chr18	59400636	59401076	0.254812	1.32281	2.3761	14333	14553	+	14553	AK054836	2206	0	no	NA	10000	up	1	1.71882	1.69087	-0.0236598
chr1	63248109	63248589	0.254812	1.11236	2.12612	923	1163	+	1163	ATG4C	2936	0.68	up	7.51e-07	0.13	up	0.673	0.859412	0.845433	-0.0236598
chr8	81142951	81143401	0.605179	0.992107	0.713133	6	231	+	231	TPD52	462	0	no	NA	10000	up	1	0.954903	0.93937	-0.0236598
chr4	54931845	54932376	0.286664	2.07441	2.85527	988	1253	-	-1253	CHIC2	1194	-0.71	down	6.95e-29	-0.15	down	0.279	5.72942	5.63622	-0.0236598
chr2	101358526	101359790	0.286664	3.2469	3.50163	19182	19814	-	-19814	ENSG00000228488	238	0	no	NA	0	no	NA	2.9602	2.91205	-0.0236598
chrx	150994497	150995104	0.127406	2.04434	4.00413	999999999	999999999	?	1									1.24137	1.22118	-0.0236598
chr10	53149504	53150141	0.159258	1.65351	3.3761	62328	62646	-	-62646	AK021709	1966	0	no	NA	0	no	NA	1.24137	1.22118	-0.0236598
chr10	81158999	81159564	0.254812	1.44306	2.50163	9466	9748	+	9748	ENSG00000235426	506	0.56	up	0.00361	0.03	up	0.872	4.89388	4.8221	-0.0213158
chr9	112555394	112555833	0.382219	1.26268	1.72402	12658	12878	-	-12878	AKAP2	4718	-0.04	down	0.663	0.09	up	0.502	2.60211	2.56761	-0.0192546
chr11	65188401	65189149	0.254812	1.98421	2.96106	1120	1494	+	1494	NEAT1	3735	-0.42	down	7.5e-17	0.19	up	0.121	7.23339	7.13921	-0.0189062
chr1	8271923	8272525	0.350367	1.65351	2.23859	2745	3046	+	3046	ENSG00000227634	497	10000	up	0.416	10000	up	1	5.89652	5.8241	-0.0178307
chr7	47835176	47835606	0.286664	0.841788	1.5541	154	369	-	-369	C7orf69/PKD1L1	648	0.54	up	0.902	0.55	up	0.838	1.93368	1.91005	-0.0177349
chr10	14116402	14116801	0.350367	1.44306	2.0422	120	319	-	-319	ENSG00000235410	790	-10000	down	0.38	-1.57	down	0.799	2.91245	2.88074	-0.0157977
chr5	133774749	133775240	0.382219	1.71364	2.16459	2346	2592	-	-2592	ENSG00000250994	714	-0.3	down	1	0	no	NA	5.44295	5.38572	-0.0152475
chr5	121429294	121429933	0.0318515	1.92409	5.91667	15240	15559	-	-15559	LOX	5177	0.22	up	0.00779	0.34	up	0.0012	3.31829	3.2878	-0.0133178
chr19	38826121	38826558	0.382219	0.871852	1.18968	-144	75	+	75	CATSPERG	3626	2.75	up	2.06e-05	1.54	up	0.247	3.31829	3.2878	-0.0133178
chr12	90127287	90127972	0.286664	1.7437	2.60472	21558	21901	-	-21901	LOC338758	2998	-1.17	down	0.000182	-0.41	down	0.179	2.93633	2.91205	-0.011978
chr2	33377883	33378559	0.41407	4.35926	3.39614	18159	18497	-	-18497	LTBP1	5087	-0.17	down	0.0126	0.51	up	1.04e-13	1.86206	1.84743	-0.0113814
chr16	78539438	78540261	0.509625	1.65351	1.69803	72786	73198	-	-73198	WWOX	453	0.63	up	0.316	-0.02	down	1	3.72412	3.69486	-0.0113814
chr13	111013517	111014178	0.700734	2.4953	1.83227	32622	32952	-	-32952	COL4A2	585	0.08	up	0.355	-0.2	down	0.0369	3.15118	3.13123	-0.00916021
chr11	33712260	33712601	0.286664	1.80383	2.65363	5646	5817	+	5817	ENSG00000255202	648	-1.05	down	0.0806	-0.75	down	0.713	5.9204	5.88672	-0.00822974
chr8	38895456	38896041	0.318515	1.56332	2.29518	16224	16516	-	-16516	ADAM9	516	0.04	up	0.961	0.26	up	0.0066	3.55701	3.53829	-0.00761184
chr5	68745990	68746321	0.0955546	0.841788	3.13906	5834	5999	-	-5999	MARVELD2	4376	-0.29	down	0.839	0.03	up	1	0.692304	0.688872	-0.00717165
chr1	59616737	59617076	0.477773	1.29275	1.43604	4258	4427	-	-4427	LOC729467	1043	0	no	NA	0	no	NA	3.46152	3.44436	-0.00717165
chr6	21033763	21034326	0.509625	1.413	1.47126	31024	31306	+	31306	CDKAL1	1727	0.33	up	0.108	-0.43	down	0.134	2.57824	2.56761	-0.00595778
chr4	95333809	95334276	0.477773	1.32281	1.46921	38762	38995	+	38995	PDLIM5	1186	-0.17	down	0.101	0.82	up	2.97e-20	3.17505	3.16255	-0.00569323
chr14	68674706	68675351	0.41407	2.04434	2.30369	130094	130417	+	130417	ENSG00000240210	801	10000	up	1	10000	up	1	2.48275	2.47368	-0.00528125
chr9	137494299	137494701	0.254812	1.59338	2.64459	17263	17464	-	-17464	ENSG00000234960	2398	-2.31	down	0.354	-1.07	down	1	4.77451	4.75948	-0.00455095
chr2	69404294	69404873	0.477773	1.53326	1.6822	4604	4894	-	-4894	ANTXR1	1384	-0.19	down	0.0231	0	down	0.941	5.37133	5.35441	-0.00455095
chr17	64463030	64463560	0.382219	1.47313	1.94641	25750	26015	-	-26015	AK129693	2544	0	no	NA	0	no	NA	2.38726	2.37974	-0.00455095
chr2	218868623	218869162	0.191109	1.26268	2.72402	904	1174	-	-1174	TNS1	2467	-0.05	down	0.759	0.3	up	0.0039	7.5676	7.54627	-0.00407197
chr1	201682527	201683086	0.318515	1.53326	2.26716	9336	9616	+	9616	ENSG00000235121	1809	1.02	up	0.639	10000	up	1	6.97079	6.95134	-0.00403097
chr3	112390800	112391326	0.286664	1.71364	2.57963	22423	22686	-	-22686	CCDC80	684	-0.54	down	9.08e-18	-0.41	down	1.18e-06	4.58353	4.5716	-0.00376022
chr9	114812771	114813356	0.318515	2.52536	2.98706	6990	7282	+	7282	SUSD1	700	-0.11	down	0.859	-0.02	down	0.967	3.3899	3.38173	-0.0034819
chr15	61519435	61519966	0.254812	1.11236	2.12612	140860	141125	-	-141125	AK021439	1530	0	no	NA	0	no	NA	2.79309	2.7868	-0.00325357
chr12	66042746	66043276	0.254812	1.86396	2.87086	2508	2773	-	-2773	ENSG00000213344	472	0.1	up	1	1.07	up	0.0359	3.89123	3.88273	-0.00315412
chr7	18906109	18906702	0.477773	1.68358	1.81713	15086	15383	-	-15383	HDAC9	860	0.18	up	0.969	0.97	up	0.127	1.09814	1.09593	-0.00290122
chr11	9786945	9787551	0.318515	1.47313	2.20945	1208	1511	-	-1511	LOC440028	711	0.65	up	0.581	0.42	up	0.752	7.59148	7.57759	-0.002642
chr8	69671817	69672551	0.382219	3.30702	3.11306	27297	27664	+	27664	C8orf34	464	2.24	up	1.31e-13	0.98	up	0.0291	4.29706	4.28979	-0.00244329
chr9	5627161	5627601	0.318515	1.38294	2.1183	1519	1739	+	1739	KIAA1432	3812	0.18	up	0.105	0.21	up	0.0396	2.10079	2.09793	-0.00196471
chr2	119425849	119426623	0.222961	1.65351	2.89067	173124	173511	+	173511	EN1	2962	-0.16	down	0.302	-0.15	down	0.557	3.10343	3.09992	-0.00163347
chrx	38798426	38798737	0.254812	0.931979	1.87086	999999999	999999999	?	1									0.501324	0.500997	-0.000939701
chr2	238130748	238131332	0.286664	1.413	2.30133	9247	9539	+	9539	ENSG00000224132	592	0	no	NA	-10000	down	0.4	4.01059	4.00798	-0.000939701
chr11	121466459	121466957	0.445922	1.05223	1.23859	4914	5163	-	-5163	SORL1	2670	-2.97	down	0.14	-10000	down	0.221	4.22544	4.22717	0.000587769
chr2	208028032	208028632	0.0955546	1.50319	3.97556	1663	1963	+	1963	KLF7	539	-0.9	down	6.74e-09	-0.06	down	1	4.53579	4.54029	0.0014312
chr9	137299036	137299505	0.700734	0.841788	0.26459	608	842	-	-842	RXRA	2421	0.24	up	0.00881	0.22	up	0.0505	6.183	6.19984	0.00392605
chr10	91091808	91092470	0.637031	2.13453	1.74449	-231	100	+	100	IFIT3	2454	-2.12	down	4.89e-174	-1.85	down	6.83e-64	1.93368	1.94137	0.00572403
chr8	97350192	97350800	0.445922	1.62345	1.8642	969	1273	-	-1273	PTDSS1	5177	0.39	up	2.06e-08	0.11	up	0.359	3.67638	3.69486	0.00723423
chr18	8945956	8946664	0.350367	1.62345	2.21212	73355	73709	+	73709	ENSG00000242058	747	0	no	NA	-1.32	down	0.799	3.67638	3.69486	0.00723423
chr16	28503148	28503666	0.541476	0.992107	0.873598	-255	4	-	-4	CLN3	1877	0.03	up	0.776	0.11	up	0.579	5.41907	5.44835	0.00777273
chr11	131934859	131935326	0.445922	3.06651	2.78174	75580	75813	+	75813	NTM	827	-1.18	down	1.22e-70	-0.86	down	1.62e-31	5.63393	5.66753	0.00858056
chr10	33562102	33562681	0.318515	1.62345	2.34963	2026	2315	-	-2315	NRP1	2572	-1.44	down	3.38e-259	-0.53	down	3.81e-14	4.82226	4.85341	0.00929064
chr9	112507851	112508526	0.605179	1.35287	1.16059	14114	14452	+	14452	ENSG00000232939	478	0	no	NA	0	no	NA	1.64721	1.65955	0.0107737
chr17	25553671	25554072	0.350367	0.931979	1.41143	10812	11013	+	11013	LOC100506418	611	0	no	NA	0	no	NA	0.310343	0.313123	0.0128661
chr6	35320451	35320914	0.254812	0.78166	1.61711	3690	3921	-	-3921	LOC100507672/LOC100509629	648	-0.59	down	0.482	0.05	up	1	0.310343	0.313123	0.0128661
chr2	106026096	106026660	0.41407	1.413	1.77082	9972	10254	-	-10254	FHL2	4881	0.2	up	0.00189	0.22	up	0.0121	4.55966	4.60291	0.0136212
chr19	8426732	8427383	0.41407	1.20255	1.53815	728	1054	+	1054	ANGPTL4	1578	1.83	up	1.33e-281	1.68	up	2.04e-151	2.38726	2.41105	0.0143081
chr22	41940503	41940934	0.668883	1.02217	0.611812	-108	108	-	-108	POLR3H	802	0.09	up	0.596	0.32	up	0.0357	3.53314	3.56961	0.0148144
chr11	113545775	113546276	0.41407	1.7437	2.07421	1846	2096	-	-2096	AK022803	2672	0	no	NA	0	no	NA	2.91245	2.94336	0.0152292
chr7	73670886	73671253	0.350367	1.02217	1.5447	2148	2332	-	-2332	RFC2	1592	0.57	up	1.19e-06	-0.33	down	0.0267	1.45623	1.47168	0.0152292
chr12	57530121	57530795	0.222961	1.50319	2.75317	7238	7575	-	-7575	STAT6	2924	0.12	up	0.0867	0.19	up	0.0531	6.03976	6.10591	0.0157145
chr5	122758959	122759842	0.668883	2.28485	1.77228	-328	114	-	-114	CEP120	4711	-0.23	down	0.043	-0.25	down	0.0617	4.27319	4.3211	0.0160864
chr4	125857475	125857936	0.700734	1.38294	0.980797	222946	223177	-	-223177	ANKRD50	1509	-0.15	down	0.451	0.59	up	0.0173	0.83554	0.845433	0.0169822
chr10	3149364	3149999	0.382219	1.14243	1.57963	-60	257	-	-257	PFKP	552	-0.3	down	0.0189	-0.83	down	5.78e-14	3.98672	4.03929	0.0189007
chr18	2857389	2858095	0.700734	1.7437	1.31522	10361	10714	-	-10714	EMILIN2	1697	0.69	up	3.72e-05	0.55	up	0.0529	1.57559	1.59693	0.0194089
chr16	24681815	24682361	0.732586	1.32281	0.852536	22	295	+	295	FLJ45256	2907	-10000	down	0.639	0	no	NA	2.0053	2.0353	0.0214281
chr16	70611079	70611631	0.254812	1.44306	2.50163	-60	216	+	216	SF3B3	9720	-0.22	down	0.00738	-0.15	down	0.132	2.9602	3.00598	0.0221439
chr3	160787696	160788002	0.541476	1.35287	1.32106	52	205	-	-205	PPM1L	1449	0.83	up	0.656	1.56	up	0.134	3.17505	3.22517	0.0225958
chr3	190251333	190251866	0.0955546	1.35287	3.82356	12984	13251	-	-13251	C3orf13	315	0	no	NA	-10000	down	0.673	5.29971	5.38572	0.0232266
chr15	39607343	39607726	0.445922	2.91619	2.70922	31068	31260	-	-31260	LOC644766	2610	0	no	NA	0	no	NA	2.33951	2.37974	0.0245954
chr2	159992111	159993072	0.445922	4.44945	3.31876	-362	118	+	118	TANC1	1736	-0.65	down	0.0973	0.53	up	0.0653	3.50927	3.56961	0.0245954
chr11	86459340	86459844	0.477773	1.98421	2.05417	16463	16715	+	16715	ENSG00000255250	504	-10000	down	0.639	-0.61	down	1	4.67902	4.75948	0.0245954
chr20	33893533	33894026	0.41407	1.80383	2.12312	86	332	+	332	UQCC	1001	-0.03	down	0.827	0.01	up	1	8.618	8.76746	0.0248057
chr6	56668306	56668674	0.286664	1.0823	1.91667	17629	17813	-	-17813	DST	565	-0.25	down	0.651	0.5	up	0.342	2.55436	2.59892	0.0249502
chr20	17891424	17891933	0.191109	1.02217	2.41917	22620	22874	-	-22874	ENSG00000233625	632	0	no	NA	0	no	NA	1.59946	1.62824	0.0257282
chr19	4870054	4870602	0.0637031	1.47313	4.53138	2274	2548	-	-2548	PLIN3	2337	-0.17	down	0.0167	-0.19	down	0.0361	2.45887	2.50499	0.0268053
chr7	119692908	119693379	0.445922	1.62345	1.8642	87690	87926	+	87926	ENSG00000233417	469	0	no	NA	0	no	NA	2.88858	2.94336	0.0271033
chr1	101703002	101703484	0.382219	1.05223	1.46099	-140	101	-	-101	S1PR1	2874	0.81	up	5.91e-16	0.54	up	3.8e-05	3.10343	3.16255	0.0272214
chr1	78004481	78005807	0.445922	2.19466	2.29914	374	1037	+	1037	AK5	324	-2.56	down	3.3e-05	0.08	up	0.889	4.08221	4.16454	0.0288076
chr13	28130284	28130760	0.509625	1.14243	1.16459	2880	3118	-	-3118	LNX2	1316	0.16	up	0.449	0	up	0.921	0.214853	0.219186	0.0288076
chr2	161224234	161224903	0.127406	2.31492	4.18345	-298	36	+	36	RBMS1	1674	0.29	up	0.0077	0.5	up	2.41e-06	1.50397	1.5343	0.0288076
chr1	10487964	10488508	0.477773	1.29275	1.43604	1651	1923	+	1923	CORT	1319	0.33	up	0.0711	-0.26	down	0.645	0.214853	0.219186	0.0288076
chr4	22669878	22670394	0.541476	1.59338	1.55712	24154	24412	+	24412	GBA3	1226	0	no	NA	0	no	NA	1.28912	1.31512	0.0288076
chr12	52674026	52674626	0.445922	2.13453	2.25906	5071	5371	+	5371	KRT81	1911	-1.41	down	0.0141	-2	down	3.55e-10	6.25461	6.38772	0.0303801
chr3	55194476	55195126	0.509625	2.31492	2.18345	5812	6137	+	6137	ENSG00000239991	429	0	no	NA	0	no	NA	5.3952	5.51097	0.0306304
chr9	21549161	21550020	0.286664	2.61555	3.18968	9648	10078	+	10078	LOC554202	745	-1.32	down	1.37e-14	-0.95	down	1.25e-06	2.26789	2.31711	0.0309755
chr6	90995154	90995781	0.286664	1.47313	2.36145	10680	10993	+	10993	BACH2	9113	-1.11	down	0.00469	-1.99	down	8.76e-07	1.40848	1.44037	0.0322966
chr12	63124335	63124912	0.159258	1.50319	3.23859	24094	24383	+	24383	ENSG00000213352	1007	-0.51	down	0.0117	-0.18	down	0.817	3.70025	3.78879	0.0341166
chr5	35924144	35924616	0.318515	1.0823	1.76466	14121	14357	+	14357	CAPSL	972	-2.33	down	0.0571	-1.32	down	0.511	2.72147	2.7868	0.0342211
chr12	13500258	13500688	0.286664	1.20255	2.06867	22917	23132	+	23132	C12orf36	3202	0	no	NA	-10000	down	0.673	1.7427	1.7848	0.0344432
chr6	53918939	53919376	0.350367	2.13453	2.60698	6548	6766	-	-6766	ENSG00000235050	544	0	no	NA	0	no	NA	2.50662	2.56761	0.0346842
chr12	58960397	58960911	0.159258	1.413	3.14933	654	911	-	-911	AK093124	1975	-1.86	down	0.535	0.68	up	0.746	2.29177	2.34843	0.0352339
chr2	12460913	12461806	0.350367	2.52536	2.84955	6470	6917	-	-6917	LOC100506457	578	0	no	NA	0	no	NA	2.84084	2.91205	0.0357188
chr6	155594519	155595006	0.41407	1.38294	1.73979	2676	2920	+	2920	CLDN20	1209	-0.88	down	0.814	1.17	up	0.852	3.17505	3.25648	0.036535
chr22	27566330	27567044	0.41407	1.92409	2.21623	10490	10847	-	-10847	ENSG00000231405	473	0	no	NA	-10000	down	0.673	2.41113	2.47368	0.036947
chr9	127888003	127888832	0.191109	1.98421	3.3761	1420	1835	-	-1835	ENSG00000230396	883	0	no	NA	0	no	NA	1.64721	1.69087	0.0377408
chr11	61738795	61739700	0.286664	2.19466	2.93657	1834	2286	-	-2286	LOC399900	1645	1.22	up	0.311	-0.56	down	0.809	5.94427	6.10591	0.0387061
chr6	1200509	1201451	0.445922	2.34498	2.39471	95328	95799	-	-95799	ENSG00000176515	3435	-1.68	down	0.535	-10000	down	0.673	6.85143	7.04528	0.040252
chr15	34516955	34517348	0.605179	1.0823	0.838664	-134	62	+	62	TMEM85	852	-0.04	down	0.729	0.15	up	0.244	3.10343	3.19386	0.0414353
chr5	135393781	135394643	0.382219	1.95415	2.35407	-187	244	+	244	TGFBI	588	-1.39	down	1.91e-123	-1.01	down	1.84e-74	3.10343	3.19386	0.0414353
chr9	111798328	111798740	0.127406	0.992107	2.96106	28	234	-	-234	C9orf5	555	0.3	up	0.162	0.16	up	0.559	1.88593	1.94137	0.0417933
chr1	39727326	39727809	0.382219	0.992107	1.3761	1114	1356	-	-1356	MACF1/KIAA0754	642	-0.79	down	0.0958	0.34	up	0.771	0.668432	0.688872	0.0434544
chr4	81018877	81019346	0.222961	1.05223	2.23859	-228	7	+	7	ANTXR2	503	-0.9	down	7.59e-07	-0.62	down	0.0103	1.67108	1.72218	0.0434544
chr1	150585768	150586395	0.318515	1.71364	2.42763	1294	1607	-	-1607	AK124918	1859	0.35	up	0.977	-0.96	down	0.272	3.00794	3.09992	0.0434544
chr2	43150141	43150660	0.350367	1.26268	1.84955	77802	78062	+	78062	ENSG00000224739	400	0	no	NA	0	no	NA	7.71084	7.95334	0.0446721
chr17	39216452	39216965	0.159258	1.0823	2.76466	86	342	-	-342	LOC730755	875	-1.03	down	4.46e-19	-0.83	down	3.83e-11	4.24932	4.38373	0.0449273
chr5	54056925	54057601	0.573328	2.22472	1.95619	46437	46775	+	46775	ENSG00000232517	7000	0.04	up	0.932	0.4	up	0.855	3.48539	3.60092	0.0470432
chr22	25387774	25388078	0.222961	0.78166	1.80975	33522	33674	+	33674	KIAA1671	5940	0.12	up	0.319	0.24	up	0.0272	4.75064	4.91604	0.0493739
chr11	66738137	66738837	0.509625	2.34498	2.20207	3911	4261	+	4261	C11orf86	1187	-10000	down	0.38	10000	up	1	5.6578	5.85541	0.0495289
chr2	45139722	45140376	0.509625	1.413	1.47126	6956	7283	+	7283	LOC100130502/LOC100506088	2275	0	no	NA	0	no	NA	0.907158	0.93937	0.0503408
chr10	28012307	28012827	0.254812	1.38294	2.44023	4815	5075	-	-5075	MKX	818	0.83	up	9.38e-09	0.15	up	1	3.17505	3.2878	0.0503408
chr1	201735217	201735870	0.254812	1.80383	2.82356	13784	14110	+	14110	NAV1	2260	-0.42	down	4.18e-09	-0.03	down	0.777	1.81432	1.87874	0.0503408
chr13	52217111	52218523	0.254812	4.35926	4.09658	16207	16913	+	16913	WDFY2	1068	-0.68	down	1.09e-05	0.43	up	0.00657	2.9602	3.06861	0.0518913
chr6	39850330	39850826	0.318515	2.22472	2.80419	466	714	+	714	MOCS1	3053	0.59	up	0.224	0.54	up	0.141	5.46682	5.66753	0.0520198
chr20	30084775	30085180	0.445922	1.02217	1.19677	9398	9601	-	-9601	NCRNA00028	587	-1.37	down	0.627	0.25	up	1	4.10608	4.25848	0.0525758
chr4	53885957	53886479	0.668883	1.14243	0.772276	61703	61964	-	-61964	LOC100506387	2465	-10000	down	0.639	-0.07	down	1	2.1724	2.25449	0.0535081
chr8	38264056	38264659	0.350367	1.83389	2.38797	52	353	-	-353	LETM2	986	0.35	up	0.42	-0.42	down	0.711	3.89123	4.03929	0.0538768
chr1	12203863	12204201	0.191109	1.11236	2.54116	63	232	+	232	TNFRSF8	2120	-10000	down	0.639	-10000	down	0.673	3.9151	4.0706	0.0561935
chr11	45167088	45167505	0.477773	0.901915	0.916666	690	898	+	898	PRDM11	1868	0.05	up	0.749	0.41	up	0.249	3.58089	3.72617	0.0573768
chr2	204549711	204550551	0.605179	3.06651	2.34116	12565	12985	-	-12985	ENSG00000233031	249	0	no	NA	0	no	NA	5.89652	6.13722	0.0577203
chr19	45245095	45245418	0.191109	0.78166	2.03214	5544	5706	+	5706	BCL3	1714	-1.28	down	7.5e-55	-1.12	down	1.11e-27	4.51192	4.69685	0.057954
chr7	22898414	22898876	0.318515	2.4953	2.96978	230	461	+	461	ENSG00000228649	997	-1.47	down	0.0226	-0.86	down	0.201	3.48539	3.63223	0.0595342
chr11	43942146	43942806	0.445922	1.86396	2.06351	-330	0	-	0	LOC100507300	1909	1.33	up	1	0	no	NA	1.05039	1.09593	0.0612291
chr15	51401048	51401942	0.509625	2.79594	2.45583	3575	4022	-	-4022	TNFAIP8L3	2259	1.36	up	2.18e-88	1.07	up	1.75e-36	4.32093	4.50898	0.0614568
chr1	234859536	234860676	0.254812	2.97632	3.54602	-253	317	-	-317	LOC100506810	3793	0.94	up	0.776	-10000	down	0.4	5.49069	5.73016	0.0615875
chr1	55909090	55909659	0.191109	1.44306	2.91667	70056	70341	-	-70341	ENSG00000232198	653	0	no	NA	0	no	NA	4.79839	5.00997	0.0622541
chr1	8176923	8177626	0.286664	1.98421	2.79114	5136	5488	+	5488	ENSG00000238290	2044	-0.23	down	1	0.17	up	0.921	3.74799	3.91404	0.0625413
chr7	80351126	80351768	0.222961	1.50319	2.75317	20086	20407	+	20407	SEMA3C	5174	-0.64	down	1.56e-35	-0.81	down	1e-49	3.74799	3.91404	0.0625413
chr9	21688072	21688712	0.191109	1.92409	3.3317	6463	6783	+	6783	ENSG00000229835	1774	-0.03	down	1	-0.3	down	0.207	2.93633	3.06861	0.0635731
chr8	38384698	38386069	0.318515	2.64562	3.05417	106	791	+	791	C8orf86	1527	0	no	NA	0	no	NA	3.41378	3.56961	0.0643964
chr3	145995548	145996200	0.350367	2.40511	2.77916	26582	26908	-	-26908	PLSCR4	3037	1.05	up	8.53e-56	0.89	up	1.36e-20	1.76657	1.84743	0.0645674
chr6	130030427	130031576	0.732586	3.39721	2.21328	-206	368	+	368	ARHGAP18/C6orf191	1487	0.35	up	0.00359	0.71	up	9.36e-08	3.6525	3.82011	0.0647272
chr7	107612486	107612996	0.573328	1.92409	1.74674	447	702	+	702	LAMB1	677	-0.87	down	1.19e-30	-0.49	down	2.6e-08	1.88593	1.97268	0.0648769
chr6	138914376	138914910	0.41407	1.62345	1.97111	20708	20975	-	-20975	NHSL1	7491	0.49	up	6.85e-05	0.26	up	0.221	3.19892	3.35042	0.0667555
chr4	7971225	7971727	0.350367	1.11236	1.66669	2508	2759	-	-2759	ABLIM2	1673	6.53	up	2.54e-44	-0.68	down	0.926	4.51192	4.72816	0.06754
chr1	64127717	64128426	0.41407	2.34498	2.50163	1188	1543	+	1543	ROR1	1439	-1.16	down	2.93e-20	0.57	up	0.000221	7.25726	7.6089	0.0682627
chrx	109330661	109331254	0.127406	1.98421	3.96106	999999999	999999999	?	1									1.79044	1.87874	0.0694496
chr17	30023131	30023653	0.509625	1.44306	1.50163	120453	120714	-	-120714	ENSG00000228768	459	-10000	down	0.38	-0.53	down	1	4.53579	4.75948	0.0694496
chr13	111357141	111357538	0.350367	1.14243	1.70516	330	528	+	528	CARS2	756	-0.44	down	0.231	-0.03	down	0.894	3.70025	3.88273	0.0694496
chr6	82639584	82640051	0.382219	1.65351	2.11306	3146	3379	+	3379	LOC100506867	822	-0.28	down	0.943	-0.44	down	0.827	1.19363	1.25249	0.0694496
chr1	55894592	55895476	0.222961	2.07441	3.21784	55559	56001	-	-56001	ENSG00000232198	653	0	no	NA	0	no	NA	5.51456	5.79278	0.0710101
chr22	25371696	25372376	0.254812	1.65351	2.69803	29034	29374	-	-29374	TMEM211	866	0	no	NA	0	no	NA	5.27584	5.54228	0.0710807
chr2	235588563	235589128	0.286664	1.86396	2.70094	153830	154113	+	154113	ENSG00000235726	468	0	no	NA	0	no	NA	2.88858	3.0373	0.0724273
chr8	119808863	119809301	0.191109	2.10447	3.46099	34423	34642	-	-34642	ENSG00000242206	346	-10000	down	0.639	-10000	down	0.673	2.88858	3.0373	0.0724273
chr17	43384764	43385064	0.382219	0.751596	0.97556	448	598	-	-598	AK057594	1842	-10000	down	0.639	10000	up	1	2.53049	2.66155	0.0728482
chr12	91534018	91534702	0.254812	3.72792	3.87086	4333	4675	+	4675	DCN	1206	1.59	up	4e-306	0.7	up	5.94e-22	2.41113	2.5363	0.0730162
chr22	19983023	19983383	0.445922	1.05223	1.23859	4706	4886	-	-4886	ARVCF	2871	-0.33	down	0.0101	-0.42	down	0.00213	6.99466	7.3584	0.0731378
chr15	70766920	70767674	0.41407	2.4953	2.59127	48061	48438	-	-48438	LOC283674	1574	10000	up	1	0	no	NA	4.36868	4.60291	0.0753502
chr18	43382642	43383603	0.350367	5.20105	3.89186	21942	22423	+	22423	SIGLEC15	1506	-0.84	down	0.000559	-0.63	down	0.0237	5.70554	6.01197	0.0754734
chr1	183239865	183240251	0.318515	1.50319	2.23859	3445	3638	-	-3638	ENSG00000233562	684	0	no	NA	0	no	NA	4.24932	4.47767	0.0755156
chr8	120595490	120595889	0.445922	1.17249	1.39471	402	601	+	601	ENPP2	1725	0.03	up	0.815	-0.99	down	7.42e-24	2.55436	2.69286	0.0761755
chr12	109900196	109900644	0.350367	1.38294	1.9808	2056	2280	+	2280	KCTD10	1030	-0.18	down	0.0526	0.5	up	2.99e-09	6.58883	6.95134	0.0772691
chr6	34358656	34359235	0.445922	1.95415	2.13168	1124	1413	+	1413	RPS10	739	-0.36	down	0.00265	0.2	up	0.27	4.65515	4.91604	0.0786682
chr5	118713975	118714473	0.573328	1.14243	0.994669	5942	6191	-	-6191	AK024940	2089	0	no	NA	0	no	NA	1.83819	1.94137	0.0787875
chr3	134053351	134053723	0.382219	1.23262	1.68926	12407	12593	+	12593	AK026713	1946	1.33	up	1	-0.61	down	1	6.89917	7.29578	0.0806382
chr2	150850975	150851351	0.700734	1.32281	0.916666	135270	135458	-	-135458	FLJ32955	1832	0	no	NA	0	no	NA	1.4801	1.56562	0.0810376
chr6	106047632	106048062	0.222961	1.14243	2.35724	12480	12695	+	12695	ENSG00000237567	589	0	no	NA	0	no	NA	2.22015	2.34843	0.0810376
chr6	170018599	170019452	0.0637031	2.76587	5.44023	28298	28724	+	28724	WDR27	677	-0.85	down	0.114	0.33	up	0.673	1.98142	2.09793	0.0824275
chr15	39006722	39007435	0.286664	2.04434	2.8342	14482	14839	-	-14839	C15orf53	2043	-10000	down	0.639	0	no	NA	4.96549	5.26047	0.0832554
chr5	172222176	172222861	0.159258	1.38294	3.1183	17398	17741	-	-17741	ENSG00000253736	352	-0.09	down	1	-10000	down	0.4	5.84878	6.19984	0.0840964
chr5	10551460	10551872	0.222961	1.17249	2.39471	9653	9859	-	-9859	ENSG00000214179	240	0	no	NA	0	no	NA	3.48539	3.69486	0.0841962
chr15	67341780	67342747	0.509625	2.07441	2.02519	15436	15919	+	15919	SMAD3	1518	-1.19	down	3.41e-59	-0.05	down	0.737	5.61005	5.94935	0.0847164
chr8	95319621	95320202	0.541476	2.31492	2.09599	44948	45239	+	45239	ENSG00000244217	731	0.48	up	0.518	0.08	up	1	1.12201	1.18987	0.0847164
chr19	1177484	1178118	0.286664	1.56332	2.44718	3202	3519	-	-3519	SBNO2	4803	-0.14	down	0.164	-0.54	down	3.12e-14	3.24667	3.44436	0.0852746
chr9	99276221	99277620	0.318515	3.18677	3.32266	-564	135	-	-135	CDC14B	689	0.55	up	0.196	0.91	up	0.0747	5.25196	5.5736	0.0857514
chr6	16947603	16948128	0.509625	1.83389	1.8474	150890	151153	+	151153	FLJ23152	618	0	no	NA	0	no	NA	3.12731	3.31911	0.0858752
chr5	150472903	150473554	0.382219	1.59338	2.05962	-236	90	-	-90	TNIP1	575	0.53	up	1.39e-06	0.32	up	0.00636	4.77451	5.0726	0.0873715
chr3	149104221	149105031	0.445922	3.66779	3.04005	-149	256	-	-256	ENSG00000240541	754	-0.14	down	1	-10000	down	0.4	3.15118	3.35042	0.0884506
chr10	75666454	75667151	0.286664	1.86396	2.70094	1784	2133	+	2133	PLAU	468	-3.91	down	1.61e-238	-2.57	down	5.15e-108	3.9151	4.16454	0.0891082
chr11	61739930	61740576	0.509625	2.64562	2.3761	2968	3291	-	-3291	LOC399900	1645	1.22	up	0.311	-0.56	down	0.809	6.06363	6.45034	0.0891936
chr6	147235609	147236414	0.318515	3.63773	3.5136	606	1009	+	1009	LOC729178	2019	-1.82	down	5.85e-08	-0.89	down	0.00915	3.79574	4.03929	0.089722
chr2	74793658	74794330	0.159258	2.22472	3.80419	7815	8151	-	-8151	C2orf65	1503	-0.86	down	0.598	-0.14	down	1	4.1777	4.44635	0.0899137
chr8	124890155	124890901	0.573328	2.04434	1.8342	25928	26301	-	-26301	FER1L6	6051	-0.22	down	0.873	0.7	up	0.433	3.31829	3.53829	0.0926156
chr2	161693179	161693693	0.445922	1.44306	1.69427	211424	211681	+	211681	ENSG00000232337	1941	0	no	NA	0	no	NA	2.81696	3.00598	0.0936972
chr2	216749301	216749799	0.605179	1.47313	1.28345	14060	14309	-	-14309	ENSG00000227824	478	1.35	up	0.776	0	no	NA	4.22544	4.50898	0.0936972
chr17	25711291	25711676	0.350367	1.05223	1.58652	33354	33547	+	33547	LOC440419	3083	0	no	NA	-10000	down	0.673	1.40848	1.50299	0.0936972
chr3	171870960	171871288	0.286664	1.14243	1.99467	4635	4799	-	-4799	FNDC3B	682	-0.46	down	0.0892	-0.39	down	0.364	3.34216	3.56961	0.0949847
chr12	109226607	109227126	0.382219	2.13453	2.48145	5280	5539	-	-5539	SSH1	2439	-0.46	down	5.18e-08	0.08	up	0.665	5.6578	6.04328	0.0950915
chr5	73938852	73939502	0.509625	2.10447	2.04595	1603	1928	-	-1928	ENC1	5381	-1.64	down	0	-0.74	down	3.23e-24	3.89123	4.16454	0.097932
chr18	68089356	68089952	0.191109	1.44306	2.91667	7515	7813	+	7813	ENSG00000214255	895	0	no	NA	10000	up	1	2.98407	3.19386	0.0980188
chr13	45480729	45481275	0.41407	1.53326	1.88865	32109	32382	+	32382	NUFIP1	3487	-0.33	down	0.0757	0.04	up	1	2.07691	2.22318	0.0981813
chr11	62320857	62321261	0.445922	1.56332	1.80975	2446	2648	+	2648	AHNAK	580	0.08	up	0.441	0.88	up	3.93e-19	6.92304	7.42103	0.100212
chr13	52219374	52219885	0.477773	1.17249	1.29518	14844	15100	+	15100	WDFY2	1068	-0.68	down	1.09e-05	0.43	up	0.00657	4.20157	4.50898	0.101871
chr21	37432412	37432852	0.700734	1.14243	0.705162	-199	21	-	-21	SETD4	1208	-0.47	down	0.00729	-0.19	down	0.456	4.87	5.22916	0.102657
chr2	238131944	238132401	0.254812	2.40511	3.23859	8178	8407	+	8407	ENSG00000224132	592	0	no	NA	-10000	down	0.4	3.29441	3.53829	0.103032
chr14	62028363	62028977	0.286664	2.31492	3.01353	8281	8588	+	8588	FLJ22447	1641	-0.02	down	0.875	-0.87	down	0.0996	7.51986	8.07858	0.103397
chr12	57505692	57506331	0.477773	2.1646	2.1797	496	816	-	-816	STAT6	4017	0.14	up	0.0345	0.18	up	0.0808	5.01324	5.38572	0.103397
chr11	9587476	9587951	0.382219	0.841788	1.13906	7276	7514	+	7514	WEE1	2799	0.68	up	1.1e-12	-0.07	down	0.688	2.24402	2.41105	0.103575
chr3	127500183	127500574	0.191109	1.20255	2.65363	58	254	+	254	MGLL	410	1.29	up	1.65e-53	1.08	up	1.38e-22	4.63128	4.97866	0.104348
chr10	4283761	4284353	0.637031	2.13453	1.74449	789	1085	+	1085	ENSG00000233117	445	2.89	up	0.00153	0.2	up	1	4.36868	4.69685	0.104497
chr4	82527840	82528500	0.41407	2.10447	2.34551	3812	4142	-	-4142	RASGEF1B	539	0	no	NA	0	no	NA	2.38726	2.56761	0.105074
chr14	77384517	77385907	0.254812	3.03645	3.57488	31424	32119	-	-32119	ENSG00000241081	374	0.24	up	0.609	-0.11	down	0.909	6.15912	6.63822	0.108071
chr1	172328011	172328682	0.286664	1.35287	2.23859	10186	10522	+	10522	PIGC	926	0.72	up	0.581	2.71	up	0.107	2.14853	2.31711	0.108978
chr14	89882027	89882572	0.573328	1.62345	1.50163	776	1048	+	1048	FOXN3	2635	1.45	up	3.09e-110	0.71	up	2.76e-12	4.1777	4.50898	0.110092
chr1	244599069	244599444	0.191109	0.841788	2.13906	1638	1826	+	1826	ADSS	1197	0.1	up	0.522	-0.17	down	0.257	2.29177	2.47368	0.110196
chr12	27338303	27338883	0.318515	2.826	3.14933	58018	58308	+	58308	STK38L	5051	-0.35	down	7.49e-09	0.93	up	1.07e-35	4.46417	4.8221	0.11127
chr3	112372186	112372946	0.509625	1.83389	1.8474	3809	4189	-	-4189	CCDC80	684	-0.54	down	9.08e-18	-0.41	down	1.18e-06	5.27584	5.69885	0.11127
chr2	9319175	9319676	0.382219	1.413	1.88629	25838	26088	+	26088	LOC100506317	689	0	no	NA	0	no	NA	4.75064	5.13522	0.112305
chr1	67029737	67030564	0.541476	4.29913	2.98907	29772	30185	-	-30185	SGIP1	4554	-0.18	down	0.525	0.7	up	5.65e-07	3.53314	3.82011	0.112662
chr5	172199371	172199950	0.222961	1.29275	2.53558	1140	1429	-	-1429	DUSP1	1354	1.79	up	1.21e-177	1.87	up	7.16e-169	9.14319	9.8947	0.113958
chr3	57996983	57997364	0.191109	0.751596	1.97556	2856	3047	-	-3047	FLNB	9467	-0.8	down	1.81e-47	-0.34	down	3.7e-05	3.55701	3.85142	0.114724
chrx	45569649	45570032	0.159258	0.721532	2.1797	999999999	999999999	?	1									3.55701	3.85142	0.114724
chr5	106724112	106725260	0.477773	4.239	3.14933	-142	432	-	-432	EFNA5	606	-0.43	down	0.275	-0.43	down	0.576	2.19628	2.37974	0.115743
chr13	86071682	86072228	0.254812	2.10447	3.04595	46477	46750	+	46750	ENSG00000226317	913	0	no	NA	0	no	NA	1.64721	1.7848	0.115743
chr9	86986677	86987066	0.159258	0.962043	2.59474	3264	3459	-	-3459	SLC28A3	4536	-3.62	down	0.000375	-1.02	down	0.19	2.62598	2.84942	0.117813
chr8	49340975	49341527	0.127406	1.47313	3.53138	272	548	-	-548	LOC286068	2517	-0.6	down	0.306	-0.06	down	0.971	7.87795	8.54827	0.117813
chr20	49982439	49983230	0.41407	2.19466	2.40605	20264	20660	+	20660	NFATC2	7437	0.85	up	0.00931	0.69	up	0.0171	4.4403	4.8221	0.119005
chr16	53124413	53125522	0.382219	3.12664	3.03214	7550	8104	+	8104	CHD9	2188	0.41	up	0.0313	0.2	up	0.663	3.77187	4.10192	0.12102
chrx	48455948	48456362	0.445922	0.751596	0.753168	999999999	999999999	?	1									3.77187	4.10192	0.12102
chr10	73741245	73741743	0.382219	1.02217	1.41917	17125	17374	-	-17374	CHST3	6973	-0.03	down	0.891	0.15	up	0.111	3.77187	4.10192	0.12102
chr5	142623479	142624201	0.318515	1.95415	2.61711	14903	15264	-	-15264	ARHGAP26	9200	0.75	up	5.29e-08	0.61	up	4.64e-05	5.75329	6.26247	0.122345
chr16	73023629	73024415	0.350367	1.65351	2.23859	21290	21683	+	21683	LOC100506152	574	0	no	NA	0	no	NA	3.67638	4.00798	0.124591
chr4	129438865	129439626	0.286664	2.01428	2.81283	922	1303	+	1303	LOC100507487	2012	-0.44	down	0.38	-0.83	down	0.0469	3.81961	4.16454	0.124732
chr18	74171679	74172332	0.445922	1.47313	1.72402	2724	3051	+	3051	ZNF516	6558	0.18	up	0.222	0.03	up	0.788	5.68167	6.19984	0.125917
chr11	2799848	2800314	0.41407	0.992107	1.26062	1043	1276	-	-1276	KCNQ1	1046	10000	up	1	0	no	NA	2.84084	3.09992	0.125917
chr15	50347248	50347877	0.382219	1.65351	2.11306	5312	5627	-	-5627	ATP8B4	3507	0.81	up	0.174	1.46	up	0.189	3.70025	4.03929	0.126481
chr7	7196666	7197276	0.350367	1.71364	2.29012	101	406	-	-406	C1GALT1	802	-0.99	down	5.4e-42	-0.31	down	0.0252	4.84613	5.29179	0.126921
chr2	238322648	238323139	0.222961	1.14243	2.35724	-202	44	-	-44	COL6A3	9981	0.56	up	1.4e-14	-0.48	down	8.39e-06	5.27584	5.76147	0.127037
chr15	38422976	38423447	0.41407	1.26268	1.60854	57804	58039	-	-58039	LOC100507568	1256	0.27	up	0.701	0.81	up	0.286	2.0053	2.19186	0.128343
chr8	144536790	144537173	0.0955546	0.661405	2.79114	16960	17151	-	-17151	ZC3H3	186	-0.3	down	0.783	0.12	up	1	0.572942	0.626247	0.128343
chr3	171591989	171592669	0.350367	1.92409	2.45723	1473	1813	+	1813	ENSG00000234717	427	0	no	NA	0	no	NA	3.31829	3.63223	0.130418
chr1	59349028	59349401	0.541476	1.47313	1.44391	488	674	-	-674	ENSG00000232453	1211	0.54	up	0.63	-0.18	down	1	2.45887	2.69286	0.131142
chr5	121411608	121412063	0.254812	1.35287	2.40852	-184	44	-	-44	LOX	1574	0.19	up	0.00896	0.36	up	2.28e-05	4.48804	4.91604	0.13141
chr2	8821398	8821701	0.318515	1.17249	1.88014	292	443	+	443	LOC100506299	794	-1.65	down	0.00535	-0.66	down	0.478	3.34216	3.66354	0.132459
chr1	183132499	183133001	0.382219	1.77377	2.21435	17772	18023	-	-18023	LAMC1	7889	-0.29	down	7.36e-05	0.14	up	0.224	4.65515	5.10391	0.132776
chr13	114559520	114560183	0.318515	2.52536	2.98706	5352	5684	-	-5684	GAS6	3807	0.94	up	1.38e-80	1.09	up	1.56e-51	2.48275	2.72417	0.133881
chr13	45293956	45294676	0.0637031	1.65351	4.69803	18804	19164	-	-19164	ENSG00000237585	295	10000	up	1	-0.61	down	1	2.48275	2.72417	0.133881
chr2	128326784	128327374	0.254812	1.62345	2.67155	1163	1458	+	1458	MYO7B	2116	10000	up	1	0	no	NA	2.33951	2.56761	0.13422
chr3	177185981	177186597	0.509625	2.22472	2.12612	26229	26537	-	-26537	LOC100505566/LOC100508527	542	10000	up	0.663	0.41	up	1	3.2228	3.53829	0.134741
chr5	158181050	158181376	0.286664	1.47313	2.36145	22998	23161	-	-23161	EBF1	766	-0.12	down	0.706	-0.14	down	0.84	3.2228	3.53829	0.134741
chr12	122884627	122885376	0.222961	1.50319	2.75317	66	441	-	-441	CLIP1	5957	-0.01	down	0.948	-0.14	down	0.196	2.64986	2.91205	0.136121
chr5	97764362	97764826	0.700734	1.80383	1.36413	16866	17098	-	-17098	ENSG00000249448	1558	1.01	up	1	0.35	up	1	0.74005	0.814121	0.137621
chr9	82414883	82415467	0.509625	1.68358	1.72402	62467	62759	+	62759	ENSG00000238002	4039	-10000	down	0.639	0	no	NA	0.74005	0.814121	0.137621
chr12	89619520	89619957	0.700734	1.26268	0.849552	121880	122099	+	122099	DUSP6	2820	-0.42	down	2.42e-05	0.13	up	0.499	3.12731	3.44436	0.139314
chr17	10017824	10018825	0.732586	1.50319	1.03696	-46	454	-	-454	GAS7	1432	-2.77	down	1.93e-05	-1.24	down	0.109	2.38726	2.63024	0.139839
chr14	62049095	62049551	0.541476	1.83389	1.75994	11781	12009	-	-12009	FLJ22447	1306	-0.21	down	0.96	-1.57	down	7.01e-06	4.51192	4.97866	0.142018
chr1	151945343	151945906	0.222961	1.68358	2.91667	9480	9762	+	9762	S100A10	788	0.43	up	1.48e-14	0.09	up	0.398	0.907158	1.00199	0.14345
chr14	35119971	35120458	0.254812	1.02217	2.00413	13872	14116	+	14116	SNX6	591	0.24	up	0.0277	0.17	up	0.165	2.12466	2.34843	0.144463
chr10	112185973	112186451	0.41407	1.50319	1.86008	2147	2386	+	2386	ENSG00000235874	497	10000	up	0.086	-10000	down	0.673	4.55966	5.04129	0.144866
chr4	42414301	42414756	0.573328	1.17249	1.03214	86	313	+	313	ATP8A1	1605	-0.1	down	1	-1.85	down	0.137	1.98142	2.19186	0.145621
chr17	19351952	19352455	0.541476	1.38294	1.35277	524	776	-	-776	ENSG00000235979	530	0	no	NA	0	no	NA	2.74535	3.0373	0.145801
chr1	151864673	151864985	0.350367	1.0823	1.62716	757	913	-	-913	THEM4	1618	-0.32	down	0.432	-0.15	down	0.9	1.52784	1.69087	0.146265
chr15	67390609	67391101	0.477773	1.413	1.56436	10564	10810	+	10810	AK129712	1359	0	no	NA	0	no	NA	5.08486	5.63622	0.148521
chr4	55147667	55148026	0.541476	1.35287	1.32106	118	298	+	298	PDGFRA	1146	0.03	up	0.829	0.06	up	0.735	2.31564	2.56761	0.149017
chr14	69406570	69407051	0.41407	1.413	1.77082	37232	37473	+	37473	ACTN1	2824	-0.48	down	1.78e-16	0.3	up	0.000406	3.55701	3.94536	0.149489
chr5	90607247	90608450	0.318515	3.54753	3.47738	-138	464	+	464	LOC100505994	433	-0.24	down	1	-1.64	down	0.361	3.86736	4.28979	0.14956
chr21	34191953	34192376	0.318515	1.47313	2.20945	5900	6111	-	-6111	C21orf62	4121	-10000	down	0.218	0	no	NA	1.86206	2.06661	0.15037
chr7	99663355	99663925	0.477773	1.68358	1.81713	129	414	-	-414	ZNF3	1763	0.45	up	0.0288	0.12	up	0.673	0.310343	0.344436	0.15037
chr7	80351951	80352638	0.286664	1.89402	2.72402	19216	19560	+	19560	SEMA3C	5174	-0.64	down	1.56e-35	-0.81	down	1e-49	4.34481	4.8221	0.15037
chr15	92469915	92470555	0.573328	1.98421	1.79114	10421	10741	-	-10741	SLCO3A1	3985	-0.07	down	0.891	-0.12	down	0.695	2.1724	2.41105	0.15037
chr6	122253728	122254176	0.254812	1.62345	2.67155	73819	74043	-	-74043	ENSG00000220184	513	10000	up	1	10000	up	1	2.79309	3.09992	0.15037
chr3	99620147	99620599	0.445922	1.29275	1.53558	3176	3402	-	-3402	FILIP1L	1712	0	no	NA	0	no	NA	2.02917	2.25449	0.151912
chr1	183149818	183150304	0.382219	1.38294	1.85527	4870	5113	+	5113	LAMC2	4522	-2.16	down	1e-300	-0.91	down	2.33e-28	2.19628	2.44236	0.153218
chr5	152930914	152931543	0.286664	1.83389	2.67748	6112	6427	+	6427	GRIA1	572	0.44	up	1	0.12	up	1	3.29441	3.66354	0.153218
chr3	113502292	113502879	0.732586	1.35287	0.884957	2288	2581	+	2581	ATP6V1A	710	-0.21	down	0.229	-0.08	down	0.675	1.57559	1.75349	0.154339
chr10	43624803	43625201	0.382219	1.44306	1.91667	598	797	+	797	RET	5617	-10000	down	0.12	-1.79	down	0.511	1.7427	1.94137	0.155749
chr19	19729554	19729854	0.541476	0.601277	0.151131	-129	21	+	21	PBX4	1722	0	down	0.966	0.39	up	0.939	1.7427	1.94137	0.155749
chr11	8740727	8741276	0.350367	2.19466	2.64706	38	312	-	-312	ST5	3395	0.28	up	0.0264	0.21	up	0.0881	5.75329	6.41903	0.157968
chr11	86454541	86455154	0.605179	1.38294	1.1923	16144	16451	-	-16451	ENSG00000255250	504	-10000	down	0.639	-0.61	down	1	4.32093	4.8221	0.158318
chr9	16964100	16964609	0.254812	1.47313	2.53138	48280	48535	-	-48535	AK024561	1263	0	no	NA	0	no	NA	2.88858	3.22517	0.159015
chr3	112359832	112360376	0.605179	1.59338	1.39666	-260	12	+	12	CCDC80	4664	-0.48	down	2.41e-15	-0.43	down	1.24e-06	5.46682	6.10591	0.159504
chr3	66038593	66039082	0.254812	1.17249	2.20207	14084	14329	-	-14329	MAGI1	7235	-0.89	down	2.85e-29	0.09	up	0.53	2.74535	3.06861	0.160598
chr9	137483964	137484670	0.254812	1.35287	2.40852	6928	7281	-	-7281	ENSG00000234960	2398	-2.31	down	0.354	-1.07	down	1	7.59148	8.48564	0.160644
chr18	53500579	53501208	0.382219	1.56332	2.03214	13590	13904	-	-13904	AK097780	2593	10000	up	1	0	no	NA	3.24667	3.63223	0.161896
chr6	135148184	135148609	0.222961	1.86396	3.06351	70404	70616	+	70616	ENSG00000213117	878	-0.68	down	1	-0.77	down	0.909	1.79044	2.00399	0.162559
chr2	46165857	46166426	0.254812	1.68358	2.72402	1000	1285	-	-1285	AK022272	2042	0	no	NA	0	no	NA	1.95755	2.19186	0.163109
chr21	39661533	39662220	0.286664	2.04434	2.8342	754	1098	+	1098	AK057957	1777	-1.36	down	0.815	-0.87	down	0.725	4.58353	5.13522	0.163967
chr19	11545801	11546161	0.637031	1.14243	0.842666	-179	1	-	-1	CCDC151	2162	-1.26	down	0.11	1	up	0.638	3.60476	4.03929	0.1642
chr1	246023850	246024204	0.637031	1.38294	1.1183	1901	2078	-	-2078	SMYD3	467	-1.42	down	9.79e-15	-1.88	down	1.73e-54	2.48275	2.7868	0.166671
chr6	54511271	54511779	0.445922	1.26268	1.50163	20985	21239	-	-21239	ENSG00000220773	884	-10000	down	0.213	1.37	up	0.852	3.31829	3.72617	0.167254
chr19	39141792	39142201	0.127406	1.0823	3.08659	2958	3163	-	-3163	ACTN4	586	-0.06	down	0.603	0.49	up	1.93e-11	3.31829	3.72617	0.167254
chr6	13761186	13761526	0.41407	2.1646	2.38615	8721	8891	+	8891	RANBP9	4742	0.01	up	1	-0.04	down	0.853	4.32093	4.85341	0.167656
chr2	56089586	56090226	0.318515	1.59338	2.32266	2871	3191	+	3191	EFEMP1	3094	0.6	up	3.95e-29	-0.34	down	4.91e-05	3.50927	3.94536	0.168985
chr7	68884436	68884751	0.286664	0.962043	1.74674	11106	11263	+	11263	ENSG00000225718	653	-10000	down	0.639	0	no	NA	0.83554	0.93937	0.168985
chr6	129811651	129812076	0.286664	1.32281	2.20617	-196	17	+	17	LAMA2	373	2.12	up	2.65e-223	0.52	up	0.00276	4.84613	5.44835	0.168985
chr6	73571708	73572283	0.222961	2.34498	3.39471	123752	124040	+	124040	ENSG00000232422	1438	-0.93	down	0.571	-0.63	down	0.725	2.84084	3.19386	0.168985
chr13	29327504	29328082	0.222961	1.95415	3.13168	24613	24902	+	24902	ENSG00000236339	380	0	no	NA	0	no	NA	3.36603	3.78879	0.17069
chr12	109548676	109549136	0.668883	1.23262	0.881901	-122	108	-	-108	UNG	2064	0.36	up	9.93e-05	0	down	1	2.36338	2.66155	0.171412
chr16	56640353	56641607	0.541476	5.08079	3.23008	504	1131	+	1131	MT2A	786	2.43	up	0	1.04	up	3.92e-57	5.08486	5.73016	0.172368
chr14	30664105	30664546	0.254812	1.32281	2.3761	3002	3222	-	-3222	PRKD1	3440	1.2	up	2.31e-80	1.1	up	4.02e-69	4.63128	5.22916	0.175169
chr14	62036328	62036946	0.254812	2.13453	3.06641	312	621	+	621	FLJ22447	1641	-0.02	down	0.875	-0.87	down	0.0996	5.49069	6.19984	0.175244
chr3	30700488	30701351	0.254812	2.1646	3.08659	1672	2103	+	2103	TGFBR2	285	0.9	up	1.02e-20	0.39	up	0.0147	4.46417	5.04129	0.1754
chr11	57794734	57795165	0.382219	1.14243	1.57963	3236	3452	+	3452	OR6Q1	1001	0	no	NA	0	no	NA	2.41113	2.72417	0.17611
chr6	151389077	151389755	0.41407	1.7437	2.07421	11884	12223	-	-12223	ENSG00000232290	398	0	no	NA	0	no	NA	2.24402	2.5363	0.176639
chr6	25172956	25173454	0.222961	1.14243	2.35724	6163	6412	-	-6412	CMAH	1461	-0.08	down	0.794	0.1	up	0.82	3.81961	4.3211	0.177974
chr11	102096551	102097069	0.350367	1.17249	1.74264	635	894	+	894	YAP1	964	-0.02	down	0.948	0.02	up	0.852	2.435	2.75549	0.178384
chr11	35604501	35605128	0.286664	3.81811	3.73543	1730	2044	+	2044	ENSG00000254669	537	0	no	NA	0	no	NA	2.79309	3.16255	0.179224
chr13	113841429	113842029	0.573328	1.23262	1.10429	-284	16	-	-16	PCID2	844	0.22	up	0.069	0.2	up	0.36	4.03446	4.5716	0.180323
chr14	93006839	93007350	0.41407	1.53326	1.88865	11676	11931	-	-11931	RIN3	4065	-0.71	down	6.79e-29	-0.37	down	0.000632	2.98407	3.38173	0.180481
chr3	134045543	134046176	0.350367	1.92409	2.45723	5530	5847	-	-5847	ENSG00000240006	294	0.04	up	1	0	no	NA	7.42437	8.42302	0.182069
chr11	128352201	128353204	0.477773	2.25479	2.23859	6874	7376	+	7376	ETS1	396	-0.65	down	0.0191	0.17	up	0.777	3.19892	3.63223	0.18327
chr1	161972829	161973477	0.350367	1.71364	2.29012	2749	3073	+	3073	OLFML2B	567	-0.14	down	0.53	-0.71	down	4.94e-07	3.03182	3.44436	0.184053
chr6	166970273	166970783	0.254812	1.413	2.47126	12102	12357	-	-12357	RPS6KA2/RNASET2	2290	1.6	up	9.03e-206	0.41	up	7.72e-06	3.3899	3.85142	0.184145
chr9	97662905	97663410	0.254812	1.29275	2.34293	194	447	-	-447	ENSG00000236095	779	-10000	down	0.639	0	no	NA	4.46417	5.0726	0.184333
chr16	20917767	20918520	0.254812	3.30702	3.69803	3960	4336	-	-4336	LYRM1	1542	0.11	up	0.378	0.34	up	0.00538	4.46417	5.0726	0.184333
chr16	66300308	66300754	0.318515	1.20255	1.91667	97767	97990	+	97990	CDH5	4248	-0.42	down	0.814	10000	up	0.752	6.6127	7.51496	0.184526
chr7	105229794	105230270	0.445922	1.05223	1.23859	1697	1935	+	1935	EFCAB10	797	-0.08	down	1	0.17	up	0.685	0.358089	0.40706	0.184927
chr10	64003001	64003583	0.318515	1.53326	2.26716	5085	5376	-	-5376	RTKN2	2076	-2.04	down	4.16e-06	-1.33	down	0.00275	2.50662	2.84942	0.184927
chrx	152647254	152647669	0.541476	0.811724	0.584091	999999999	999999999	?	1									0.716177	0.814121	0.184927
chr14	95485042	95485722	0.41407	2.04434	2.30369	66843	67183	+	67183	DICER1	10331	0.58	up	1.9e-18	0.13	up	0.286	0.716177	0.814121	0.184927
chr11	86448664	86449286	0.445922	2.28485	2.35724	10267	10578	-	-10578	ENSG00000255250	504	-10000	down	0.639	-0.61	down	1	5.20422	5.91803	0.185436
chr10	106089980	106090626	0.573328	2.25479	1.97556	1298	1621	-	-1621	ITPRIP	3981	0.25	up	0.000324	0.54	up	6.92e-14	3.60476	4.10192	0.186396
chr9	133656251	133656963	0.350367	2.31492	2.72402	53490	53846	+	53846	ABL1	5766	-1.19	down	4.99e-131	-0.79	down	1.96e-35	3.07956	3.50698	0.187505
chr6	75381048	75381939	0.573328	4.9906	3.12178	18504	18949	+	18949	ENSG00000223786	669	-10000	down	0.639	10000	up	0.752	3.62863	4.13323	0.187844
chr14	69014907	69015332	0.159258	1.14243	2.84267	7942	8154	-	-8154	RAD51L1	546	-0.3	down	0.675	0.31	up	0.919	7.99731	9.11189	0.188236
chr2	208103569	208104684	0.222961	4.59977	4.3667	-310	248	+	248	ENSG00000229647	806	1.14	up	1.28e-06	0.52	up	0.137	5.6578	6.45034	0.189135
chr1	59220904	59221518	0.637031	1.50319	1.23859	24945	25252	+	25252	JUN	3323	-2.63	down	0	-1.09	down	1.28e-77	3.29441	3.75748	0.189744
chr3	107241487	107242032	0.318515	1.83389	2.52548	-250	23	+	23	BBX	8899	0.56	up	1.23e-23	0.57	up	2.2e-14	4.24932	4.85341	0.191769
chr12	680557	681256	0.318515	1.35287	2.08659	4960	5310	-	-5310	NINJ2	820	1.15	up	4.84e-34	0.05	up	1	6.66045	7.6089	0.192069
chr12	123930385	123930861	0.350367	0.901915	1.36413	9121	9359	-	-9359	RILPL2	1435	0.76	up	2.45e-28	0.69	up	1.85e-16	2.22015	2.5363	0.192069
chr11	61771912	61772292	0.0955546	1.17249	3.61711	6931	7121	+	7121	ENSG00000244176	852	-10000	down	0.639	10000	up	0.752	2.05304	2.34843	0.193932
chr12	64311607	64312254	0.286664	1.77377	2.62938	45782	46106	-	-46106	ENSG00000242087	303	10000	up	1	0.35	up	1	3.19892	3.66354	0.195653
chr5	142533040	142533651	0.382219	1.68358	2.13906	5960	6265	-	-6265	ARHGAP26	407	0.49	up	0.639	0.79	up	0.537	4.72677	5.41704	0.196649
chr1	8264344	8265210	0.286664	1.50319	2.3906	3522	3955	+	3955	ENSG00000227634	497	10000	up	0.416	10000	up	1	3.79574	4.35242	0.197436
chr15	85458180	85458589	0.382219	0.992107	1.3761	11300	11505	+	11505	SLC28A1	1334	0	no	NA	10000	up	1	3.79574	4.35242	0.197436
chr9	137483367	137483794	0.254812	1.47313	2.53138	6330	6544	-	-6544	ENSG00000234960	2398	-2.31	down	0.354	-1.07	down	1	6.85143	7.8594	0.198014
chr7	73686812	73687430	0.254812	1.17249	2.20207	16375	16684	+	16684	CLIP2	5563	-0.34	down	3.29e-05	0.17	up	0.159	2.10079	2.41105	0.198733
chr3	128210775	128211076	0.509625	1.02217	1.00413	940	1090	+	1090	GATA2	563	0	no	NA	10000	up	1	0.572942	0.657559	0.198733
chr19	56643825	56644125	0.382219	1.0823	1.50163	8431	8581	+	8581	ZNF444	2043	-0.26	down	0.0284	-0.28	down	0.0348	1.14588	1.31512	0.198733
chr1	172113655	172114576	0.477773	3.00638	2.65363	-278	182	-	-182	LOC100128178	568	-0.89	down	4.13e-06	-0.66	down	0.0091	5.20422	5.98066	0.200622
chr3	170458865	170459301	0.509625	1.35287	1.40852	-147	71	+	71	ENSG00000239739	263	-10000	down	0.639	0	no	NA	4.4403	5.10391	0.200947
chr7	6055468	6055866	0.350367	0.871852	1.31522	586	785	-	-785	AIMP2	777	-0.04	down	0.929	0.02	up	1	2.12466	2.44236	0.201047
chr10	78989976	78990304	0.605179	1.02217	0.756202	18885	19049	+	19049	KCNMA1	2507	0.45	up	0.0773	-0.32	down	0.361	1.7427	2.00399	0.201553
chr22	30162102	30162464	0.541476	0.751596	0.47306	486	667	+	667	ZMAT5	1067	-0.18	down	0.298	0.18	up	0.316	3.29441	3.78879	0.201717
chr21	43050347	43051002	0.191109	1.32281	2.79114	48340	48667	+	48667	NCRNA00111	575	0	no	NA	0	no	NA	2.91245	3.35042	0.202107
chr1	7351429	7352234	0.541476	1.86396	1.7834	21890	22293	-	-22293	CAMTA1	160	1.38	up	1	0.9	up	0.852	2.91245	3.35042	0.202107
chr15	39420436	39420876	0.191109	1.92409	3.3317	122009	122229	+	122229	C15orf54	3080	1.71	up	8.7e-12	0.89	up	0.0291	5.63393	6.48166	0.202222
chr2	147739958	147740410	0.350367	1.23262	1.81479	80458	80684	-	-80684	ENSG00000227902	532	0	no	NA	0	no	NA	2.33951	2.69286	0.202933
chr16	85026212	85026611	0.159258	0.721532	2.1797	2250	2449	-	-2449	ZDHHC7	2543	-0.07	down	0.473	0.06	up	0.699	2.33951	2.69286	0.202933
chr2	47058381	47059226	0.41407	2.826	2.77082	3378	3801	-	-3801	LOC388948/LOC100134259	1210	-1.14	down	3.9e-13	-2.45	down	1.25e-56	5.08486	5.85541	0.203563
chr2	121227973	121228525	0.668883	1.53326	1.19677	4048	4324	-	-4324	LOC84931	2015	0	no	NA	0	no	NA	5.70554	6.57559	0.204756
chrx	13736198	13736567	0.637031	0.721532	0.179701	999999999	999999999	?	1									0.787795	0.908058	0.204965
chr15	62761979	62762473	0.509625	1.65351	1.69803	23846	24093	+	24093	AK021726	1515	0	no	NA	0	no	NA	3.55701	4.10192	0.205632
chr12	108761038	108761657	0.254812	1.53326	2.58909	27944	28254	-	-28254	CMKLR1	5496	0.09	up	0.273	-0.5	down	1.13e-09	3.58089	4.13323	0.206953
chr7	43687291	43688169	0.318515	2.34498	2.88014	-382	57	+	57	C7orf44	547	-0.26	down	0.564	-0.55	down	0.474	5.80103	6.70084	0.208032
chr16	54407668	54408211	0.41407	1.26268	1.60854	3298	3570	-	-3570	AK057319	1811	0	no	NA	0	no	NA	4.60741	5.3231	0.208312
chr2	127913383	127913890	0.445922	1.26268	1.50163	13698	13951	+	13951	ENSG00000237630	221	0	no	NA	0	no	NA	2.41113	2.7868	0.2089
chr17	38705527	38706105	0.445922	2.55543	2.5187	3916	4205	+	4205	CCR7	2185	1.31	up	1.62e-05	-0.07	down	0.921	6.44559	7.45234	0.20938
chr3	40096242	40096751	0.445922	1.32281	1.56874	15856	16111	+	16111	MYRIP	4153	3.94	up	3.43e-42	1.43	up	0.0164	3.6525	4.22717	0.210805
chr1	94791101	94791747	0.0955546	1.89402	4.30898	976	1299	-	-1299	ENSG00000236098	592	0	no	NA	10000	up	0.752	2.84084	3.2878	0.210805
chr10	104562732	104563397	0.286664	3.00638	3.3906	4984	5316	-	-5316	C10orf26	1475	1.48	up	7.56e-266	0.78	up	2.09e-35	1.83819	2.12924	0.212054
chr10	36965726	36966206	0.573328	1.35287	1.23859	152564	152804	-	-152804	bA92J19,4	2514	0.3	up	0.2	-0.44	down	0.093	3.27054	3.78879	0.212209
chr2	222761433	222761951	0.573328	1.62345	1.50163	46991	47250	+	47250	LOC646644	390	0	down	0.928	-0.04	down	1	2.67373	3.09992	0.213379
chr6	23004075	23004721	0.668883	1.53326	1.19677	12233	12556	+	12556	ENSG00000233358	353	0	no	NA	0	no	NA	1.64721	1.91005	0.213591
chr5	138180653	138181194	0.222961	1.23262	2.46686	16732	17003	-	-17003	CTNNA1	750	0.04	up	0.802	0.05	up	0.799	3.72412	4.3211	0.2145
chr5	35129143	35129811	0.509625	2.52536	2.30898	635	969	+	969	PRLR	588	1.61	up	0.389	10000	up	0.235	2.07691	2.41105	0.215221
chr13	51103091	51103939	0.541476	3.1567	2.54345	421	845	-	-845	DLEU1	1141	0.19	up	0.684	-0.08	down	1	4.60741	5.35441	0.216773
chr2	225848030	225848635	0.318515	1.62345	2.34963	-102	200	-	-200	DOCK10	528	-1.09	down	0.148	-0.73	down	0.576	3.79574	4.41504	0.218046
chr5	169547551	169548045	0.222961	1.23262	2.46686	10822	11069	-	-11069	FOXI1	2011	1.76	up	0.353	10000	up	0.0697	4.01059	4.66554	0.218229
chr16	24680696	24681189	0.350367	1.14243	1.70516	1194	1441	+	1441	FLJ45256	2907	-10000	down	0.639	0	no	NA	1.90981	2.22318	0.219197
chr1	26021414	26021997	0.286664	1.29275	2.17301	8422	8713	-	-8713	MAN1C1	3418	1.16	up	0.00971	0.23	up	0.875	4.05834	4.72816	0.220392
chr2	109788129	109788610	0.318515	1.50319	2.23859	41554	41795	-	-41795	LOC100287216	1568	2.2	up	4.23e-83	0.8	up	4.4e-06	5.1326	5.98066	0.220614
chr8	38794100	38795159	0.382219	1.80383	2.23859	592	1121	-	-1121	PLEKHA2	1141	0.09	up	0.471	0.28	up	0.11	6.44559	7.51496	0.221453
chr10	95802245	95802691	0.477773	1.14243	1.2577	11676	11899	-	-11899	PLCE1	7564	0.85	up	5.83e-53	0.66	up	9.21e-15	4.51192	5.26047	0.221453
chr5	41871930	41872427	0.254812	1.95415	2.93903	870	1119	-	-1119	ENSG00000248668	447	0.06	up	1	0.98	up	0.309	0.644559	0.751496	0.221453
chr11	94666401	94666910	0.382219	1.47313	1.94641	28876	29131	+	29131	CWC15	1575	0.01	up	1	0.09	up	0.632	3.00794	3.50698	0.221453
chr2	161244302	161244826	0.382219	1.89402	2.30898	8265	8527	+	8527	AK093576	2110	-1.18	down	0.759	-10000	down	0.4	3.46152	4.03929	0.222696
chr20	48782038	48782901	0.41407	1.56332	1.91667	-262	169	+	169	ENSG00000237595	735	0.36	up	0.829	10000	up	0.242	2.60211	3.0373	0.223106
chr2	106005105	106006073	0.0955546	6.67417	6.12612	612	1096	+	1096	FHL2	436	0.2	up	0.04	0.25	up	0.0666	2.1724	2.5363	0.223433
chr10	105408744	105409458	0.541476	1.47313	1.44391	12004	12361	+	12361	SH3PXD2A	3039	-0.32	down	0.00012	0.25	up	0.0373	1.7427	2.0353	0.223921
chr6	31648444	31648865	0.668883	1.14243	0.772276	182	392	+	392	LY6G5C	186	0.46	up	0.94	0.45	up	0.815	3.05569	3.56961	0.224268
chr9	16704633	16705661	0.286664	2.58549	3.17301	-447	67	-	-67	BNC2	792	-1.48	down	0.0203	-0.16	down	0.799	4.58353	5.35441	0.224268
chr18	56673772	56674316	0.541476	1.413	1.38379	9806	10078	-	-10078	LOC390858	2212	-10000	down	0.639	0	no	NA	2.84084	3.31911	0.22448
chr1	56184297	56185020	0.350367	3.03645	3.11545	15656	16017	+	16017	ENSG00000234810	4063	1.53	up	0.00553	0.71	up	0.453	6.3501	7.42103	0.224839
chr3	11187635	11188043	0.445922	1.20255	1.43124	8171	8375	+	8375	HRH1	4278	0.3	up	0.00116	-0.47	down	6.66e-06	3.72412	4.35242	0.224917
chr12	93293128	93293826	0.318515	2.01428	2.66083	-302	47	-	-47	AK000811	923	0	no	NA	10000	up	1	3.07956	3.60092	0.225641
chr7	80571428	80571926	0.254812	1.77377	2.79931	19753	20002	-	-20002	SEMA3C	2415	-0.71	down	2.46e-31	-0.79	down	1.17e-42	3.07956	3.60092	0.225641
chr1	208376557	208377312	0.41407	1.83389	2.14696	6020	6398	+	6398	PLXNA2	756	3	up	6.54e-117	2.54	up	1.74e-32	5.08486	5.94935	0.226524
chr11	34302762	34303204	0.573328	1.05223	0.876024	397	618	+	618	AK025359	2266	0	no	NA	-10000	down	0.4	2.22015	2.59892	0.227258
chr18	77163315	77163855	0.700734	0.992107	0.501629	2979	3249	-	-3249	NFATC1	2799	0.13	up	0.399	0.45	up	0.000133	2.67373	3.13123	0.227879
chr17	41047141	41047640	0.286664	1.47313	2.36145	2156	2405	+	2405	LOC388387	1742	0	no	NA	0	no	NA	0.668432	0.782809	0.227879
chr9	133722577	133723409	0.127406	1.83389	3.8474	6100	6516	+	6516	ABL1	532	-0.41	down	0.0939	-0.28	down	0.243	2.67373	3.13123	0.227879
chr13	24275530	24276151	0.541476	1.71364	1.66209	25286	25596	-	-25596	TNFRSF19	4183	-0.93	down	2.09e-65	0.67	up	2.01e-20	6.46947	7.57759	0.228092
chr3	151022747	151023332	0.318515	1.47313	2.20945	4860	5152	-	-5152	GPR87	1072	0	no	NA	0	no	NA	1.79044	2.09793	0.228648
chr6	32097989	32098398	0.541476	0.962043	0.829203	-78	127	-	-127	FKBPL	1344	0.15	up	0.601	-0.02	down	1	2.91245	3.41305	0.228825
chr9	89997966	89998301	0.382219	1.35287	1.82356	40244	40412	+	40412	ENSG00000228373	258	0	no	NA	0	no	NA	4.72677	5.54228	0.229627
chr11	130642215	130642983	0.382219	2.10447	2.46099	16143	16527	+	16527	ENSG00000255352	1795	0	no	NA	0	no	NA	2.26789	2.66155	0.230913
chr15	44579852	44580263	0.637031	1.14243	0.842666	646	851	+	851	CASC4	3985	-0.11	down	0.17	-0.06	down	0.719	3.19892	3.75748	0.232179
chr17	80970739	80971121	0.477773	0.78166	0.710215	1344	1535	+	1535	B3GNTL1	811	0.36	up	0.396	0.53	up	0.391	2.74535	3.22517	0.232388
chr17	38677628	38678367	0.477773	1.71364	1.84267	1346	1716	+	1716	LOC100508196/LOC100510229	751	3.23	up	4.69e-76	1.22	up	0.0263	7.8302	9.20583	0.233498
chr12	8771799	8772210	0.191109	0.931979	2.2859	6356	6562	-	-6562	AICDA	2794	-1.37	down	0.627	0.16	up	0.968	1.62333	1.91005	0.234652
chr11	114165426	114166077	0.159258	1.77377	3.47738	458	783	+	783	NNMT	1578	0.99	up	3.19e-138	0.15	up	0.144	2.79309	3.2878	0.235259
chr2	42193427	42194056	0.41407	1.86396	2.17042	12022	12336	-	-12336	LOC400950	630	0	no	NA	0	no	NA	5.61005	6.6069	0.23596
chr12	57527538	57527953	0.286664	1.32281	2.20617	4656	4863	-	-4863	STAT6	2924	0.12	up	0.0867	0.19	up	0.0531	6.0875	7.17053	0.236228
chr7	90711395	90711701	0.445922	1.17249	1.39471	24988	25141	+	25141	ENSG00000226254	420	0	no	NA	0	no	NA	1.40848	1.65955	0.236655
chr2	12246364	12246911	0.222961	1.38294	2.63287	-162	112	+	112	LOC100506457	475	-10000	down	0.639	-10000	down	0.4	2.12466	2.50499	0.237572
chr11	36477152	36477750	0.382219	1.53326	2.00413	313	612	-	-612	PRR5L	1493	0.85	up	3.48e-22	0	up	1	7.37662	8.70483	0.238856
chr1	22091269	22091909	0.286664	1.35287	2.23859	2853	3173	+	3173	ENSG00000231978	361	0	no	NA	0	no	NA	1.19363	1.40906	0.239375
chr2	12609222	12609715	0.477773	1.14243	1.2577	91676	91923	+	91923	LOC100506457	578	0	no	NA	0	no	NA	1.67108	1.97268	0.239375
chr1	85163794	85164351	0.254812	1.32281	2.3761	7308	7586	-	-7586	SSX2IP	759	-0.54	down	0.0858	-0.18	down	0.93	2.14853	2.5363	0.239375
chr13	102102693	102103223	0.254812	1.32281	2.3761	1743	2008	+	2008	ITGBL1	2422	1.27	up	3.21e-245	0.73	up	2.86e-23	4.05834	4.79079	0.239375
chr19	18527505	18527859	0.700734	0.841788	0.26459	1296	1473	-	-1473	SSBP4	2847	-0.14	down	0.452	-0.15	down	0.201	7.68697	9.08058	0.24037
chr13	101959700	101960026	0.382219	1.38294	1.85527	23334	23497	-	-23497	NALCN	1663	1.44	up	1.79e-10	0.7	up	0.0955	6.49334	7.67152	0.240553
chr3	174157258	174157925	0.318515	1.89402	2.57202	810	1143	+	1143	NAALADL2	463	-10000	down	0.00293	-0.07	down	1	4.39255	5.19785	0.242855
chr10	44363607	44364003	0.191109	1.32281	2.79114	8748	8946	-	-8946	LOC100506835/LOC100507740	1974	0.26	up	1	0.53	up	1	8.30765	9.83208	0.243055
chr1	151952716	151953426	0.254812	2.55543	3.32606	1960	2315	+	2315	S100A10	788	0.43	up	1.48e-14	0.09	up	0.398	1.95755	2.31711	0.243279
chr2	135159626	135160487	0.318515	2.70575	3.08659	30766	31197	+	31197	AK023838	6043	-1.11	down	0.434	0.39	up	1	2.6976	3.19386	0.243624
chr9	35936178	35936533	0.159258	1.17249	2.88014	614	792	+	792	ENSG00000231518	357	0	no	NA	0	no	NA	4.46417	5.29179	0.245363
chr8	26322923	26323723	0.445922	2.67568	2.58504	7397	7797	+	7797	ENSG00000228451	317	0	no	NA	0	no	NA	3.72412	4.41504	0.245527
chr13	45495902	45496963	0.445922	3.48741	2.96729	16422	16952	+	16952	NUFIP1	3487	-0.33	down	0.0757	0.04	up	1	2.98407	3.53829	0.245772
chr7	80928558	80929101	0.350367	1.68358	2.26459	35320	35592	+	35592	ENSG00000223514	78	0	no	NA	0	no	NA	3.24667	3.85142	0.246429
chr4	86953503	86954877	0.477773	3.06651	2.6822	14991	15678	-	-15678	MAPK10	1798	0.07	up	0.969	0.25	up	0.815	3.50927	4.16454	0.246988
chr2	37857394	37857904	0.668883	1.44306	1.10931	8679	8934	+	8934	CDC42EP3	664	-0.31	down	2.11e-05	0.29	up	0.000627	3.00794	3.56961	0.246988
chr6	86169045	86169608	0.445922	1.7437	1.96729	7170	7452	+	7452	NT5E	1639	-0.37	down	2.53e-09	0.01	up	1	2.50662	2.97467	0.246988
chr12	116864108	116864544	0.222961	0.901915	2.0162	106683	106901	+	106901	NCRNA00173	1597	-0.48	down	0.759	-1.32	down	0.633	3.53314	4.19585	0.248014
chr15	71119007	71119411	0.350367	0.901915	1.36413	4466	4668	+	4668	LARP6	1930	-1.08	down	9.78e-98	-0.92	down	2.53e-30	3.29441	3.91404	0.248638
chr1	33564710	33565421	0.382219	2.07441	2.44023	2072	2427	+	2427	ADC	1443	-0.74	down	0.0738	-0.52	down	0.177	3.55701	4.22717	0.249025
chr20	33894784	33895441	0.286664	1.65351	2.5281	-102	227	-	-227	UQCC	1921	0.02	up	0.886	-0.12	down	0.567	7.37662	8.76746	0.249198
chr3	147016395	147016878	0.350367	1.11236	1.66669	21356	21597	-	-21597	ENSG00000239412	455	0	no	NA	0	no	NA	1.02652	1.22118	0.250515
chr3	124781696	124782454	0.286664	2.4953	3.12178	6894	7273	-	-7273	HEG1	9156	-1.77	down	7.49e-283	-1.14	down	3.14e-53	3.62863	4.3211	0.251975
chr1	14108501	14108876	0.350367	1.83389	2.38797	-128	60	+	60	PRDM2	3780	0.07	up	0.879	0.07	up	0.725	1.81432	2.16055	0.251975
chr1	8107615	8108204	0.254812	1.95415	2.93903	9100	9395	+	9395	ENSG00000232848	800	0.64	up	1	10000	up	1	2.33951	2.7868	0.252401
chr1	12696180	12697020	0.318515	2.04434	2.6822	7546	7966	+	7966	AADACL4	1575	10000	up	1	0	no	NA	2.33951	2.7868	0.252401
chr3	134050151	134050701	0.41407	1.26268	1.60854	10138	10413	-	-10413	ENSG00000240006	294	0.04	up	1	0	no	NA	5.99201	7.13921	0.252724
chr16	85244886	85245239	0.222961	0.962043	2.10931	24082	24259	-	-24259	LOC123855	2046	0.8	up	6.56e-06	1.09	up	7.21e-08	3.3899	4.03929	0.252858
chr4	88000101	88000805	0.222961	2.55543	3.5187	5327	5679	+	5679	AFF1	479	0.65	up	0.256	1.33	up	0.0384	2.10079	2.50499	0.253874
chr12	108765384	108766305	0.382219	3.96843	3.3761	32290	32750	-	-32750	CMKLR1	5496	0.09	up	0.273	-0.5	down	1.13e-09	3.15118	3.75748	0.253874
chr13	64055448	64055876	0.509625	2.10447	2.04595	185938	186152	+	186152	ENSG00000231061	406	0	no	NA	0	no	NA	0.262598	0.313123	0.253874
chr2	237551118	237551726	0.286664	2.34498	3.03214	60117	60421	-	-60421	CXCR7	2203	-0.43	down	1.46e-05	-1.1	down	7.1e-28	4.98937	5.94935	0.253874
chr1	96881491	96882232	0.477773	1.86396	1.96397	1918	2288	+	2288	UBE2WP	340	0.16	up	0.978	-0.14	down	0.81	1.57559	1.87874	0.253874
chr9	110037152	110037776	0.191109	3.18677	4.05962	7642	7954	+	7954	RAD23B	716	-0.03	down	0.906	0.05	up	0.752	3.15118	3.75748	0.253874
chr13	114523980	114524379	0.382219	0.901915	1.23859	144	343	-	-343	GAS6	1140	0.95	up	2.02e-67	1.09	up	2.05e-45	3.70025	4.41504	0.254805
chr1	96827965	96828596	0.41407	1.71364	2.04912	11086	11401	+	11401	ENSG00000231987	1994	0	no	NA	0	no	NA	2.12466	2.5363	0.255494
chr15	68900533	68901251	0.318515	1.80383	2.50163	7628	7987	+	7987	CORO2B	3335	-1.5	down	3.5e-56	0	up	1	3.19892	3.82011	0.256026
chr22	40908368	40908803	0.382219	1.11236	1.54116	6328	6546	+	6546	MKL1	919	0.01	up	1	-0.06	down	0.964	1.88593	2.25449	0.257522
chr8	104356903	104357534	0.222961	1.77377	2.99195	11808	12124	-	-12124	FZD6	3768	0.03	up	0.962	0.1	up	0.492	3.27054	3.91404	0.25913
chr21	29814962	29815453	0.318515	1.95415	2.61711	1416	1662	+	1662	ENSG00000232855	900	-0.47	down	0.663	0.48	up	1	3.55701	4.25848	0.259672
chr7	40847825	40848485	0.41407	1.92409	2.21623	69	399	-	-399	C7orf10	452	0.29	up	0.147	-0.01	down	0.98	4.7029	5.63622	0.261179
chr1	172255858	172256800	0.605179	2.31492	1.93553	2959	3430	-	-3430	AK130463	2081	-1.18	down	0.445	0	no	NA	1.67108	2.00399	0.262095
chr8	38266232	38266749	0.191109	1.44306	2.91667	170	428	-	-428	LETM2	1873	0.09	up	0.762	-0.17	down	0.885	4.46417	5.35441	0.262336
chr14	59338801	59339316	0.477773	1.44306	1.59474	77054	77311	-	-77311	ENSG00000213598	376	0.94	up	0.0206	0.16	up	0.878	3.07956	3.69486	0.262794
chr10	115251887	115252499	0.509625	1.7437	1.77465	9015	9321	-	-9321	LOC100505998	498	3.97	up	0.0109	10000	up	0.159	2.53049	3.0373	0.26337
chr3	104078276	104078694	0.382219	1.05223	1.46099	142850	143059	+	143059	ENSG00000243635	567	0.1	up	0.945	0.48	up	0.402	1.69495	2.0353	0.263998
chr13	21288793	21289261	0.605179	1.77377	1.55138	458	692	+	692	IL17D	1944	0.43	up	0.00154	0.67	up	1.65e-06	3.3899	4.0706	0.263998
chr9	89347411	89348014	0.445922	1.65351	1.89067	36000	36301	-	-36301	ENSG00000232211	530	0	no	NA	0	no	NA	2.26789	2.72417	0.264466
chr9	122713250	122714051	0.350367	2.31492	2.72402	21322	21722	+	21722	ENSG00000225960	382	0	no	NA	0	no	NA	5.68167	6.82609	0.264744
chr7	115995092	115995593	0.605179	1.53326	1.34116	17796	18047	-	-18047	CAV2	466	0	no	NA	0	no	NA	3.12731	3.75748	0.264845
chr3	131854775	131855262	0.222961	1.29275	2.53558	38984	39228	+	39228	ENSG00000240854	1310	-0.09	down	0.595	0.02	up	0.958	3.41378	4.10192	0.264929
chr17	21065111	21065801	0.637031	2.04434	1.6822	3666	4011	+	4011	DHRS7B	744	0.41	up	0.11	0.62	up	0.0551	2.57824	3.09992	0.265847
chr1	183203635	183204576	0.541476	2.04434	1.91667	1916	2387	+	2387	LAMC2	973	-1.69	down	1.34e-78	-0.98	down	1.2e-15	4.63128	5.5736	0.267198
chr3	71586429	71586801	0.286664	1.0823	1.91667	5907	6093	+	6093	FOXP1	4967	-1.46	down	3.69e-71	-0.86	down	4.87e-47	3.19892	3.85142	0.267803
chr21	46378498	46379038	0.222961	1.50319	2.75317	337	607	-	-607	C21orf70	759	1.13	up	1.81e-19	0.54	up	0.00613	5.61005	6.76347	0.269748
chr6	37102347	37102756	0.477773	0.931979	0.963972	35166	35370	+	35370	PIM1	2709	-0.85	down	4.23e-15	-1.58	down	9.43e-70	3.58089	4.3211	0.271083
chr10	63843103	63843781	0.509625	1.86396	1.87086	1839	2178	+	2178	ARID5B	644	0.04	up	0.956	0.64	up	9.85e-05	3.00794	3.63223	0.272079
chr18	51675430	51676018	0.254812	1.26268	2.30898	1953	2247	+	2247	MBD2	5188	0.92	up	1.49e-81	0.26	up	0.0203	3.9151	4.72816	0.27223
chr7	130644806	130645600	0.286664	6.31341	4.46099	14437	14834	-	-14834	FLJ43663	803	-0.03	down	0.826	0.24	up	0.757	2.72147	3.2878	0.272733
chr7	34135771	34136394	0.382219	1.68358	2.13906	28926	29238	-	-29238	BMPER	538	-2.05	down	1.25e-32	-0.91	down	2.15e-05	1.81432	2.19186	0.272733
chr8	97111308	97111840	0.41407	1.53326	1.88865	29399	29665	-	-29665	ENSG00000183663	953	10000	up	1	-0.11	down	1	4.24932	5.13522	0.273196
chr4	57824283	57824878	0.41407	1.7437	2.07421	4638	4936	+	4936	C4orf14	2200	0.13	up	0.292	0.06	up	0.694	1.2175	1.47168	0.273541
chr7	104992416	104992908	0.254812	1.05223	2.04595	36433	36679	+	36679	SRPK2	666	-0.37	down	0.0465	-0.02	down	0.998	1.52784	1.84743	0.274021
chr6	86173823	86174367	0.350367	1.89402	2.43451	2411	2683	+	2683	NT5E	1639	-0.37	down	2.53e-09	0.01	up	1	4.29706	5.19785	0.274564
chr5	32810804	32811519	0.541476	2.52536	2.22152	18974	19332	-	-19332	NPR3	7450	1.6	up	5.71e-237	1.39	up	1.25e-105	4.01059	4.85341	0.275185
chr9	114774328	114774973	0.191109	1.80383	3.23859	20854	21176	+	21176	LOC158402	2765	1.17	up	0.00139	0.43	up	0.554	4.32093	5.22916	0.275236
chr2	38029979	38030876	0.350367	5.92258	4.07929	13182	13630	+	13630	ENSG00000225402	1047	0.9	up	6.83e-20	0.45	up	5.79e-05	4.63128	5.60491	0.275281
chr5	32582751	32583164	0.350367	0.751596	1.10109	2440	2647	+	2647	SUB1	3507	-0.34	down	8.28e-06	0.03	up	0.912	0.93103	1.12724	0.275901
chr15	81481917	81482541	0.350367	1.44306	2.0422	6678	6990	+	6990	IL16	8338	2.07	up	3.42e-152	-0.31	down	0.204	4.36868	5.29179	0.276557
chr7	36342861	36343359	0.318515	1.20255	1.91667	1709	1958	-	-1958	EEPD1	4765	0.9	up	1.03e-05	1.34	up	1.95e-19	2.19628	2.66155	0.277207
chr5	81147320	81147876	0.637031	1.50319	1.23859	-100	178	-	-178	ENSG00000249483	601	0	no	NA	0	no	NA	5.03711	6.10591	0.277609
chr5	172295713	172296601	0.477773	3.03645	2.66799	-170	274	-	-274	AK094980	2750	-0.42	down	1	0	no	NA	6.32623	7.67152	0.278167
chr12	96821033	96821609	0.254812	1.26268	2.30898	26667	26955	-	-26955	CDK17	4713	-0.65	down	8.41e-18	-0.19	down	0.141	3.48539	4.22717	0.278369
chr4	169687555	169688156	0.286664	1.38294	2.2703	8414	8714	+	8714	AK091193	3053	1.72	up	0.133	2.88	up	0.000226	2.93633	3.56961	0.281753
chr4	115193304	115193852	0.159258	1.11236	2.80419	167925	168199	-	-168199	ENSG00000248716	286	0	no	NA	0	no	NA	2.62598	3.19386	0.282443
chr4	129492831	129493334	0.191109	1.53326	3.00413	1144	1396	-	-1396	ENSG00000248187	1623	1.7	up	0.0626	1.03	up	0.698	2.9602	3.60092	0.282671
chr12	76099856	76100201	0.573328	1.77377	1.62938	16980	17152	-	-17152	ENSG00000234040	310	-0.77	down	1	10000	up	1	1.98142	2.41105	0.283125
chr1	235246473	235247176	0.318515	1.32281	2.05417	13326	13678	+	13678	ENSG00000233018	226	10000	up	1	0	no	NA	3.67638	4.47767	0.284463
chr1	39564122	39564643	0.637031	1.20255	0.916666	4010	4271	+	4271	MACF1/KIAA0754	834	0.11	up	1	10000	up	1	0.668432	0.814121	0.284463
chr2	150518412	150518808	0.350367	1.17249	1.74264	74082	74280	-	-74280	MMADHC	1437	0.06	up	0.606	-0.02	down	0.948	1.00265	1.22118	0.284463
chr2	43186340	43187263	0.254812	1.59338	2.64459	41198	41660	+	41660	ENSG00000224739	400	0	no	NA	0	no	NA	7.04241	8.57958	0.284839
chr11	19400396	19400784	0.254812	1.23262	2.27422	1247	1441	+	1441	ENSG00000255270	506	10000	up	0.663	0	no	NA	3.03182	3.69486	0.285336
chr6	122203069	122203990	0.41407	2.07441	2.32475	23160	23621	-	-23621	ENSG00000220184	513	10000	up	1	10000	up	1	3.05569	3.72617	0.286195
chr22	44529825	44530476	0.222961	2.04434	3.19677	980	1305	-	-1305	PARVB	742	0.04	up	0.857	0.15	up	0.624	4.77451	5.8241	0.28668
chr4	122611902	122612351	0.286664	1.59338	2.47466	4374	4599	-	-4599	ANXA5	724	0.66	up	4.92e-33	0.09	up	0.479	2.41113	2.94336	0.287755
chr15	68901956	68902481	0.700734	1.35287	0.949088	6398	6661	+	6661	CORO2B	3335	-1.5	down	3.5e-56	0	up	1	3.10343	3.78879	0.287873
chr20	42212480	42212944	0.286664	1.23262	2.10429	912	1144	+	1144	SGK2	1278	10000	up	0.663	-1.61	down	0.511	1.7427	2.12924	0.289016
chr8	117058973	117059451	0.573328	1.29275	1.17301	96237	96476	-	-96476	ENSG00000249917	2694	0	no	NA	0	no	NA	1.05039	1.28381	0.289498
chr14	32978766	32979481	0.382219	1.80383	2.23859	35804	36161	-	-36161	AKAP6	2274	-0.56	down	0.355	1.68	up	0.000975	2.10079	2.56761	0.289498
chr10	35742669	35743263	0.318515	1.59338	2.32266	9062	9359	-	-9359	CCNY	3974	-0.14	down	0.139	-0.21	down	0.0512	1.76657	2.16055	0.290449
chr1	201562363	201563062	0.350367	2.40511	2.77916	29350	29699	+	29699	NAV1	461	-0.23	down	0.412	0.07	up	1	3.96285	4.85341	0.292463
chr10	123283370	123283900	0.318515	1.413	2.14933	641	906	+	906	AK130287	2070	-10000	down	0.38	0	no	NA	1.81432	2.22318	0.293197
chr6	112162985	112163507	0.541476	1.7437	1.68718	2640	2901	+	2901	FYN	594	0.84	up	3.2e-21	0.41	up	0.00308	2.91245	3.56961	0.29353
chr6	141647545	141648040	0.159258	1.38294	3.1183	254766	255014	+	255014	AK097143	1654	0	no	NA	0	no	NA	2.19628	2.69286	0.294081
chr3	58033439	58034099	0.254812	2.28485	3.16459	28618	28948	+	28948	FLNB	5364	-0.86	down	1.11e-44	-0.3	down	0.000276	2.19628	2.69286	0.294081
chr6	119862153	119862757	0.191109	1.89402	3.30898	49686	49988	-	-49988	LOC285762	3469	-10000	down	0.639	0	no	NA	1.83819	2.25449	0.294516
chr4	67430887	67431302	0.445922	1.59338	1.83723	133648	133855	-	-133855	ENSG00000244099	430	0	no	NA	-10000	down	0.673	3.31829	4.0706	0.294804
chr2	147808715	147809312	0.541476	2.40511	2.15113	149216	149514	-	-149514	ENSG00000227902	532	0	no	NA	0	no	NA	0.74005	0.908058	0.295162
chr2	47194158	47194841	0.127406	2.13453	4.06641	10416	10757	+	10757	TTC7A	622	0.26	up	0.15	0.1	up	0.822	2.22015	2.72417	0.295162
chr5	167060815	167061576	0.573328	1.83389	1.67748	18656	19037	+	19037	ENSG00000254187	1124	-10000	down	0.639	0.44	up	0.852	3.3899	4.16454	0.296913
chr8	25771861	25772262	0.477773	1.23262	1.36733	5790	5991	-	-5991	EBF2	1177	2.02	up	2.02e-12	0.97	up	0.0988	3.03182	3.72617	0.297511
chr4	138626427	138626929	0.318515	1.11236	1.80419	14796	15047	-	-15047	ENSG00000250777	512	0	no	NA	0	no	NA	1.52784	1.87874	0.298268
chr11	8754169	8754743	0.286664	1.62345	2.50163	1452	1739	-	-1739	ST5	580	-0.1	down	1	-0.68	down	0.0837	1.52784	1.87874	0.298268
chr1	203275636	203276153	0.509625	1.44306	1.50163	972	1230	-	-1230	BTG2	2712	0.57	up	7.01e-12	0.34	up	0.00333	5.75329	7.07659	0.298667
chr6	2502385	2503069	0.41407	1.62345	1.97111	18121	18463	-	-18463	AK026794	2852	-0.45	down	0.663	1	up	0.315	3.84348	4.72816	0.298866
chr2	235889711	235890507	0.159258	2.28485	3.84267	-239	159	+	159	SH3BP4	829	0.25	up	0.00663	0.01	up	0.987	5.01324	6.16853	0.299184
chr20	17543256	17543840	0.159258	1.23262	2.95229	3651	3943	-	-3943	BFSP1	2063	1.96	up	1.89e-12	2.18	up	1.41e-12	2.31564	2.84942	0.29926
chr1	86077295	86077996	0.382219	1.77377	2.21435	10878	11229	-	-11229	ENSG00000230285	255	0	no	NA	-10000	down	0.673	5.06098	6.23116	0.300082
chr8	102979898	102980301	0.541476	1.65351	1.61056	7256	7457	+	7457	NCALD	548	-0.46	down	0.315	1.08	up	0.191	1.16976	1.44037	0.30023
chr8	116113190	116113551	0.445922	1.32281	1.56874	307174	307354	+	307354	TRPS1	9991	-0.41	down	3.78e-05	0.11	up	0.461	1.16976	1.44037	0.30023
chr3	31238206	31238735	0.509625	1.47313	1.53138	14064	14328	-	-14328	ENSG00000213854	900	-0.42	down	0.496	0.67	up	0.151	1.95755	2.41105	0.300612
chr17	33581273	33581888	0.350367	1.98421	2.50163	10666	10973	+	10973	SLFN5	1490	-0.13	down	0.273	-0.24	down	0.0622	0.787795	0.970683	0.30118
chr6	56803221	56803917	0.350367	1.80383	2.36413	15487	15835	+	15835	DST	10582	-0.24	down	0.0445	0.42	up	0.000227	2.36338	2.91205	0.30118
chr7	73265168	73265618	0.222961	1.17249	2.39471	8303	8528	-	-8528	WBSCR27	799	-2.98	down	0.000829	-0.33	down	0.579	2.79309	3.44436	0.302373
chr1	170278721	170279076	0.286664	1.7437	2.60472	25372	25549	-	-25549	LOC284688	1725	0	no	NA	-10000	down	0.673	3.24667	4.00798	0.303915
chr2	107611976	107612372	0.445922	0.962043	1.10931	31846	32044	-	-32044	ENSG00000226905	482	0	no	NA	0	no	NA	0.405834	0.500997	0.303915
chr1	208357276	208358237	0.222961	2.94626	3.72402	25096	25576	+	25576	PLXNA2	756	3	up	6.54e-117	2.54	up	1.74e-32	4.48804	5.54228	0.304394
chr12	78241870	78242326	0.286664	1.23262	2.10429	16801	17029	-	-17029	NAV3	9758	0.58	up	9.25e-18	1.09	up	1.92e-65	2.05304	2.5363	0.304963
chr22	44756679	44757351	0.191109	1.35287	2.82356	4080	4416	+	4416	ENSG00000220702	606	1.86	up	0.484	-0.38	down	1	6.58883	8.14121	0.305221
chr18	52940056	52940539	0.382219	1.32281	1.79114	6360	6601	+	6601	TCF4	1717	-0.13	down	0.389	-0.21	down	0.229	1.64721	2.0353	0.305221
chr10	74490244	74490857	0.191109	1.71364	3.16459	18182	18488	-	-18488	CCDC109A	2882	-0.06	down	0.613	0.21	up	0.0501	1.67108	2.06661	0.306489
chr11	114179357	114179857	0.541476	1.47313	1.44391	-3	247	+	247	AK055557	2205	0.63	up	0.0124	-0.1	down	0.824	3.84348	4.75948	0.308388
chr3	101900351	101900715	0.222961	1.29275	2.53558	5824	6006	-	-6006	ENSG00000170044	514	0	no	NA	10000	up	1	3.43765	4.25848	0.308916
chr9	74998975	74999277	0.0955546	0.751596	2.97556	18812	18963	-	-18963	ZFAND5	5728	-0.34	down	4.09e-07	-0.14	down	0.17	1.7427	2.16055	0.310078
chr19	11279111	11279609	0.254812	0.992107	1.96106	1352	1601	-	-1601	KANK2	2628	0.52	up	3.3e-18	0.19	up	0.103	1.33686	1.65955	0.311943
chr15	91223441	91224076	0.222961	1.77377	2.99195	34864	35181	-	-35181	CRTC3	5171	-0.01	down	1	-0.12	down	0.504	4.08221	5.0726	0.313375
chr12	94288136	94288851	0.541476	1.77377	1.71185	-348	9	+	9	CRADD	1077	-0.32	down	0.21	0.05	up	0.973	3.6525	4.54029	0.313899
chr2	227525262	227525693	0.286664	1.14243	1.99467	70340	70555	+	70555	IRS1	8736	-0.65	down	6.43e-19	-0.37	down	5.38e-06	1.83819	2.2858	0.314416
chr1	245934843	245935697	0.41407	1.92409	2.21623	7500	7927	-	-7927	SMYD3	823	-1.45	down	2.87e-39	-2.03	down	3.84e-85	1.83819	2.2858	0.314416
chr16	48160844	48161470	0.477773	1.62345	1.76466	5693	6006	-	-6006	ABCC12	2391	0	no	NA	0	no	NA	3.2228	4.00798	0.314562
chr4	126289682	126290302	0.445922	1.7437	1.96729	24789	25099	+	25099	FAT4	9669	0.49	up	1.64e-10	0.52	up	1.08e-07	1.86206	2.31711	0.315429
chr3	177243897	177244401	0.191109	1.413	2.88629	84145	84397	-	-84397	LOC100505566/LOC100508527	542	10000	up	0.663	0.41	up	1	4.67902	5.8241	0.315827
chr2	228231688	228232088	0.254812	0.931979	1.87086	4808	5008	-	-5008	TM4SF20	2286	1.77	up	6.7e-12	0.68	up	0.683	2.81696	3.50698	0.31609
chr15	89595124	89596000	0.445922	1.29275	1.53558	35381	35819	+	35819	ABHD2	9133	0.59	up	5.92e-29	0.19	up	0.043	2.84084	3.53829	0.316739
chr17	56025928	56026501	0.573328	1.53326	1.41917	6184	6470	+	6470	CUEDC1	1888	0.64	up	4.14e-25	0.44	up	1.19e-06	3.86736	4.8221	0.318314
chr12	113342243	113342900	0.191109	3.69785	4.27422	1838	2167	+	2167	OAS1	1565	-2.43	down	3.74e-135	-2.52	down	2.91e-63	0.978775	1.22118	0.319228
chr7	111839075	111839501	0.573328	1.23262	1.10429	6948	7161	+	7161	DOCK4	3218	-0.53	down	0.013	-0.35	down	0.267	0.978775	1.22118	0.319228
chr17	40561486	40562076	0.318515	1.62345	2.34963	4781	5076	-	-5076	PTRF	1332	-0.22	down	0.003	0.3	up	0.000526	1.95755	2.44236	0.319228
chr1	8537560	8538012	0.541476	1.77377	1.71185	12530	12756	-	-12756	RERE	2710	-0.72	down	0.000263	-0.06	down	0.941	2.0053	2.50499	0.320988
chr15	58762000	58762476	0.350367	1.29275	1.8835	28458	28696	+	28696	AK091917	2215	-0.71	down	1	10000	up	0.752	4.08221	5.10391	0.322253
chr11	106269889	106270426	0.41407	1.89402	2.19351	87372	87640	-	-87640	ENSG00000255065	1469	-0.04	down	1	0.32	up	0.512	4.10608	5.13522	0.322665
chr10	3511102	3511709	0.318515	1.59338	2.32266	17376	17680	+	17680	ENSG00000233321	832	0	no	NA	0	no	NA	3.60476	4.50898	0.322898
chr2	224330412	224330979	0.350367	1.80383	2.36413	32512	32795	+	32795	ENSG00000231189	808	0	no	NA	0	no	NA	1.55172	1.94137	0.323206
chr17	47592549	47593151	0.477773	1.44306	1.59474	167	468	-	-468	NGFR	3420	-0.87	down	0.0292	0.14	up	1	2.60211	3.25648	0.323633
chr1	14813100	14813825	0.254812	2.34498	3.20207	84352	84715	-	-84715	AK026284	1910	0	no	NA	0	no	NA	2.60211	3.25648	0.323633
chr17	76412551	76412915	0.541476	1.14243	1.07713	1468	1650	-	-1650	PGS1	1549	0.08	up	0.731	-0.15	down	0.462	3.6525	4.5716	0.323814
chr2	205317252	205317751	0.605179	1.23262	1.02629	17048	17297	+	17297	ENSG00000236634	588	0	no	NA	0	no	NA	1.05039	1.31512	0.324264
chr11	63435494	63435965	0.191109	1.23262	2.68926	2842	3077	+	3077	ATL3	1815	0.53	up	8.95e-18	0.48	up	1.52e-08	2.10079	2.63024	0.324264
chr14	71964263	71964711	0.286664	1.11236	1.95619	7832	8056	-	-8056	LOC145474	1854	0	no	NA	10000	up	1	2.10079	2.63024	0.324264
chr7	36155176	36155806	0.318515	1.62345	2.34963	4694	5009	-	-5009	ENSG00000228815	1849	0	no	NA	-10000	down	0.673	4.22544	5.29179	0.324652
chr10	73769040	73769689	0.605179	2.37504	1.97252	1326	1650	+	1650	CHST3	2303	0.09	up	0.278	0.09	up	0.398	5.32358	6.66953	0.325187
chr6	91078598	91079252	0.445922	1.65351	1.89067	71971	72298	-	-72298	BACH2	2961	-1.14	down	0.172	-1.85	down	0.0135	1.64721	2.06661	0.327247
chr6	2504366	2504726	0.445922	1.53326	1.78174	20102	20282	-	-20282	AK026794	2852	-0.45	down	0.663	1	up	0.315	2.19628	2.75549	0.327247
chr6	136043192	136043727	0.286664	1.71364	2.57963	31216	31484	-	-31484	NCRNA00271	1636	-1.88	down	0.13	0.86	up	0.673	0.572942	0.720184	0.329977
chr15	58506201	58506613	0.350367	0.962043	1.45723	84	290	-	-290	AK095426	2229	0	no	NA	10000	up	1	1.71882	2.16055	0.329977
chr19	8420294	8421066	0.254812	5.53175	4.44023	7046	7432	+	7432	ANGPTL4	1578	1.83	up	1.33e-281	1.68	up	2.04e-151	1.16976	1.47168	0.331257
chr7	43012290	43013439	0.668883	4.26907	2.6741	424	998	-	-998	ENSG00000232006	636	0	no	NA	0	no	NA	1.79044	2.25449	0.332484
chr5	157811816	157812500	0.318515	2.22472	2.80419	39093	39435	+	39435	ENSG00000254350	706	0	no	NA	0	no	NA	2.38726	3.00598	0.332484
chr16	4151532	4152188	0.445922	1.47313	1.72402	13998	14326	+	14326	ADCY9	7727	0.21	up	0.00599	0.12	up	0.321	1.2175	1.5343	0.333662
chr15	63226450	63226949	0.254812	1.47313	2.53138	18422	18672	+	18672	ENSG00000213712	950	0.09	up	0.796	0.08	up	0.927	4.89388	6.16853	0.333949
chr20	46644666	46645158	0.254812	1.26268	2.30898	27178	27424	-	-27424	ENSG00000237423	429	0	no	NA	-10000	down	0.673	2.45887	3.09992	0.334234
chr13	110896435	110896840	0.350367	1.44306	2.0422	9912	10114	-	-10114	AK000903	1410	10000	up	1	-10000	down	0.673	1.24137	1.56562	0.334794
chr1	12538151	12538746	0.41407	1.7437	2.07421	-142	156	+	156	VPS13D	1505	0.49	up	0.00149	-0.09	down	0.794	1.88593	2.37974	0.335524
chr10	93109027	93109556	0.541476	1.20255	1.15113	42308	42573	-	-42573	LOC100188947	1023	-0.06	down	1	1.65	up	0.435	4.46417	5.63622	0.336336
chr4	114318310	114318705	0.350367	1.14243	1.70516	13414	13612	-	-13612	ANK2	8082	-0.92	down	3.36e-31	-0.93	down	1.5e-19	3.96285	5.00997	0.338266
chr10	31364410	31364751	0.286664	1.53326	2.41917	43544	43714	-	-43714	ZNF438	3249	0.5	up	0.00239	0.27	up	0.0987	3.96285	5.00997	0.338266
chr18	42834676	42835191	0.254812	1.62345	2.67155	41716	41974	-	-41974	SLC14A2	3540	3.31	up	0.00249	0.4	up	0.951	5.32358	6.73215	0.338671
chr15	70784921	70785457	0.286664	1.44306	2.3317	66062	66330	-	-66330	LOC283674	1574	10000	up	1	0	no	NA	5.99201	7.57759	0.338697
chr2	37995130	37996126	0.286664	2.61555	3.18968	20941	21439	-	-21439	ENSG00000236572	385	0	no	NA	0	no	NA	5.99201	7.57759	0.338697
chr1	205144490	205145030	0.477773	1.20255	1.3317	1998	2268	-	-2268	DSTYK	994	-0.69	down	0.00162	-0.31	down	0.4	1.36074	1.72218	0.339847
chr6	1767591	1768113	0.286664	1.11236	1.95619	24771	25032	-	-25032	GMDS	216	-0.37	down	0.112	0.11	up	0.64	1.36074	1.72218	0.339847
chr3	51377643	51378410	0.573328	1.56332	1.44718	344	727	+	727	DOCK3	1051	0.23	up	1	-1.03	down	0.362	4.77451	6.04328	0.339979
chr2	42345226	42345759	0.286664	1.62345	2.50163	24620	24886	+	24886	ENSG00000224875	657	-10000	down	0.214	0.82	up	0.852	2.05304	2.59892	0.340152
chr1	98366503	98366954	0.318515	1.35287	2.08659	17572	17798	-	-17798	DPYD	4263	0.49	up	2.25e-10	0.23	up	0.0308	2.05304	2.59892	0.340152
chr1	183911930	183912501	0.254812	1.413	2.47126	2066	2351	-	-2351	GLT25D2	587	0.76	up	0.11	0.38	up	0.844	2.19628	2.7868	0.343549
chr4	77905968	77906623	0.222961	2.01428	3.1754	-208	119	-	-119	2011-09-01	610	0.07	up	0.502	0.78	up	2.61e-23	2.93633	3.72617	0.343681
chr17	57863812	57864509	0.41407	1.98421	2.26062	21084	21433	-	-21433	VMP1	598	0.13	up	0.325	0.15	up	0.711	3.70025	4.69685	0.344072
chr1	78744682	78745301	0.254812	1.95415	2.93903	14272	14582	+	14582	MGC27382	1993	0.1	up	1	-10000	down	0.673	2.29177	2.91205	0.345574
chr16	64474224	64474819	0.350367	2.04434	2.5447	173892	174190	-	-174190	FLJ20032	888	0.26	up	0.816	-0.05	down	1	2.38726	3.0373	0.347434
chr20	52961721	52962156	0.159258	1.23262	2.95229	117130	117347	-	-117347	PFDN4	579	-0.43	down	0.000327	-0.27	down	0.0622	1.62333	2.06661	0.348309
chr2	29886212	29886651	0.350367	1.38294	1.9808	53790	54010	+	54010	ALK	1716	0.8	up	1	-10000	down	0.673	2.45887	3.13123	0.348733
chr5	39494338	39494814	0.541476	1.38294	1.35277	31936	32174	-	-32174	C9/DAB2	551	-1.78	down	9.53e-145	-0.3	down	0.00586	1.67108	2.12924	0.349558
chr1	86094375	86094976	0.41407	1.47313	1.83094	20130	20430	+	20430	ZNHIT6	6080	0.19	up	0.0512	0.09	up	0.393	4.22544	5.38572	0.350037
chr3	29426005	29426711	0.254812	1.59338	2.64459	5628	5981	+	5981	ENSG00000226216	371	0	no	NA	0	no	NA	1.71882	2.19186	0.350736
chr7	47644457	47644992	0.191109	0.962043	2.3317	11130	11398	-	-11398	TNS3	3079	2.22	up	0	1.44	up	1.58e-92	2.86471	3.66354	0.354852
chr12	123612347	123612836	0.127406	1.11236	3.12612	17372	17617	-	-17617	PITPNM2	6736	0.03	up	0.844	-0.07	down	0.575	1.98142	2.5363	0.356188
chr9	89677901	89678573	0.254812	1.7437	2.77465	20228	20564	+	20564	LOC494127	1340	-0.26	down	0.518	-0.34	down	0.644	3.07956	3.94536	0.35743
chr7	65746595	65747139	0.382219	1.56332	2.03214	40761	41033	-	-41033	TPST1	562	-0.21	down	0.139	-0.59	down	4.9e-05	2.07691	2.66155	0.357825
chr9	82676909	82677301	0.286664	1.44306	2.3317	27439	27635	-	-27635	ENSG00000230945	446	0	no	NA	0	no	NA	2.12466	2.72417	0.358588
chr12	58704535	58705187	0.127406	1.56332	3.61711	65893	66219	-	-66219	ENSG00000241423	418	10000	up	1	0	no	NA	1.07427	1.37774	0.358956
chr9	95268441	95269037	0.350367	1.56332	2.15767	-290	8	-	-8	ECM2	1475	1.77	up	6.59e-70	0.36	up	0.12	3.2228	4.13323	0.358956
chr13	95923599	95924001	0.286664	1.65351	2.5281	23584	23785	-	-23785	ABCC4	3763	1.27	up	3.91e-46	1.3	up	9.17e-48	2.19628	2.81811	0.359669
chr15	59587372	59588823	0.222961	4.84028	4.44023	5516	6242	-	-6242	AK130223	1464	0	no	NA	0	no	NA	4.58353	5.88672	0.361004
chr20	33895686	33896484	0.509625	1.92409	1.91667	130	529	+	529	UQCC	483	-0.08	down	0.786	-0.12	down	0.746	4.67902	6.01197	0.36163
chr17	48716376	48717152	0.254812	1.71364	2.74956	3100	3488	-	-3488	ABCC3	656	3.1	up	7.06e-05	1.76	up	0.371	3.53314	4.54029	0.361833
chr11	128452677	128453255	0.477773	1.35287	1.50163	4163	4452	+	4452	ETS1	372	0	no	NA	0	no	NA	1.19363	1.5343	0.362231
chr8	49565588	49565976	0.222961	1.413	2.6639	3844	4038	+	4038	ENSG00000253892	594	0	no	NA	0	no	NA	2.48275	3.19386	0.363363
chr19	6273659	6274403	0.254812	1.59338	2.64459	2876	3248	-	-3248	MLLT1	1672	0.74	up	7.53e-34	0.11	up	0.252	6.32623	8.14121	0.363897
chr1	67600887	67601477	0.350367	1.71364	2.29012	7943	8238	-	-8238	C1orf141	2266	0	no	NA	0	no	NA	1.28912	1.65955	0.364411
chr8	26466766	26467373	0.668883	2.13453	1.6741	4292	4596	+	4596	AK130260	3362	10000	up	1	0	no	NA	5.18035	6.66953	0.364536
chr6	45593999	45594326	0.382219	1.59338	2.05962	75180	75343	-	-75343	RUNX2	5487	0	up	1	-0.57	down	1.61e-08	2.74535	3.53829	0.366067
chr3	158427344	158427801	0.286664	2.1646	2.91667	860	1089	+	1089	RARRES1	366	-4.27	down	1.39e-12	-1.75	down	0.000152	1.40848	1.81612	0.366716
chr2	12674733	12675462	0.350367	1.68358	2.26459	25928	26293	+	26293	LOC100506457	578	0	no	NA	0	no	NA	2.84084	3.66354	0.366925
chr10	111658389	111658919	0.41407	1.56332	1.91667	5138	5403	-	-5403	XPNPEP1	481	-0.3	down	0.0365	-0.16	down	0.504	3.10343	4.00798	0.36901
chr11	95245243	95246178	0.350367	2.52536	2.84955	242664	243132	-	-243132	SESN3	1924	1.68	up	4.34e-47	0.83	up	0.0212	1.57559	2.0353	0.369351
chr8	37901336	37901851	0.509625	0.992107	0.96106	3006	3263	+	3263	EIF4EBP1	695	-0.58	down	2.08e-14	-1	down	8.86e-31	1.71882	2.22318	0.3712
chr10	60616100	60616620	0.222961	1.0823	2.27924	24905	25165	-	-25165	BICC1	5473	0.74	up	2.37e-42	0.23	up	0.0241	3.50927	4.54029	0.371614
chr2	85969067	85970068	0.350367	2.19466	2.64706	8398	8899	+	8899	ATOH8	1889	1.94	up	1.58e-240	1.27	up	1.58e-60	5.29971	6.8574	0.371749
chr11	61772783	61773235	0.222961	1.05223	2.23859	5988	6214	+	6214	ENSG00000244176	852	-10000	down	0.639	10000	up	0.752	2.10079	2.72417	0.37489
chr2	238116881	238117401	0.445922	2.55543	2.5187	4779	5039	-	-5039	ENSG00000224132	775	0	no	NA	-10000	down	0.4	2.84084	3.69486	0.379203
chr5	148345148	148345749	0.637031	1.50319	1.23859	10784	11084	-	-11084	SH3TC2	316	10000	up	0.147	-1.37	down	0.799	2.84084	3.69486	0.379203
chr3	111521818	111522561	0.350367	1.62345	2.21212	24514	24885	-	-24885	PHLDB2/PLCXD2	434	-10000	down	0.639	0	no	NA	3.24667	4.22717	0.38073
chr3	124597404	124598360	0.605179	3.42728	2.50163	4876	5354	-	-5354	ITGB5	3071	0.43	up	6.42e-14	0.27	up	0.00285	3.3899	4.41504	0.381182
chr1	8963997	8964326	0.191109	0.992107	2.3761	3180	3344	+	3344	ENSG00000232208	298	0	no	NA	0	no	NA	3.98672	5.19785	0.382713
chr1	235106148	235107203	0.286664	3.96843	3.79114	6402	6930	-	-6930	ENSG00000238005	889	-0.32	down	0.709	-0.22	down	1	4.79839	6.26247	0.384182
chr2	47194994	47195527	0.127406	1.71364	3.74956	9730	9997	+	9997	TTC7A	622	0.26	up	0.15	0.1	up	0.822	2.62598	3.44436	0.391378
chr6	37772339	37772753	0.318515	1.0823	1.76466	10800	11007	+	11007	ENSG00000225945	419	0.23	up	1	0	no	NA	0.262598	0.344436	0.391378
chr10	100074272	100074835	0.637031	1.35287	1.08659	45814	46095	-	-46095	LOXL4	2349	-1.37	down	7.27e-90	-0.67	down	5.04e-12	2.88858	3.78879	0.391378
chr2	62241178	62241651	0.318515	1.38294	2.1183	12950	13187	-	-13187	COMMD1	604	-0.16	down	0.203	0.13	up	0.34	0.644559	0.845433	0.391378
chr17	1250994	1251294	0.254812	0.841788	1.72402	2296	2446	-	-2446	YWHAE	880	-0.04	down	0.606	0.17	up	0.0839	0.811667	1.06462	0.391378
chr12	52279727	52280120	0.191109	0.811724	2.08659	-124	72	-	-72	ANKRD33	1971	-10000	down	0.639	-10000	down	0.673	1.2175	1.59693	0.391378
chr14	56054881	56055614	0.318515	2.34498	2.88014	7840	8206	-	-8206	KTN1	4134	0.41	up	1.14e-11	0.07	up	0.552	0.572942	0.751496	0.391378
chr21	36935983	36936706	0.350367	2.73581	2.96503	16356	16718	+	16718	RUNX1	457	0	no	NA	0	no	NA	3.10343	4.0706	0.391378
chr5	75986692	75987378	0.382219	3.69785	3.27422	-114	229	+	229	ENSG00000225407	600	-10000	down	0.38	0	no	NA	2.98407	3.91404	0.391378
chr7	33782955	33783682	0.445922	2.13453	2.25906	11278	11642	-	-11642	ENSG00000227481	577	0	no	NA	0	no	NA	3.79574	4.97866	0.391378
chr9	84108021	84108420	0.350367	1.56332	2.15767	4268	4468	-	-4468	ENSG00000237072	530	0	no	NA	0	no	NA	0.477451	0.626247	0.391378
chr10	104542352	104543425	0.509625	5.26117	3.36788	6346	6882	-	-6882	C10orf26	4104	1.54	up	1.74e-159	0.75	up	1.2e-28	2.79309	3.66354	0.391378
chr10	5465685	5466043	0.222961	0.992107	2.15371	2573	2752	+	2752	NET1	1709	-2.37	down	6.65e-273	-0.91	down	4.81e-26	1.26525	1.65955	0.391378
chr17	34040251	34040681	0.445922	1.11236	1.31876	6226	6441	+	6441	ENSG00000239520	555	-1.86	down	0.535	-0.07	down	1	1.7427	2.2858	0.391378
chr17	61433589	61434051	0.41407	2.1646	2.38615	1173	1404	-	-1404	TANC2	3018	0.74	up	0.00229	0.62	up	0.0144	2.0053	2.63024	0.391378
chr9	96220966	96221562	0.445922	1.98421	2.15371	675	973	+	973	ENSG00000227457	151	0	no	NA	0	no	NA	0.620687	0.814121	0.391378
chr5	123036171	123037030	0.350367	1.92409	2.45723	63074	63503	-	-63503	ENSG00000235275	1294	0	no	NA	-10000	down	0.673	3.12731	4.10192	0.391378
chr17	46588007	46588731	0.0637031	1.83389	4.8474	18066	18428	+	18428	HOXB1	1111	0	no	NA	0	no	NA	0.716177	0.93937	0.391378
chr2	109741776	109742567	0.318515	2.76587	3.1183	1216	1611	+	1611	LOC100287216	2793	2.4	up	1.53e-209	0.84	up	2.93e-08	1.90981	2.50499	0.391378
chrx	135212950	135213481	0.191109	1.05223	2.46099	999999999	999999999	?	1									0.501324	0.657559	0.391378
chr9	33946692	33947242	0.318515	1.32281	2.05417	1134	1409	+	1409	UBAP2	828	-0.12	down	0.949	-0.3	down	0.141	0.668432	0.876746	0.391378
chr21	39635277	39635906	0.350367	1.56332	2.15767	6286	6601	-	-6601	KCNJ15	1516	1.26	up	1.29e-14	0.23	up	0.544	5.44295	7.17053	0.397691
chr13	101961429	101962052	0.286664	2.58549	3.17301	25062	25374	-	-25374	NALCN	1663	1.44	up	1.79e-10	0.7	up	0.0955	5.1326	6.76347	0.398072
chr2	106021828	106022176	0.382219	1.32281	1.79114	5704	5878	-	-5878	FHL2	4881	0.2	up	0.00189	0.22	up	0.0121	5.08486	6.70084	0.398135
chr7	40867001	40867632	0.637031	1.56332	1.29518	19244	19560	-	-19560	C7orf10	452	0.29	up	0.147	-0.01	down	0.98	4.72677	6.23116	0.398646
chr6	148822222	148822770	0.541476	1.38294	1.35277	7130	7404	+	7404	SASH1	2520	0.06	up	0.832	-0.55	down	1.53e-07	3.93897	5.19785	0.400095
chr5	81709335	81709915	0.541476	1.44306	1.41417	26539	26829	-	-26829	ATP6AP1L/FLJ41309	3524	-0.33	down	0.639	0.01	up	0.863	3.9151	5.16654	0.400148
chr14	100497793	100498676	0.286664	1.92409	2.74674	12074	12515	-	-12515	EVL	1571	-0.62	down	1.09e-06	-0.6	down	2.13e-05	3.36603	4.44635	0.401573
chr3	16101552	16102400	0.445922	2.826	2.6639	87271	87695	-	-87695	AK098349	1355	0.87	up	0.411	-0.13	down	1	5.37133	7.1079	0.404145
chr19	18570521	18570931	0.318515	0.931979	1.54893	9233	9438	-	-9438	ELL	1041	-0.36	down	0.0282	-0.3	down	0.149	2.60211	3.44436	0.404553
chr13	45478983	45479683	0.509625	4.29913	3.07654	33701	34051	+	34051	NUFIP1	3487	-0.33	down	0.0757	0.04	up	1	2.57824	3.41305	0.404675
chr3	72395723	72396183	0.254812	1.7437	2.77465	27561	27791	+	27791	RYBP	4744	0.21	up	0.017	0.07	up	0.679	2.50662	3.31911	0.405053
chr1	183811513	183812011	0.286664	1.23262	2.10429	4686	4935	+	4935	RGL1	2287	-0.15	down	0.225	-0.4	down	0.00186	2.45887	3.25648	0.405317
chr10	74856599	74857027	0.605179	1.20255	0.990667	-133	81	-	-81	P4HA1	2851	-1.2	down	3.01e-94	-1.07	down	9.07e-71	4.89388	6.48166	0.405385
chr1	225887744	225888431	0.222961	1.92409	3.10931	-126	218	+	218	ENSG00000227496	1530	2.16	up	2.26e-51	2.05	up	1.1e-48	4.58353	6.07459	0.406328
chr10	104536576	104537257	0.286664	3.42728	3.57963	570	910	-	-910	C10orf26	4104	1.54	up	1.74e-159	0.75	up	1.2e-28	4.32093	5.73016	0.407232
chr2	45404810	45405415	0.318515	1.95415	2.61711	2460	2762	-	-2762	UNQ6975	343	0.24	up	1	0.39	up	1	3.89123	5.16654	0.408972
chr2	1733839	1734662	0.318515	1.89402	2.57202	13552	13964	+	13964	PXDN	2643	0.1	up	0.208	0.17	up	0.0603	3.81961	5.0726	0.4093
chr1	234752983	234753427	0.286664	1.44306	2.3317	7712	7934	-	-7934	IRF2BP2	4615	-0.25	down	0.00115	-0.27	down	0.00233	3.70025	4.91604	0.409874
chr9	82301526	82302319	0.541476	1.62345	1.58409	14306	14703	+	14703	AK128764	2330	-2.45	down	0.223	0.72	up	0.673	1.67108	2.22318	0.411842
chr15	66124921	66125601	0.445922	1.86396	2.06351	15884	16224	-	-16224	ENSG00000224578	441	0	no	NA	0	no	NA	1.67108	2.22318	0.411842
chr15	40074774	40075234	0.732586	1.20255	0.715032	-214	16	+	16	FSIP1	2032	0.56	up	0.266	0.62	up	0.367	3.31829	4.41504	0.411988
chr7	112124796	112125227	0.254812	1.32281	2.3761	950	1166	+	1166	IFRD1/C7orf53	604	0.92	up	0.863	-0.92	down	0.53	1.62333	2.16055	0.412439
chr12	6445437	6445951	0.382219	1.47313	1.94641	1669	1926	+	1926	TNFRSF1A	1926	0.16	up	0.0239	-0.16	down	0.16	6.44559	8.57958	0.412594
chr9	112903701	112904126	0.0955546	1.14243	3.57963	2996	3208	-	-3208	AKAP2	2520	-0.04	down	0.639	0.13	up	0.281	1.57559	2.09793	0.413073
chr2	190150866	190151354	0.318515	1.11236	1.80419	24635	24879	+	24879	ENSG00000213601	705	0	no	NA	10000	up	1	3.10343	4.13323	0.413404
chr14	104043004	104043351	0.605179	0.992107	0.713133	1936	2109	-	-2109	KLC1/C14orf153	653	0.21	up	0.209	0.39	up	0.0786	1.38461	1.84743	0.41604
chr18	3453644	3454297	0.191109	1.83389	3.26244	-128	198	-	-198	TGIF1	1357	0.38	up	1.18e-06	0	down	1	2.60211	3.47567	0.417609
chr6	45864745	45865128	0.605179	1.44306	1.2537	1060	1252	+	1252	CLIC5	5976	10000	up	0.146	0	no	NA	1.26525	1.69087	0.418345
chr7	40803324	40803804	0.41407	1.38294	1.73979	11353	11593	+	11593	LOC100506829	375	0	no	NA	0	no	NA	3.77187	5.04129	0.418514
chr7	115957198	115957732	0.191109	1.35287	2.82356	5145	5412	+	5412	CAV2	531	0	no	NA	0	no	NA	2.38726	3.19386	0.419947
chr1	235147438	235147851	0.350367	1.35287	1.94909	47692	47898	-	-47898	ENSG00000238005	889	-0.32	down	0.709	-0.22	down	1	3.55701	4.75948	0.420137
chr20	30654937	30655476	0.509625	1.35287	1.40852	3988	4257	+	4257	HCK	1518	4.58	up	3e-295	3.44	up	4.55e-64	2.31564	3.09992	0.420821
chr21	39713476	39714030	0.41407	1.20255	1.53815	8133	8410	-	-8410	ENSG00000231231	423	-1.51	down	0.00609	-1.26	down	0.00139	3.2228	4.3211	0.423087
chr11	85800710	85801137	0.445922	1.26268	1.50163	19810	20024	-	-20024	PICALM	2025	-0.12	down	0.149	0.42	up	6.86e-09	1.07427	1.44037	0.423087
chr20	46173594	46173967	0.254812	0.721532	1.50163	8396	8583	-	-8583	AK057126	2090	0	no	NA	0	no	NA	1.05039	1.40906	0.423799
chr20	49951822	49952371	0.41407	1.35287	1.70808	51124	51398	+	51398	NFATC2	7437	0.85	up	0.00931	0.69	up	0.0171	3.9151	5.26047	0.426143
chr16	12895279	12895842	0.286664	1.26268	2.13906	1828	2109	+	2109	CPPED1	1541	0.83	up	1.89e-53	1.06	up	7.95e-47	2.91245	3.91404	0.426425
chr1	186781737	186782078	0.0955546	0.962043	3.3317	15954	16124	+	16124	PLA2G4A	2738	-0.54	down	5.58e-08	-0.62	down	4.09e-09	1.93368	2.59892	0.426567
chr22	29107881	29108742	0.159258	2.40511	3.91667	-364	67	-	-67	CHEK2	609	0.42	up	0.206	0.08	up	0.799	3.79574	5.10391	0.427223
chr4	122649205	122649827	0.286664	2.04434	2.8342	30258	30569	+	30569	TMEM155	2316	0.96	up	3.02e-05	-0.74	down	0.00807	1.86206	2.50499	0.427904
chr3	64277716	64278051	0.445922	2.22472	2.31876	24062	24229	-	-24229	PRICKLE2	573	0.61	up	0.249	-0.22	down	0.92	1.7427	2.34843	0.430372
chr10	71951501	71952103	0.254812	1.20255	2.23859	6641	6942	+	6942	ENSG00000232142	252	10000	up	1	0	no	NA	3.43765	4.63423	0.430906
chr8	38483554	38484210	0.350367	2.79594	2.99639	24779	25107	-	-25107	RNF5P1	1085	-0.22	down	0.286	0	down	0.981	2.50662	3.38173	0.43202
chr12	6324896	6325597	0.668883	1.56332	1.22479	8556	8906	+	8906	CD9	1280	0.68	up	3.02e-32	0.26	up	0.00799	4.12995	5.5736	0.432483
chr3	155630548	155631001	0.382219	1.05223	1.46099	1948	2175	-	-2175	GMPS	570	0.28	up	0.107	-0.01	down	0.962	1.59946	2.16055	0.433813
chr9	113758685	113759476	0.222961	2.25479	3.33813	2270	2666	+	2666	LPAR1	2995	0.38	up	1.05e-08	0.67	up	3.53e-25	2.38726	3.22517	0.434022
chr5	158128417	158129657	0.222961	3.2469	3.8642	1993	2613	+	2613	AK130895	2388	0.16	up	1	1.82	up	0.673	4.75064	6.41903	0.434233
chr18	33058544	33058901	0.318515	1.50319	2.23859	10116	10295	-	-10295	INO80C	904	0.12	up	0.277	0.09	up	0.59	3.93897	5.3231	0.434446
chr4	114366352	114366880	0.222961	1.77377	2.99195	5308	5572	+	5572	CAMK2D	5294	-0.54	down	4.45e-19	0.01	up	0.946	3.15118	4.25848	0.434446
chr15	62895836	62896342	0.318515	1.35287	2.08659	13951	14204	-	-14204	TLN2	7739	-0.77	down	6.58e-21	-0.24	down	0.0681	2.29177	3.09992	0.435772
chr7	114649592	114650282	0.41407	2.79594	2.75539	5537	5882	+	5882	MDFIC	584	0.34	up	0.00144	0.24	up	0.12	1.52784	2.06661	0.435772
chr8	69833193	69833693	0.159258	1.29275	3.021	2945	3195	+	3195	LOC100505718	437	1.27	up	0.416	10000	up	1	4.51192	6.10591	0.436466
chr7	104836788	104837276	0.445922	1.50319	1.75317	6798	7042	+	7042	SRPK2	505	-0.57	down	0.0312	-0.08	down	0.752	0.74005	1.00199	0.437181
chr1	215196053	215197052	0.477773	2.25479	2.23859	16854	17354	-	-17354	KCNK2	1410	-0.51	down	5.15e-15	0.04	up	0.8	2.93633	3.97667	0.437548
chr3	157077699	157078299	0.286664	2.28485	2.99467	2783	3083	+	3083	VEPH1	648	-0.57	down	0.0797	-0.5	down	0.4	2.81696	3.82011	0.439472
chr12	123610920	123611645	0.286664	1.56332	2.44718	15944	16307	-	-16307	PITPNM2	6736	0.03	up	0.844	-0.07	down	0.575	2.81696	3.82011	0.439472
chr19	8488788	8489110	0.127406	0.691469	2.44023	2181	2342	-	-2342	MARCH2	1324	0.62	up	3.45e-12	0.73	up	2.98e-12	1.38461	1.87874	0.440287
chr11	19395701	19396212	0.350367	1.17249	1.74264	5820	6075	+	6075	ENSG00000255270	506	10000	up	0.663	0	no	NA	2.72147	3.69486	0.441131
chr2	100264701	100265275	0.637031	1.29275	1.021	3233	3520	-	-3520	AK022173	1929	-10000	down	0.639	0	no	NA	1.36074	1.84743	0.441131
chr4	169804603	169805121	0.382219	1.80383	2.23859	1604	1863	+	1863	AK021652	1554	0.7	up	1	2.43	up	0.677	2.02917	2.75549	0.441418
chr3	12392534	12393026	0.541476	1.44306	1.41417	-55	191	+	191	PPARG	1705	2.81	up	2.17e-75	1.87	up	2.03e-11	0.668432	0.908058	0.442004
chr15	39156883	39157689	0.41407	2.28485	2.46415	6299	6702	+	6702	AK090546	2049	2.97	up	4.49e-22	1.37	up	0.0028	4.65515	6.32509	0.442259
chr8	134045392	134045924	0.350367	1.59338	2.18516	2073	2339	+	2339	SLA	4021	1.02	up	0.182	1.91	up	0.19	2.50662	3.41305	0.445317
chr15	59631350	59631968	0.0955546	1.38294	3.85527	9606	9915	-	-9915	AK130757	2207	0	no	NA	10000	up	1	1.24137	1.69087	0.445826
chr9	35511029	35511526	0.350367	2.1646	2.62716	3160	3408	-	-3408	ENSG00000235619	310	0	no	NA	0	no	NA	2.45887	3.35042	0.446344
chr3	57014918	57015229	0.254812	1.413	2.47126	3516	3671	-	-3671	ARHGEF3	669	-0.31	down	0.435	1.14	up	0.00299	2.41113	3.2878	0.447412
chr3	177196051	177196821	0.445922	2.58549	2.53558	36299	36684	-	-36684	LOC100505566/LOC100508527	542	10000	up	0.663	0.41	up	1	3.53314	4.8221	0.448711
chr8	8163141	8163879	0.41407	1.7437	2.07421	11379	11748	+	11748	SGK223	4627	-2.14	down	4.67e-165	-1.03	down	4.66e-36	1.76657	2.41105	0.448711
chr6	22880927	22881726	0.222961	2.826	3.6639	135228	135628	+	135628	ENSG00000233358	353	0	no	NA	0	no	NA	2.91245	3.97667	0.449325
chr5	71748019	71748910	0.445922	2.22472	2.31876	7584	8029	+	8029	ZNF366	499	0	no	NA	0	no	NA	6.32623	8.64221	0.450054
chr1	225843048	225843601	0.254812	3.39721	3.73685	2202	2479	-	-2479	ENAH	13109	0.24	up	0.000591	1.18	up	4.28e-108	2.26789	3.09992	0.450879
chr15	71160312	71160711	0.605179	1.35287	1.16059	11524	11723	-	-11723	LARP6	1930	-1.08	down	9.78e-98	-0.92	down	2.53e-30	1.67108	2.2858	0.451919
chr2	106103424	106104089	0.286664	1.95415	2.76911	47694	48026	-	-48026	FHL2	1485	0.2	up	0.00144	0.23	up	0.00816	4.41643	6.04328	0.452453
chr12	106517164	106517819	0.286664	1.80383	2.65363	14672	14999	+	14999	NUAK1	687	-0.72	down	0.000373	0.11	up	0.846	2.1724	2.97467	0.453439
chr2	204546695	204547026	0.191109	1.26268	2.72402	9548	9714	-	-9714	ENSG00000233031	249	0	no	NA	0	no	NA	3.67638	5.04129	0.455508
chr11	78589732	78590126	0.286664	1.59338	2.47466	10785	10982	+	10982	ODZ4	587	-1.04	down	0.0242	-0.66	down	0.273	0.525196	0.720184	0.455508
chr2	128266068	128266714	0.318515	2.19466	2.78456	2937	3260	-	-3260	IWS1	608	0.3	up	0.0811	0.14	up	0.735	1.55172	2.12924	0.456473
chr10	4705346	4705826	0.477773	2.04434	2.09724	735	975	-	-975	LOC338588	1016	0	no	NA	0	no	NA	4.60741	6.32509	0.457132
chr14	103533809	103534161	0.0955546	0.691469	2.85527	6348	6524	-	-6524	AK057714	3264	-0.49	down	0.644	-0.67	down	0.484	2.02917	2.7868	0.45772
chr2	40738737	40739151	0.605179	1.26268	1.06106	424	631	+	631	SLC8A1	3065	-2.88	down	2.06e-98	-0.03	down	0.839	2.02917	2.7868	0.45772
chr20	10575051	10575553	0.605179	1.77377	1.55138	3770	4021	+	4021	C20orf94	597	1.33	up	1	10000	up	0.752	2.53049	3.47567	0.457873
chr3	89195062	89195444	0.41407	0.871852	1.07421	18729	18920	-	-18920	EPHA3	2950	0.34	up	0.0356	-0.65	down	0.00096	0.501324	0.688872	0.458492
chr1	232278284	232278876	0.573328	1.413	1.30133	16961	17257	+	17257	ENSG00000235152	818	0	no	NA	0	no	NA	1.93368	2.66155	0.460919
chr3	189721342	189721911	0.382219	1.35287	1.82356	8110	8395	-	-8395	LEPREL1	1658	-0.25	down	0.00281	-0.09	down	0.488	2.36338	3.25648	0.462461
chr18	57260385	57260947	0.637031	2.22472	1.80419	103627	103908	+	103908	CCBE1	1221	-0.33	down	0.00205	0.49	up	1.34e-06	0.93103	1.28381	0.463528
chr20	10584724	10585701	0.286664	1.95415	2.76911	5400	5889	-	-5889	C20orf94	597	1.33	up	1	10000	up	0.752	3.19892	4.41504	0.46484
chr5	121518942	121519476	0.382219	1.413	1.88629	584	851	-	-851	ZNF474	441	10000	up	0.249	0	no	NA	3.62863	5.00997	0.465378
chr5	92918387	92919040	0.41407	1.20255	1.53815	2	329	+	329	NR2F1	3732	2.8	up	0	1.49	up	7.57e-87	3.60476	4.97866	0.465856
chr3	106147413	106147847	0.318515	1.47313	2.20945	102273	102490	-	-102490	ENSG00000244652	557	0	no	NA	0	no	NA	1.76657	2.44236	0.467327
chr8	109045865	109046363	0.350367	1.11236	1.66669	36383	36632	-	-36632	RSPO2	602	-0.39	down	1	10000	up	0.0437	1.76657	2.44236	0.467327
chr3	189578214	189578680	0.573328	1.17249	1.03214	3377	3610	+	3610	TP63	676	-0.94	down	0.444	-10000	down	0.119	0.859412	1.18987	0.46938
chr4	111208238	111208686	0.222961	0.992107	2.15371	4114	4338	+	4338	ENSG00000250304	1687	0	no	NA	0	no	NA	0.429706	0.594935	0.46938
chr6	149353767	149354561	0.222961	1.77377	2.99195	58	455	-	-455	ENSG00000236591	130	10000	up	0.663	-0.17	down	1	5.49069	7.6089	0.4707
chr1	14467266	14467684	0.286664	1.23262	2.10429	39403	39612	+	39612	OTTHUMG00000008026	1358	0	no	NA	0	no	NA	1.26525	1.75349	0.470812
chr4	83786741	83787058	0.222961	0.691469	1.63287	990	1149	-	-1149	SEC31A	857	0.12	up	0.181	0.32	up	0.000412	1.26525	1.75349	0.470812
chr19	47263053	47263737	0.350367	1.80383	2.36413	1221	1563	-	-1563	FKRP	3474	-0.3	down	0.000995	-0.04	down	0.83	1.26525	1.75349	0.470812
chr10	112095951	112096501	0.477773	1.56332	1.71022	31244	31519	-	-31519	SMNDC1	2029	0.3	up	0.00363	0.06	up	0.77	1.26525	1.75349	0.470812
chr10	17044011	17044756	0.700734	2.34498	1.74264	17818	18190	-	-18190	CUBN	599	-1.01	down	0.759	-10000	down	0.673	2.10079	2.91205	0.471105
chr10	71232324	71232726	0.573328	1.38294	1.2703	10855	11056	+	11056	TSPAN15	605	1.13	up	1.36e-08	0.59	up	0.133	4.1777	5.79278	0.471548
chr6	39823176	39823551	0.41407	1.32281	1.67566	472	659	+	659	DAAM2	692	0.3	up	0.209	0.73	up	0.000213	4.1777	5.79278	0.471548
chr11	122057194	122057751	0.286664	2.10447	2.87602	6086	6364	-	-6364	MIR100HG	147	-0.02	down	0.976	-0.31	down	0.547	3.34216	4.63423	0.471548
chr18	457026	458068	0.509625	3.42728	2.74956	22693	23214	+	23214	COLEC12	2205	-2.89	down	3.62e-55	-2.28	down	1.22e-100	2.05304	2.84942	0.472908
chrx	9346822	9347290	0.254812	1.05223	2.04595	999999999	999999999	?	1									0.405834	0.563622	0.47384
chr3	23410110	23410639	0.573328	1.35287	1.23859	20514	20778	+	20778	ENSG00000228171	249	0	no	NA	0	no	NA	0.405834	0.563622	0.47384
chr13	21653682	21654386	0.350367	1.77377	2.33988	14068	14420	+	14420	ENSG00000180172	400	1.23	up	1	10000	up	0.752	2.81696	3.91404	0.474519
chr3	30327351	30327988	0.286664	1.59338	2.47466	238248	238567	+	238567	ENSG00000227260	436	-10000	down	0.639	10000	up	1	3.60476	5.00997	0.474901
chr7	13959731	13960434	0.445922	2.67568	2.58504	8800	9152	-	-9152	ETV1	886	-0.18	down	0.583	-0.02	down	0.969	2.38726	3.31911	0.475442
chr9	117614526	117614826	0.127406	1.44306	3.50163	3661	3811	-	-3811	ENSG00000229817	2992	0.28	up	0.663	-0.17	down	0.984	3.93897	5.47966	0.476267
chr1	150583784	150584347	0.637031	1.413	1.14933	-96	185	-	-185	AK124918	1970	0.86	up	0.328	-0.96	down	0.312	1.95755	2.72417	0.476769
chr14	75038351	75039207	0.477773	2.34498	2.29518	13621	14049	+	14049	LTBP2	226	-0.09	down	0.432	-0.15	down	0.198	5.08486	7.07659	0.476847
chr1	92676500	92676998	0.159258	0.992107	2.63913	6499	6748	+	6748	C1orf146	830	0	no	NA	0	no	NA	1.16976	1.62824	0.477108
chr1	218550535	218551033	0.0955546	1.02217	3.41917	27478	27727	+	27727	TGFB2	395	1.37	up	3.81e-14	0	up	1	1.55172	2.16055	0.477534
chr4	108540201	108540647	0.350367	1.11236	1.66669	5145	5368	-	-5368	PAPSS1	2258	0.14	up	0.0838	0.14	up	0.238	4.60741	6.41903	0.478401
chr6	133872996	133873726	0.286664	2.76587	3.2703	15603	15968	+	15968	ENSG00000234554	681	0.26	up	1	-10000	down	0.221	1.14588	1.59693	0.478841
chr10	92689882	92691562	0.350367	3.21683	3.1987	8850	9690	-	-9690	ANKRD1	1974	1.83	up	5.05e-236	0.73	up	3.02e-40	4.53579	6.32509	0.479734
chr3	29805511	29805971	0.286664	1.23262	2.10429	1097	1327	-	-1327	RBMS3	483	0.01	up	0.971	-0.49	down	0.242	1.50397	2.09793	0.480187
chr2	62887803	62888372	0.477773	1.35287	1.50163	1390	1675	+	1675	ENSG00000226622	932	-1.23	down	0.759	-10000	down	0.673	2.98407	4.16454	0.480876
chr14	68407501	68408251	0.286664	1.83389	2.67748	32479	32854	-	-32854	RAD51L1	829	-0.15	down	0.966	-0.14	down	1	2.22015	3.09992	0.481576
chr3	72541345	72541901	0.159258	1.65351	3.3761	12056	12334	+	12334	ENSG00000244345	866	0	no	NA	0	no	NA	1.45623	2.0353	0.483008
chr2	223617841	223618376	0.382219	1.95415	2.35407	26288	26555	-	-26555	ENSG00000235225	378	1.28	up	0.829	10000	up	0.361	1.81432	2.5363	0.4833
chr5	172881676	172882644	0.350367	2.76587	2.9808	3508	3992	-	-3992	ENSG00000253968	539	0	no	NA	-0.61	down	1	4.34481	6.07459	0.483496
chr12	112560771	112561071	0.477773	0.871852	0.867757	2271	2421	+	2421	TRAFD1	1003	-0.19	down	0.234	-0.11	down	0.564	1.79044	2.50499	0.484487
chr11	101317097	101317538	0.318515	1.11236	1.80419	4668	4889	+	4889	TRPC6	1795	3.22	up	4.88e-16	2.73	up	6.53e-21	2.14853	3.00598	0.484487
chr15	48164906	48165547	0.41407	1.56332	1.91667	98486	98806	-	-98806	SEMA6D	5926	-2.83	down	3.89e-69	-0.39	down	0.0599	1.43235	2.00399	0.484487
chr15	60663344	60664023	0.254812	1.83389	2.8474	13002	13342	+	13342	ANXA2	3528	1.28	up	3.19e-132	0.68	up	4.87e-18	2.81696	3.94536	0.486015
chr16	70784960	70785376	0.286664	1.20255	2.06867	6419	6627	-	-6627	VAC14	892	-0.64	down	0.000299	-0.71	down	0.000113	4.20157	5.88672	0.486535
chr7	130606069	130606608	0.41407	1.65351	1.99759	96	366	+	366	LOC100506860	1191	1.31	up	0.0174	1.25	up	0.192	4.08221	5.73016	0.489225
chr20	34030693	34031143	0.41407	0.841788	1.02358	1497	1722	-	-1722	GDF5	2467	-1.64	down	1.75e-102	-1.98	down	2.14e-149	1.69495	2.37974	0.489558
chrx	39580814	39581261	0.445922	1.17249	1.39471	999999999	999999999	?	1									1.67108	2.34843	0.490913
chr12	125259142	125259544	0.222961	1.02217	2.19677	2630	2831	+	2831	SCARB1	2613	0.14	up	0.238	-0.06	down	0.75	2.0053	2.81811	0.490913
chr11	8714509	8715154	0.41407	1.71364	2.04912	-256	67	+	67	ST5	4506	0.26	up	0.0217	0.24	up	0.0245	3.00794	4.22717	0.490913
chr12	123272872	123273391	0.573328	1.14243	0.994669	7086	7345	-	-7345	CCDC62	2341	0.36	up	0.813	1.13	up	0.232	1.00265	1.40906	0.490913
chr7	121184717	121185204	0.222961	1.26268	2.50163	20208	20452	-	-20452	ENSG00000234985	675	-0.18	down	0.549	0.09	up	0.789	2.9602	4.16454	0.492464
chr5	127552473	127553351	0.509625	2.04434	2.00413	27093	27532	-	-27532	SLC12A2	6861	0.69	up	1.24e-13	0.3	up	0.0288	2.62598	3.69486	0.492661
chr2	135018101	135018844	0.350367	2.19466	2.64706	5886	6257	-	-6257	MGAT5	816	0.1	up	0.609	0.33	up	0.0176	4.15383	5.85541	0.495329
chr14	53477656	53478178	0.41407	1.68358	2.02358	25280	25541	+	25541	DDHD1	12898	-0.08	down	0.412	-0.33	down	0.00795	2.55436	3.60092	0.495401
chr2	38405848	38406276	0.668883	1.83389	1.45509	2721	2935	+	2935	C2orf58	1757	0.49	up	0.417	-0.61	down	0.569	3.77187	5.3231	0.496988
chr6	139919086	139919684	0.222961	1.413	2.6639	15891	16190	+	16190	ENSG00000219806	767	0.35	up	0.55	-0.04	down	1	3.07956	4.35242	0.499092
chr2	42369245	42369901	0.509625	2.04434	2.00413	477	805	+	805	ENSG00000224875	657	-10000	down	0.214	0.82	up	0.852	3.07956	4.35242	0.499092
chr10	91087949	91088301	0.477773	2.61555	2.45272	193	369	-	-369	IFIT3	1548	-2.1	down	6.08e-79	-1.86	down	3.54e-73	2.45887	3.47567	0.499293
chr16	4001839	4002332	0.350367	1.17249	1.74264	10318	10564	+	10564	ADCY9	7727	0.21	up	0.00599	0.12	up	0.321	2.14853	3.0373	0.499437
chr1	21476282	21476748	0.541476	3.33709	2.62362	11220	11453	+	11453	ENSG00000235112	297	0	no	NA	0	no	NA	1.83819	2.59892	0.499631
chr19	4130912	4131431	0.222961	1.0823	2.27924	6786	7046	-	-7046	MAP2K2	1734	0.43	up	9.73e-13	0.57	up	5.02e-18	2.74535	3.88273	0.500084
chr3	139020987	139021531	0.382219	1.77377	2.21435	20431	20703	-	-20703	MRPS22	556	-10000	down	0.639	0	no	NA	3.96285	5.60491	0.500154
chr2	238050046	238050726	0.445922	1.77377	1.99195	17306	17646	-	-17646	ENSG00000224844	669	0	no	NA	0	no	NA	5.18035	7.32709	0.500191
chr1	61547939	61548379	0.159258	1.20255	2.91667	-140	80	+	80	NFIA	1817	1.76	up	4.22e-24	2.07	up	4.89e-18	5.3952	7.64021	0.501936
chr3	16376300	16376814	0.509625	1.32281	1.3761	2008	2265	+	2265	OXNAD1	1232	1.01	up	4.16e-06	0.39	up	0.141	1.4801	2.09793	0.503271
chrx	68580976	68581564	0.318515	1.0823	1.76466	999999999	999999999	?	1									1.7427	2.47368	0.505334
chr12	109882851	109883533	0.41407	2.28485	2.46415	1362	1703	-	-1703	MYO1H	2877	1.33	up	1	10000	up	1	2.31564	3.2878	0.50571
chr3	73776266	73776826	0.573328	1.7437	1.60472	78308	78588	-	-78588	ENSG00000242364	409	-0.58	down	0.00583	-0.22	down	0.494	2.88858	4.10192	0.505937
chr16	48109243	48109764	0.254812	1.53326	2.58909	7120	7380	+	7380	ABCC12	5168	0	no	NA	10000	up	0.752	2.86471	4.0706	0.506855
chr9	117612851	117613531	0.286664	1.50319	2.3906	1986	2326	-	-2326	ENSG00000229817	2992	0.28	up	0.663	-0.17	down	0.984	3.43765	4.88473	0.506855
chr15	90379771	90380219	0.541476	1.20255	1.15113	1024	1248	-	-1248	AP3S2	642	0.17	up	0.337	0.09	up	0.78	5.15647	7.32709	0.506855
chr2	19849474	19850049	0.41407	1.59338	1.94415	61426	61714	+	61714	ENSG00000235911	443	0	no	NA	0	no	NA	1.98142	2.81811	0.508191
chr20	52259043	52260099	0.191109	1.86396	3.2859	7914	8442	-	-8442	ENSG00000235415	381	-10000	down	0.639	0	no	NA	1.69495	2.41105	0.508417
chr8	23396520	23396826	0.605179	1.47313	1.28345	2157	2310	+	2310	SLC25A37	3651	-0.17	down	0.0425	-0.41	down	3.77e-05	2.24402	3.19386	0.509214
chr5	53942290	53942865	0.350367	1.56332	2.15767	474	762	-	-762	AK095157	2431	-1.44	down	0.759	-0.58	down	0.909	3.07956	4.38373	0.509433
chr4	169555412	169556022	0.382219	1.95415	2.35407	2606	2911	-	-2911	PALLD	2920	0.6	up	5.55e-33	1	up	5.19e-48	3.62863	5.16654	0.509772
chr10	60384622	60385451	0.127406	3.60766	4.82356	4012	4427	-	-4427	BICC1	813	0.57	up	0.266	0.5	up	0.673	1.67108	2.37974	0.510022
chr15	88162234	88162867	0.159258	1.59338	3.32266	39316	39633	-	-39633	NCRNA00052	1786	0	no	NA	0	no	NA	2.19628	3.13123	0.511672
chr11	117091602	117092168	0.159258	1.86396	3.54893	748	1031	-	-1031	PCSK7	2346	0.76	up	1.53e-29	0.75	up	6.03e-16	4.89388	6.98265	0.512798
chr3	15839346	15839859	0.191109	1.29275	2.75797	-168	89	+	89	ANKRD28	3516	0.82	up	3.9e-27	0.21	up	0.12	2.98407	4.25848	0.513056
chr6	32054422	32054828	0.318515	0.962043	1.59474	527	730	-	-730	ATF6B	1902	1.25	up	2.18e-35	-0.18	down	0.441	3.24667	4.63423	0.513368
chr10	29947938	29948401	0.350367	2.28485	2.70516	1140	1371	-	-1371	SVIL	287	-0.25	down	0.72	0.52	up	0.64	2.435	3.47567	0.513368
chr9	4302044	4302552	0.350367	1.68358	2.26459	1952	2206	-	-2206	LOC100287493	673	1.09	up	0.0575	0.54	up	0.466	2.14853	3.06861	0.514234
chr2	102577426	102578867	0.318515	4.68996	3.88014	-348	372	+	372	LOC151438/LOC100506328	3727	2.2	up	0.567	-10000	down	0.673	2.93633	4.19585	0.514952
chr5	67342975	67343278	0.159258	1.35287	3.08659	39770	39921	+	39921	ENSG00000253801	276	1.13	up	0.00211	0.38	up	0.496	1.59946	2.2858	0.515113
chr10	125607090	125607774	0.318515	2.13453	2.74449	14355	14697	+	14697	CPXM2	448	-0.98	down	0.0809	-0.77	down	0.168	0.787795	1.12724	0.516909
chr6	72188521	72189076	0.541476	1.65351	1.61056	19944	20221	-	-20221	ENSG00000223765	454	0	no	NA	0	no	NA	3.62863	5.19785	0.51849
chr12	113683901	113684426	0.509625	1.32281	1.3761	1646	1908	-	-1908	TPCN1	2348	0.25	up	0.05	0.59	up	5.65e-07	1.55172	2.22318	0.518757
chr15	99439945	99440516	0.477773	1.71364	1.84267	11418	11704	+	11704	IGF1R	3101	0.91	up	1.17e-55	0.89	up	4.9e-45	2.57824	3.69486	0.519133
chr5	146796565	146797368	0.41407	1.80383	2.12312	678	1080	+	1080	DPYSL3	539	-1.69	down	9.62e-86	-0.62	down	1.32e-07	2.02917	2.91205	0.521146
chr16	48110340	48110820	0.286664	1.38294	2.2703	6064	6304	+	6304	ABCC12	5168	0	no	NA	10000	up	0.752	2.76922	3.97667	0.522081
chr19	11275474	11275963	0.0318515	0.992107	4.96106	304	548	+	548	KANK2	3863	0.52	up	5.14e-27	0.2	up	0.0508	3.74799	5.38572	0.523022
chr12	56241599	56242051	0.605179	1.23262	1.02629	4842	5068	-	-5068	MMP19	1604	1.16	up	7.09e-66	1.06	up	2.66e-45	2.74535	3.94536	0.523168
chr1	8577427	8578022	0.700734	1.26268	0.849552	7976	8274	+	8274	RERE	6733	0.55	up	5.13e-22	0.42	up	1.05e-07	1.4801	2.12924	0.524644
chr10	29925125	29925622	0.382219	1.26268	1.72402	1224	1473	-	-1473	SVIL	7586	-0.95	down	2.48e-38	-0.44	down	1.07e-06	2.45887	3.53829	0.525056
chr2	177864069	177864501	0.350367	1.20255	1.77916	8499	8715	-	-8715	ENSG00000236501	567	0	no	NA	0	no	NA	1.45623	2.09793	0.52673
chr2	100279076	100279901	0.191109	2.70575	3.82356	17608	18020	-	-18020	AK022173	1929	-10000	down	0.639	0	no	NA	1.69495	2.44236	0.527033
chr5	88753651	88754176	0.477773	1.56332	1.71022	7622	7885	+	7885	ENSG00000248309	501	-10000	down	0.215	0	no	NA	2.1724	3.13123	0.527439
chr3	12234836	12235349	0.159258	1.17249	2.88014	1304	1560	-	-1560	SYN2	3317	3.87	up	7.23e-05	2.05	up	0.371	2.64986	3.82011	0.527699
chr9	98556435	98556989	0.382219	1.53326	2.00413	11381	11658	+	11658	C9orf130	8014	0.65	up	0.151	-0.42	down	0.664	1.19363	1.72218	0.528881
chr9	127594938	127595437	0.127406	0.901915	2.82356	17774	18024	-	-18024	OLFML2A	5964	4.51	up	0	2.6	up	2.48e-131	1.67108	2.41105	0.528881
chr5	133802008	133802476	0.191109	1.23262	2.68926	5702	5936	-	-5936	ENSG00000250564	669	-0.42	down	1	0	no	NA	5.25196	7.57759	0.528881
chr6	113331265	113331831	0.509625	1.29275	1.34293	308	591	+	591	ENSG00000218490	479	0	no	NA	0	no	NA	3.10343	4.47767	0.528881
chr9	16985896	16986407	0.445922	1.56332	1.80975	62510	62765	+	62765	ENSG00000237153	666	0	no	NA	-0.61	down	1	3.81961	5.51097	0.528881
chr7	46803655	46804202	0.509625	1.44306	1.50163	4206	4479	-	-4479	LOC730338	844	0	no	NA	0	no	NA	3.79574	5.47966	0.529706
chr11	7600610	7601056	0.445922	1.44306	1.69427	1832	2055	-	-2055	PPFIBP2	2399	0.5	up	0.000212	0.43	up	0.0152	2.98407	4.3211	0.534118
chr7	112635101	112635882	0.350367	1.413	2.01182	-194	197	+	197	ENSG00000234520	687	0.15	up	1	0.1	up	0.984	3.43765	4.97866	0.534336
chr2	198060476	198060776	0.445922	1.20255	1.43124	1939	2089	+	2089	ENSG00000231621	455	0	no	NA	0	no	NA	1.81432	2.63024	0.535768
chr3	188311865	188312346	0.254812	1.02217	2.00413	9730	9971	-	-9971	LPP	582	0.46	up	0.0976	0.31	up	0.324	2.6976	3.91404	0.536983
chr3	187672589	187673451	0.605179	2.07441	1.77726	3112	3543	+	3543	LOC100505844	428	0	no	NA	0	no	NA	2.24402	3.25648	0.537229
chr2	210338404	210339050	0.350367	2.40511	2.77916	49622	49945	-	-49945	MAP2	2241	2.14	up	8.78e-10	2.21	up	3.32e-07	0.668432	0.970683	0.538219
chr4	186659038	186659701	0.286664	1.65351	2.5281	1782	2114	+	2114	SORBS2	571	2.87	up	1.8e-32	0.95	up	0.0199	2.88858	4.19585	0.538604
chr17	66374563	66375251	0.445922	1.77377	1.99195	21046	21390	+	21390	ARSG	979	-0.22	down	0.615	-0.33	down	0.561	4.20157	6.10591	0.539276
chr3	124531445	124532001	0.286664	1.92409	2.74674	3200	3478	-	-3478	ITGB5	475	0.42	up	9.66e-13	0.23	up	0.00881	3.93897	5.73016	0.540755
chr9	16986841	16987396	0.573328	1.80383	1.65363	61522	61799	+	61799	ENSG00000237153	666	0	no	NA	-0.61	down	1	3.93897	5.73016	0.540755
chr9	134552436	134553001	0.382219	1.86396	2.2859	21810	22093	+	22093	RAPGEF1	1883	0	no	NA	0	no	NA	3.46152	5.04129	0.542386
chr2	236147081	236147551	0.382219	1.0823	1.50163	59532	59767	-	-59767	ENSG00000235293	663	10000	up	1	0	no	NA	0.859412	1.25249	0.543381
chr1	8456826	8457555	0.637031	2.1646	1.76466	25160	25525	+	25525	ENSG00000232912	1047	0.46	up	0.476	0.76	up	0.139	3.2228	4.69685	0.543381
chr21	27268091	27268391	0.222961	1.413	2.6639	1904	2054	+	2054	APP	816	-0.86	down	1.03e-37	-0.41	down	9.58e-08	0.214853	0.313123	0.543381
chr15	90944018	90944535	0.732586	1.77377	1.27575	12462	12720	-	-12720	IQGAP1	2832	-0.16	down	0.0209	0.24	up	0.0107	2.55436	3.72617	0.544728
chr6	113340094	113340501	0.605179	1.32281	1.12817	7478	7681	-	-7681	ENSG00000218490	479	0	no	NA	0	no	NA	3.36603	4.91604	0.546447
chr21	35899114	35899544	0.445922	1.7437	1.96729	-147	68	-	-68	RCAN1	2408	-1.53	down	8.16e-272	-0.06	down	0.655	3.34216	4.88473	0.547497
chr10	30184480	30184780	0.191109	1.32281	2.79114	4084	4234	-	-4234	ENSG00000237936	436	-10000	down	0.38	0	no	NA	1.45623	2.12924	0.548103
chr8	123208125	123208741	0.318515	1.38294	2.1183	68702	69010	-	-69010	ENSG00000254303	792	-10000	down	0.01	0.12	up	0.951	2.07691	3.0373	0.548347
chr10	59917100	59917734	0.41407	2.31492	2.48301	33544	33861	+	33861	IPMK	6133	0.03	up	1	-0.77	down	2.03e-07	0.620687	0.908058	0.548919
chr3	39952921	39953301	0.477773	1.38294	1.53334	100943	101133	-	-101133	MYRIP	961	10000	up	1.41e-05	-2.2	down	0.586	1.86206	2.72417	0.548919
chr17	67729753	67730201	0.668883	1.59338	1.25227	105261	105485	-	-105485	ENSG00000227517	3085	0	no	NA	0	no	NA	2.48275	3.63223	0.548919
chr13	77961291	77961926	0.541476	1.71364	1.66209	60106	60423	-	-60423	MYCBP2	649	0.74	up	0.0384	0.25	up	0.838	3.10343	4.54029	0.548919
chrx	38093203	38093908	0.286664	1.23262	2.10429	999999999	999999999	?	1									1.24137	1.81612	0.548919
chr13	44806128	44806428	0.382219	1.29275	1.75797	67	217	-	-217	ENSG00000230731	323	0	no	NA	0	no	NA	1.64721	2.41105	0.54964
chr6	158136688	158137127	0.318515	1.11236	1.80419	-50	170	+	170	SNX9	3652	-0.3	down	8.92e-06	-0.32	down	0.000145	2.84084	4.16454	0.551842
chr10	111834787	111835470	0.159258	1.59338	3.32266	1294	1635	+	1635	ADD3	683	-1.19	down	2.06e-132	-0.27	down	0.00668	2.435	3.56961	0.551842
chr2	161232432	161233063	0.286664	1.38294	2.2703	7828	8144	-	-8144	RBMS1	1674	0.29	up	0.0077	0.5	up	2.41e-06	1.62333	2.37974	0.551842
chr6	18161726	18162037	0.637031	0.901915	0.501629	1600	1755	-	-1755	KDM1B	3552	0.66	up	6.27e-17	0.9	up	2.88e-28	1.40848	2.06661	0.553129
chr10	31323287	31323938	0.318515	1.29275	2.021	2420	2746	-	-2746	ZNF438	3249	0.5	up	0.00239	0.27	up	0.0987	2.81696	4.13323	0.553129
chr8	57451532	57452124	0.41407	1.59338	1.94415	869	1165	+	1165	ENSG00000253139	499	-0.3	down	1	10000	up	1	3.60476	5.29179	0.553852
chr2	158030118	158030652	0.445922	1.59338	1.83723	36366	36633	+	36633	ENSG00000213194	970	0.03	up	1	0.22	up	0.506	2.60211	3.82011	0.553931
chr2	237478151	237478559	0.41407	1.20255	1.53815	-179	25	+	25	CXCR7	2103	-0.43	down	1.31e-05	-1.13	down	5.69e-28	2.19628	3.22517	0.554316
chr7	93977449	93977927	0.41407	1.32281	1.67566	45946	46185	+	46185	COL1A2	5411	0.03	up	0.837	0.14	up	0.715	4.96549	7.29578	0.555124
chr15	59605847	59606335	0.445922	1.02217	1.19677	6157	6401	-	-6401	AK022392	3491	-10000	down	0.639	0	no	NA	2.9602	4.35242	0.556122
chr7	42006644	42007117	0.318515	1.29275	2.021	692	928	-	-928	GLI3	2877	0.26	up	0.0859	-0.02	down	0.955	1.57559	2.31711	0.556437
chr7	110838186	110838714	0.445922	1.35287	1.60116	46591	46855	+	46855	ENSG00000237305	1229	0	no	NA	0	no	NA	2.14853	3.16255	0.557736
chr4	77908299	77909004	0.318515	1.95415	2.61711	-64	289	+	289	2011-09-01	579	0.08	up	0.445	0.74	up	1.39e-32	3.67638	5.41704	0.559219
chr2	205333696	205334126	0.477773	1.32281	1.46921	673	888	+	888	ENSG00000236634	588	0	no	NA	0	no	NA	2.12466	3.13123	0.5595
chr22	24684922	24685543	0.127406	1.35287	3.40852	788	1099	+	1099	ENSG00000215464	512	-10000	down	0.381	10000	up	1	2.50662	3.69486	0.559775
chr20	50648364	50648949	0.509625	1.38294	1.44023	19254	19546	+	19546	ZFP64	1841	-0.36	down	0.0316	-0.28	down	0.114	2.48275	3.66354	0.561303
chr3	87031995	87032382	0.191109	1.02217	2.41917	7470	7664	+	7664	VGLL3	624	-0.02	down	0.759	1.08	up	6.55e-32	2.67373	3.94536	0.561303
chr9	89885285	89885829	0.509625	1.80383	1.82356	110644	110916	-	-110916	C9orf170	3409	1.94	up	0.00169	0.17	up	1	5.51456	8.14121	0.561996
chr21	46469982	46471001	0.41407	2.52536	2.60854	19868	20378	+	20378	C21orf122	2257	1.04	up	3.27e-06	1.02	up	4.58e-05	5.29971	7.82809	0.562746
chr9	129948233	129949056	0.318515	2.04434	2.6822	1618	2029	-	-2029	RALGPS1	1672	0.34	up	0.464	0.94	up	0.396	4.67902	6.92003	0.56457
chr3	106064123	106064902	0.382219	1.71364	2.16459	18982	19372	-	-19372	ENSG00000244652	557	0	no	NA	0	no	NA	2.24402	3.31911	0.564709
chr9	89409647	89410118	0.41407	1.38294	1.73979	98236	98471	-	-98471	ENSG00000232211	530	0	no	NA	0	no	NA	2.98407	4.41504	0.565145
chr4	148024449	148025146	0.191109	2.10447	3.46099	75244	75593	-	-75593	FLJ10283	2133	0	no	NA	0	no	NA	1.86206	2.75549	0.565407
chr9	16642597	16643021	0.222961	1.11236	2.31876	16209	16421	-	-16421	ENSG00000230694	455	0	no	NA	0	no	NA	0.93103	1.37774	0.565407
chr1	59527427	59527876	0.573328	1.38294	1.2703	5112	5337	-	-5337	ENSG00000237352	625	0	no	NA	0	no	NA	1.4801	2.19186	0.566464
chr7	127855208	127855951	0.541476	2.40511	2.15113	25380	25751	+	25751	LEP	3427	5.86	up	0	3.22	up	1.05e-176	3.70025	5.47966	0.566464
chr5	95194625	95195180	0.159258	2.826	4.14933	-100	178	-	-178	C5orf27	804	10000	up	0.416	0.35	up	1	3.70025	5.47966	0.566464
chr3	112529979	112530887	0.732586	3.18677	2.12102	-308	146	+	146	CD200R1L	794	0	no	NA	0	no	NA	3.67638	5.44835	0.567535
chr1	204265605	204266030	0.605179	1.35287	1.16059	8322	8535	-	-8535	PLEKHA6	7007	5.08	up	0	2.4	up	1.19e-29	2.93633	4.35242	0.567804
chr10	19927395	19927876	0.41407	1.83389	2.14696	53362	53603	+	53603	C10orf112	414	0	no	NA	0	no	NA	2.55436	3.78879	0.568774
chr3	41722935	41723401	0.41407	1.413	1.77082	72497	72730	+	72730	ULK4	1874	0.37	up	0.186	-0.34	down	0.725	2.36338	3.50698	0.569376
chr7	114648495	114649001	0.382219	1.71364	2.16459	6818	7071	+	7071	MDFIC	584	0.34	up	0.00144	0.24	up	0.12	1.62333	2.41105	0.570701
chr11	129013085	129013669	0.286664	1.14243	1.99467	7870	8162	-	-8162	ARHGAP32	2723	-0.4	down	0.086	-0.35	down	0.161	2.31564	3.44436	0.572825
chr12	13251403	13251990	0.477773	2.1646	2.1797	2662	2956	-	-2956	GSG1	1628	0.42	up	0.714	-0.65	down	0.792	4.24932	6.32509	0.573856
chr6	57178453	57178976	0.41407	1.92409	2.21623	628	889	+	889	PRIM2	902	-0.24	down	0.192	0.61	up	0.00143	3.89123	5.79278	0.574031
chr10	104534805	104535374	0.350367	1.32281	1.91667	514	798	+	798	C10orf26	4222	1.54	up	2.17e-159	0.75	up	1.21e-28	3.89123	5.79278	0.574031
chr18	74452307	74452737	0.159258	0.901915	2.50163	46715	46930	-	-46930	FLJ44881	2337	0	no	NA	0	no	NA	0.883285	1.31512	0.574242
chr17	57915132	57915476	0.41407	2.28485	2.46415	-160	12	-	-12	VMP1	1036	-0.16	down	0.173	-0.56	down	1.07e-07	3.70025	5.51097	0.574685
chr11	70998017	70998720	0.191109	2.79594	3.87086	146	498	+	498	LOC100133306	3658	0	no	NA	0	no	NA	1.40848	2.09793	0.574824
chr1	240163970	240164380	0.222961	1.14243	2.35724	6444	6649	+	6649	RPS7P5	953	0	no	NA	10000	up	1	0.525196	0.782809	0.575802
chr18	41472769	41473276	0.350367	1.47313	2.07194	392968	393221	-	-393221	AK131011	664	0	no	NA	0	no	NA	0.525196	0.782809	0.575802
chr3	157029294	157029821	0.191109	1.23262	2.68926	1692	1956	+	1956	VEPH1	1986	-0.38	down	0.213	-0.42	down	0.129	3.29441	4.91604	0.577474
chr4	15402226	15403113	0.509625	2.4953	2.29171	9208	9652	+	9652	AK130568	1502	0	no	NA	-1.15	down	1	4.65515	6.95134	0.578463
chr6	2157826	2158369	0.573328	1.20255	1.06867	17856	18127	+	18127	GMDS	1440	-0.21	down	0.111	0.08	up	0.564	2.05304	3.06861	0.579823
chr3	32511160	32511645	0.286664	1.53326	2.41917	4368	4610	+	4610	AK000998	1350	0.39	up	1	0	no	NA	1.52784	2.2858	0.581202
chr1	172320616	172321474	0.637031	2.07441	1.70326	17394	17823	+	17823	PIGC	926	0.72	up	0.581	2.71	up	0.107	1.69495	2.5363	0.581481
chr12	104917237	104917741	0.445922	1.44306	1.69427	54504	54756	-	-54756	AK127265	2879	-10000	down	0.639	-10000	down	0.673	2.02917	3.0373	0.5819
chr12	66273557	66274096	0.382219	1.32281	1.79114	1726	1995	+	1995	LOC100129940	4675	0.79	up	2.08e-05	0.05	up	1	2.36338	3.53829	0.5822
chr15	50147873	50148653	0.477773	2.1646	2.1797	1782	2172	+	2172	ATP8B4	5784	0.67	up	0.13	1.33	up	0.0461	3.19892	4.79079	0.582676
chr12	110546871	110547488	0.382219	1.68358	2.13906	14652	14960	+	14960	IFT81	2730	-0.53	down	4.04e-06	-0.21	down	0.232	3.00794	4.50898	0.584023
chr17	14641444	14642051	0.382219	2.25479	2.56052	8442	8745	-	-8745	ENSG00000226130	232	0	no	NA	0	no	NA	3.50927	5.26047	0.584023
chr12	12551173	12551716	0.191109	1.47313	2.94641	36846	37117	+	37117	LOH12CR1	390	-0.79	down	0.00303	0.29	up	0.514	1.67108	2.50499	0.584023
chr4	86395840	86396542	0.191109	2.37504	3.63548	-258	93	+	93	ARHGAP24	4644	0.54	up	6.65e-11	0.87	up	4.19e-29	1.98142	2.97467	0.586194
chr9	33320326	33320914	0.127406	1.20255	3.23859	1307	1601	-	-1601	NFX1	391	0.34	up	0.406	-0.34	down	0.409	3.29441	4.94735	0.586634
chr4	109968043	109968501	0.637031	1.35287	1.08659	2838	3067	+	3067	COL25A1	1711	-1.73	down	0.312	-2.36	down	0.0267	1.31299	1.97268	0.587298
chr17	66576382	66576751	0.350367	1.44306	2.0422	19986	20171	+	20171	FAM20A	1805	-1.02	down	5.62e-46	-1.3	down	6.6e-28	3.60476	5.41704	0.587601
chr2	37700110	37700638	0.668883	1.38294	1.04791	99645	99909	-	-99909	QPCT	1703	-0.81	down	2.08e-23	-0.04	down	0.848	2.12466	3.19386	0.58807
chr6	48103472	48103851	0.637031	1.17249	0.88014	13088	13277	+	13277	ENSG00000226068	803	10000	up	1	1.07	up	0.852	2.10079	3.16255	0.590158
chr9	107969128	107969539	0.445922	1.32281	1.56874	20090	20296	-	-20296	ENSG00000238208	3760	0	no	NA	0	no	NA	3.2228	4.85341	0.590687
chr21	30631300	30631798	0.254812	1.38294	2.44023	24730	24979	+	24979	NCRNA00189	308	0	no	NA	-10000	down	0.673	2.24402	3.38173	0.591676
chr4	108817100	108817717	0.350367	1.77377	2.33988	256	565	-	-565	SGMS2	581	0.54	up	0.000777	0.18	up	0.573	2.55436	3.85142	0.592425
chr4	114276876	114277201	0.382219	1.05223	1.46099	1054	1217	-	-1217	ANK2	4214	-0.89	down	7.76e-12	-0.96	down	9.51e-09	3.48539	5.26047	0.593871
chr6	16339099	16339598	0.382219	1.35287	1.82356	10524	10774	-	-10774	ATXN1	2507	-1.44	down	1.49e-36	-0.48	down	0.000291	1.26525	1.91005	0.594195
chr2	28619218	28620019	0.318515	3.09658	3.28124	638	1039	-	-1039	FOSL2	983	-0.7	down	2.21e-25	-0.25	down	0.0108	4.34481	6.57559	0.597829
chr1	110416123	110416914	0.509625	2.64562	2.3761	2064	2460	-	-2460	ENSG00000228420	476	0	no	NA	10000	up	1	3.24667	4.91604	0.598536
chr5	172202498	172203024	0.222961	1.26268	2.50163	1753	2016	+	2016	ENSG00000253736	352	-0.09	down	1	-10000	down	0.4	4.46417	6.76347	0.599371
chr9	96901950	96902559	0.382219	1.26268	1.72402	27410	27715	-	-27715	AK098034	1640	0.71	up	0.885	-1.45	down	0.511	3.67638	5.5736	0.600325
chr3	157000227	157000926	0.41407	3.00638	2.86008	2154	2504	+	2504	ENSG00000243176	567	1.61	up	0.248	2.94	up	0.138	2.29177	3.47567	0.600831
chr12	58923590	58924143	0.0955546	1.65351	4.11306	13764	14041	+	14041	LOC100506869	1450	0	no	NA	10000	up	0.36	1.98142	3.00598	0.601301
chr1	64434391	64434930	0.445922	1.47313	1.72402	79716	79985	+	79985	ROR1	2711	-1.01	down	9.96e-38	0.52	up	9.79e-10	1.2175	1.84743	0.601595
chr3	74581551	74582030	0.350367	1.29275	1.8835	11208	11447	-	-11447	CNTN3	4997	1.82	up	3.78e-120	0.86	up	3.87e-14	3.46152	5.26047	0.603786
chr11	111194831	111195460	0.318515	1.413	2.14933	15350	15665	+	15665	AK124048	2297	0	no	NA	0	no	NA	1.05039	1.59693	0.604371
chr16	53698726	53699468	0.286664	2.826	3.30133	12137	12508	-	-12508	RPGRIP1L	2427	-0.05	down	0.814	-0.04	down	1	3.27054	4.97866	0.606229
chr1	234669618	234670247	0.445922	1.71364	1.9422	-2	313	-	-313	AK095015	2852	0	no	NA	-10000	down	0.673	2.50662	3.82011	0.60787
chr2	216545733	216546226	0.286664	1.65351	2.5281	2986	3233	-	-3233	ENSG00000237525	508	-10000	down	0.639	0.82	up	1	3.53314	5.38572	0.608189
chr20	45582807	45583578	0.350367	3.1567	3.17148	23296	23682	+	23682	EYA2	2738	0.46	up	4.21e-12	0.35	up	2.78e-05	2.79309	4.25848	0.608476
chr10	31551495	31552254	0.382219	3.09658	3.0182	656	1035	-	-1035	AK125507	2246	0	no	NA	10000	up	1	2.79309	4.25848	0.608476
chr1	225883584	225883940	0.350367	1.29275	1.8835	4366	4544	+	4544	ENSG00000227496	1530	2.16	up	2.26e-51	2.05	up	1.1e-48	1.90981	2.91205	0.608608
chr1	56055416	56056101	0.382219	1.92409	2.3317	8706	9048	-	-9048	ENSG00000234810	4063	1.53	up	0.00553	0.71	up	0.453	4.87	7.45234	0.61377
chr3	81793451	81794004	0.318515	1.53326	2.26716	672	948	-	-948	GBE1	2517	0.34	up	3.34e-07	-0.24	down	0.0118	2.6976	4.13323	0.615593
chr15	75912401	75913483	0.191109	2.01428	3.39779	-84	457	+	457	SNUPN	1365	-0.25	down	0.0247	-0.2	down	0.172	2.41113	3.69486	0.615809
chr2	204608015	204608807	0.509625	2.34498	2.20207	5458	5854	-	-5854	CD28	3555	3.71	up	0.0282	-0.51	down	1	2.26789	3.47567	0.615938
chr7	134617431	134617965	0.41407	2.01428	2.28232	-91	176	+	176	CALD1	527	-0.94	down	1.79e-87	0.15	up	0.123	3.81961	5.85541	0.616344
chr22	35772751	35773125	0.382219	0.841788	1.13906	3229	3416	+	3416	HMOX1	922	-2.96	down	0	-0.63	down	2.26e-18	2.81696	4.3211	0.617259
chr9	89410757	89411251	0.286664	1.53326	2.41917	99346	99593	-	-99593	ENSG00000232211	530	0	no	NA	0	no	NA	3.19892	4.91604	0.619909
chr2	174049086	174049543	0.382219	1.29275	1.75797	2808	3037	+	3037	ZAK	661	-0.2	down	0.221	-0.01	down	0.836	1.79044	2.75549	0.621991
chr13	106803620	106804028	0.477773	2.10447	2.13906	224883	225087	+	225087	LOC728192	631	1.39	up	0.776	0.13	up	1	3.58089	5.51097	0.621991
chr16	54681432	54682076	0.191109	2.1646	3.50163	9172	9494	+	9494	ENSG00000234908	269	0	no	NA	0	no	NA	1.50397	2.31711	0.623551
chr4	57723923	57724530	0.382219	1.26268	1.72402	36014	36318	-	-36318	SPINK2	763	0	no	NA	0	no	NA	0.954903	1.47168	0.624038
chr20	34357075	34357455	0.286664	0.751596	1.3906	2441	2631	+	2631	PHF20	919	0.56	up	5.36e-05	0.29	up	0.0637	1.76657	2.72417	0.624868
chr8	123179041	123179579	0.159258	1.20255	2.91667	39618	39887	-	-39887	ENSG00000254303	792	-10000	down	0.01	0.12	up	0.951	2.14853	3.31911	0.627445
chr4	124706603	124707084	0.605179	1.23262	1.02629	11184	11425	-	-11425	LOC285419	2206	-10000	down	0.38	-0.11	down	1	1.98142	3.06861	0.631048
chr5	67342197	67342706	0.0955546	1.59338	4.05962	40340	40595	+	40595	ENSG00000253801	276	1.13	up	0.00211	0.38	up	0.496	1.98142	3.06861	0.631048
chr3	10018635	10019073	0.286664	1.14243	1.99467	908	1127	+	1127	TMEM111	564	0.27	up	0.0153	0.26	up	0.0507	2.24402	3.47567	0.631205
chr3	72987786	72988086	0.700734	1.47313	1.07194	9042	9192	-	-9192	FTHL23	550	0.32	up	0.778	0.47	up	0.463	0.787795	1.22118	0.632386
chr14	85937998	85938518	0.318515	1.62345	2.34963	51582	51842	-	-51842	AK131026	544	0	no	NA	0	no	NA	1.05039	1.62824	0.632386
chr14	95131388	95131920	0.318515	1.53326	2.26716	18057	18323	-	-18323	SERPINA13	1718	0	no	NA	0	no	NA	1.81432	2.81811	0.635303
chr2	187286951	187287404	0.350367	1.11236	1.66669	57096	57323	-	-57323	ENSG00000227692	531	-1.44	down	0.759	10000	up	1	0.644559	1.00199	0.63649
chr6	53493464	53493956	0.541476	1.77377	1.71185	286	532	-	-532	ENSG00000235899	566	3.07	up	6.06e-05	1.01	up	0.673	1.93368	3.00598	0.63649
chr17	71336354	71336709	0.445922	0.721532	0.694274	1628	1806	-	-1806	SDK2	6406	-10000	down	0.639	-1.07	down	1	1.67108	2.59892	0.637134
chr1	40400046	40400401	0.41407	1.413	1.77082	20382	20560	+	20560	MFSD2A	2201	0.56	up	0.00146	0.6	up	0.00541	1.79044	2.7868	0.638292
chr17	4107886	4108351	0.286664	1.44306	2.3317	10130	10362	-	-10362	ANKFY1	1927	0.05	up	0.936	0.1	up	0.684	1.52784	2.37974	0.639305
chr15	58732416	58732726	0.222961	1.0823	2.27924	5311	5466	-	-5466	AK091917	2215	-0.71	down	1	10000	up	0.752	4.03446	6.29378	0.64155
chr9	16627788	16628543	0.509625	5.71213	3.48652	1400	1778	-	-1778	ENSG00000230694	455	0	no	NA	0	no	NA	2.0053	3.13123	0.642916
chr15	60694488	60695088	0.286664	1.59338	2.47466	1574	1874	+	1874	ENSG00000242667	498	0.25	up	1	0.44	up	0.852	2.12466	3.31911	0.643565
chr20	9389844	9390367	0.222961	1.83389	3.04005	15592	15853	-	-15853	PLCB4	2247	-0.52	down	0.000391	0.01	up	0.933	1.86206	2.91205	0.645134
chr10	33482852	33483447	0.445922	2.52536	2.50163	-148	150	+	150	NRP1	574	-1.42	down	2.78e-15	-0.2	down	0.517	2.22015	3.47567	0.646635
chr12	46956545	46957001	0.318515	1.23262	1.95229	25260	25488	-	-25488	LOC100288798	457	1.41	up	0.00263	2	up	0.00208	2.22015	3.47567	0.646635
chr11	26968816	26969628	0.286664	3.36715	3.5541	46000	46406	+	46406	FIBIN	3003	1.08	up	5.6e-78	-0.36	down	0.00159	2.57824	4.03929	0.647717
chr17	59329472	59329961	0.41407	1.35287	1.70808	125230	125475	+	125475	BCAS3	2743	0.24	up	0.969	1.17	up	0.397	2.07691	3.25648	0.648874
chr13	40976931	40977401	0.286664	1.59338	2.47466	47670	47905	+	47905	LOC646982	1892	10000	up	0.00999	10000	up	0.235	2.435	3.82011	0.64969
chr6	45709435	45710006	0.509625	1.65351	1.69803	138744	139030	+	139030	CLIC5	698	10000	up	0.663	0	no	NA	1.2175	1.91005	0.64969
chr1	8940101	8940659	0.286664	1.35287	2.23859	157	436	-	-436	LOC100505975	447	0.22	up	0.955	0.42	up	0.921	4.96549	7.79677	0.65094
chr6	160321357	160321876	0.350367	1.65351	2.23859	1138	1398	-	-1398	ENSG00000236823	595	0	no	NA	0	no	NA	2.1724	3.41305	0.651767
chr21	29817446	29817801	0.222961	1.29275	2.53558	576	754	-	-754	ENSG00000232855	900	-0.47	down	0.663	0.48	up	1	3.84348	6.04328	0.652918
chr13	27135745	27136408	0.382219	2.43517	2.67155	3278	3609	-	-3609	WASF3	4819	1.78	up	1.3e-152	0.69	up	6.84e-20	3.84348	6.04328	0.652918
chr8	38858602	38859104	0.254812	1.0823	2.08659	4057	4308	-	-4308	ADAM9	3836	0.07	up	0.501	0.18	up	0.0563	2.14853	3.38173	0.654412
chr7	54971767	54972228	0.318515	1.26268	1.98706	28918	29148	+	29148	ENSG00000218586	352	0.62	up	0.206	0.4	up	0.654	1.31299	2.06661	0.654412
chr8	49502473	49503155	0.41407	2.34498	2.50163	-194	147	+	147	FLJ46365	3549	10000	up	1	-1.07	down	1	3.19892	5.04129	0.656205
chr10	28491619	28492316	0.477773	1.68358	1.81713	-156	193	+	193	MPP7	832	0.5	up	0.697	-0.08	down	1	1.76657	2.7868	0.657658
chr6	113966601	113967287	0.159258	1.71364	3.42763	3989	4332	+	4332	ENSG00000230943	327	0.15	up	1	-1.32	down	0.799	1.76657	2.7868	0.657658
chr14	87105559	87105944	0.222961	1.17249	2.39471	1011290	1011482	-	-1011482	FLRT2	7179	-0.52	down	1.3e-10	-0.71	down	3.96e-16	1.52784	2.41105	0.658164
chr10	82258607	82259145	0.41407	1.47313	1.83094	6036	6305	-	-6305	AK054854	2265	0.23	up	1	-10000	down	0.673	2.93633	4.63423	0.658317
chr10	104512819	104513576	0.509625	1.86396	1.87086	9092	9471	-	-9471	C10orf26	4109	1.54	up	1.68e-157	0.76	up	3.83e-28	3.74799	5.91803	0.658999
chr16	73053984	73054665	0.477773	1.92409	2.00978	7706	8046	-	-8046	LOC100506152	574	0	no	NA	0	no	NA	2.33951	3.69486	0.659311
chr21	46461043	46461630	0.191109	1.29275	2.75797	29240	29534	+	29534	C21orf122	2257	1.04	up	3.27e-06	1.02	up	4.58e-05	7.5676	11.9613	0.660468
chr22	34054640	34055269	0.286664	2.34498	3.03214	1438	1752	-	-1752	LARGE	549	-1.96	down	1.27e-19	-2.66	down	9.11e-41	0.93103	1.47168	0.660564
chr20	45955449	45955861	0.350367	0.811724	1.21212	5951	6157	-	-6157	LOC100131496	2253	1.93	up	0.161	1	up	0.786	2.55436	4.03929	0.661138
chr13	75344311	75344951	0.41407	2.67568	2.69196	57739	58059	+	58059	ENSG00000225944	1528	-0.1	down	1	0.16	up	0.974	2.31564	3.66354	0.66183
chr7	139376001	139376330	0.318515	0.931979	1.54893	36800	36964	+	36964	HIPK2	1654	2.11	up	3.28e-154	1.21	up	1.03e-26	0.692304	1.09593	0.66268
chr6	70403795	70404151	0.41407	1.26268	1.60854	3016	3194	-	-3194	LMBRD1	2471	-10000	down	0.38	10000	up	1	2.07691	3.2878	0.66268
chr8	80238430	80238848	0.159258	1.11236	2.80419	11724	11933	-	-11933	ENSG00000253659	633	0	no	NA	0	no	NA	2.53049	4.00798	0.663457
chr12	76653392	76653941	0.350367	1.59338	2.18516	84326	84600	+	84600	BBS10	3583	0.57	up	1.89e-08	0.29	up	0.0352	3.10343	4.91604	0.663631
chr3	160867261	160867666	0.350367	1.29275	1.8835	33644	33847	+	33847	AK001076	1632	0	no	NA	0	no	NA	0.572942	0.908058	0.664396
chr3	114215651	114216211	0.254812	1.35287	2.40852	3027	3307	+	3307	ZBTB20	490	10000	up	0.663	10000	up	1	1.14588	1.81612	0.664396
chr15	39186371	39187101	0.41407	2.10447	2.34551	20335	20700	-	-20700	AK090546	2049	2.97	up	4.49e-22	1.37	up	0.0028	3.41378	5.41704	0.666135
chr2	161886876	161887677	0.382219	3.5776	3.22652	17440	17841	+	17841	ENSG00000232337	1941	0	no	NA	0	no	NA	2.84084	4.50898	0.666485
chr16	28175351	28176022	0.445922	2.52536	2.50163	1078	1414	+	1414	XPO6	3803	0.06	up	0.455	-0.01	down	0.952	1.12201	1.7848	0.669679
chr12	117096370	117096810	0.41407	1.53326	1.88865	51169	51389	+	51389	AK074371	1432	1.09	up	0.551	0.92	up	0.673	1.79044	2.84942	0.670354
chr1	204263551	204263932	0.127406	1.38294	3.44023	6268	6459	-	-6459	PLEKHA6	7007	5.08	up	0	2.4	up	1.19e-29	2.45887	3.91404	0.670661
chr13	93459586	93460143	0.509625	1.17249	1.20207	85718	85997	-	-85997	ENSG00000235984	393	0	no	NA	0	no	NA	1.33686	2.12924	0.671486
chr6	154731686	154732201	0.445922	1.71364	1.9422	-104	153	+	153	CNKSR3	536	1.5	up	5.42e-15	0.84	up	0.00415	2.53049	4.03929	0.674685
chr2	30594811	30595137	0.541476	0.992107	0.873598	19514	19677	-	-19677	LOC285043	2187	1.53	up	0.273	0.26	up	1	1.81432	2.91205	0.682609
chr4	138584931	138585798	0.605179	1.86396	1.62294	8602	9036	-	-9036	ENSG00000250126	396	0	no	NA	-0.15	down	1	4.15383	6.66953	0.683144
chr10	77307088	77307496	0.509625	1.14243	1.16459	15274	15478	-	-15478	AK098511	1934	0	no	NA	10000	up	1	2.33951	3.75748	0.683558
chr1	12524545	12525151	0.445922	2.1646	2.27924	-156	147	+	147	VPS13D	3836	0.61	up	1.4e-09	-0.03	down	1	2.33951	3.75748	0.683558
chr14	75446085	75446640	0.350367	1.17249	1.74264	22972	23250	+	23250	EIF2B2	1541	0.03	up	0.666	0.23	up	0.0561	3.29441	5.29179	0.683733
chr17	27972434	27973026	0.350367	1.68358	2.26459	1686	1982	+	1982	SSH2	1796	0.65	up	0.0317	0.18	up	0.673	2.10079	3.38173	0.686834
chr7	18733180	18733810	0.541476	1.68358	1.63656	24714	25029	-	-25029	HDAC9	4102	-1.64	down	1.51e-51	0.07	up	0.933	1.05039	1.69087	0.686834
chr17	66573011	66573486	0.509625	1.38294	1.44023	18442	18680	-	-18680	FAM20A	3702	-0.95	down	1.88e-39	-1.23	down	2.58e-25	3.24667	5.22916	0.687619
chr14	68858332	68858690	0.637031	1.89402	1.57202	19484	19663	+	19663	RAD51L1	417	-0.06	down	0.956	0.24	up	0.984	2.07691	3.35042	0.689901
chr14	55979346	55979746	0.350367	0.992107	1.50163	30373	30573	+	30573	ENSG00000213641	769	-0.32	down	0.0892	0.11	up	0.825	0.310343	0.500997	0.690938
chr5	81722305	81722861	0.700734	1.26268	0.849552	39509	39787	-	-39787	ATP6AP1L/FLJ41309	3524	-0.33	down	0.639	0.01	up	0.863	1.24137	2.00399	0.690938
chr11	78512146	78512798	0.605179	1.92409	1.66874	3658	3984	+	3984	ODZ4	453	-1.2	down	0.00713	0.51	up	0.423	2.88858	4.66554	0.691683
chr5	121304864	121305230	0.254812	2.04434	3.00413	7208	7391	-	-7391	SRFBP1	2170	0.09	up	0.839	0.08	up	0.698	1.95755	3.16255	0.692037
chr3	112348116	112348661	0.286664	1.47313	2.36145	8284	8556	+	8556	CCDC80	781	-0.43	down	4.91e-16	-0.47	down	2.69e-10	1.02652	1.65955	0.693033
chr3	30512474	30513039	0.318515	1.7437	2.45272	53198	53481	+	53481	ENSG00000227260	436	-10000	down	0.639	10000	up	1	2.24402	3.63223	0.69477
chr15	40384407	40384881	0.318515	1.23262	1.95229	419	656	-	-656	BMF	852	-0.07	down	0.977	-1.2	down	0.344	1.52784	2.47368	0.695158
chr3	55443811	55444351	0.605179	1.20255	0.990667	47954	48224	-	-48224	ENSG00000242775	384	1.33	up	1	0.39	up	1	2.02917	3.2878	0.696232
chr8	19266126	19266851	0.605179	1.62345	1.42363	-54	308	-	-308	CSGALNACT1	544	-0.08	down	0.828	-1.07	down	0.00827	1.31299	2.12924	0.697481
chr15	63531082	63531477	0.318515	0.841788	1.40209	20320	20517	+	20517	RAB8B	2400	-0.11	down	0.433	-0.05	down	0.799	1.31299	2.12924	0.697481
chr3	134182845	134183499	0.605179	1.50319	1.31259	-45	282	+	282	LOC100507224	542	0	no	NA	0	no	NA	4.03446	6.54428	0.697857
chr1	109913214	109913802	0.350367	1.50319	2.10109	1003	1297	-	-1297	SORT1	759	1.51	up	8.66e-76	1.81	up	1.96e-38	3.72412	6.04328	0.698433
chr15	91103383	91103961	0.382219	1.26268	1.72402	12830	13119	+	13119	LOC100507079	1793	0	no	NA	0	no	NA	2.41113	3.91404	0.698951
chr6	85895755	85896201	0.254812	1.80383	2.82356	18288	18511	-	-18511	ENSG00000220291	1004	0	no	NA	0	no	NA	2.0053	3.25648	0.6995
chr9	87839313	87839801	0.254812	1.62345	2.67155	64448	64692	-	-64692	ENSG00000226590	269	0	no	NA	0	no	NA	1.67108	2.72417	0.705038
chr1	235132917	235133523	0.222961	1.86396	3.06351	33171	33474	-	-33474	ENSG00000238005	889	-0.32	down	0.709	-0.22	down	1	3.89123	6.35641	0.707985
chr3	66083848	66084449	0.350367	1.65351	2.23859	34836	35137	+	35137	SLC25A26	1827	0.16	up	0.59	-0.03	down	0.908	2.31564	3.78879	0.710328
chr18	61220336	61220677	0.573328	1.0823	0.916666	2716	2887	+	2887	SERPINB12	1278	10000	up	1	10000	up	1	2.50662	4.10192	0.710555
chr22	28538284	28538856	0.445922	1.56332	1.80975	33913	34199	-	-34199	TTC28	906	-0.37	down	0.267	0.49	up	0.1	3.07956	5.04129	0.711067
chr3	40918906	40919876	0.445922	3.84817	3.10931	14789	15274	-	-15274	ENSG00000231873	500	0.52	up	1	0	no	NA	3.36603	5.51097	0.711258
chr21	39654852	39655343	0.318515	2.01428	2.66083	2852	3097	+	3097	KCNJ15	1979	1.32	up	5.07e-14	0.24	up	0.46	3.74799	6.13722	0.711467
chr2	237570615	237571174	0.286664	1.62345	2.50163	70852	71131	+	71131	ENSG00000232328	561	0	no	NA	0	no	NA	4.03446	6.6069	0.711597
chr15	25637255	25637676	0.222961	1.7437	2.96729	12932	13143	+	13143	UBE3A	141	-0.03	down	1	0.04	up	0.983	1.62333	2.66155	0.713306
chr1	183994380	183994882	0.254812	1.56332	2.61711	11729	11980	+	11980	GLT25D2	2352	1.04	up	2.79e-09	0.62	up	0.00346	1.81432	2.97467	0.713306
chr2	118818819	118819339	0.382219	1.53326	2.00413	26691	26951	+	26951	INSIG2	567	-0.11	down	0.634	-0.18	down	0.498	1.90981	3.13123	0.713306
chr6	48003925	48004441	0.637031	1.32281	1.05417	29723	29981	+	29981	LOC100505931/LOC100509437	1173	-0.53	down	0.423	0.65	up	0.194	1.24137	2.0353	0.713306
chr3	30552918	30553553	0.350367	1.62345	2.21212	12684	13001	+	13001	ENSG00000227260	436	-10000	down	0.639	10000	up	1	2.48275	4.0706	0.713306
chr4	138882070	138882677	0.286664	1.56332	2.44718	65898	66202	+	66202	LOC641365	2017	0	no	NA	0	no	NA	1.79044	2.94336	0.717148
chr1	33618852	33619260	0.445922	1.35287	1.60116	6033	6237	+	6237	TRIM62	806	-0.19	down	0.451	0.11	up	0.943	1.40848	2.31711	0.718188
chr4	74974621	74975211	0.254812	2.10447	3.04595	4680	4975	+	4975	MTHFD2L	1798	1.12	up	0.0801	0.53	up	0.792	2.72147	4.47767	0.718359
chr15	70778700	70779778	0.445922	2.31492	2.3761	59841	60380	-	-60380	LOC283674	1574	10000	up	1	0	no	NA	2.72147	4.47767	0.718359
chr12	741556	741974	0.350367	1.68358	2.26459	1499	1708	-	-1708	LOC100049716	2338	0.19	up	0.467	-0.35	down	0.451	2.435	4.00798	0.718952
chr2	180201853	180202363	0.477773	1.17249	1.29518	51419	51674	-	-51674	ENSG00000237477	552	0	no	NA	0	no	NA	1.02652	1.69087	0.72
chr16	24657353	24658137	0.159258	3.81811	4.58342	14606	14998	+	14998	FLJ45256	2907	-10000	down	0.639	0	no	NA	1.02652	1.69087	0.72
chr1	66736831	66737433	0.286664	1.53326	2.41917	3639	3940	-	-3940	PDE4B	1136	-2.57	down	0.00389	-0.51	down	0.695	3.9151	6.45034	0.720326
chr19	19701966	19702327	0.509625	0.992107	0.96106	7850	8031	+	8031	PBX4	1319	0	down	0.966	0.39	up	0.939	1.86206	3.06861	0.720685
chr4	184557978	184558589	0.254812	2.01428	2.98276	2200	2505	+	2505	RWDD4	2590	0.73	up	6.93e-07	0.43	up	0.0613	1.67108	2.75549	0.721526
chr12	125564457	125565099	0.318515	1.02217	1.6822	1541	1862	-	-1862	AACS	777	-0.45	down	0.0266	0.36	up	0.227	1.4801	2.44236	0.722584
chr8	86847751	86848562	0.41407	1.68358	2.02358	3372	3778	+	3778	ENSG00000253154	517	2.55	up	0.045	10000	up	0.238	1.38461	2.2858	0.723221
chr5	83899685	83900176	0.573328	1.413	1.30133	113102	113347	-	-113347	ENSG00000250320	566	-0.43	down	0.0337	0.34	up	0.0892	0.644559	1.06462	0.723953
chrx	9430930	9431404	0.318515	0.78166	1.29518	999999999	999999999	?	1									0.644559	1.06462	0.723953
chr8	123011920	123012520	0.254812	1.68358	2.72402	45041	45341	-	-45341	ENSG00000254303	792	-10000	down	0.01	0.12	up	0.951	1.28912	2.12924	0.723953
chr1	8064950	8065673	0.382219	3.33709	3.12612	486	848	-	-848	ERRFI1	479	0.18	up	0.0584	1.55	up	1.41e-134	2.45887	4.0706	0.727245
chr4	102112675	102113182	0.477773	1.65351	1.79114	4092	4346	+	4346	PPP3CA	1509	-0.52	down	1.52e-07	-0.53	down	0.000242	0.907158	1.50299	0.728413
chr12	115356625	115357123	0.350367	1.17249	1.74264	234656	234905	-	-234905	TBX3	2767	-1.16	down	5.27e-50	-1.26	down	9.51e-39	1.71882	2.84942	0.729247
chr20	45962738	45963331	0.127406	1.92409	3.91667	13240	13536	-	-13536	LOC100131496	2253	1.93	up	0.161	1	up	0.786	2.07691	3.44436	0.729794
chr10	78343394	78343904	0.318515	1.56332	2.29518	23469	23724	-	-23724	C10orf11	3045	1.4	up	1.08e-05	0.53	up	0.453	2.24402	3.72617	0.731607
chr6	80838084	80838646	0.191109	1.83389	3.26244	1098	1379	-	-1379	BCKDHB	300	-0.21	down	0.629	0.79	up	0.118	1.07427	1.7848	0.732415
chr6	1477507	1478030	0.350367	1.65351	2.23859	35906	36168	+	36168	ENSG00000218027	1589	0.35	up	0.545	0.64	up	0.4	1.79044	2.97467	0.732415
chr3	29376713	29377209	0.222961	1.50319	2.75317	40856	41104	+	41104	AK021991	1914	0	no	NA	0	no	NA	2.05304	3.41305	0.733297
chr16	84865976	84866575	0.445922	1.77377	1.99195	12354	12653	-	-12653	CRISPLD2	1689	0.7	up	2.7e-10	0.42	up	2.66e-05	2.74535	4.5716	0.735712
chr6	106245818	106246321	0.573328	1.35287	1.23859	129946	130197	-	-130197	ENSG00000219088	1673	1.29	up	0.0405	-0.92	down	0.271	1.40848	2.34843	0.737553
chr2	228682856	228683901	0.350367	4.26907	3.60698	576	1098	-	-1098	CCL20	839	0.26	up	0.873	1.09	up	0.0569	2.81696	4.69685	0.737553
chr9	123883941	123884453	0.477773	1.02217	1.09724	-138	118	-	-118	CEP110	3372	0.17	up	0.567	-0.32	down	0.383	1.05039	1.75349	0.739301
chr13	113394834	113395333	0.350367	0.962043	1.45723	2148	2397	-	-2397	LOC100128278	1626	0	no	NA	0	no	NA	2.26789	3.78879	0.740385
chr4	186696341	186696882	0.286664	1.53326	2.41917	-264	7	-	-7	SORBS2	629	2.47	up	1.62e-75	1.18	up	8.38e-13	3.12731	5.22916	0.741659
chr4	129985817	129986269	0.222961	0.871852	1.96729	20696	20922	+	20922	SCLT1	1839	0.41	up	0.0773	-0.32	down	0.304	0.429706	0.720184	0.745015
chr17	34105232	34105573	0.191109	1.44306	2.91667	-64	107	+	107	MMP28	1021	0.72	up	0.0399	1.45	up	0.00346	2.74535	4.60291	0.74556
chr7	19444385	19445197	0.222961	2.31492	3.3761	51228	51634	-	-51634	ENSG00000223838	566	10000	up	0.663	10000	up	0.53	2.81696	4.72816	0.747139
chr6	89745087	89746014	0.477773	1.95415	2.03214	23334	23797	+	23797	ENSG00000220960	482	-0.13	down	0.797	0.21	up	0.994	1.95755	3.2878	0.748071
chr5	162936423	162936925	0.41407	1.26268	1.60854	2481	2732	+	2732	MAT2B	572	0.12	up	0.515	0.44	up	0.0191	0.763922	1.28381	0.74893
chr2	205707295	205707825	0.159258	1.56332	3.29518	122048	122313	+	122313	PARD3B	3191	0.74	up	9.4e-14	0.56	up	0.00056	1.69495	2.84942	0.749425
chr3	41309418	41310001	0.318515	1.38294	2.1183	7832	8123	-	-8123	CTNNB1	607	1.67	up	8.67e-122	0.42	up	7.02e-05	1.86206	3.13123	0.749832
chr2	43062815	43063609	0.286664	1.32281	2.20617	4633	5030	-	-5030	AK024234	2360	0.64	up	0.798	-0.11	down	1	1.26525	2.12924	0.75092
chr5	124860756	124861339	0.445922	1.26268	1.50163	129084	129375	-	-129375	ENSG00000251554	602	0	no	NA	0	no	NA	2.6976	4.54029	0.751108
chr5	67323260	67323784	0.382219	1.32281	1.79114	59263	59525	+	59525	ENSG00000253801	276	1.13	up	0.00211	0.38	up	0.496	2.26789	3.82011	0.752259
chr12	46949780	46950416	0.159258	2.28485	3.84267	18495	18813	-	-18813	LOC100288798	457	1.41	up	0.00263	2	up	0.00208	3.10343	5.22916	0.752714
chr3	64276976	64277582	0.605179	2.52536	2.06106	23321	23624	-	-23624	PRICKLE2	573	0.61	up	0.249	-0.22	down	0.92	1.50397	2.5363	0.753948
chr3	32010076	32010951	0.286664	1.98421	2.79114	96	533	+	533	OSBPL10	533	0.98	up	0.000259	0.91	up	0.00397	2.98407	5.04129	0.75651
chr11	128366751	128367608	0.445922	2.46524	2.46686	6276	6705	-	-6705	ETS1	396	-0.65	down	0.0191	0.17	up	0.777	2.14853	3.63223	0.757506
chr9	79269447	79270217	0.222961	2.46524	3.46686	1982	2367	-	-2367	PRUNE2	903	-0.16	down	0.228	0.46	up	5.21e-05	3.36603	5.69885	0.759621
chr1	221508686	221509176	0.605179	2.79594	2.2079	86	331	+	331	LOC400804	645	-1.07	down	0.535	-0.65	down	0.799	2.29177	3.88273	0.760612
chr15	72631134	72631665	0.318515	1.11236	1.80419	4110	4375	+	4375	HEXA	2737	-0.34	down	7.87e-07	-0.29	down	0.00105	1.14588	1.94137	0.760612
chr8	59636502	59637201	0.350367	1.47313	2.07194	62518	62867	-	-62867	AK092144	2128	0.48	up	0.242	-0.66	down	0.0706	1.14588	1.94137	0.760612
chr1	154391944	154392492	0.222961	1.56332	2.80975	4331	4605	-	-4605	ENSG00000228264	769	0.1	up	0.817	0.18	up	0.431	2.6976	4.5716	0.761023
chr14	96643114	96643737	0.477773	1.71364	1.84267	27398	27709	+	27709	BDKRB2	4197	-3.1	down	0	-0.68	down	1.29e-16	2.36338	4.00798	0.762021
chr5	66391166	66391713	0.668883	1.50319	1.16821	5136	5409	-	-5409	MAST4	438	-0.5	down	0.708	1.07	up	0.488	2.60211	4.41504	0.762745
chr11	95072023	95072416	0.350367	0.962043	1.45723	69446	69642	-	-69642	SESN3	1924	1.68	up	4.34e-47	0.83	up	0.0212	1.45623	2.47368	0.764421
chr15	39317444	39317926	0.382219	1.26268	1.72402	151408	151649	-	-151649	AK090546	2049	2.97	up	4.49e-22	1.37	up	0.0028	3.77187	6.41903	0.767077
chr2	20001245	20001776	0.254812	1.86396	2.87086	24234	24500	+	24500	ZCD1B	327	0.11	up	0.889	0.04	up	1	1.59946	2.72417	0.768232
chr3	106926940	106927452	0.445922	1.35287	1.60116	32022	32278	+	32278	LOC100302640	875	0.68	up	0.401	0.58	up	0.673	3.03182	5.16654	0.769015
chr11	88053179	88053697	0.222961	1.413	2.6639	284	543	+	543	CTSC	6091	0.8	up	0.0143	-0.29	down	0.598	0.238726	0.40706	0.769889
chr9	33029357	33029657	0.382219	1.35287	1.82356	4009	4159	-	-4159	AK095541	2251	-0.1	down	0.326	-0.25	down	0.00496	0.716177	1.22118	0.769889
chrx	10737992	10738326	0.700734	0.931979	0.411431	999999999	999999999	?	1									0.954903	1.62824	0.769889
chr7	26744273	26744910	0.318515	2.67568	3.07047	14348	14666	-	-14666	SKAP2	679	0.18	up	0.663	0.22	up	0.251	0.716177	1.22118	0.769889
chr10	77879151	77879700	0.191109	1.38294	2.85527	60696	60971	-	-60971	C10orf11	2102	-1.72	down	0.0245	-0.68	down	0.371	3.6525	6.23116	0.770614
chr12	92472052	92472551	0.286664	1.98421	2.79114	61502	61752	+	61752	BTG1	4680	0.18	up	0.0261	-0.19	down	0.0965	3.70025	6.32509	0.773465
chr6	52898511	52898955	0.41407	1.20255	1.53815	3886	4108	+	4108	ICK	1854	-0.49	down	1.33e-05	-0.24	down	0.162	2.12466	3.63223	0.773625
chr10	78435526	78436199	0.477773	1.47313	1.62449	115600	115937	-	-115937	C10orf11	3045	1.4	up	1.08e-05	0.53	up	0.453	2.02917	3.47567	0.776403
chr9	123346289	123346775	0.732586	1.20255	0.715032	3841	4084	-	-4084	CDK5RAP2	546	1.48	up	0.000407	0.76	up	0.385	1.16976	2.00399	0.776668
chr3	32463418	32463838	0.445922	1.26268	1.50163	19491	19701	+	19701	CMTM7	368	0.07	up	0.992	-0.07	down	0.979	1.79044	3.06861	0.777269
chr3	28417686	28418329	0.159258	1.56332	3.29518	13658	13979	+	13979	ZCWPW2	1660	-0.17	down	0.635	-0.7	down	0.368	0.620687	1.06462	0.778401
chr7	90208375	90208851	0.318515	1.29275	2.021	11082	11320	+	11320	LOC100507508	317	2.61	up	0.00292	0.06	up	1	1.38461	2.37974	0.781324
chr7	127876888	127877438	0.41407	1.05223	1.34551	3893	4168	+	4168	LEP	3427	5.86	up	0	3.22	up	1.05e-176	1.83819	3.16255	0.782803
chr10	4583398	4583958	0.41407	1.38294	1.73979	108419	108699	+	108699	LOC100216001	1394	0.87	up	0.156	-0.67	down	0.609	2.98407	5.13522	0.783145
chr17	48463600	48464258	0.382219	2.40511	2.65363	953	1282	-	-1282	LRRC59	2052	0.34	up	4.14e-08	0.32	up	0.000103	0.381961	0.657559	0.783695
chr6	112005005	112005479	0.286664	1.23262	2.10429	7258	7495	-	-7495	FYN	649	0.88	up	9.42e-29	0.35	up	0.00158	3.55701	6.13722	0.786919
chr1	218879326	218879876	0.41407	1.65351	1.99759	175066	175341	+	175341	ENSG00000226693	1051	-1.06	down	0.759	10000	up	0.752	2.72147	4.69685	0.787306
chr7	40364399	40364905	0.191109	1.413	2.88629	8042	8295	-	-8295	C7orf10	1180	0.27	up	0.0431	0.04	up	0.982	2.26789	3.91404	0.787306
chr7	104591050	104591555	0.382219	1.32281	1.79114	288	540	-	-540	LOC100216545/LOC100216546	538	-1.64	down	0.38	0.47	up	0.677	1.36074	2.34843	0.787306
chr12	50464106	50464524	0.509625	1.14243	1.16459	-1	208	+	208	ACCN2	1223	-0.13	down	0.759	-0.6	down	0.532	0.978775	1.69087	0.788713
chr1	64626882	64627578	0.382219	1.71364	2.16459	9402	9750	+	9750	ENSG00000223949	2189	-10000	down	0.000117	-3.37	down	0.000241	2.86471	4.97866	0.79737
chr8	33210838	33211461	0.382219	1.80383	2.23859	16880	17192	+	17192	C8orf41/FUT10	3677	0.4	up	0.00706	0.61	up	0.000424	1.09814	1.91005	0.798553
chr6	46420902	46421315	0.318515	1.14243	1.84267	3398	3605	+	3605	RCAN2	732	1.29	up	9.74e-30	0.65	up	0.00019	2.26789	3.94536	0.798802
chr2	238036934	238037478	0.382219	1.83389	2.26244	4194	4466	-	-4466	ENSG00000224844	669	0	no	NA	0	no	NA	4.48804	7.82809	0.802573
chr10	29935205	29936351	0.382219	4.26907	3.48145	-497	76	-	-76	AK130534	1996	10000	up	1	-10000	down	0.673	2.53049	4.41504	0.803009
chr1	228416164	228416845	0.127406	1.50319	3.56052	11036	11376	-	-11376	OBSCN	732	-2.06	down	0.353	1.14	up	0.853	1.50397	2.63024	0.806415
chr11	128110367	128110880	0.222961	1.29275	2.53558	217776	218032	+	218032	ETS1	4981	-0.21	down	0.00561	0	down	1	0.859412	1.50299	0.806415
chr10	81223830	81224401	0.668883	1.35287	1.0162	18448	18733	-	-18733	ZCCHC24	4933	0.52	up	5.32e-20	0.39	up	1.68e-06	0.787795	1.37774	0.806415
chr1	59680251	59681001	0.573328	1.47313	1.36145	15958	16333	-	-16333	LOC729467	772	10000	up	1	10000	up	1	0.716177	1.25249	0.806415
chr15	51379617	51380192	0.382219	1.56332	2.03214	6694	6982	+	6982	TNFAIP8L3	1986	1.36	up	2.66e-88	1.07	up	2.17e-36	0.859412	1.50299	0.806415
chr5	32760151	32760625	0.254812	0.992107	1.96106	22509	22746	+	22746	NPR3	774	1.43	up	1.01e-63	1.49	up	1.18e-61	1.28912	2.25449	0.806415
chr4	89533118	89533693	0.191109	1.65351	3.11306	5918	6206	-	-6206	HERC3	574	0.44	up	0.168	0.79	up	0.0182	3.15118	5.54228	0.814589
chr17	57500701	57501076	0.573328	1.17249	1.03214	21606	21793	-	-21793	YPEL2	5232	1.47	up	1.47e-51	0.9	up	9.1e-15	2.02917	3.56961	0.814877
chr2	102459524	102459901	0.541476	1.53326	1.50163	798	986	+	986	MAP4K4	2648	-0.55	down	6.28e-23	-0.15	down	0.162	1.95755	3.44436	0.815185
chr2	146509693	146510251	0.605179	1.7437	1.52672	73602	73881	+	73881	ENSG00000234119	1546	0.05	up	0.952	0.09	up	1	3.77187	6.63822	0.815517
chr3	29457888	29458438	0.286664	1.71364	2.57963	17910	18185	+	18185	RBMS3	413	-0.32	down	0.471	-0.7	down	0.105	0.907158	1.59693	0.815876
chr1	217448532	217449049	0.509625	1.47313	1.53138	137434	137693	-	-137693	ESRRG	5311	0	no	NA	0	no	NA	1.7427	3.06861	0.816263
chr4	121214218	121215071	0.382219	1.98421	2.3761	48140	48567	+	48567	ENSG00000225665	592	0.01	up	0.962	0.26	up	0.582	1.38461	2.44236	0.818799
chr2	109934588	109935551	0.318515	2.22472	2.80419	24664	25146	+	25146	LOC729164	1279	0	no	NA	0	no	NA	2.6976	4.75948	0.819126
chr18	52409746	52410356	0.541476	1.92409	1.8292	1623	1928	+	1928	ENSG00000243857	839	0	no	NA	0	no	NA	1.24137	2.19186	0.820221
chr7	47691043	47691526	0.222961	1.68358	2.91667	3316	3558	+	3558	C7orf65	2911	2.2	up	0.567	0.72	up	0.852	3.10343	5.47966	0.820221
chr7	4707717	4708327	0.222961	1.20255	2.43124	7938	8243	+	8243	AK129710	2050	-10000	down	0.639	0	no	NA	1.09814	1.94137	0.822012
chr10	5075466	5076102	0.254812	1.65351	2.69803	1447	1765	+	1765	AKR1C3	998	0.29	up	0.243	-0.4	down	0.292	1.57559	2.7868	0.822717
chr14	62078728	62079287	0.541476	1.29275	1.25547	41414	41694	-	-41694	FLJ22447	1306	-0.21	down	0.96	-1.57	down	7.01e-06	1.90981	3.38173	0.824337
chr13	40638819	40639434	0.318515	3.21683	3.33621	116512	116820	+	116820	ENSG00000230710	834	10000	up	0.01	0	no	NA	1.90981	3.38173	0.824337
chr1	56539518	56540092	0.509625	1.83389	1.8474	71301	71588	+	71588	ENSG00000235612	731	10000	up	1	10000	up	1	1.83819	3.25648	0.825031
chr9	95172610	95173160	0.318515	1.0823	1.76466	2106	2381	+	2381	OMD	3556	5.67	up	0	5.27	up	3.47e-207	0.405834	0.720184	0.827477
chr5	81714079	81714478	0.509625	0.992107	0.96106	31282	31482	-	-31482	ATP6AP1L/FLJ41309	3524	-0.33	down	0.639	0.01	up	0.863	2.02917	3.60092	0.827477
chr7	55245275	55245889	0.41407	1.56332	1.91667	1554	1861	+	1861	LOC100507500	2827	-0.24	down	0.419	-0.71	down	0.0142	1.95755	3.47567	0.828242
chr9	124135442	124135876	0.573328	1.89402	1.72402	1643	1860	+	1860	ENSG00000227355	440	0	no	NA	10000	up	1	1.4801	2.63024	0.829499
chr8	27805901	27806456	0.350367	1.44306	2.0422	26180	26457	-	-26457	SCARA5	555	0.68	up	0.663	0.83	up	0.896	2.79309	4.97866	0.833896
chr2	38753323	38753801	0.382219	1.38294	1.85527	10441	10680	-	-10680	ENSG00000231367	1156	10000	up	1	0	no	NA	0.596814	1.06462	0.834984
chr16	72231847	72232319	0.637031	1.50319	1.23859	25498	25734	-	-25734	PMFBP1	3675	3.04	up	0.000735	0.64	up	1	0.262598	0.469685	0.838837
chr9	117507582	117508242	0.222961	1.35287	2.60116	38673	39003	+	39003	TNFSF15	6396	1.71	up	5.89e-06	-0.39	down	0.724	2.10079	3.75748	0.838837
chr10	126028349	126029020	0.573328	1.86396	1.70094	56852	57188	+	57188	OAT	1864	0.5	up	3e-19	0.2	up	0.0253	2.29177	4.10192	0.839838
chr2	135019165	135019762	0.222961	1.53326	2.78174	6950	7249	-	-7249	MGAT5	816	0.1	up	0.609	0.33	up	0.0176	2.74535	4.91604	0.840508
chr6	138050959	138051358	0.41407	0.871852	1.07421	-50	149	+	149	LOC100507406	703	0	no	NA	10000	up	0.752	1.62333	2.91205	0.843074
chr3	23083697	23084173	0.445922	1.02217	1.19677	50624	50862	-	-50862	ENSG00000231915	1760	0	no	NA	10000	up	1	2.05304	3.69486	0.847756
chr9	112878715	112879167	0.0955546	1.02217	3.41917	8614	8840	+	8840	AKAP2	6802	0.04	up	0.745	0.05	up	0.77	1.2175	2.19186	0.848235
chr9	14366048	14366376	0.318515	1.23262	1.95229	8141	8305	-	-8305	ENSG00000225472	793	0	no	NA	0	no	NA	1.2175	2.19186	0.848235
chr5	39760788	39761330	0.541476	1.44306	1.41417	39173	39444	-	-39444	ENSG00000250492	2530	0.11	up	0.74	0.03	up	0.991	2.29177	4.13323	0.850809
chr2	46309501	46310257	0.318515	1.68358	2.40209	3534	3912	-	-3912	ENSG00000232696	464	0	no	NA	0	no	NA	2.33951	4.22717	0.853483
chr2	223964542	223965222	0.541476	3.87824	2.84043	44187	44527	-	-44527	KCNE4	3291	0.15	up	0.122	0.56	up	1.27e-12	1.57559	2.84942	0.854778
chr5	16886430	16886783	0.382219	1.32281	1.79114	8594	8770	-	-8770	MYO10	7551	0.2	up	0.00379	0.45	up	4.47e-10	2.26789	4.10192	0.854945
chr1	70380928	70381358	0.350367	1.23262	1.81479	3647	3862	+	3862	PIN1P1	996	-0.13	down	0.78	0.2	up	0.428	0.692304	1.25249	0.855325
chr14	68925651	68926276	0.541476	1.38294	1.35277	8690	9003	+	9003	RAD51L1	1036	-0.25	down	0.58	-0.02	down	1	1.19363	2.16055	0.856046
chr12	125249407	125250037	0.477773	2.1646	2.1797	12137	12452	+	12452	SCARB1	2613	0.14	up	0.238	-0.06	down	0.75	1.69495	3.06861	0.85634
chr7	7541728	7542131	0.41407	0.931979	1.17042	9222	9423	+	9423	COL28A1	1124	0	no	NA	0	no	NA	0.501324	0.908058	0.857041
chr21	38432467	38432979	0.605179	1.26268	1.06106	2167	2423	+	2423	PIGP	3437	-0.01	down	1	0.04	up	0.92	1.31299	2.37974	0.857946
chr21	35708633	35709523	0.350367	3.42728	3.29012	11299	11744	-	-11744	SLC5A3/MRPS6	805	3.86	up	0.0176	-0.61	down	1	2.86471	5.19785	0.859527
chr8	54857314	54858007	0.254812	1.98421	2.96106	-122	225	+	225	RGS20	793	-0.63	down	0.186	-0.11	down	0.975	1.43235	2.59892	0.859527
chr6	75601290	75601590	0.445922	1.44306	1.69427	41090	41240	-	-41240	ENSG00000219736	1408	10000	up	0.146	10000	up	0.163	2.05304	3.72617	0.859931
chr3	177552770	177553250	0.254812	1.29275	2.34293	7199	7439	-	-7439	ENSG00000231574	581	-0.42	down	1	10000	up	0.752	3.72412	6.76347	0.860863
chr5	138060031	138060556	0.477773	1.35287	1.50163	19564	19827	+	19827	LOC100506280	589	-1.42	down	0.627	0.42	up	1	0.620687	1.12724	0.860863
chr11	128077673	128078345	0.318515	2.07441	2.70326	250311	250647	+	250647	ETS1	4981	-0.21	down	0.00561	0	down	1	2.86471	5.22916	0.868191
chr11	34287966	34288369	0.222961	0.992107	2.15371	11000	11201	+	11201	AK022054	1607	0	no	NA	0	no	NA	1.7427	3.19386	0.873979
chr2	96852956	96853485	0.254812	0.931979	1.87086	370	635	+	635	STARD7	2949	0.49	up	2.55e-14	0.69	up	3.1e-28	1.00265	1.84743	0.881703
chr9	89598291	89599353	0.41407	3.39721	3.03641	17595	18126	+	18126	LOC100506834/LOC100509164	4387	1.7	up	2.15e-07	2.26	up	3.62e-09	3.19892	5.91803	0.887531
chr2	153451345	153451841	0.382219	1.50319	1.97556	12326	12574	+	12574	FMNL2	753	0.01	up	1	0.25	up	0.844	1.33686	2.47368	0.887804
chr2	182931349	182931929	0.318515	1.7437	2.45272	2499	2789	-	-2789	PPP1R1C	410	10000	up	1	0	no	NA	1.43235	2.66155	0.893878
chr8	24062284	24062801	0.222961	2.22472	3.31876	27690	27949	-	-27949	ENSG00000253891	491	10000	up	0.416	-0.95	down	0.799	2.0053	3.72617	0.893878
chr5	55374661	55375140	0.159258	0.871852	2.45272	11462	11701	-	-11701	ENSG00000249236	384	0	no	NA	0	no	NA	1.14588	2.12924	0.893878
chr17	61467478	61467834	0.382219	1.14243	1.57963	486	664	-	-664	TANC2	2939	0.57	up	1.02e-05	0.44	up	0.00191	1.14588	2.12924	0.893878
chr9	137334406	137334806	0.254812	0.841788	1.72402	1975	2175	-	-2175	RXRA	5770	0.31	up	7.09e-06	0.19	up	0.0532	1.59946	2.97467	0.895144
chr15	58843849	58844351	0.41407	2.61555	2.65917	11856	12107	+	12107	LIPC	1530	0.5	up	0.253	0.33	up	0.673	3.41378	6.35641	0.896842
chr2	106646894	106647321	0.477773	1.14243	1.2577	32380	32594	+	32594	C2orf40	438	1.9	up	0.484	10000	up	1	1.93368	3.60092	0.897018
chr3	185376162	185376840	0.477773	2.28485	2.2577	6398	6737	+	6737	IGF2BP2	2375	0.59	up	2.4e-15	0.1	up	0.455	3.29441	6.13722	0.897563
chr7	139432046	139432365	0.254812	1.11236	2.12612	14764	14924	-	-14924	HIPK2	14953	2.57	up	0	0.97	up	1.92e-62	2.55436	4.75948	0.897838
chr12	104571475	104572179	0.41407	1.53326	1.88865	37099	37451	-	-37451	NFYB	3254	0.37	up	0.00198	0.43	up	0.00116	2.72147	5.0726	0.898338
chr12	46782921	46783494	0.445922	2.46524	2.46686	282	569	-	-569	AK023464	3271	0.79	up	0.475	0.66	up	0.921	3.43765	6.41903	0.900933
chr19	16844765	16845126	0.509625	1.17249	1.20207	2316	2496	+	2496	NWD1	4222	0	no	NA	0	no	NA	0.954903	1.7848	0.90234
chr13	40171983	40172401	0.222961	1.05223	2.23859	2952	3161	+	3161	LHFP	603	1.12	up	3.11e-88	0.76	up	4.33e-20	1.12201	2.09793	0.902878
chr17	57406901	57407463	0.445922	1.14243	1.35724	1590	1871	+	1871	YPEL2	5232	1.47	up	1.47e-51	0.9	up	9.1e-15	1.45623	2.72417	0.903584
chr10	114344823	114345251	0.286664	1.50319	2.3906	36192	36406	-	-36406	ENSG00000234017	241	10000	up	0.663	0.76	up	0.896	1.62333	3.0373	0.903828
chr7	96578518	96579482	0.382219	2.01428	2.39779	15357	15839	+	15839	DLX6-AS1	4978	0.37	up	0.21	0.5	up	0.192	1.62333	3.0373	0.903828
chr1	53135280	53135745	0.286664	0.901915	1.65363	-76	157	-	-157	FAM159A	1992	0.7	up	0.729	0	no	NA	2.29177	4.28979	0.904447
chr1	19762424	19762942	0.509625	1.44306	1.50163	1423	1682	+	1682	CAPZB	727	-0.1	down	0.236	0.23	up	0.00905	3.00794	5.63622	0.905951
chr14	89909554	89910076	0.382219	1.26268	1.72402	23417	23678	-	-23678	LOC400236	1077	0.01	up	0.974	0.35	up	0.292	2.0053	3.75748	0.905951
chr6	154708550	154708874	0.191109	0.931979	2.2859	9245	9407	+	9407	AK124909	4620	2.89	up	4.58e-08	0.72	up	0.838	1.00265	1.87874	0.905951
chr1	33793486	33794057	0.637031	1.29275	1.021	1614	1900	+	1900	PHC2	547	0.56	up	8.23e-12	0.07	up	0.619	0.83554	1.56562	0.905951
chr3	29566650	29567293	0.222961	1.77377	2.99195	28964	29286	-	-29286	AK130647	2399	-10000	down	0.639	0	no	NA	1.59946	3.00598	0.910251
chr2	28550927	28551537	0.350367	2.25479	2.68605	2048	2353	-	-2353	MRPL33/BRE	1885	-0.15	down	0.312	0.06	up	0.939	1.59946	3.00598	0.910251
chr6	155337048	155337640	0.159258	1.50319	3.23859	1992	2288	-	-2288	SCAF8	4404	0.08	up	0.583	-0.15	down	0.521	0.93103	1.75349	0.91333
chr16	11198655	11199318	0.573328	2.01428	1.81283	15234	15566	+	15566	CLEC16A	594	-0.15	down	0.726	0.42	up	0.27	1.52784	2.88074	0.91494
chr10	63855248	63855832	0.350367	1.38294	1.9808	868	1160	+	1160	ARID5B	2616	0.1	up	0.353	0.34	up	0.000724	2.50662	4.72816	0.915537
chr3	156333679	156334139	0.350367	1.35287	1.94909	55512	55742	+	55742	LOC100287227	441	1.07	up	0.639	-1.67	down	0.511	1.88593	3.56961	0.920487
chr17	78002901	78003513	0.541476	1.65351	1.61056	6134	6440	+	6440	TBC1D16	3259	0.64	up	8.85e-25	0.46	up	3.04e-06	2.24402	4.25848	0.924252
chr10	33411048	33411501	0.445922	1.26268	1.50163	5448	5674	-	-5674	ENSG00000233387	552	-10000	down	0.639	0	no	NA	0.954903	1.81612	0.927431
chr5	151008103	151008468	0.477773	1.23262	1.36733	32188	32371	+	32371	SPARC	3701	-0.38	down	5.36e-05	-0.12	down	0.618	2.22015	4.22717	0.929035
chr9	107620573	107621071	0.41407	1.23262	1.57378	2567	2816	-	-2816	ABCA1	1084	-1.93	down	2.55e-06	-1.53	down	0.000601	1.52784	2.91205	0.930537
chr2	106071304	106072625	0.254812	3.00638	3.56052	15574	16234	-	-16234	FHL2	1485	0.2	up	0.00144	0.23	up	0.00816	2.84084	5.41704	0.931188
chr22	19280316	19280764	0.477773	1.32281	1.46921	1077	1301	-	-1301	CLTCL1	5346	1.24	up	6.47e-92	0.3	up	0.00711	2.14853	4.10192	0.932948
chr2	12899462	12899801	0.509625	1.29275	1.34293	16602	16772	-	-16772	TRIB2	2841	0.45	up	4.89e-08	0.49	up	5.21e-09	2.02917	3.88273	0.936183
chr8	65669133	65669901	0.382219	2.19466	2.52153	5529	5913	-	-5913	CYP7B1	2144	3.38	up	3.5e-06	0.99	up	0.387	1.19363	2.2858	0.937346
chr7	95237946	95238513	0.509625	1.50319	1.56052	594	878	+	878	ENSG00000231170	558	0	no	NA	0	no	NA	0.93103	1.7848	0.938866
chr17	10543782	10544181	0.605179	0.962043	0.668739	1860	2060	+	2060	MYH3	2296	-1.1	down	9.4e-10	2.2	up	2.17e-28	0.310343	0.594935	0.938866
chr11	10003673	10004124	0.159258	1.47313	3.20945	10436	10661	+	10661	SBF2	978	0.07	up	0.891	0.18	up	0.394	1.28912	2.47368	0.940271
chr16	66223684	66224475	0.350367	3.66779	3.38797	174046	174441	+	174441	CDH5	4248	-0.42	down	0.814	10000	up	0.752	3.03182	5.8241	0.941852
chr4	153882766	153883251	0.509625	1.26268	1.30898	10338	10581	+	10581	FHDC1	1425	0.05	up	0.925	0.49	up	0.921	2.05304	3.94536	0.942393
chr2	109946351	109946808	0.41407	1.413	1.77082	13408	13636	+	13636	LOC729164	1279	0	no	NA	0	no	NA	3.48539	6.70084	0.94302
chr9	130345927	130346246	0.222961	1.20255	2.43124	4658	4818	-	-4818	FAM129B	3760	0.44	up	1.78e-15	0.06	up	0.702	1.43235	2.75549	0.943919
chr18	11954199	11954792	0.191109	1.11236	2.54116	26264	26561	+	26561	IMPA2	1224	3.93	up	0	2.19	up	1.23e-148	2.55436	4.91604	0.944531
chr4	186950772	186951551	0.318515	2.04434	2.6822	29336	29725	-	-29725	LOC442122	3512	0	no	NA	0	no	NA	2.55436	4.91604	0.944531
chr1	192982115	192982668	0.637031	3.45734	2.44023	614	890	-	-890	UCHL5	2349	0.77	up	0.0099	-0.27	down	0.4	1.12201	2.16055	0.945313
chr1	70379694	70380128	0.350367	1.0823	1.62716	4877	5094	+	5094	PIN1P1	996	-0.13	down	0.78	0.2	up	0.428	0.763922	1.47168	0.945967
chrx	11488279	11488776	0.127406	1.02217	3.00413	999999999	999999999	?	1									0.811667	1.56562	0.947771
chr2	74428709	74429118	0.159258	0.992107	2.63913	2954	3158	-	-3158	MTHFD2	483	-1.42	down	2.07e-32	-1.35	down	2.84e-33	0.453579	0.876746	0.950805
chr2	85442686	85443051	0.318515	1.53326	2.26716	1940	2122	-	-2122	TCF7L1	548	0.4	up	0.496	0.95	up	0.0307	1.81432	3.50698	0.950805
chr6	112043151	112043884	0.350367	2.79594	2.99639	1886	2253	-	-2253	FYN	2072	0.9	up	1.05e-51	0.4	up	1.53e-06	1.90981	3.69486	0.952093
chr20	39636992	39637351	0.159258	1.11236	2.80419	15768	15948	+	15948	LOC100128988	996	-1.42	down	0.759	1.49	up	0.675	1.50397	2.91205	0.953257
chr2	19340370	19341172	0.191109	1.86396	3.2859	95748	96149	-	-96149	FLJ41481	626	-0.6	down	0.849	-0.33	down	0.909	2.50662	4.85341	0.953257
chr1	24616338	24616847	0.159258	1.32281	3.05417	3630	3885	+	3885	ENSG00000232298	2339	0	no	NA	0	no	NA	1.55172	3.00598	0.953972
chr18	43102420	43102875	0.605179	1.56332	1.36918	18630	18858	-	-18858	FLJ44087	3182	10000	up	1	-1.07	down	1	2.6976	5.22916	0.954903
chr16	66070500	66071429	0.605179	2.61555	2.11168	172812	173277	-	-173277	AK095129	2673	0	no	NA	10000	up	0.362	1.69495	3.2878	0.955876
chr16	29868213	29869063	0.41407	3.66779	3.14696	615	1040	+	1040	CDIPT	1874	0.15	up	0.0409	0.25	up	0.0045	1.14588	2.22318	0.956162
chr5	77994338	77994651	0.41407	0.931979	1.17042	9906	10063	+	10063	ENSG00000254170	793	0.03	up	0.949	-0.05	down	1	1.19363	2.31711	0.956975
chr14	55568835	55569364	0.318515	1.32281	2.05417	20408	20673	+	20673	LGALS3	1233	-0.2	down	0.0122	-0.4	down	1.18e-06	2.435	4.72816	0.957357
chr3	99224703	99225174	0.0955546	1.02217	3.41917	350	586	-	-586	ENSG00000243296	458	-10000	down	0.639	10000	up	1	1.83819	3.56961	0.957481
chr12	24215792	24216126	0.477773	1.53326	1.6822	88043	88210	-	-88210	AK093833	2119	0	no	NA	10000	up	1	0.692304	1.34643	0.959661
chr5	55705201	55705966	0.477773	1.86396	1.96397	27300	27682	-	-27682	ENSG00000250787	295	-0.1	down	0.873	1.57	up	0.61	0.74005	1.44037	0.960743
chr20	32497028	32497699	0.700734	1.68358	1.26459	2430	2765	+	2765	dJ1125A11,2	725	0.23	up	1	10000	up	0.53	2.36338	4.60291	0.961693
chr3	157017898	157018416	0.445922	1.23262	1.46686	13098	13357	+	13357	VEPH1	1986	-0.38	down	0.213	-0.42	down	0.129	2.41113	4.69685	0.961985
chr2	109941248	109941926	0.350367	2.64562	2.91667	18290	18629	+	18629	LOC729164	1279	0	no	NA	0	no	NA	2.05304	4.00798	0.965113
chr4	126243262	126243576	0.286664	1.44306	2.3317	71515	71672	+	71672	FAT4	9669	0.49	up	1.64e-10	0.52	up	1.08e-07	1.69495	3.31911	0.969551
chr11	10512301	10512901	0.509625	1.71364	1.74956	2013	2313	+	2313	AMPD3	531	1.44	up	0.00889	0.55	up	0.587	2.64986	5.19785	0.972001
chr2	12596431	12596915	0.191109	1.32281	2.79114	104476	104718	+	104718	LOC100506457	578	0	no	NA	0	no	NA	1.05039	2.06661	0.97634
chr15	70722506	70722806	0.350367	1.53326	2.12966	3647	3797	-	-3797	LOC283674	1574	10000	up	1	0	no	NA	0.286471	0.563622	0.97634
chr16	11229284	11229678	0.254812	0.962043	1.91667	9083	9280	-	-9280	CLEC16A	2922	0.1	up	0.656	0.31	up	0.0849	1.52784	3.00598	0.97634
chrx	135137763	135138302	0.254812	1.20255	2.23859	999999999	999999999	?	1									1.52784	3.00598	0.97634
chr14	76114619	76115114	0.254812	1.59338	2.64459	106	354	-	-354	FLVCR2	2772	2.63	up	6.89e-52	0.83	up	0.00614	1.28912	2.5363	0.97634
chr2	101741337	101741959	0.350367	1.50319	2.10109	8327	8638	-	-8638	AK130116	936	-10000	down	0.639	0	no	NA	1.62333	3.19386	0.97634
chr7	117222171	117222861	0.382219	2.10447	2.46099	3400	3745	+	3745	ENSG00000234001	210	0	no	NA	0	no	NA	0.525196	1.03331	0.97634
chr1	180499515	180500171	0.350367	3.03645	3.11545	27426	27754	-	-27754	ACBD6	1670	-0.04	down	0.824	-0.15	down	0.447	1.28912	2.5363	0.97634
chr1	62071970	62072751	0.605179	2.22472	1.87819	47070	47461	+	47461	ENSG00000223920	754	0.91	up	0.829	-0.07	down	1	2.98407	5.88672	0.980182
chr10	63752314	63753044	0.637031	3.33709	2.38915	38200	38565	-	-38565	AK025011	2778	-0.42	down	1	10000	up	1	2.22015	4.38373	0.981502
chr11	91715228	91715528	0.605179	1.26268	1.06106	32028	32178	-	-32178	ENSG00000254961	304	0	no	NA	0	no	NA	1.7427	3.44436	0.982913
chr3	112323199	112323874	0.191109	1.80383	3.23859	-214	123	-	-123	CCDC80	3737	-0.48	down	1.51e-16	-0.44	down	3.5e-07	1.2175	2.41105	0.985739
chr11	3926655	3926976	0.573328	1.0823	0.916666	1962	2123	-	-2123	STIM1	583	0.04	up	0.973	0.12	up	0.676	2.33951	4.63423	0.986121
chr8	76030501	76030986	0.382219	1.35287	1.82356	83708	83951	-	-83951	CRISPLD1	4329	-1.48	down	1.64e-39	-0.56	down	0.000393	1.02652	2.0353	0.987481
chr4	52797413	52798015	0.445922	1.77377	1.99195	14410	14711	-	-14711	DCUN1D4	4265	0.35	up	5.13e-05	0.22	up	0.0389	1.33686	2.66155	0.993414
chr9	12923368	12924201	0.477773	2.31492	2.27656	4476	4893	+	4893	AK025387	1846	0	no	NA	-1.15	down	1	2.79309	5.5736	0.996746
chr11	10408845	10409301	0.573328	2.22472	1.95619	5848	6076	-	-6076	AMPD3	256	2.25	up	0.568	0	no	NA	3.29441	6.57559	0.997099
chr16	73019090	73019738	0.382219	1.56332	2.03214	25967	26291	+	26291	LOC100506152	574	0	no	NA	0	no	NA	2.64986	5.29179	0.997841
chr22	43329592	43330189	0.637031	1.71364	1.42763	11690	11989	+	11989	PACSIN2/ARFGAP3	622	-0.05	down	0.827	0.11	up	0.661	3.15118	6.29378	0.998035
chr12	13288550	13289177	0.509625	1.56332	1.61711	31932	32245	-	-32245	GSG1	2055	0.37	up	0.824	1.93	up	0.673	2.60211	5.19785	0.998233

## Sheet: PLZF peaks (H3K27Ac loss)
PLZF Peak position						Mapped nearest transcript						Expression from RNA seq						Histone mark by ChIP-seq
												Expression during Osteogenic commitment			Expression changes after PLZF knock down
Chromosome	Start	End	PLZF_d0	PLZF_d10	log2(PLZF_d10/d0)	BorderDist:From PLZF Peak to nearset transcript	CenterDist:From PLZF Peak_to nearest transcript	Direction to nearest transcript	Rel. position of nearest transcript	Symbol	Transcript length	log2FC(d10/d0)	Regulation(d10/d0)	adj. p-value(d10/d0)	log2FC(PLZFkd d2/d0)	Regulation(PLZFkd d2/d0)	adj. p-value (PLZFkd d2/d0)	K27Ac_d0 (naive)	K27Ac_d10	log2FC(K27Ac_d10/d0)
chr2	5906076	5906765	0.509625	2.46524	2.27422	35602	35946	-	-35946	ENSG00000236106	1746	-10000	down	0.382	-2.2	down	0.586	3.27054	0.500997	-2.70665
chr11	115493714	115494176	0.254812	1.11236	2.12612	35710	35941	+	35941	AK124988	2250	0	no	NA	0	no	NA	2.0053	0.313123	-2.67901
chr7	94249972	94250434	0.286664	1.20255	2.06867	1856	2087	-	-2087	SGCE	815	0.06	up	0.759	0.45	up	2.29e-05	1.16976	0.219186	-2.41598
chr12	102250750	102251320	0.222961	1.47313	2.72402	19785	20070	+	20070	DRAM1	3543	-1.22	down	2.51e-119	-0.16	down	0.175	3.12731	0.688872	-2.18261
chr3	189490669	189491289	0.41407	1.98421	2.26062	16160	16470	+	16470	TP63	4679	-1.67	down	0.000211	-1.99	down	0.000347	3.27054	0.876746	-1.8993
chr2	179621406	179622140	0.668883	1.95415	1.54672	1688	2055	+	2055	TTN/CCDC141	436	0	no	NA	0	no	NA	0.859412	0.250499	-1.77855
chr2	214883806	214884429	0.318515	3.1567	3.30898	95220	95531	-	-95531	SPAG16	556	10000	up	0.249	10000	up	0.752	0.74005	0.219186	-1.75546
chr11	132318527	132318851	0.509625	1.14243	1.16459	28440	28602	-	-28602	OPCML	1580	-10000	down	1.03e-24	-2.77	down	1.43e-15	1.98142	0.657559	-1.59134
chr11	84612951	84613483	0.477773	1.38294	1.53334	20698	20964	+	20964	DLG2	539	0	no	NA	0	no	NA	0.83554	0.281811	-1.56798
chr10	64675899	64676409	0.382219	3.51747	3.20207	3251	3506	+	3506	EGR2	687	-1.75	down	0.211	-1.1	down	0.495	1.33686	0.469685	-1.50909
chr4	102739531	102739926	0.222961	1.26268	2.50163	4494	4692	-	-4692	BANK1	3088	1.03	up	6.03e-05	0.53	up	0.343	0.883285	0.313123	-1.49615
chr2	71763483	71764063	0.222961	2.28485	3.35724	22494	22784	-	-22784	DYSF	5643	-1.19	down	6.93e-14	-0.74	down	2.04e-05	3.24667	1.15856	-1.48663
chr5	9479411	9479880	0.350367	1.47313	2.07194	31564	31799	+	31799	ENSG00000251370	1679	0	no	NA	0	no	NA	2.36338	0.845433	-1.48309
chr15	88320079	88320526	0.509625	1.26268	1.30898	82456	82680	+	82680	NTRK3	19984	-4.9	down	1.3e-55	0.17	up	0.492	1.71882	0.657559	-1.38623
chr6	39521428	39521985	0.41407	1.32281	1.67566	-160	119	-	-119	ENSG00000231276	1133	0.44	up	0.885	1.28	up	0.673	1.05039	0.40706	-1.36761
chr5	172192280	172192846	0.668883	1.98421	1.56874	2019	2302	-	-2302	ENSG00000213386	738	0.52	up	0.729	0.57	up	0.838	3.00794	1.25249	-1.26397
chr17	8382857	8383355	0.509625	1.29275	1.34293	587	836	+	836	NDEL1	1237	0.06	up	0.609	0.25	up	0.0114	1.57559	0.657559	-1.2607
chr3	184504067	184504621	0.350367	2.07441	2.56576	13124	13401	-	-13401	ENSG00000229433	2591	0	no	NA	0	no	NA	4.36868	1.84743	-1.24168
chr12	48275500	48276015	0.382219	1.29275	1.75797	416	674	+	674	ENSG00000205537	1287	-10000	down	0.214	10000	up	1	2.33951	1.00199	-1.22333
chr14	99423431	99423929	0.159258	1.20255	2.91667	15206	15455	+	15455	LOC653881	390	0.14	up	0.0683	-0.04	down	0.874	1.00265	0.438373	-1.19358
chr21	37152007	37152592	0.41407	1.89402	2.19351	46768	47060	-	-47060	ENSG00000230794	349	0	no	NA	0	no	NA	4.94162	2.16055	-1.19358
chr5	55322641	55323157	0.159258	1.26268	2.98706	23170	23428	-	-23428	FLJ31104	2289	0.44	up	1	-10000	down	0.221	1.55172	0.688872	-1.17156
chr5	57706142	57706760	0.159258	1.53326	3.26716	32117	32426	-	-32426	AK022205	1682	10000	up	1	0	no	NA	1.33686	0.594935	-1.16805
chr5	38464077	38464804	0.350367	3.60766	3.36413	-314	50	+	50	EGFLAM	3071	-1	down	0.086	-0.34	down	0.695	3.9151	1.75349	-1.15882
chr7	144228249	144228762	0.41407	1.32281	1.67566	77612	77868	-	-77868	TPK1	468	-0.14	down	0.943	-0.3	down	0.53	0.405834	0.187874	-1.11112
chr2	210360544	210361267	0.318515	2.1646	2.76466	71762	72124	-	-72124	MAP2	2241	2.14	up	8.78e-10	2.21	up	3.32e-07	1.95755	0.908058	-1.10819
chr4	165125369	165125997	0.350367	1.95415	2.4796	6506	6820	-	-6820	ANP32C	705	-1	down	0.0668	-0.29	down	0.673	1.81432	0.845433	-1.10166
chr12	77277540	77278107	0.222961	1.26268	2.50163	4742	5025	-	-5025	CSRP2	901	-0.51	down	2.28e-06	-0.12	down	0.541	0.668432	0.313123	-1.09405
chr9	127728071	127728533	0.0637031	1.17249	4.20207	2043	2274	+	2274	ENSG00000177736	562	0.88	up	0.441	-0.5	down	0.738	0.525196	0.250499	-1.06805
chr5	178702734	178703195	0.573328	1.17249	1.03214	69236	69466	+	69466	ADAMTS2	1738	0.03	up	0.686	0.43	up	1.54e-09	11.3395	5.47966	-1.04919
chr21	43517969	43518456	0.127406	1.20255	3.23859	3788	4032	+	4032	C21orf128	2141	-1.48	down	0.627	0.68	up	1	3.29441	1.59693	-1.04472
chr17	69408848	69409410	0.318515	1.89402	2.57202	73776	74057	-	-74057	FLJ40176	195	0	no	NA	0	no	NA	2.84084	1.37774	-1.04401
chr4	188400071	188400551	0.445922	2.25479	2.33813	34619	34859	-	-34859	ENSG00000251643	1224	-0.24	down	1	1.05	up	0.397	5.25196	2.59892	-1.01494
chr2	235330870	235331297	0.191109	0.931979	2.2859	15422	15636	+	15636	ENSG00000228162	774	0	no	NA	0	no	NA	3.15118	1.56562	-1.00916
chr8	118751191	118751935	0.477773	4.59977	3.26716	54794	55166	+	55166	EXT1	8270	-1.07	down	5.29e-98	-0.62	down	9.39e-20	1.38461	0.688872	-1.00717
