# Supplementary material for: PLZF targets developmental enhancers for activation during osteogenic differentiation of human mesenchymal stem cells
Source: eLife. 2019 Jan 23;8:e40364. doi: 10.7554/eLife.40364 (PMC6344081; doi:10.7554/eLife.40364)
Supplement: Supplementary file 6. [file elife-40364-supp6.xlsx]

## Sheet: PLZF_d10_peaks_log2_FC_1_mid_10
chr10:100074404-100074582
chr10:101548358-101548460
chr10:104533606-104534005
chr10:104562998-104563277
chr10:105409078-105409369
chr10:111834173-111834352
chr10:112169656-112169922
chr10:112170161-112170538
chr10:112185759-112186089
chr10:112186754-112186909
chr10:123283349-123283529
chr10:124254349-124254758
chr10:126028198-126028562
chr10:126029584-126030073
chr10:17044035-17044524
chr10:17045086-17045410
chr10:29924706-29925406
chr10:30092989-30093361
chr10:31364412-31364707
chr10:33411139-33411539
chr10:33562254-33562552
chr10:3510310-3510716
chr10:3511181-3511689
chr10:3542742-3543014
chr10:44289212-44289448
chr10:44363607-44363971
chr10:4705159-4705783
chr10:63752119-63752912
chr10:63753079-63753613
chr10:63842469-63842743
chr10:64342532-64342939
chr10:70821151-70821852
chr10:73620184-73620641
chr10:75665411-75665653
chr10:75666465-75666800
chr10:75725888-75726135
chr10:80015034-80015301
chr10:80015725-80016226
chr10:81159335-81159579
chr10:82257950-82258092
chr10:82258642-82258780
chr10:93109121-93109290
chr1:109913179-109913623
chr11:10003812-10004242
chr11:10060683-10060760
chr1:110363861-110364229
chr11:10409017-10409473
chr11:111195136-111195460
chr11:111195850-111196227
chr11:114030720-114031134
chr11:114031661-114032121
chr11:114033536-114034161
chr11:114049941-114050567
chr1:112276731-112276883
chr11:128078462-128078679
chr11:128352415-128352744
chr11:128366966-128367159
chr11:128367325-128367539
chr11:129013172-129013631
chr11:131934936-131935322
chr11:131942118-131942474
chr11:14443887-14444060
chr11:18404883-18405218
chr11:18405328-18405801
chr1:12193120-12193399
chr11:26969207-26969439
chr11:27255766-27256168
chr11:2799950-2800256
chr11:33711808-33712191
chr1:14467397-14467540
chr11:45110922-45111223
chr1:150585815-150586394
chr1:151945068-151945221
chr1:151968368-151968560
chr1:154391539-154392211
chr1:154392646-154393050
chr1:157980631-157980890
chr1:16125579-16125747
chr11:61771922-61772331
chr1:161973588-161973892
chr1:16212759-16213091
chr11:6240600-6240982
chr11:65187297-65188198
chr11:66659730-66659912
chr11:66738286-66738892
chr11:67121988-67122388
chr1:171110631-171110996
chr1:171111810-171112100
chr1:172327070-172327187
chr1:172327558-172328156
chr1:172715484-172715760
chr11:78512207-78512629
chr1:18200796-18200931
chr1:183132366-183132749
chr1:183133608-183133779
chr1:183149947-183150219
chr1:183239968-183240242
chr1:183248987-183249454
chr1:183811794-183811833
chr1:184836042-184836526
chr11:86229748-86229843
chr11:86451588-86451883
chr11:86454484-86454767
chr11:86454778-86455149
chr11:9587499-9588027
chr11:9588297-9588534
chr1:19762527-19762798
chr11:9786985-9787566
chr11:9787824-9788205
chr1:198625518-198626374
chr1:201431088-201431253
chr1:201682596-201682901
chr1:205144631-205144860
chr1:208339104-208339123
chr1:208358733-208359022
chr1:208377298-208378003
chr12:102250819-102251404
chr12:102251509-102251983
chr12:108699402-108699607
chr12:108700100-108700298
chr12:108761286-108761499
chr12:109227089-109227462
chr12:109900309-109900503
chr12:109900993-109901418
chr1:211210840-211210858
chr12:113660919-113661318
chr12:116821073-116821333
chr12:117032027-117032578
chr12:123930588-123930862
chr12:125003619-125003834
chr12:125258641-125259012
chr12:125259292-125259624
chr12:125565000-125565015
chr12:13251023-13251431
chr12:13251588-13252400
chr12:13252845-13253278
chr1:21348947-21349299
chr1:21349725-21349786
chr1:21475659-21476054
chr1:218550674-218551089
chr12:2374154-2374447
chr12:2448491-2448599
chr1:234754264-234754665
chr1:234858843-234859287
chr1:235106929-235107153
chr1:235133014-235133422
chr1:235134086-235134438
chr1:235146978-235147112
chr1:235246558-235246857
chr12:46949340-46949533
chr12:46949913-46950236
chr12:46956686-46956942
chr12:52279748-52280043
chr12:52674043-52674518
chr12:52674655-52675081
chr12:52888449-52888608
chr12:52889322-52889458
chr12:56240862-56241188
chr12:57529958-57530234
chr12:58923778-58923975
chr12:60093413-60093661
chr1:26022319-26022793
chr12:63096065-63096306
chr12:63097406-63097648
chr12:63124974-63125146
chr12:64312639-64312950
chr12:6444583-6445131
chr12:6445143-6445640
chr12:64574864-64574988
chr12:65930655-65931175
chr12:66025227-66025796
chr12:66042799-66043321
chr12:66285844-66286273
chr12:66286698-66286979
chr12:680187-680377
chr12:8771795-8772138
chr12:89557744-89558051
chr12:89727563-89727887
chr12:90127113-90127954
chr12:92471870-92472505
chr12:96631530-96631765
chr13:111013776-111014136
chr13:21653965-21654176
chr13:24365850-24365860
chr13:29328831-29329051
chr1:33564918-33565286
chr13:40811033-40811154
chr13:46929409-46929462
chr13:51103280-51103738
chr13:52218212-52218391
chr13:52218923-52219366
chr13:52220633-52220708
chr14:100497913-100498157
chr14:30663023-30663420
chr14:30663968-30664325
chr14:32979007-32979394
chr14:35120187-35120582
chr14:50526790-50527127
chr14:50527611-50528257
chr14:55569033-55569319
chr14:55569733-55570176
chr14:64109095-64109326
chr14:68408350-68408505
chr14:68925660-68925982
chr14:69014304-69014714
chr14:69014972-69015327
chr14:69149155-69149350
chr14:75038441-75039020
chr14:75086409-75086922
chr14:75087327-75087770
chr14:75447372-75447747
chr14:77384574-77384777
chr14:77384980-77385465
chr14:77386302-77386621
chr14:81867255-81867616
chr14:81867886-81868104
chr14:81868469-81868528
chr14:89881748-89882141
chr14:99423594-99423887
chr15:101667290-101667533
chr15:101667775-101667985
chr15:38421726-38421911
chr15:39006951-39007336
chr15:39420923-39421276
chr15:40385571-40385715
chr15:45933530-45934014
chr15:50347446-50348347
chr1:55400798-55400903
chr15:58733027-58733372
chr1:55894779-55895033
chr1:55909250-55909597
chr15:59587320-59587393
chr15:61520020-61520614
chr1:56184456-56184884
chr15:62896766-62896914
chr15:63539312-63539664
chr15:68900803-68901132
chr15:70766954-70767165
chr15:70767457-70767783
chr15:70779021-70779387
chr15:70785060-70785587
chr15:75959061-75959441
chr15:83956370-83956763
chr15:85455479-85455863
chr15:85458286-85458507
chr15:86166895-86167159
chr15:89595180-89595429
chr15:90944087-90944636
chr1:59221049-59221462
chr15:93347056-93347810
chr16:11198828-11199160
chr1:61549054-61549253
chr16:15670640-15671032
chr16:15684514-15685137
chr16:17499199-17499488
chr1:62072423-62072573
chr16:27248798-27249418
chr16:27249665-27249878
chr16:29954900-29955228
chr1:64127998-64128504
chr16:53124874-53125001
chr16:53125869-53126178
chr16:56640479-56640669
chr16:56641054-56641530
chr16:66906996-66907469
chr1:66736293-66736539
chr1:67029191-67029437
chr1:67029939-67030347
chr16:70725776-70726100
chr16:73023566-73023933
chr16:84866015-84866457
chr16:84866899-84867167
chr16:88337697-88337985
chr16:88338212-88338634
chr16:88365536-88366092
chr16:88366840-88367234
chr17:14641383-14641624
chr17:14641682-14642082
chr17:15862469-15862773
chr17:17838975-17839310
chr17:38488015-38488253
chr17:38677736-38678132
chr17:38705273-38706158
chr17:38707495-38707811
chr17:38708057-38709216
chr17:39113005-39113367
chr17:4107837-4108131
chr17:48716691-48717083
chr17:55969951-55970070
chr17:55970352-55970806
chr17:56025910-56026308
chr17:57500537-57500993
chr17:59329573-59329874
chr17:62675748-62676312
chr17:64463185-64463416
chr17:66374219-66374806
chr17:66374808-66375131
chr17:66379549-66379922
chr17:66380161-66380700
chr17:6655808-6656203
chr17:6656419-6656747
chr17:66576283-66577056
chr17:66694330-66694724
chr17:67729924-67730199
chr17:71286924-71287020
chr17:71287548-71287861
chr17:73689850-73690283
chr17:76337607-76338208
chr17:76338337-76338836
chr17:76412850-76413399
chr17:76875667-76876103
chr17:81150899-81151424
chr17:81151661-81152140
chr1:8107848-8108157
chr1:8121436-8121582
chr18:2515543-2515690
chr18:2516331-2516615
chr1:8263853-8264184
chr1:8264458-8264788
chr1:8272041-8272390
chr18:2856906-2857063
chr18:33057648-33057699
chr18:51675484-51675804
chr18:52409898-52410241
chr1:85795855-85796291
chr1:85796595-85797055
chr18:59400195-59400366
chr18:59400782-59401038
chr1:86077140-86077408
chr1:86077578-86077925
chr1:86078461-86078819
chr18:68088825-68088985
chr18:68089361-68089784
chr1:87253936-87254322
chr18:74171783-74172228
chr18:8140065-8140370
chr18:8141224-8141378
chr1:8964053-8964236
chr19:18128099-18128520
chr1:92116335-92116643
chr19:39894353-39894945
chr19:4067781-4068111
chr19:42772804-42773312
chr19:46011701-46012269
chr19:4870294-4870493
chr1:95155573-95156005
chr19:56060798-56061018
chr19:6273754-6274259
chr1:96827006-96827340
chr1:96828119-96828533
chr1:98366677-98366793
chr19:8426850-8427217
chr19:8488334-8488459
chr19:8488784-8489136
chr20:10585324-10585599
chr20:17824958-17825344
chr20:30300504-30300973
chr20:30301047-30301377
chr20:33896147-33896435
chr20:34356129-34356371
chr20:35572677-35573004
chr20:39878072-39878223
chr20:45962816-45963214
chr20:48200728-48200848
chr20:48201281-48201539
chr20:48383666-48383949
chr20:48384741-48385230
chr20:48385312-48385495
chr20:48921857-48922230
chr20:48922474-48922671
chr20:48924890-48925591
chr20:49596851-49597164
chr20:49982609-49983533
chr20:9390788-9390859
chr2:102081384-102081611
chr2:102666464-102666883
chr2:106022630-106022770
chr2:106026144-106026496
chr2:109934621-109934818
chr2:112375521-112375561
chr2:112376562-112376898
chr2:112417011-112417329
chr2:112420062-112420336
chr2:113450039-113450435
chr21:16368229-16368687
chr2:121299175-121299329
chr2:121955043-121955176
chr2:12460124-12460450
chr2:12596433-12596805
chr2:128266210-128266439
chr21:28962741-28962988
chr21:29817449-29817753
chr21:30631059-30631204
chr2:135020271-135020560
chr21:36936186-36936505
chr21:39654732-39655403
chr21:39656161-39656338
chr21:39661705-39662059
chr21:39713531-39713914
chr21:43518001-43518239
chr2:145214152-145214623
chr2:145756118-145756307
chr21:46461202-46461645
chr21:46470710-46471152
chr2:146509165-146509664
chr2:146510109-146510425
chr21:46783934-46784395
chr21:47469357-47469652
chr2:15309828-15310293
chr2:153450651-153451105
chr2:158030373-158030519
chr2:161232354-161232597
chr2:161244338-161244737
chr2:168994093-168994243
chr2:177864233-177864340
chr2:19340591-19340734
chr2:197069769-197070011
chr2:198070396-198070947
chr2:204547424-204547617
chr2:204548440-204549024
chr2:204550155-204550270
chr2:204668913-204669218
chr2:208027980-208028625
chr2:208028732-208029438
chr2:208378687-208378932
chr22:19279963-19280298
chr2:224330555-224330880
chr2:228232228-228232344
chr22:28261904-28262359
chr22:28262860-28262973
chr22:30591285-30591521
chr22:30601535-30602099
chr2:232505425-232505799
chr2:235330824-235331180
chr2:235331545-235331768
chr22:35772921-35773272
chr22:35773875-35773984
chr2:238116338-238116655
chr2:238131951-238132217
chr22:38148564-38148886
chr2:238188101-238188190
chr2:238188791-238189175
chr22:39704707-39705214
chr2:240143817-240143953
chr2:240144176-240144295
chr2:240144687-240145031
chr22:40357456-40357744
chr22:44756999-44757252
chr22:44757371-44757617
chr2:33295461-33295712
chr2:36665586-36666219
chr2:37858321-37858709
chr2:38405386-38405542
chr2:42193606-42193918
chr2:42368874-42369229
chr2:43063239-43063414
chr2:43186488-43186945
chr2:43496273-43496611
chr2:43692800-43693176
chr2:45405025-45405418
chr2:46294979-46295300
chr2:46542401-46542637
chr2:47039745-47040099
chr2:47075244-47075442
chr2:47194379-47194775
chr2:47195176-47195614
chr2:47284732-47284905
chr2:47285421-47285805
chr2:69469857-69470021
chr2:74793766-74794164
chr2:85442728-85442944
chr2:85969500-85969917
chr2:86299445-86299644
chr2:9427801-9428115
chr2:9428594-9428712
chr2:98485830-98486136
chr3:101658617-101658834
chr3:101901132-101901377
chr3:105625722-105626117
chr3:105626736-105626952
chr3:106926972-106927298
chr3:111521164-111521550
chr3:11187629-11187920
chr3:112348564-112348626
chr3:112372486-112372667
chr3:112390838-112391135
chr3:121713958-121714176
chr3:121714355-121714445
chr3:12234951-12235397
chr3:12235782-12236012
chr3:123372011-123372488
chr3:124531464-124532111
chr3:124770854-124771405
chr3:127487223-127487760
chr3:131854898-131855187
chr3:134050159-134050571
chr3:134051149-134051359
chr3:134182898-134183261
chr3:141995622-141995984
chr3:146031799-146032049
chr3:147016506-147016766
chr3:149104739-149105065
chr3:151975130-151975682
chr3:151976173-151976628
chr3:151977338-151977483
chr3:152313972-152314194
chr3:16101834-16102183
chr3:16102393-16102705
chr3:171592038-171592451
chr3:171847438-171848726
chr3:171870963-171871593
chr3:174157357-174157932
chr3:177168818-177169119
chr3:177170399-177170552
chr3:183087572-183087718
chr3:183088664-183088916
chr3:183089068-183089238
chr3:184503800-184503841
chr3:184504548-184504615
chr3:185374091-185374577
chr3:187673173-187673416
chr3:190251387-190251779
chr3:190252374-190252607
chr3:30327576-30327949
chr3:30700179-30700500
chr3:32463504-32463726
chr3:51377903-51378233
chr3:55194265-55194440
chr3:55194450-55194988
chr3:58038147-58038335
chr3:71222111-71222440
chr3:72395827-72396075
chr3:8502863-8503141
chr3:99224992-99225368
chr3:99227163-99227322
chr4:114366444-114366711
chr4:114367129-114367387
chr4:115193554-115193741
chr4:122610538-122611647
chr4:122611926-122612330
chr4:124981401-124981797
chr4:129438976-129439122
chr4:138585739-138585945
chr4:13894956-13895300
chr4:154597696-154597910
chr4:154598070-154598582
chr4:159731152-159732543
chr4:159732931-159733171
chr4:169555491-169556032
chr4:177715411-177715680
chr4:188400076-188400296
chr4:22669102-22669338
chr4:26017123-26017402
chr4:67430351-67431255
chr4:67431681-67431779
chr4:74757619-74757931
chr4:74783021-74783195
chr4:74974477-74974715
chr4:74974850-74975280
chr4:74975298-74975961
chr4:77674311-77674688
chr4:7830043-7830393
chr4:82527950-82528304
chr4:82529133-82529425
chr5:10551479-10551871
chr5:106724874-106725113
chr5:106725486-106725757
chr5:124178131-124178310
chr5:133775971-133776293
chr5:133801466-133801754
chr5:133802349-133802592
chr5:135342387-135342803
chr5:142381384-142382030
chr5:142623562-142623962
chr5:142624650-142624850
chr5:148515213-148515594
chr5:150163031-150163501
chr5:151119916-151120243
chr5:15451801-15451916
chr5:172192263-172193766
chr5:172198749-172199959
chr5:172200337-172200842
chr5:172202171-172203025
chr5:172203413-172203849
chr5:172221140-172221536
chr5:172222248-172222806
chr5:172881373-172881649
chr5:172882283-172882785
chr5:17302170-17302536
chr5:17302742-17303327
chr5:176972522-176972758
chr5:176973275-176973657
chr5:32028303-32028410
chr5:32582779-32582965
chr5:32760271-32760413
chr5:35924372-35924674
chr5:36657665-36658163
chr5:39760848-39761179
chr5:53597184-53597322
chr5:57706389-57706561
chr5:71748206-71748633
chr5:76086514-76086772
chr5:76086859-76087104
chr5:81148608-81149026
chr6:106047524-106047990
chr6:106048262-106048533
chr6:106049296-106049799
chr6:113966016-113966399
chr6:113966975-113967088
chr6:11609469-11609947
chr6:122253904-122254092
chr6:129455076-129455285
chr6:130030425-130030727
chr6:133874375-133874708
chr6:135231583-135231692
chr6:138049891-138050457
chr6:139918701-139919066
chr6:147234581-147234754
chr6:147235088-147235549
chr6:147235645-147236230
chr6:148822303-148822649
chr6:158184460-158184689
chr6:158185393-158186221
chr6:158439513-158439767
chr6:158440159-158440546
chr6:158640222-158640658
chr6:15901378-15901471
chr6:15902018-15902163
chr6:166970262-166970784
chr6:17932767-17932988
chr6:25174209-25174610
chr6:30748515-30748873
chr6:3389811-3390490
chr6:3826272-3826513
chr6:39850347-39850811
chr6:42488672-42489031
chr6:4352111-4352211
chr6:4358823-4359231
chr6:44025238-44025386
chr6:44026121-44027353
chr6:44205272-44205504
chr6:44205807-44206020
chr6:52460126-52460529
chr6:53919215-53919239
chr6:57178706-57179008
chr6:68340064-68340094
chr6:74289769-74290568
chr6:74290752-74291151
chr6:75341134-75341498
chr6:86174491-86174911
chr6:89744158-89744669
chr6:89744998-89746016
chr6:90994449-90994671
chr6:90995736-90996093
chr6:91078844-91079184
chr7:100760673-100761017
chr7:100765253-100766084
chr7:115957025-115957120
chr7:115957232-115957778
chr7:115995232-115995555
chr7:127876972-127877440
chr7:130645057-130645459
chr7:134378159-134378392
chr7:137352437-137352725
chr7:139430911-139431484
chr7:139431881-139432226
chr7:147109889-147110169
chr7:22616365-22616571
chr7:22616988-22617783
chr7:22757674-22758207
chr7:32133021-32133498
chr7:34135793-34136189
chr7:46803788-46804144
chr7:47691174-47691510
chr7:65746929-65747210
chr7:7197591-7197789
chr7:73265870-73266203
chr7:73686776-73686884
chr7:73686940-73687240
chr7:80352083-80352704
chr7:80571600-80571811
chr7:95179507-95179842
chr7:95238124-95238400
chr7:99551289-99551506
chr8:104357065-104357412
chr8:116112760-116113320
chr8:119808728-119809168
chr8:121798029-121798317
chr8:124889263-124889525
chr8:128352367-128352670
chr8:128353206-128353555
chr8:128403573-128403875
chr8:128865187-128865467
chr8:129188825-129189407
chr8:130647498-130647834
chr8:19266409-19266742
chr8:23202733-23203217
chr8:23203813-23204244
chr8:23396383-23397127
chr8:26466209-26466513
chr8:26466894-26467238
chr8:37678678-37679141
chr8:37679848-37680132
chr8:38384926-38385302
chr8:38794203-38794537
chr8:38794582-38795442
chr8:38895649-38895937
chr8:65669426-65669620
chr8:67035997-67036639
chr8:67042054-67042413
chr8:69672075-69672426
chr8:69833238-69833706
chr8:69834272-69834684
chr8:97350195-97350563
chr9:103192373-103192745
chr9:110512153-110512586
chr9:110514044-110514454
chr9:112878723-112879133
chr9:112903621-112903940
chr9:114774761-114774976
chr9:114775716-114775991
chr9:114812315-114812544
chr9:114812842-114813221
chr9:118706424-118707025
chr9:124134922-124135274
chr9:133722867-133723250
chr9:134552911-134553181
chr9:136008698-136009031
chr9:136009131-136009458
chr9:136009735-136010292
chr9:137348030-137348540
chr9:16985936-16986021
chr9:21688773-21688952
chr9:22085335-22085732
chr9:26265141-26265461
chr9:27155069-27155179
chr9:5627107-5627559
chr9:89886706-89886836
chr9:91364331-91364616
chr9:96901972-96902054
