# Supplementary material for: PLZF targets developmental enhancers for activation during osteogenic differentiation of human mesenchymal stem cells
Source: eLife. 2019 Jan 23;8:e40364. doi: 10.7554/eLife.40364 (PMC6344081; doi:10.7554/eLife.40364)
Supplement: Supplementary file 7. [file elife-40364-supp7.xlsx]

## Sheet: PLZF_d10 peaks filtered - clust
Chromosome	Start	End	Strand	Pos reads	Neg reads	Apex	PLZF_d0	PLZF_d10	uctrlK27ac1	uctrlK27ac2	uctrlK27ac3	uctrlH3	dctrlK27ac1	dctrlK27ac2	dctrlK27ac3	dctrlH3	dsi57K27ac1	dsi57K27ac2	dsi57K27ac3	dsi57H3	Average	log2fd_uctrlK27ac1	log2fd_uctrlK27ac2	log2fd_uctrlK27ac3	log2fd_dctrlK27ac1	log2fd_dctrlK27ac2	log2fd_dctrlK27ac3	log2fd_dsi57K27ac1	log2fd_dsi57K27ac2	log2fd_dsi57K27ac3	av log2fd(dctrl)-log2fd(uctrl) K27ac	Cluster	Nearest gene	Acc#
chr7	73686812	73687430	+	39	2	73687214	0.254812	1.17249	4.43039	3.95111	3.60466	0.498603	1.84272	1.84071	1.81487	0.416746	2.16122	2.62627	2.28141	0.242091	2.72815	0.699508	0.534335	0.401938	-0.566084	-0.567658	-0.588061	-0.336076	-0.0549073	-0.257997	-1.11919	7	clip2	nm_003388	Loss
chr6	82639584	82640051	+	49	8	82639796	0.382219	1.65351	1.59654	2.13451	1.01106	0.308659	0.421194	0.699472	0.993855	0.416746	0.648367	0.645049	0.717015	0.79544	0.985229	0.696414	1.11537	0.0373409	-1.22597	-0.494193	0.0125768	-0.603648	-0.611049	-0.458456	-1.18557	7	fam46a	nm_017633	Loss
chr1	151945343	151945906	+	50	3	151945639	0.222961	1.68358	1.07766	1.31704	1.31878	0.569832	0.263246	0.736286	0.475322	0.486204	0.504285	0.552899	0.554057	0.518765	0.755508	0.512385	0.801778	0.803681	-1.52103	-0.0371811	-0.668542	-0.583206	-0.45043	-0.447413	-1.4482	7	s100a10	nm_002966	Loss
chr8	118681923	118682301	+	37	5	118682116	0.286664	1.38294	2.6742	2.86115	2.50568	0.284916	1.21093	1.25169	1.1667	0.347289	1.29673	1.52047	1.59699	0.449597	1.78717	0.581428	0.678918	0.487522	-0.561559	-0.513805	-0.615244	-0.462795	-0.233157	-0.162324	-1.14616	7	med30	nm_001282986	Loss
chr6	45593999	45594326	+	36	6	45594102	0.382219	1.59338	3.99134	5.35898	4.79156	0.332402	1.89537	2.90833	1.81487	0.324136	2.3053	3.08702	1.85772	0.276675	3.11228	0.358902	0.783988	0.622524	-0.715489	-0.0977798	-0.778107	-0.433013	-0.0117545	-0.744437	-1.11893	7	runx2	nm_001278478	Loss
chr5	76086478	76086992	+	35	3	76086773	0.222961	1.20255	3.79177	3.86028	4.26404	0.356145	1.94802	1.61983	1.42597	0.439899	2.41337	2.48805	2.05327	0.345844	2.65162	0.515997	0.541831	0.685347	-0.444865	-0.711034	-0.894936	-0.135829	-0.0918612	-0.368952	-1.26467	7	f2rl1	nm_005242	Loss
chr6	136043192	136043727	+	50	6	136043466	0.286664	1.71364	1.63645	1.63494	1.4067	0.166201	0.579142	0.368143	0.216055	0.347289	0.93653	1.24402	0.945156	0.103753	0.996349	0.715846	0.714518	0.497587	-0.782734	-1.43638	-2.20525	-0.0893253	0.320292	-0.076098	-2.11744	7	pde7b	nm_018945	Loss
chr2	46294868	46295286	+	47	7	46294990	0.286664	1.89402	5.54796	6.22187	6.28617	0.379888	2.63246	2.79789	3.84579	0.486204	4.17836	3.8703	4.2695	0.415012	4.40559	0.332623	0.498013	0.512846	-0.742922	-0.654997	-0.196056	-0.0763961	-0.186891	-0.045268	-0.979153	7	epas1	nm_001430	Loss
chr12	8771799	8772210	+	25	2	8772074	0.191109	0.931979	4.90935	4.63234	4.61572	0.308659	2.00067	2.3193	2.07413	0.347289	4.25041	4.65357	4.17172	0.345844	3.73636	0.393899	0.310109	0.304923	-0.901148	-0.687942	-0.849124	0.185968	0.316706	0.159011	-1.14905	7	aicda	nm_020661	Loss
chr21	37152007	37152592	+	53	7	37152301	0.41407	1.89402	4.07117	4.17819	4.22009	0.308659	1.68478	1.84071	2.20377	0.416746	3.85418	2.9488	3.55248	0.415012	3.17268	0.359738	0.397174	0.411568	-0.913147	-0.785438	-0.525733	0.280721	-0.105577	0.163124	-1.13093	7	mir802	nr_030414	Loss
chr17	64271695	64272173	+	41	4	64271944	0.254812	1.29275	2.79394	3.54238	2.24192	0.451117	1.47418	1.0308	1.20991	0.370441	1.72898	1.01365	1.36885	0.311259	1.82273	0.616196	0.958615	0.298632	-0.306192	-0.822339	-0.591203	-0.0761834	-0.846545	-0.413142	-1.19773	7	prkca	nm_002737	Loss
chr14	99423431	99423929	+	33	4	99423724	0.159258	1.20255	0.718441	0.681226	0.483551	0.522346	0.157948	0.220886	0.216055	0.532509	0.396224	0.322525	0.358507	0.380428	0.39504	0.862869	0.786134	0.291669	-1.32255	-0.8387	-0.870599	0.00431679	-0.292591	-0.139997	-1.65751	7	c14orf177	nm_182560	Loss
chr5	57706142	57706760	+	46	6	57706427	0.159258	1.53326	1.03775	0.999132	1.09898	0.379888	0.315895	0.147257	0.432111	0.463052	0.540306	0.506825	0.488874	0.449597	0.61857	0.746448	0.691739	0.829157	-0.969489	-2.0706	-0.517535	-0.19516	-0.28745	-0.339474	-1.94166	7	plk2	nm_001252226	Loss
chr2	145213995	145214639	+	104	8	145214344	0.254812	3.30702	1.55662	1.72577	1.05502	0.332402	0.631791	0.5154	0.604955	0.393594	0.90051	1.1058	1.5644	0.449597	1.07336	0.53628	0.685105	-0.0248661	-0.764619	-1.05837	-0.827238	-0.253325	0.0429508	0.543468	-1.28225	7	zeb2-as1	nr_040248	Loss
chr8	121792394	121792726	+	30	4	121792582	0.254812	1.20255	3.15316	3.95111	4.00029	0.213687	1.26358	1.87753	1.9445	0.463052	2.55745	2.7645	2.18364	0.345844	2.63286	0.260166	0.585628	0.603473	-1.05911	-0.487796	-0.437233	-0.0419269	0.0703857	-0.269899	-1.14447	7	sntb1	nm_021021	Loss
chr9	16964100	16964609	+	45	7	16964383	0.254812	1.47313	4.62995	3.76945	3.78049	0.403631	1.47418	1.95116	1.38275	0.439899	2.44939	2.5802	2.37919	0.345844	2.71075	0.772305	0.475663	0.479882	-0.878781	-0.474362	-0.971147	-0.146272	-0.0712111	-0.188225	-1.35071	7	bnc2	nm_017637	Loss
chr8	123208125	123208741	+	42	4	123208424	0.318515	1.38294	4.43039	3.67862	3.47278	0.071229	1.47418	1.36213	1.64202	0.277831	2.3053	2.5802	2.47696	0.276675	2.60251	0.767529	0.499263	0.416187	-0.819992	-0.93404	-0.66443	-0.174946	-0.0124215	-0.071332	-1.36715	7	has2	nm_005328	Loss
chr8	134587933	134588351	+	47	8	134588016	0.350367	1.62345	4.39047	5.31357	4.13217	0.284916	2.79041	1.95116	2.3334	0.324136	2.41337	3.27132	3.35693	0.138337	3.32809	0.399683	0.674987	0.312205	-0.254217	-0.770363	-0.512261	-0.463647	-0.0248199	0.0124504	-0.974572	7	st3gal1	nm_003033	Loss
chrx	151152653	151153248	+	40	3	151153002	0.286664	1.29275	0.518874	0.953717	1.23086	0.189944	0.315895	0.441771	0.432111	0.231526	0.576326	0.737199	0.977748	0.415012	0.687167	-0.405276	0.472901	0.840933	-1.12121	-0.63736	-0.669258	-0.253775	0.101395	0.508802	-1.11213	7	gabre	nm_004961	Loss
chr3	146521401	146521917	+	51	6	146521704	0.318515	1.59338	2.51454	2.08909	2.41776	0.403631	0.68444	1.06761	1.25312	0.277831	1.54888	1.4744	2.02068	0.276675	1.6745	0.586564	0.319145	0.529937	-1.29074	-0.649342	-0.418206	-0.11251	-0.183606	0.271107	-1.26464	7	plscr5	nm_001085420	Loss
chr6	30749448	30750076	+	47	7	30749718	0.286664	1.47313	9.49939	9.26468	9.01164	0.213687	3.58015	3.64461	3.67294	0.439899	4.71867	5.57507	4.82356	0.518765	5.97675	0.668474	0.632381	0.59243	-0.739341	-0.713594	-0.702424	-0.34098	-0.10037	-0.309263	-1.34955	7	ier3	nm_003897	Loss
chr3	184504067	184504621	+	68	6	184504319	0.350367	2.07441	6.2664	6.85768	6.15429	0.403631	1.89537	2.39293	2.24698	0.393594	2.98969	3.08702	3.42212	0.484181	3.92361	0.675456	0.805539	0.649411	-1.0497	-0.713404	-0.804196	-0.392184	-0.345966	-0.197292	-1.5659	7	rp11-329b9,1	nr_110043	Loss
chr11	27255555	27256183	+	39	6	27255866	0.318515	1.38294	8.50155	7.62974	7.73682	0.189944	1.94802	1.73027	1.25312	0.370441	2.70153	3.3174	2.93324	0.311259	4.19463	1.01918	0.863089	0.883197	-1.10653	-1.27755	-1.74302	-0.634768	-0.338493	-0.516048	-2.29752	7	ccdc34	nm_080654	Loss
chr22	27610141	27610738	+	42	4	27610488	0.350367	1.50319	6.82519	6.94851	6.15429	0.356145	1.36888	1.39894	1.5556	0.601967	1.47684	1.75085	1.43403	0.345844	3.21257	1.08714	1.11298	0.937865	-1.23073	-1.19939	-1.04626	-1.12122	-0.875674	-1.16365	-2.20479	7	rp1-90l6,2	nr_110540	Loss
chr2	238188727	238189325	+	52	8	238189054	0.286664	1.71364	9.18008	11.0813	7.60495	0.118715	3.15895	3.93913	4.49395	0.393594	5.00683	4.7918	3.97617	0.345844	5.91479	0.634179	0.905725	0.36261	-0.904881	-0.586451	-0.396343	-0.240429	-0.303762	-0.572947	-1.2634	7	col6a3	nm_004369	Loss
chr18	2515248	2515764	+	32	2	2515508	0.254812	1.0823	3.15316	3.26989	2.50568	0.308659	1.36888	0.846729	1.12349	0.370441	2.23326	2.16552	2.37919	0.484181	2.1162	0.575322	0.627766	0.243724	-0.628479	-1.3215	-0.91349	0.0776786	0.0332402	0.168993	-1.43676	7	mettl4	nm_022840	Loss
chr5	52658158	52658928	+	95	5	52658502	0.318515	2.85607	5.86727	6.04021	5.58282	0.166201	2.52716	2.577	3.06799	0.370441	3.53	3.36347	3.68285	0.242091	4.02653	0.543152	0.585061	0.471457	-0.672018	-0.643844	-0.392244	-0.18987	-0.259586	-0.128714	-1.10259	7	fst	nm_006350	Loss
chr11	47884643	47885384	+	83	13	47885036	0.254812	2.76587	1.51671	1.18079	0.923144	0.213687	0.473843	0.478586	0.561744	0.208373	0.432245	0.783274	0.651832	0.345844	0.778019	0.963067	0.601879	0.24675	-0.715395	-0.701027	-0.469892	-0.847957	0.00971261	-0.255305	-1.23267	7	nup160	nm_015231	Loss
chr9	127728071	127728533	+	36	4	127728282	0.0637031	1.17249	1.67636	1.08996	1.31878	0.142458	0.421194	0.368143	0.475322	0.370441	0.540306	0.783274	0.782198	0.207506	0.828393	1.01695	0.395891	0.670813	-0.975831	-1.17005	-0.80141	-0.616539	-0.0807981	-0.0827815	-1.67698	7	golga1	nm_002077	Loss
chr11	131934859	131935326	+	95	12	131935112	0.445922	3.06651	6.98484	7.62974	6.9016	0.166201	2.94836	3.05559	4.10505	0.185221	5.4751	6.17404	5.60575	0.276675	5.43112	0.362978	0.490384	0.345681	-0.881338	-0.8298	-0.403848	0.0116356	0.184966	0.0456588	-1.10468	7	ntm	nm_001144059	Loss
chr8	123179041	123179579	+	35	5	123179344	0.159258	1.20255	6.34623	6.53977	6.46201	0.284916	2.47451	2.65063	2.67909	0.532509	5.11489	4.4232	4.04136	0.311259	4.52574	0.487745	0.531086	0.513827	-0.871009	-0.77182	-0.756413	0.17655	-0.0330656	-0.163315	-1.31063	7	has2	nm_005328	Loss
chr22	30601351	30602154	+	64	4	30601732	0.254812	1.98421	7.78311	7.03934	8.39621	0.569832	2.00067	2.54019	3.1112	0.81034	3.31388	4.51535	3.68285	0.311259	4.7092	0.724865	0.579959	0.834257	-1.235	-0.890547	-0.598011	-0.506962	-0.0606452	-0.354659	-1.62088	7	lif	nm_002309	Loss
chr17	39113185	39113495	+	32	4	39113288	0.222961	1.413	5.78744	6.90309	5.53886	0.071229	3.3169	2.577	2.7223	0.347289	4.0703	4.7918	5.21465	0.449597	4.54693	0.348033	0.602351	0.284697	-0.455056	-0.819199	-0.740067	-0.159756	0.0756741	0.197679	-1.08313	7	krt39	nm_213656	Loss
chr21	43517969	43518456	+	37	6	43518202	0.127406	1.20255	2.23515	2.81574	2.24192	0.308659	1.05298	0.809914	0.734589	0.347289	1.08061	1.42832	1.01034	0.242091	1.48995	0.585106	0.918246	0.589469	-0.500781	-0.879425	-1.02026	-0.463418	-0.060943	-0.560426	-1.49776	7	c21orf128	nr_027243	Loss
chr1	78805586	78806163	+	45	7	78805894	0.127406	1.413	8.22216	8.90136	7.60495	0.332402	4.73843	3.79187	3.80258	0.254678	5.25898	5.39077	5.63834	0.207506	5.92771	0.472041	0.58655	0.359462	-0.323067	-0.644566	-0.640499	-0.172694	-0.136985	-0.0722043	-1.00873	7	mgc27382	nr_027310	Loss
chr18	20805207	20805861	+	106	9	20805570	0.222961	3.27696	6.02692	5.04108	6.28617	0.47486	2.15862	2.02479	2.03092	0.486204	2.1252	2.44197	1.9555	0.518765	3.34346	0.850078	0.592389	0.910838	-0.631235	-0.723574	-0.719209	-0.653742	-0.453296	-0.773809	-1.47577	7	cables1	nm_138375	Loss
chr15	70778700	70779778	+	77	11	70779229	0.445922	2.31492	5.26857	4.95025	4.7476	0.403631	1.68478	1.73027	2.03092	0.416746	1.65694	1.4744	1.40144	0.311259	2.77168	0.926648	0.836738	0.776435	-0.718206	-0.679764	-0.448628	-0.742243	-0.910636	-0.983854	-1.46214	7	uaca	nm_001008224	Loss
chr2	214883806	214884429	+	99	11	214884130	0.318515	3.1567	2.0755	1.63494	1.75837	0.213687	0.68444	0.625843	0.950644	0.277831	0.864489	1.1058	0.879973	0.55335	1.17556	0.820114	0.475898	0.580895	-0.780346	-0.90947	-0.306365	-0.443422	-0.0882532	-0.417811	-1.29103	7	vwc2l	nm_001080500	Loss
chr13	74777554	74778217	+	90	9	74777926	0.445922	2.826	4.51021	4.13277	3.5607	0.356145	1.57948	1.39894	1.25312	0.185221	2.01714	2.11945	2.63992	0.311259	2.57908	0.806338	0.680253	0.465302	-0.70741	-0.88252	-1.04133	-0.354545	-0.283169	0.0336362	-1.52772	7	klf12	nm_007249	Loss
chr8	32729246	32729923	+	59	7	32729598	0.445922	2.01428	3.8716	3.86028	3.07715	0.332402	0.473843	1.0308	0.950644	0.416746	1.26071	1.1058	1.1733	0.449597	1.86712	1.05211	1.04789	0.720774	-1.97834	-0.857054	-0.973841	-0.566578	-0.755729	-0.67025	-2.21	7	nrg1	nm_001159996	Loss
chr3	189490669	189491289	+	64	11	189491012	0.41407	1.98421	5.58787	5.94938	5.36302	0.213687	0.842388	1.06761	1.08028	0.185221	2.1252	1.88907	1.98809	0.311259	2.87699	0.957739	1.04818	0.898486	-1.772	-1.43017	-1.41316	-0.43696	-0.606882	-0.53318	-2.50658	7	tp63	nm_001114982	Loss
chr2	147808715	147809312	+	76	12	147809029	0.541476	2.40511	1.27723	1.08996	1.49461	0.308659	0.421194	1.2885	0.3889	0.439899	1.15265	0.967574	1.40144	0.415012	1.05356	0.277741	0.0490023	0.504496	-1.32272	0.290417	-1.43781	0.129682	-0.122832	0.411632	-1.10045	7	pabpc1p2	nr_026904	Loss
chr17	15862367	15862801	+	33	4	15862613	0.0955546	1.05223	2.47463	2.27075	1.93421	0.546089	0.737089	0.7731	0.993855	0.277831	2.26928	1.88907	2.34659	0.276675	1.74318	0.505494	0.381453	0.150023	-1.24181	-1.17299	-0.810611	0.380519	0.11596	0.42885	-1.42079	7	adora2b	nm_000676	Loss
chr4	107504622	107505108	+	58	9	107504868	0.254812	2.10447	2.03558	1.99826	2.24192	0.142458	0.842388	0.699472	0.993855	0.300984	1.72898	2.0273	1.66217	0.207506	1.5811	0.36451	0.337816	0.503803	-0.908375	-1.17659	-0.669824	0.128988	0.358627	0.0721373	-1.32031	7	gimd1	nm_001195138	Loss
chr11	35601029	35601600	+	39	3	35601298	0.159258	1.26268	2.23515	1.86202	1.53857	0.166201	1.00034	0.883543	0.950644	0.208373	1.00857	1.4744	1.5318	0.207506	1.38723	0.688168	0.424664	0.149389	-0.471719	-0.650831	-0.545226	-0.459891	0.0879233	0.143029	-0.976666	7	fjx1	nm_014344	Loss
chr2	40330562	40331160	+	57	9	40330865	0.382219	1.98421	6.8651	6.44894	6.98952	0.308659	3.00101	3.16603	2.20377	0.254678	5.18694	6.26619	5.24725	0.276675	5.04164	0.445389	0.35517	0.4713	-0.748446	-0.671218	-1.19392	0.0409901	0.313697	0.057668	-1.29515	7	slc8a1-as1	nr_038441	Loss
chr6	44025940	44026709	+	101	9	44026414	0.477773	3.12664	7.90285	7.35725	7.29723	0.356145	3.4222	2.68744	3.15441	0.509357	3.16979	4.6075	3.84581	0.207506	4.82716	0.711197	0.60799	0.596173	-0.496252	-0.844942	-0.613806	-0.606787	-0.0671931	-0.327889	-1.29012	7	c6orf223	nm_001171992	Loss
chr9	103191456	103192140	+	89	7	103191860	0.191109	2.79594	5.82735	6.3127	5.4949	0.356145	3.3169	2.61381	2.41982	0.347289	3.13377	3.96245	3.8784	0.415012	4.10668	0.504869	0.620285	0.420122	-0.308136	-0.651815	-0.763072	-0.390071	-0.0515809	-0.0825109	-1.08943	7	msantd3	nm_001198806	Loss
chr3	149104221	149105031	+	121	15	149104648	0.445922	3.66779	3.99134	3.17906	4.22009	0.189944	1.68478	1.98797	2.07413	0.300984	2.48541	2.71842	3.06361	0.345844	2.82276	0.499769	0.171495	0.580168	-0.744548	-0.505807	-0.444596	-0.183622	-0.0543345	0.118128	-0.982127	7	tm4sf1	nm_014220	Loss
chr5	36502549	36503231	+	62	9	36502881	0.445922	1.89402	2.59437	3.22447	2.54963	0.284916	1.10563	1.21487	1.72844	0.300984	1.87306	1.843	1.43403	0.415012	1.95195	0.410471	0.72415	0.385377	-0.820039	-0.684109	-0.17544	-0.0595159	-0.0828585	-0.444838	-1.06653	7	slc1a3	nm_001166696	Loss
chr6	22148238	22148876	+	109	14	22148558	0.764437	3.42728	2.51454	3.63321	2.54963	0.142458	0.842388	1.32531	1.1667	0.416746	1.33275	1.33617	1.5318	0.449597	1.80361	0.479406	1.01035	0.499401	-1.09833	-0.444555	-0.628457	-0.436479	-0.432783	-0.235658	-1.38684	7	casc14	nr_034143	Loss
chr17	69408848	69409410	+	56	9	69409129	0.318515	1.89402	4.07117	4.17819	3.95633	0.261173	1.73742	2.0616	0.950644	0.370441	1.4048	1.61262	2.05327	0.449597	2.44734	0.734228	0.771664	0.692949	-0.494263	-0.247449	-1.36424	-0.800854	-0.601804	-0.25329	-1.43493	7	casc17	nr_104152	Loss
chr10	64675899	64676409	+	101	17	64676102	0.382219	3.51747	1.71628	2.36158	2.02212	0.332402	0.473843	0.5154	0.518533	0.370441	0.612347	1.01365	0.749607	0.415012	1.10926	0.62968	1.09015	0.866271	-1.22712	-1.10584	-1.09709	-0.857181	-0.130043	-0.565395	-2.00538	7	egr2	nm_001136178	Loss
chr2	112419965	112420390	+	49	6	112420127	0.41407	1.77377	4.4703	4.72317	4.13217	0.569832	1.31623	1.8039	1.25312	0.486204	1.36877	1.2901	1.49921	0.518765	2.42855	0.880275	0.959659	0.766802	-0.883684	-0.428977	-0.95457	-0.827212	-0.912615	-0.695891	-1.62466	7	mir4435-1hg	nr_024373	Loss
chr9	26265115	26265527	+	28	4	26265384	0.254812	1.05223	4.86943	4.90483	4.61572	0.356145	1.52683	2.20886	1.81487	0.347289	3.63806	3.8703	3.58507	0.380428	3.44822	0.497903	0.508352	0.420704	-1.17531	-0.642551	-0.925988	0.077318	0.166593	0.0561522	-1.39027	7	loc100506422	nm_001004352	Loss
chrx	9346822	9347290	+	31	4	9347064	0.254812	1.05223	0.319307	0.363321	0.263755	0.213687	0.105298	0.2577	0.129633	0.115763	0.108061	0.322525	0.228141	0.276675	0.233082	0.454104	0.640404	0.17836	-1.14636	0.144852	-0.846404	-1.10899	0.468569	-0.0309138	-1.04026	7	tbl1x	nm_001139467	Loss
chr15	70784921	70785457	+	40	4	70785293	0.286664	1.44306	4.82952	4.90483	4.00029	0.23743	2.31657	1.95116	1.68523	0.324136	2.34133	2.30375	1.66217	0.345844	2.88832	0.741651	0.763975	0.469876	-0.31824	-0.565898	-0.777281	-0.302903	-0.326246	-0.797159	-1.21231	7	uaca	nm_001008224	Loss
chr5	159509991	159510501	+	48	8	159510156	0.350367	1.71364	3.83169	4.90483	3.60466	0.261173	1.68478	1.61983	1.72844	0.416746	1.87306	2.30375	2.54214	0.311259	2.67702	0.517352	0.873576	0.429234	-0.668071	-0.724786	-0.631154	-0.51523	-0.216645	-0.0745817	-1.28139	7	pwwp2a	nm_052927	Loss
chr2	71763483	71764063	+	73	3	71763788	0.222961	2.28485	1.99567	2.45242	1.93421	0.308659	0.579142	0.699472	0.518533	0.370441	1.4048	1.70477	1.79254	0.311259	1.4535	0.457337	0.754668	0.412205	-1.32755	-1.0552	-1.48703	-0.049176	0.230044	0.302468	-1.83133	7	dysf	nm_001130985	Loss
chr2	128266068	128266714	+	66	7	128266434	0.318515	2.19466	2.35489	3.17906	2.68151	0.332402	1.31623	1.50939	1.33954	0.463052	2.16122	2.34982	2.02068	0.276675	2.10137	0.164328	0.597267	0.351716	-0.674919	-0.47737	-0.649589	0.0405168	0.161221	-0.0564914	-0.97173	7	iws1	nm_017969	Loss
chr18	41472769	41473276	+	44	7	41473047	0.350367	1.47313	1.1974	1.08996	0.747307	0.308659	0.210597	0.736286	0.604955	0.347289	0.504285	0.737199	0.293324	0.587934	0.680146	0.81599	0.680361	0.135855	-1.69136	0.114421	-0.169017	-0.431605	0.116209	-1.21335	-1.12605	7	syt4	nm_020783	Loss
chr12	13500258	13500688	+	34	3	13500514	0.286664	1.20255	2.55446	2.49783	2.46172	0.451117	0.68444	0.7731	0.821011	0.370441	1.44082	1.33617	1.33626	0.345844	1.54509	0.725327	0.692986	0.671975	-1.17469	-0.998963	-0.912217	-0.100804	-0.209582	-0.209494	-1.72539	7	c12orf36	nr_036555	Loss
chr14	92977886	92978614	+	111	12	92978242	0.445922	3.33709	6.10675	6.35811	4.48384	0.284916	1.79007	2.24567	2.3334	0.370441	2.66551	3.54777	2.67251	0.484181	3.57818	0.771178	0.829372	0.325508	-0.999208	-0.67208	-0.616794	-0.424816	-0.0123136	-0.421031	-1.40471	7	rin3	nm_024832	Loss
chr7	22757710	22758251	+	57	8	22757959	0.254812	1.98421	6.82519	6.94851	6.94556	0.356145	2.89571	2.54019	2.24698	0.324136	3.78214	3.77815	4.75837	0.449597	4.52453	0.593101	0.618935	0.618322	-0.643852	-0.832834	-1.00978	-0.258565	-0.26009	0.0726996	-1.43894	7	il6	nm_000600	Loss
chr7	129932556	129933344	+	85	9	129932873	0.350367	2.58549	4.62995	5.04108	5.36302	0.284916	2.05332	2.54019	2.54945	0.370441	3.09775	4.0546	2.96583	0.172922	3.58836	0.367675	0.490409	0.579724	-0.805364	-0.498389	-0.493134	-0.212101	0.176235	-0.274885	-1.07823	7	cpa4	nm_001163446	Loss
chr2	5906076	5906765	+	72	7	5906482	0.509625	2.46524	3.51238	3.54238	4.08821	0.284916	0.947686	1.10443	0.950644	0.115763	1.83704	2.16552	2.11845	0.242091	2.25186	0.641331	0.653601	0.860351	-1.24864	-1.02782	-1.24414	-0.293734	-0.0564016	-0.0881056	-1.89196	7	sox11	nm_003108	Loss
chr18	68089356	68089952	+	43	6	68089566	0.191109	1.44306	3.43255	3.95111	2.81339	0.261173	1.42153	1.32531	1.72844	0.254678	2.23326	2.81057	1.79254	0.415012	2.38986	0.522357	0.725335	0.235385	-0.749481	-0.85059	-0.467451	-0.0977707	0.233939	-0.414921	-1.18353	7	rp11-41o4,2	nr_110764	Loss
chr10	64342453	64343106	+	47	2	64342768	0.318515	1.62345	9.49939	7.85681	8.17641	0.23743	4.31724	4.19683	4.45074	0.277831	5.79928	6.26619	5.14947	0.311259	6.19026	0.617834	0.343943	0.401468	-0.519892	-0.560701	-0.475955	-0.0941264	0.0175886	-0.265576	-0.973264	7	znf365	nm_199452	Loss
chrx	21950633	21951101	+	26	2	21950920	0.191109	1.05223	2.63428	2.77032	2.28588	0.166201	1.26358	1.36213	0.907433	0.208373	1.36877	1.79692	1.62958	0.345844	1.77988	0.565632	0.638274	0.360971	-0.49426	-0.385916	-0.971916	-0.378894	0.0137502	-0.127279	-1.13899	7	sms	nm_004595	Loss
chr4	17068642	17069046	+	43	7	17068784	0.382219	1.53326	5.70761	5.58606	5.67074	0.261173	2.84306	2.39293	3.1112	0.324136	4.32245	3.82422	4.36727	0.518765	4.20284	0.441524	0.410467	0.432173	-0.56392	-0.812586	-0.433893	0.0404844	-0.136198	0.055369	-1.03152	7	ldb2	nm_001290	Loss
chr1	44515429	44516134	+	60	7	44515708	0.41407	1.86396	6.42606	7.13017	6.59388	0.498603	2.31657	2.577	2.76551	0.578815	3.96224	6.12797	4.72578	0.55335	4.73613	0.440224	0.590228	0.477419	-1.03172	-0.878016	-0.776163	-0.257392	0.3717	-0.0031563	-1.39792	7	slc6a9	nm_001024845	Loss
chr7	130644806	130645600	+	205	8	130645264	0.286664	6.31341	10.4972	8.81053	9.71499	0.189944	4.94903	4.52816	4.06184	0.277831	5.94336	8.75424	6.5835	0.172922	7.09365	0.565407	0.3127	0.453684	-0.519383	-0.647604	-0.804394	-0.255249	0.303454	-0.107674	-1.10106	7	loc100506860	nr_109780	Loss
chr20	52828676	52829178	+	50	7	52828888	0.254812	1.71364	2.95359	2.90657	2.24192	0.332402	1.57948	1.87753	2.20377	0.439899	1.72898	2.25767	1.30366	0.380428	2.11702	0.480436	0.457282	0.0827013	-0.422587	-0.173199	0.0579372	-0.292114	0.0928028	-0.699462	-0.519423	6	pfdn4	nm_002623
chr1	78004481	78005807	+	77	10	78005604	0.445922	2.19466	7.78311	8.94677	7.56099	0.261173	5.89671	6.9579	6.48166	0.370441	5.18694	6.17404	5.11688	0.345844	6.67833	0.220859	0.421879	0.179086	-0.179577	0.0591638	-0.0431241	-0.364606	-0.113273	-0.384224	-0.328454	6	zzz3	nm_015534
chr1	96827965	96828596	+	52	4	96828310	0.41407	1.71364	2.59437	2.81574	2.90131	0.427374	1.63213	1.95116	1.59881	0.370441	1.65694	1.61262	1.9229	0.415012	2.07622	0.321425	0.439553	0.482745	-0.347206	-0.0896287	-0.37696	-0.325439	-0.364549	-0.110672	-0.685839	6	rp5-898j17,1	nr_110693
chr16	28175351	28176022	+	80	11	28175736	0.445922	2.52536	4.55013	5.35898	5.45094	0.356145	3.1063	2.8347	3.06799	0.254678	3.31388	4.0546	2.96583	0.345844	3.85593	0.238828	0.474881	0.499428	-0.311879	-0.443882	-0.329785	-0.218559	0.0724802	-0.37864	-0.766228	6	xpo6	nm_001270940
chr1	12193094	12193443	+	25	4	12193312	0.191109	0.841788	1.99567	2.81574	2.54963	0.332402	1.73742	2.17204	1.77165	0.254678	1.54888	1.38225	2.24882	0.380428	2.02468	-0.0208202	0.475819	0.332598	-0.220742	0.10136	-0.192595	-0.386471	-0.550676	0.151475	-0.366525	6	mir7846	nr_107000
chr2	112375451	112376564	+	113	11	112376019	0.41407	3.30702	5.54796	5.54064	6.94556	0.546089	4.31724	3.93913	4.92606	0.532509	3.49398	4.10067	3.51989	0.518765	4.70346	0.238235	0.236331	0.562368	-0.123614	-0.255845	0.0667134	-0.428852	-0.197862	-0.418191	-0.449893	6	mir4435-1hg	nr_024373
chr3	158427344	158427801	+	64	9	158427517	0.286664	2.1646	2.51454	3.76945	3.29694	0.356145	1.89537	2.02479	2.46303	0.347289	1.90908	1.88907	1.9555	0.311259	2.41309	0.0594168	0.643476	0.450249	-0.348398	-0.25311	0.029556	-0.338002	-0.353201	-0.303345	-0.575031	6	rarres1	nm_002888
chr11	43942146	43942806	+	60	6	43942511	0.445922	1.86396	1.1974	1.63494	1.67045	0.522346	1.26358	0.993986	0.734589	0.555662	0.864489	0.875424	1.30366	0.380428	1.17095	0.0322306	0.481564	0.512561	0.109842	-0.236379	-0.672668	-0.437757	-0.419622	0.154895	-0.60852	6	alkbh3-as1	nr_038907
chr4	159917806	159918218	+	29	3	159918024	0.222961	1.02217	1.11757	0.908302	1.14294	0.213687	0.631791	0.368143	0.950644	0.393594	0.684387	0.414675	0.651832	0.311259	0.763365	0.549926	0.250798	0.582304	-0.272927	-1.05211	0.316532	-0.157561	-0.880394	-0.227874	-0.797177	6	c4orf45	nm_152543
chr8	8163141	8163879	+	55	4	8163411	0.41407	1.7437	4.27073	4.95025	4.04425	0.308659	3.7381	3.05559	2.80872	0.370441	3.13377	2.30375	3.16138	0.172922	3.49628	0.288662	0.501679	0.21005	0.0964821	-0.194372	-0.315908	-0.15792	-0.601839	-0.145265	-0.471396	6	sgk223	nm_001080826
chr4	121214218	121215071	+	64	8	121214614	0.382219	1.98421	3.11324	3.54238	3.3409	0.047486	2.00067	2.8347	2.16055	0.254678	2.16122	2.2116	2.02068	0.207506	2.59844	0.260774	0.447073	0.362592	-0.377161	0.125551	-0.266243	-0.265797	-0.232556	-0.362805	-0.529431	6	mad2l1	nm_002358
chr2	42369245	42369901	+	55	8	42369304	0.509625	2.04434	6.82519	7.13017	6.28617	0.23743	4.63313	5.63259	5.18533	0.162068	4.50255	5.02217	4.62801	0.172922	5.53837	0.301408	0.364476	0.18272	-0.257473	0.0243369	-0.0950245	-0.298719	-0.14115	-0.25907	-0.392255	6	eml4	nm_019063
chr20	48929302	48929876	+	40	5	48929693	0.254812	1.44306	1.67636	1.72577	2.02212	0.379888	1.47418	1.21487	1.38275	0.509357	1.04459	1.38225	1.1733	0.657103	1.45513	0.204182	0.246092	0.47472	0.0187597	-0.260348	-0.0736061	-0.478213	-0.0741344	-0.310583	-0.413396	6	rp11-290f20,2	nr_109950
chr15	93346966	93347872	+	72	8	93347340	0.286664	2.1646	9.21999	9.35551	7.8687	0.261173	6.52851	7.32604	7.12983	0.324136	5.79928	5.75937	6.02944	0.484181	7.22408	0.351953	0.373003	0.123312	-0.14606	0.0202214	-0.0189452	-0.316939	-0.326902	-0.260788	-0.331017	6	asb9p1	nr_033769
chr18	59785462	59785960	+	37	6	59785783	0.318515	1.32281	1.15749	0.953717	1.1869	0.213687	0.631791	0.404957	0.604955	0.162068	0.792449	0.46075	0.586649	0.276675	0.753295	0.619711	0.340346	0.65591	-0.253768	-0.895445	-0.316386	0.0731024	-0.709232	-0.360718	-1.02719	6	pign	nm_012327
chr3	142033812	142034260	+	31	2	142034082	0.0955546	0.931979	1.15749	1.08996	1.27482	0.451117	1.05298	0.883543	0.7778	0.416746	0.756428	0.829349	0.782198	0.380428	0.956063	0.275819	0.1891	0.415112	0.139306	-0.113806	-0.297708	-0.337903	-0.205127	-0.289572	-0.38408	6	gk5	nr_033289
chr8	118751191	118751935	+	150	6	118751552	0.477773	4.59977	2.19524	1.58953	1.84629	0.356145	1.21093	1.14124	0.864222	0.370441	0.90051	1.24402	1.59699	0.380428	1.39877	0.650213	0.184435	0.400464	-0.208045	-0.293557	-0.69469	-0.63535	-0.169149	0.19119	-0.810468	6	med30	nm_001282986
chr6	90995154	90995781	+	45	4	90995478	0.286664	1.47313	1.59654	1.95285	2.06608	0.261173	1.31623	0.883543	1.1667	0.486204	0.97255	1.01365	1.1733	0.345844	1.34905	0.243002	0.533638	0.614956	-0.0355298	-0.61057	-0.209509	-0.472097	-0.412384	-0.201374	-0.749069	6	bach2	nm_021813
chr7	32132908	32133535	+	70	10	32133216	0.382219	2.25479	6.2664	5.7223	5.4949	0.308659	4.63313	4.19683	4.10505	0.208373	2.52143	2.71842	2.83547	0.55335	4.2771	0.551003	0.419961	0.361459	0.115354	-0.0273347	-0.0592333	-0.762394	-0.653865	-0.593047	-0.434546	6	pde1c	nm_005020
chr11	64622300	64622851	+	33	2	64622662	0.254812	1.14243	6.30632	7.13017	5.45094	0.403631	3.5275	3.64461	3.19762	0.601967	3.99826	4.46927	3.65026	0.449597	4.59722	0.456036	0.633176	0.245745	-0.382115	-0.334994	-0.523762	-0.201387	-0.0407214	-0.332762	-0.85861	6	cdc42bpg	nm_017525
chr17	41047141	41047640	+	47	6	41047414	0.286664	1.47313	0.918008	1.08996	1.1869	0.451117	1.00034	0.809914	0.561744	0.324136	0.648367	0.737199	0.488874	0.518765	0.826811	0.150948	0.398648	0.521567	0.274854	-0.029789	-0.557645	-0.350748	-0.165504	-0.758096	-0.461248	6	linc00671	nr_027254
chr22	40357306	40357795	+	37	5	40357524	0.222961	1.26268	1.55662	1.08996	1.45065	0.427374	0.737089	0.552214	0.907433	0.439899	0.864489	0.691124	1.23848	0.345844	1.00979	0.62437	0.110229	0.522655	-0.454138	-0.870749	-0.154186	-0.224129	-0.547032	0.294522	-0.912109	6	fam83f	nm_138435
chr5	127552473	127553351	+	67	7	127552816	0.509625	2.04434	2.79394	3.22447	2.94527	0.783519	2.73776	2.68744	2.46303	0.463052	1.36877	1.56655	1.04293	0.657103	2.31446	0.271622	0.478385	0.347721	0.242319	0.215557	0.0897581	-0.757792	-0.563088	-1.15003	-0.183365	6	slc12a2	nr_046207
chr19	45245095	45245418	+	21	1	45245332	0.191109	0.78166	6.94493	7.31183	6.41805	0.379888	4.89638	5.11719	5.48781	0.185221	4.64663	4.56142	4.10654	0.207506	5.49897	0.336797	0.41107	0.222972	-0.167447	-0.103812	-0.00293239	-0.242978	-0.269679	-0.421239	-0.41501	6	bcl3	nm_005178
chr4	129438865	129439626	+	64	7	129439052	0.286664	2.01428	6.8651	6.90309	6.94556	0.47486	4.52783	4.45453	3.84579	0.393594	4.93479	4.83787	4.62801	0.311259	5.32695	0.365971	0.373933	0.38278	-0.234489	-0.258037	-0.470031	-0.110321	-0.138938	-0.20292	-0.695081	6	pgrmc2	nm_006320
chr6	122203069	122203990	+	67	7	122203502	0.41407	2.07441	7.22432	6.40353	7.42911	0.261173	4.47519	4.08639	5.79029	0.277831	4.64663	5.80544	4.92133	0.276675	5.64247	0.356536	0.18254	0.396862	-0.334379	-0.465501	0.0373081	-0.280142	0.0410799	-0.197278	-0.56617	6	gja1	nm_000165
chr10	59917100	59917734	+	72	3	59917383	0.41407	2.31492	1.63645	1.86202	1.4067	0.284916	0.842388	0.7731	1.20991	0.115763	0.612347	0.414675	0.554057	0.311259	1.03463	0.661458	0.847758	0.443199	-0.296554	-0.420383	0.22579	-0.75669	-1.31906	-0.901004	-0.814521	6	ipmk	nm_152230
chr1	223894758	223895415	+	42	6	223895022	0.350367	1.44306	3.75186	6.04021	5.01135	0.356145	2.36922	2.577	3.19762	0.300984	3.42194	2.7645	2.60733	0.345844	3.52678	0.089254	0.776247	0.506848	-0.573942	-0.452659	-0.141352	-0.0435383	-0.351334	-0.43578	-0.846767	6	capn2	nm_001748
chr1	14813100	14813825	+	71	10	14813525	0.254812	2.34498	4.4703	4.54151	4.48384	0.261173	2.63246	2.02479	2.59267	0.277831	2.48541	2.71842	2.54214	0.172922	3.16573	0.497835	0.520635	0.502198	-0.266124	-0.644767	-0.2881	-0.349055	-0.219767	-0.316491	-0.906553	6	kazn	nm_015209
chr2	238322648	238323139	+	36	3	238322870	0.222961	1.14243	7.06467	7.85681	6.6818	0.498603	6.58115	5.59577	5.61744	0.254678	4.75469	4.93002	4.2695	0.276675	5.92798	0.25308	0.406402	0.172695	0.150799	-0.0832045	-0.0776283	-0.31819	-0.265948	-0.473475	-0.280737	6	col6a3	nm_004369
chr18	6731193	6731685	+	39	6	6731478	0.254812	1.38294	0.878095	1.54411	1.14294	0.261173	0.473843	0.736286	0.475322	0.300984	0.432245	0.1843	0.586649	0.55335	0.717088	0.292226	1.10656	0.672527	-0.597741	0.0381158	-0.593245	-0.730302	-1.9601	-0.289653	-1.07473	6	arhgap28	nm_001010000
chr12	19924737	19925229	+	39	6	19924964	0.318515	1.44306	2.87376	3.67862	3.78049	0.261173	1.94802	1.91434	2.67909	0.300984	2.59347	2.25767	2.44437	0.276675	2.68554	0.0977304	0.453955	0.493363	-0.463201	-0.488362	-0.0034693	-0.0503286	-0.250375	-0.135749	-0.666694	6	rp11-664h17,1	nr_040098
chr8	144536790	144537173	+	20	2	144536956	0.0955546	0.661405	1.75619	2.27075	2.50568	0.569832	1.10563	1.43576	1.1667	0.555662	1.62092	1.15187	1.79254	0.207506	1.64512	0.0942593	0.464983	0.607011	-0.573315	-0.196377	-0.495756	-0.0213782	-0.514206	0.123814	-0.810567	6	mafa	nm_201589
chr2	118818819	118819339	+	42	5	118819040	0.382219	1.53326	2.59437	3.72404	2.63755	0.451117	3.36955	3.49736	3.45689	0.601967	1.4048	1.38225	1.33626	0.449597	2.60034	-0.00331573	0.518168	0.0205002	0.373856	0.427565	0.410774	-0.88834	-0.911683	-0.960505	0.225614	6	insig2	nm_016133
chr12	64575329	64575826	+	47	7	64575400	0.382219	1.89402	6.46597	8.03847	6.9016	0.332402	3.94869	4.08639	3.889	0.324136	4.79071	4.28497	4.62801	0.415012	5.22598	0.307165	0.62122	0.401229	-0.404326	-0.354876	-0.426302	-0.125461	-0.286416	-0.17531	-0.838373	6	c12orf66	nm_152440
chr2	235330870	235331297	+	28	3	235331004	0.191109	0.931979	3.51238	4.08736	2.81339	0.427374	2.36922	1.98797	3.02478	0.300984	1.80102	3.36347	2.41178	0.449597	2.81904	0.317244	0.535965	-0.00289429	-0.250794	-0.503907	0.101625	-0.64639	0.254747	-0.225107	-0.50113	6	arl4c	nm_005737
chr2	47039730	47040051	+	31	5	47039880	0.159258	1.29275	11.2955	12.5346	10.4183	0.379888	7.00235	6.40569	7.21625	0.254678	5.295	6.40442	5.54057	0.484181	8.01252	0.495419	0.645584	0.378797	-0.194417	-0.322903	-0.151006	-0.597626	-0.323188	-0.532221	-0.729375	6	linc01118	nr_034099
chr15	25637255	25637676	+	45	7	25637332	0.222961	1.7437	2.6742	2.27075	3.07715	0.308659	1.68478	1.14124	1.77165	0.578815	1.83704	1.75085	1.69476	0.345844	1.98916	0.426948	0.191014	0.629435	-0.239601	-0.801552	-0.16706	-0.114775	-0.184104	-0.231075	-0.818537	6	ube3a	nm_130838
chr2	110405443	110405829	+	27	4	110405756	0.222961	0.962043	5.14883	4.04194	4.04425	0.284916	3.4222	2.54019	3.41368	0.208373	2.73755	3.04095	2.63992	0.380428	3.44772	0.5786	0.229406	0.230228	-0.0107192	-0.440709	-0.0143171	-0.332758	-0.181123	-0.38515	-0.501327	6	sowahc	nm_023016
chr19	8488788	8489110	+	23	3	8488928	0.127406	0.691469	1.91584	2.04368	2.3738	0.261173	1.47418	1.25169	1.51239	0.416746	1.51286	1.24402	1.49921	0.449597	1.64752	0.217684	0.310874	0.526903	-0.160383	-0.396422	-0.123466	-0.12302	-0.405281	-0.136089	-0.578578	6	march2	nm_001005415
chr1	151967449	151967906	+	32	5	151967631	0.191109	1.14243	1.75619	1.72577	1.93421	0.356145	0.737089	0.920357	1.1667	0.277831	1.04459	0.552899	1.14071	0.207506	1.21983	0.525763	0.500558	0.665056	-0.726774	-0.40642	-0.0642524	-0.223747	-1.1416	-0.0967589	-0.962941	6	s100a10	nm_002966
chr18	71983807	71984503	+	101	4	71984204	0.286664	3.12664	0.838181	0.908302	0.659388	0.356145	0.895037	0.552214	0.821011	0.324136	0.360204	0.3686	0.391099	0.311259	0.643782	0.38069	0.4966	0.0345565	0.475376	-0.221343	0.350829	-0.837758	-0.804517	-0.719038	-0.102328	6	c18orf63	nm_001174123
chr6	56803221	56803917	+	59	7	56803574	0.350367	1.80383	4.19091	4.49609	4.79156	0.379888	2.31657	2.90833	4.10505	0.393594	2.84561	3.36347	3.35693	0.484181	3.59717	0.2204	0.32181	0.413632	-0.634874	-0.306671	0.190539	-0.338124	-0.0969108	-0.0997179	-0.56895	6	dst	nm_001144769
chr15	61519435	61519966	+	35	1	61519802	0.254812	1.11236	0.35922	0.317906	0.219796	0.403631	0.157948	0.294514	0.3889	0.463052	0.180102	0.27645	0.130366	0.311259	0.258356	0.47551	0.29924	-0.233193	-0.709912	0.188979	0.590039	-0.520546	0.0976579	-0.986788	-0.157484	6	rora	nm_134261
chr1	186781737	186782078	+	26	3	186781888	0.0955546	0.962043	3.03342	3.17906	2.85735	0.166201	1.73742	2.54019	1.98771	0.324136	1.83704	2.11945	1.9555	0.311259	2.36079	0.361673	0.429328	0.275407	-0.44232	0.105663	-0.248163	-0.361888	-0.155582	-0.271737	-0.550409	6	pla2g4a	nm_024420
chr11	38482419	38482944	+	46	5	38482719	0.191109	1.83389	5.86727	5.58606	5.36302	0.213687	3.58015	3.57099	3.54331	0.370441	3.60204	3.77815	3.58507	0.207506	4.27512	0.456725	0.385866	0.327083	-0.255945	-0.259641	-0.270866	-0.24715	-0.178285	-0.253961	-0.652042	6	lrrc4c	nr_047673
chr1	85163794	85164351	+	37	5	85164078	0.254812	1.32281	4.43039	4.95025	4.5278	0.23743	2.36922	2.20886	2.98157	0.416746	2.70153	2.67235	2.90065	0.311259	3.30473	0.422899	0.582966	0.454276	-0.480124	-0.581233	-0.148464	-0.290758	-0.306426	-0.188157	-0.889988	6	ssx2ip	nm_001166294
chr8	80238430	80238848	+	29	3	80238645	0.159258	1.11236	5.94709	5.26815	4.70364	0.427374	3.26425	3.68143	3.41368	0.324136	3.20581	3.22525	3.45471	0.311259	4.01822	0.565627	0.390739	0.227219	-0.299805	-0.126292	-0.235231	-0.325867	-0.317148	-0.217994	-0.614971	6	stmn2	nm_007029
chr6	85895755	85896201	+	51	8	85895972	0.254812	1.80383	6.70545	6.67602	5.4949	0.23743	4.15929	3.75506	4.79643	0.115763	2.98969	4.37712	3.97617	0.207506	4.77002	0.49134	0.484994	0.2041	-0.197657	-0.345159	0.00796756	-0.673997	-0.124012	-0.262613	-0.571761	6	nt5e	nm_001204813
chr2	238116881	238117401	+	73	12	238117172	0.445922	2.55543	4.62995	4.54151	2.76943	0.498603	2.21127	1.91434	2.37661	0.578815	1.80102	1.56655	1.9555	0.415012	2.64069	0.810085	0.782259	0.0686766	-0.256039	-0.464064	-0.152008	-0.552099	-0.753324	-0.433379	-0.844377	6	cops8	nm_006710
chr22	30591818	30593044	+	108	16	30592484	0.573328	3.12664	6.10675	6.40353	5.40698	0.094972	3.6328	3.38691	3.19762	0.138915	3.45796	3.77815	3.22657	0.276675	4.28858	0.509903	0.578365	0.334322	-0.239421	-0.34053	-0.423503	-0.310582	-0.182823	-0.410502	-0.808681	6	lif	nm_002309
chr1	12655961	12656879	+	54	2	12656659	0.159258	1.62345	5.98701	7.67515	7.07743	0.284916	5.05433	4.23364	4.49395	0.277831	3.78214	3.8703	4.33468	0.0345844	5.16763	0.212333	0.570693	0.453725	-0.0319828	-0.287602	-0.201516	-0.450299	-0.417058	-0.253576	-0.585951	6	mir6730	nr_106788
chr5	135393781	135394643	+	65	8	135394268	0.382219	1.95415	5.14883	4.76859	5.62678	0.356145	2.79041	3.49736	2.7223	0.324136	2.55745	2.5802	2.28141	0.415012	3.55259	0.535372	0.42469	0.663438	-0.348395	-0.0226061	-0.384046	-0.474167	-0.46139	-0.638945	-0.792849	6	vtrna2-1	nr_030583
chr12	118122837	118123613	+	44	5	118123426	0.254812	1.47313	3.07333	3.36072	3.07715	0.379888	1.89537	2.17204	2.63588	0.370441	1.9451	2.11945	2.93324	0.311259	2.57914	0.252912	0.381878	0.254701	-0.44441	-0.247838	0.0313917	-0.407046	-0.283203	0.185605	-0.516783	6	ksr2	nm_173598
chr19	1177484	1178118	+	47	3	1177808	0.286664	1.56332	5.86727	5.63147	6.46201	0.356145	4.42254	4.71223	4.92606	0.509357	3.67408	4.69965	4.2695	0.415012	4.96276	0.241548	0.182371	0.380841	-0.166268	-0.0747316	-0.0107058	-0.433758	-0.0785894	-0.217075	-0.352155	6	sbno2	nm_014963
chr17	61433589	61434051	+	62	10	61433836	0.41407	2.1646	2.55446	2.22534	2.63755	0.284916	2.05332	1.58301	1.81487	0.231526	1.4048	1.61262	2.314	0.242091	2.02222	0.337077	0.138086	0.383261	0.0220193	-0.353265	-0.156076	-0.52558	-0.32653	0.194451	-0.448582	6	cyb561	nm_001017917
chr8	27805901	27806456	+	42	4	27806193	0.350367	1.44306	3.79177	3.08823	3.3409	0.47486	2.73776	3.53417	2.59267	0.370441	2.16122	1.843	1.9229	0.518765	2.77918	0.448213	0.152119	0.265578	-0.0216633	0.346713	-0.100223	-0.362811	-0.592605	-0.531373	-0.213694	6	scara5	nm_173833
chr2	238130748	238131332	+	37	5	238131048	0.286664	1.413	4.98917	6.08562	5.27511	0.427374	2.36922	2.24567	2.3334	0.324136	1.51286	1.42832	1.72735	0.311259	3.10741	0.683086	0.969691	0.763486	-0.391305	-0.468567	-0.413281	-1.03844	-1.12139	-0.84715	-1.22981	6	cops8	nm_006710
chr6	152418088	152418686	+	53	5	152418350	0.286664	1.7437	3.75186	4.2236	4.04425	0.379888	2.10597	2.3193	2.16055	0.277831	1.11663	1.98122	1.43403	0.380428	2.57082	0.545374	0.716243	0.65364	-0.287747	-0.148541	-0.250829	-1.20308	-0.37584	-0.842156	-0.867459	6	esr1	nm_000125
chr3	107241487	107242032	+	58	7	107241796	0.318515	1.83389	2.15532	1.99826	2.28588	0.403631	1.10563	1.50939	1.5556	0.254678	1.47684	1.05972	1.40144	0.172922	1.61645	0.415072	0.305915	0.499917	-0.547958	-0.0988705	-0.0553617	-0.130323	-0.609144	-0.205924	-0.641032	6	bbx	nm_001142568
chr1	26021414	26021997	+	36	6	26021786	0.286664	1.29275	6.90502	7.85681	7.29723	0.47486	7.26559	7.54693	6.95699	0.532509	4.64663	4.19282	4.13913	0.449597	6.31191	0.129569	0.315868	0.209273	0.203005	0.257814	0.140387	-0.441891	-0.590154	-0.608747	-0.0178349	6	man1c1	nm_020379
chr5	38464077	38464804	+	114	7	38464475	0.350367	3.60766	2.83385	3.3153	3.1211	0.47486	1.57948	1.50939	1.51239	0.370441	2.05316	1.79692	1.5644	0.311259	2.14289	0.403207	0.629584	0.5425	-0.440109	-0.505595	-0.502728	-0.0617088	-0.254028	-0.45395	-1.00791	6	egflam	nm_182801
chr10	119368726	119369293	+	41	6	119369059	0.191109	1.50319	5.98701	6.26728	6.11033	0.23743	5.05433	5.154	4.88285	0.231526	3.8902	4.33105	3.58507	0.415012	5.02913	0.251528	0.317533	0.280943	0.00721145	0.0353853	-0.042583	-0.370462	-0.215592	-0.488304	-0.28333	6	emx2os	nr_002791
chr12	63124335	63124912	+	43	7	63124638	0.159258	1.50319	10.9363	10.5363	9.0556	0.189944	5.31757	6.9579	6.48166	0.277831	6.23153	5.94367	6.51832	0.242091	7.5532	0.53396	0.480208	0.261722	-0.506321	-0.118436	-0.220724	-0.277503	-0.345735	-0.212589	-0.707124	6	mirlet7i	nr_029661
chr7	55392971	55393711	+	116	10	55393338	0.637031	3.60766	0.878095	0.862887	0.879184	0.498603	0.526492	0.368143	0.518533	0.62512	0.432245	0.598974	0.61924	0.415012	0.631533	0.475519	0.450314	0.477309	-0.262445	-0.778591	-0.284421	-0.547009	-0.0763628	-0.0283581	-0.909533	6	lancl2	nm_018697
chr1	78744682	78745301	+	60	9	78744866	0.254812	1.95415	3.79177	4.45068	3.20902	0.213687	3.4222	3.27647	2.7223	0.347289	2.01714	2.44197	2.73769	0.518765	3.11881	0.281878	0.513032	0.0411404	0.13393	0.0711494	-0.196168	-0.628681	-0.352947	-0.188033	-0.275713	6	mgc27382	nr_027310
chr3	30327351	30327988	+	51	6	30327711	0.286664	1.59338	5.82735	4.76859	4.96739	0.308659	3.26425	3.31329	3.84579	0.347289	2.66551	3.22525	2.50955	0.415012	3.82077	0.608976	0.319696	0.378624	-0.227112	-0.205602	0.00941406	-0.519454	-0.244455	-0.606435	-0.576865	6	tgfbr2	nm_001024847
chr8	33210838	33211461	+	57	8	33211147	0.382219	1.80383	2.15532	2.67949	2.28588	0.403631	2.68511	1.32531	1.38275	0.439899	1.72898	1.15187	1.59699	0.380428	1.88797	0.19107	0.505124	0.275915	0.508147	-0.5105	-0.449289	-0.126914	-0.712852	-0.241481	-0.474583	6	fut10	nm_032664
chr21	36260674	36261251	+	35	3	36261012	0.159258	1.26268	7.38398	8.7197	7.03348	0.166201	5.68612	5.6694	4.83964	0.208373	4.32245	4.88395	4.79096	0.0691687	5.92552	0.317457	0.557337	0.247296	-0.0594975	-0.0637451	-0.292041	-0.455093	-0.278894	-0.306626	-0.512458	6	runx1	nm_001122607
chr17	81150831	81151330	+	39	5	81151098	0.318515	1.38294	10.8964	11.7171	11.5173	0.498603	7.00235	6.81064	6.56809	0.555662	7.2401	7.83274	7.72421	0.311259	8.58988	0.343136	0.447906	0.423095	-0.294799	-0.334846	-0.387164	-0.246628	-0.13312	-0.153251	-0.743649	6	flj43681	nr_029406
chr3	71221971	71222476	+	43	7	71222213	0.318515	1.62345	8.86077	9.17385	7.38515	0.189944	5.58082	5.81666	5.66065	0.208373	3.85418	3.3174	3.71544	0.311259	5.92944	0.579538	0.629632	0.316732	-0.0874179	-0.0277043	-0.0669262	-0.62147	-0.837843	-0.674361	-0.569317	6	foxp1	nm_001244815
chr13	64055448	64055876	+	62	10	64055634	0.509625	2.10447	0.678528	0.544981	0.351674	0.23743	0.368545	0.441771	0.302478	0.185221	0.540306	0.0921499	0.358507	0.311259	0.408771	0.731114	0.414913	-0.217055	-0.149454	0.112007	-0.434464	0.402483	-2.14924	-0.18929	-0.466961	6	or7e156p	nr_002171
chr4	111208238	111208686	+	28	3	111208454	0.222961	0.992107	1.07766	0.953717	0.923144	0.522346	0.789739	0.662657	0.691377	0.393594	0.540306	0.829349	0.554057	0.484181	0.780223	0.465945	0.289675	0.242669	0.0174885	-0.235624	-0.174413	-0.53011	0.0880931	-0.493852	-0.463612	6	elovl6	nm_024090
chr12	96821033	96821609	+	37	2	96821328	0.254812	1.26268	6.94493	7.67515	5.53886	0.261173	4.52783	5.55896	4.79643	0.277831	5.25898	4.0546	5.14947	0.415012	5.50058	0.336377	0.480612	0.0100061	-0.280762	0.015231	-0.197622	-0.0648014	-0.440025	-0.0951592	-0.430049	6	cdk17	nm_002595
chr1	210435745	210436693	+	72	10	210436012	0.41407	2.1646	6.14666	6.40353	6.02241	0.213687	4.68578	3.20284	3.80258	0.347289	3.99826	5.02217	3.0962	0.138337	4.70894	0.384401	0.443465	0.35494	-0.00711179	-0.556048	-0.308424	-0.236028	0.0929093	-0.604902	-0.684797	6	sertad4-as1	nr_024337
chr20	42567769	42568517	+	75	12	42568130	0.382219	2.31492	2.6742	2.90657	2.81339	0.427374	1.68478	1.73027	1.90129	0.347289	1.5849	1.98122	1.62958	0.484181	2.10069	0.348244	0.468454	0.421448	-0.318305	-0.279863	-0.143884	-0.406472	-0.0844703	-0.366362	-0.660066	6	tox2	nm_001098798
chr14	77384517	77385907	+	108	19	77385463	0.254812	3.03645	7.4638	7.76598	6.72576	0.332402	4.36989	5.52214	5.35818	0.231526	4.79071	5.75937	4.20432	0.345844	5.77335	0.370502	0.42776	0.220289	-0.401813	-0.0641802	-0.107667	-0.269169	-0.00349776	-0.457538	-0.530737	6	lrrc74	nm_194287
chr1	172113655	172114576	+	100	7	172114056	0.477773	3.00638	9.65904	9.94591	10.2425	0.23743	8.58183	7.14197	7.73479	0.208373	6.44765	7.37199	6.90942	0.484181	8.22612	0.231667	0.273891	0.316284	0.0610723	-0.20389	-0.0888509	-0.351439	-0.158158	-0.251648	-0.35117	6	dnm3os	nr_038397
chr11	26968816	26969628	+	109	7	26969238	0.286664	3.36715	5.02909	5.26815	4.26404	0.118715	3.89604	3.49736	3.06799	0.115763	2.91765	3.91637	3.94358	0.103753	3.97781	0.338323	0.405323	0.100249	-0.029964	-0.185708	-0.374681	-0.447166	-0.0224563	-0.012467	-0.478083	6	fibin	nm_203371
chr5	95005202	95005601	+	28	3	95005428	0.286664	1.23262	2.75402	3.99653	3.86841	0.403631	1.73742	1.95116	1.9445	0.764035	2.66551	2.44197	2.11845	0.830025	2.60866	0.0782296	0.615436	0.56843	-0.586361	-0.418981	-0.423913	0.0310995	-0.0952643	-0.3003	-0.897117	6	spata9	nm_031952
chr8	95319621	95320202	+	72	11	95319911	0.541476	2.31492	0.997835	0.953717	1.23086	0.356145	1.05298	0.957172	0.604955	0.254678	1.08061	0.691124	0.586649	0.345844	0.906212	0.138953	0.073713	0.441744	0.216564	0.0789293	-0.58302	0.253928	-0.390903	-0.627352	-0.313979	6	gem	nm_005261
chr19	4066612	4067123	+	29	1	4066888	0.0318515	0.901915	1.87593	2.407	2.46172	0.071229	1.68478	1.14124	1.20991	0.115763	1.15265	1.2901	1.23848	0.0345844	1.60687	0.223355	0.582985	0.615414	0.0683055	-0.493645	-0.40935	-0.479293	-0.316769	-0.37568	-0.752148	6	zbtb7a	nm_015898
chr3	112348116	112348661	+	45	7	112348388	0.286664	1.47313	2.71411	2.27075	2.59359	0.213687	2.57981	1.95116	2.03092	0.254678	1.62092	1.843	1.49921	0.242091	2.12261	0.354641	0.0973334	0.289114	0.281428	-0.121508	-0.0637041	-0.389028	-0.203784	-0.501633	-0.214958	6	ccdc80	nm_199512
chr12	122884627	122885376	+	46	5	122885184	0.222961	1.50319	6.02692	5.85855	5.09927	0.356145	3.6328	4.23364	4.10505	0.254678	4.10632	3.82422	4.07395	0.242091	4.55119	0.405177	0.364299	0.164046	-0.325164	-0.104345	-0.148843	-0.148397	-0.251078	-0.159817	-0.503958	6	rp11-450k4,1	nr_045382
chr19	46010487	46011010	+	32	4	46010780	0.222961	1.05223	6.90502	6.72143	6.24221	0.356145	3.89604	5.59577	5.35818	0.486204	5.15092	4.37712	4.82356	0.415012	5.45225	0.340793	0.301918	0.195205	-0.484842	0.0374858	-0.0251096	-0.0820226	-0.316869	-0.176755	-0.436794	6	vasp	nm_003370
chr12	108761038	108761657	+	47	8	108761433	0.254812	1.53326	1.91584	3.81487	2.3738	0.498603	2.52716	2.46656	1.77165	0.532509	1.62092	1.15187	1.85772	0.345844	2.16671	-0.177528	0.816127	0.131691	0.222012	0.186992	-0.290409	-0.418696	-0.911524	-0.221973	-0.217231	6	cmklr1	nm_004072
chr10	123702160	123702736	+	71	8	123702454	0.254812	2.31492	1.95576	1.99826	1.36274	0.379888	1.47418	0.883543	1.42597	0.416746	1.22469	0.875424	1.36885	0.276675	1.3966	0.485807	0.516828	-0.0354138	0.0779916	-0.660548	0.0300199	-0.189499	-0.673866	-0.0289588	-0.506585	6	ate1	nm_001288736
chr8	109437730	109438514	+	63	10	109438068	0.286664	1.92409	1.1974	1.99826	0.923144	0.379888	0.842388	0.441771	0.907433	0.231526	0.97255	0.645049	0.651832	0.587934	0.953315	0.328882	1.06772	-0.0463976	-0.178468	-1.10965	-0.0711617	0.0288204	-0.563543	-0.548453	-0.903163	6	emc2	nm_014673
chr3	106147413	106147847	+	36	3	106147615	0.318515	1.47313	3.51238	3.95111	3.07715	0.284916	1.73742	1.65664	2.03092	0.416746	1.54888	1.98122	1.69476	0.276675	2.3545	0.577028	0.746839	0.386173	-0.438469	-0.507157	-0.213286	-0.604198	-0.249029	-0.474337	-0.956317	6	cblb	nm_170662
chr4	7829932	7830576	+	59	6	7830270	0.350367	1.89402	4.62995	4.95025	4.83551	0.427374	2.89571	3.38691	2.41982	0.324136	2.62949	2.53412	2.67251	0.518765	3.43936	0.428856	0.525358	0.491527	-0.248226	-0.0221702	-0.507241	-0.38736	-0.440656	-0.363946	-0.741126	6	afap1-as1	nr_026892
chr22	34054640	34055269	+	68	8	34054918	0.286664	2.34498	2.59437	2.58866	2.11004	0.593575	2.21127	1.5462	2.11734	0.439899	1.00857	1.42832	1.46662	0.484181	1.89682	0.4518	0.448621	0.153688	0.221289	-0.294857	0.158671	-0.911272	-0.409262	-0.371088	-0.323002	6	large-as1	nr_038949
chr14	55568835	55569364	+	41	5	55569136	0.318515	1.32281	4.35056	5.49523	4.13217	0.284916	2.73776	3.6078	3.37047	0.439899	3.60204	2.99487	3.22657	0.55335	3.72416	0.224285	0.561263	0.149983	-0.44392	-0.0457962	-0.143968	-0.0481021	-0.314421	-0.206916	-0.523072	6	lgals3	nm_001177388
chr4	140164449	140165106	+	43	4	140164709	0.222961	1.38294	4.31065	4.17819	4.83551	0.308659	2.15862	3.46054	3.32725	0.347289	2.80959	3.27132	3.19398	0.415012	3.50507	0.29846	0.253433	0.464225	-0.699336	-0.0184457	-0.0751122	-0.319085	-0.0995706	-0.134091	-0.603004	6	mgarp	nm_032623
chr9	101751758	101752347	+	71	5	101752173	0.382219	2.19466	2.47463	1.72577	1.75837	0.356145	1.47418	1.17806	0.993855	0.578815	1.04459	1.19795	0.749607	0.380428	1.39967	0.822128	0.302159	0.329153	0.0748269	-0.248675	-0.493977	-0.422146	-0.224518	-0.900879	-0.707088	6	col15a1	nm_001855
chr19	4870054	4870602	+	48	0	4870354	0.0637031	1.47313	3.39264	3.95111	3.29694	0.546089	1.79007	2.72426	2.54945	0.509357	2.19724	2.5802	1.98809	0.449597	2.71889	0.31939	0.539242	0.278111	-0.602998	0.00284548	-0.092829	-0.307323	-0.0755361	-0.451637	-0.609908	6	plin3	nm_001164189
chr16	78718037	78718576	+	58	9	78718192	0.509625	2.22472	8.70112	9.0376	9.23144	0.308659	6.37056	6.40569	6.35203	0.231526	5.07887	4.7918	4.98651	0.242091	6.77285	0.361439	0.416178	0.446793	-0.0883426	-0.080409	-0.0925444	-0.415253	-0.499196	-0.441731	-0.495235	6	wwox	nm_130844
chr3	58036903	58037256	+	52	7	58037110	0.382219	1.71364	5.069	5.90396	5.67074	0.47486	3.4222	3.3501	3.97542	0.416746	3.81816	4.33105	3.58507	0.415012	4.3473	0.221581	0.441564	0.383417	-0.345196	-0.375915	-0.129012	-0.187242	-0.00540443	-0.278117	-0.632229	6	flnb	nm_001457
chr22	27566330	27567044	+	57	4	27566682	0.41407	1.92409	4.23082	4.35985	4.308	0.213687	2.26392	2.13523	2.41982	0.555662	2.3053	2.16552	2.18364	0.380428	2.93023	0.529921	0.573263	0.556004	-0.372195	-0.456625	-0.276115	-0.346058	-0.4363	-0.424283	-0.921374	6	rp1-90l6,2	nr_110540
chr7	80351126	80351768	+	46	6	80351380	0.222961	1.50319	10.2178	10.4909	10.9458	0.23743	8.05533	6.9579	8.08047	0.532509	9.14918	7.27984	7.78939	0.276675	8.77408	0.219769	0.257818	0.319064	-0.123303	-0.334595	-0.118807	0.0603951	-0.26934	-0.171737	-0.457785	6	cd36	nm_001289908
chr10	30184480	30184780	+	36	6	30184565	0.191109	1.32281	2.15532	2.17992	1.71441	0.332402	1.42153	1.69346	1.68523	0.532509	1.22469	1.19795	0.81479	0.311259	1.56526	0.461505	0.477879	0.131313	-0.138955	0.113573	0.106549	-0.353979	-0.385833	-0.941899	-0.329844	6	svil	nm_003174
chr6	158185542	158186086	+	77	9	158185854	0.127406	2.55543	4.94926	4.72317	4.39592	0.569832	2.94836	2.577	3.19762	0.532509	2.77357	2.5802	2.28141	0.380428	3.38072	0.549881	0.482424	0.378834	-0.197421	-0.391639	-0.080333	-0.285588	-0.38985	-0.567405	-0.69351	6	snx9	nm_016224
chr16	55504466	55505091	+	44	6	55504736	0.222961	1.56332	7.7432	8.08389	7.69286	0.356145	3.84339	4.01276	3.84579	0.694577	4.43051	3.73207	3.42212	0.380428	5.20073	0.574215	0.636335	0.564806	-0.436334	-0.37412	-0.435436	-0.231243	-0.478738	-0.603825	-1.00708	6	mmp2	nm_004530
chr9	129948233	129949056	+	65	6	129948718	0.318515	2.04434	7.26424	7.221	6.9016	0.332402	5.37022	5.85347	5.0557	0.416746	5.6552	4.69965	5.18206	0.276675	5.91146	0.297297	0.288684	0.223416	-0.138533	-0.0142217	-0.225604	-0.0639361	-0.330962	-0.189988	-0.395919	6	angptl2	nm_012098
chr1	95249007	95249547	+	44	4	95249278	0.318515	1.44306	1.99567	2.13451	2.24192	0.166201	1.79007	1.95116	1.77165	0.416746	1.33275	1.6587	1.1733	0.415012	1.7833	0.16232	0.259352	0.330182	0.00546665	0.129778	-0.00945506	-0.420142	-0.104501	-0.603984	-0.208688	6	linc01057	nr_104131
chr6	16761249	16761746	+	32	2	16761543	0.127406	0.962043	2.43472	2.36158	2.90131	0.094972	2.00067	1.36213	1.33954	0.162068	1.51286	1.56655	1.59699	0.103753	1.89737	0.359751	0.315753	0.612701	0.0764815	-0.478139	-0.502261	-0.326727	-0.276413	-0.248649	-0.730708	6	atxn1	nm_000332
chr11	115493714	115494176	+	33	5	115493903	0.254812	1.11236	0.558787	0.817472	0.967103	0.332402	0.421194	0.552214	0.345689	0.555662	0.432245	0.46075	0.358507	0.449597	0.545996	0.0334101	0.582279	0.82478	-0.374405	0.016339	-0.659416	-0.337041	-0.244907	-0.606886	-0.819317	6	cadm1	nm_014333
chr9	16627788	16628543	+	186	10	16628155	0.509625	5.71213	5.069	5.49523	5.05531	0.356145	3.26425	2.577	3.71615	0.347289	3.49398	3.54777	3.94358	0.657103	4.01803	0.335213	0.45169	0.331311	-0.299736	-0.640796	-0.112678	-0.201618	-0.179575	-0.0269818	-0.723808	6	bnc2	nm_017637
chr18	6741203	6741701	+	42	6	6741464	0.318515	1.38294	3.03342	2.63408	2.32984	0.284916	0.842388	1.25169	1.33954	0.393594	0.684387	0.691124	0.847381	0.345844	1.51709	0.999634	0.795987	0.61892	-0.848754	-0.277438	-0.179568	-1.14843	-1.13429	-0.840227	-1.2401	6	arhgap28	nm_001010000
chr12	52279727	52280120	+	23	3	52279983	0.191109	0.811724	1.87593	2.13451	2.19796	0.617318	1.31623	1.47257	1.72844	0.671425	1.83704	1.70477	1.1733	0.760856	1.71564	0.128859	0.315158	0.357419	-0.382334	-0.220409	0.0107271	0.0986363	-0.00916658	-0.548178	-0.464484	6	ankrd33	nm_001130015
chr8	38483554	38484210	+	88	7	38483876	0.350367	2.79594	3.39264	4.49609	3.5607	0.213687	3.00101	2.3193	2.3334	0.370441	1.51286	2.0273	1.5318	0.345844	2.68612	0.336883	0.743148	0.406635	0.159922	-0.211835	-0.203092	-0.82825	-0.405966	-0.810292	-0.580557	6	rnf5p1	nr_003129
chr2	12246364	12246911	+	44	5	12246639	0.222961	1.38294	1.7961	2.13451	1.62649	0.546089	1.10563	1.10443	1.33954	0.578815	0.93653	0.783274	1.10811	0.311259	1.32607	0.437713	0.686748	0.294606	-0.262283	-0.263856	0.0145851	-0.501759	-0.759567	-0.25905	-0.64354	6	ac096559,1	nr_110198
chr11	61772783	61773235	+	28	3	61772986	0.222961	1.05223	4.90935	4.13277	4.13217	0.332402	3.84339	4.01276	3.15441	0.393594	2.73755	2.62627	2.73769	0.449597	3.58737	0.452603	0.204182	0.20397	0.0994529	0.161666	-0.185558	-0.390043	-0.449911	-0.389967	-0.261732	6	fth1	nm_002032
chr6	106043990	106044576	+	54	8	106044248	0.254812	1.71364	0.997835	1.31704	1.09898	0.189944	0.526492	0.736286	1.03707	0.231526	0.90051	0.552899	0.684423	0.311259	0.872392	0.193824	0.594248	0.333117	-0.728564	-0.244711	0.249459	0.0457649	-0.65796	-0.350088	-0.615002	6	prep	nm_002726
chr13	75344311	75344951	+	81	10	75344630	0.41407	2.67568	4.86943	4.45068	4.08821	0.118715	2.79041	2.50337	2.80872	0.416746	2.34133	2.90272	3.58507	0.207506	3.3711	0.530532	0.400804	0.278247	-0.272745	-0.429349	-0.263308	-0.525896	-0.215815	0.0887817	-0.724995	6	linc00347	nr_034025
chr2	28325243	28325801	+	75	11	28325516	0.159258	2.43517	7.02476	8.62887	7.25327	0.213687	3.84339	3.20284	4.23469	0.0926103	4.03428	4.51535	4.10654	0.518765	5.20489	0.432581	0.729304	0.478765	-0.437486	-0.700514	-0.297612	-0.367555	-0.205031	-0.341944	-1.02542	6	mir4263	nr_036230
chr1	12203863	12204201	+	31	4	12204012	0.191109	1.11236	5.02909	5.35898	4.43988	0.641061	2.73776	3.49736	3.1112	0.416746	2.84561	2.44197	2.90065	0.276675	3.59583	0.48397	0.575633	0.304195	-0.39333	-0.0400609	-0.208856	-0.337588	-0.558279	-0.309949	-0.668681	6	mir7846	nr_107000
chr11	123108974	123109701	+	64	8	123109373	0.41407	1.98421	1.87593	2.54325	1.67045	0.47486	1.52683	1.2885	1.29633	0.601967	0.97255	1.843	0.847381	0.415012	1.54047	0.284236	0.723302	0.116868	-0.0128317	-0.257676	-0.248933	-0.663524	0.258686	-0.862286	-0.547949	6	clmp	nm_024769
chr2	47082177	47082905	+	75	8	47082464	0.222961	2.37504	8.0625	8.40179	7.73682	0.284916	3.3169	4.19683	4.79643	0.393594	4.10632	4.33105	3.55248	0.207506	5.38901	0.581206	0.640676	0.52172	-0.700185	-0.360722	-0.16806	-0.392174	-0.315306	-0.601194	-0.990856	6	linc01119	nr_024452
chr5	139493228	139493814	+	41	2	139493572	0.191109	1.32281	2.91368	2.86115	3.64862	0.23743	1.57948	2.09841	2.50624	0.254678	1.69296	1.38225	1.82513	0.345844	2.27866	0.354657	0.328412	0.679165	-0.528737	-0.118884	0.137343	-0.428638	-0.721167	-0.320185	-0.624171	6	pura	nm_005859
chr22	25371696	25372376	+	52	6	25372115	0.254812	1.65351	4.82952	5.08649	5.31907	0.546089	4.36989	4.45453	4.06184	0.370441	2.62949	3.36347	3.22657	0.311259	4.14898	0.219121	0.293912	0.358415	0.0748375	0.102515	-0.0306239	-0.657976	-0.302807	-0.362758	-0.241573	6	tmem211	nm_001001663
chr8	128864051	128864784	+	80	11	128864416	0.445922	2.52536	6.42606	6.26728	6.33013	0.213687	5.15963	4.49134	5.01249	0.578815	4.89877	5.06825	4.2695	0.55335	5.32483	0.271199	0.235106	0.2495	-0.0454682	-0.245587	-0.087208	-0.120314	-0.0712482	-0.318668	-0.378023	6	pvt1	nr_003367
chr1	49344062	49344590	+	67	11	49344337	0.445922	2.25479	3.07333	2.17992	2.76943	0.094972	2.21127	1.25169	1.46918	0.254678	1.87306	1.75085	1.5644	0.207506	2.0159	0.608377	0.112852	0.458164	0.133448	-0.687553	-0.456417	-0.106029	-0.203372	-0.36582	-0.729972	6	bend5	nm_024603
chr20	46644666	46645158	+	32	3	46644924	0.254812	1.26268	3.91151	3.81487	3.3409	0.379888	2.26392	2.46656	2.46303	0.601967	1.36877	1.98122	1.5644	0.518765	2.57502	0.603143	0.567049	0.375653	-0.185763	-0.0620848	-0.0641482	-0.911699	-0.378192	-0.718978	-0.61928	6	rp11-347d21,3	nr_110027
chr2	69469642	69470366	+	92	6	69470026	0.477773	2.79594	1.07766	1.72577	1.53857	0.569832	0.947686	0.736286	0.7778	0.463052	0.396224	0.46075	0.977748	0.207506	0.959833	0.167048	0.846387	0.680737	-0.0183746	-0.382518	-0.303385	-1.27647	-1.0588	0.0266781	-0.799483	6	mir3126	nr_036073
chr21	36935983	36936706	+	85	12	36936322	0.350367	2.73581	6.02692	6.94851	5.84658	0.23743	4.84373	4.30727	4.6668	0.416746	4.25041	3.77815	3.55248	0.311259	4.91343	0.294692	0.499974	0.250862	-0.0206112	-0.189955	-0.0742966	-0.209129	-0.379051	-0.467902	-0.443464	6	loc100506403	nr_073512
chr2	218868623	218869162	+	36	2	218868904	0.191109	1.26268	2.19524	2.27075	2.02212	0.522346	1.42153	1.43576	1.81487	0.208373	0.864489	0.737199	1.01034	0.207506	1.53026	0.520604	0.5694	0.402099	-0.106328	-0.0919602	0.246091	-0.823852	-1.05365	-0.598932	-0.481434	6	rufy4	nr_034176
chr16	64474224	64474819	+	61	9	64474532	0.350367	2.04434	5.86727	5.35898	4.79156	0.213687	3.3169	3.8655	3.75937	0.254678	2.59347	3.96245	3.45471	0.172922	4.1078	0.514323	0.383593	0.222128	-0.308529	-0.0877105	-0.127877	-0.663483	-0.0519744	-0.249802	-0.548054	6	cdh11	nm_001797
chr9	95268441	95269037	+	47	6	95268802	0.350367	1.56332	10.1779	10.173	8.65997	0.189944	7.89739	6.40569	7.43231	0.231526	6.66377	6.35834	6.74646	0.172922	7.83498	0.37744	0.376741	0.144432	0.0114456	-0.290576	-0.0761192	-0.233591	-0.301278	-0.215799	-0.417954	6	mir4670	nr_039817
chr1	172328011	172328682	+	41	3	172328492	0.286664	1.35287	4.19091	4.95025	4.43988	0.166201	1.89537	2.35611	3.19762	0.324136	3.02571	2.9488	2.54214	0.103753	3.28298	0.352257	0.592495	0.435516	-0.792523	-0.478595	-0.0380058	-0.11773	-0.154878	-0.368959	-0.896464	6	c1orf105	nm_139240
chr1	212091101	212091552	+	44	7	212091377	0.254812	1.59338	2.11541	1.40787	1.27482	0.332402	0.947686	0.993986	0.907433	0.532509	0.432245	0.737199	0.782198	0.276675	1.06654	0.988002	0.400577	0.257355	-0.170454	-0.101638	-0.233072	-1.30302	-0.532809	-0.447329	-0.717033	6	lpgat1	nm_014873
chr2	224330412	224330979	+	54	8	224330680	0.350367	1.80383	2.19524	1.4987	1.80233	0.403631	1.05298	1.06761	0.950644	0.347289	1.33275	0.967574	0.945156	0.449597	1.31255	0.741999	0.191333	0.457484	-0.317893	-0.297987	-0.4654	0.0220336	-0.439933	-0.473753	-0.824032	6	scg2	nm_003469
chr9	132672802	132673300	+	31	3	132673099	0.222961	1.0823	3.55229	3.49696	2.76943	0.593575	1.79007	1.32531	1.85808	0.370441	1.83704	1.61262	1.9555	0.138337	2.24415	0.662584	0.639936	0.303423	-0.326147	-0.759831	-0.272356	-0.288783	-0.476757	-0.198632	-0.988093	6	mir6855	nr_106914
chr9	16335801	16336292	+	39	5	16336050	0.191109	1.26268	4.35056	5.22274	4.48384	0.427374	3.2116	2.72426	2.3334	0.486204	1.765	2.25767	1.59699	0.518765	3.10512	0.486553	0.750158	0.530087	0.048646	-0.188785	-0.412215	-0.81498	-0.459811	-0.959294	-0.773051	6	c9orf92	nr_073471
chr6	4358749	4359424	+	60	9	4359047	0.41407	1.89402	3.91151	3.67862	4.35196	0.166201	2.57981	2.72426	2.3334	0.439899	2.62949	2.71842	2.99843	0.380428	3.10288	0.334119	0.245559	0.488059	-0.266341	-0.187744	-0.411174	-0.238825	-0.190837	-0.0494016	-0.644332	6	rp3-400b16,1	nr_103764
chr2	145274902	145275551	+	50	3	145275272	0.127406	1.62345	6.74536	5.99479	6.41805	0.213687	4.36989	5.154	5.14212	0.162068	4.46653	4.65357	4.59541	0.172922	5.28219	0.352759	0.182573	0.280998	-0.273541	-0.0354438	-0.0387732	-0.241983	-0.182798	-0.200942	-0.388029	6	zeb2-as1	nr_040248
chr9	114812771	114813356	+	71	9	114813104	0.318515	2.52536	8.26207	9.35551	8.0885	0.308659	4.36989	4.8963	5.09891	0.694577	5.04285	4.14675	3.8784	0.415012	5.90435	0.484725	0.664037	0.454093	-0.434183	-0.270087	-0.21159	-0.227538	-0.509799	-0.606318	-0.839572	6	mir4668	nr_039814
chr5	90607247	90608450	+	122	11	90607666	0.318515	3.54753	5.10891	5.90396	5.45094	0.261173	3.36955	3.90231	3.889	0.439899	3.8902	4.56142	3.58507	0.449597	4.40682	0.213279	0.421946	0.306768	-0.387182	-0.175408	-0.180339	-0.179893	0.0497452	-0.297735	-0.56164	6	lucat1	nr_103549
chr10	33562102	33562681	+	47	5	33562385	0.318515	1.62345	7.42389	7.94764	6.28617	0.284916	4.89638	5.74303	5.35818	0.486204	4.03428	5.25254	5.37761	0.345844	5.8133	0.352817	0.451169	0.112823	-0.247643	-0.0175461	-0.117616	-0.527046	-0.146341	-0.112392	-0.433205	6	nrp1	nm_003873
chr14	103533809	103534161	+	23	0	103534046	0.0955546	0.691469	4.59004	4.54151	4.22009	0.308659	3.15895	2.79789	3.62973	0.324136	2.62949	2.67235	2.57474	0.55335	3.42386	0.422881	0.407546	0.301647	-0.116178	-0.291288	0.0842375	-0.380843	-0.357518	-0.411201	-0.485101	6	cdc42bpb	nm_006035
chr5	55193722	55194121	+	31	4	55193868	0.159258	0.992107	1.91584	1.90743	1.1869	0.23743	0.737089	0.552214	0.950644	0.370441	0.792449	0.691124	0.651832	0.172922	1.04284	0.877466	0.87112	0.186684	-0.500602	-0.917213	-0.133536	-0.396124	-0.593496	-0.677941	-1.16221	6	il31ra	nm_001242639
chr10	75666454	75667151	+	60	9	75666671	0.286664	1.86396	10.3775	12.035	10.2865	0.522346	7.52884	8.06233	6.78414	0.71773	5.97938	5.98974	6.06204	0.622518	8.12282	0.353403	0.567183	0.340693	-0.109554	-0.0107846	-0.259815	-0.441984	-0.439487	-0.422179	-0.547144	6	plau	nm_001145031
chr5	176972421	176972990	+	42	3	176972773	0.318515	1.56332	6.5458	6.04021	6.15429	0.261173	4.47519	4.04957	4.23469	0.439899	3.3499	3.8703	3.25916	0.345844	4.66434	0.488895	0.372924	0.399919	-0.0597266	-0.203905	-0.139419	-0.477558	-0.26923	-0.517174	-0.554929	6	fam193b	nm_001190946
chr15	38421651	38422305	+	56	3	38422068	0.286664	1.86396	2.31498	2.58866	1.93421	0.118715	1.36888	1.32531	1.33954	0.324136	1.26071	2.0273	1.40144	0.242091	1.729	0.421057	0.582265	0.1618	-0.336945	-0.383606	-0.368199	-0.4557	0.229617	-0.303032	-0.751291	6	spred1	nm_152594
chr11	95245243	95246178	+	84	10	95245510	0.350367	2.52536	3.75186	3.54238	3.07715	0.308659	2.52716	2.577	2.67909	0.416746	2.05316	3.22525	2.24882	0.449597	2.85354	0.394852	0.311965	0.10884	-0.175234	-0.14706	-0.091011	-0.474905	0.176657	-0.343585	-0.409654	6	fam76b	nm_144664
chr8	23202888	23203250	+	31	5	23203088	0.159258	1.05223	5.22865	5.76772	3.91237	0.23743	2.31657	3.0924	2.76551	0.300984	3.31388	3.1331	2.93324	0.55335	3.60705	0.535621	0.677182	0.117224	-0.638831	-0.222092	-0.383273	-0.122299	-0.203229	-0.298322	-0.858074	6	loc100507156	nr_038323
chr12	108765384	108766305	+	132	10	108765708	0.382219	3.96843	3.79177	4.45068	4.17613	0.142458	3.00101	1.98797	3.19762	0.300984	2.37735	2.11945	2.83547	0.345844	3.10416	0.288669	0.519823	0.427962	-0.0487564	-0.642906	0.0427961	-0.384851	-0.550514	-0.130616	-0.62844	6	cmklr1	nm_004072
chr6	160122530	160123041	+	34	5	160122830	0.191109	1.23262	5.82735	5.44981	5.80262	0.427374	4.26459	4.08639	4.71001	0.347289	4.10632	3.63992	4.2695	0.345844	4.68406	0.315083	0.218448	0.308945	-0.135352	-0.196933	0.00797131	-0.189911	-0.363851	-0.133692	-0.38893	6	sod2	nm_001024465
chr10	30971265	30971657	+	22	3	30971492	0.159258	0.841788	2.15532	1.68036	1.53857	0.403631	1.05298	1.10443	1.33954	0.162068	0.93653	1.42832	1.04293	0.380428	1.36433	0.659708	0.300573	0.173397	-0.373711	-0.304895	-0.0264539	-0.542798	0.0661272	-0.387552	-0.612913	6	svilp1	nr_036438
chr9	133656251	133656963	+	72	10	133656726	0.350367	2.31492	6.5458	6.22187	6.02241	0.261173	4.10664	4.34409	5.18533	0.138915	3.78214	3.91637	4.04136	0.242091	4.90733	0.415629	0.342408	0.295402	-0.256981	-0.175887	0.0794967	-0.375736	-0.325422	-0.2801	-0.468937	6	abl1	nm_005157
chr7	33782955	33783682	+	63	8	33783325	0.445922	2.13453	5.90718	7.31183	6.24221	0.569832	5.15963	4.74904	5.27175	0.324136	4.21439	5.52899	4.23691	0.276675	5.40244	0.12886	0.436622	0.208446	-0.066344	-0.185973	-0.0353274	-0.358288	0.0334069	-0.350599	-0.353858	6	bmper	nm_133468
chr21	46783916	46784315	+	22	1	46784145	0.159258	0.841788	6.74536	5.49523	7.12139	0.569832	3.15895	4.49134	4.2779	0.601967	4.21439	4.00852	4.49764	0.242091	4.89008	0.464038	0.168321	0.542301	-0.630411	-0.122711	-0.192956	-0.214536	-0.286788	-0.12069	-0.706913	6	linc00316	nr_103811
chr7	73265168	73265618	+	33	5	73265380	0.222961	1.17249	8.22216	8.58345	7.82474	0.332402	5.52817	5.96392	4.96928	0.62512	5.90734	5.80544	4.98651	0.172922	6.42122	0.356669	0.41871	0.285195	-0.216046	-0.106589	-0.369813	-0.120339	-0.145442	-0.364817	-0.58434	6	wbscr27	nm_152559
chrx	150994497	150995104	+	64	5	150994805	0.127406	2.04434	1.39697	1.18079	1.4067	0.261173	0.895037	0.846729	0.7778	0.300984	0.720408	0.737199	0.81479	0.172922	0.975158	0.518592	0.276048	0.528602	-0.123688	-0.203736	-0.326237	-0.436822	-0.403581	-0.259208	-0.658968	6	magea4	nm_001011548
chr18	59400636	59401076	+	35	5	59400850	0.254812	1.32281	1.07766	0.862887	1.09898	0.427374	0.526492	0.957172	0.691377	0.439899	0.684387	0.598974	0.554057	0.657103	0.783554	0.459799	0.139138	0.488061	-0.573621	0.288744	-0.18056	-0.19522	-0.387539	-0.499999	-0.517478	6	rp11-1096d5,1	nr_103449
chr12	91534018	91534702	+	110	11	91534348	0.254812	3.72792	4.35056	5.08649	4.43988	0.213687	3.6328	3.49736	3.41368	0.324136	3.09775	3.8703	3.38953	0.345844	3.86426	0.171009	0.396479	0.200329	-0.0891112	-0.143927	-0.178866	-0.31897	0.00225194	-0.189109	-0.39324	6	lum	nm_002345
chr5	157811816	157812500	+	68	7	157812139	0.318515	2.22472	5.62779	6.40353	5.40698	0.213687	2.79041	3.79187	3.24083	0.463052	3.60204	4.10067	3.81322	0.311259	4.30859	0.385351	0.57165	0.327607	-0.62674	-0.184307	-0.410853	-0.258403	-0.0713569	-0.176209	-0.835503	6	loc101927697	nr_109888
chr9	111774742	111775042	+	37	6	111774806	0.127406	1.413	5.30848	5.94938	6.9016	0.284916	4.58048	3.97594	4.45074	0.439899	3.78214	3.22525	3.81322	0.311259	4.66525	0.186345	0.350785	0.564977	-0.0264538	-0.230656	-0.0679076	-0.302751	-0.532544	-0.290945	-0.475708	6	ctnnal1	nm_001286974
chr2	238131944	238132401	+	69	8	238132173	0.254812	2.40511	4.66987	5.58606	4.17613	0.308659	2.36922	2.0616	2.07413	0.254678	1.08061	2.07337	1.62958	0.55335	2.85784	0.708456	0.966905	0.54724	-0.270516	-0.471161	-0.462417	-1.40308	-0.462946	-0.810426	-1.14223	6	cops8	nm_006710
chr4	81018877	81019346	+	32	5	81019138	0.222961	1.05223	2.35489	2.63408	1.97816	0.284916	1.26358	1.36213	1.46918	0.486204	1.69296	1.42832	1.33626	0.415012	1.72439	0.449569	0.611206	0.198072	-0.448571	-0.340227	-0.231082	-0.0265439	-0.271767	-0.367895	-0.759576	6	antxr2	nm_001286780
chr10	122856364	122856990	+	55	9	122856719	0.382219	1.80383	3.23298	3.26989	2.19796	0.284916	1.73742	1.91434	2.11734	0.254678	1.69296	1.33617	1.59699	0.345844	2.12178	0.607588	0.623962	0.0508874	-0.288328	-0.148429	-0.00302299	-0.325732	-0.667171	-0.409925	-0.574073	6	wdr11-as1	nr_033850
chr14	35119971	35120458	+	32	4	35120245	0.254812	1.02217	4.23082	5.44981	4.61572	0.356145	3.26425	3.79187	3.06799	0.347289	3.09775	3.1331	2.93324	0.207506	3.73162	0.181136	0.546405	0.306754	-0.193048	0.0231093	-0.282508	-0.268579	-0.252212	-0.347304	-0.495581	6	snx6	nm_152233
chr12	108699918	108700349	+	31	4	108700142	0.350367	1.47313	8.42172	8.58345	7.82474	0.522346	5.26492	5.63259	4.62359	0.393594	5.72724	6.35834	5.47539	0.345844	6.43467	0.388251	0.415693	0.282178	-0.289453	-0.192068	-0.476853	-0.168025	-0.0172141	-0.232904	-0.681498	6	cmklr1	nm_001142345
chr2	110369319	110369865	+	50	7	110369621	0.0955546	1.56332	2.23515	2.04368	1.84629	0.356145	1.21093	1.61983	0.950644	0.439899	1.00857	1.52047	1.66217	0.345844	1.56642	0.512905	0.383702	0.23716	-0.371348	0.0483747	-0.72049	-0.635154	-0.042946	0.0856022	-0.725743	6	2010-09-01	nr_047585
chr12	680557	681256	+	43	7	680822	0.318515	1.35287	8.86077	8.67428	7.42911	0.261173	6.89705	6.36887	6.87056	0.300984	5.33102	6.35834	5.83389	0.311259	6.95821	0.348716	0.318028	0.0944725	-0.0127372	-0.127679	-0.0182881	-0.384306	-0.130066	-0.254257	-0.30664	6	ninj2	nm_016533
chr15	70766920	70767674	+	75	5	70767363	0.41407	2.4953	6.18657	7.26642	6.19825	0.213687	3.68545	3.6078	4.19148	0.324136	3.56602	3.36347	3.84581	0.138337	4.65681	0.4098	0.641903	0.41252	-0.337502	-0.368221	-0.151883	-0.385027	-0.46939	-0.276054	-0.773943	6	uaca	nm_001008224
chr1	244599069	244599444	+	24	3	244599250	0.191109	0.841788	3.83169	4.58692	3.78049	0.47486	2.68511	2.42974	2.41982	0.277831	2.66551	2.5802	2.24882	0.242091	3.02537	0.340869	0.600417	0.321464	-0.172128	-0.316306	-0.32221	-0.182699	-0.229629	-0.427942	-0.691132	6	adss	nm_001126
chr21	34191953	34192376	+	41	6	34192172	0.318515	1.47313	1.63645	1.72577	1.27482	0.332402	0.789739	0.809914	0.950644	0.300984	1.11663	0.552899	0.977748	0.345844	1.09274	0.582625	0.6593	0.222347	-0.468497	-0.432102	-0.200967	0.0312101	-0.982855	-0.16041	-0.855279	6	c21orf62	nm_001162495
chr8	123011920	123012520	+	51	6	123012196	0.254812	1.68358	2.51454	2.54325	2.19796	0.356145	1.21093	1.2885	0.907433	0.324136	0.93653	1.38225	0.879973	0.311259	1.54015	0.707224	0.723598	0.513093	-0.346954	-0.25738	-0.76321	-0.717675	-0.156055	-0.807542	-1.10382	6	has2	nm_005328
chr17	76338915	76339590	+	61	8	76339290	0.477773	1.95415	7.66337	7.8114	7.82474	0.308659	4.89638	5.154	4.79643	0.231526	5.15092	4.9761	5.50798	0.311259	5.9757	0.358871	0.386473	0.388935	-0.287393	-0.213415	-0.317147	-0.214279	-0.264094	-0.117585	-0.650744	6	socs3	nm_003955
chr2	238036934	238037478	+	55	9	238037190	0.382219	1.83389	3.95143	3.54238	3.16506	0.403631	2.68511	2.17204	2.16055	0.463052	1.11663	1.70477	1.1733	0.311259	2.40792	0.714586	0.556931	0.394447	0.157194	-0.148735	-0.156386	-1.10863	-0.498207	-1.03722	-0.60463	6	cops8	nm_006710
chr5	17302711	17303051	+	38	6	17302829	0.159258	1.56332	1.31714	1.18079	1.53857	0.356145	1.00034	1.14124	1.12349	0.439899	0.756428	1.1058	0.81479	0.657103	1.10873	0.2485	0.0908444	0.472682	-0.148427	0.041695	0.0190742	-0.551636	-0.003822	-0.444411	-0.299895	6	loc401177	nr_033975
chr1	95205211	95205792	+	59	6	95205516	0.41407	1.89402	0.997835	0.908302	0.791266	0.498603	0.631791	0.736286	0.604955	0.439899	0.612347	0.598974	0.391099	0.311259	0.696984	0.517676	0.382047	0.183038	-0.141678	0.0791407	-0.204297	-0.186777	-0.218631	-0.833591	-0.449865	6	linc01057	nr_104131
chr3	57014918	57015229	+	36	6	57015090	0.254812	1.413	3.2729	3.40613	3.20902	0.308659	1.79007	1.58301	1.9445	0.439899	1.54888	1.93515	1.9229	0.55335	2.29029	0.515041	0.572607	0.486607	-0.355508	-0.532853	-0.236129	-0.564305	-0.243083	-0.252241	-0.899582	6	arhgef3-as1	nr_046572
chr1	8107615	8108204	+	58	9	8107916	0.254812	1.95415	4.4703	4.45068	5.45094	0.332402	3.26425	3.16603	3.67294	0.463052	3.53	3.82422	3.35693	0.518765	3.90959	0.193355	0.187009	0.479489	-0.260264	-0.304342	-0.0900804	-0.14735	-0.0318509	-0.219873	-0.504846	6	errfi1	nm_018948
chr2	177355835	177356709	+	81	9	177356234	0.477773	2.46524	3.35272	4.08736	3.64862	0.094972	2.47451	2.17204	2.11734	0.347289	2.26928	1.6587	1.82513	0.380428	2.62286	0.354195	0.64003	0.47621	-0.0839938	-0.272086	-0.308884	-0.208902	-0.661087	-0.523141	-0.711799	6	mir1246	nr_031648
chr14	81867013	81867727	+	91	9	81867393	0.222961	3.06651	5.30848	5.67689	4.43988	0.308659	4.36989	3.68143	3.889	0.277831	3.7101	4.2389	3.58507	0.172922	4.32218	0.296539	0.39334	0.0387614	0.0158362	-0.231494	-0.152361	-0.220302	-0.0280711	-0.269756	-0.365553	6	ston2	nm_033104
chr2	118979516	118980051	+	49	5	118979785	0.445922	1.89402	0.518874	0.408736	0.439592	0.356145	0.263246	0.184071	0.3889	0.208373	0.288163	0.3686	0.260733	0.55335	0.346768	0.581412	0.237197	0.342194	-0.39756	-0.913706	0.165426	-0.267087	0.0880825	-0.411401	-0.768881	6	insig2	nm_016133
chr9	116383688	116384140	+	36	6	116383938	0.127406	1.38294	12.892	13.9878	12.968	0.356145	8.42388	6.51613	8.03726	0.62512	7.31214	7.87882	7.10497	0.311259	9.45789	0.446888	0.564583	0.455362	-0.167034	-0.537504	-0.234814	-0.371225	-0.26354	-0.412691	-0.802062	6	rgs3	nm_001276262
chr5	176973166	176973745	+	46	7	176973520	0.318515	1.83389	6.50588	5.90396	6.02241	0.261173	5.26492	5.37489	4.62359	0.62512	3.99826	4.46927	3.61767	0.415012	5.08676	0.354997	0.214936	0.243594	0.0496651	0.0794868	-0.137735	-0.347374	-0.186708	-0.491688	-0.274037	6	fam193b	nm_001190946
chr1	206674725	206675256	+	38	5	206675024	0.222961	1.14243	1.7961	1.90743	1.75837	0.213687	1.31623	1.25169	1.29633	0.277831	1.33275	1.75085	1.43403	0.449597	1.5382	0.223628	0.310391	0.192996	-0.224829	-0.297369	-0.246806	-0.206831	0.186812	-0.101167	-0.498673	5	rassf5	nm_182663
chr8	104356903	104357534	+	57	9	104357193	0.222961	1.77377	5.22865	5.54064	4.83551	0.308659	4.58048	4.08639	3.97542	0.347289	5.94336	6.81909	4.92133	0.345844	5.10343	0.0349718	0.118585	-0.0777984	-0.155968	-0.320642	-0.36036	0.219812	0.418112	-0.0524195	-0.304243	5	cthrc1	nm_138455
chr11	86448664	86449286	+	69	8	86448987	0.445922	2.28485	4.4703	3.3153	3.51674	0.427374	2.42186	2.87151	3.19762	0.416746	3.02571	3.45562	4.20432	0.345844	3.38655	0.400553	-0.0306778	0.0544196	-0.4837	-0.238006	-0.0828192	-0.162543	0.0291271	0.312053	-0.409607	5	prss23	nm_007173
chr13	23952080	23952652	+	39	5	23952426	0.127406	1.26268	4.39047	4.2236	3.86841	0.379888	3.00101	2.65063	2.03092	0.254678	3.24183	3.91637	3.06361	0.449597	3.37632	0.378926	0.323024	0.196291	-0.170004	-0.349116	-0.733316	-0.0586401	0.214067	-0.140218	-0.716892	5	sacs	nm_001278055
chr4	159731876	159732419	+	41	3	159732104	0.286664	1.47313	3.91151	4.08736	3.78049	0.213687	3.89604	3.0924	4.01863	0.300984	4.64663	4.10067	4.53023	0.345844	4.00711	-0.034835	0.0286075	-0.083987	-0.0405516	-0.373834	0.00414299	0.213623	0.0332986	0.177023	-0.106676	5	fnip2	nm_020840
chr13	46928749	46929377	+	58	4	46929108	0.318515	1.77377	3.99134	4.35985	3.82445	0.332402	3.7381	3.57099	2.85193	0.439899	4.93479	4.69965	4.39986	0.276675	4.04122	-0.0179173	0.109488	-0.0795369	-0.112486	-0.178467	-0.50285	0.2882	0.217762	0.122669	-0.268613	5	kiaa0226l	nm_001286763
chr6	147235609	147236414	+	113	10	147236090	0.318515	3.63773	11.2556	10.8542	11.1217	0.356145	6.52851	6.36887	6.48166	0.254678	8.71693	9.49144	9.2886	0.311259	8.90083	0.338628	0.286242	0.321363	-0.447187	-0.482902	-0.457576	-0.0301194	0.092687	0.0615215	-0.777966	5	katnbl1p6	nr_003954
chr12	66042746	66043276	+	60	6	66043070	0.254812	1.86396	3.03342	3.3153	3.07715	0.189944	3.05366	2.94514	2.76551	0.254678	3.96224	3.73207	4.69319	0.207506	3.39752	-0.163538	-0.0353416	-0.142889	-0.153944	-0.206144	-0.296936	0.221835	0.135495	0.466087	-0.105085	5	hmga2	nm_003483
chr5	169547551	169548045	+	33	5	169547892	0.222961	1.23262	7.94276	8.1293	6.98952	0.546089	6.15996	5.81666	6.04955	0.509357	6.87989	6.81909	6.9746	0.657103	6.86237	0.210934	0.244424	0.0264854	-0.155786	-0.238517	-0.181879	0.00367916	-0.00912724	0.0234033	-0.352675	5	foxi1	nm_144769
chr6	141647545	141648040	+	36	6	141647791	0.159258	1.38294	2.31498	1.54411	1.45065	0.284916	1.42153	1.39894	1.85808	0.208373	1.80102	1.98122	2.7051	0.207506	1.83063	0.33866	-0.245559	-0.335634	-0.364894	-0.388	0.0214729	-0.0235237	0.114054	0.563346	-0.162963	5	mir4465	nr_039675
chr2	33377883	33378559	+	139	9	33378200	0.41407	4.35926	4.15099	3.95111	3.73653	0.356145	3.00101	3.20284	3.5001	0.231526	4.86275	5.71329	5.0191	0.242091	4.12642	0.00856714	-0.0626298	-0.143189	-0.459443	-0.365536	-0.237494	0.236884	0.469434	0.282541	-0.288407	5	ltbp1	nm_000627
chr3	112390800	112391326	+	53	7	112390972	0.286664	1.71364	7.66337	8.90136	7.47307	0.23743	7.58149	7.14197	7.51873	0.439899	7.49224	9.44537	8.34345	0.380428	7.95123	-0.0531985	0.162848	-0.0894769	-0.0686961	-0.154855	-0.0806885	-0.0857803	0.248429	0.069466	-0.108137	5	ccdc80	nm_199512
chr11	35604501	35605128	+	122	5	35604814	0.286664	3.81811	2.71411	2.58866	2.59359	0.213687	2.42186	1.87753	1.77165	0.115763	2.73755	2.67235	3.29175	0.242091	2.51878	0.107752	0.0394781	0.042225	-0.0566094	-0.423893	-0.50763	0.120157	0.0853799	0.386127	-0.392529	5	fjx1	nm_014344
chr22	28261930	28262567	+	77	8	28262216	0.350367	2.79594	3.11324	3.76945	3.78049	0.118715	2.73776	3.3501	2.85193	0.300984	3.85418	4.10067	3.68285	0.172922	3.47119	-0.15701	0.118926	0.123145	-0.342433	-0.0512248	-0.28349	0.150995	0.240431	0.0853933	-0.254069	5	pitpnb	nm_001284278
chr1	67029737	67030564	+	134	12	67030135	0.541476	4.29913	5.98701	5.35898	5.40698	0.403631	5.79142	4.6386	4.58038	0.324136	7.27612	9.35322	8.11531	0.207506	6.27867	-0.0686232	-0.2285	-0.215634	-0.116542	-0.436769	-0.454992	0.212711	0.575004	0.370187	-0.165182	5	sgip1	nm_032291
chr7	104992416	104992908	+	32	5	104992733	0.254812	1.05223	4.15099	4.26902	3.95633	0.284916	2.73776	3.97594	3.54331	0.370441	2.91765	4.74572	3.68285	0.242091	3.77551	0.136785	0.177234	0.0674918	-0.463675	0.0746263	-0.0915734	-0.371863	0.329956	-0.0358484	-0.287378	5	srpk2	nm_182692
chr7	100760632	100761166	+	42	6	100760868	0.191109	1.38294	6.2664	6.26728	6.06637	0.379888	3.84339	4.8963	4.45074	0.324136	5.6552	6.26619	6.61609	0.415012	5.592	0.164273	0.164476	0.11747	-0.540983	-0.191672	-0.329318	0.0162144	0.164226	0.242616	-0.502731	5	serpine1	nm_000602
chr3	177185981	177186597	+	71	7	177186240	0.509625	2.22472	3.63212	3.40613	3.47278	0.213687	2.52716	3.38691	4.06184	0.277831	3.92622	4.46927	3.4873	0.276675	3.59664	0.0141622	-0.0785145	-0.0505586	-0.50913	-0.0866773	0.175485	0.126493	0.31339	-0.0445385	-0.101804	5	linc00578	nr_047568
chr6	57178453	57178976	+	60	7	57178763	0.41407	1.92409	9.61913	9.26468	8.92372	0.23743	8.58183	9.05632	7.34589	0.300984	9.22122	11.058	9.94043	0.172922	9.22347	0.0605968	0.00643204	-0.0476635	-0.104024	-0.0263848	-0.328373	-0.000351544	0.261708	0.108	-0.159382	5	prim2	nm_001282488
chr1	183911930	183912501	+	44	6	183912154	0.254812	1.413	1.91584	2.45242	1.93421	0.403631	1.73742	1.8039	2.11734	0.486204	2.41337	1.98122	2.24882	0.207506	2.06717	-0.109679	0.246545	-0.0959166	-0.250707	-0.196538	0.0345975	0.223389	-0.0612665	0.12151	-0.151199	5	colgalt2	nm_015101
chr3	101659264	101659862	+	49	6	101659544	0.222961	1.65351	5.90718	6.04021	5.27511	0.142458	3.58015	3.71824	3.80258	0.370441	4.68265	4.74572	5.24725	0.103753	4.77768	0.306161	0.338289	0.142891	-0.41629	-0.361688	-0.329332	-0.0289836	-0.00968178	0.135252	-0.63155	5	loc152225	nr_026934
chr2	182931349	182931929	+	54	7	182931646	0.318515	1.7437	1.07766	1.54411	1.05502	0.142458	0.895037	0.920357	1.03707	0.347289	1.33275	1.52047	0.717015	0.172922	1.12217	-0.0583829	0.460492	-0.0890148	-0.326268	-0.286021	-0.113779	0.248124	0.438234	-0.646212	-0.346387	5	ppp1r1c	nm_001261425
chr4	74974621	74975211	+	55	7	74974950	0.254812	2.10447	5.6677	5.90396	6.19825	0.213687	4.84373	5.63259	4.6668	0.347289	5.18694	5.66722	5.54057	0.172922	5.47864	0.048946	0.107866	0.178043	-0.177699	0.03998	-0.231385	-0.0789351	0.0488235	0.0162169	-0.234653	5	cxcl2	nm_002089
chr12	27338303	27338883	+	81	10	27338649	0.318515	2.826	7.62346	7.72057	7.03348	0.379888	6.68645	6.84746	7.12983	0.277831	8.35673	9.53752	7.69162	0.207506	7.62523	-0.000336163	0.0179252	-0.116544	-0.18954	-0.155213	-0.0969138	0.132157	0.322832	0.0125051	-0.114237	5	stk38l	nm_015000
chr6	122253728	122254176	+	45	6	122253899	0.254812	1.62345	4.43039	4.67775	3.95633	0.284916	3.4222	2.61381	2.76551	0.208373	4.14234	4.19282	3.74803	0.345844	3.77213	0.232052	0.310436	0.0687823	-0.140456	-0.529224	-0.447835	0.135067	0.152541	-0.00924683	-0.576262	5	hsf2	nm_001243094
chr2	12674733	12675462	+	52	8	12675224	0.350367	1.68358	4.51021	5.90396	4.35196	0.142458	4.89638	3.57099	4.88285	0.208373	5.11489	6.35834	4.72578	0.242091	4.92393	-0.126615	0.261873	-0.178144	-0.00809524	-0.463488	-0.012086	0.0548942	0.368841	-0.0592578	-0.146928	5	trib2	nr_027303
chr15	85455529	85455926	+	33	5	85455624	0.191109	1.14243	4.11108	4.72317	4.7476	0.261173	3.79074	3.57099	3.32725	0.208373	3.53	4.2389	4.07395	0.484181	4.01263	0.0349688	0.235207	0.242649	-0.0820668	-0.168226	-0.270216	-0.184881	0.0791403	0.0218796	-0.344445	5	slc28a1	nm_201651
chr20	52259043	52260099	+	63	7	52259902	0.191109	1.86396	4.98917	4.814	4.83551	0.308659	3.47485	3.6078	4.19148	0.555662	3.67408	3.54777	4.75837	0.518765	4.21034	0.244865	0.1933	0.199733	-0.276985	-0.222816	-0.00647749	-0.196553	-0.247023	0.176532	-0.381393	5	znf217	nm_006526
chr20	48925060	48926051	+	114	7	48925494	0.382219	3.42728	3.23298	4.04194	3.29694	0.308659	3.4222	2.79789	2.93835	0.231526	3.63806	4.14675	3.68285	0.55335	3.46644	-0.100589	0.221594	-0.0723267	-0.0185308	-0.309118	-0.238447	0.069714	0.258525	0.0873675	-0.204925	5	rp11-290f20,2	nr_109950
chr19	16389929	16390432	+	71	6	16390134	0.127406	2.22472	0.518874	0.681226	0.659388	0.356145	0.737089	0.404957	0.172844	0.555662	0.432245	0.552899	0.586649	0.518765	0.527352	-0.0233833	0.369367	0.322361	0.483072	-0.380998	-1.60929	-0.286919	0.0682496	0.153729	-0.725188	5	klf2	nm_016270
chr6	131227740	131228386	+	65	10	131228040	0.254812	2.01428	1.39697	0.862887	1.23086	0.261173	0.631791	0.920357	0.950644	0.254678	1.04459	1.52047	1.36885	0.207506	1.10305	0.340806	-0.35425	0.158171	-0.803975	-0.261228	-0.214516	-0.0785549	0.463027	0.311468	-0.474815	5	smlr1	nm_001195597
chr11	19940594	19941175	+	41	6	19940884	0.318515	1.29275	7.4638	8.03847	6.33013	0.617318	5.15963	5.33807	4.92606	0.393594	5.94336	7.78667	6.84423	0.449597	6.4256	0.216079	0.323089	-0.0215973	-0.316566	-0.267513	-0.383396	-0.112552	0.277174	0.0910571	-0.495015	5	nav2	nm_001111019
chr20	45582807	45583578	+	100	10	45583194	0.350367	3.1567	4.90935	4.17819	4.26404	0.308659	3.47485	2.79789	3.889	0.393594	3.27786	3.40955	3.61767	0.276675	3.7576	0.38572	0.153067	0.182412	-0.11286	-0.425474	0.0495879	-0.197059	-0.140231	-0.0547513	-0.403315	5	eya2	nm_172110
chr5	133774749	133775240	+	50	8	133774972	0.382219	1.71364	8.42172	8.53804	7.78078	0.546089	6.89705	9.09313	7.56194	0.463052	10.6981	10.8276	10.0056	0.484181	8.86933	-0.0747091	-0.0549202	-0.18891	-0.362845	0.0359521	-0.230068	0.270452	0.287819	0.173914	-0.0794742	5	loc102546229	nr_105044
chr9	133722577	133723409	+	59	5	133722993	0.127406	1.83389	5.6677	5.17732	4.96739	0.166201	4.26459	4.82267	4.49395	0.463052	5.18694	4.69965	4.82356	0.242091	4.90042	0.209859	0.0793009	0.0195837	-0.200498	-0.0230722	-0.12492	0.0819776	-0.060353	-0.022808	-0.219078	5	abl1	nm_005157
chr2	135018101	135018844	+	69	5	135018466	0.350367	2.19466	3.23298	4.35985	4.7476	0.593575	4.10664	3.71824	3.58652	0.393594	4.61061	5.66722	4.49764	0.242091	4.28081	-0.405018	0.026394	0.149313	-0.0599256	-0.203263	-0.255299	0.107073	0.404757	0.0712837	-0.0963924	5	mgat5	nm_002410
chr15	70722506	70722806	+	42	7	70722558	0.350367	1.53326	0.35922	0.544981	0.615429	0.284916	0.315895	0.331329	0.302478	0.509357	0.468265	0.552899	0.358507	0.345844	0.427667	-0.251619	0.349718	0.525104	-0.437041	-0.368226	-0.49966	0.130837	0.370529	-0.254485	-0.64271	5	uaca	nm_001008224
chr13	52217111	52218523	+	152	14	52217567	0.254812	4.35926	5.82735	6.90309	5.40698	0.23743	4.73843	4.93311	4.92606	0.486204	4.93479	5.85152	4.85615	0.207506	5.37528	0.116502	0.360904	0.00848472	-0.18193	-0.12384	-0.125904	-0.12335	0.122472	-0.146527	-0.305855	5	wdfy2	nm_052950
chr4	185574713	185575264	+	42	6	185575007	0.350367	1.50319	3.79177	3.22447	3.03319	0.332402	2.52716	2.50337	2.46303	0.347289	3.31388	3.17917	3.51989	0.345844	3.06177	0.308506	0.0746966	-0.0135322	-0.276847	-0.290494	-0.313931	0.114153	0.0542848	0.201165	-0.416981	5	primpol	nm_152683
chr6	119862153	119862757	+	59	7	119862460	0.191109	1.89402	1.55662	1.90743	2.02212	0.356145	1.63213	1.65664	1.51239	0.416746	1.65694	1.93515	1.85772	0.345844	1.74857	-0.167758	0.125456	0.209695	-0.0994242	-0.0779141	-0.209348	-0.0776574	0.146267	0.0873567	-0.184693	5	loc285762	nr_046100
chr13	20993870	20994476	+	62	10	20994154	0.127406	1.92409	1.63645	1.72577	2.24192	0.284916	1.21093	1.61983	1.72844	0.324136	1.90908	2.11945	1.79254	0.311259	1.77605	-0.1181	-0.0414257	0.336066	-0.552551	-0.132828	-0.0391953	0.104209	0.25502	0.0133343	-0.300371	5	mir4499	nr_039721
chr2	101358526	101359790	+	113	11	101359042	0.286664	3.2469	6.94493	6.58519	6.33013	0.308659	6.31791	6.07436	6.74093	0.300984	8.57285	8.93854	8.37604	0.276675	7.20899	-0.0538364	-0.130572	-0.187562	-0.190349	-0.247064	-0.0968486	0.249979	0.310243	0.216472	-0.0540976	5	npas2	nm_002518
chr10	60384622	60385451	+	120	9	60385107	0.127406	3.60766	3.63212	3.81487	3.82445	0.23743	2.42186	2.42974	2.7223	0.393594	4.82673	4.69965	3.29175	0.276675	3.51816	0.0459885	0.116811	0.120431	-0.538704	-0.534019	-0.369997	0.456224	0.417729	-0.0959676	-0.575317	5	fam133cp	nr_027508
chr3	28417686	28418329	+	51	4	28418036	0.159258	1.56332	2.03558	1.13538	1.01106	0.379888	1.10563	1.10443	1.12349	0.300984	1.44082	1.75085	1.01034	0.311259	1.30195	0.644765	-0.197505	-0.364806	-0.235803	-0.237377	-0.212692	0.146208	0.427377	-0.365837	-0.256109	5	zcwpw2	nm_001040432
chr3	124771326	124771826	+	50	8	124771586	0.127406	1.80383	4.86943	5.7223	4.79156	0.379888	4.00134	3.93913	4.32111	0.463052	3.96224	5.98974	5.4102	0.276675	4.77856	0.0271772	0.260019	0.00391729	-0.256093	-0.2787	-0.145175	-0.270259	0.325918	0.179106	-0.323694	5	heg1	nm_020733
chr9	111798328	111798740	+	29	3	111798532	0.127406	0.992107	3.47246	3.76945	2.46172	0.356145	2.42186	2.46656	2.11734	0.254678	2.08918	2.44197	2.99843	0.311259	2.69322	0.366628	0.485023	-0.129668	-0.153214	-0.126833	-0.347077	-0.366394	-0.141285	0.154873	-0.449702	5	mir32	nr_029506
chr8	59636502	59637201	+	47	8	59636982	0.350367	1.47313	2.91368	3.54238	2.81339	0.213687	2.21127	2.42974	2.07413	0.277831	2.19724	2.81057	2.73769	0.207506	2.63668	0.14412	0.425997	0.0935885	-0.253847	-0.117917	-0.346213	-0.263026	0.0921428	0.0542398	-0.460561	5	nsmaf	nm_003580
chr5	138180653	138181194	+	34	5	138180900	0.222961	1.23262	5.38831	5.08649	4.43988	0.284916	3.68545	2.8347	4.14826	0.277831	3.8902	5.16039	4.33468	0.380428	4.32982	0.315525	0.232364	0.0362144	-0.232467	-0.61111	-0.0617986	-0.154462	0.253175	0.00161932	-0.496493	5	ctnna1	nm_001290312
chr6	152467386	152468058	+	87	9	152467714	0.541476	2.70575	1.75619	1.18079	1.23086	0.641061	1.47418	0.957172	0.821011	0.486204	1.5849	1.93515	1.9555	0.380428	1.43286	0.29355	-0.279142	-0.219233	0.0410135	-0.582048	-0.803425	0.145491	0.433546	0.448636	-0.379878	5	esr1	nm_000125
chr20	17824001	17824589	+	44	7	17824382	0.382219	1.53326	6.30632	7.13017	6.54992	0.379888	5.52817	4.78586	5.09891	0.347289	6.23153	6.31227	6.15981	0.55335	6.01144	0.0690869	0.246226	0.123768	-0.120908	-0.328933	-0.237522	0.0518753	0.0704482	0.0351756	-0.375481	5	snord17	nr_003045
chr8	69671817	69672551	+	109	9	69672206	0.382219	3.30702	7.1445	8.58345	8.04454	0.23743	6.00201	5.9271	7.25946	0.254678	7.31214	8.29349	7.59384	0.415012	7.35117	-0.0411417	0.223584	0.130035	-0.292528	-0.310647	-0.018111	-0.00768057	0.174006	0.0468557	-0.311255	5	rp11-600k15,1	nr_039986
chr2	159992111	159993072	+	148	10	159992651	0.445922	4.44945	6.82519	6.13104	6.06637	0.23743	5.26492	4.93311	5.18533	0.324136	6.84387	7.00339	5.67094	0.138337	5.99157	0.187934	0.0331961	0.0178988	-0.186523	-0.280436	-0.208499	0.191878	0.225119	-0.0793482	-0.304829	5	mir6888	nr_106948
chr12	66025321	66025976	+	73	7	66025614	0.254812	2.43517	6.38614	7.35725	6.94556	0.284916	4.05399	4.45453	4.10505	0.393594	6.05143	6.31227	6.15981	0.138337	5.75845	0.149265	0.353486	0.270411	-0.506337	-0.370407	-0.488279	0.0715952	0.132479	0.0972062	-0.712728	5	hmga2	nm_003483
chr2	204608015	204608807	+	76	7	204608414	0.509625	2.34498	4.27073	4.63234	3.78049	0.569832	3.5275	3.27647	3.75937	0.370441	4.10632	3.91637	3.51989	0.380428	3.8655	0.143829	0.261087	-0.0320802	-0.132009	-0.238511	-0.0401655	0.087193	0.018863	-0.135124	-0.261174	5	cd28	nm_001243078
chr7	80351951	80352638	+	54	9	80352373	0.286664	1.89402	9.10025	8.49262	8.87976	0.142458	6.89705	6.84746	7.12983	0.254678	8.06857	7.60237	6.29018	0.276675	7.7009	0.24088	0.141183	0.205494	-0.159047	-0.169458	-0.111159	0.0672856	-0.018578	-0.291926	-0.342407	5	cd36	nm_001289908
chr5	41871930	41872427	+	59	7	41872182	0.254812	1.95415	0.399134	0.817472	0.57147	0.189944	0.368545	0.294514	0.691377	0.393594	0.468265	0.3686	0.61924	0.345844	0.510957	-0.35633	0.677966	0.161474	-0.471364	-0.794865	0.436271	-0.125878	-0.471148	0.277296	-0.437689	5	oxct1	nm_000436
chr9	21549161	21550020	+	86	14	21549449	0.286664	2.61555	3.43255	4.40526	3.47278	0.118715	3.00101	3.05559	3.32725	0.0926103	3.38592	4.10067	3.35693	0.172922	3.50422	-0.0298113	0.330136	-0.0130022	-0.223646	-0.197643	-0.0747605	-0.0495462	0.226767	-0.0619485	-0.261124	5	mir31hg	nr_027054
chrx	148544213	148544769	+	43	5	148544509	0.254812	1.35287	1.4768	0.635811	1.4067	0.189944	0.631791	0.625843	0.734589	0.300984	0.756428	1.38225	1.01034	0.242091	0.962282	0.617938	-0.597861	0.547778	-0.607013	-0.620659	-0.389524	-0.347257	0.522485	0.0703078	-0.72835	5	ids	nm_001166550
chr3	36435695	36436001	+	36	6	36435844	0.286664	1.35287	0.918008	1.40787	1.09898	0.498603	1.10563	0.993986	0.864222	0.231526	1.51286	1.33617	0.977748	0.484181	1.13505	-0.306181	0.310753	-0.0465937	-0.0378857	-0.191462	-0.393286	0.414515	0.235348	-0.215225	-0.193537	5	stac	nm_003149
chr18	43382642	43383603	+	173	6	43383255	0.350367	5.20105	12.9319	13.4883	10.4183	0.23743	10.056	10.308	9.98176	0.347289	12.4631	13.6382	12.1893	0.242091	11.7194	0.142037	0.202805	-0.169777	-0.220845	-0.185137	-0.231535	0.0887559	0.21875	0.0567082	-0.270861	5	siglec15	nm_213602
chr1	200384823	200385655	+	103	7	200385220	0.382219	3.1567	5.42822	4.814	4.5278	0.308659	3.4222	3.8655	3.15441	0.300984	4.53857	5.11432	6.15981	0.311259	4.55831	0.251979	0.0787357	-0.00969032	-0.413576	-0.237845	-0.53113	-0.00626303	0.166042	0.434385	-0.501192	5	znf281	nm_001281294
chr12	1567064	1567471	+	27	2	1567369	0.127406	0.931979	5.38831	5.22274	5.27511	0.23743	4.10664	5.00674	4.79643	0.393594	5.4751	5.11432	5.60575	0.415012	5.11013	0.0764731	0.0314468	0.0458412	-0.3154	-0.0294864	-0.0913976	0.0995261	0.00118347	0.133549	-0.196682	5	linc00942	nr_028415
chr6	42489712	42490224	+	40	6	42489952	0.318515	1.413	2.63428	2.67949	1.93421	0.356145	2.00067	2.54019	2.59267	0.486204	2.95367	3.73207	2.86806	0.587934	2.65948	-0.0137327	0.0108155	-0.459402	-0.410659	-0.0662091	-0.0367072	0.151366	0.488833	0.108932	-0.0170855	5	ubr2	nm_001184801
chr10	81914940	81915546	+	58	7	81915325	0.445922	1.89402	5.18874	6.35811	6.11033	0.47486	4.58048	6.25843	4.40753	0.416746	5.94336	6.58872	6.09463	0.207506	5.72559	-0.142041	0.151174	0.0938255	-0.321925	0.128375	-0.377454	0.0538545	0.202573	0.0901128	-0.224654	5	plac9	nm_001012973
chr3	81793451	81794004	+	45	5	81793711	0.318515	1.53326	4.55013	5.08649	4.43988	0.166201	3.7381	4.30727	3.54331	0.324136	4.10632	4.93002	4.88874	0.345844	4.39892	0.0487579	0.209522	0.0133725	-0.234845	-0.0303741	-0.312051	-0.0993011	0.164445	0.152314	-0.282974	5	gbe1	nm_000158
chr2	216545733	216546226	+	47	7	216545963	0.286664	1.65351	6.42606	6.13104	6.24221	0.261173	4.05399	4.74904	3.75937	0.393594	4.86275	6.77302	6.1924	0.311259	5.46554	0.233569	0.165767	0.191692	-0.431022	-0.202728	-0.539875	-0.168591	0.309434	0.180135	-0.588218	5	linc00607	nr_037195
chr16	16090358	16090997	+	47	3	16090738	0.191109	1.50319	3.39264	4.08736	2.98923	0.284916	3.26425	3.68143	2.80872	0.463052	3.53	3.686	4.13913	0.484181	3.50875	-0.0485498	0.220212	-0.231185	-0.104205	0.0693086	-0.321044	0.00871008	0.0710974	0.238371	-0.0988056	5	abcc1	nm_004996
chr17	62675787	62676326	+	51	8	62675996	0.254812	1.71364	6.74536	6.94851	6.50596	0.094972	5.21227	4.1232	4.2779	0.300984	5.25898	6.22012	5.83389	0.138337	5.68069	0.24783	0.290638	0.195697	-0.124153	-0.462301	-0.409164	-0.111284	0.130876	0.0383934	-0.576594	5	smurf2	nm_022739
chr12	66285661	66286379	+	134	11	66286016	0.254812	4.29913	7.22432	6.22187	7.6489	0.379888	5.79142	7.14197	7.08662	0.324136	7.6003	8.01704	7.52866	0.415012	7.14012	0.0169135	-0.198601	0.0993042	-0.302033	0.000373694	-0.0108513	0.0901078	0.167121	0.0764437	-0.076709	5	rpsap52	nr_026825
chr9	22211628	22212184	+	40	6	22211905	0.350367	1.44306	4.86943	4.85942	4.65968	0.189944	3.79074	2.87151	3.84579	0.324136	3.99826	4.00852	4.07395	0.345844	4.10859	0.245111	0.24214	0.181587	-0.116162	-0.516831	-0.0953642	-0.0392698	-0.0355731	-0.0122154	-0.465731	5	cdkn2b	nm_004936
chr5	9479411	9479880	+	36	6	9479692	0.350367	1.47313	1.91584	1.95285	1.36274	0.546089	0.947686	1.69346	1.38275	0.509357	1.98112	2.30375	1.69476	0.380428	1.69277	0.17859	0.206192	-0.312883	-0.836907	0.000583072	-0.291843	0.226929	0.444594	0.00169465	-0.400022	5	ctd-2201e9,1	nr_109935
chr18	42117384	42117972	+	58	5	42117745	0.222961	1.77377	0.478961	0.408736	0.615429	0.023743	0.368545	0.368143	0.3889	0.277831	0.684387	0.414675	0.488874	0.380428	0.468517	0.0318071	-0.196931	0.393493	-0.346261	-0.347834	-0.268701	0.546713	-0.17612	0.0613623	-0.397055	5	loc101927921	nr_110792
chr11	10003673	10004124	+	43	5	10003970	0.159258	1.47313	3.2729	3.63321	3.51674	0.213687	3.6328	2.87151	3.58652	0.370441	4.28643	3.96245	4.2695	0.449597	3.67023	-0.165301	-0.0146256	-0.0616317	-0.0147886	-0.354057	-0.0332845	0.223906	0.110522	0.218197	-0.0535241	5	rp11-540a21,2	nr_033972
chr10	75725877	75726251	+	25	4	75726018	0.127406	0.931979	8.6612	9.12843	7.78078	0.284916	6.89705	6.55294	6.09276	0.601967	7.74438	7.92489	6.94201	0.345844	7.52494	0.202888	0.278687	0.048235	-0.125701	-0.199537	-0.304583	0.0414702	0.0747112	-0.116327	-0.386544	5	vcl	nm_003373
chr20	36904151	36904678	+	54	6	36904396	0.222961	1.71364	4.39047	4.08736	4.308	0.379888	2.21127	2.35611	1.81487	0.300984	4.21439	3.73207	3.16138	0.242091	3.36399	0.384202	0.280995	0.356845	-0.6053	-0.513764	-0.890311	0.325148	0.149802	-0.0896177	-1.01047	5	kiaa1755	nm_001029864
chr16	48110340	48110820	+	39	6	48110587	0.286664	1.38294	5.86727	5.90396	5.09927	0.451117	5.58082	4.82267	5.14212	0.463052	5.69122	6.81909	5.24725	0.311259	5.57485	0.0737552	0.08275	-0.128643	0.00154325	-0.209101	-0.11657	0.0298046	0.290646	-0.0873732	-0.11733	5	abcc12	nm_033226
chr1	183132499	183133001	+	53	7	183132740	0.382219	1.77377	5.42822	4.76859	4.5278	0.284916	4.05399	3.82869	4.10505	0.254678	5.11489	4.93002	5.14947	0.276675	4.6563	0.221295	0.0343765	-0.0403747	-0.199842	-0.282335	-0.181784	0.13552	0.0824088	0.145239	-0.293086	5	lamc2	nm_005562
chr12	109219976	109220810	+	123	12	109220210	0.382219	3.75798	11.0161	12.7616	10.5063	0.261173	9.52951	9.75579	10.5867	0.324136	10.9142	11.2884	10.5923	0.345844	10.7723	0.0322848	0.244486	-0.0360797	-0.176854	-0.142998	-0.0250727	0.0188754	0.0675084	-0.0243167	-0.195205	5	ssh1	nm_001161331
chr22	26155719	26156215	+	30	2	26156088	0.127406	0.931979	2.75402	2.9974	3.20902	0.213687	1.79007	2.46656	2.03092	0.0926103	2.52143	2.34982	2.44437	0.242091	2.50707	0.13554	0.257709	0.356133	-0.485982	-0.0235024	-0.303867	0.0082392	-0.0934494	-0.0365391	-0.520911	5	myo18b	nm_032608
chr12	93293128	93293826	+	62	7	93293396	0.318515	2.01428	7.1445	6.6306	7.03348	0.23743	5.52817	5.154	5.48781	0.162068	5.61918	5.06825	5.54057	0.242091	5.91184	0.273225	0.165533	0.250631	-0.0968051	-0.197914	-0.107377	-0.0732472	-0.222121	-0.0935725	-0.363828	5	eea1	nm_003566
chr10	105032732	105033525	+	61	9	105033057	0.254812	1.86396	1.43688	1.72577	0.879184	0.403631	0.895037	0.846729	1.12349	0.324136	1.08061	1.24402	1.14071	0.242091	1.15249	0.318184	0.582486	-0.39052	-0.364738	-0.444786	-0.0367725	-0.0929096	0.110256	-0.0148312	-0.452149	5	ina	nm_032727
chr4	28289253	28289820	+	45	6	28289541	0.286664	1.53326	4.11108	3.76945	2.54963	0.308659	2.15862	2.577	2.7223	0.347289	2.73755	3.96245	3.91099	0.103753	3.16656	0.376599	0.251437	-0.312627	-0.55281	-0.297225	-0.218093	-0.210033	0.323473	0.304616	-0.461179	5	mir4275	nr_036237
chr9	38025745	38026522	+	67	8	38026114	0.286664	2.13453	5.34839	5.13191	4.65968	0.427374	3.79074	3.68143	3.58652	0.393594	4.97081	5.89759	4.88874	0.276675	4.66176	0.198232	0.138621	-0.000643904	-0.298393	-0.340608	-0.378289	0.092608	0.339253	0.0685882	-0.451166	5	shb	nm_003028
chr16	24657353	24658137	+	125	7	24657738	0.159258	3.81811	3.51238	2.58866	3.1211	0.23743	2.42186	2.8347	2.93835	0.115763	3.13377	3.8703	2.41178	0.276675	2.98143	0.236441	-0.203801	0.0660501	-0.299888	-0.0728104	-0.0209983	0.0718944	0.376437	-0.30591	-0.164129	5	tnrc6a	nm_014494
chr2	46165857	46166426	+	49	7	46166060	0.254812	1.68358	3.67203	3.9057	3.86841	0.593575	2.42186	2.61381	2.37661	0.439899	2.77357	2.99487	2.7051	0.311259	3.03689	0.273986	0.362988	0.349148	-0.326474	-0.216436	-0.353688	-0.130849	-0.0200984	-0.16691	-0.627573	5	prkce	nm_005400
chr2	33294795	33295676	+	92	11	33295138	0.318515	2.85607	4.94926	5.31357	5.89054	0.356145	3.26425	3.27647	3.19762	0.393594	4.64663	4.6075	4.59541	0.242091	4.41569	0.164573	0.26704	0.415759	-0.435888	-0.430497	-0.465641	0.0735445	0.0613425	0.0575547	-0.726466	5	ltbp1	nm_000627
chrx	13505715	13506483	+	49	6	13506044	0.286664	1.47313	6.62562	6.67602	6.19825	0.094972	5.47552	4.45453	5.0557	0.0926103	4.61061	5.02217	5.54057	0.0345844	5.51767	0.263998	0.27493	0.167803	-0.0110619	-0.308785	-0.126148	-0.2591	-0.135747	0.00597649	-0.384242	5	egfl6	nm_015507
chr14	62028363	62028977	+	72	6	62028674	0.286664	2.31492	13.2113	15.6228	13.2317	0.261173	11.3722	11.1179	9.76571	0.416746	10.3739	10.9658	10.7552	0.345844	11.8241	0.160049	0.401926	0.162274	-0.0562111	-0.0888405	-0.27593	-0.188772	-0.108711	-0.136689	-0.381744	5	rp11-47i22,2	nr_110417
chr12	89556351	89556851	+	32	2	89556702	0.286664	1.23262	3.8716	3.72404	3.82445	0.261173	2.73776	3.05559	2.46303	0.277831	3.60204	3.04095	2.44437	0.345844	3.19598	0.276671	0.220609	0.258995	-0.223262	-0.0648093	-0.375823	0.172555	-0.0717378	-0.386796	-0.47339	5	rp11-13a1,1	nr_038385
chr15	51401048	51401942	+	92	11	51401614	0.509625	2.79594	5.069	6.04021	4.92343	0.356145	4.63313	5.52214	4.58038	0.277831	5.33102	7.37199	6.15981	0.172922	5.51457	-0.121547	0.13135	-0.163583	-0.25126	0.0019805	-0.267782	-0.048837	0.418807	0.159638	-0.121094	5	tnfaip8l3	nm_207381
chr8	118893774	118894201	+	40	4	118893970	0.318515	1.44306	2.15532	1.8166	2.63755	0.47486	1.26358	1.5462	1.29633	0.393594	1.62092	1.6587	1.59699	0.449597	1.73247	0.315077	0.0684164	0.606373	-0.455309	-0.1641	-0.418391	-0.0960168	-0.0627759	-0.117474	-0.675889	5	ext1	nm_000127
chr5	121429294	121429933	+	56	9	121429700	0.0318515	1.92409	7.66337	7.53891	7.38515	0.23743	4.79108	6.1848	5.57423	0.231526	7.16806	7.83274	6.87683	0.172922	6.77946	0.176808	0.153184	0.123456	-0.50082	-0.132444	-0.282398	0.0804112	0.208347	0.0205718	-0.45637	5	lox	nm_002317
chr20	48922201	48922798	+	37	6	48922588	0.191109	1.32281	5.82735	5.49523	5.09927	0.522346	3.26425	4.3809	4.2779	0.370441	3.92622	4.65357	4.36727	0.587934	4.588	0.344977	0.260315	0.152426	-0.491112	-0.0666368	-0.100962	-0.224722	0.0204738	-0.0711315	-0.472143	5	rp11-290f20,1	nr_034124
chr11	122057194	122057751	+	63	7	122057470	0.286664	2.10447	6.42606	6.99392	5.89054	0.427374	4.68578	4.56497	3.71615	0.277831	5.4751	5.34469	4.30209	0.518765	5.26659	0.287064	0.409233	0.16153	-0.168579	-0.206263	-0.503059	0.056016	0.0212385	-0.291831	-0.578576	5	mir100hg	nr_024430
chr21	16367758	16368355	+	70	7	16368110	0.509625	2.34498	1.95576	1.86202	1.89025	0.356145	1.36888	1.8039	2.16055	0.162068	1.83704	2.3959	1.89031	0.311259	1.90718	0.0362865	-0.0345721	-0.0128655	-0.478444	-0.0803203	0.179962	-0.054057	0.329126	-0.0128153	-0.12255	5	nrip1	nm_003489
chr2	218723163	218723645	+	35	4	218723447	0.191109	1.32281	2.23515	1.90743	1.71441	0.166201	1.15828	1.14124	1.51239	0.208373	1.36877	1.88907	1.72735	0.0345844	1.62823	0.457063	0.228325	0.0744034	-0.49132	-0.512702	-0.10648	-0.250423	0.21437	0.0852556	-0.623431	5	mir6809	nr_106867
chr3	29805511	29805971	+	33	0	29805773	0.286664	1.23262	1.59654	1.68036	1.97816	0.166201	0.895037	1.39894	1.38275	0.208373	1.11663	1.52047	1.40144	0.207506	1.44115	0.147725	0.22155	0.456944	-0.6872	-0.0428819	-0.0596736	-0.368065	0.0773015	-0.0403109	-0.538658	5	rbms3	nm_014483
chr7	80571428	80571926	+	51	7	80571598	0.254812	1.77377	4.78961	5.44981	5.27511	0.261173	3.6328	4.85949	5.27175	0.324136	6.26755	6.45049	5.70353	0.311259	5.30001	-0.146089	0.04021	-0.0067961	-0.544915	-0.125192	-0.00771345	0.241905	0.283413	0.105858	-0.188382	5	sema3c	nm_006379
chr12	102250750	102251320	+	46	7	102251032	0.222961	1.47313	3.35272	4.13277	3.03319	0.593575	2.10597	2.13523	1.51239	0.416746	3.38592	3.5017	2.80288	0.207506	2.88475	0.216887	0.518663	0.0723872	-0.453962	-0.434056	-0.931618	0.231099	0.279607	-0.0415386	-0.875858	5	dram1	nm_018370
chr18	53500579	53501208	+	49	8	53500870	0.382219	1.56332	3.83169	5.04108	3.38486	0.403631	2.31657	3.05559	2.76551	0.347289	2.95367	3.63992	3.16138	0.449597	3.35003	0.193805	0.589558	0.0149226	-0.532186	-0.132724	-0.276628	-0.181664	0.119734	-0.0836172	-0.579941	5	rp11-214l13,1	nr_110755
chrx	13416403	13416952	+	34	3	13416660	0.159258	1.0823	3.79177	3.58779	3.69257	0.071229	2.73776	2.17204	2.7223	0.0694577	3.63806	4.4232	3.61767	0.138337	3.37591	0.167597	0.0878214	0.129352	-0.302279	-0.636222	-0.31045	0.107894	0.389814	0.0997843	-0.544574	5	linc01203	nr_045260
chr7	80263686	80264333	+	120	8	80264042	0.382219	3.75798	2.63428	1.68036	1.75837	0.332402	1.57948	1.50939	1.85808	0.254678	1.80102	2.53412	2.21623	0.276675	1.95237	0.432185	-0.216457	-0.150988	-0.305779	-0.371264	-0.0714155	-0.116412	0.376261	0.182881	-0.271066	5	cd36	nm_000072
chr2	208378530	208379051	+	47	8	208378853	0.318515	1.50319	6.74536	6.58519	5.89054	0.189944	5.37022	4.30727	5.22854	0.277831	4.93479	5.80544	7.00719	0.207506	5.76384	0.226866	0.192195	0.0313687	-0.102048	-0.420256	-0.140621	-0.22404	0.0103764	0.281806	-0.371118	5	creb1	nm_134442
chr8	38264056	38264659	+	56	7	38264384	0.350367	1.83389	7.7432	7.62974	7.25327	0.427374	4.84373	5.74303	5.87671	0.370441	7.85244	8.89247	8.27826	0.276675	7.12365	0.120313	0.0990166	0.0260153	-0.556498	-0.310805	-0.277608	0.140525	0.319967	0.216712	-0.463419	5	letm2	nm_001199660
chrx	13450421	13451089	+	77	8	13450714	0.0637031	2.40511	4.98917	4.45068	3.29694	0.094972	2.00067	2.42974	2.54945	0.0926103	2.66551	3.5017	3.38953	0.276675	3.2526	0.617208	0.452432	0.0195352	-0.701109	-0.420789	-0.351405	-0.287182	0.106461	0.0594902	-0.854159	5	linc01203	nr_045260
chr9	99257621	99258021	+	25	2	99257790	0.0637031	0.841788	0.878095	1.13538	1.31878	0.498603	0.737089	0.883543	0.950644	0.370441	1.00857	1.05972	0.651832	0.484181	0.958183	-0.125926	0.244798	0.460826	-0.378463	-0.117002	-0.0113967	0.0739386	0.145315	-0.555802	-0.362187	5	habp4	nm_014282
chr16	29955362	29955751	+	58	10	29955536	0.445922	1.98421	8.22216	9.49176	7.47307	0.403631	5.42287	6.1848	5.66065	0.532509	6.98796	6.68087	5.57316	0.726272	6.85525	0.262307	0.469465	0.12449	-0.338153	-0.148483	-0.276242	0.0276601	-0.0371746	-0.298714	-0.539713	5	tmem219	nm_194280
chr10	99408701	99409056	+	27	4	99408944	0.222961	0.901915	7.4638	6.13104	6.19825	0.498603	3.6328	3.53417	3.06799	0.277831	5.8353	5.66722	4.79096	0.276675	5.14684	0.536225	0.252445	0.268175	-0.502605	-0.542314	-0.746393	0.181121	0.138955	-0.10337	-0.949386	5	pi4k2a	nm_018425
chr4	157397499	157397898	+	37	6	157397602	0.0955546	1.29275	6.78528	6.76685	6.41805	0.189944	4.63313	3.82869	3.62973	0.231526	4.53857	5.52899	5.73612	0.207506	5.31838	0.351421	0.347498	0.271148	-0.198998	-0.474137	-0.551123	-0.228749	0.0560307	0.109089	-0.731442	5	pdgfc	nm_016205
chr5	158181050	158181376	+	38	6	158181371	0.286664	1.47313	6.06683	6.17645	5.14323	0.284916	4.26459	5.37489	4.53716	0.0694577	4.28643	5.16039	4.98651	0.242091	5.11072	0.247417	0.273252	0.00914746	-0.26112	0.0727074	-0.171736	-0.253752	0.0139546	-0.0354955	-0.296655	5	loc101927697	nr_109888
chr1	218550535	218551033	+	33	4	218550808	0.0955546	1.02217	3.75186	3.76945	3.07715	0.284916	2.31657	2.68744	2.03092	0.486204	3.13377	2.71842	2.57474	0.657103	2.89559	0.373748	0.380497	0.0877348	-0.32187	-0.107624	-0.511723	0.114043	-0.0910882	-0.169434	-0.594399	5	rp11-224o19,2	nr_046268
chr2	153288603	153289245	+	99	11	153288926	0.382219	3.03645	2.91368	2.63408	2.32984	0.284916	2.10597	1.87753	1.72844	0.463052	1.90908	2.3959	2.37919	0.449597	2.25263	0.371229	0.225684	0.0486177	-0.0971278	-0.262777	-0.382139	-0.238734	0.0889539	0.0788558	-0.462525	5	fmnl2	nm_052905
chr8	96805091	96805787	+	71	11	96805442	0.350367	2.43517	6.18657	5.44981	4.87947	0.284916	3.36955	2.577	2.98157	0.254678	4.25041	4.28497	5.31243	0.242091	4.36575	0.50291	0.319976	0.160495	-0.373674	-0.760538	-0.550161	-0.0386302	-0.0269453	0.283141	-0.889251	5	loc100500773	nr_036611
chr9	102827047	102827599	+	45	4	102827341	0.159258	1.47313	0.399134	0.454151	0.175837	0.403631	0.157948	0.441771	0.172844	0.393594	0.180102	0.3686	0.358507	0.380428	0.300988	0.407165	0.593465	-0.77547	-0.93026	0.553593	-0.800234	-0.740894	0.292347	0.252296	-0.467354	5	erp44	nm_015051
chr7	34135771	34136394	+	53	8	34136158	0.382219	1.68358	2.35489	2.9974	2.85735	0.213687	2.15862	2.0616	1.90129	0.463052	2.37735	2.81057	2.11845	0.276675	2.40417	-0.0298783	0.318172	0.24914	-0.155429	-0.221773	-0.338561	-0.0161862	0.225326	-0.182526	-0.417732	5	bmper	nm_133468
chr6	86162234	86162677	+	34	5	86162524	0.254812	1.35287	2.83385	2.90657	2.94527	0.451117	1.89537	2.3193	1.72844	0.370441	1.90908	2.34982	2.96583	0.380428	2.42817	0.222894	0.259446	0.278529	-0.357389	-0.0661804	-0.490396	-0.346992	-0.0473181	0.288568	-0.558278	5	nt5e	nm_001204813
chr12	2448153	2448654	+	38	4	2448442	0.286664	1.44306	2.31498	3.17906	2.63755	0.379888	1.21093	1.32531	1.90129	0.486204	1.54888	2.16552	2.63992	0.587934	2.1026	0.13882	0.596421	0.327023	-0.796059	-0.665843	-0.1452	-0.440955	0.042538	0.328316	-0.889789	5	cacna1c-it3	nr_046769
chr5	111341310	111341610	+	25	4	111341462	0.222961	1.02217	5.70761	6.26728	5.62678	0.118715	3.7381	3.16603	3.24083	0.393594	4.0703	4.9761	5.31243	0.172922	4.67838	0.286877	0.42183	0.266299	-0.323707	-0.563336	-0.529646	-0.200874	0.0890036	0.183361	-0.797232	5	nrep	nm_001142475
chr5	111296140	111296662	+	39	4	111296366	0.318515	1.53326	4.62995	4.31443	4.48384	0.522346	3.6328	4.41771	4.2779	0.254678	6.23153	6.26619	6.71387	0.276675	4.99647	-0.109912	-0.211738	-0.156174	-0.459828	-0.177609	-0.224007	0.318677	0.32668	0.426235	-0.127873	5	nrep	nm_001142475
chr1	41433114	41433920	+	94	5	41433564	0.222961	2.826	6.02692	6.58519	4.79156	0.427374	3.5275	3.42373	3.84579	0.509357	5.76326	5.98974	5.67094	0.311259	5.0694	0.249606	0.377409	-0.0813218	-0.52317	-0.566247	-0.398537	0.18507	0.240679	0.161771	-0.677882	5	ctps1	nm_001905
chr1	201562363	201563062	+	75	9	201562799	0.350367	2.40511	5.70761	5.76772	4.26404	0.451117	4.15929	4.04957	4.40753	0.347289	4.86275	3.91637	5.11688	0.345844	4.69464	0.281873	0.296985	-0.138792	-0.174678	-0.213246	-0.0910441	0.0507582	-0.261497	0.124249	-0.306344	5	nav1	nm_020443
chr10	30093054	30093551	+	67	10	30093164	0.382219	2.37504	3.35272	2.54325	2.90131	0.498603	1.52683	1.58301	1.85808	0.532509	2.01714	2.11945	2.47696	0.345844	2.26431	0.566265	0.167602	0.357635	-0.568531	-0.516394	-0.285258	-0.166756	-0.09538	0.129503	-0.820562	5	svil	nm_003174
chr7	114648495	114649001	+	49	8	114648682	0.382219	1.71364	2.43472	2.95198	2.85735	0.47486	2.42186	2.24567	1.90129	0.416746	2.16122	2.48805	2.44437	0.449597	2.43406	0.000390964	0.278321	0.231315	-0.00724452	-0.116216	-0.356386	-0.171515	0.0316512	0.00609934	-0.329957	5	mdfic	nm_001166346
chr17	61689411	61689975	+	35	4	61689778	0.254812	1.17249	0.399134	0.363321	0.175837	0.451117	0.210597	0.220886	0.0864222	0.324136	0.360204	0.322525	0.391099	0.345844	0.281114	0.505719	0.37009	-0.676916	-0.41667	-0.347854	-1.70168	0.35766	0.198255	0.47638	-0.888365	5	map3k3	nm_203351
chr4	57824283	57824878	+	52	8	57824592	0.41407	1.7437	2.9935	2.45242	3.07715	0.451117	1.73742	1.8039	2.67909	0.370441	2.26928	2.25767	2.41178	0.311259	2.40913	0.31332	0.0256882	0.353078	-0.471565	-0.417395	0.153227	-0.0862776	-0.0936786	0.00158184	-0.47594	5	noa1	nm_032313
chr13	110896435	110896840	+	40	6	110896548	0.350367	1.44306	0.718441	0.681226	0.615429	0.284916	0.789739	0.404957	0.7778	0.532509	0.828469	0.921499	0.749607	0.415012	0.720796	-0.00472195	-0.0814571	-0.227999	0.131784	-0.831822	0.109807	0.200856	0.354391	0.056542	-0.0920178	5	col4a1	nm_001845
chr18	43534288	43534776	+	38	5	43534623	0.254812	1.29275	13.6105	13.0341	13.1438	0.522346	9.16097	10.0503	10.0682	0.648272	12.2469	12.4863	11.0485	0.380428	11.65	0.224391	0.161969	0.174058	-0.346753	-0.213086	-0.210522	0.0720952	0.100022	-0.0764682	-0.443593	5	epg5	nm_020964
chr18	39618856	39619458	+	76	13	39619188	0.318515	2.43517	3.63212	3.86028	3.60466	0.213687	2.21127	1.76709	2.20377	0.463052	2.98969	3.27132	2.96583	0.55335	2.94511	0.302488	0.390383	0.291538	-0.41345	-0.736951	-0.418353	0.0216735	0.15155	0.0101147	-0.851054	5	pik3c3	nm_002647
chr2	235588563	235589128	+	52	8	235588900	0.286664	1.86396	5.069	6.3127	4.22009	0.23743	3.94869	3.31329	3.84579	0.463052	4.61061	4.2389	4.17172	0.518765	4.41453	0.199441	0.515997	-0.064988	-0.160885	-0.413997	-0.198981	0.0626973	-0.0585716	-0.0816166	-0.474771	5	arl4c	nm_001282431
chr3	197093957	197094617	+	49	5	197094164	0.254812	1.65351	3.2729	3.22447	3.1211	0.213687	1.84272	1.69346	1.77165	0.486204	2.98969	3.3174	2.28141	0.415012	2.61276	0.324996	0.30349	0.256484	-0.503733	-0.625601	-0.560475	0.194424	0.344479	-0.195646	-0.85826	5	dlg1	nm_001098424
chr11	85885006	85885926	+	196	16	85885366	0.382219	5.92258	5.90718	5.67689	5.53886	0.142458	4.68578	4.04957	4.06184	0.370441	5.07887	5.57507	5.70353	0.276675	5.14196	0.200153	0.142783	0.107272	-0.134027	-0.344548	-0.340183	-0.0178083	0.116673	0.149538	-0.422989	5	eed	nm_003797
chr2	74793658	74794330	+	71	5	74793942	0.159258	2.22472	5.90718	5.31357	5.27511	0.189944	4.21194	3.42373	4.36432	0.300984	5.69122	7.18769	6.61609	0.242091	5.33232	0.147707	-0.00508197	-0.0155622	-0.340278	-0.639194	-0.289005	0.0939758	0.430766	0.311217	-0.46518	5	dok1	nm_001381
chr18	33058544	33058901	+	42	7	33058737	0.318515	1.50319	6.22649	7.53891	7.34119	0.166201	5.73877	6.11117	6.78414	0.393594	6.77183	7.00339	6.77905	0.0691687	6.69944	-0.105621	0.170315	0.131974	-0.223299	-0.132591	0.0181262	0.0155063	0.064014	0.0170432	-0.178144	5	ino80c	nm_194281
chr12	14480537	14481125	+	35	5	14480879	0.286664	1.23262	4.55013	3.40613	3.82445	0.356145	2.26392	2.42974	2.11734	0.347289	2.77357	3.27132	2.90065	0.415012	3.0597	0.572519	0.154746	0.321865	-0.434567	-0.332584	-0.531133	-0.141644	0.0964857	-0.077011	-0.782471	5	atf7ip	nm_001286514
chr6	75381048	75381939	+	166	10	75381439	0.573328	4.9906	7.10458	6.76685	5.4949	0.284916	5.94936	5.77984	6.17919	0.347289	7.09602	7.14162	8.18049	0.311259	6.63254	0.0991887	0.028923	-0.271467	-0.156826	-0.198531	-0.102144	0.0974481	0.10669	0.302626	-0.104715	5	col12a1	nm_004370
chr4	115193304	115193852	+	35	5	115193570	0.159258	1.11236	5.18874	4.58692	4.5278	0.118715	4.26459	3.6078	3.58652	0.254678	4.82673	6.12797	5.67094	0.172922	4.70978	0.139725	-0.0381322	-0.0568492	-0.143253	-0.38454	-0.393074	0.0353873	0.37975	0.267928	-0.32187	5	arsj	nm_024590
chr21	29814962	29815453	+	54	6	29815164	0.318515	1.95415	4.86943	5.94938	5.45094	0.308659	3.2116	4.19683	4.19148	0.347289	5.33102	4.69965	5.14947	0.415012	4.78331	0.0257443	0.314729	0.188496	-0.574716	-0.18871	-0.190551	0.156401	-0.0254576	0.106415	-0.494316	5	linc00161	nr_026552
chr15	67316543	67317236	+	95	2	67316860	0.509625	3.00638	8.18224	9.21926	7.73682	0.379888	7.21295	7.39967	8.29653	0.416746	9.86959	12.0716	9.09305	0.518765	8.78686	-0.102851	0.0693036	-0.183607	-0.28476	-0.247887	-0.08284	0.167642	0.458202	0.0494168	-0.132777	5	smad3	nm_005902
chr12	50640789	50641357	+	50	1	50641096	0.159258	1.53326	6.58571	6.3127	6.28617	0.284916	4.42254	5.08037	5.01249	0.347289	4.57459	5.06825	5.14947	0.415012	5.38803	0.289581	0.228499	0.222423	-0.284884	-0.0848239	-0.104232	-0.236116	-0.0882718	-0.0653338	-0.404814	5	mir1293	nr_031625
chrx	16856261	16856761	+	43	4	16856546	0.159258	1.59338	0.997835	1.63494	1.23086	0.308659	1.36888	1.14124	1.03707	0.115763	2.01714	2.25767	1.9229	0.207506	1.51206	-0.599643	0.112725	-0.296851	-0.14352	-0.40591	-0.544008	0.415797	0.578321	0.346771	-0.103223	5	rbbp7	nm_001198719
chr2	161244302	161244826	+	50	8	161244562	0.382219	1.89402	5.069	5.7223	4.22009	0.261173	3.79074	3.23966	4.01863	0.439899	3.78214	4.10067	3.71544	0.380428	4.1843	0.276716	0.45161	0.0122868	-0.142504	-0.369144	-0.058281	-0.145782	-0.0291253	-0.171452	-0.436847	5	mir4785	nr_039946
chr4	82527840	82528500	+	59	10	82528133	0.41407	2.10447	3.47246	3.58779	3.42882	0.427374	1.52683	2.46656	2.11734	0.370441	2.59347	4.19282	3.51989	0.484181	2.98955	0.21603	0.263166	0.197782	-0.969393	-0.277431	-0.497675	-0.205048	0.487991	0.235601	-0.807159	5	rasgef1b	nm_152545
chr9	110512947	110513671	+	71	7	110513362	0.286664	2.22472	4.4703	3.72404	4.04425	0.261173	3.15895	2.28249	2.67909	0.162068	2.84561	3.5017	3.32434	0.138337	3.33675	0.421927	0.158424	0.277427	-0.0789972	-0.547838	-0.316702	-0.229706	0.0696099	-0.00537534	-0.600439	5	klf4	nm_004235
chr8	60607080	60607748	+	89	9	60607412	0.222961	2.79594	5.14883	4.85942	4.48384	0.094972	2.79041	3.16603	2.93835	0.162068	4.79071	4.51535	4.59541	0.276675	4.14315	0.313516	0.230055	0.114007	-0.570251	-0.388053	-0.49572	0.209512	0.124108	0.149467	-0.703867	5	tox	nm_014729
chr8	142053362	142053884	+	66	9	142053599	0.318515	2.04434	0.997835	0.999132	0.923144	0.284916	0.526492	0.589029	0.475322	0.370441	0.828469	0.921499	0.586649	0.380428	0.760841	0.391206	0.39308	0.27896	-0.531183	-0.369257	-0.67869	0.122852	0.276388	-0.375099	-0.880792	5	ptk2	nm_001199649
chr16	27248929	27249451	+	44	3	27249206	0.222961	1.50319	2.51454	1.90743	2.32984	0.403631	1.73742	1.95116	1.72844	0.439899	1.5849	1.79692	2.18364	0.587934	1.97048	0.351751	-0.0469122	0.241685	-0.181595	-0.0142152	-0.189072	-0.314156	-0.133017	0.148187	-0.310468	5	flj21408	nr_037184
chr18	32862279	32862776	+	47	8	32862497	0.286664	1.77377	1.31714	1.72577	1.75837	0.308659	1.05298	0.699472	1.46918	0.486204	1.29673	1.843	1.36885	0.311259	1.39239	-0.0801512	0.309681	0.336676	-0.403077	-0.993225	0.0774466	-0.102679	0.404493	-0.0246009	-0.628354	5	zscan30	nm_001112734
chr2	12460913	12461806	+	83	10	12461525	0.350367	2.52536	2.75402	2.407	2.68151	0.356145	1.47418	2.13523	1.20991	0.254678	1.4048	2.34982	2.05327	0.484181	2.05219	0.424374	0.230069	0.38588	-0.477256	0.0572239	-0.762266	-0.546807	0.195385	0.00075663	-0.740874	5	ac096559,1	nr_110198
chr22	44756679	44757351	+	41	2	44757102	0.191109	1.35287	6.8651	8.53804	6.94556	0.166201	5.68612	6.62657	6.04955	0.463052	6.41163	7.09554	6.1924	0.172922	6.71228	0.0324785	0.347102	0.0492876	-0.239359	-0.0185399	-0.149974	-0.0661118	0.0801103	-0.116304	-0.278914	5	kiaa1644	nm_001099294
chr1	236074069	236074651	+	61	10	236074159	0.41407	2.07441	3.43255	3.22447	3.64862	0.379888	3.05366	3.16603	2.89514	0.231526	3.45796	4.33105	3.68285	0.415012	3.43248	3e-05	-0.0901884	0.0880978	-0.168714	-0.116577	-0.245617	0.0106687	0.335464	0.101571	-0.176282	5	lyst	nr_102436
chr17	58547085	58547573	+	64	8	58547302	0.0637031	1.95415	2.51454	2.54325	2.85735	0.284916	1.05298	1.84071	1.03707	0.62512	3.16979	2.48805	2.57474	0.415012	2.23094	0.172643	0.189017	0.357024	-1.08317	-0.277387	-1.10515	0.506736	0.157361	0.206771	-1.06146	5	c17orf64	nm_181707
chr5	36450639	36451271	+	63	8	36450938	0.222961	1.98421	1.87593	1.95285	1.62649	0.379888	2.21127	1.5462	1.42597	0.324136	2.26928	2.25767	2.28141	0.172922	1.93856	-0.0473827	0.0105925	-0.253225	0.189886	-0.326261	-0.443048	0.227249	0.219848	0.234939	-0.0964694	5	ranbp3l	nm_145000
chr3	174157258	174157925	+	60	8	174157640	0.318515	1.89402	7.10458	7.31183	6.94556	0.166201	5.47552	4.85949	4.79643	0.486204	6.59173	6.31227	5.60575	0.172922	6.11146	0.217232	0.258715	0.184573	-0.158522	-0.330714	-0.349556	0.10914	0.046641	-0.124609	-0.499771	5	naaladl2	nm_207015
chr1	21476282	21476748	+	100	12	21476558	0.541476	3.33709	6.14666	5.99479	6.37409	0.213687	4.63313	4.85949	6.13598	0.185221	5.25898	7.37199	5.21465	0.138337	5.77664	0.0895725	0.0534793	0.141988	-0.318243	-0.249427	0.0870621	-0.135449	0.351824	-0.147659	-0.255216	5	eif4g3	nm_001198803
chr1	218669817	218670398	+	44	5	218670108	0.254812	1.38294	1.7961	1.27162	1.71441	0.166201	1.36888	1.50939	1.25312	0.416746	1.36877	1.843	2.37919	0.276675	1.61161	0.156368	-0.341831	0.08921	-0.235506	-0.0945401	-0.362975	-0.235617	0.193553	0.561966	-0.198923	5	rp11-224o19,2	nr_046268
chr9	33946692	33947242	+	39	3	33946976	0.318515	1.32281	3.67203	3.58779	3.69257	0.23743	2.36922	2.02479	2.07413	0.347289	2.37735	2.9488	3.03102	0.345844	2.86419	0.358452	0.32497	0.366501	-0.273717	-0.500357	-0.465618	-0.268775	0.0420003	0.0816761	-0.763205	5	snord121a	nr_003685
chr11	123300583	123301006	+	39	4	123300844	0.127406	1.53326	4.94926	5.49523	5.93449	0.451117	3.84339	3.16603	4.14826	0.370441	4.50255	4.37712	3.65026	0.103753	4.45184	0.15281	0.303776	0.414722	-0.212022	-0.491729	-0.101895	0.0163387	-0.0244209	-0.286405	-0.558985	5	mir4493	nr_039714
chr12	58923590	58924143	+	47	5	58923894	0.0955546	1.65351	4.74969	4.67775	4.92343	0.166201	4.73843	3.82869	4.06184	0.162068	5.51112	4.6075	5.18206	0.345844	4.69784	0.0158381	-0.00617988	0.0676684	0.0124133	-0.295147	-0.209862	0.230349	-0.0280134	0.14153	-0.189974	5	lrig3	nm_001136051
chr9	5627161	5627601	+	44	7	5627374	0.318515	1.38294	3.75186	4.90483	3.25298	0.308659	2.42186	2.76107	2.59267	0.486204	2.84561	3.08702	2.93324	0.518765	3.17235	0.242053	0.628651	0.0362111	-0.389434	-0.200323	-0.291116	-0.156814	-0.0393361	-0.113055	-0.59593	5	kiaa1432	nm_020829
chr6	52459846	52460326	+	32	4	52460196	0.254812	1.32281	9.14017	10.173	9.75895	0.379888	6.8444	7.95189	6.43845	0.463052	7.81642	7.69452	8.73455	0.380428	8.28359	0.141964	0.296414	0.236469	-0.275332	-0.0589592	-0.363542	-0.0837476	-0.106426	0.0764763	-0.45756	5	tram2-as1	nr_103447
chr1	55909090	55909659	+	43	5	55909442	0.191109	1.44306	4.35056	4.72317	4.17613	0.427374	3.05366	3.6078	2.93835	0.277831	3.09775	3.63992	3.42212	0.311259	3.66772	0.246318	0.364873	0.187283	-0.264345	-0.023763	-0.319874	-0.24366	-0.0109752	-0.0999935	-0.468819	5	mir4422	nr_039618
chr1	201735217	201735870	+	56	3	201735482	0.254812	1.80383	5.62779	4.31443	4.83551	0.094972	4.42254	4.30727	4.14826	0.254678	4.46653	5.02217	5.34502	0.172922	4.72106	0.253457	-0.129939	0.0345589	-0.0942366	-0.132336	-0.186602	-0.0799566	0.0892005	0.179085	-0.190417	5	nav1	nm_001167738
chr16	88338110	88338476	+	46	7	88338197	0.254812	1.71364	5.78744	7.49349	5.40698	0.379888	4.42254	6.00073	4.62359	0.347289	6.12347	5.57507	6.12722	0.276675	5.72895	0.0146556	0.387368	-0.0834459	-0.373396	0.0668679	-0.309257	0.0960785	-0.0392802	0.0969624	-0.311454	5	loc101928880	nr_110944
chr8	38517393	38518003	+	111	18	38517674	0.254812	3.39721	4.59004	4.58692	4.308	0.356145	3.15895	3.8655	4.10505	0.416746	3.8902	5.06825	4.62801	0.276675	4.24455	0.112896	0.111916	0.0214086	-0.426164	-0.134956	-0.0482097	-0.125766	0.255875	0.12478	-0.285183	5	rnf5p1	nr_003129
chr11	106269889	106270426	+	55	9	106270087	0.41407	1.89402	7.54363	7.26642	6.02241	0.308659	5.73877	5.48533	5.09891	0.347289	6.44765	7.69452	6.9746	0.276675	6.47469	0.220447	0.166432	-0.10447	-0.174071	-0.239233	-0.344623	-0.00603835	0.249019	0.107299	-0.346779	5	kbtbd3	nm_198439
chr14	69149547	69150119	+	49	6	69149894	0.382219	1.59338	3.91151	5.63147	4.48384	0.142458	3.00101	4.01276	4.23469	0.277831	5.07887	5.62114	5.50798	0.242091	4.60925	-0.236806	0.288979	-0.0397979	-0.619086	-0.199939	-0.122277	0.139976	0.286331	0.25699	-0.317893	5	zfp36l1	nm_004926
chr12	127153135	127153526	+	59	8	127153328	0.350367	2.1646	8.82086	9.76425	7.03348	0.379888	6.15996	5.96392	6.52487	0.370441	7.85244	8.75424	7.56125	0.518765	7.60392	0.214176	0.360766	-0.112505	-0.303822	-0.350483	-0.220793	0.0463988	0.203239	-0.0081185	-0.445845	5	rp11-407a16,3	nr_110036
chr13	101961429	101962052	+	74	10	101961800	0.286664	2.58549	3.99134	4.13277	4.26404	0.071229	3.68545	4.41771	4.01863	0.208373	4.03428	4.69965	5.27984	0.0691687	4.28041	-0.100877	-0.0506396	-0.00552751	-0.215911	0.0455503	-0.0910456	-0.0854375	0.134802	0.302744	-0.0347872	5	nalcn	nm_052867
chr5	111333151	111333798	+	51	8	111333199	0.318515	1.59338	4.90935	5.4044	4.08821	0.094972	2.57981	2.50337	3.06799	0.370441	4.57459	5.80544	5.67094	0.172922	4.28934	0.194774	0.333377	-0.0692885	-0.733491	-0.776884	-0.483464	0.0928853	0.43665	0.40283	-0.817567	5	nrep	nm_001142475
chrx	148535902	148536399	+	31	1	148536175	0.127406	1.11236	1.75619	2.04368	1.1869	0.189944	1.36888	1.21487	1.51239	0.138915	1.26071	1.6587	1.69476	0.172922	1.5219	0.206576	0.425297	-0.358675	-0.152876	-0.325068	-0.00904311	-0.271631	0.12418	0.155212	-0.253395	5	ids	nm_001166550
chr14	32978766	32979481	+	60	4	32979152	0.382219	1.80383	6.06683	4.95025	5.45094	0.23743	4.21194	4.30727	5.14212	0.185221	5.40306	4.83787	5.18206	0.172922	5.06137	0.261416	-0.0320284	0.106977	-0.265044	-0.232754	0.0228349	0.0942478	-0.0651564	0.0339981	-0.270443	5	akap6	nm_004274
chr13	86071682	86072228	+	65	9	86071954	0.254812	2.10447	3.95143	3.63321	3.73653	0.23743	2.05332	2.8347	2.50624	0.231526	2.95367	3.3174	2.86806	0.345844	3.09495	0.352457	0.231327	0.271784	-0.591958	-0.12672	-0.30439	-0.0674071	0.100135	-0.109841	-0.626212	5	linc00351	nr_046989
chr3	171591989	171592669	+	56	7	171592378	0.350367	1.92409	6.74536	6.13104	5.84658	0.23743	5.00168	4.6386	4.62359	0.439899	4.57459	5.94367	4.39986	0.311259	5.32277	0.341718	0.203953	0.135414	-0.0897663	-0.198489	-0.203166	-0.218536	0.159176	-0.274719	-0.390835	5	tmem212	nm_001164436
chr3	39188413	39188974	+	44	4	39188675	0.318515	1.47313	5.38831	5.94938	4.65968	0.332402	3.15895	3.16603	2.46303	0.416746	3.56602	4.74572	3.38953	0.345844	4.05407	0.410461	0.553367	0.200859	-0.359924	-0.356697	-0.718936	-0.185057	0.227256	-0.258288	-0.866748	5	csrnp1	nm_033027
chr5	155547970	155548583	+	47	6	155548342	0.222961	1.65351	2.11541	2.63408	2.154	0.213687	1.47418	2.0616	1.08028	0.300984	2.34133	2.34982	2.34659	0.242091	2.06192	0.0369482	0.353308	0.0630307	-0.484077	-0.000224141	-0.932587	0.183337	0.188563	0.18658	-0.623392	5	sgcd	nm_172244
chr2	75822937	75823552	+	43	2	75823258	0.254812	1.35287	5.14883	6.13104	6.24221	0.261173	5.26492	4.8963	5.01249	0.532509	5.87132	7.23377	6.42054	0.518765	5.80238	-0.172401	0.0794866	0.105412	-0.140232	-0.244953	-0.211118	0.0170409	0.318103	0.146051	-0.202934	5	eva1a	nm_032181
chr12	60093340	60093916	+	65	9	60093628	0.350367	2.01428	1.91584	2.13451	1.71441	0.118715	1.47418	1.32531	1.20991	0.324136	1.08061	1.75085	1.82513	0.449597	1.60342	0.256829	0.412755	0.096562	-0.121238	-0.274815	-0.406249	-0.569302	0.126904	0.186849	-0.522816	5	slc16a7	nr_073056
chr6	3390823	3391351	+	47	7	3391103	0.254812	1.62345	7.58354	8.49262	7.73682	0.284916	5.10698	5.74303	4.45074	0.509357	5.58316	5.89759	6.12722	0.276675	6.30241	0.266968	0.430306	0.295837	-0.303435	-0.134092	-0.501858	-0.174822	-0.0957776	-0.0406717	-0.644165	5	slc22a23	nm_021945
chr7	13959731	13960434	+	85	10	13960078	0.445922	2.67568	2.31498	2.54325	1.53857	0.118715	2.42186	1.58301	2.11734	0.300984	2.84561	2.85665	2.86806	0.242091	2.34326	-0.0175192	0.118154	-0.606924	0.0476016	-0.565842	-0.146261	0.280222	0.285806	0.291558	-0.0527375	5	etv1	nm_001163150
chr1	245934843	245935697	+	63	7	245935120	0.41407	1.92409	3.79177	3.9057	3.42882	0.356145	2.73776	3.12921	3.54331	0.300984	3.56602	3.22525	3.22657	0.345844	3.39493	0.159489	0.202197	0.0143283	-0.310387	-0.117583	0.061714	0.0709306	-0.073974	-0.0733834	-0.247423	5	kif26b	nm_018012
chr2	106005105	106006073	+	221	9	106005532	0.0955546	6.67417	7.1445	7.03934	5.67074	0.23743	4.15929	5.08037	4.40753	0.254678	5.18694	6.08189	4.49764	0.276675	5.47425	0.384171	0.362779	0.0508759	-0.396324	-0.107727	-0.31269	-0.0777785	0.15186	-0.283493	-0.538189	5	fhl2	nm_001039492
chr9	96220966	96221562	+	61	9	96221290	0.445922	1.98421	0.997835	1.18079	1.14294	0.664804	0.947686	0.883543	0.604955	0.463052	1.00857	1.42832	1.14071	0.415012	1.03726	-0.0559067	0.186976	0.13997	-0.130298	-0.231407	-0.777879	-0.0404669	0.461544	0.137147	-0.470208	5	fam120aos	nm_198841
chr3	112497267	112497948	+	71	5	112497663	0.41407	2.31492	6.50588	5.35898	4.43988	0.213687	4.47519	3.90231	4.49395	0.254678	3.78214	4.7918	4.2695	0.276675	4.66885	0.478678	0.198892	-0.0725455	-0.0611193	-0.258736	-0.0550814	-0.303864	0.0374997	-0.129	-0.326654	5	rp11-572c15,5	nr_110017
chr10	104562732	104563397	+	99	9	104563058	0.286664	3.00638	3.23298	4.45068	3.47278	0.47486	2.36922	2.65063	2.67909	0.532509	3.06173	3.54777	3.58507	0.311259	3.22777	0.00232755	0.463487	0.105551	-0.446129	-0.284204	-0.268797	-0.0761905	0.136374	0.151464	-0.523499	5	wbp1l	nm_017787
chr2	26101030	26101596	+	70	4	26101330	0.382219	2.40511	4.59004	4.04194	3.73653	0.427374	2.36922	3.16603	3.71615	0.347289	3.27786	3.27132	3.25916	0.311259	3.49203	0.394441	0.210984	0.0976355	-0.559656	-0.141391	0.0897452	-0.091313	-0.0941914	-0.0995654	-0.438121	5	asxl2	nm_018263
chr5	121411608	121412063	+	40	3	121411812	0.254812	1.35287	3.91151	3.9057	4.5278	0.118715	2.79041	3.27647	3.54331	0.416746	3.67408	3.96245	4.20432	0.276675	3.75512	0.058869	0.0567231	0.269953	-0.428381	-0.196714	-0.0837598	-0.0314745	0.077534	0.163013	-0.3648	5	lox	nm_001178102
chr12	12551173	12551716	+	41	6	12551431	0.191109	1.47313	2.35489	2.77032	3.07715	0.356145	1.73742	2.61381	2.24698	0.416746	1.9451	2.44197	2.41178	0.311259	2.39994	-0.0273363	0.207057	0.358597	-0.466045	0.123161	-0.0950107	-0.303151	0.0250511	0.007101	-0.325404	5	loh12cr1	nm_058169
chr6	86173823	86174367	+	52	4	86174128	0.350367	1.89402	8.54146	8.90136	6.24221	0.308659	4.31724	5.96392	4.6668	0.300984	6.48367	7.41807	6.90942	0.345844	6.6049	0.370946	0.430488	-0.0814809	-0.613429	-0.147278	-0.501105	-0.026727	0.167506	0.0650263	-0.660588	5	nt5e	nm_001204813
chr11	131941741	131942491	+	75	11	131942098	0.318515	2.37504	8.82086	8.94677	7.95662	0.332402	4.15929	4.71223	5.53102	0.300984	6.55571	7.78667	7.43088	0.345844	6.87778	0.358975	0.379424	0.210212	-0.725607	-0.545534	-0.314398	-0.0691915	0.179062	0.11159	-0.844717	5	ntm	nm_001144059
chr2	224590040	224590723	+	55	7	224590384	0.41407	1.71364	3.79177	3.13364	3.69257	0.213687	2.21127	2.24567	2.59267	0.509357	3.3499	3.82422	3.22657	0.380428	3.1187	0.281928	0.00689657	0.243683	-0.49607	-0.473797	-0.266508	0.103173	0.294222	0.0490565	-0.589627	5	ap1s3	nm_001039569
chr3	61585865	61586248	+	28	4	61586070	0.0637031	0.992107	0.678528	0.544981	0.351674	0.47486	0.631791	0.331329	0.3889	0.601967	0.540306	0.46075	0.554057	0.55335	0.498035	0.446161	0.129959	-0.502009	0.3432	-0.587984	-0.356848	0.117529	-0.112264	0.153788	-0.225248	5	ptprg	nm_002841
chr2	11970051	11970890	+	63	10	11970562	0.382219	1.92409	6.02692	5.17732	5.23115	0.284916	4.47519	5.04356	4.14826	0.347289	4.75469	6.26619	4.53023	0.415012	5.07261	0.248692	0.0294768	0.0443984	-0.180782	-0.00828718	-0.290221	-0.0933774	0.30486	-0.163144	-0.267286	5	mir4262	nr_036226
chr10	53149504	53150141	+	49	4	53149876	0.159258	1.65351	2.55446	2.45242	2.28588	0.23743	1.73742	2.28249	1.51239	0.254678	1.87306	2.44197	1.46662	0.242091	2.06741	0.305191	0.246378	0.144924	-0.250875	0.14278	-0.450997	-0.142428	0.240221	-0.495329	-0.418528	5	mir605	nr_030336
chr18	61455578	61456147	+	56	5	61455877	0.350367	1.83389	2.79394	3.22447	2.68151	0.47486	1.15828	1.65664	1.38275	0.393594	2.95367	3.40955	3.61767	0.484181	2.54205	0.136305	0.343068	0.0770522	-1.13401	-0.617732	-0.878449	0.216515	0.423585	0.509065	-1.0622	5	serpinb7	nm_001261830
chr11	44863701	44864200	+	35	5	44863994	0.286664	1.17249	5.34839	5.13191	4.308	0.593575	5.58082	4.1232	4.32111	0.62512	6.55571	5.66722	5.67094	0.55335	5.1897	0.0434546	-0.0161564	-0.268632	0.104826	-0.331886	-0.264249	0.337101	0.12699	0.127936	-0.0833256	5	tspan18	nm_130783
chr20	9389844	9390367	+	44	5	9390168	0.222961	1.83389	6.02692	5.7223	5.18719	0.23743	3.89604	3.71824	4.23469	0.509357	4.82673	5.20647	5.57316	0.103753	4.93242	0.289127	0.214301	0.072658	-0.340285	-0.407673	-0.220039	-0.031248	0.0780109	0.176201	-0.514694	5	plcb4	nm_000933
chr9	87839313	87839801	+	48	8	87839516	0.254812	1.62345	2.55446	2.13451	2.50568	0.166201	1.68478	1.84071	1.46918	0.300984	1.72898	2.16552	2.24882	0.207506	2.03696	0.3266	0.0674877	0.298783	-0.27386	-0.146151	-0.471409	-0.236497	0.0882985	0.142751	-0.528097	5	agtpbp1	nm_015239
chr12	96199641	96200187	+	43	6	96199934	0.382219	1.65351	7.7432	6.72143	6.9016	0.142458	5.31757	5.04356	5.61744	0.439899	4.82673	6.26619	5.37761	0.207506	5.97948	0.372909	0.168749	0.20691	-0.169253	-0.245579	-0.0901072	-0.308974	0.0675689	-0.153055	-0.417835	5	ntn4	nm_021229
chr15	67397528	67398242	+	98	5	67397874	0.382219	3.06651	5.02909	6.67602	5.18719	0.522346	4.58048	4.85949	4.32111	0.486204	5.4751	5.94367	5.37761	0.345844	5.27219	-0.0681073	0.340584	-0.023451	-0.202904	-0.1176	-0.287002	0.0544813	0.17295	0.0285621	-0.285511	5	smad3	nm_001145102
chr10	103769433	103770011	+	79	9	103769732	0.477773	2.52536	1.39697	0.681226	0.57147	0.166201	0.526492	0.920357	0.950644	0.324136	0.90051	1.05972	0.977748	0.311259	0.887238	0.654907	-0.381186	-0.634643	-0.752908	0.0528732	0.0995845	0.021421	0.256296	0.140141	-0.0798425	5	c10orf76	nm_024541
chr19	42772433	42773402	+	154	5	42772989	0.477773	4.62983	2.87376	2.63408	2.98923	0.142458	1.94802	2.24567	1.77165	0.0694577	2.26928	2.0273	2.28141	0.0345844	2.33782	0.297776	0.172131	0.354607	-0.263156	-0.0580187	-0.400068	-0.0429284	-0.205608	-0.0352392	-0.515252	5	erf	nm_006494
chr11	94527339	94528156	+	76	13	94527626	0.350367	2.31492	5.90718	5.85855	5.31907	0.308659	5.63347	4.74904	4.83964	0.393594	5.04285	6.54264	5.70353	0.415012	5.51066	0.100244	0.0883169	-0.0510533	0.0317973	-0.214589	-0.187326	-0.127986	0.247648	0.0496285	-0.169208	5	amotl1	nm_130847
chr6	158439963	158440494	+	40	4	158440220	0.350367	1.413	3.67203	3.99653	3.03319	0.569832	2.42186	2.09841	2.37661	0.555662	2.34133	2.9488	2.93324	0.55335	2.86911	0.355975	0.478143	0.0802302	-0.244486	-0.451304	-0.271699	-0.293279	0.0395227	0.0318927	-0.627279	5	synj2	nm_001178088
chr11	109117703	109118331	+	56	9	109118018	0.445922	1.86396	1.87593	2.81574	1.84629	0.332402	1.15828	1.17806	1.25312	0.439899	1.98112	1.70477	2.08586	0.587934	1.76657	0.0866507	0.672557	0.0636724	-0.608967	-0.584545	-0.495428	0.165363	-0.0513747	0.239689	-0.837273	5	c11orf87	nm_207645
chr7	41956150	41956576	+	54	7	41956358	0.159258	1.71364	7.10458	5.94938	6.9016	0.142458	4.84373	5.30126	5.09891	0.254678	4.68265	5.52899	5.89908	0.380428	5.70113	0.317502	0.0614906	0.275682	-0.23513	-0.104913	-0.16106	-0.283923	-0.0442309	0.0492413	-0.385259	5	inhba	nm_002192
chr9	110412432	110412993	+	39	6	110412724	0.286664	1.38294	1.87593	1.36245	1.58253	0.617318	0.947686	1.25169	1.20991	0.393594	1.29673	1.38225	1.30366	0.311259	1.35698	0.467203	0.00580418	0.221832	-0.517921	-0.11653	-0.165502	-0.0655197	0.026615	-0.0578305	-0.498264	5	klf4	nm_004235
chr17	17838896	17839441	+	61	8	17839179	0.477773	2.07441	5.6677	5.67689	6.11033	0.47486	4.42254	5.44851	4.79643	0.62512	6.15949	6.68087	7.03978	0.276675	5.77806	-0.0278216	-0.0254851	0.0806655	-0.385711	-0.0847221	-0.268624	0.0922248	0.20945	0.284946	-0.255472	5	tom1l2	nm_001033551
chr10	45476572	45477226	+	55	4	45476858	0.254812	1.89402	8.82086	8.94677	8.39621	0.332402	6.68645	6.29524	5.74708	0.71773	6.98796	7.46414	6.32277	0.380428	7.29639	0.273737	0.294185	0.202556	-0.125941	-0.21292	-0.344354	-0.0623119	0.0327943	-0.206626	-0.484565	5	c10orf10	nm_007021
chr8	124852148	124852626	+	55	8	124852429	0.350367	1.92409	3.07333	2.63408	2.32984	0.166201	1.89537	2.02479	2.20377	0.231526	1.87306	2.53412	2.41178	0.449597	2.33113	0.398776	0.17627	-0.00079661	-0.298545	-0.203257	-0.0810558	-0.315629	0.12046	0.0490702	-0.385703	5	fer1l6	nm_001039112
chr11	40350680	40351158	+	53	5	40350926	0.41407	1.80383	3.43255	3.58779	2.50568	0.118715	1.63213	2.17204	2.29019	0.370441	2.26928	2.44197	2.34659	0.242091	2.5198	0.44597	0.509785	-0.0081114	-0.626558	-0.214258	-0.137845	-0.151074	-0.045264	-0.102742	-0.642102	5	lrrc4c	nr_047673
chr15	86166935	86167401	+	49	8	86167093	0.286664	1.98421	2.43472	2.45242	1.97816	0.356145	1.36888	1.25169	1.1667	0.370441	1.9451	1.6587	1.85772	0.276675	1.79045	0.443429	0.453878	0.143838	-0.387329	-0.516453	-0.617892	0.11952	-0.110274	0.0532084	-0.854273	5	akap13	nm_001270546
chr6	129811651	129812076	+	30	4	129811868	0.286664	1.32281	8.74103	8.67428	7.51703	0.284916	7.00235	6.1848	6.43845	0.231526	7.02398	7.64844	7.82198	0.103753	7.45026	0.230513	0.219454	0.0128713	-0.089452	-0.268564	-0.210577	-0.085003	0.0378752	0.0702433	-0.34381	5	arhgap18	nm_033515
chr14	50527485	50528196	+	90	6	50527880	0.382219	2.73581	9.73887	10.4001	9.0556	0.451117	8.05533	8.83543	8.25332	0.324136	8.53683	10.5051	9.2886	0.380428	9.18546	0.0844021	0.179168	-0.0205416	-0.189408	-0.0560515	-0.154377	-0.105651	0.193665	0.0161099	-0.214288	5	rp11-58e21,3	nr_102736
chr9	18238201	18238726	+	38	5	18238478	0.191109	1.50319	2.71411	2.27075	2.41776	0.213687	1.89537	1.87753	1.08028	0.324136	1.9451	2.30375	2.02068	0.449597	2.05837	0.398977	0.14167	0.232167	-0.119021	-0.132667	-0.9301	-0.0816572	0.162481	-0.0266623	-0.651534	5	adamtsl1	nm_052866
chr5	35129143	35129811	+	74	9	35129474	0.509625	2.52536	1.23731	1.4987	1.1869	0.47486	0.895037	0.920357	0.864222	0.694577	0.90051	1.15187	1.14071	0.242091	1.0884	0.185001	0.461498	0.124986	-0.282192	-0.241946	-0.332738	-0.273398	0.0817713	0.0677151	-0.542787	5	prlr	nm_001204318
chr7	15790745	15791356	+	42	5	15791060	0.191109	1.32281	7.02476	6.58519	6.15429	0.166201	4.79108	5.70622	6.30882	0.324136	5.72724	6.58872	5.47539	0.172922	6.04019	0.217855	0.124631	0.026999	-0.334243	-0.0820595	0.0627765	-0.0767532	0.125404	-0.141633	-0.241003	5	ac005550,4	nr_110094
chr12	2272291	2273083	+	69	6	2272712	0.159258	2.1646	4.07117	4.40526	2.68151	0.23743	2.84306	2.65063	1.77165	0.277831	2.80959	2.71842	3.12879	0.276675	3.0089	0.436206	0.549993	-0.166189	-0.0817917	-0.182901	-0.764138	-0.0988759	-0.146466	0.0563704	-0.61628	5	cacna1c-as4	nr_046578
chr6	57107174	57107688	+	40	6	57107430	0.222961	1.32281	4.23082	5.35898	5.05531	0.142458	3.1063	2.28249	3.19762	0.208373	5.76326	5.34469	5.73612	0.207506	4.45284	-0.0737902	0.267232	0.183072	-0.519528	-0.964121	-0.477728	0.372158	0.26338	0.365348	-0.779297	5	rab23	nm_016277
chr2	12596431	12596915	+	36	6	12596670	0.191109	1.32281	1.31714	1.31704	1.53857	0.118715	0.68444	0.699472	1.5556	0.208373	1.36877	0.875424	1.1733	0.276675	1.16997	0.170935	0.170821	0.395117	-0.773479	-0.742138	0.410995	0.226409	-0.418421	0.00409299	-0.613832	5	trib2	nr_027303
chr11	12011746	12012400	+	97	11	12012089	0.732586	3.03645	1.63645	1.4987	1.71441	0.569832	1.21093	0.809914	0.7778	0.439899	1.00857	1.24402	1.23848	0.449597	1.2377	0.40291	0.276051	0.470053	-0.0315405	-0.611818	-0.670188	-0.295346	0.00735523	0.000912207	-0.820853	5	dkk3	nm_001018057
chr7	22616918	22617689	+	76	7	22617212	0.382219	2.46524	6.58571	7.85681	5.97845	0.189944	4.31724	4.30727	4.19148	0.347289	4.39449	5.75937	5.27984	0.380428	5.40785	0.284283	0.538889	0.144717	-0.324947	-0.328281	-0.367597	-0.29936	0.0908556	-0.0345617	-0.662905	5	ac002480,3	nr_038393
chr5	68745990	68746321	+	26	4	68746138	0.0955546	0.841788	0.758354	1.4987	1.45065	0.189944	0.631791	0.846729	0.691377	0.555662	1.22469	1.19795	1.01034	0.484181	1.03451	-0.448003	0.534763	0.487757	-0.711428	-0.288975	-0.581401	0.243474	0.211619	-0.034107	-0.718774	5	marveld2	nm_001244734
chr4	165125369	165125997	+	61	5	165125701	0.350367	1.95415	1.4768	1.4987	1.67045	0.094972	1.21093	1.21487	1.08028	0.277831	2.84561	2.44197	3.22657	0.276675	1.8518	-0.326456	-0.305216	-0.148689	-0.612808	-0.608122	-0.777524	0.619812	0.399121	0.801074	-0.406031	5	anp32c	nm_012403
chr10	44363607	44364003	+	26	2	44363822	0.191109	1.32281	9.45947	11.0359	9.01164	0.356145	6.7391	6.77383	5.87671	0.324136	8.21265	9.26107	7.49607	0.242091	8.20738	0.204838	0.427207	0.134868	-0.284365	-0.27695	-0.481913	0.000926133	0.174257	-0.130788	-0.60338	5	linc00840	nr_038268
chr5	34715780	34716390	+	73	5	34716129	0.222961	2.31492	2.43472	2.9974	2.94527	0.451117	2.00067	2.46656	2.3334	0.393594	3.63806	4.51535	3.97617	0.484181	3.03418	-0.317551	-0.0175951	-0.0429061	-0.600821	-0.298806	-0.378872	0.261864	0.573531	0.390076	-0.300149	5	rai14	nm_001145523
chr12	123574249	123574826	+	41	6	123574496	0.286664	1.35287	3.51238	3.63321	3.20902	0.379888	2.42186	2.46656	3.02478	0.555662	2.70153	2.85665	2.57474	0.518765	2.93341	0.259868	0.308664	0.129554	-0.276462	-0.250081	0.0442482	-0.118804	-0.0382575	-0.188156	-0.39346	5	rp11-197n18,7	nr_038290
chr5	73938852	73939502	+	67	8	73939279	0.509625	2.10447	3.67203	3.58779	4.26404	0.427374	3.1063	2.65063	3.45689	0.671425	3.85418	4.51535	4.56282	0.518765	3.74112	-0.02689	-0.060372	0.188754	-0.268269	-0.497134	-0.113995	0.042956	0.271368	0.286458	-0.326963	5	enc1	nm_001256576
chr6	1477507	1478030	+	49	7	1477796	0.350367	1.65351	2.55446	2.67949	2.59359	0.23743	1.52683	1.50939	1.68523	0.347289	2.37735	2.7645	2.57474	0.415012	2.25173	0.181983	0.250925	0.203919	-0.560496	-0.577072	-0.418086	0.078318	0.295984	0.193391	-0.730827	5	mir6720	nr_106778
chr11	86195115	86195726	+	113	16	86195424	0.509625	3.75798	3.95143	5.54064	4.13217	0.142458	3.47485	3.27647	3.02478	0.208373	3.8902	3.8703	3.65026	0.380428	3.8679	0.0308231	0.518503	0.0953485	-0.154599	-0.239407	-0.354721	0.00829502	0.000894001	-0.0835515	-0.464467	5	ccdc81	nm_021827
chr5	55322641	55323157	+	37	6	55322902	0.159258	1.26268	1.55662	1.8166	1.53857	0.356145	1.31623	1.25169	1.5556	0.324136	1.72898	2.11945	1.59699	0.172922	1.60897	-0.0477186	0.175106	-0.0645447	-0.289725	-0.362265	-0.0486668	0.103783	0.397551	-0.010784	-0.2545	5	flj31104	nr_102755
chr20	52961721	52962156	+	33	2	52961901	0.159258	1.23262	3.11324	3.26989	2.63755	0.284916	2.10597	2.42974	2.16055	0.277831	2.34133	2.5802	2.50955	0.415012	2.572	0.275526	0.346348	0.0363079	-0.288408	-0.0820885	-0.251491	-0.135567	0.00458919	-0.0354622	-0.426723	5	dok5	nm_018431
chr15	83956327	83956931	+	55	8	83956664	0.159258	1.7437	2.83385	3.08823	2.54963	0.23743	1.68478	1.91434	2.46303	0.370441	2.37735	2.62627	3.19398	0.449597	2.52572	0.16607	0.290085	0.0135974	-0.584137	-0.399844	-0.0362577	-0.0873416	0.0563234	0.33866	-0.496664	5	bnc1	nm_001717
chr16	78218230	78218912	+	106	11	78218582	0.318515	3.2469	0.957921	0.953717	0.395633	0.403631	0.68444	0.368143	0.259267	0.393594	0.432245	0.737199	0.651832	0.276675	0.604488	0.664192	0.657846	-0.611552	0.179209	-0.715449	-1.22128	-0.483867	0.28634	0.108785	-0.822668	5	wwox	nm_130844
chr1	211210298	211211070	+	73	6	211210774	0.41407	2.28485	5.90718	5.54064	5.4949	0.332402	4.31724	4.23364	4.23469	0.393594	4.17836	4.56142	4.88874	0.242091	4.81742	0.294208	0.201791	0.189832	-0.158154	-0.186362	-0.186007	-0.205323	-0.0787788	0.0212003	-0.405451	5	kcnh1	nm_172362
chr22	36025856	36026329	+	54	8	36026037	0.222961	1.83389	3.99134	3.99653	4.48384	0.118715	2.84306	3.12921	3.93221	0.324136	3.20581	4.19282	3.38953	0.138337	3.68493	0.115236	0.117111	0.283099	-0.374192	-0.235836	0.0937038	-0.200945	0.186285	-0.120553	-0.343923	5	mb	nm_203377
chr21	27268091	27268391	+	44	7	27268247	0.222961	1.413	0.279394	0.363321	0.351674	0.356145	0.526492	0.404957	0.129633	0.370441	0.504285	0.3686	0.423691	0.587934	0.37245	-0.414746	-0.0358015	-0.0828077	0.499367	0.120724	-1.52261	0.437195	-0.0149907	0.185966	-0.123054	5	atp5j	nm_001003701
chr7	47331044	47331576	+	93	13	47331264	0.477773	2.826	6.5458	6.22187	5.89054	0.451117	4.36989	3.6078	3.41368	0.439899	5.94336	6.17404	5.99685	0.345844	5.35154	0.290616	0.217395	0.138446	-0.292357	-0.568833	-0.648627	0.151327	0.206263	0.164252	-0.718758	5	tns3	nm_022748
chr20	17891424	17891933	+	32	5	17891640	0.191109	1.02217	0.878095	1.04455	1.1869	0.47486	0.842388	0.5154	0.345689	0.439899	0.720408	1.01365	0.782198	0.518765	0.814364	0.108703	0.359133	0.543452	0.0488115	-0.65998	-1.2362	-0.176859	0.315813	-0.0581389	-0.952885	5	snord17	nr_003045
chr1	8149651	8150862	+	153	5	8150372	0.350367	4.53964	5.18874	6.08562	4.92343	0.356145	5.42287	5.11719	4.71001	0.324136	6.05143	5.94367	6.15981	0.345844	5.51142	-0.0870394	0.142981	-0.162759	-0.0233668	-0.107073	-0.226694	0.134851	0.10893	0.160462	-0.0834387	5	errfi1	nm_018948
chr14	75086401	75086876	+	48	8	75086716	0.191109	1.65351	8.62129	7.67515	7.29723	0.166201	5.73877	5.19081	4.40753	0.254678	7.74438	7.55629	7.17015	0.276675	6.8224	0.337624	0.169916	0.0970694	-0.249539	-0.394319	-0.630309	0.182871	0.147399	0.0717236	-0.626259	5	ltbp2	nm_000428
chr9	137483367	137483794	+	27	3	137483628	0.254812	1.47313	8.74103	10.4455	8.57205	0.427374	8.00268	7.54693	5.35818	0.300984	7.34816	7.87882	6.5835	0.622518	7.83076	0.158652	0.415654	0.130488	0.031332	-0.0532621	-0.54741	-0.091769	0.0088272	-0.250297	-0.424711	5	col5a1	nm_000093
chr6	159605568	159606101	+	73	8	159605706	0.350367	2.40511	6.18657	6.3127	5.40698	0.118715	3.6328	3.97594	3.93221	0.231526	4.97081	4.74572	5.89908	0.172922	5.00698	0.3052	0.334316	0.110883	-0.46286	-0.332643	-0.3486	-0.0104587	-0.0773136	0.236549	-0.631501	5	fndc1	nm_032532
chr6	170018599	170019452	+	91	7	170018996	0.0637031	2.76587	3.83169	3.54238	3.20902	0.261173	2.94836	2.72426	3.80258	0.509357	3.38592	3.8703	3.16138	0.103753	3.38621	0.178308	0.0650473	-0.0775365	-0.199759	-0.313808	0.167306	-0.000124304	0.192773	-0.0991143	-0.170693	5	wdr27	nm_001202550
chr4	99981249	99981613	+	38	3	99981468	0.127406	1.23262	3.71194	4.58692	4.308	0.189944	3.1063	3.05559	4.10505	0.347289	4.39449	4.2389	4.2695	0.345844	3.97519	-0.0988481	0.206504	0.115996	-0.355824	-0.379574	0.0463777	0.144671	0.0926651	0.103043	-0.304224	5	adh5	nm_000671
chr4	177715298	177715826	+	57	8	177715499	0.382219	1.89402	6.14666	6.58519	4.87947	0.118715	3.7381	3.68143	3.32725	0.393594	4.86275	5.71329	5.21465	0.311259	4.90542	0.325426	0.424847	-0.00765197	-0.392074	-0.414112	-0.560045	-0.0126043	0.219945	0.0881942	-0.702951	5	vegfc	nm_005429
chr14	51771746	51772046	+	31	5	51771869	0.191109	1.11236	4.39047	4.72317	4.04425	0.522346	2.31657	2.3193	2.85193	0.416746	3.38592	4.4232	3.22657	0.518765	3.52015	0.318738	0.424118	0.200234	-0.60365	-0.601948	-0.303698	-0.0560914	0.329451	-0.125638	-0.817462	5	linc00640	nr_038358
chr15	39607343	39607726	+	84	11	39607529	0.445922	2.91619	1.43688	1.58953	0.879184	0.23743	0.631791	0.883543	1.12349	0.486204	1.9451	1.70477	1.75995	0.55335	1.32825	0.113416	0.259074	-0.595287	-1.07201	-0.588153	-0.24154	0.55032	0.360055	0.406006	-0.559634	5	c15orf54	nm_207445
chr7	100765333	100765633	+	37	6	100765338	0.222961	1.38294	6.14666	5.85855	5.31907	0.142458	4.63313	4.8963	4.96928	0.185221	6.48367	7.23377	6.9746	0.242091	5.835	0.0750698	0.00580975	-0.13356	-0.332745	-0.253041	-0.231698	0.152077	0.310014	0.257377	-0.254934	5	serpine1	nm_000602
chr8	118683989	118684705	+	45	6	118684355	0.286664	1.50319	2.79394	3.54238	2.19796	0.213687	1.68478	1.36213	2.03092	0.347289	2.44939	2.7645	2.57474	0.276675	2.37786	0.232637	0.575056	-0.113497	-0.497106	-0.803799	-0.227528	0.0427579	0.217355	0.114762	-0.740876	5	med30	nm_001282986
chr13	36553457	36554081	+	41	4	36553814	0.254812	1.50319	5.069	4.99566	4.57176	0.641061	3.47485	3.0924	3.71615	0.370441	3.60204	4.00852	3.91099	0.345844	4.04904	0.324121	0.303095	0.175169	-0.22063	-0.388853	-0.12377	-0.168767	-0.0145104	-0.0500463	-0.511879	5	mir548f5	nr_031646
chr6	80838084	80838646	+	56	6	80838355	0.191109	1.83389	2.79394	2.54325	1.80233	0.23743	1.84272	1.87753	2.3334	0.185221	1.54888	2.5802	2.86806	0.345844	2.24337	0.316634	0.181006	-0.315804	-0.283826	-0.25683	0.0567679	-0.534443	0.201816	0.35441	-0.221908	5	bckdhb	nm_000056
chr8	38266232	38266749	+	39	6	38266456	0.191109	1.44306	3.5922	5.31357	4.43988	0.451117	4.21194	3.31329	5.31496	0.393594	4.46653	6.45049	5.67094	0.103753	4.75264	-0.403861	0.16095	-0.0982094	-0.174246	-0.520468	0.16133	-0.0895767	0.440679	0.254857	-0.0640879	5	letm2	nm_001199660
chr10	125607090	125607774	+	63	5	125607402	0.318515	2.13453	1.67636	0.953717	0.615429	0.213687	0.895037	0.883543	0.7778	0.231526	1.33275	1.42832	0.912565	0.311259	1.05284	0.671052	-0.142649	-0.774617	-0.234262	-0.252909	-0.436811	0.340129	0.440041	-0.206283	-0.225923	5	cpxm2	nm_198148
chr3	30512474	30513039	+	46	7	30512762	0.318515	1.7437	3.91151	3.08823	3.42882	0.166201	3.58015	2.90833	3.75937	0.231526	3.42194	4.28497	4.39986	0.415012	3.64257	0.102768	-0.23818	-0.0872467	-0.0249393	-0.324768	0.0455305	-0.0901454	0.234327	0.272501	-0.0271727	5	tgfbr2	nm_001024847
chr5	36657512	36658297	+	105	9	36657836	0.41407	3.33709	4.19091	4.814	4.22009	0.284916	4.15929	3.64461	3.889	0.254678	4.93479	5.29862	4.6606	0.242091	4.42354	-0.0779409	0.122033	-0.0679308	-0.0888658	-0.279437	-0.185804	0.157787	0.260414	0.0753119	-0.176756	5	slc1a3	nm_001166696
chr7	22898414	22898876	+	60	10	22898602	0.318515	2.4953	7.42389	7.8114	6.81368	0.142458	5.52817	5.48533	4.88285	0.393594	5.61918	6.26619	6.12722	0.311259	6.21755	0.25583	0.329235	0.132089	-0.169543	-0.180767	-0.348621	-0.145985	0.0112442	-0.0211128	-0.472028	5	snord93	nr_003075
chr14	55443109	55443625	+	37	4	55443354	0.286664	1.38294	2.35489	2.67949	3.3409	0.213687	2.00067	2.20886	1.68523	0.439899	2.26928	2.11945	2.314	0.242091	2.33031	0.0151385	0.201438	0.519716	-0.220037	-0.0772207	-0.467573	-0.0382836	-0.136833	-0.0101304	-0.500375	5	wdhd1	nm_001008396
chr3	11641852	11642446	+	35	5	11642120	0.318515	1.32281	6.2664	6.3127	7.34119	0.356145	5.21227	6.47932	5.66065	0.324136	5.90734	6.49657	6.55091	0.242091	6.24748	0.004362	0.0149816	0.232739	-0.261362	0.0525661	-0.142307	-0.0807657	0.0564027	0.06842	-0.201062	5	vgll4	nm_001284391
chr5	142533040	142533651	+	47	5	142533433	0.382219	1.68358	8.78094	8.76511	8.26433	0.308659	6.8444	6.40569	6.91377	0.185221	6.59173	7.32592	6.35536	0.484181	7.36081	0.254512	0.251909	0.167035	-0.10494	-0.200511	-0.0903903	-0.159207	-0.00685442	-0.21189	-0.356432	5	nr3c1	nm_001024094
chr8	134045392	134045924	+	48	7	134045616	0.350367	1.59338	5.10891	4.2236	4.7476	0.332402	2.94836	2.577	3.41368	0.509357	3.42194	3.77815	3.38953	0.484181	3.73431	0.452176	0.177634	0.346357	-0.340929	-0.535147	-0.129514	-0.126027	0.0168384	-0.139757	-0.660586	5	mir7848	nr_107002
chr18	65092814	65093326	+	44	5	65093116	0.286664	1.35287	2.3948	2.36158	2.154	0.142458	1.31623	1.61983	2.3334	0.324136	2.08918	2.34982	2.41178	0.415012	2.11451	0.179581	0.159429	0.0266929	-0.683914	-0.384485	0.142106	-0.017388	0.152225	0.18977	-0.430665	5	rp11-638l3,1	nr_033921
chr15	63220990	63221468	+	67	11	63221272	0.509625	2.22472	7.66337	7.08475	6.63784	0.261173	5.79142	4.78586	5.53102	0.393594	7.13204	7.27984	7.49607	0.138337	6.60025	0.215459	0.102198	0.00819474	-0.188603	-0.463742	-0.254974	0.111795	0.141388	0.183614	-0.411057	5	mir190a	nr_029709
chr1	240163970	240164380	+	27	4	240164176	0.222961	1.14243	0.439047	0.726642	0.879184	0.332402	0.631791	0.404957	0.648166	0.254678	0.612347	1.01365	0.749607	0.415012	0.678377	-0.62771	0.0991573	0.374079	-0.10264	-0.744317	-0.0657223	-0.147738	0.5794	0.144047	-0.252735	5	rps7p5	nr_036695
chr6	17907820	17908362	+	41	6	17908102	0.254812	1.50319	7.66337	9.44634	8.52809	0.213687	6.05466	5.00674	6.26561	0.601967	6.08745	6.91124	6.90942	0.79544	6.98588	0.133537	0.435314	0.287781	-0.206395	-0.480569	-0.156987	-0.198605	-0.0154966	-0.0158778	-0.566861	5	kif13a	nm_001243423
chr15	62898433	62899100	+	86	6	62898768	0.127406	2.67568	3.31281	3.67862	3.60466	0.189944	2.57981	2.13523	2.3334	0.324136	2.44939	2.85665	3.16138	0.242091	2.90133	0.191343	0.342453	0.313148	-0.169447	-0.442322	-0.31428	-0.244293	-0.0223903	0.123843	-0.590998	5	mgc15885	nr_026897
chr4	108817100	108817717	+	51	2	108817388	0.350367	1.77377	5.14883	5.44981	5.31907	0.284916	4.79108	5.33807	4.88285	0.463052	5.11489	5.71329	4.69319	0.207506	5.16123	-0.00347174	0.0784908	0.0434574	-0.107364	0.0486033	-0.079991	-0.0130109	0.146607	-0.137147	-0.0857429	4	sgms2	nm_152621
chr2	56089586	56090226	+	46	7	56089952	0.318515	1.59338	5.98701	7.85681	5.75866	0.261173	6.89705	5.89029	5.8335	0.208373	4.50255	6.26619	5.34502	0.276675	6.03745	-0.0121048	0.380004	-0.0682074	0.192039	-0.0356022	-0.0495789	-0.423198	0.0536494	-0.175744	-0.0642778	4	efemp1	nm_001039349
chr1	8087458	8088060	+	40	5	8087670	0.254812	1.53326	6.14666	5.67689	6.37409	0.356145	7.47619	6.11117	6.91377	0.300984	4.71867	5.62114	5.8013	0.172922	6.09332	0.0125742	-0.102129	0.0649899	0.295075	0.00422032	0.182245	-0.368848	-0.116365	-0.0708519	0.168702	4	errfi1	nm_018948
chr9	112903701	112904126	+	32	5	112903899	0.0955546	1.14243	2.75402	3.3153	2.63755	0.308659	2.79041	3.31329	2.76551	0.347289	2.44939	2.67235	2.44437	0.276675	2.79358	-0.0205723	0.247027	-0.0829131	-0.00163642	0.24615	-0.0145677	-0.189693	-0.0640057	-0.192651	0.0288012	4	akap2	nm_001136562
chr11	18405050	18405751	+	65	10	18405447	0.509625	2.28485	10.617	11.3538	10.4623	0.189944	12.8464	12.8114	12.8337	0.277831	10.0857	12.5324	10.3315	0.242091	11.5416	-0.120469	-0.0236677	-0.14164	0.154526	0.150585	0.153097	-0.194527	0.118822	-0.159785	0.247995	4	ldha	nm_001165415
chr6	22880927	22881726	+	94	11	22881318	0.222961	2.826	5.94709	6.08562	5.23115	0.166201	5.42287	6.11117	7.0002	0.208373	5.76326	7.04947	5.93167	0.0345844	6.06028	-0.027199	0.00602089	-0.212257	-0.160327	0.0120651	0.208011	-0.0724984	0.21813	-0.0309459	0.0977281	4	hdgfl1	nm_138574
chr20	33893533	33894026	+	49	8	33893722	0.41407	1.80383	9.97835	10.4455	9.45123	0.451117	9.37156	8.57773	8.42616	0.532509	8.17663	8.61602	8.18049	0.415012	9.02485	0.144898	0.210903	0.0665997	0.054387	-0.0733069	-0.099027	-0.142397	-0.0668818	-0.141716	-0.180116	4	fam83c	nm_178468
chr17	39216452	39216965	+	33	3	39216717	0.159258	1.0823	6.66554	7.85681	6.50596	0.189944	7.21295	6.58976	6.6113	0.208373	7.81642	7.97097	7.59384	0.138337	7.20262	-0.1118	0.125423	-0.146758	0.00206749	-0.128295	-0.123588	0.117988	0.146234	0.0763087	-0.0388935	4	krtap2-3	nm_001165252
chr2	119425849	119426623	+	47	5	119426464	0.222961	1.65351	6.8651	5.63147	5.97845	0.23743	6.26526	5.26444	5.70386	0.324136	5.40306	6.45049	6.35536	0.311259	5.99083	0.196524	-0.0892448	-0.00298443	0.0646173	-0.186476	-0.0708172	-0.148981	0.106653	0.085217	-0.0989903	4	loc101927709	nr_110272
chr16	20917767	20918520	+	103	11	20918170	0.254812	3.30702	8.10242	8.35638	7.47307	0.261173	8.47653	8.68817	8.46937	0.254678	6.98796	6.68087	8.08271	0.172922	7.92416	0.0320937	0.076619	-0.0845582	0.0972146	0.132794	0.0959967	-0.181388	-0.246223	0.0285811	0.100617	4	lyrm1	nm_001128302
chr6	115934671	115935126	+	37	6	115934924	0.286664	1.32281	0.399134	0.499566	0.835225	0.308659	0.737089	0.294514	0.518533	0.300984	0.252143	0.598974	0.456282	0.345844	0.510162	-0.354084	-0.030281	0.711209	0.530883	-0.792619	0.0234797	-1.01672	0.231538	-0.16103	-0.188367	4	tpi1p3	nr_027338
chr9	33328965	33329560	+	39	5	33329281	0.286664	1.26268	6.30632	5.90396	5.18719	0.23743	4.84373	5.154	5.14212	0.463052	4.64663	4.83787	4.2695	0.172922	5.14348	0.294053	0.198939	0.012208	-0.0866263	0.00294811	-0.000381334	-0.14656	-0.0883725	-0.268678	-0.19642	4	nfx1	nm_147133
chr17	38705527	38706105	+	78	8	38705862	0.445922	2.55543	12.3332	11.8988	11.2096	0.379888	12.3199	11.7069	12.488	0.393594	10.518	10.9658	10.3967	0.380428	11.5374	0.0962281	0.0444873	-0.0415884	0.0946697	0.0210412	0.11422	-0.133469	-0.0733071	-0.150195	0.0436012	4	ccr7	nm_001838
chr11	8714509	8715154	+	50	6	8714902	0.41407	1.71364	3.63212	4.85942	4.57176	0.308659	5.63347	5.11719	5.14212	0.416746	4.35847	5.02217	4.07395	0.622518	4.71229	-0.375619	0.044353	-0.0436804	0.257594	0.118921	0.125934	-0.112609	0.0918811	-0.210002	0.292465	4	snora45	nr_002977
chr1	8940101	8940659	+	38	4	8940467	0.286664	1.35287	6.14666	7.40266	6.59388	0.213687	7.73944	6.73702	6.6113	0.347289	6.37561	7.51022	5.60575	0.380428	6.74695	-0.134432	0.133809	-0.0331068	0.197994	-0.00212556	-0.0293017	-0.0816721	0.15462	-0.267327	0.0667655	4	eno1	nm_001428
chr7	134377739	134378496	+	63	10	134378020	0.350367	2.10447	10.577	11.5354	10.4183	0.451117	9.74011	8.90906	10.7596	0.393594	9.47336	9.49144	9.58193	0.138337	10.054	0.073163	0.198298	0.0513508	-0.0457642	-0.174429	0.0978454	-0.0858256	-0.083075	-0.0693862	-0.148387	4	bpgm	nm_001724
chr7	79082858	79083390	+	62	7	79083101	0.318515	2.01428	6.2664	5.58606	6.19825	0.23743	6.47586	6.11117	4.40753	0.254678	5.07887	6.08189	4.56282	0.172922	5.64098	0.15169	-0.0141167	0.135914	0.199124	0.115502	-0.355976	-0.151438	0.108574	-0.30602	-0.104946	4	magi2-as3	nr_038344
chr18	8945956	8946664	+	53	4	8946374	0.350367	1.62345	5.98701	5.85855	6.63784	0.284916	6.31791	5.33807	5.91992	0.370441	4.57459	5.66722	6.09463	0.657103	5.82175	0.0403828	0.00909056	0.189262	0.117995	-0.125134	0.0241252	-0.34781	-0.0388114	0.0660856	-0.0739164	4	ndufv2	nm_021074
chr3	105084834	105085442	+	47	5	105085144	0.254812	1.65351	5.42822	7.26642	6.19825	0.142458	6.6338	6.9579	7.17304	0.254678	5.90734	7.46414	6.06204	0.172922	6.56568	-0.274466	0.146299	-0.0830843	0.0148911	0.0837069	0.12764	-0.152436	0.185031	-0.115143	0.14583	4	alcam	nm_001627
chr1	109913214	109913802	+	43	2	109913573	0.350367	1.50319	11.535	11.1721	10.1106	0.332402	12.0567	12.0751	12.6176	0.393594	10.518	12.7167	12.3522	0.138337	11.6838	-0.0184922	-0.0646041	-0.208635	0.0453258	0.0475274	0.110936	-0.151652	0.122217	0.0802632	0.165173	4	sort1	nm_001205228
chr2	102577426	102578867	+	168	18	102577944	0.318515	4.68996	4.03125	3.81487	4.13217	0.332402	5.79142	6.7002	6.00634	0.300984	3.42194	3.73207	3.45471	0.415012	4.565	-0.179386	-0.25898	-0.143715	0.343303	0.553591	0.395873	-0.4158	-0.290637	-0.40205	0.624949	4	linc01127	nr_103791
chr5	142623479	142624201	+	58	9	142623602	0.318515	1.95415	11.0959	11.3084	11.6492	0.356145	10.4772	9.60853	9.24717	0.370441	10.0137	8.61602	8.76714	0.103753	10.087	0.137529	0.164889	0.20773	0.0547526	-0.0701127	-0.125416	-0.0105298	-0.227407	-0.202322	-0.216975	4	nr3c1	nm_001024094
chr11	128110367	128110880	+	37	6	128110619	0.222961	1.29275	1.27723	1.36245	1.01106	0.332402	1.42153	0.920357	1.1667	0.324136	0.97255	1.38225	1.1733	0.484181	1.18749	0.105099	0.198289	-0.232046	0.259526	-0.367652	-0.0254845	-0.288072	0.2191	-0.017349	-0.0683172	4	ets1	nm_005238
chr7	96578518	96579482	+	66	11	96579238	0.382219	2.01428	4.78961	4.49609	4.04425	0.071229	4.05399	3.82869	4.32111	0.208373	4.03428	4.93002	4.00877	0.415012	4.27853	0.162791	0.0715559	-0.0812449	-0.0777736	-0.160267	0.0142852	-0.0848041	0.204477	-0.0939585	-0.125619	4	dlx6	nm_005222
chr9	114803837	114804653	+	91	10	114804243	0.445922	2.826	7.30415	6.13104	7.78078	0.284916	6.52851	6.14799	7.08662	0.277831	4.82673	6.72694	6.25759	0.449597	6.53226	0.161134	-0.0914509	0.252333	-0.000829539	-0.0874682	0.117515	-0.436536	0.0423689	-0.0619762	-0.0975995	4	mir4668	nr_039814
chr10	4705346	4705826	+	58	9	4705543	0.477773	2.04434	9.49939	10.6271	9.2754	0.332402	8.63447	9.86623	8.68543	0.254678	10.2298	10.459	9.48415	0.380428	9.64011	-0.0212156	0.140631	-0.0556411	-0.158941	0.033449	-0.150453	0.0856548	0.117625	-0.023531	-0.11324	4	linc00705	nr_015425
chr11	65188401	65189149	+	65	7	65188810	0.254812	1.98421	14.0096	13.8062	14.7703	0.189944	12.5832	14.0999	14.4757	0.370441	12.8953	12.3942	10.9508	0.449597	13.3317	0.0715575	0.0504571	0.147841	-0.083363	0.0808241	0.118777	-0.0480129	-0.105197	-0.283825	-0.0512059	4	neat1	nr_028272
chr18	65192481	65193237	+	56	5	65192852	0.350367	1.77377	3.43255	3.36072	2.50568	0.261173	3.36955	2.90833	3.06799	0.208373	2.66551	2.30375	3.03102	0.345844	2.96057	0.213409	0.182897	-0.240673	0.186684	-0.0256821	0.0514201	-0.151462	-0.36189	0.0339298	0.0189298	4	dsel	nm_032160
chr1	225887744	225888431	+	59	7	225888140	0.222961	1.92409	8.22216	9.35551	7.60495	0.23743	8.58183	9.09313	7.69157	0.208373	8.78897	8.98462	7.62643	0.172922	8.4388	-0.0375202	0.148779	-0.150099	0.0242474	0.10774	-0.133758	0.0586576	0.0904197	-0.146029	0.0123564	4	enah	nm_001008493
chr20	33894784	33895441	+	46	6	33895096	0.286664	1.65351	9.21999	9.08302	8.96768	0.403631	12.3199	9.93986	10.4571	0.601967	9.3653	8.84639	8.76714	0.760856	9.66293	-0.0676954	-0.089289	-0.107726	0.35046	0.0407643	0.113948	-0.0451357	-0.127372	-0.140355	0.256628	4	fam83c	nm_178468
chr9	86986677	86987066	+	24	2	86986916	0.159258	0.962043	5.26857	5.44981	4.70364	0.189944	5.89671	5.48533	5.18533	0.393594	4.57459	5.20647	4.46505	0.242091	5.13728	0.0364066	0.0852024	-0.127227	0.198907	0.0945742	0.0134321	-0.167362	0.0193015	-0.202328	0.104177	4	slc28a3	nm_022127
chr14	68407501	68408251	+	60	9	68407872	0.286664	1.83389	2.59437	2.95198	2.59359	0.308659	3.1063	2.50337	2.93835	0.370441	1.80102	1.79692	1.85772	0.276675	2.4604	0.0764889	0.262788	0.0760572	0.336304	0.0249771	0.256113	-0.450082	-0.453367	-0.405362	0.0673533	4	rad51b	nm_133510
chr5	32027875	32028641	+	93	13	32028308	0.191109	2.85607	3.8716	3.22447	2.81339	0.213687	3.26425	3.49736	3.45689	0.208373	2.52143	3.45562	2.93324	0.242091	3.22647	0.262972	-0.000894735	-0.197648	0.0167951	0.116308	0.099516	-0.355717	0.0989877	-0.137461	0.0560633	4	mir4279	nr_036241
chr1	66736831	66737433	+	45	2	66737135	0.286664	1.53326	5.98701	5.35898	4.87947	0.071229	6.15996	6.07436	5.70386	0.277831	4.79071	5.71329	6.25759	0.449597	5.65836	0.0814513	-0.0784251	-0.213658	0.122537	0.102348	0.0115558	-0.240144	0.013939	0.145222	0.149024	4	pde4b	nm_001037339
chr11	19400396	19400784	+	30	1	19400568	0.254812	1.23262	0.957921	1.18079	1.53857	0.284916	1.42153	1.43576	1.68523	0.324136	1.15265	1.01365	1.20589	0.311259	1.288	-0.427153	-0.125377	0.256461	0.142312	0.15668	0.387816	-0.160175	-0.345574	-0.0950352	0.327625	4	nav2	nm_001111018
chr17	66576382	66576751	+	37	6	66576481	0.350367	1.44306	7.86294	8.03847	7.82474	0.308659	7.73944	7.58374	7.34589	0.509357	5.79928	5.25254	4.92133	0.622518	6.92982	0.182251	0.214104	0.175225	0.159411	0.130092	0.0841187	-0.256943	-0.399801	-0.493769	-0.0659857	4	fam20a	nm_017565
chr3	41309418	41310001	+	45	6	41309746	0.318515	1.38294	2.95359	3.04281	2.90131	0.284916	2.00067	2.8347	2.67909	0.393594	2.05316	2.53412	2.44437	0.449597	2.60487	0.181259	0.224194	0.155493	-0.380727	0.121985	0.0405309	-0.343363	-0.0397247	-0.0917488	-0.259719	4	ctnnb1	nm_001098210
chr2	113998487	113999026	+	55	8	113998677	0.41407	1.89402	5.18874	6.53977	5.40698	0.427374	5.05433	4.52816	5.0557	0.532509	5.07887	4.69965	4.56282	0.518765	5.12389	0.0181444	0.352001	0.0775842	-0.019721	-0.178316	-0.0193297	-0.0127311	-0.124688	-0.167313	-0.221699	4	pax8-as1	nr_015377
chr12	57527538	57527953	+	29	4	57527803	0.286664	1.32281	10.0981	9.94591	9.58311	0.23743	10.5825	9.42446	8.5558	0.324136	9.50938	8.98462	8.21308	0.172922	9.43299	0.0982945	0.0763873	0.0227784	0.165893	-0.00130582	-0.140813	0.0116361	-0.0702587	-0.199792	-0.0578956	4	lrp1	nm_002332
chr3	72395723	72396183	+	49	8	72395906	0.254812	1.7437	3.55229	4.04194	3.64862	0.189944	3.4222	3.64461	3.75937	0.486204	3.99826	4.19282	3.38953	0.242091	3.73885	-0.0738442	0.112455	-0.0352451	-0.12767	-0.0368278	0.00789487	0.0967792	0.165327	-0.141511	-0.0533229	4	rybp	nm_012234
chr11	45110715	45111387	+	53	6	45111104	0.382219	1.65351	6.06683	6.17645	6.33013	0.189944	8.95037	7.69419	6.6113	0.277831	6.62775	7.23377	6.5835	0.345844	6.91937	-0.189696	-0.163861	-0.128405	0.371308	0.153129	-0.0657064	-0.0621203	0.0641076	-0.0717847	0.313564	4	prdm11	nr_046338
chr11	9786945	9787551	+	44	5	9787212	0.318515	1.47313	9.02043	9.08302	9.80291	0.498603	10.3719	10.0871	9.50644	0.463052	8.32071	9.03069	8.40863	0.518765	9.29243	-0.0428599	-0.0328834	0.0771542	0.158553	0.118386	0.0328499	-0.159349	-0.0412189	-0.144185	0.102793	4	rp11-540a21,2	nr_033972
chr1	170278721	170279076	+	48	6	170278790	0.286664	1.7437	6.14666	6.26728	6.24221	0.332402	5.79142	5.48533	6.65451	0.463052	5.4751	4.2389	5.11688	0.311259	5.71314	0.105519	0.133556	0.127772	0.0196316	-0.0587063	0.220048	-0.0613995	-0.430596	-0.15902	-0.0619579	4	linc01142	nr_026957
chr1	64626882	64627578	+	55	9	64627229	0.382219	1.71364	3.39264	3.86028	3.42882	0.142458	4.00134	4.56497	4.19148	0.231526	3.85418	3.5017	3.58507	0.484181	3.82005	-0.171185	0.0151138	-0.155881	0.066891	0.257013	0.133865	0.0128316	-0.125539	-0.0915897	0.256574	4	ube2u	nm_152489
chr2	237551118	237551726	+	62	9	237551430	0.286664	2.34498	6.06683	6.17645	6.72576	0.142458	5.84407	6.47932	5.74708	0.347289	4.50255	4.9761	4.59541	0.207506	5.67928	0.0952348	0.121069	0.243988	0.041263	0.190132	0.0171187	-0.334967	-0.190695	-0.305514	-0.0705928	4	ackr3	nm_020311
chr17	55970196	55970801	+	67	10	55970505	0.191109	2.19466	6.98484	7.8114	5.7147	0.189944	7.26559	7.28923	7.17304	0.300984	6.62775	7.09554	6.87683	0.311259	6.9821	0.000566066	0.161919	-0.288984	0.0574193	0.0621048	0.0389234	-0.0751421	0.0232516	-0.0219188	0.0949822	4	cuedc1	nr_073495
chr2	128326784	128327374	+	52	5	128327042	0.254812	1.62345	2.79394	3.49696	2.41776	0.451117	3.5275	3.71824	3.67294	0.555662	3.06173	3.17917	2.80288	0.449597	3.18568	-0.189302	0.134501	-0.397932	0.147044	0.22302	0.205335	-0.0572531	-0.00295049	-0.184693	0.342711	4	myo7b	nm_001080527
chr22	24684922	24685543	+	44	6	24685313	0.127406	1.35287	6.30632	5.63147	6.11033	0.261173	6.6338	6.00073	6.65451	0.138915	7.13204	5.89759	6.06204	0.242091	6.26987	0.00836181	-0.154923	-0.0371848	0.0814009	-0.0632976	0.0858966	0.185879	-0.0883089	-0.0486331	0.0959154	4	specc1l	nm_001145468
chr3	114215651	114216211	+	44	6	114215943	0.254812	1.35287	1.7961	2.17992	1.58253	0.546089	2.10597	2.35611	2.11734	0.439899	2.1252	1.42832	1.89031	0.518765	1.95354	-0.121218	0.15819	-0.303853	0.108397	0.270322	0.116167	0.121513	-0.451765	-0.0474634	0.253922	4	zbtb20	nm_001164342
chr2	204549711	204550551	+	97	10	204550021	0.605179	3.06651	9.14017	10.4909	9.23144	0.261173	10.1087	9.09313	10.0682	0.277831	9.76152	9.26107	9.54934	0.242091	9.63382	-0.0758877	0.122957	-0.0615529	0.0694109	-0.0833311	0.0636236	0.0189985	-0.0569298	-0.0127076	0.0213958	4	cd28	nm_001243078
chr2	173860407	173861000	+	56	4	173860719	0.254812	1.71364	3.51238	3.86028	3.73653	0.142458	3.84339	4.19683	3.80258	0.370441	4.17836	3.82422	3.81322	0.103753	3.86309	-0.137307	-0.00104805	-0.0480542	-0.00737378	0.119545	-0.0227776	0.113184	-0.0145887	-0.0187465	0.0919342	4	rapgef4	nm_001282901
chr7	7196666	7197276	+	50	8	7196952	0.350367	1.71364	8.42172	9.12843	7.78078	0.332402	7.63414	8.17277	8.29653	0.370441	8.42877	9.44537	9.38638	0.276675	8.52166	-0.017018	0.0992338	-0.131219	-0.158668	-0.0603081	-0.0386256	-0.0158115	0.148473	0.139435	-0.0695331	4	c1galt1	nm_020156
chr4	77908299	77909004	+	55	6	77908656	0.318515	1.95415	8.42172	9.67342	7.51703	0.142458	9.26627	10.0871	9.50644	0.231526	8.42877	9.62967	8.86491	0.207506	9.04393	-0.102834	0.0970761	-0.266787	0.0350388	0.157493	0.071956	-0.101627	0.0905365	-0.0288429	0.179011	4	2011-09-01	nm_018243
chr11	61738795	61739700	+	73	8	61739261	0.286664	2.19466	7.54363	7.58432	7.47307	0.284916	7.84474	7.28923	7.0002	0.277831	6.08745	6.08189	5.14947	0.276675	6.89489	0.129732	0.137493	0.116173	0.186198	0.0802392	0.0218684	-0.17969	-0.181006	-0.421103	-0.0316976	4	fth1	nm_002032
chr6	39850330	39850826	+	50	8	39850616	0.318515	2.22472	8.9406	9.53717	7.60495	0.23743	8.95037	9.24039	9.20396	0.300984	7.70836	8.20134	7.07237	0.138337	8.4955	0.0736723	0.166862	-0.159761	0.0752482	0.121254	0.115556	-0.140275	-0.0508391	-0.264504	0.0770951	4	mocs1	nm_005943
chr3	153292301	153292651	+	29	4	153292490	0.191109	1.0823	0.399134	0.454151	0.483551	0.261173	0.473843	0.294514	0.734589	0.300984	0.252143	0.46075	0.391099	0.311259	0.438197	-0.134707	0.0515921	0.142089	0.11283	-0.573242	0.745357	-0.797339	0.0724029	-0.164046	0.0753233	4	c3orf79	nm_001101337
chr9	89677901	89678573	+	46	5	89678266	0.254812	1.7437	6.06683	5.99479	6.06637	0.142458	7.58149	6.1848	7.51873	0.254678	6.0154	6.45049	6.29018	0.311259	6.46323	-0.091312	-0.108546	-0.0914219	0.230225	-0.0635288	0.218233	-0.103594	-0.00284639	-0.0391554	0.225403	4	loc440173	nr_027471
chr3	101900351	101900715	+	30	4	101900664	0.222961	1.29275	6.06683	6.72143	4.57176	0.166201	6.26526	5.22763	5.40139	0.300984	5.295	5.39077	5.76871	0.242091	5.63431	0.106705	0.25453	-0.301489	0.153135	-0.108082	-0.0609089	-0.0896088	-0.0637474	0.0340104	-0.0252006	4	loc152225	nr_026934
chr10	14116402	14116801	+	35	5	14116584	0.350367	1.44306	4.35056	4.99566	4.26404	0.569832	3.84339	3.6078	4.10505	0.393594	3.31388	3.36347	3.19398	0.622518	3.89309	0.160284	0.359759	0.131306	-0.0185358	-0.109797	0.0764844	-0.232397	-0.210966	-0.285563	-0.234399	4	frmd4a	nm_018027
chr3	30700488	30701351	+	69	8	30701098	0.254812	2.1646	9.10025	8.62887	8.57205	0.332402	8.26593	7.10516	7.95084	0.416746	6.77183	7.27984	7.43088	0.449597	7.90063	0.203939	0.127204	0.117673	0.0652097	-0.153101	0.00914007	-0.222421	-0.11806	-0.0884339	-0.175855	4	tgfbr2	nm_001024847
chr18	51675430	51676018	+	39	4	51675633	0.254812	1.26268	6.94493	6.44894	6.24221	0.166201	7.055	6.66339	6.91377	0.300984	5.15092	5.71329	4.69319	0.345844	6.20285	0.163029	0.0561319	0.00912575	0.185715	0.103325	0.156543	-0.268102	-0.118608	-0.402362	0.0724317	4	snora37	nr_002970
chr12	63096301	63097001	+	70	11	63096580	0.286664	2.37504	11.974	12.4892	12.8361	0.261173	11.0563	11.9646	11.1917	0.486204	9.43734	10.4129	8.73455	0.345844	11.1219	0.106509	0.167277	0.206808	-0.00852432	0.105379	0.00902758	-0.236946	-0.0950207	-0.348594	-0.124904	4	mirlet7i	nr_029661
chr6	133872996	133873726	+	90	10	133873357	0.286664	2.76587	1.35706	1.63494	2.02212	0.261173	2.05332	1.2885	1.25312	0.416746	1.33275	1.70477	1.75995	0.55335	1.60073	-0.238247	0.0305139	0.337145	0.359232	-0.313034	-0.3532	-0.264316	0.0908531	0.136804	-0.145471	4	mgc34034	nr_027030
chr4	54931845	54932376	+	65	11	54932124	0.286664	2.07441	5.94709	6.90309	6.24221	0.546089	5.94936	5.89029	6.56809	0.648272	5.69122	5.75937	6.02944	0.380428	6.10891	-0.0387294	0.176329	0.0311423	-0.0381791	-0.0525766	0.104559	-0.102176	-0.0850036	-0.0188895	-0.0516463	4	chic2	nm_012110
chr5	53942290	53942865	+	44	4	53942594	0.350367	1.56332	5.98701	6.04021	6.24221	0.308659	5.26492	5.9271	5.31496	0.486204	5.25898	4.51535	5.21465	0.518765	5.52949	0.114689	0.127452	0.174911	-0.0707333	0.100181	-0.0570858	-0.0723638	-0.292309	-0.0845742	-0.14823	4	loc102467080	nr_104659
chr3	55194476	55195126	+	73	11	55194802	0.509625	2.31492	5.34839	5.99479	4.87947	0.284916	5.37022	4.82267	4.23469	0.208373	4.03428	5.62114	4.72578	0.172922	5.00349	0.0961697	0.260774	-0.0362105	0.102046	-0.0531033	-0.240681	-0.310624	0.167928	-0.0823834	-0.170824	4	lrtm1	nm_020678
chr10	71951501	71952103	+	36	6	71951806	0.254812	1.20255	6.74536	6.72143	6.28617	0.284916	8.16063	7.51012	9.42002	0.300984	5.61918	6.40442	5.34502	0.242091	6.91248	-0.0353082	-0.040435	-0.137023	0.239477	0.119631	0.446526	-0.298844	-0.110136	-0.371009	0.339467	4	sar1a	nm_001142648
chr1	18201053	18201731	+	41	6	18201345	0.286664	1.413	8.70112	7.85681	8.48413	0.308659	8.84507	9.75579	9.50644	0.347289	8.39275	9.44537	8.66936	0.587934	8.85076	-0.0246005	-0.171857	-0.0610346	-0.000927475	0.140457	0.103104	-0.0766576	0.0938054	-0.0298753	0.166709	4	actl8	nm_030812
chr15	68900533	68901251	+	54	7	68900816	0.318515	1.80383	2.19524	2.72491	2.94527	0.664804	1.94802	2.79789	2.59267	0.81034	1.80102	1.88907	1.79254	0.518765	2.29851	-0.0663243	0.245506	0.357698	-0.238691	0.283637	0.173736	-0.351887	-0.283022	-0.358697	-0.106066	4	coro2b	nm_001190456
chr11	8740727	8741276	+	63	10	8741007	0.350367	2.19466	7.7432	7.85681	7.42911	0.332402	6.68645	7.62056	7.56194	0.347289	7.02398	7.83274	7.56125	0.207506	7.47956	0.049976	0.0709907	-0.00976426	-0.161712	0.0269434	0.0158033	-0.0906655	0.0665642	0.0156712	-0.0767227	4	snora45	nr_002977
chr3	171847516	171848311	+	51	8	171847806	0.350367	1.59338	2.55446	2.31617	2.24192	0.118715	2.42186	2.0616	2.41982	0.138915	1.83704	2.48805	2.47696	0.345844	2.3131	0.14319	0.00191474	-0.0450914	0.066292	-0.166062	0.0650741	-0.332443	0.105188	0.0987447	-0.044903	4	fndc3b	nm_001135095
chr4	138882070	138882677	+	45	5	138882389	0.286664	1.56332	2.71411	2.58866	3.16506	0.379888	3.15895	2.87151	2.46303	0.208373	2.37735	2.16552	2.21623	0.276675	2.6356	0.0423459	-0.0259276	0.264101	0.261314	0.123679	-0.0976979	-0.148782	-0.283418	-0.250027	0.00225825	4	slc7a11-as1	nr_038380
chr12	13251403	13251990	+	55	7	13251714	0.477773	2.1646	7.58354	9.08302	7.12139	0.284916	7.79209	9.31402	8.1669	0.324136	6.51969	6.45049	6.9746	0.380428	7.6673	-0.0158473	0.244452	-0.10656	0.0232903	0.280684	0.0910685	-0.233916	-0.24931	-0.136609	0.0909991	4	gsg1	nm_031289
chr2	109788129	109788610	+	43	4	109788388	0.318515	1.50319	6.50588	6.72143	7.73682	0.403631	6.89705	8.06233	7.17304	0.324136	7.2401	7.23377	7.46347	0.311259	7.22599	-0.15145	-0.104426	0.0985462	-0.0672156	0.158002	-0.0106101	0.00281416	0.00155228	0.0466523	0.0791687	4	mir4265	nr_036223
chr21	30631300	30631798	+	38	3	30631610	0.254812	1.38294	4.07117	3.13364	2.85735	0.356145	3.6328	3.46054	4.14826	0.138915	2.91765	3.5017	3.29175	0.415012	3.4461	0.240479	-0.137123	-0.270285	0.0761181	0.00603584	0.267545	-0.240155	0.0230914	-0.0661077	0.172209	4	bach1	nm_001186
chr11	128366751	128367608	+	80	13	128367139	0.445922	2.46524	4.86943	4.40526	5.80262	0.356145	5.37022	4.93311	4.10505	0.300984	4.0703	3.22525	2.93324	0.415012	4.41272	0.142085	-0.00244031	0.395035	0.283313	0.16083	-0.104268	-0.116532	-0.452259	-0.589172	-0.0649348	4	ets1	nm_005238
chr6	168619839	168620258	+	37	5	168620128	0.191109	1.29275	4.11108	3.58779	3.03319	0.284916	3.26425	3.3501	3.02478	0.324136	2.95367	2.67235	3.16138	0.276675	3.23984	0.343593	0.147172	-0.09509	0.0108286	0.0482803	-0.0990955	-0.133415	-0.277817	-0.0353677	-0.145221	4	rp11-503c24,4	nr_110870
chr1	92676500	92676998	+	29	4	92676804	0.159258	0.992107	2.83385	2.67949	2.76943	0.23743	3.1063	2.54019	2.20377	0.300984	2.59347	2.9488	3.0962	0.55335	2.75239	0.0420796	-0.0387252	0.00890552	0.174515	-0.11575	-0.320713	-0.0858015	0.0994425	0.169815	-0.0914025	4	c1orf146	nm_001012425
chr20	10742294	10742702	+	33	4	10742462	0.318515	1.47313	3.67203	3.81487	3.38486	0.23743	3.05366	3.01877	3.67294	0.439899	3.24183	4.00852	2.99843	0.415012	3.42955	0.0985609	0.153616	-0.0189214	-0.16748	-0.184056	0.0989189	-0.0812069	0.225053	-0.193812	-0.161957	4	rp1-278o22,1	nr_110611
chr11	47026093	47026631	+	36	4	47026346	0.254812	1.17249	1.59654	1.58953	1.4067	0.356145	1.94802	1.95116	1.68523	0.393594	1.47684	1.61262	1.9229	0.380428	1.68773	-0.0801361	-0.0864819	-0.262771	0.206929	0.209249	-0.00213293	-0.192571	-0.0656711	0.188206	0.281145	4	c11orf49	nm_024113
chr11	36477152	36477750	+	41	4	36477413	0.382219	1.53326	9.25991	9.67342	9.31935	0.213687	7.63414	8.5041	8.51259	0.416746	7.52826	8.80032	9.45156	0.311259	8.74263	0.0829307	0.145959	0.0921633	-0.195601	-0.039908	-0.0384694	-0.21575	0.0094886	0.112486	-0.198344	4	traf6	nm_004620
chr4	88000101	88000805	+	82	12	88000490	0.222961	2.55543	3.71194	3.76945	2.98923	0.403631	3.2116	2.87151	3.62973	0.231526	2.73755	3.1331	3.06361	0.345844	3.2353	0.198274	0.220454	-0.114129	-0.0106073	-0.172089	0.165962	-0.241016	-0.0463116	-0.0786686	-0.107111	4	aff1	nm_005935
chr8	38384698	38386069	+	100	16	38385566	0.318515	2.64562	4.11108	4.814	4.04425	0.427374	4.47519	4.34409	4.01863	0.370441	4.50255	4.56142	4.69319	0.276675	4.39604	-0.0966885	0.131031	-0.120334	0.0257418	-0.0171528	-0.129501	0.0345363	0.0532776	0.094363	-0.0116401	4	c8orf86	nm_207412
chr17	38706965	38708675	+	126	15	38707620	0.41407	2.94626	13.371	14.1695	12.2207	0.23743	14.4259	14.2103	12.9201	0.208373	11.4905	12.7167	11.6026	0.242091	13.0141	0.0390255	0.12271	-0.0907576	0.14858	0.126858	-0.0104611	-0.179638	-0.0333573	-0.165631	0.0646667	4	ccr7	nm_001838
chr9	33320326	33320914	+	37	6	33320570	0.127406	1.20255	6.62562	8.03847	6.46201	0.403631	6.79175	6.84746	7.08662	0.486204	6.12347	7.04947	6.29018	0.276675	6.81278	-0.0401881	0.238677	-0.0762621	-0.00446042	0.00732446	0.0568535	-0.153896	0.0492703	-0.115143	-0.0208365	4	nfx1	nm_147133
chr9	99276221	99277620	+	114	10	99277350	0.318515	3.18677	7.30415	8.44721	7.8687	0.308659	6.42321	6.9579	8.12369	0.254678	6.73581	6.77302	6.77905	0.345844	7.26808	0.00714176	0.2169	0.114551	-0.178281	-0.0629224	0.16056	-0.109723	-0.101776	-0.100491	-0.139745	4	cdc14b	nm_001077181
chr5	67342197	67342706	+	39	5	67342470	0.0955546	1.59338	4.11108	4.2236	4.08821	0.23743	6.31791	5.4117	4.79643	0.208373	3.78214	5.29862	4.10654	0.311259	4.6818	-0.187547	-0.14859	-0.195596	0.432383	0.209018	0.034897	-0.307861	0.178552	-0.189141	0.402677	4	loc102467655	nr_105003
chr10	124254715	124255561	+	49	5	124255357	0.318515	1.47313	10.0183	11.7171	9.97874	0.451117	8.42388	10.2712	10.1546	0.486204	9.86959	11.1501	9.19083	0.276675	10.086	-0.0097273	0.216256	-0.0154293	-0.259803	0.0262437	0.00977511	-0.0312978	0.144702	-0.134092	-0.138294	4	htra1	nm_002775
chr2	43186340	43187263	+	53	7	43186576	0.254812	1.59338	7.50372	8.53804	8.0885	0.498603	11.3196	9.5349	8.33974	0.300984	7.81642	8.20134	7.56125	0.311259	8.54483	-0.187447	-0.00114764	-0.0791807	0.405697	0.158166	-0.0350497	-0.128544	-0.0591922	-0.176428	0.265529	4	ac016735,2	nr_110585
chr5	146796565	146797368	+	55	7	146797004	0.41407	1.80383	3.39264	3.13364	3.38486	0.356145	2.84306	2.98196	2.76551	0.439899	2.62949	2.71842	2.57474	0.276675	2.93603	0.208538	0.0939712	0.205227	-0.0464251	0.0223907	-0.0863235	-0.159087	-0.111099	-0.189445	-0.206032	4	dpysl3	nm_001387
chr5	112293919	112294576	+	43	6	112294304	0.286664	1.413	0.997835	1.45328	0.747307	0.403631	1.00034	1.43576	1.59881	0.486204	1.08061	0.921499	0.81479	0.415012	1.11669	-0.162359	0.380084	-0.579459	-0.158747	0.362581	0.517768	-0.0473833	-0.277177	-0.454732	0.361111	4	dcp2	nm_152624
chr2	47058381	47059226	+	93	5	47058832	0.41407	2.826	10.2178	9.76425	7.82474	0.261173	7.79209	7.58374	6.78414	0.393594	7.02398	7.55629	6.48573	0.415012	7.89253	0.372528	0.307021	-0.012445	-0.0184783	-0.0575778	-0.218322	-0.1682	-0.0628095	-0.28322	-0.320494	4	linc01119	nr_024452
chr3	151022747	151023332	+	44	5	151023069	0.318515	1.47313	1.23731	1.86202	1.36274	0.284916	2.36922	1.8039	2.03092	0.416746	1.4048	1.19795	1.23848	0.345844	1.61193	-0.381572	0.208083	-0.242279	0.555624	0.162334	0.333349	-0.198426	-0.428219	-0.380214	0.489026	4	gpr87	nm_023915
chr6	11609488	11610328	+	75	7	11609838	0.222961	2.25479	5.26857	4.95025	5.09927	0.332402	5.10698	4.85949	4.96928	0.0926103	5.58316	5.48292	5.76871	0.276675	5.23207	0.0100294	-0.0798812	-0.0370907	-0.034912	-0.106577	-0.0743457	0.0937006	0.0675631	0.140868	-0.0362975	4	tmem170b	nm_001100829
chr4	86395840	86396542	+	77	6	86396261	0.191109	2.37504	1.59654	1.8166	2.46172	0.403631	1.63213	2.61381	2.11734	0.300984	1.765	2.0273	2.02068	0.380428	2.00568	-0.329147	-0.142847	0.295573	-0.297338	0.382066	0.0781643	-0.184424	0.0154671	0.0107487	0.113104	4	arhgap24	nm_001025616
chr2	45404810	45405415	+	58	7	45405004	0.318515	1.95415	5.14883	5.4044	4.00029	0.379888	5.63347	5.59577	5.8335	0.254678	5.43908	5.62114	4.88874	0.242091	5.28502	-0.0376661	0.0322236	-0.401806	0.0921135	0.0824273	0.142451	0.0414524	0.088954	-0.112448	0.241413	4	linc01121	nr_033831
chr1	183239865	183240251	+	41	6	183240057	0.318515	1.50319	8.9406	10.1276	7.56099	0.47486	9.52951	7.91507	7.51873	0.439899	7.2401	7.14162	7.69162	0.484181	8.18509	0.127373	0.307218	-0.114424	0.219404	-0.0483954	-0.122509	-0.176989	-0.196747	-0.0897114	-0.0905559	4	nmnat2	nm_170706
chr12	64311607	64312254	+	56	7	64311989	0.286664	1.77377	6.98484	8.1293	6.54992	0.403631	8.73977	7.62056	9.59286	0.162068	8.10459	8.24742	7.30052	0.207506	7.91886	-0.181066	0.0378379	-0.273815	0.142302	-0.0553969	0.276668	0.0334451	0.0586487	-0.117295	0.260206	4	srgap1	nm_020762
chr1	151952716	151953426	+	80	10	151952976	0.254812	2.55543	2.35489	1.90743	2.85735	0.284916	2.73776	1.98797	2.67909	0.231526	1.98112	1.52047	2.02068	0.657103	2.22742	0.0802869	-0.223739	0.359305	0.297623	-0.164075	0.266369	-0.169055	-0.550852	-0.140533	0.061355	4	s100a10	nm_002966
chr12	57530121	57530795	+	47	4	57530506	0.222961	1.50319	4.70978	4.72317	5.14323	0.071229	4.58048	3.90231	3.97542	0.208373	4.64663	4.51535	3.97617	0.138337	4.46362	0.0774465	0.0815424	0.204461	0.0372869	-0.193883	-0.167106	0.0579717	0.0166234	-0.166832	-0.229051	4	lrp1	nm_002332
chr6	13761186	13761526	+	59	9	13761366	0.41407	2.1646	8.50155	8.1293	6.98952	0.403631	9.31891	8.20959	9.89534	0.509357	6.23153	8.56994	7.13756	0.415012	8.10925	0.0681579	0.00356327	-0.214376	0.200594	0.0177414	0.287181	-0.379983	0.0797171	-0.184138	0.216057	4	ranbp9	nm_005493
chr5	152930914	152931543	+	56	6	152931192	0.286664	1.83389	3.8716	3.9057	4.22009	0.189944	3.5275	3.93913	3.5001	0.208373	3.74612	3.40955	3.51989	0.138337	3.73774	0.0507628	0.063414	0.175106	-0.0835209	0.0757102	-0.094771	0.00323071	-0.132587	-0.0866355	-0.130621	4	gria1	nm_001258021
chr3	146031223	146032072	+	58	5	146031718	0.159258	1.80383	5.78744	6.49436	4.79156	0.284916	8.16063	6.77383	6.52487	0.347289	5.8353	6.12797	6.22499	0.276675	6.30233	-0.122959	0.0433021	-0.395391	0.372796	0.104087	0.0500653	-0.111077	-0.0404759	-0.0178126	0.333999	4	plscr4	nm_001177304
chr7	4707717	4708327	+	38	6	4707968	0.222961	1.20255	6.2664	7.76598	6.6818	0.522346	7.055	6.40569	7.12983	0.601967	5.54714	6.12797	5.8013	0.207506	6.53123	-0.0597185	0.249813	0.0328814	0.11129	-0.0280025	0.126512	-0.235612	-0.0919467	-0.170979	-0.00439203	4	foxk1	nm_001037165
chr4	77905968	77906623	+	66	10	77906272	0.222961	2.01428	6.46597	7.08475	5.45094	0.332402	5.10698	5.70622	5.96313	0.393594	5.8353	5.39077	6.06204	0.242091	5.89623	0.133073	0.264924	-0.113288	-0.207324	-0.0472594	0.0162765	-0.014986	-0.129302	0.0400088	-0.174339	4	2011-09-01	nm_018243
chr8	67036060	67036544	+	31	2	67036354	0.222961	1.02217	5.94709	6.04021	7.29723	0.332402	7.10765	6.29524	5.61744	0.463052	6.98796	5.94367	6.48573	0.484181	6.41358	-0.108945	-0.0865316	0.186219	0.148242	-0.0268676	-0.191216	0.123741	-0.109776	0.0161384	-0.0201949	4	trim55	nm_184087
chr14	68674706	68675351	+	63	10	68674988	0.41407	2.04434	3.39264	3.76945	3.07715	0.189944	3.94869	4.3809	4.88285	0.254678	3.63806	3.36347	2.93324	0.345844	3.70961	-0.128859	0.0230891	-0.269673	0.090109	0.239961	0.396458	-0.0280971	-0.141315	-0.338769	0.367324	4	rad51b	nm_133510
chr8	38895456	38896041	+	44	5	38895803	0.318515	1.56332	6.94493	8.40179	7.03348	0.284916	7.26559	7.51012	8.29653	0.300984	6.77183	8.56994	8.27826	0.207506	7.67472	-0.144154	0.130583	-0.125876	-0.0790332	-0.031279	0.112394	-0.180568	0.159171	0.109214	0.0471763	4	adam9	nm_003816
chr2	106103424	106104089	+	55	5	106103820	0.286664	1.95415	7.62346	7.67515	7.42911	0.379888	7.89739	9.49809	7.04341	0.231526	7.38418	7.37199	5.99685	0.380428	7.54662	0.0146138	0.0243637	-0.0226425	0.0655436	0.331805	-0.0995578	-0.0313939	-0.0337769	-0.331626	0.0938187	4	fhl2	nm_201557
chr20	1914780	1915815	+	69	8	1915617	0.222961	2.07441	3.35272	2.95198	2.11004	0.284916	2.94836	2.61381	2.37661	0.185221	2.55745	2.30375	2.41178	0.276675	2.62517	0.352925	0.169274	-0.315137	0.167502	-0.00625238	-0.143504	-0.0377046	-0.188426	-0.122312	-0.0631054	4	sirpa	nm_001040023
chr4	148499045	148499719	+	66	4	148499438	0.445922	2.13453	1.39697	1.54411	1.09898	0.332402	1.57948	1.14124	1.59881	0.300984	1.00857	1.93515	1.07552	0.276675	1.37543	0.022421	0.1669	-0.323713	0.199568	-0.269273	0.21712	-0.447566	0.492565	-0.354841	0.093936	4	tmem184c	nm_018241
chr17	71287820	71288704	+	48	6	71288506	0.159258	1.47313	6.34623	6.85768	6.11033	0.332402	6.8444	6.11117	5.57423	0.254678	5.79928	5.98974	6.64868	0.415012	6.25353	0.0212291	0.13305	-0.0334197	0.130254	-0.0332212	-0.165898	-0.108796	-0.062176	0.0883985	-0.0632415	4	cdc42ep4	nm_012121
chr2	237570615	237571174	+	43	6	237570955	0.286664	1.62345	5.42822	6.08562	5.36302	0.261173	5.73877	6.11117	6.74093	0.370441	5.11489	4.7918	4.82356	0.415012	5.57755	-0.0391532	0.125772	-0.0565855	0.0411082	0.131817	0.273315	-0.124928	-0.219066	-0.209536	0.138735	4	ackr3	nm_020311
chr16	66907075	66907555	+	28	1	66907320	0.159258	1.02217	2.03558	2.17992	2.11004	0.166201	3.15895	2.20886	2.76551	0.324136	1.36877	1.88907	1.98809	0.172922	2.18942	-0.105109	-0.00627241	-0.0532785	0.528896	0.0127497	0.336995	-0.677666	-0.212872	-0.13917	0.347767	4	pdp2	nm_020786
chr12	2373975	2374876	+	71	9	2374343	0.445922	2.22472	10.0582	9.99132	10.1985	0.308659	9.42421	9.12994	9.89534	0.300984	8.57285	9.49144	8.21308	0.276675	9.44166	0.0912565	0.0816355	0.111251	-0.00266776	-0.0484339	0.0677094	-0.139265	0.00758716	-0.201116	-0.0891783	4	cacna1c-it3	nr_046769
chr6	151389077	151389755	+	50	6	151389326	0.41407	1.7437	4.35056	5.58606	5.18719	0.23743	4.79108	4.52816	5.31496	0.277831	3.42194	3.1331	4.49764	0.138337	4.53452	-0.059749	0.30088	0.194003	0.0794012	-0.00202561	0.22911	-0.406137	-0.53336	-0.0117818	-0.0428828	4	akap12	nm_005100
chr15	67417723	67418604	+	98	11	67418186	0.318515	3.00638	6.74536	8.53804	7.47307	0.569832	6.7391	7.36286	5.74708	0.347289	6.91591	6.40442	5.70353	0.449597	6.84771	-0.0217251	0.318284	0.12608	-0.0230646	0.104645	-0.252793	0.014299	-0.0965534	-0.263766	-0.19795	4	smad3	nm_001145102
chr15	45934394	45934948	+	41	6	45934671	0.350367	1.56332	5.46813	4.814	4.17613	0.427374	5.68612	5.70622	5.74708	0.416746	4.61061	5.20647	4.85615	0.311259	5.14121	0.0889405	-0.0948719	-0.299943	0.145336	0.150426	0.16072	-0.157151	0.0181975	-0.082296	0.254119	4	sqrdl	nm_021199
chr2	208123036	208123759	+	103	12	208123427	0.573328	3.27696	5.98701	6.08562	5.62678	0.189944	5.52817	5.26444	5.79029	0.300984	4.89877	6.12797	5.14947	0.207506	5.6065	0.0947341	0.118304	0.00520852	-0.0202992	-0.09082	0.0465336	-0.194681	0.128308	-0.122677	-0.0942774	4	ac007879,2	nr_110283
chr8	26322923	26323723	+	88	12	26323298	0.445922	2.67568	4.66987	5.4044	5.14323	0.427374	6.21261	6.25843	5.96313	0.532509	4.71867	4.56142	4.10654	0.415012	5.22648	-0.162458	0.0482947	-0.0231645	0.249361	0.259962	0.190231	-0.147458	-0.196356	-0.347915	0.27896	4	pnma2	nm_007257
chr15	62895836	62896342	+	38	1	62896061	0.318515	1.35287	2.63428	2.81574	3.03319	0.284916	2.05332	2.42974	2.67909	0.254678	2.34133	2.53412	2.28141	0.207506	2.53358	0.0562335	0.152335	0.259657	-0.303219	-0.0603733	0.0805647	-0.113852	0.000309162	-0.151251	-0.250417	4	mgc15885	nr_026897
chr5	121304864	121305230	+	60	10	121305060	0.254812	2.04434	2.63428	2.58866	2.02212	0.189944	2.68511	2.39293	2.59267	0.370441	2.41337	2.7645	2.90065	0.103753	2.55492	0.044132	0.0189271	-0.337407	0.0717031	-0.0945011	0.0211575	-0.0822319	0.113739	0.183098	0.0909025	4	srfbp1	nm_152546
chr9	114774328	114774973	+	51	8	114774646	0.191109	1.80383	9.21999	9.53717	7.51703	0.403631	8.21328	9.64534	9.67928	0.393594	8.93306	9.35322	8.40863	0.345844	8.94522	0.0436482	0.0924439	-0.250955	-0.123159	0.108715	0.113783	-0.00196352	0.0643451	-0.0892466	0.0714009	4	mir4668	nr_039814
chr2	28887849	28888605	+	52	8	28888202	0.350367	1.62345	4.59004	3.95111	4.26404	0.498603	6.42321	6.33206	6.56809	0.486204	4.10632	3.8703	4.33468	0.380428	4.93776	-0.10535	-0.321598	-0.211635	0.379437	0.358817	0.411616	-0.26601	-0.351413	-0.187931	0.596151	4	ppp1cb	nm_206876
chr2	161725765	161726447	+	59	9	161726077	0.445922	1.92409	2.9935	3.08823	2.19796	0.284916	4.15929	3.90231	3.75937	0.231526	2.1252	1.70477	1.82513	0.276675	2.86175	0.0649366	0.10988	-0.380733	0.539439	0.447432	0.39359	-0.429298	-0.747319	-0.6489	0.528792	4	tank	nm_004180
chr12	741556	741974	+	42	7	741627	0.350367	1.68358	4.4703	5.13191	4.39592	0.47486	5.79142	4.85949	4.6668	0.277831	5.07887	5.89759	4.69319	0.311259	4.99839	-0.161091	0.038032	-0.185297	0.212453	-0.0406588	-0.0990297	0.0230462	0.238664	-0.0908941	0.12704	4	ninj2	nm_016533
chr6	106047632	106048062	+	30	1	106047824	0.222961	1.14243	1.11757	1.63494	1.1869	0.332402	1.57948	1.39894	1.33954	0.509357	1.62092	1.24402	1.5644	0.380428	1.40964	-0.334951	0.213919	-0.248125	0.164125	-0.0109848	-0.0735802	0.201489	-0.180308	0.150284	0.149572	4	prep	nm_002726
chr2	37995130	37996126	+	87	12	37995930	0.286664	2.61555	8.9406	9.17385	6.98952	0.498603	8.10798	7.80463	9.93855	0.324136	7.96051	7.37199	7.26792	0.55335	8.17284	0.129534	0.16669	-0.225645	-0.0114944	-0.0665071	0.282198	-0.0379772	-0.148783	-0.169294	0.0445392	4	linc00211	nr_110011
chr18	8835346	8836002	+	54	2	8835628	0.382219	1.7437	1.75619	1.4987	1.49461	0.403631	1.52683	1.50939	1.29633	0.463052	1.29673	1.4744	1.1733	0.345844	1.44739	0.278998	0.0502598	0.0463224	0.0770873	0.0605117	-0.159014	-0.158568	0.0266765	-0.302882	-0.132332	4	mtcl1	nm_015210
chr14	62036328	62036946	+	64	10	62036702	0.254812	2.13453	6.34623	7.40266	6.11033	0.308659	5.42287	5.55896	5.35818	0.370441	4.75469	4.9761	5.67094	0.380428	5.73344	0.146499	0.368643	0.09185	-0.0803437	-0.0445862	-0.0976588	-0.270049	-0.204387	-0.0158136	-0.276527	4	rp11-47i22,2	nr_110417
chr11	86451790	86452434	+	49	7	86451838	0.382219	1.65351	12.0938	12.9887	12.4405	0.379888	11.2669	11.2652	12.1423	0.416746	10.9502	12.5324	11.5374	0.449597	11.913	0.0217207	0.124717	0.062498	-0.0804464	-0.0806723	0.027502	-0.121585	0.0731196	-0.0462207	-0.114184	4	prss23	nm_007173
chr3	145995548	145996200	+	73	10	145995859	0.350367	2.40511	3.31281	3.04281	2.32984	0.213687	2.57981	2.61381	2.46303	0.254678	2.1252	2.5802	3.12879	0.0691687	2.68626	0.302459	0.179808	-0.205367	-0.0583311	-0.0394405	-0.125162	-0.337997	-0.0581159	0.220009	-0.166611	4	plscr4	nm_001177304
chr11	128352201	128353204	+	75	12	128352568	0.477773	2.25479	5.58787	5.49523	4.96739	0.47486	7.00235	6.92109	6.91377	0.300984	5.00683	5.16039	5.0517	0.484181	5.78963	-0.0511705	-0.075291	-0.220981	0.274369	0.257529	0.256004	-0.209571	-0.165988	-0.196702	0.378448	4	ets1	nm_005238
chr6	139919086	139919684	+	43	7	139919394	0.222961	1.413	4.51021	6.49436	4.96739	0.118715	7.00235	6.33206	5.96313	0.208373	4.93479	5.48292	6.25759	0.276675	5.77164	-0.355787	0.170205	-0.216494	0.278856	0.133692	0.0470876	-0.225993	-0.0740381	0.116624	0.287237	4	rp11-12a2,3	nr_033919
chrx	38093203	38093908	+	38	3	38093487	0.286664	1.23262	2.15532	2.81574	2.19796	0.23743	2.52716	2.02479	2.29019	0.115763	1.4048	1.93515	1.46662	0.345844	2.09086	0.0438089	0.429417	0.0720707	0.273424	-0.0463256	0.131371	-0.573735	-0.111651	-0.511598	-0.0622759	4	srpx	nm_001170752
chr9	97662905	97663410	+	33	4	97663162	0.254812	1.29275	8.10242	8.31096	8.0885	0.261173	7.055	6.81064	7.21625	0.231526	6.41163	8.24742	7.56125	0.172922	7.53378	0.104978	0.141641	0.102497	-0.0947293	-0.145584	-0.062125	-0.232684	0.130567	0.00524966	-0.217184	4	mir2278	nr_031755
chr1	8271923	8272525	+	50	4	8272212	0.350367	1.65351	5.90718	6.53977	7.03348	0.451117	5.26492	5.81666	6.09276	0.416746	5.4751	6.91124	5.83389	0.311259	6.09722	-0.0456826	0.101088	0.206085	-0.21174	-0.067962	-0.00105558	-0.155267	0.180793	-0.0636932	-0.180749	4	slc45a1	nm_001080397
chr15	81481917	81482541	+	46	7	81482144	0.350367	1.44306	5.18874	5.85855	5.84658	0.332402	6.7391	6.47932	5.87671	0.532509	6.0154	5.57507	5.63834	0.311259	5.91309	-0.188528	-0.0133692	-0.0163202	0.188644	0.131929	-0.00890385	0.0247496	-0.0849224	-0.0686405	0.176629	4	il16	nm_001172128
chr10	64003001	64003583	+	50	4	64003225	0.318515	1.53326	5.34839	5.49523	3.95633	0.23743	4.36989	5.11719	4.45074	0.393594	4.79071	5.25254	4.59541	0.242091	4.8196	0.150191	0.189264	-0.284752	-0.141319	0.0864362	-0.114869	-0.00867468	0.124102	-0.0687197	-0.0748182	4	rtkn2	nm_145307
chr9	16704633	16705661	+	86	10	16705249	0.286664	2.58549	8.02259	7.53891	7.34119	0.189944	6.68645	6.7002	6.69772	0.185221	6.87989	5.98974	6.42054	0.172922	6.91969	0.21336	0.123647	0.0853058	-0.049467	-0.0465038	-0.0470382	-0.00832179	-0.208214	-0.108013	-0.188441	4	bnc2	nm_017637
chr1	56184297	56185020	+	98	8	56184666	0.350367	3.03645	12.453	12.1258	11.4294	0.118715	13.4782	13.1427	14.0868	0.324136	11.9227	12.6245	12.4826	0.276675	12.6384	-0.0213256	-0.0597327	-0.145067	0.092812	0.0564456	0.156529	-0.0840994	-0.00158571	-0.0179002	0.177304	4	mir4422	nr_039618
chr12	52674026	52674626	+	59	8	52674233	0.445922	2.13453	10.9363	12.4892	10.726	0.261173	11.6881	11.9278	10.8892	0.347289	11.7787	12.0716	11.3093	0.276675	11.5351	-0.0769143	0.114641	-0.104916	0.0190093	0.0482968	-0.0831375	0.0301414	0.0655866	-0.0285276	0.0171194	4	krt81	nm_002281
chr2	28619218	28620019	+	98	8	28619754	0.318515	3.09658	5.98701	5.85855	5.58282	0.094972	6.00201	5.154	4.88285	0.0463052	4.14234	5.20647	3.97617	0.138337	5.19914	0.203563	0.172271	0.102722	0.207174	-0.0125794	-0.0905476	-0.327825	0.00203339	-0.386891	-0.124836	4	flj31356	nr_103831
chr10	33482852	33483447	+	78	11	33483150	0.445922	2.52536	4.55013	5.4044	3.82445	0.308659	4.31724	4.3809	4.45074	0.254678	3.92622	4.00852	5.0517	0.345844	4.43492	0.0369979	0.285225	-0.213656	-0.0388002	-0.0176811	0.00513744	-0.175767	-0.145839	0.187859	-0.0533037	4	nrp1	nm_003873
chr8	80267877	80268329	+	28	2	80268123	0.0318515	0.871852	2.91368	3.45155	2.06608	0.213687	3.3169	2.94514	3.75937	0.162068	2.52143	2.16552	2.05327	0.138337	2.79922	0.0578186	0.302221	-0.438124	0.244814	0.0733153	0.425467	-0.150782	-0.370307	-0.447099	0.273893	4	stmn2	nm_007029
chr12	123610920	123611645	+	50	8	123611196	0.286664	1.56332	4.15099	3.81487	4.17613	0.569832	4.31724	3.6078	3.24083	0.555662	3.02571	2.90272	2.93324	0.380428	3.57439	0.215758	0.093935	0.224467	0.27241	0.0134214	-0.141334	-0.240423	-0.300292	-0.285201	-0.129887	4	pitpnm2	nm_020845
chr2	102080651	102081154	+	30	4	102080891	0.286664	1.38294	4.86943	5.90396	4.83551	0.284916	3.89604	4.6386	4.53716	0.347289	3.74612	4.00852	3.61767	0.415012	4.45034	0.129839	0.407769	0.119755	-0.191905	0.0597753	0.0278767	-0.248517	-0.150844	-0.298855	-0.253872	4	rfx8	nm_001145664
chrx	153305675	153306251	+	45	4	153306049	0.318515	1.38294	3.19307	4.85942	2.98923	0.23743	4.10664	4.45453	3.67294	0.185221	4.35847	4.28497	3.81322	0.207506	3.97028	-0.314295	0.291544	-0.409467	0.0487195	0.166034	-0.112303	0.134582	0.110046	-0.0582309	0.178223	4	mir718	nr_031757
chr8	65669133	65669901	+	70	7	65669516	0.382219	2.19466	1.7961	1.45328	1.93421	0.403631	1.63213	1.87753	1.5556	0.439899	1.69296	1.42832	1.1733	0.484181	1.61594	0.152499	-0.153054	0.259371	0.0143826	0.216465	-0.0548996	0.0671762	-0.178047	-0.461802	-0.0276228	4	cyp7b1	nm_004820
chr3	177196051	177196821	+	84	8	177196466	0.445922	2.58549	6.14666	6.44894	6.24221	0.142458	6.15996	5.89029	6.00634	0.162068	6.80785	7.09554	6.22499	0.207506	6.33587	-0.0437388	0.0255211	-0.0214851	-0.0406207	-0.105204	-0.0770552	0.103658	0.163371	-0.0254694	-0.061059	4	linc00578	nr_047568
chr1	208357276	208358237	+	96	14	208357742	0.222961	2.94626	4.19091	4.67775	3.47278	0.166201	4.42254	4.78586	3.58652	0.231526	4.71867	4.93002	4.56282	0.276675	4.37199	-0.0610265	0.0975278	-0.332198	0.0165853	0.130489	-0.285704	0.110092	0.173305	0.061638	0.0523559	4	plxna2	nm_025179
chr11	63435494	63435965	+	37	6	63435670	0.191109	1.23262	4.51021	4.814	4.04425	0.213687	3.58015	3.3501	4.6668	0.324136	4.43051	3.36347	3.97617	0.103753	4.08174	0.144011	0.238052	-0.0133128	-0.189165	-0.28498	0.193249	0.118288	-0.279233	-0.0378035	-0.216549	4	atl3	nm_015459
chr3	29426005	29426711	+	49	6	29426274	0.254812	1.59338	3.75186	3.58779	3.42882	0.23743	4.00134	2.68744	4.10505	0.300984	3.24183	3.59385	4.43246	0.449597	3.64783	0.0405679	-0.023941	-0.0893256	0.133446	-0.440803	0.170364	-0.170227	-0.0215087	0.281069	-0.0214315	4	rbms3	nm_014483
chr13	21653682	21654386	+	48	7	21653778	0.350367	1.77377	5.18874	4.85942	4.70364	0.23743	5.89671	4.23364	5.79029	0.138915	4.32245	4.4232	4.6606	0.172922	4.89763	0.0833003	-0.0113012	-0.0583074	0.267827	-0.210184	0.241551	-0.180236	-0.146995	-0.0715691	0.0951674	4	lats2	nm_014572
chr2	234395594	234396162	+	46	5	234395888	0.254812	1.56332	4.94926	5.54064	5.27511	0.332402	4.84373	4.71223	4.62359	0.370441	4.46653	5.39077	5.11688	0.276675	4.99097	-0.0121075	0.150733	0.0798799	-0.0432019	-0.0829106	-0.110308	-0.160166	0.111171	0.035944	-0.151642	4	usp40	nm_018218
chr16	12156364	12156952	+	47	8	12156768	0.350367	1.50319	3.83169	5.17732	4.13217	0.23743	5.15963	4.23364	3.84579	0.416746	3.99826	4.51535	4.56282	0.380428	4.38407	-0.194293	0.239934	-0.0853735	0.234994	-0.0503722	-0.188993	-0.132899	0.0425645	0.0576546	0.0117872	4	snx29	nm_032167
chr3	16101552	16102400	+	86	6	16101940	0.445922	2.826	6.78528	7.44808	6.24221	0.379888	8.89772	7.76782	7.73479	0.0694577	5.11489	5.16039	4.75837	0.345844	6.65662	0.0276185	0.162079	-0.0927322	0.418647	0.22272	0.216572	-0.380084	-0.367307	-0.484321	0.253658	4	galnt15	nm_054110
chr11	66738137	66738837	+	74	8	66738544	0.509625	2.34498	10.2577	10.5363	10.1546	0.189944	9.89806	8.83543	8.29653	0.347289	7.7804	9.07677	6.77905	0.276675	9.06832	0.177806	0.216462	0.163224	0.12631	-0.0375346	-0.128327	-0.22099	0.00134346	-0.419752	-0.199014	4	c11orf86	nm_001136485
chr4	186950772	186951551	+	66	9	186950938	0.318515	2.04434	5.42822	5.44981	4.79156	0.427374	6.7391	7.17879	6.52487	0.300984	5.40306	4.88395	5.73612	0.449597	5.79283	-0.0937891	-0.0880621	-0.273775	0.218288	0.309472	0.171682	-0.100492	-0.246221	-0.0141933	0.385022	4	tlr3	nm_003265
chr8	19148949	19149459	+	42	6	19149178	0.286664	1.38294	4.39047	4.2236	4.26404	0.261173	4.68578	4.01276	3.889	0.162068	4.68265	3.91637	4.59541	0.207506	4.29557	0.031528	-0.0243737	-0.0106258	0.125442	-0.0982542	-0.14345	0.124477	-0.133331	0.0973466	-0.0375969	4	sh2d4a	nm_001174160
chr16	29868213	29869063	+	122	6	29868672	0.41407	3.66779	3.03342	2.72491	2.3738	0.332402	3.94869	3.64461	3.41368	0.463052	3.42194	2.16552	3.0962	0.345844	3.09142	-0.0273249	-0.182063	-0.381072	0.353106	0.237497	0.143057	0.146544	-0.513554	0.00223022	0.441373	4	cdipt	nm_006319
chr3	87031995	87032382	+	28	3	87032248	0.191109	1.02217	7.82302	8.53804	7.51703	0.166201	9.31891	9.49809	8.98791	0.324136	9.07714	8.43172	8.79973	0.242091	8.66573	-0.147595	-0.0214169	-0.205159	0.10484	0.132315	0.0526638	0.0669159	-0.0394951	0.0221376	0.22133	4	vgll3	nm_016206
chr8	131074142	131074726	+	67	9	131074398	0.318515	2.28485	3.75186	3.95111	3.16506	0.308659	3.00101	3.64461	3.80258	0.486204	3.99826	3.27132	3.55248	0.207506	3.57092	0.0713086	0.145962	-0.174062	-0.25085	0.0294696	0.0906804	0.163077	-0.126423	-0.0074689	-0.0579698	4	asap1-it2	nr_045385
chr5	150472903	150473554	+	48	8	150473164	0.382219	1.59338	7.86294	8.49262	8.48413	0.546089	10.0034	8.06233	8.77185	0.277831	8.50081	9.39929	8.18049	0.276675	8.63976	-0.135922	-0.0247806	-0.0262242	0.211421	-0.099794	0.0218906	-0.0233903	0.121561	-0.0788037	0.106815	4	tnip1	nm_001252390
chr1	145009225	145010102	+	351	42	145009650	0.987398	10.823	16.5641	16.9852	16.3089	0.617318	17.8481	17.4868	16.377	0.856646	15.5608	16.6791	17.5669	0.760856	16.8197	-0.0220919	0.0141343	-0.0444909	0.085622	0.0561175	-0.0384763	-0.112231	-0.0121035	0.0627091	0.0519039	4	pde4dip	nm_001195260
chr19	47263053	47263737	+	57	6	47263444	0.350367	1.80383	4.07117	4.67775	4.43988	0.356145	4.31724	4.82267	5.22854	0.486204	3.16979	3.22525	3.29175	0.138337	4.13823	-0.023571	0.176803	0.101508	0.0610955	0.22082	0.337396	-0.384624	-0.359603	-0.330158	0.121524	4	strn4	nm_013403
chr17	40561486	40562076	+	50	8	40561707	0.318515	1.62345	5.26857	5.7223	4.70364	0.427374	6.00201	6.00073	5.40139	0.416746	4.25041	5.02217	4.69319	0.518765	5.22938	0.0107713	0.129956	-0.152863	0.198807	0.198499	0.0466905	-0.299039	-0.0583284	-0.156071	0.152044	4	ptrf	nm_012232
chr4	24780216	24780697	+	51	6	24780407	0.382219	1.83389	2.79394	3.54238	2.46172	0.403631	2.63246	2.20886	2.67909	0.347289	2.34133	2.67235	2.37919	0.415012	2.63459	0.0847219	0.42714	-0.0979131	-0.00116506	-0.254277	0.0241642	-0.170252	0.0205299	-0.14711	-0.215076	4	sod3	nm_003102
chr21	29817446	29817801	+	30	4	29817642	0.222961	1.29275	9.5393	9.628	7.47307	0.23743	8.31858	9.24039	9.80892	0.300984	9.0051	11.1501	8.8975	0.345844	9.229	0.0477091	0.061062	-0.304474	-0.149837	0.00177908	0.0879198	-0.0354324	0.272816	-0.0527735	0.0451881	4	linc00161	nr_026552
chr1	201682527	201683086	+	44	5	201682832	0.318515	1.53326	11.2157	10.3546	10.3744	0.356145	9.58216	10.1239	10.025	0.416746	10.9502	9.53752	9.97303	0.311259	10.2374	0.131667	0.0164301	0.019177	-0.0954246	-0.0160781	-0.0302491	0.0971094	-0.102162	-0.0377443	-0.103009	4	mir5191	nr_049823
chrx	11488279	11488776	+	29	4	11488542	0.127406	1.02217	2.71411	2.95198	2.154	0.071229	3.26425	2.72426	2.93835	0.0463052	2.66551	2.90272	2.73769	0.0691687	2.78365	-0.0365003	0.0847039	-0.36996	0.229773	-0.0311166	0.0780287	-0.0625688	0.0604268	-0.0240187	0.199481	4	arhgap6	nm_001287242
chr1	55894592	55895476	+	69	7	55894892	0.222961	2.07441	6.78528	7.221	6.37409	0.308659	6.7391	6.29524	5.66065	0.208373	5.4751	6.12797	5.4102	0.207506	6.23207	0.122696	0.212487	0.0325072	0.112845	0.0145507	-0.138743	-0.186827	-0.0243025	-0.204029	-0.126346	4	mir4422	nr_039618
chr19	11275474	11275963	+	31	1	11275712	0.0318515	0.992107	6.74536	7.08475	6.24221	0.261173	5.31757	6.1848	5.40139	0.416746	5.00683	5.02217	5.0517	0.276675	5.78409	0.221807	0.292629	0.109967	-0.121321	0.0966378	-0.0987596	-0.208191	-0.203778	-0.195321	-0.249282	4	spc24	nm_182513
chr6	3825985	3826702	+	66	5	3826312	0.445922	2.13453	11.2157	10.6725	9.01164	0.284916	9.79276	9.5349	9.20396	0.300984	8.17663	8.29349	9.06046	0.345844	9.44023	0.248621	0.177011	-0.067032	0.0528935	0.0143963	-0.0365666	-0.207316	-0.186842	-0.0592371	-0.109292	4	fam50b	nm_012135
chr12	58704535	58705187	+	49	4	58704856	0.127406	1.56332	2.79394	2.27075	2.02212	0.261173	3.6328	2.24567	2.20377	0.370441	1.98112	2.3959	2.28141	0.103753	2.42528	0.204151	-0.0949768	-0.262277	0.582932	-0.111002	-0.138178	-0.291832	-0.0175825	-0.0882222	0.162285	4	xrcc6bp1	nm_033276
chr9	110037152	110037776	+	100	14	110037415	0.191109	3.18677	5.14883	6.26728	5.4949	0.261173	6.00201	5.59577	6.00634	0.509357	4.86275	6.54264	5.27984	0.276675	5.68893	-0.143914	0.139683	-0.0500635	0.077289	-0.0238202	0.0783292	-0.226384	0.201716	-0.107664	0.0620308	4	rad23b	nm_002874
chr9	21688072	21688712	+	53	6	21688406	0.191109	1.92409	6.5458	7.17559	6.63784	0.332402	6.15996	6.77383	6.39524	0.393594	6.41163	7.04947	6.94201	0.380428	6.67682	-0.0285922	0.103936	-0.00844632	-0.11624	0.020811	-0.0621618	-0.0584697	0.0783537	0.0561925	-0.0748292	4	mtap	nm_002451
chr2	1656503	1657445	+	75	7	1656758	0.318515	2.28485	5.34839	6.3127	5.7147	0.403631	5.10698	5.22763	4.92606	0.277831	4.50255	4.33105	4.88874	0.242091	5.15098	0.0542596	0.293411	0.149831	-0.0123769	0.0213107	-0.0644106	-0.194104	-0.250131	-0.0753839	-0.184326	4	pxdn	nm_012293
chr8	129188806	129189776	+	115	9	129189204	0.509625	3.45734	6.22649	6.72143	5.45094	0.261173	5.89671	5.22763	5.22854	0.0926103	4.17836	4.9761	4.49764	0.138337	5.37821	0.211294	0.321644	0.019381	0.132786	-0.0409681	-0.0407162	-0.364186	-0.112111	-0.257957	-0.167072	4	mir1208	nr_031613
chr21	39661533	39662220	+	65	9	39661900	0.286664	2.04434	8.22216	8.58345	6.72576	0.094972	7.31824	7.51012	7.08662	0.277831	7.20408	7.23377	7.59384	0.207506	7.49756	0.133096	0.195137	-0.156724	-0.0349236	0.00241399	-0.0813235	-0.0576074	-0.0516738	0.0184086	-0.0951142	4	kcnj15	nm_170737
chr5	123036171	123037030	+	61	8	123036610	0.350367	1.92409	4.62995	4.63234	4.43988	0.284916	4.21194	3.23966	4.71001	0.393594	3.60204	4.19282	4.17172	0.276675	4.20337	0.13945	0.140193	0.0789734	0.00293679	-0.375706	0.164182	-0.222734	-0.00362649	-0.0109042	-0.189068	4	csnk1g3	nm_001044723
chr10	5465685	5466043	+	27	4	5465862	0.222961	0.992107	1.63645	1.95285	2.19796	0.189944	2.10597	1.39894	1.5556	0.115763	1.765	1.6587	1.79254	0.345844	1.78489	-0.125266	0.129746	0.300331	0.23865	-0.351498	-0.198364	-0.0161674	-0.105783	0.00616847	-0.205341	4	net1	nm_001047160
chr15	88162234	88162867	+	50	6	88162476	0.159258	1.59338	4.07117	4.04194	3.07715	0.142458	3.6328	3.57099	3.80258	0.208373	3.06173	3.3174	3.06361	0.172922	3.51548	0.211719	0.201326	-0.192131	0.0473577	0.0225994	0.113254	-0.199375	-0.0836716	-0.198491	-0.0125677	4	linc00052	nr_026869
chr3	106064123	106064902	+	55	8	106064488	0.382219	1.71364	4.82952	5.04108	4.79156	0.023743	4.05399	4.3809	4.62359	0.0926103	3.81816	4.83787	4.10654	0.138337	4.49813	0.102553	0.164405	0.0911675	-0.149984	-0.038099	0.0396861	-0.236448	0.105046	-0.131403	-0.168841	4	cblb	nm_170662
chr1	12538151	12538746	+	56	7	12538460	0.41407	1.7437	3.63212	3.81487	3.16506	0.688547	3.89604	3.90231	4.19148	0.370441	2.55745	3.5017	2.67251	0.345844	3.4815	0.0611003	0.131922	-0.137476	0.162299	0.164619	0.267748	-0.445006	0.00834327	-0.381515	0.179706	4	snora59b	nr_003022
chr15	39006722	39007435	+	59	8	39006787	0.286664	2.04434	10.7766	10.8542	10.9019	0.284916	12.5832	11.5965	11.1053	0.185221	9.22122	11.058	9.22342	0.242091	10.8134	-0.00491112	0.00543933	0.0117627	0.21868	0.100875	0.0384269	-0.229786	0.0322739	-0.229441	0.11523	4	c15orf53	nm_207444
chr8	22454766	22455340	+	38	2	22455058	0.254812	1.50319	10.5371	11.1267	10.5502	0.403631	11.4775	10.9707	10.025	0.416746	8.96908	11.1041	8.34345	0.345844	10.3449	0.0265675	0.105111	0.0283571	0.149898	0.0847351	-0.0453166	-0.205884	0.102173	-0.3102	0.00976032	4	c8orf58	nm_001013842
chr5	55374661	55375140	+	27	3	55374916	0.159258	0.871852	1.39697	1.8166	1.14294	0.427374	1.94802	1.61983	1.33954	0.277831	1.44082	1.2901	1.30366	0.311259	1.47761	-0.0809654	0.297979	-0.370516	0.398745	0.132576	-0.141523	-0.0363793	-0.195783	-0.180693	0.1811	4	flj31104	nr_102755
chr3	123372150	123372901	+	60	9	123372264	0.254812	1.98421	6.46597	7.35725	6.41805	0.23743	6.89705	7.2156	5.22854	0.277831	7.6003	7.27984	6.61609	0.311259	6.78652	-0.0698057	0.116494	-0.0805381	0.0233072	0.0884473	-0.376263	0.163384	0.101235	-0.0366928	-0.0768862	4	mylk	nm_053031
chrx	135137763	135138302	+	38	4	135138060	0.254812	1.20255	3.39264	2.9974	1.89025	0.166201	3.05366	2.65063	3.37047	0.138915	2.34133	3.04095	2.18364	0.276675	2.76899	0.293046	0.114348	-0.550787	0.141176	-0.0630268	0.283586	-0.242036	0.135159	-0.342629	0.168376	4	slc9a6	nm_006359
chr12	110546871	110547488	+	50	6	110547256	0.382219	1.68358	5.70761	5.90396	4.96739	0.308659	5.73877	5.55896	6.04955	0.231526	5.07887	5.11432	5.63834	0.449597	5.52864	0.0459625	0.0947582	-0.154437	0.0538153	0.00788907	0.129903	-0.122417	-0.112383	0.0283464	0.0684412	4	ift81	nm_001143779
chr9	137483964	137484670	+	37	2	137484408	0.254812	1.35287	7.06467	8.62887	6.33013	0.284916	7.31824	6.51613	5.18533	0.416746	6.44765	6.54264	6.84423	0.484181	6.76421	0.0627004	0.35125	-0.095687	0.113576	-0.0539063	-0.383485	-0.0691483	-0.0480479	0.0169674	-0.214026	4	col5a1	nm_000093
chr15	66124921	66125601	+	59	9	66125239	0.445922	1.86396	2.95359	3.04281	2.63755	0.403631	2.63246	2.54019	2.89514	0.347289	2.73755	2.48805	2.67251	0.345844	2.73332	0.111817	0.154752	-0.0514526	-0.0542402	-0.105719	0.0829819	0.00223219	-0.135639	-0.0324573	-0.0973645	4	rab11a	nm_001206836
chr17	57915132	57915476	+	58	9	57915304	0.41407	2.28485	12.4131	12.8071	11.825	0.166201	11.3196	11.1179	11.9263	0.324136	8.78897	10.7355	9.51674	0.0345844	11.1611	0.153377	0.198457	0.0833618	0.0203391	-0.00559569	0.0956598	-0.344715	-0.0560974	-0.229942	-0.108264	4	mir21	nr_029493
chr19	39141792	39142201	+	33	3	39142009	0.127406	1.0823	5.14883	5.17732	5.23115	0.403631	5.10698	5.33807	5.48781	0.439899	4.17836	5.06825	5.08429	0.518765	5.09123	0.0162302	0.0241922	0.0391138	0.00445563	0.0683052	0.108217	-0.285075	-0.00652733	-0.00196786	0.0338138	4	actn4	nm_004924
chr5	71748019	71748910	+	71	9	71748212	0.445922	2.22472	10.2977	9.90049	8.26433	0.23743	11.6355	11.302	11.7102	0.185221	9.43734	10.6433	9.32119	0.207506	10.2791	0.0026001	-0.0541436	-0.314745	0.178815	0.136861	0.188051	-0.123263	0.0502319	-0.141129	0.290005	4	znf366	nm_152625
chr1	234859536	234860676	+	105	12	234860027	0.254812	2.97632	6.42606	6.44894	6.85764	0.166201	6.6338	4.8963	6.09276	0.254678	5.97938	6.03582	4.92133	0.311259	6.03245	0.0911896	0.0963191	0.184968	0.137093	-0.301052	0.0143531	-0.0127468	0.000805803	-0.293695	-0.174028	4	linc01132	nr_038856
chr1	161972829	161973477	+	52	7	161973110	0.350367	1.71364	3.51238	3.9057	3.29694	0.403631	3.1063	3.49736	3.45689	0.393594	2.48541	3.40955	3.22657	0.380428	3.3219	0.08044	0.233572	-0.0108798	-0.0968086	0.0742572	0.0574655	-0.418526	0.0375718	-0.0420079	-0.0894062	4	olfml2b	nm_015441
chr7	42006644	42007117	+	33	5	42006889	0.318515	1.29275	1.1974	1.18079	1.36274	0.403631	1.00034	1.5462	1.1667	0.439899	0.864489	0.737199	0.847381	0.449597	1.10036	0.121932	0.101781	0.308531	-0.137491	0.490752	0.0844582	-0.348055	-0.577848	-0.376892	-0.0315081	4	inhba	nm_002192
chr6	113966601	113967287	+	54	5	113966932	0.159258	1.71364	6.14666	6.53977	6.72576	0.379888	6.52851	8.13596	7.30267	0.324136	4.75469	5.52899	4.75837	0.415012	6.26904	-0.0284423	0.0609954	0.101452	0.0585074	0.376067	0.22018	-0.398894	-0.181228	-0.397777	0.173583	4	marcks	nm_002356
chr13	95923599	95924001	+	47	8	95923727	0.286664	1.65351	4.11108	4.40526	4.08821	0.332402	5.63347	4.96993	5.0557	0.138915	3.53	4.14675	3.84581	0.311259	4.42069	-0.104754	-0.00504253	-0.112803	0.349752	0.168954	0.193639	-0.324604	-0.0922915	-0.200985	0.311648	4	abcc4	nm_005845
chr2	1733839	1734662	+	62	10	1734517	0.318515	1.89402	5.98701	4.76859	6.19825	0.142458	5.68612	6.29524	6.74093	0.254678	5.43908	6.35834	5.0191	0.103753	5.83252	0.0377163	-0.290558	0.0877421	-0.036675	0.110143	0.208829	-0.100757	0.124532	-0.216689	0.149132	4	pxdn	nm_012293
chr4	13893846	13894596	+	69	11	13894316	0.318515	2.1646	6.90502	7.90223	6.76972	0.23743	6.21261	6.14799	6.87056	0.509357	6.0154	6.81909	6.38795	0.0691687	6.67006	0.0499442	0.244559	0.0213956	-0.102501	-0.117587	0.042728	-0.149039	0.0318794	-0.0623471	-0.164419	4	linc01085	nr_033931
chr2	138726718	138727372	+	79	11	138727062	0.254812	2.4953	2.47463	2.81574	2.72547	0.213687	2.89571	2.90833	2.76551	0.231526	2.3053	2.9488	3.16138	0.311259	2.77787	-0.166769	0.0195306	-0.0274755	0.0599347	0.066209	-0.0064359	-0.269024	0.0861451	0.186575	0.0981404	4	hnmt	nm_001024075
chr10	28012307	28012827	+	38	5	28012582	0.254812	1.38294	3.39264	4.35985	2.90131	0.213687	3.2116	2.79789	3.41368	0.185221	3.27786	3.59385	3.25916	0.103753	3.35642	0.0154822	0.377353	-0.210222	-0.0636315	-0.262588	0.024401	-0.0341731	0.0986035	-0.0424255	-0.161477	4	mkx	nm_001242702
chr6	4352003	4352676	+	81	14	4352291	0.350367	2.52536	2.51454	3.40613	2.90131	0.403631	3.58015	3.53417	3.41368	0.463052	2.37735	3.3174	3.0962	0.691687	3.12677	-0.314376	0.123462	-0.107969	0.195346	0.176699	0.126653	-0.395321	0.0853788	-0.0141736	0.265861	4	rp3-400b16,1	nr_103764
chr9	131311608	131312231	+	57	5	131311862	0.41407	1.95415	2.59437	2.27075	2.41776	0.332402	3.1063	2.02479	1.9445	0.324136	2.08918	2.25767	2.02068	0.380428	2.30289	0.171939	-0.0202733	0.0702241	0.431754	-0.185676	-0.244047	-0.140507	-0.0286088	-0.188605	-0.073286	4	sptan1	nm_001130438
chr3	40918906	40919876	+	128	22	40919638	0.445922	3.84817	4.86943	5.04108	5.09927	0.23743	5.52817	5.154	5.74708	0.277831	5.58316	4.74572	4.6606	0.311259	5.15872	-0.08326	-0.0332822	-0.0167232	0.0997881	-0.00132109	0.155814	0.114068	-0.120387	-0.146499	0.129182	4	ctnnb1	nm_001098210
chr6	73571708	73572283	+	76	12	73572038	0.222961	2.34498	5.26857	6.13104	4.92343	0.284916	4.36989	5.96392	5.09891	0.185221	5.76326	5.16039	5.37761	0.276675	5.33967	-0.0193396	0.199381	-0.117086	-0.289154	0.15951	-0.0665616	0.110135	-0.0492687	0.0102155	-0.0863875	4	mir4282	nr_036244
chr10	74490244	74490857	+	54	4	74490599	0.191109	1.71364	4.4703	4.2236	4.57176	0.379888	5.31757	4.56497	4.71001	0.555662	4.50255	3.5017	4.23691	0.518765	4.45549	0.00478884	-0.077108	0.0371667	0.255185	0.0350234	0.0801473	0.0151592	-0.347529	-0.0725712	0.135169	4	mir4676	nr_039823
chr11	114165426	114166077	+	57	1	114165821	0.159258	1.77377	5.26857	5.08649	4.83551	0.023743	4.73843	5.08037	4.45074	0.277831	4.89877	5.43684	5.24725	0.172922	5.00478	0.0741052	0.0233653	-0.0496361	-0.0788959	0.0216288	-0.169259	-0.0308851	0.119464	0.068255	-0.0914536	4	nnmt	nm_006169
chr10	92689882	92691562	+	132	18	92691233	0.350367	3.21683	9.89852	9.17385	7.73682	0.118715	10.214	10.4921	9.98176	0.185221	8.57285	9.49144	8.18049	0.242091	9.30464	0.0892625	-0.0204231	-0.266209	0.134519	0.173277	0.101344	-0.118175	0.0286767	-0.185763	0.20217	4	ankrd1	nm_014391
chr6	25172956	25173454	+	33	4	25173252	0.222961	1.14243	8.98051	9.71883	8.13246	0.261173	9.26627	8.20959	9.03112	0.347289	9.04112	10.3208	8.08271	0.518765	8.97593	0.000735905	0.114721	-0.142371	0.0459262	-0.128752	0.00884287	0.0104393	0.20142	-0.151222	-0.0156897	4	cmahp	nr_027626
chr18	457026	458068	+	115	13	457382	0.509625	3.42728	1.83602	1.72577	2.46172	0.546089	2.21127	2.24567	2.07413	0.578815	1.51286	1.2901	1.5318	0.276675	1.87659	-0.0315374	-0.120873	0.391549	0.236758	0.259031	0.144392	-0.310841	-0.540634	-0.292883	0.133681	4	colec12	nm_130386
chr3	29376713	29377209	+	38	5	29377077	0.222961	1.50319	4.31065	4.58692	3.91237	0.189944	3.68545	4.08639	4.10505	0.277831	4.17836	4.51535	3.91099	0.276675	4.1435	0.057053	0.146676	-0.082808	-0.169012	-0.0200255	-0.0134499	0.0120875	0.123985	-0.0833169	-0.107803	4	rbms3	nm_014483
chr8	70556046	70556401	+	37	6	70556164	0.254812	1.26268	2.95359	2.81574	2.50568	0.284916	3.15895	3.57099	3.5001	0.555662	2.62949	3.36347	2.73769	0.380428	3.02619	-0.0350319	-0.10399	-0.272302	0.0619452	0.238821	0.209894	-0.20272	0.152449	-0.144541	0.307328	4	sulf1	nm_001128205
chr4	114366352	114366880	+	54	8	114366637	0.222961	1.77377	6.74536	6.72143	5.67074	0.118715	6.26526	4.67541	5.70386	0.208373	5.07887	5.57507	5.0517	0.311259	5.72086	0.237665	0.232538	-0.0126945	0.131143	-0.291137	-0.00429169	-0.171722	-0.0372415	-0.179463	-0.207265	4	mir8082	nr_107049
chr11	130642215	130642983	+	64	6	130642602	0.382219	2.10447	2.79394	2.49783	2.19796	0.47486	2.05332	1.87753	3.19762	0.509357	1.5849	2.11945	1.75995	0.415012	2.23139	0.324358	0.162734	-0.0217754	-0.119983	-0.249106	0.519058	-0.493552	-0.0742527	-0.34241	-0.105116	4	c11orf44	nm_001271983
chr1	14108501	14108876	+	48	6	14108643	0.350367	1.83389	3.8716	2.86115	2.72547	0.427374	2.68511	3.42373	2.67909	0.578815	2.73755	2.71842	3.03102	0.622518	2.97035	0.382297	-0.0540367	-0.124126	-0.145651	0.204936	-0.14889	-0.117747	-0.127863	0.02917	-0.0979129	4	prdm2	nm_001007257
chr5	15452844	15453262	+	29	2	15453070	0.159258	0.962043	1.75619	1.99826	2.11004	0.308659	1.68478	1.61983	2.07413	0.416746	1.90908	1.56655	1.69476	0.345844	1.82374	-0.0544488	0.13185	0.210375	-0.114341	-0.171056	0.185611	0.065981	-0.219308	-0.105814	-0.129187	4	fbxl7	nm_012304
chr3	134045543	134046176	+	59	5	134045829	0.350367	1.92409	11.4152	11.6263	9.09956	0.261173	12.2146	13.7317	13.093	0.416746	10.3018	10.8737	11.6678	0.518765	11.5582	-0.0179553	0.00847264	-0.345047	0.0796943	0.248598	0.179876	-0.166014	-0.0880735	0.0136162	0.287566	4	mir6827	nr_106885
chr9	117614526	117614826	+	39	6	117614616	0.127406	1.44306	4.07117	4.72317	4.65968	0.427374	6.15996	4.78586	5.22854	0.324136	4.17836	5.11432	4.6606	0.415012	4.84241	-0.250282	-0.0359686	-0.055494	0.347197	-0.0169466	0.110685	-0.212786	0.0788183	-0.0552092	0.260893	4	tnfsf15	nm_005118
chr7	40847825	40848485	+	58	9	40848164	0.41407	1.92409	9.5393	10.3092	9.71499	0.189944	10.3719	11.302	10.2842	0.162068	9.90561	10.7815	9.87525	0.415012	10.2316	-0.101071	0.01091	-0.074742	0.019654	0.14355	0.00740909	-0.0467089	0.0755371	-0.0511367	0.111839	4	ac005029,1	nr_110831
chr11	61739930	61740576	+	79	11	61740136	0.509625	2.64562	9.06034	8.31096	8.8358	0.47486	8.10798	7.51012	7.82121	0.555662	6.77183	7.78667	6.06204	0.242091	7.80744	0.214716	0.0901663	0.178512	0.0544936	-0.0560142	0.00254213	-0.205303	-0.00384329	-0.365047	-0.160791	4	fth1	nm_002032
chr3	124781696	124782454	+	79	10	124782081	0.286664	2.4953	3.95143	4.31443	4.65968	0.593575	3.84339	4.49134	3.75937	0.185221	3.85418	3.686	4.00877	0.415012	4.06318	-0.0402347	0.0865635	0.197622	-0.0802269	0.144539	-0.112119	-0.0761833	-0.140553	-0.0194498	-0.0972525	4	heg1	nm_020733
chr3	112323199	112323874	+	51	2	112323479	0.191109	1.80383	2.19524	2.86115	2.68151	0.189944	3.00101	2.65063	2.67909	0.416746	2.37735	2.99487	2.50955	0.345844	2.66115	-0.277676	0.104543	0.0109945	0.173394	-0.0057177	0.00968942	-0.162701	0.170442	-0.0846223	0.113168	4	loc100506621	nr_109779
chr4	122611902	122612351	+	42	6	122612046	0.286664	1.59338	3.5922	3.13364	3.1211	0.189944	3.7381	2.94514	2.67909	0.231526	2.37735	2.81057	2.63992	0.207506	3.00412	0.257925	0.0608959	0.0551125	0.315359	-0.0286065	-0.165202	-0.337593	-0.0960804	-0.186451	-0.0841278	4	anxa5	nm_001154
chr9	118706551	118707376	+	135	15	118707030	0.477773	4.14881	8.22216	10.2184	9.09956	0.189944	9.68746	9.5349	9.46323	0.300984	8.53683	8.20134	7.98494	0.138337	8.99431	-0.129496	0.184084	0.0167835	0.107105	0.0842049	0.0733195	-0.0753123	-0.133153	-0.171732	0.0644195	4	linc00474	nr_024032
chr1	215196053	215197052	+	75	8	215196450	0.477773	2.25479	4.27073	5.08649	4.22009	0.261173	6.26526	4.93311	5.22854	0.370441	4.43051	4.88395	5.27984	0.380428	4.95539	-0.214515	0.0376719	-0.231727	0.338375	-0.00649986	0.07741	-0.161527	-0.0209517	0.0914948	0.272619	4	kcnk2	nm_001017424
chr1	183811513	183812011	+	33	3	183811656	0.286664	1.23262	4.15099	4.04194	3.42882	0.261173	3.00101	4.08639	3.41368	0.231526	2.80959	3.17917	3.19398	0.242091	3.4784	0.255034	0.216627	-0.0207103	-0.212976	0.232403	-0.0270958	-0.308062	-0.129771	-0.123069	-0.152873	4	apobec4	nm_203454
chr12	123612347	123612836	+	33	5	123612626	0.127406	1.11236	1.95576	1.27162	1.80233	0.308659	1.52683	1.76709	1.64202	0.347289	1.22469	1.52047	1.27107	0.276675	1.55354	0.332165	-0.288891	0.2143	-0.0250241	0.185811	0.0799115	-0.343141	-0.0310408	-0.289516	-0.00562533	4	pitpnm2	nm_020845
chr2	106071304	106072625	+	103	18	106072388	0.254812	3.00638	6.90502	6.99392	5.45094	0.189944	6.47586	6.92109	6.56809	0.324136	4.97081	4.69965	5.0191	0.276675	6.0005	0.202563	0.22102	-0.138576	0.109989	0.205916	0.130391	-0.2716	-0.35253	-0.257652	0.0537632	4	fhl2	nm_201557
chr15	50147873	50148653	+	66	7	50148240	0.477773	2.1646	3.75186	4.45068	3.42882	0.166201	3.00101	3.90231	4.58038	0.393594	3.31388	3.17917	3.55248	0.207506	3.68451	0.0261328	0.272553	-0.103761	-0.296026	0.0828576	0.313993	-0.152953	-0.212822	-0.0526447	-0.0313667	4	dtwd1	nm_020234
chr16	66223684	66224475	+	118	11	66224120	0.350367	3.66779	4.43039	4.04194	4.04425	0.213687	6.26526	5.19081	6.00634	0.162068	3.81816	3.8703	4.33468	0.518765	4.6669	-0.0750333	-0.207416	-0.206594	0.424908	0.153495	0.364021	-0.289588	-0.270022	-0.10654	0.477156	4	cdh5	nm_001795
chr14	85937998	85938518	+	43	7	85938221	0.318515	1.62345	2.59437	3.13364	2.98923	0.071229	2.73776	2.54019	3.1112	0.254678	2.59347	3.17917	1.98809	0.345844	2.76301	-0.0908577	0.181598	0.11353	-0.0132459	-0.121308	0.171229	-0.0913595	0.202409	-0.474861	-0.0558654	4	flrt2	nm_013231
chr21	47469094	47469738	+	50	6	47469474	0.286664	1.50319	7.7432	7.76598	6.50596	0.451117	6.05466	5.6694	5.74708	0.486204	5.36704	5.62114	5.89908	0.449597	6.26373	0.305908	0.310147	0.0547417	-0.0489748	-0.143825	-0.124193	-0.222895	-0.156157	-0.0865319	-0.329263	4	col6a2	nm_001849
chr9	91363628	91363928	+	30	4	91363776	0.286664	1.20255	1.4768	2.04368	1.53857	0.379888	1.94802	2.42974	2.37661	0.463052	1.36877	1.6587	1.66217	0.345844	1.83367	-0.312267	0.156432	-0.253145	0.0872725	0.406067	0.374168	-0.421852	-0.144686	-0.141668	0.425496	4	mir4289	nr_036252
chr16	15684740	15685151	+	52	8	15684934	0.127406	1.68358	2.71411	2.407	2.59359	0.332402	3.05366	2.65063	2.46303	0.208373	2.98969	3.59385	2.28141	0.587934	2.74966	-0.0187757	-0.192019	-0.0843024	0.151282	-0.0529203	-0.15882	0.120742	0.386274	-0.269329	0.0782131	4	mir6506	nr_106761
chr5	172881676	172882644	+	92	7	172882074	0.350367	2.76587	7.58354	8.03847	7.47307	0.189944	8.95037	8.17277	8.64222	0.486204	8.06857	9.12284	7.72421	0.276675	8.19734	-0.112284	-0.0282345	-0.133455	0.126792	-0.00433023	0.0762459	-0.0228434	0.154327	-0.085769	0.15756	4	mir8056	nr_107023
chr15	59587372	59588823	+	174	13	59588470	0.222961	4.84028	10.3775	10.8088	10.1546	0.284916	9.89806	10.4921	9.24717	0.254678	9.5454	10.6433	8.99528	0.345844	10.018	0.0508593	0.109608	0.0195336	-0.0173798	0.0667028	-0.115513	-0.069719	0.0873506	-0.155357	-0.0820636	4	myo1e	nm_004998
chr1	85796050	85796626	+	53	7	85796181	0.318515	2.07441	10.577	9.08302	9.80291	0.261173	9.21362	10.308	10.3275	0.486204	10.2658	12.6245	10.69	0.172922	10.3214	0.0353009	-0.184392	-0.0743546	-0.163797	-0.00187141	0.000848191	-0.00778853	0.290595	0.0506314	0.019542	4	bcl10	nm_003921
chr12	125259142	125259544	+	24	3	125259368	0.222961	1.02217	2.6742	3.76945	2.76943	0.403631	2.79041	2.61381	2.37661	0.324136	2.59347	2.9488	2.11845	0.449597	2.7394	-0.0347562	0.460493	0.0157276	0.026615	-0.0677051	-0.204957	-0.0789794	0.106265	-0.370851	-0.22917	4	scarb1	nm_005505
chr2	43191519	43192102	+	36	3	43191880	0.159258	1.23262	7.22432	7.31183	8.17641	0.427374	8.42388	8.32003	7.21625	0.324136	6.80785	8.20134	7.52866	0.345844	7.69006	-0.0901333	-0.0727631	0.0884727	0.131489	0.113593	-0.0917459	-0.175796	0.0928643	-0.0306031	0.0759198	4	ac016735,2	nr_110585
chr1	86077295	86077996	+	54	8	86077744	0.382219	1.77377	10.5371	11.9442	10.726	0.118715	11.8461	11.3388	11.2781	0.254678	11.2384	10.5972	10.5923	0.484181	11.122	-0.0779365	0.102888	-0.0523002	0.0909904	0.0278491	0.0201044	0.0150126	-0.0697305	-0.0704077	0.055431	4	cyr61	nm_001554
chr4	158972400	158973135	+	74	7	158972730	0.350367	2.34498	5.42822	5.08649	5.53886	0.142458	5.00168	5.26444	5.61744	0.208373	5.15092	7.51022	4.98651	0.311259	5.50942	-0.0214212	-0.11523	0.00768902	-0.139489	-0.0656195	0.0280128	-0.0970717	0.446954	-0.143869	-0.0160444	4	fam198b	nm_016613
chr22	29107881	29108742	+	78	9	29108270	0.159258	2.40511	6.50588	7.40266	5.23115	0.213687	5.58082	6.14799	6.65451	0.231526	5.6552	7.27984	6.5835	0.311259	6.33795	0.0377284	0.224028	-0.276889	-0.183539	-0.0439022	0.0703158	-0.164438	0.199891	0.0548388	-0.047331	4	chek2	nm_145862
chr11	67121974	67122415	+	27	4	67122147	0.191109	1.05223	7.38398	7.35725	6.63784	0.498603	6.31791	7.2156	6.78414	0.463052	5.54714	6.68087	6.22499	0.484181	6.6833	0.143837	0.138605	-0.00984669	-0.081114	0.110559	0.0216052	-0.268817	-0.000525386	-0.102489	-0.0738484	4	pold4	nr_046413
chr18	42834676	42835191	+	39	6	42834903	0.254812	1.62345	7.86294	8.17472	8.17641	0.569832	8.95037	9.75579	9.11754	0.347289	6.98796	7.09554	7.59384	0.55335	8.19057	-0.0588951	-0.00279454	-0.00249496	0.127984	0.252295	0.154681	-0.229093	-0.20705	-0.109134	0.199715	4	slc14a2	nm_001242692
chr4	122649205	122649827	+	54	8	122649504	0.286664	2.04434	7.18441	6.26728	5.75866	0.308659	6.68645	5.96392	6.17919	0.254678	5.36704	5.11432	6.09463	0.55335	6.06843	0.243546	0.0465164	-0.0755912	0.139917	-0.0250641	0.026093	-0.177198	-0.246781	0.00621415	-0.0245083	4	anxa5	nm_001154
chr11	33712260	33712601	+	36	6	33712364	0.286664	1.80383	7.38398	8.17472	6.94556	0.261173	6.37056	6.33206	6.04955	0.393594	6.55571	6.72694	6.32277	0.207506	6.76243	0.126857	0.273628	0.0385493	-0.0861214	-0.0948666	-0.160713	-0.0447889	-0.00758995	-0.0969847	-0.260245	4	c11orf91	nm_001166692
chr17	67963976	67964702	+	56	6	67964490	0.222961	1.71364	1.39697	1.72577	1.49461	0.142458	2.26392	1.17806	1.42597	0.300984	1.51286	1.42832	1.27107	0.311259	1.52195	-0.123621	0.181323	-0.0261483	0.5729	-0.369511	-0.0939811	-0.00864583	-0.0915979	-0.259875	0.0259518	4	ac004562,1	nr_110874
chr1	39967193	39967708	+	45	0	39967463	0.222961	1.53326	0.558787	0.499566	0.263755	0.664804	0.842388	0.478586	0.475322	0.555662	0.324183	0.322525	0.325916	0.345844	0.454559	0.297833	0.136209	-0.785266	0.890018	0.0743109	0.0644386	-0.487656	-0.495057	-0.479967	0.459997	4	bmp8a	nm_181809
chr17	57863812	57864509	+	63	8	57864148	0.41407	1.98421	10.617	11.1721	10.5063	0.189944	10.3719	9.90304	11.2781	0.0926103	7.70836	8.47779	9.06046	0.0691687	9.89944	0.100952	0.174483	0.0858291	0.0672609	0.000524781	0.188104	-0.360923	-0.223659	-0.127763	-0.0351246	4	mir21	nr_029493
chr11	35121331	35121959	+	81	4	35121660	0.222961	2.94626	5.30848	5.76772	4.5278	0.403631	5.79142	5.154	4.79643	0.370441	4.53857	6.17404	4.98651	0.276675	5.22722	0.0222553	0.141957	-0.207233	0.147872	-0.0203509	-0.124082	-0.203806	0.240172	-0.0680122	0.0154869	4	cd44	nm_001202555
chr6	135148184	135148609	+	47	8	135148292	0.222961	1.86396	2.27506	1.58953	1.84629	0.189944	1.73742	2.20886	1.98771	0.277831	1.90908	1.75085	2.05327	0.276675	1.92867	0.238297	-0.279011	-0.0629826	-0.150659	0.195691	0.0434978	-0.0147317	-0.139556	0.0903138	0.0640753	4	aldh8a1	nm_001193480
chr1	56055416	56056101	+	56	7	56055535	0.382219	1.92409	9.97835	11.7171	9.14352	0.189944	12.6358	12.1119	10.4139	0.185221	10.0857	10.1826	9.2886	0.242091	10.6175	-0.0895703	0.142172	-0.215622	0.251076	0.189982	-0.0279362	-0.0741306	-0.060342	-0.192909	0.192047	4	mir4422	nr_039618
chr19	6273659	6274403	+	50	5	6274025	0.254812	1.59338	7.4638	8.08389	6.28617	0.213687	7.31824	8.79862	7.08662	0.254678	6.59173	6.35834	6.68128	0.276675	7.18541	0.0548405	0.169979	-0.192889	0.026427	0.292206	-0.0199729	-0.124413	-0.176419	-0.104947	0.0889101	4	mllt1	nm_005934
chr9	117507582	117508242	+	45	7	117507880	0.222961	1.35287	2.55446	2.63408	2.41776	0.332402	2.10597	2.0616	2.80872	0.370441	2.05316	2.11945	1.40144	0.657103	2.23963	0.189759	0.234039	0.110412	-0.088773	-0.119493	0.326656	-0.12541	-0.0795689	-0.676349	-0.138607	4	tnfsf15	nm_001204344
chr2	86299192	86300001	+	78	8	86299610	0.382219	2.43517	3.51238	3.04281	3.60466	0.451117	3.15895	3.31329	2.98157	0.324136	2.73755	2.53412	2.73769	0.345844	3.06922	0.194574	-0.012469	0.231988	0.041573	0.110389	-0.041804	-0.164989	-0.276388	-0.164913	-0.101312	4	polr1a	nm_015425
chr2	208028032	208028632	+	38	6	208028390	0.0955546	1.50319	5.86727	7.90223	5.67074	0.284916	6.52851	6.00073	5.40139	0.347289	5.4751	6.54264	5.70353	0.311259	6.12135	-0.0611604	0.36841	-0.110312	0.0929035	-0.0287114	-0.180519	-0.160964	0.0960245	-0.101995	-0.104422	4	klf7	nm_003709
chr11	14443903	14444407	+	36	6	14444212	0.191109	1.32281	4.35056	4.95025	4.96739	0.379888	4.58048	5.44851	4.45074	0.324136	5.04285	5.06825	4.36727	0.311259	4.80292	-0.142712	0.0435873	0.0485758	-0.0684129	0.18195	-0.109867	0.0703277	0.0775735	-0.13718	0.0180732	4	rras2	nm_001177314
chr20	30301073	30301526	+	41	6	30301284	0.222961	1.98421	10.0582	10.4001	9.49519	0.332402	12.004	11.1915	12.0559	0.370441	10.8782	11.4727	9.97303	0.276675	10.8365	-0.107534	-0.0593109	-0.190633	0.147616	0.0465068	0.153836	0.00553182	0.0822981	-0.119799	0.235146	4	bcl2l1	nm_001191
chr14	100497793	100498676	+	61	10	100498041	0.286664	1.92409	5.38831	6.04021	5.4949	0.427374	5.31757	5.22763	5.0557	0.393594	4.71867	5.62114	6.48573	0.311259	5.48332	-0.025217	0.139549	0.00304484	-0.0442812	-0.0688922	-0.117139	-0.216669	0.0358148	0.242219	-0.115896	4	evl	nm_016337
chr3	190251333	190251866	+	37	3	190251603	0.0955546	1.35287	7.98268	7.03934	6.19825	0.261173	7.42354	5.77984	5.87671	0.231526	5.94336	6.45049	5.24725	0.484181	6.43794	0.310273	0.128841	-0.0547383	0.205508	-0.155569	-0.131591	-0.11532	0.00281032	-0.295039	-0.155342	4	il1rap	nm_002182
chr8	123613691	123614406	+	60	4	123614049	0.318515	1.89402	4.55013	4.63234	3.64862	0.166201	4.63313	4.04957	4.75322	0.231526	3.49398	4.46927	4.13913	0.172922	4.26327	0.0939477	0.119782	-0.22461	0.120029	-0.0741894	0.156946	-0.287088	0.0680806	-0.0426306	0.071222	4	zhx2	nm_014943
chr11	128077673	128078345	+	59	8	128078018	0.318515	2.07441	6.18657	6.6306	7.07743	0.356145	8.52918	7.10516	6.39524	0.486204	6.15949	7.27984	6.64868	0.518765	6.89024	-0.155414	-0.0554149	0.0386713	0.307851	0.0443115	-0.107556	-0.161745	0.0793521	-0.0514864	0.138921	4	ets1	nm_005238
chr16	54681432	54682076	+	63	10	54681805	0.191109	2.1646	2.59437	2.13451	2.32984	0.332402	2.68511	2.87151	2.46303	0.393594	2.44939	2.30375	1.59699	0.518765	2.38094	0.12385	-0.157629	-0.0313038	0.173448	0.270278	0.0489017	0.0408865	-0.0475511	-0.57618	0.185903	4	crnde	nr_034106
chr20	42212480	42212944	+	32	4	42212708	0.286664	1.23262	1.23731	1.36245	1.4067	0.403631	1.26358	2.02479	1.9445	0.532509	1.04459	1.33617	1.30366	0.345844	1.43597	-0.214816	-0.0758224	-0.0297191	-0.18451	0.495741	0.43737	-0.45909	-0.103921	-0.139457	0.356319	4	ift52	nm_016004
chr21	39654852	39655343	+	60	9	39655136	0.318515	2.01428	4.27073	4.58692	4.22009	0.332402	4.42254	4.56497	6.13598	0.324136	4.50255	5.02217	4.23691	0.311259	4.66254	-0.126632	-0.0235885	-0.143844	-0.076242	-0.0305097	0.396177	-0.050374	0.107195	-0.138104	0.194497	4	kcnj15	nm_170737
chr1	12524545	12525151	+	64	7	12524840	0.445922	2.1646	3.07333	3.76945	3.60466	0.379888	5.21227	4.56497	4.96928	0.370441	3.31388	3.59385	3.0962	0.415012	3.91088	-0.347689	-0.0531367	-0.11763	0.414421	0.223114	0.345544	-0.238972	-0.121963	-0.336993	0.500512	4	snora59b	nr_003022
chr10	123283370	123283900	+	35	4	123283618	0.318515	1.413	1.27723	1.40787	1.1869	0.356145	1.68478	1.36213	1.1667	0.370441	0.684387	0.645049	1.01034	0.311259	1.15838	0.140914	0.28141	0.0350947	0.540454	0.233761	0.0103306	-0.759217	-0.844621	-0.197263	0.109042	4	fgfr2	nm_023029
chr18	3453644	3454297	+	58	6	3454006	0.191109	1.83389	4.98917	5.7223	4.39592	0.189944	4.79108	4.6386	4.23469	0.300984	3.74612	3.77815	3.65026	0.345844	4.43848	0.168736	0.366531	-0.0138988	0.110286	0.063625	-0.0678093	-0.244667	-0.232386	-0.282066	-0.138422	4	tgif1	nm_173211
chr12	113660908	113661208	+	25	4	113661021	0.222961	0.931979	2.51454	3.17906	3.25298	0.213687	2.84306	3.23966	2.50624	0.254678	2.66551	2.67235	2.7051	0.103753	2.84206	-0.176638	0.161664	0.194828	0.000509138	0.188907	-0.181408	-0.0925239	-0.0888272	-0.0712518	-0.0572821	4	tpcn1	nm_017901
chr20	48210570	48211459	+	57	6	48210856	0.159258	1.71364	9.02043	9.71883	8.92372	0.617318	8.26593	8.13596	7.69157	0.393594	6.95193	7.74059	7.85457	0.449597	8.25595	0.127761	0.235349	0.112211	0.00174309	-0.0211218	-0.102155	-0.24802	-0.0929901	-0.0719012	-0.198952	4	ptgis	nm_000961
chr6	90928101	90928526	+	38	6	90928328	0.350367	2.10447	5.10891	5.76772	5.67074	0.261173	4.42254	4.78586	4.2779	0.115763	3.67408	4.46927	4.2695	0.0691687	4.71628	0.115367	0.290351	0.265888	-0.0927752	0.0211285	-0.140747	-0.360266	-0.0776096	-0.143583	-0.294667	4	bach2	nm_021813
chr4	186696341	186696882	+	45	5	186696596	0.286664	1.53326	3.8716	3.67862	3.78049	0.166201	4.68578	4.67541	5.70386	0.300984	3.7101	4.00852	3.61767	0.276675	4.19245	-0.114865	-0.188628	-0.14922	0.160496	0.1573	0.444146	-0.176336	-0.064724	-0.212735	0.404885	4	sorbs2	nm_001145673
chr1	183994380	183994882	+	43	7	183994701	0.254812	1.56332	2.23515	3.17906	2.11004	0.261173	2.00067	2.39293	2.76551	0.578815	2.23326	2.53412	2.37919	0.622518	2.42555	-0.117939	0.390288	-0.201039	-0.277827	-0.0195332	0.189235	-0.119157	0.0631756	-0.0278426	-0.0598118	4	colgalt2	nm_015101
chr15	75912401	75913483	+	67	8	75913140	0.191109	2.01428	8.0625	7.76598	8.00058	0.23743	7.00235	7.76782	7.04341	0.601967	6.19551	7.09554	6.5835	0.345844	7.27969	0.147351	0.0932918	0.136228	-0.0560377	0.0936324	-0.0476028	-0.232654	-0.0369634	-0.145021	-0.12896	4	snupn	nm_001042581
chr11	61771912	61772292	+	31	2	61772202	0.0955546	1.17249	2.95359	3.36072	3.3409	0.332402	3.68545	3.64461	2.46303	0.138915	2.52143	2.71842	2.11845	0.311259	2.97851	-0.0121217	0.174178	0.165646	0.307248	0.291175	-0.274156	-0.240351	-0.131822	-0.49158	-0.00114494	4	fth1	nm_002032
chr17	46588007	46588731	+	55	5	46588420	0.0637031	1.83389	2.23515	2.22534	1.93421	0.356145	1.84272	1.87753	2.67909	0.254678	2.23326	2.0273	1.9555	0.55335	2.11223	0.0816028	0.075257	-0.127027	-0.196929	-0.169934	0.342973	0.0803852	-0.0592104	-0.111235	-0.0179073	4	hoxb1	nm_002144
chr4	184557978	184558589	+	65	10	184558303	0.254812	2.01428	5.70761	6.26728	5.80262	0.261173	5.79142	5.96392	5.01249	0.324136	5.8353	6.26619	6.81164	0.345844	5.93983	-0.0575338	0.0774185	-0.0337179	-0.0365056	0.00583804	-0.244895	-0.0256142	0.0771677	0.197581	-0.0872431	4	rwdd4	nm_152682
chr2	28550927	28551537	+	68	8	28551222	0.350367	2.25479	1.7961	2.45242	1.45065	0.332402	1.89537	2.42974	1.85808	0.486204	0.828469	1.19795	1.20589	0.55335	1.67941	0.0969169	0.546251	-0.211249	0.174529	0.532851	0.145858	-1.01943	-0.487386	-0.477856	0.14044	4	ac093690,1	nr_038319
chr10	14105895	14106465	+	41	4	14106224	0.286664	1.35287	3.47246	3.76945	2.81339	0.308659	3.36955	3.20284	3.93221	0.509357	2.44939	3.3174	2.93324	0.380428	3.2511	0.0950302	0.213425	-0.20862	0.0516266	-0.0215766	0.27441	-0.408509	0.0291218	-0.148433	0.0682083	4	frmd4a	nm_018027
chr10	24754180	24754783	+	46	6	24754524	0.286664	1.53326	9.97835	9.40092	9.0556	0.403631	8.10798	7.65737	7.95084	0.324136	6.91591	8.33957	6.94201	0.587934	8.26095	0.272493	0.186495	0.132502	-0.0269649	-0.109458	-0.0552003	-0.256388	0.0136646	-0.250955	-0.261038	4	kiaa1217	nm_001282770
chr21	43050347	43051002	+	42	4	43050745	0.191109	1.32281	2.75402	2.27075	2.54963	0.522346	2.42186	2.3193	1.85808	0.370441	1.62092	2.3959	1.82513	0.518765	2.22396	0.308413	0.030044	0.197163	0.12299	0.0605617	-0.259318	-0.456317	0.107438	-0.285129	-0.203795	4	linc00111	nr_024367
chr6	89745087	89746014	+	65	8	89745686	0.477773	1.95415	3.75186	3.99653	3.38486	0.379888	4.26459	4.01276	3.97542	0.300984	3.31388	3.04095	3.12879	0.484181	3.65218	0.0388471	0.129989	-0.109662	0.223648	0.135836	0.122349	-0.140239	-0.264238	-0.223152	0.140886	4	pnrc1	nm_006813
chr9	89410757	89411251	+	49	7	89410982	0.286664	1.53326	4.43039	5.13191	4.7476	0.332402	4.52783	4.85949	5.31496	0.254678	3.7101	3.54777	4.10654	0.345844	4.48629	-0.0180896	0.193973	0.0816752	0.0132992	0.115282	0.244538	-0.274064	-0.338609	-0.127599	0.0385203	4	gas1	nm_002048
chr1	33564710	33565421	+	65	8	33565028	0.382219	2.07441	8.6612	8.53804	8.13246	0.261173	8.52918	7.731	9.20396	0.0926103	7.70836	9.21499	7.10497	0.138337	8.3138	0.0590605	0.0383973	-0.0318162	0.0368991	-0.104852	0.146748	-0.109083	0.148476	-0.226679	0.00438446	4	adc	nm_052998
chr12	109226607	109227126	+	58	8	109226832	0.382219	2.13453	13.2113	13.0341	11.5173	0.403631	13.952	12.9218	13.0065	0.277831	12.8953	12.2559	12.6129	0.172922	12.823	0.0430374	0.0235562	-0.154934	0.121738	0.0110705	0.0204987	0.00810682	-0.0652575	-0.0238332	0.0805493	4	ssh1	nm_001161331
chr7	80928558	80929101	+	51	6	80928780	0.350367	1.68358	2.71411	3.08823	3.29694	0.142458	2.84306	2.8347	2.89514	0.185221	2.66551	3.08702	3.16138	0.345844	2.95401	-0.122196	0.0641036	0.158453	-0.0552311	-0.0594788	-0.0290403	-0.148264	0.0635407	0.0978814	-0.0813705	4	sema3c	nm_006379
chr9	127888003	127888832	+	66	6	127888282	0.191109	1.98421	1.99567	1.54411	2.24192	0.071229	1.68478	1.47257	1.64202	0.208373	1.90908	1.2901	1.36885	0.415012	1.68323	0.245638	-0.124456	0.4135	0.00132145	-0.192897	-0.0357619	0.181643	-0.383753	-0.298274	-0.254006	4	scai	nm_173690
chr9	82676909	82677301	+	42	7	82677159	0.286664	1.44306	4.43039	4.58692	3.29694	0.142458	4.47519	4.01276	4.79643	0.138915	3.63806	3.8703	3.68285	0.276675	4.08776	0.116122	0.166217	-0.310182	0.130637	-0.0267161	0.230651	-0.168141	-0.0788662	-0.150488	0.120805	4	tle4	nr_104239
chr15	50347248	50347877	+	47	7	50347450	0.382219	1.65351	5.069	5.81313	4.70364	0.142458	5.37022	4.82267	5.57423	0.254678	4.35847	4.74572	4.07395	0.449597	4.94789	0.0348871	0.232502	-0.0730375	0.118168	-0.0369814	0.171959	-0.182993	-0.060187	-0.280386	0.0195979	4	atp8b4	nr_073598
chr1	151964770	151965455	+	49	8	151964938	0.159258	1.47313	6.14666	7.17559	6.81368	0.284916	6.05466	5.37489	6.56809	0.300984	6.41163	6.35834	5.4102	0.138337	6.25708	-0.0256869	0.197607	0.122944	-0.0474435	-0.219256	0.0699831	0.0352009	0.023161	-0.209807	-0.16386	4	s100a10	nm_002966
chr17	38488050	38488826	+	52	6	38488450	0.222961	1.59338	5.6677	6.3127	6.41805	0.427374	5.37022	4.8963	4.75322	0.463052	4.53857	4.6075	4.59541	0.345844	5.23996	0.113207	0.2687	0.292578	0.0354251	-0.0978645	-0.140651	-0.207319	-0.185574	-0.189362	-0.292525	4	rara	nm_001024809
chr1	64127717	64128426	+	73	8	64128040	0.41407	2.34498	9.69895	11.0813	10.5942	0.427374	12.9517	13.8422	11.8398	0.277831	11.0222	12.302	11.1789	0.415012	11.6124	-0.259761	-0.067537	-0.132391	0.157481	0.253408	0.0279875	-0.0752448	0.0832324	-0.0548818	0.299522	4	pgm1	nm_001172818
chr8	49565588	49565976	+	37	6	49565770	0.222961	1.413	2.91368	2.13451	2.32984	0.593575	2.89571	3.01877	2.54945	0.185221	2.08918	2.2116	2.314	0.518765	2.49519	0.223689	-0.225247	-0.0989217	0.214764	0.27481	0.0310368	-0.256213	-0.174063	-0.108761	0.20703	4	loc101929217	nr_105004
chr7	26744273	26744910	+	79	3	26744613	0.318515	2.67568	1.27723	1.31704	1.71441	0.356145	1.68478	1.73027	1.12349	0.324136	1.44082	1.93515	1.5644	0.276675	1.53195	-0.262355	-0.218075	0.16234	0.137185	0.175627	-0.447386	-0.0884858	0.337073	0.0302346	0.0611717	4	c7orf71	nm_001145531
chr12	90127287	90127972	+	57	9	90127787	0.286664	1.7437	2.71411	3.08823	3.73653	0.189944	3.36955	2.3193	3.1112	0.324136	3.20581	3.1331	3.35693	0.242091	3.11497	-0.198741	-0.0124415	0.26248	0.113336	-0.42553	-0.00174958	0.0414708	0.0083693	0.107924	-0.121747	4	linc00936	nr_028138
chr1	157980467	157980876	+	39	5	157980698	0.191109	1.53326	7.98268	9.21926	6.76972	0.142458	6.10731	8.43047	6.65451	0.208373	6.30357	5.85152	6.81164	0.311259	7.12563	0.163855	0.371634	-0.0739217	-0.22248	0.242596	-0.0986858	-0.176849	-0.284207	-0.0650152	-0.180046	4	kirrel	nm_018240
chr6	1200509	1201451	+	77	7	1200942	0.445922	2.34498	7.30415	7.13017	6.15429	0.356145	5.79142	6.51613	6.52487	0.324136	6.0154	7.46414	6.06204	0.242091	6.5514	0.156913	0.122133	-0.090211	-0.177887	-0.00778832	-0.00585332	-0.123142	0.188173	-0.112001	-0.126788	4	loc285768	nr_027116
chr17	33581273	33581888	+	62	9	33581548	0.350367	1.98421	1.59654	2.72491	1.80233	0.403631	2.10597	1.98797	1.98771	0.393594	1.9451	2.16552	1.59699	0.380428	1.99034	-0.318068	0.453194	-0.143151	0.0814718	-0.00171546	-0.00190519	-0.0331677	0.121703	-0.317659	0.0286255	4	slfn5	nm_144975
chr1	221508686	221509176	+	75	12	221508751	0.605179	2.79594	2.9935	3.22447	2.85735	0.308659	3.6328	3.53417	3.84579	0.347289	2.37735	2.99487	3.97617	0.276675	3.27072	-0.127773	-0.0205451	-0.19493	0.151473	0.111764	0.233671	-0.460256	-0.127114	0.281773	0.280052	4	c1orf140	nr_024236
chr7	65746595	65747139	+	48	7	65746864	0.382219	1.56332	3.5922	4.35985	3.3409	0.332402	2.84306	3.71824	3.54331	0.324136	3.49398	3.63992	3.32434	0.207506	3.53953	0.0213101	0.300719	-0.0833224	-0.316116	0.0710617	0.00153802	-0.0186892	0.0403478	-0.0904906	-0.160741	4	tpst1	nm_003596
chr3	66038593	66039082	+	35	4	66038816	0.254812	1.17249	4.55013	5.63147	4.13217	0.308659	5.68612	5.30126	5.70386	0.138915	5.51112	4.74572	5.34502	0.380428	5.17854	-0.186639	0.120967	-0.325647	0.134898	0.0337892	0.139394	0.0897998	-0.125918	0.04565	0.233134	4	magi1	nm_004742
chr15	67175510	67176214	+	61	5	67175864	0.222961	1.95415	6.62562	6.44894	5.75866	0.189944	5.68612	6.55294	5.14212	0.347289	6.19551	6.03582	4.59541	0.276675	5.89346	0.168941	0.129948	-0.0333824	-0.0516711	0.153028	-0.196752	0.0721073	0.0344346	-0.35892	-0.1203	4	smad6	nm_001142861
chr4	10108106	10108593	+	32	4	10108396	0.191109	1.32281	6.90502	7.26642	6.54992	0.308659	6.05466	7.14197	6.56809	0.439899	6.05143	5.94367	5.70353	0.207506	6.46497	0.0950018	0.168601	0.0188352	-0.0945964	0.14368	0.0228302	-0.095368	-0.121289	-0.180788	-0.0701749	4	wdr1	nm_017491
chr21	39635277	39635906	+	46	3	39635572	0.350367	1.56332	11.2955	11.8533	10.0667	0.284916	8.84507	9.7926	10.2842	0.509357	9.11316	10.8276	8.66936	0.484181	10.0831	0.163813	0.23336	-0.0023482	-0.188988	-0.0421694	0.0285017	-0.145911	0.102782	-0.217936	-0.19916	4	kcnj15	nm_170736
chr2	46309501	46310257	+	55	6	46309967	0.318515	1.68358	3.75186	4.26902	3.47278	0.427374	3.15895	3.20284	3.41368	0.509357	3.31388	2.9488	3.0962	0.449597	3.40311	0.140751	0.32705	0.029236	-0.107407	-0.0875012	0.00447186	-0.038335	-0.206728	-0.136355	-0.229158	4	epas1	nm_001430
chr1	235246473	235247176	+	39	5	235246621	0.318515	1.32281	6.02692	7.08475	7.16535	0.427374	8.00268	8.02552	6.48166	0.463052	6.66377	7.14162	5.63834	0.311259	6.91451	-0.198207	0.0350901	0.0514099	0.210856	0.214966	-0.0932637	-0.0532889	0.0466231	-0.294356	0.148088	4	snora14b	nr_002956
chr9	74998975	74999277	+	20	3	74999089	0.0955546	0.751596	2.15532	2.04368	1.89025	0.379888	2.42186	1.95116	2.11734	0.416746	1.5849	2.5802	2.11845	0.242091	2.09591	0.0403294	-0.0364058	-0.149	0.208544	-0.103244	0.0146807	-0.403186	0.299907	0.0154367	0.0883522	4	zfand5	nm_001102420
chr6	112043151	112043884	+	85	13	112043513	0.350367	2.79594	2.71411	2.95198	3.1211	0.451117	3.6328	3.46054	2.76551	0.393594	1.80102	1.88907	2.15104	0.380428	2.7208	-0.00355063	0.117654	0.198027	0.417051	0.346969	0.0235155	-0.595216	-0.526351	-0.338992	0.158468	4	fyn	nm_153047
chr5	55860506	55861424	+	226	9	55860954	0.477773	6.85456	1.31714	1.54411	1.45065	0.569832	1.36888	1.21487	1.68523	0.347289	1.9451	1.56655	1.43403	0.55335	1.50295	-0.190389	0.0389791	-0.0510957	-0.134803	-0.306996	0.165148	0.372046	0.0597899	-0.0677243	-0.0247151	4	loc101928448	nm_001287053
chr1	150585768	150586395	+	53	6	150586110	0.318515	1.71364	5.82735	6.90309	6.6818	0.451117	5.63347	6.51613	6.74093	0.486204	5.40306	6.91124	6.1924	0.587934	6.31216	-0.115294	0.129108	0.0821023	-0.164111	0.0458804	0.0948129	-0.224359	0.13081	-0.0276357	-0.0397784	4	ensa	nm_207047
chr12	63097101	63097806	+	59	8	63097408	0.191109	2.1646	9.97835	11.2175	10.5942	0.213687	9.74011	9.71897	9.42002	0.300984	8.03255	8.38564	7.49607	0.311259	9.39816	0.0864231	0.255305	0.172821	0.0515602	0.0484262	0.00335219	-0.22652	-0.164456	-0.326244	-0.13707	4	mirlet7i	nr_029661
chr1	16125364	16126418	+	75	5	16125686	0.222961	2.22472	4.70978	5.90396	4.65968	0.142458	6.31791	5.70622	6.30882	0.324136	4.97081	5.29862	5.0191	0.172922	5.43277	-0.206028	0.119996	-0.221457	0.21776	0.070847	0.215683	-0.128205	-0.0360705	-0.114257	0.270593	4	uqcrhl	nm_001089591
chr8	49340975	49341527	+	44	5	49341249	0.127406	1.47313	7.42389	6.94851	6.41805	0.094972	8.16063	7.03153	6.87056	0.162068	6.33959	5.20647	6.15981	0.138337	6.72878	0.14183	0.0463582	-0.0682112	0.278335	0.0634931	0.0300831	-0.0859563	-0.37004	-0.127459	0.0839783	4	rp11-770e5,1	nr_105002
chr16	56640353	56641607	+	175	11	56641284	0.541476	5.08079	8.38181	8.94677	6.19825	0.332402	6.26526	6.33206	6.48166	0.393594	6.05143	6.08189	6.1924	0.415012	6.77017	0.30807	0.402175	-0.127331	-0.111818	-0.0965178	-0.062828	-0.161917	-0.154672	-0.128693	-0.284693	4	mt2a	nm_005953
chr1	61547939	61548379	+	29	3	61548188	0.159258	1.20255	0.718441	0.862887	0.835225	0.23743	1.05298	0.809914	0.648166	0.138915	0.396224	0.737199	0.782198	0.207506	0.76036	-0.0818131	0.182489	0.135483	0.46973	0.0910868	-0.230318	-0.940365	-0.044628	0.0408515	0.0314467	4	nfia	nm_005595
chr3	64276976	64277582	+	65	11	64277302	0.605179	2.52536	3.63212	2.95198	3.20902	0.284916	3.6328	3.31329	3.06799	0.532509	3.49398	3.686	2.80288	0.380428	3.31	0.133978	-0.16515	-0.0446992	0.134247	0.00142945	-0.109541	0.078037	0.155221	-0.239925	0.0340025	4	prickle2	nm_198859
chr10	5075466	5076102	+	49	5	5075788	0.254812	1.65351	5.069	5.31357	4.48384	0.332402	5.52817	6.07436	5.8335	0.347289	3.74612	3.77815	3.91099	0.172922	4.85974	0.0608211	0.1288	-0.116145	0.185922	0.321852	0.263481	-0.375483	-0.363202	-0.313346	0.232593	4	akr1c3	nm_001253908
chr3	64277716	64278051	+	36	6	64277800	0.445922	2.22472	2.71411	2.22534	2.50568	0.356145	3.4222	2.65063	2.89514	0.555662	2.23326	3.08702	2.7051	0.55335	2.71539	-0.000678657	-0.287132	-0.115958	0.333766	-0.0348233	0.0924767	-0.282004	0.185058	-0.00547504	0.265063	4	prickle2	nm_198859
chr15	60663344	60664023	+	57	9	60663772	0.254812	1.83389	6.8651	6.49436	6.11033	0.213687	7.63414	7.03153	7.12983	0.300984	6.59173	7.55629	7.13756	0.345844	6.9501	-0.0177519	-0.097846	-0.185782	0.135432	0.0168054	0.0368346	-0.0763758	0.120645	0.0383975	0.163484	4	anxa2	nm_001136015
chr10	3511102	3511709	+	44	6	3511354	0.318515	1.59338	7.18441	8.17472	6.24221	0.427374	8.42388	8.65136	7.778	0.277831	6.08745	7.60237	6.81164	0.484181	7.43956	-0.0503474	0.135952	-0.25316	0.179268	0.21771	0.0641817	-0.28938	0.0312318	-0.127214	0.209572	4	pitrm1	nm_001242309
chr3	5094620	5095417	+	57	7	5095138	0.350367	1.86396	5.46813	5.58606	5.36302	0.261173	6.9497	6.03754	6.35203	0.393594	6.51969	5.48292	5.89908	0.276675	5.96202	-0.124753	-0.0939709	-0.152754	0.221149	0.0181606	0.0914167	0.129002	-0.120857	-0.0153117	0.234068	4	arl8b	nm_018184
chr6	112005005	112005479	+	34	5	112005333	0.286664	1.23262	3.99134	3.76945	3.64862	0.379888	6.31791	4.8963	4.88285	0.300984	3.92622	3.54777	3.29175	0.380428	4.25247	-0.0914277	-0.173945	-0.220951	0.571147	0.203392	0.199424	-0.115159	-0.261387	-0.369445	0.486762	4	fyn	nm_153047
chr22	44529825	44530476	+	63	8	44530127	0.222961	2.04434	10.4573	9.58259	8.39621	0.284916	9.58216	9.82942	8.68543	0.347289	10.4459	10.8276	9.19083	0.276675	9.66638	0.113463	-0.0125615	-0.203238	-0.0126254	0.0241292	-0.154379	0.11189	0.163667	-0.0727816	-0.013513	4	parvg	nm_001137605
chr10	81158999	81159564	+	40	4	81159064	0.254812	1.44306	6.30632	6.35811	6.63784	0.308659	5.15963	6.40569	6.00634	0.463052	4.14234	5.02217	4.39986	0.242091	5.60426	0.170274	0.182076	0.244192	-0.119257	0.19283	0.0999638	-0.436075	-0.158212	-0.349064	-0.141001	4	zcchc24	nm_153367
chr2	42193427	42194056	+	46	5	42193756	0.41407	1.86396	4.19091	3.58779	3.16506	0.546089	3.94869	5.08037	4.79643	0.555662	3.63806	3.73207	4.13913	0.345844	4.03095	0.0561433	-0.168022	-0.348884	-0.0297436	0.333815	0.250843	-0.14795	-0.111142	0.0382095	0.338559	4	c2orf91	nm_001242815
chr19	39894111	39894797	+	44	7	39894327	0.191109	1.35287	2.79394	3.40613	2.76943	0.166201	3.3169	2.65063	2.59267	0.277831	2.77357	1.88907	2.86806	0.207506	2.78449	0.00488702	0.290722	-0.00782296	0.252424	-0.0710778	-0.102976	-0.00566845	-0.559734	0.0426627	-0.0698054	4	zfp36	nm_003407
chr2	62638387	62639251	+	76	4	62638759	0.509625	2.34498	4.39047	4.67775	4.79156	0.332402	4.58048	4.85949	4.2779	0.393594	4.82673	3.54777	4.30209	0.55335	4.47269	-0.0267678	0.0646723	0.09935	0.0343559	0.11966	-0.0642418	0.109903	-0.334231	-0.0561063	-0.0158269	4	tmem17	nm_198276
chr1	183248999	183249351	+	37	5	183249099	0.350367	1.56332	15.0473	16.1678	15.7814	0.688547	19.0064	19.9533	18.7968	0.439899	14.9845	15.7116	14.8618	0.380428	16.7012	-0.150443	-0.046831	-0.0817305	0.186531	0.256679	0.170537	-0.156483	-0.0881257	-0.168347	0.297584	4	nmnat2	nm_170706
chr14	75038351	75039207	+	73	10	75038964	0.477773	2.34498	7.94276	7.221	8.13246	0.261173	8.26593	8.61454	8.85827	0.162068	6.95193	8.43172	7.39829	0.380428	7.97966	-0.00668556	-0.144128	0.0273644	0.0508505	0.110448	0.150699	-0.198912	0.0794997	-0.109135	0.145149	4	ltbp2	nm_000428
chr7	43687291	43688169	+	77	6	43687636	0.318515	2.34498	10.577	12.4892	10.3304	0.189944	10.0034	10.3448	10.9756	0.347289	9.86959	12.1177	10.9834	0.276675	10.8546	-0.0373647	0.202374	-0.0714032	-0.117818	-0.0693937	0.0160004	-0.13724	0.158816	0.0170185	-0.0882723	4	stk17a	nm_004760
chr2	235889711	235890507	+	75	7	235890125	0.159258	2.28485	6.18657	6.72143	6.28617	0.189944	6.21261	6.47932	6.09276	0.185221	6.05143	7.04947	6.1924	0.207506	6.36357	-0.0406962	0.078932	-0.0176562	-0.0346377	0.0260042	-0.0627403	-0.0725622	0.147677	-0.039338	-0.0306511	4	sh3bp4	nm_014521
chr1	235106148	235107203	+	132	10	235106684	0.286664	3.96843	7.66337	8.22013	7.25327	0.403631	8.00268	7.4733	7.51873	0.231526	7.13204	6.54264	6.9746	0.103753	7.42009	0.0465432	0.147726	-0.032804	0.109048	0.0103098	0.0190532	-0.0571217	-0.181562	-0.0893253	-0.00768463	4	snora14b	nr_002956
chr8	6483713	6484175	+	37	5	6483876	0.318515	1.35287	2.83385	3.99653	3.47278	0.332402	3.94869	3.75506	3.75937	0.532509	2.05316	2.16552	1.59699	0.484181	3.06466	-0.112964	0.38302	0.180363	0.365648	0.293108	0.294762	-0.57788	-0.501012	-0.940374	0.167699	4	mir8055	nr_107022
chr10	29935205	29936351	+	146	14	29935481	0.382219	4.26907	4.03125	3.72404	3.95633	0.427374	4.79108	5.08037	4.01863	0.138915	3.13377	3.36347	3.25916	0.449597	3.92868	0.0371838	-0.0771764	0.0101185	0.286307	0.37089	0.0326602	-0.326143	-0.224093	-0.269544	0.23991	4	svil	nm_021738
chr8	118990324	118990888	+	50	6	118990588	0.382219	1.7437	3.43255	3.3153	2.72547	0.379888	2.79041	3.16603	2.29019	0.138915	2.70153	2.53412	3.06361	0.518765	2.89102	0.247701	0.19756	-0.0850745	-0.0511035	0.131094	-0.336114	-0.0978042	-0.190094	0.083652	-0.205437	4	ext1	nm_000127
chr12	96631331	96631954	+	75	10	96631614	0.286664	2.40511	3.2729	3.95111	4.04425	0.47486	3.89604	3.75506	3.84579	0.509357	3.16979	4.4232	4.33468	0.242091	3.85476	-0.236072	0.0356191	0.0692314	0.0153696	-0.0378051	-0.0033612	-0.282251	0.198449	0.169286	0.0351415	4	elk3	nm_005230
chr2	135159626	135160487	+	87	13	135160114	0.318515	2.70575	2.35489	1.95285	1.89025	0.403631	2.52716	1.76709	2.03092	0.208373	1.5849	1.61262	1.82513	0.242091	1.94953	0.27253	0.00245122	-0.0445549	0.37439	-0.141757	0.0590051	-0.29874	-0.27372	-0.0951308	0.0204037	4	mgat5	nm_002410
chr10	91087949	91088301	+	67	9	91088124	0.477773	2.61555	5.34839	5.4044	5.31907	0.213687	4.42254	4.6386	5.01249	0.162068	3.92622	5.66722	4.72578	0.449597	4.94052	0.114442	0.12947	0.106509	-0.15979	-0.0909739	0.0208629	-0.331522	0.197977	-0.064111	-0.193441	4	ifit3	nm_001549
chr12	57505692	57506331	+	67	7	57505988	0.477773	2.1646	5.46813	5.04108	6.06637	0.356145	4.42254	5.6694	4.79643	0.486204	3.8902	4.4232	3.94358	0.415012	4.85788	0.170721	0.0534044	0.320507	-0.135453	0.222869	-0.0183658	-0.320482	-0.135238	-0.30082	-0.158528	4	stat6	nm_003153
chr9	117612851	117613531	+	44	6	117613234	0.286664	1.50319	5.34839	6.44894	4.65968	0.332402	6.52851	7.17879	5.79029	0.254678	5.51112	6.63479	6.32277	0.276675	6.04703	-0.177121	0.092836	-0.375997	0.110526	0.247513	-0.0625921	-0.133882	0.133825	0.0643295	0.25191	4	tnfsf15	nm_005118
chr1	95155466	95155932	+	30	3	95155743	0.191109	1.02217	1.31714	1.4987	1.23086	0.332402	1.63213	1.58301	1.72844	0.300984	0.90051	0.875424	1.10811	0.415012	1.31937	-0.00243864	0.183861	-0.100185	0.306903	0.262825	0.389624	-0.551036	-0.591795	-0.251743	0.292705	4	linc01057	nr_104131
chr2	101741337	101741959	+	44	6	101741786	0.350367	1.50319	2.83385	3.36072	2.94527	0.569832	4.63313	3.38691	3.54331	0.347289	2.44939	3.08702	3.03102	0.449597	3.25229	-0.198693	0.0473128	-0.143058	0.510532	0.0585153	0.123641	-0.409036	-0.0752406	-0.101654	0.329042	4	tbc1d8	nm_001102426
chr11	9809366	9810131	+	62	8	9809853	0.350367	1.89402	6.58571	7.76598	7.34119	0.332402	8.47653	8.7618	8.38295	0.300984	8.17663	7.32592	7.43088	0.311259	7.80529	-0.245113	-0.00728353	-0.0884379	0.119021	0.166776	0.103007	0.0670542	-0.0914423	-0.0709182	0.243213	4	rp11-540a21,2	nr_033972
chr5	149897122	149897422	+	22	3	149897266	0.127406	0.841788	4.27073	5.63147	5.18719	0.356145	5.05433	4.41771	4.23469	0.347289	4.17836	4.56142	4.53023	0.415012	4.67402	-0.130179	0.26885	0.15029	0.112856	-0.0813621	-0.142407	-0.161724	-0.0351793	-0.0450778	-0.133291	4	ndst1	nm_001543
chr10	111834787	111835470	+	52	8	111835170	0.159258	1.59338	4.11108	5.58606	3.73653	0.142458	3.94869	3.97594	4.14826	0.231526	3.27786	3.27132	3.61767	0.242091	3.96371	0.0526647	0.494978	-0.0851518	-0.00547729	0.00444484	0.0656556	-0.2741	-0.276979	-0.131793	-0.132622	4	add3-as1	nr_038943
chr11	122078565	122079381	+	57	5	122078992	0.41407	1.77377	8.54146	8.44721	7.69286	0.261173	7.89739	6.99472	7.25946	0.231526	7.63632	6.12797	5.4102	0.103753	7.33418	0.219848	0.203839	0.0688856	0.10674	-0.0683698	-0.0147722	0.0582428	-0.259226	-0.438952	-0.156325	4	mir100hg	nr_024430
chr5	168587924	168588493	+	44	5	168588310	0.382219	1.62345	5.30848	4.58692	4.65968	0.213687	4.94903	5.6694	4.40753	0.324136	4.71867	5.02217	3.78062	0.207506	4.78917	0.148524	-0.0622477	-0.0395448	0.0473703	0.243421	-0.119804	-0.0213944	0.068536	-0.34115	0.0414187	4	mir585	nr_030311
chr9	137494299	137494701	+	42	6	137494498	0.254812	1.59338	4.4703	4.17819	3.51674	0.23743	5.52817	4.19683	3.41368	0.115763	4.0703	4.56142	3.35693	0.103753	4.14362	0.109481	0.0119868	-0.236653	0.415911	0.0184088	-0.279565	-0.0257544	0.138592	-0.303747	0.0899804	4	col5a1	nm_000093
chr11	48084914	48085587	+	44	7	48085236	0.0955546	1.38294	3.11324	3.67862	3.25298	0.379888	3.6328	3.49736	3.45689	0.439899	3.92622	3.45562	3.81322	0.242091	3.53633	-0.183833	0.0569137	-0.120489	0.0388288	-0.0159867	-0.0327784	0.15089	-0.0333068	0.108756	0.0791574	4	ptprj	nm_002843
chr13	51103091	51103939	+	105	11	51103420	0.541476	3.1567	8.22216	8.81053	8.13246	0.356145	8.16063	6.58976	7.25946	0.185221	5.94336	6.95732	6.48573	0.484181	7.39571	0.152828	0.25254	0.137002	0.141992	-0.166463	-0.026826	-0.315409	-0.0881576	-0.189421	-0.197889	4	dleu7-as1	nr_046551
chr7	115957198	115957732	+	40	4	115957483	0.191109	1.35287	5.069	5.17732	4.70364	0.23743	5.05433	4.1232	4.6668	0.208373	4.17836	5.34469	4.33468	0.345844	4.73911	0.0970839	0.127588	-0.0108407	0.0929016	-0.200853	-0.0221843	-0.181679	0.17349	-0.128691	-0.114656	4	tes	nm_152829
chr5	158128417	158129657	+	115	14	158129340	0.222961	3.2469	12.5328	13.5791	11.4294	0.213687	14.2679	15.9774	13.7411	0.324136	13.5437	13.3157	11.3419	0.449597	13.3032	-0.0860664	0.0296137	-0.219026	0.101002	0.264257	0.0467248	0.0258427	0.00134857	-0.230117	0.229154	4	loc101927697	nr_109888
chr11	8754169	8754743	+	45	5	8754478	0.286664	1.62345	1.35706	2.13451	1.97816	0.47486	2.52716	2.577	2.46303	0.300984	2.48541	2.3959	2.08586	0.380428	2.22268	-0.711819	-0.0583936	-0.168136	0.185221	0.213395	0.148137	0.161184	0.108268	-0.0916547	0.495034	3	snora45	nr_002977
chr1	8176923	8177626	+	62	6	8177144	0.286664	1.98421	7.66337	5.90396	6.33013	0.23743	7.79209	7.76782	8.85827	0.300984	7.99653	9.21499	6.81164	0.311259	7.5932	0.0132711	-0.363024	-0.262473	0.0373018	0.032801	0.222318	0.0746654	0.279275	-0.156705	0.301549	3	errfi1	nm_018948
chr9	79269447	79270217	+	79	10	79269811	0.222961	2.46524	4.98917	5.44981	4.39592	0.213687	8.42388	7.58374	8.68543	0.231526	8.06857	8.20134	7.98494	0.103753	7.08698	-0.50637	-0.378964	-0.689005	0.249314	0.0977396	0.293427	0.187142	0.210689	0.172111	0.738273	3	pca3	nr_015342
chr2	19340370	19341172	+	60	8	19340710	0.191109	1.86396	5.46813	5.76772	5.23115	0.308659	7.58149	8.2464	8.81506	0.463052	6.95193	7.78667	7.39829	0.380428	7.02743	-0.361948	-0.284996	-0.425869	0.109485	0.230768	0.326974	-0.0155821	0.148009	0.0741954	0.580014	3	mir4757	nr_039914
chr6	154708550	154708874	+	25	4	154708701	0.191109	0.931979	2.03558	1.63494	1.49461	0.379888	1.73742	1.69346	1.85808	0.370441	1.5849	2.0273	2.34659	0.276675	1.82365	0.15861	-0.157591	-0.28706	-0.0698817	-0.106861	0.026978	-0.202443	0.152726	0.363736	0.0454258	3	ipcef1	nm_015553
chr1	27049932	27050485	+	61	7	27050233	0.286664	2.01428	0.718441	1.08996	0.615429	0.403631	0.789739	1.06761	0.691377	0.416746	1.04459	1.33617	1.14071	0.484181	0.943781	-0.393583	0.207753	-0.61686	-0.257078	0.177866	-0.448979	0.146414	0.501583	0.273402	0.0914996	3	arid1a	nm_139135
chr2	85969067	85970068	+	73	9	85969830	0.350367	2.19466	5.34839	5.94938	5.31907	0.284916	8.73977	7.9887	7.60515	0.231526	7.02398	7.32592	7.17015	0.172922	6.94117	-0.376073	-0.22244	-0.384005	0.332418	0.202783	0.131799	0.0171095	0.0778312	0.0468249	0.549839	3	atoh8	nm_032827
chr3	111521818	111522561	+	50	6	111522248	0.350367	1.62345	5.6677	7.17559	6.06637	0.189944	6.58115	6.81064	8.29653	0.162068	7.13204	9.21499	6.55091	0.103753	7.0551	-0.315903	0.0244294	-0.217833	-0.100326	-0.0508759	0.233841	0.0156471	0.385316	-0.106972	0.197315	3	phldb2	nm_001134438
chr15	39156883	39157689	+	73	9	39157262	0.41407	2.28485	8.6612	8.53804	7.42911	0.166201	11.8987	11.7806	11.7102	0.463052	10.7701	12.9471	9.77748	0.380428	10.3903	-0.262594	-0.283258	-0.483973	0.195573	0.181176	0.172532	0.051797	0.317391	-0.0877	0.526369	3	c15orf53	nm_207444
chr10	59463425	59463909	+	53	9	59463695	0.382219	1.7437	0.957921	0.908302	1.01106	0.142458	1.42153	1.87753	1.64202	0.347289	1.29673	1.70477	1.69476	0.138337	1.39051	-0.53764	-0.614375	-0.459748	0.0318246	0.433216	0.239854	-0.100737	0.293961	0.285464	0.772219	3	mir3924	nr_037490
chr9	84108021	84108420	+	42	7	84108161	0.350367	1.56332	0.11974	0.227075	0.219796	0.166201	0.473843	0.0368143	0.475322	0.439899	0.216122	0.414675	0.293324	0.138337	0.27519	-1.20052	-0.277258	-0.324264	0.78398	-2.90209	0.788476	-0.348581	0.59155	0.0920672	0.157469	3	tle1	nm_005077
chr8	121396402	121396936	+	87	11	121396654	0.668883	2.73581	0.878095	0.772057	0.879184	0.356145	1.05298	0.993986	0.993855	0.324136	1.83704	1.38225	1.59699	0.276675	1.15405	-0.394256	-0.579925	-0.392466	-0.13222	-0.215407	-0.215597	0.670679	0.260313	0.468649	0.267808	3	mtbp	nm_022045
chr9	27154848	27155353	+	38	6	27155136	0.318515	1.29275	3.5922	3.49696	3.03319	0.332402	3.2116	3.8655	4.36432	0.300984	5.25898	4.65357	5.4102	0.311259	4.0985	-0.190228	-0.228995	-0.434263	-0.351803	-0.0844419	0.0906599	0.359685	0.183241	0.400586	0.1693	3	tek	nm_000459
chr16	57925897	57926496	+	40	4	57926098	0.254812	1.35287	1.63645	1.77119	1.45065	0.308659	3.00101	2.65063	2.16055	0.254678	3.16979	3.59385	2.90065	0.138337	2.48164	-0.600726	-0.486577	-0.774591	0.274152	0.09504	-0.199893	0.353094	0.534234	0.225082	0.677064	3	cngb1	nm_001297
chr4	188400071	188400551	+	67	11	188400273	0.445922	2.25479	4.03125	3.99653	3.91237	0.189944	6.58115	6.88427	6.04955	0.277831	7.2401	9.49144	7.65902	0.207506	6.20508	-0.622221	-0.634702	-0.665406	0.0848916	0.149855	-0.0366206	0.22256	0.613178	0.303711	0.706818	3	rp11-138b4,1	nr_038931
chr5	172885741	172886290	+	44	7	172886066	0.191109	1.38294	3.67203	3.9057	3.47278	0.593575	7.26559	6.00073	6.43845	0.254678	5.11489	5.48292	5.57316	0.518765	5.21403	-0.50582	-0.416818	-0.586308	0.478682	0.202739	0.304315	-0.027694	0.0725457	0.0960974	0.831561	3	mir8056	nr_107023
chr1	87253870	87254885	+	83	12	87254310	0.605179	2.4953	2.03558	0.953717	1.09898	0.189944	1.42153	1.73027	1.51239	0.254678	1.65694	1.88907	2.47696	0.415012	1.64172	0.310238	-0.783571	-0.579039	-0.20776	0.0757943	-0.118376	0.0133151	0.202474	0.593367	0.267343	3	sh3glb1	nm_001206651
chr2	161232432	161233063	+	44	6	161232823	0.286664	1.38294	3.39264	3.45155	3.1211	0.071229	5.15963	6.11117	5.18533	0.300984	4.64663	5.98974	5.54057	0.415012	4.73315	-0.480394	-0.455558	-0.600744	0.124465	0.368648	0.131635	-0.0266163	0.339693	0.227233	0.720481	3	mir4785	nr_039946
chr17	4107886	4108351	+	38	5	4108080	0.286664	1.44306	3.71194	2.58866	2.54963	0.284916	3.47485	3.64461	4.58038	0.231526	3.56602	2.99487	3.71544	0.103753	3.42516	0.116005	-0.403964	-0.425879	0.0207804	0.0895963	0.419296	0.0581441	-0.193676	0.117363	0.414504	3	ankfy1	nm_001257999
chr5	10551460	10551872	+	37	5	10551690	0.222961	1.17249	2.19524	2.36158	2.24192	0.332402	3.94869	4.27046	4.14826	0.509357	2.91765	3.40955	4.10654	0.415012	3.28888	-0.583219	-0.47784	-0.55286	0.26378	0.376796	0.334913	-0.172788	0.0519848	0.320328	0.863136	3	ankrd33b	nm_001164440
chr16	70784960	70785376	+	36	5	70785146	0.286664	1.20255	4.59004	4.76859	4.04425	0.617318	5.73877	5.89029	5.48781	0.671425	5.11489	4.93002	5.31243	0.449597	5.09745	-0.15127	-0.0962154	-0.333905	0.170964	0.208561	0.106454	0.00492799	-0.0481831	0.0595951	0.35579	3	vac14-as1	nr_034083
chr4	86953503	86954877	+	112	13	86954492	0.477773	3.06651	6.58571	6.17645	6.15429	0.189944	6.68645	7.10516	8.42616	0.439899	6.62775	7.37199	6.87683	0.345844	6.89009	-0.0651838	-0.157744	-0.16293	-0.0432814	0.0443442	0.290353	-0.056003	0.0975322	-0.00277979	0.225758	3	mapk10	nm_138981
chr10	75807513	75807999	+	43	5	75807838	0.254812	1.71364	3.43255	2.90657	2.85735	0.379888	4.63313	4.04957	5.22854	0.324136	4.64663	5.29862	4.43246	0.242091	4.16505	-0.279051	-0.519017	-0.543655	0.153655	-0.0405632	0.328076	0.157852	0.347284	0.0897737	0.594297	3	vcl	nm_003373
chr4	169555412	169556022	+	61	10	169555672	0.382219	1.95415	5.50805	5.31357	5.23115	0.356145	7.10765	6.1848	7.0002	0.347289	8.24867	8.66209	8.40863	0.207506	6.85164	-0.314909	-0.36677	-0.389323	0.0529218	-0.147723	0.0309453	0.267711	0.338265	0.295421	0.335715	3	palld	nm_001166109
chr9	12923368	12924201	+	75	13	12923682	0.477773	2.31492	5.42822	5.90396	5.27511	0.284916	9.89806	7.84144	8.64222	0.347289	6.84387	7.97097	6.1924	0.242091	7.11069	-0.389511	-0.268307	-0.43079	0.477155	0.141129	0.281411	-0.0551774	0.164764	-0.199491	0.662768	3	lurap1l	nm_203403
chr4	129492831	129493334	+	44	6	129493078	0.191109	1.53326	3.51238	3.3153	2.50568	0.332402	5.00168	5.22763	5.09891	0.393594	6.55571	5.34469	5.57316	0.484181	4.68168	-0.414579	-0.497887	-0.901827	0.095385	0.15913	0.123162	0.485725	0.191081	0.251469	0.730656	3	jade1	nm_024900
chr7	36155176	36155806	+	49	5	36155442	0.318515	1.62345	5.38831	4.85942	5.09927	0.308659	5.89671	5.85347	6.17919	0.347289	7.20408	8.06312	6.71387	0.276675	6.13971	-0.188339	-0.337389	-0.267881	-0.0582602	-0.0688788	0.00924538	0.230642	0.393166	0.128973	0.225238	3	loc101928618	nr_108089
chr3	157000227	157000926	+	95	11	157000528	0.41407	3.00638	3.91151	4.67775	4.7476	0.284916	6.6338	7.06834	5.8335	0.208373	5.58316	6.26619	5.24725	0.276675	5.55212	-0.505313	-0.247223	-0.225842	0.256797	0.348333	0.0713216	0.00804237	0.17455	-0.0814791	0.55161	3	ccnl1	nm_020307
chr15	71587646	71588251	+	53	8	71587884	0.41407	1.92409	6.98484	8.08389	6.59388	0.308659	8.63447	8.46729	8.46937	0.208373	9.25724	9.44537	8.21308	0.311259	8.23883	-0.238211	-0.0273896	-0.32131	0.0676696	0.039461	0.0398166	0.168143	0.197168	-0.00451533	0.244619	3	thsd4	nm_024817
chr8	49502473	49503155	+	65	7	49502770	0.41407	2.34498	3.79177	3.81487	3.3409	0.213687	6.37056	6.62657	6.43845	0.300984	4.28643	4.93002	4.6606	0.172922	4.9178	-0.37514	-0.366379	-0.557775	0.373408	0.430251	0.388702	-0.198237	0.00358157	-0.0774971	0.830551	3	loc101929217	nr_105004
chr1	8121184	8121800	+	50	5	8121502	0.286664	1.59338	7.02476	7.85681	8.04454	0.332402	9.47686	11.1179	10.1546	0.416746	9.47336	10.0443	8.99528	0.449597	9.13205	-0.378491	-0.216995	-0.18293	0.0534704	0.283875	0.153123	0.0529374	0.137372	-0.0217711	0.422962	3	errfi1	nm_018948
chr8	128352176	128352738	+	43	3	128352515	0.286664	1.38294	1.35706	1.45328	1.93421	0.189944	2.31657	1.84071	2.63588	0.138915	1.72898	1.52047	2.7051	0.138337	1.94358	-0.51824	-0.419404	-0.00697819	0.253269	-0.0784535	0.439563	-0.168799	-0.354199	0.476964	0.519667	3	ccat2	nr_109834
chr16	88340421	88341298	+	113	7	88341010	0.286664	3.45734	5.38831	5.90396	5.09927	0.427374	6.9497	5.6694	5.61744	0.347289	7.20408	7.74059	7.39829	0.415012	6.33012	-0.2324	-0.100548	-0.311941	0.134719	-0.159036	-0.172319	0.186582	0.290212	0.22496	0.149418	3	loc101928880	nr_110944
chr10	29947938	29948401	+	63	10	29948002	0.350367	2.28485	4.62995	4.54151	4.57176	0.332402	4.68578	6.1848	6.30882	0.439899	4.89877	4.83787	5.31243	0.380428	5.10797	-0.141751	-0.169577	-0.16	-0.124459	0.275978	0.304621	-0.0603286	-0.0783769	0.0566227	0.309156	3	svil	nm_021738
chr1	8137106	8137791	+	102	8	8137481	0.254812	3.2469	3.43255	4.04194	3.82445	0.213687	6.42321	6.29524	6.39524	0.370441	7.67234	7.41807	7.46347	0.311259	5.88517	-0.777803	-0.542035	-0.621831	0.12621	0.0971783	0.119915	0.382583	0.33396	0.342763	0.761657	3	errfi1	nm_018948
chr13	106803620	106804028	+	65	8	106803808	0.477773	2.10447	6.34623	8.1293	6.94556	0.213687	8.89772	10.1607	9.3336	0.277831	9.40132	10.5512	10.1034	0.276675	8.87434	-0.48374	-0.126508	-0.353549	0.0037966	0.195295	0.0727938	0.0832243	0.249691	0.187129	0.411894	3	linc00460	nr_034119
chr11	117091602	117092168	+	47	7	117091908	0.159258	1.86396	12.2534	11.8988	10.3304	0.593575	19.4276	17.5972	17.4573	0.463052	12.9673	14.9744	13.2322	0.449597	14.4598	-0.238868	-0.281241	-0.485153	0.426054	0.283297	0.271777	-0.157169	0.0504429	-0.128	0.66213	3	pcsk7	nm_004716
chr10	114344823	114345251	+	42	6	114345007	0.286664	1.50319	4.07117	4.45068	4.308	0.284916	6.00201	4.96993	6.26561	0.208373	5.33102	6.49657	5.0517	0.311259	5.2163	-0.357584	-0.229001	-0.276007	0.20242	-0.069801	0.264428	0.0313846	0.316652	-0.0462583	0.41988	3	mir4295	nr_036177
chr15	59631350	59631968	+	46	4	59631748	0.0955546	1.38294	3.79177	4.35985	3.73653	0.261173	4.05399	5.26444	4.32111	0.439899	5.36704	5.34469	5.60575	0.415012	4.64946	-0.294193	-0.0927865	-0.315364	-0.197722	0.179216	-0.105663	0.207061	0.201043	0.269844	0.192725	3	myo1e	nm_004998
chr10	63752314	63753044	+	102	7	63752664	0.637031	3.33709	3.15316	4.31443	4.00029	0.332402	6.10731	6.1848	5.61744	0.277831	5.04285	5.75937	6.1924	0.242091	5.15245	-0.708462	-0.256088	-0.365155	0.245278	0.263468	0.124654	-0.0310184	0.160652	0.26524	0.654368	3	mir548av	nr_049858
chr15	60694488	60695088	+	49	7	60694805	0.286664	1.59338	5.18874	4.45068	6.02241	0.403631	4.84373	5.52214	5.40139	0.208373	6.69979	5.43684	6.12722	0.311259	5.52144	-0.0896599	-0.311019	0.125297	-0.188926	0.000184171	-0.0317144	0.279072	-0.0222746	0.150188	0.0183083	3	anxa2	nm_001136015
chr1	16212085	16212528	+	26	2	16212339	0.191109	1.02217	3.43255	3.76945	3.20902	0.546089	6.21261	5.04356	5.70386	0.347289	4.39449	4.46927	3.42212	0.345844	4.40633	-0.360295	-0.225221	-0.457442	0.495623	0.194866	0.372363	-0.00388139	0.0204632	-0.364687	0.701937	3	flj37453	nr_024279
chr4	102739531	102739926	+	38	5	102739676	0.222961	1.26268	0.319307	0.317906	0.263755	0.213687	0.737089	0.589029	0.302478	0.347289	0.396224	0.645049	0.651832	0.587934	0.469185	-0.555214	-0.56156	-0.830958	0.651681	0.32818	-0.63333	-0.243841	0.459251	0.474341	0.764754	3	bank1	nm_001083907
chr1	8064950	8065673	+	109	14	8065290	0.382219	3.33709	5.54796	5.13191	4.35196	0.356145	5.68612	6.99472	6.04955	0.185221	5.33102	6.03582	5.31243	0.242091	5.60461	-0.0146561	-0.127119	-0.364947	0.0208302	0.319652	0.110215	-0.0722028	0.106936	-0.077242	0.31914	3	errfi1	nm_018948
chr10	31323287	31323938	+	42	3	31323656	0.318515	1.29275	4.94926	5.90396	5.05531	0.308659	7.055	6.14799	7.25946	0.231526	7.27612	7.04947	7.46347	0.242091	6.46223	-0.384819	-0.130348	-0.354232	0.126614	-0.0719174	0.167832	0.171138	0.125483	0.207816	0.363976	3	znf438	nm_001143767
chr11	6353164	6353795	+	88	8	6353506	0.41407	2.73581	0.997835	1.36245	1.49461	0.189944	1.15828	1.69346	1.64202	0.208373	1.4048	1.24402	1.66217	0.242091	1.40663	-0.495368	-0.0460346	0.0875315	-0.280253	0.267731	0.223232	-0.00188124	-0.177227	0.240828	0.221527	3	prkcdbp	nm_145040
chr3	32010076	32010951	+	66	5	32010665	0.286664	1.98421	5.82735	6.04021	5.27511	0.213687	6.42321	5.89029	6.82735	0.254678	6.80785	7.60237	6.9746	0.276675	6.40759	-0.136941	-0.0851843	-0.280582	0.00351126	-0.121445	0.0915438	0.0874175	0.246666	0.122328	0.158773	3	znf860	nm_001137674
chr2	43766884	43767829	+	89	11	43767302	0.350367	2.67568	3.11324	2.22534	2.32984	0.189944	4.63313	4.1232	4.83964	0.208373	3.74612	3.59385	3.74803	0.207506	3.59471	-0.207457	-0.69185	-0.625646	0.366112	0.197889	0.429025	0.0595215	-0.000346951	0.0602578	0.839326	3	thada	nm_001083953
chr5	172199371	172199950	+	40	6	172199668	0.222961	1.29275	8.6612	9.76425	9.01164	0.47486	12.7938	12.1487	11.4077	0.463052	9.14918	11.4266	9.64711	0.380428	10.4456	-0.270252	-0.0973114	-0.21303	0.292549	0.217912	0.12712	-0.191178	0.129503	-0.114723	0.406058	3	dusp1	nm_004417
chr5	106724112	106725260	+	144	20	106725006	0.477773	4.239	1.7961	0.953717	1.45065	0.166201	2.84306	1.58301	1.59881	0.347289	2.16122	2.44197	2.7051	0.345844	1.94818	-0.11726	-1.0305	-0.425426	0.545314	-0.299455	-0.285131	0.149718	0.325917	0.473553	0.511304	3	efna5	nm_001962
chr13	40171983	40172401	+	33	5	40172199	0.222961	1.05223	1.1974	1.27162	0.923144	0.261173	1.21093	2.0616	1.85808	0.231526	1.33275	1.38225	1.79254	0.657103	1.44781	-0.273968	-0.187205	-0.649248	-0.257757	0.509889	0.359935	-0.119465	-0.0668582	0.308128	0.574163	3	lhfp	nm_005780
chr17	48716376	48717152	+	53	4	48716920	0.254812	1.71364	3.67203	4.04194	3.91237	0.356145	4.26459	5.19081	4.53716	0.439899	4.68265	5.06825	4.07395	0.311259	4.38264	-0.255222	-0.116751	-0.163757	-0.0393937	0.244161	0.049991	0.0955252	0.209686	-0.105372	0.263496	3	abcc3	nm_001144070
chr9	78166736	78167173	+	33	4	78166906	0.254812	1.26268	2.47463	2.67949	2.46172	0.189944	3.1063	3.31329	4.49395	0.138915	3.49398	3.40955	4.30209	0.311259	3.30389	-0.416952	-0.302206	-0.4245	-0.0889655	0.00409785	0.44382	0.0807054	0.045415	0.380873	0.50087	3	mir548h3	nr_031679
chr3	32511160	32511645	+	38	6	32511448	0.286664	1.53326	1.59654	2.17992	1.84629	0.522346	2.94836	3.05559	2.85193	0.509357	2.59347	2.99487	2.314	0.311259	2.48677	-0.639331	-0.189997	-0.429648	0.245636	0.297174	0.197664	0.0606071	0.268219	-0.103885	0.666483	3	cmtm6	nm_017801
chr6	36337309	36337742	+	43	7	36337512	0.254812	1.50319	3.19307	2.72491	2.154	0.617318	4.68578	3.93913	4.53716	0.416746	5.04285	4.83787	4.04136	0.518765	3.90624	-0.290835	-0.519573	-0.85876	0.26251	0.0120971	0.216011	0.368461	0.308592	0.0490602	0.719929	3	etv7	nm_001207038
chr13	114559520	114560183	+	76	5	114559892	0.318515	2.52536	2.23515	2.49783	2.68151	0.522346	3.1063	2.3193	2.76551	0.439899	2.95367	3.22525	2.96583	0.380428	2.75004	-0.299081	-0.138777	-0.0364057	0.175747	-0.245763	0.00809288	0.103057	0.229957	0.108986	0.137447	3	gas6	nm_000820
chr14	61029826	61030304	+	32	3	61030090	0.191109	1.20255	3.19307	3.08823	2.90131	0.451117	4.00134	4.45453	3.75937	0.162068	3.96224	4.65357	5.0191	0.207506	3.89253	-0.285763	-0.333929	-0.424004	0.0397762	0.194565	-0.0502187	0.0256095	0.25763	0.366722	0.409273	3	six6	nm_007374
chr1	154391944	154392492	+	37	4	154392210	0.222961	1.56332	3.55229	3.49696	3.3409	0.47486	6.6338	6.29524	6.78414	0.532509	4.25041	5.11432	4.13913	0.55335	4.84524	-0.44782	-0.470467	-0.536332	0.453267	0.377693	0.485597	-0.188969	0.0779729	-0.227241	0.923725	3	il6r	nm_001206866
chr12	109882851	109883533	+	70	9	109883192	0.41407	2.28485	3.91151	5.13191	4.96739	0.427374	7.10765	6.36887	7.21625	0.208373	6.0154	7.27984	6.84423	0.518765	6.09367	-0.639586	-0.247818	-0.294824	0.22206	0.0637257	0.243938	-0.0186504	0.256595	0.167577	0.57065	3	kctd10	nm_031954
chr2	205707295	205707825	+	45	4	205707530	0.159258	1.56332	4.15099	3.72404	3.03319	0.308659	4.36989	3.97594	4.96928	0.208373	4.46653	5.43684	4.95392	0.0691687	4.34229	-0.0650001	-0.221589	-0.517622	0.00913952	-0.127159	0.194579	0.0406975	0.324313	0.190115	0.29359	3	pard3b	nm_057177
chr16	53124413	53125522	+	104	10	53125202	0.382219	3.12664	3.55229	4.08736	3.64862	0.284916	5.00168	5.08037	4.06184	0.231526	4.79071	5.57507	5.21465	0.242091	4.55695	-0.35932	-0.156901	-0.320721	0.134342	0.156864	-0.165936	0.0721699	0.29092	0.194502	0.320738	3	chd9	nm_025134
chr10	78141651	78142701	+	76	12	78142226	0.477773	2.22472	4.98917	5.94938	4.92343	0.261173	7.1603	6.14799	6.74093	0.300984	5.97938	7.37199	7.26792	0.103753	6.28117	-0.332232	-0.0782938	-0.351368	0.188987	-0.0309185	0.101915	-0.0710356	0.231022	0.210511	0.340626	3	c10orf11	nm_032024
chr3	29457888	29458438	+	48	7	29458164	0.286664	1.71364	1.35706	1.27162	1.71441	0.23743	2.52716	2.24567	2.24698	0.162068	1.87306	1.88907	1.9555	0.311259	1.89784	-0.483876	-0.577685	-0.146644	0.413163	0.242791	0.24363	-0.0189584	-0.00667709	0.0431785	0.702596	3	rbms3	nm_014483
chr6	130030427	130031576	+	118	9	130030742	0.732586	3.39721	3.75186	3.58779	3.47278	0.498603	4.31724	4.49134	4.79643	0.370441	5.11489	6.12797	4.39986	0.415012	4.45113	-0.246566	-0.311075	-0.358081	-0.0440632	0.0129754	0.10779	0.200533	0.461237	-0.0167125	0.330808	3	arhgap18	nm_033515
chrx	45569649	45570032	+	21	0	45569878	0.159258	0.721532	4.55013	5.44981	3.64862	0.023743	5.84407	6.29524	6.00634	0.0463052	5.58316	6.49657	5.60575	0.172922	5.49774	-0.272933	-0.0126331	-0.59149	0.0881328	0.195423	0.127647	0.0222425	0.240838	0.0280689	0.42942	3	loc392452	nr_102268
chr1	228416164	228416845	+	47	4	228416534	0.127406	1.50319	0.518874	0.681226	0.703348	0.569832	0.947686	0.846729	0.734589	0.416746	0.864489	0.921499	0.749607	0.311259	0.774227	-0.577373	-0.184623	-0.13852	0.291652	0.129142	-0.0758209	0.159091	0.251225	-0.0466238	0.415163	3	c1orf145	nr_073154
chr9	122713250	122714051	+	73	10	122713583	0.350367	2.31492	6.34623	7.35725	5.53886	0.166201	10.5298	9.82942	10.1546	0.254678	7.34816	8.84639	8.44122	0.380428	8.26578	-0.381251	-0.167984	-0.577561	0.349262	0.249956	0.296912	-0.169767	0.0979389	0.0303017	0.674309	3	mir147a	nr_029604
chr3	124597404	124598360	+	112	12	124597952	0.605179	3.42728	5.14883	4.72317	4.70364	0.356145	5.37022	4.93311	5.40139	0.347289	5.4751	5.75937	5.8013	0.103753	5.25735	-0.0300914	-0.15458	-0.160559	0.0306466	-0.0918362	0.0389947	0.0585499	0.131576	0.142042	0.107678	3	itgb5	nm_002213
chr7	112124796	112125227	+	32	5	112124994	0.254812	1.32281	1.95576	2.72491	2.154	0.427374	3.84339	2.79789	3.67294	0.393594	3.24183	3.45562	2.63992	0.172922	2.94292	-0.589521	-0.111041	-0.450228	0.385134	-0.0729101	0.319689	0.139563	0.231698	-0.156754	0.594234	3	lsmem1	nm_182597
chr4	121364132	121364801	+	51	8	121364402	0.222961	1.59338	2.55446	2.81574	2.28588	0.118715	3.15895	3.49736	4.79643	0.300984	3.49398	2.99487	2.99843	0.207506	3.17734	-0.314805	-0.174309	-0.475072	-0.00837406	0.138444	0.59414	0.137049	-0.0853267	-0.0836156	0.562799	3	mad2l1	nm_002358
chr10	74003407	74004151	+	65	5	74003784	0.445922	2.01428	5.70761	6.49436	5.7147	0.403631	8.73977	9.05632	8.77185	0.324136	6.30357	6.86517	7.13756	0.449597	7.19899	-0.334907	-0.148607	-0.333117	0.279801	0.33113	0.285087	-0.191626	-0.0684993	-0.0123638	0.570883	3	ascc1	nr_045564
chr9	98556435	98556989	+	41	5	98556729	0.382219	1.53326	0.838181	0.953717	1.09898	0.213687	1.36888	1.14124	1.59881	0.463052	0.792449	1.05972	1.30366	0.345844	1.12841	-0.428952	-0.242652	-0.0381196	0.278711	0.0163206	0.502713	-0.509896	-0.0905969	0.208286	0.502489	3	ercc6l2	nm_001010895
chr3	188311865	188312346	+	31	3	188312119	0.254812	1.02217	4.62995	4.72317	3.86841	0.189944	6.10731	6.40569	7.60515	0.324136	6.80785	8.61602	7.98494	0.311259	6.30539	-0.445588	-0.41683	-0.704844	-0.0460478	0.022768	0.270392	0.110615	0.450436	0.340696	0.604791	3	lpp-as1	nr_046623
chr7	121184717	121185204	+	40	6	121184850	0.222961	1.26268	3.15316	2.72491	3.16506	0.332402	5.10698	4.56497	4.23469	0.324136	4.50255	4.2389	4.2695	0.380428	3.99563	-0.341627	-0.552218	-0.33619	0.354045	0.192182	0.083831	0.172317	0.0852641	0.0956421	0.620031	3	fam3c	nm_014888
chr11	128080220	128080851	+	48	6	128080590	0.222961	1.56332	4.82952	3.63321	4.00029	0.094972	4.42254	4.71223	4.58038	0.185221	4.82673	5.89759	4.88874	0.103753	4.64347	0.0566767	-0.353959	-0.215099	-0.0703292	0.0212067	-0.0197371	0.0558437	0.344924	0.0742592	0.147841	3	ets1	nm_005238
chr10	19927395	19927876	+	46	6	19927584	0.41407	1.83389	4.15099	4.13277	3.51674	0.166201	3.6328	4.45453	4.62359	0.185221	4.21439	5.11432	4.72578	0.138337	4.2851	-0.0458728	-0.0522186	-0.285091	-0.238248	0.055944	0.109684	-0.0240068	0.255213	0.141224	0.103521	3	plxdc2	nm_032812
chr2	43986335	43986901	+	45	6	43986727	0.159258	1.56332	3.47246	3.67862	2.59359	0.23743	3.47485	4.34409	3.80258	0.324136	3.63806	3.82422	3.61767	0.380428	3.60513	-0.05409	0.0291158	-0.475097	-0.0530994	0.269003	0.0769272	0.013119	0.085116	0.00500944	0.264301	3	dync2li1	nm_001193464
chr18	11954199	11954792	+	36	4	11954543	0.191109	1.11236	5.069	5.35898	5.89054	0.213687	9.37156	9.46127	9.59286	0.393594	8.35673	9.58359	8.66936	0.415012	7.92821	-0.645294	-0.565037	-0.428597	0.241294	0.255039	0.274966	0.0759431	0.273571	0.128931	0.803409	3	impa2	nm_014214
chr16	73053984	73054665	+	55	5	73054352	0.477773	1.92409	3.39264	2.86115	2.54963	0.261173	3.47485	4.41771	3.58652	0.138915	3.02571	3.77815	3.03102	0.311259	3.34638	0.0198078	-0.226004	-0.392309	0.0543509	0.400701	0.0999853	-0.145325	0.175079	-0.142797	0.384514	3	zfhx3	nm_006885
chr8	54857314	54858007	+	63	4	54857696	0.254812	1.98421	4.35056	3.95111	4.96739	0.118715	5.10698	6.66339	6.17919	0.231526	3.96224	4.93002	5.14947	0.276675	5.02893	-0.20905	-0.347992	-0.0177622	0.0222185	0.406005	0.297166	-0.343934	-0.0286572	0.0341735	0.433398	3	rgs20	nm_003702
chr10	31364410	31364751	+	42	5	31364546	0.286664	1.53326	5.46813	4.95025	5.4949	0.261173	8.58183	7.69419	8.9447	0.231526	9.0051	8.98462	9.09305	0.380428	7.57964	-0.471081	-0.614629	-0.464035	0.179155	0.0216396	0.238903	0.248613	0.245328	0.262636	0.663148	3	znf438	nm_001143767
chr14	30664105	30664546	+	33	3	30664302	0.254812	1.32281	10.4573	10.6725	8.92372	0.166201	11.0037	9.86623	11.9695	0.115763	12.1389	13.3157	12.5804	0.276675	11.2142	-0.100816	-0.0714229	-0.32961	-0.0273401	-0.184757	0.0940321	0.114307	0.247797	0.165845	0.127928	3	prkd1	nm_002742
chr3	177243897	177244401	+	45	7	177244129	0.191109	1.413	6.34623	6.22187	6.06637	0.23743	7.1603	6.33206	6.78414	0.254678	6.73581	7.69452	7.46347	0.138337	6.75609	-0.0902881	-0.11884	-0.155353	0.0838317	-0.0935131	0.00597871	-0.0043356	0.187643	0.14366	0.12026	3	linc00578	nr_047568
chr17	14641444	14642051	+	64	10	14641758	0.382219	2.25479	3.31281	4.2236	4.04425	0.451117	7.26559	7.62056	6.52487	0.347289	5.72724	6.86517	5.21465	0.345844	5.64431	-0.76874	-0.418322	-0.480925	0.364285	0.4331	0.209154	0.0210442	0.282499	-0.114225	0.891509	3	cdrt7	nr_033371
chr1	208376557	208377312	+	54	5	208377013	0.41407	1.83389	6.10675	5.7223	5.75866	0.284916	8.84507	8.39366	8.21011	0.347289	9.25724	8.24742	7.59384	0.311259	7.57056	-0.309996	-0.403804	-0.394667	0.224474	0.1489	0.117001	0.290182	0.123542	0.0044296	0.532947	3	plxna2	nm_025179
chr3	29566650	29567293	+	56	5	29566904	0.222961	1.77377	2.91368	2.08909	2.81339	0.356145	5.52817	4.74904	4.49395	0.277831	3.13377	2.62627	3.32434	0.622518	3.51908	-0.272357	-0.75232	-0.322889	0.651604	0.432439	0.352787	-0.167297	-0.422182	-0.0821293	0.928132	3	rbms3	nm_014483
chrx	135212950	135213481	+	34	5	135213211	0.191109	1.05223	1.27723	1.27162	1.23086	0.213687	1.47418	1.76709	1.90129	0.208373	1.47684	1.6587	1.5644	0.103753	1.51358	-0.244946	-0.251291	-0.298297	-0.0380507	0.22341	0.329015	-0.0354525	0.13209	0.047644	0.436303	3	fhl1	nr_027621
chr7	117222171	117222861	+	68	6	117222548	0.382219	2.10447	0.558787	1.22621	0.879184	0.308659	1.31623	1.14124	1.51239	0.393594	0.756428	1.01365	1.10811	0.276675	1.05691	-0.919488	0.214344	-0.265621	0.316554	0.110747	0.51697	-0.482584	-0.0603008	0.0682474	0.638345	3	cftr	nm_000492
chr5	172222176	172222861	+	44	4	172222683	0.159258	1.38294	3.99134	5.08649	3.73653	0.308659	7.21295	7.62056	7.30267	0.324136	6.62775	6.63479	6.5835	0.380428	6.08851	-0.609216	-0.259418	-0.704389	0.244499	0.323808	0.262336	0.12243	0.123962	0.112766	0.801222	3	dusp1	nm_004417
chr11	88053179	88053697	+	39	6	88053438	0.222961	1.413	0.23948	0.317906	0.307715	0.261173	0.315895	0.2577	0.475322	0.324136	0.432245	0.3686	0.488874	0.415012	0.355971	-0.571851	-0.16316	-0.210166	-0.172311	-0.466066	0.417147	0.28009	0.0502962	0.457704	0.241315	3	ctsc	nm_148170
chr1	42238659	42239427	+	81	12	42239026	0.41407	2.55543	2.71411	2.36158	2.63755	0.427374	4.73843	4.19683	5.31496	0.185221	3.27786	3.54777	3.16138	0.622518	3.55005	-0.387362	-0.588085	-0.428641	0.416569	0.241459	0.582219	-0.115089	-0.000927784	-0.167285	0.881445	3	hivep3	nm_001127714
chr2	100279076	100279901	+	87	10	100279312	0.191109	2.70575	1.91584	1.72577	2.63755	0.094972	2.31657	2.577	2.20377	0.138915	1.98112	2.48805	2.77029	0.172922	2.29066	-0.257785	-0.408521	0.203436	0.0162236	0.169928	-0.0557936	-0.209447	0.11925	0.27427	0.197743	3	rev1	nm_001037872
chr8	24062284	24062801	+	61	10	24062520	0.222961	2.22472	4.55013	4.76859	3.07715	0.118715	4.68578	6.1848	6.48166	0.138915	4.93479	5.66722	4.69319	0.103753	5.00481	-0.137409	-0.0697545	-0.701723	-0.0950259	0.305411	0.373048	-0.0203262	0.179325	-0.0927472	0.49744	3	adam28	nm_021777
chr7	19444385	19445197	+	74	9	19444675	0.222961	2.31492	3.95143	4.13277	3.86841	0.261173	4.84373	4.3809	5.18533	0.162068	5.8353	5.94367	5.8013	0.207506	4.88254	-0.305258	-0.240521	-0.33589	-0.0115131	-0.156404	0.0868047	0.257176	0.283722	0.248746	0.266852	3	ferd3l	nm_152898
chr4	169687555	169688156	+	36	4	169687816	0.286664	1.38294	4.90935	6.13104	4.65968	0.427374	6.79175	5.96392	6.04955	0.486204	6.41163	7.37199	6.64868	0.276675	6.10418	-0.314266	0.00633469	-0.389567	0.153987	-0.0335369	-0.0129681	0.0708943	0.272258	0.123272	0.268326	3	palld	nm_001166110
chr7	137352245	137352901	+	97	14	137352552	0.382219	3.06651	5.54796	5.90396	5.27511	0.47486	5.10698	6.88427	5.91992	0.208373	7.96051	8.80032	8.96269	0.242091	6.70686	-0.273679	-0.183953	-0.346436	-0.393167	0.0376675	-0.180059	0.247223	0.391919	0.418295	0.0895032	3	dgki	nm_004717
chr2	109741776	109742567	+	88	6	109742274	0.318515	2.76587	2.0755	1.90743	1.80233	0.546089	2.47451	3.12921	1.85808	0.254678	2.41337	2.34982	2.80288	0.207506	2.31257	-0.156041	-0.277864	-0.359635	0.0976483	0.436304	-0.315687	0.0615497	0.0230549	0.277411	0.337268	3	sh3rf3	nm_001099289
chr8	119808863	119809301	+	60	8	119809177	0.191109	2.10447	5.14883	4.814	4.57176	0.142458	6.8444	6.11117	6.78414	0.185221	5.69122	6.17404	5.8013	0.138337	5.77121	-0.164629	-0.261637	-0.336124	0.246051	0.0825759	0.233293	-0.020135	0.0973425	0.00750373	0.441437	3	tnfrsf11b	nm_002546
chr12	116757812	116758176	+	41	6	116757830	0.286664	1.98421	5.18874	6.22187	4.79156	0.546089	7.10765	7.17879	6.91377	0.416746	9.50938	9.07677	9.90784	0.415012	7.32182	-0.496818	-0.234854	-0.611708	-0.04283	-0.0284619	-0.0827283	0.37715	0.309976	0.436369	0.396453	3	med13l	nm_015335
chr6	13508713	13509631	+	68	9	13509042	0.286664	2.07441	1.27723	0.817472	0.615429	0.379888	0.895037	1.50939	1.25312	0.370441	1.18867	1.24402	1.33626	0.415012	1.12629	0.181436	-0.46234	-0.871916	-0.331561	0.422381	0.153946	0.0777711	0.143434	0.246615	0.465862	3	gfod1	nm_018988
chr10	60616100	60616620	+	34	4	60616328	0.222961	1.0823	4.70978	4.31443	4.43988	0.569832	7.055	6.58976	6.69772	0.162068	6.62775	6.26619	6.45313	0.311259	5.90596	-0.326512	-0.453001	-0.411651	0.256474	0.158054	0.181498	0.166348	0.0854176	0.127828	0.59573	3	fam133cp	nr_027508
chr5	95194625	95195180	+	80	14	95194922	0.159258	2.826	4.23082	4.58692	4.61572	0.261173	8.58183	7.17879	6.69772	0.208373	4.61061	5.98974	4.20432	0.415012	5.63294	-0.412951	-0.296361	-0.287333	0.607396	0.349852	0.249782	-0.288931	0.0886062	-0.422017	0.734558	3	c5orf27	nr_026936
chr11	71010398	71010851	+	43	6	71010640	0.127406	1.44306	2.83385	3.13364	3.69257	0.213687	3.94869	5.4117	4.32111	0.486204	4.53857	5.11432	5.34502	0.484181	4.25994	-0.58807	-0.442994	-0.206207	-0.109459	0.345248	0.0205679	0.0914036	0.263709	0.327362	0.497876	3	shank2	nm_012309
chr2	208103569	208104684	+	154	13	208104034	0.222961	4.59977	8.70112	8.94677	8.35225	0.284916	11.4249	9.7926	9.85213	0.138915	9.43734	10.5972	10.4293	0.172922	9.72596	-0.16064	-0.120473	-0.219676	0.232267	0.00985135	0.0185947	-0.0434603	0.123776	0.100731	0.253834	3	ac007879,2	nr_110283
chr7	20073068	20073670	+	51	5	20073385	0.350367	1.68358	3.19307	3.63321	3.69257	0.189944	5.31757	4.67541	5.0557	0.277831	4.14234	4.93002	5.93167	0.311259	4.50795	-0.497528	-0.311228	-0.287845	0.238296	0.0526221	0.165438	-0.122025	0.129121	0.395966	0.517652	3	ac005062,2	nr_110114
chr13	75335826	75336642	+	67	10	75336084	0.445922	2.07441	1.67636	1.63494	2.02212	0.284916	2.47451	2.42974	2.03092	0.0463052	2.55745	2.34982	2.28141	0.242091	2.16192	-0.36698	-0.403073	-0.0964423	0.194831	0.16849	-0.0901795	0.242391	0.120238	0.0776127	0.379879	3	linc00347	nr_034025
chr4	15402226	15403113	+	79	12	15402677	0.509625	2.4953	5.6677	6.99392	5.89054	0.261173	10.4245	10.4184	9.03112	0.277831	9.04112	9.86004	8.79973	0.207506	8.45857	-0.577651	-0.274312	-0.522016	0.301499	0.300654	0.0944903	0.0960867	0.221179	0.0570448	0.690207	3	c1qtnf7	nm_001135171
chr10	104542352	104543425	+	177	17	104542946	0.509625	5.26117	4.86943	5.81313	4.35196	0.451117	7.79209	7.39967	7.21625	0.370441	8.39275	8.20134	7.88716	0.380428	6.88042	-0.498743	-0.243181	-0.660831	0.179513	0.104964	0.0687528	0.286647	0.253363	0.19701	0.585328	3	wbp1l	nm_017787
chr2	225848030	225848635	+	39	5	225848340	0.318515	1.62345	5.30848	5.63147	5.01135	0.522346	6.89705	5.6694	5.8335	0.254678	6.19551	5.85152	6.09463	0.55335	5.83254	-0.135827	-0.0506135	-0.218926	0.241854	-0.0409293	0.000235596	0.0870967	0.00468572	0.0634125	0.202175	3	mir4439	nr_039641
chr15	36166333	36166939	+	98	17	36166633	0.637031	3.06651	0.918008	1.18079	1.09898	0.47486	1.42153	1.14124	1.29633	0.694577	2.41337	1.4744	1.75995	0.518765	1.41162	-0.620775	-0.257598	-0.361188	0.0100903	-0.306748	-0.122918	0.773693	0.0627729	0.318177	0.273329	3	mir4510	nr_039735
chr14	53477656	53478178	+	46	7	53477925	0.41407	1.68358	4.90935	4.76859	3.78049	0.23743	7.42354	5.59577	5.8335	0.254678	5.36704	5.16039	5.60575	0.207506	5.38271	-0.132803	-0.174772	-0.509759	0.463774	0.0560036	0.116027	-0.00420765	-0.0608522	0.0585746	0.48438	3	fermt2	nm_001135000
chr5	78731942	78732541	+	86	3	78732242	0.0955546	2.61555	0.558787	0.772057	1.09898	0.189944	2.00067	0.993986	1.03707	0.231526	1.765	1.6587	1.9555	0.207506	1.31564	-1.23539	-0.768984	-0.259597	0.604722	-0.404465	-0.343254	0.423905	0.334289	0.571772	0.706991	3	homer1	nm_001277078
chr2	121297914	121298437	+	51	8	121298154	0.382219	1.71364	3.2729	3.76945	3.51674	0.498603	3.84339	4.45453	4.49395	0.532509	4.68265	5.34469	4.07395	0.380428	4.16136	-0.346487	-0.142701	-0.242818	-0.114675	0.0982171	0.110929	0.170269	0.361052	-0.030628	0.275493	3	linc01101	nr_027181
chr18	74452307	74452737	+	26	2	74452512	0.159258	0.901915	0.678528	0.590396	0.791266	0.427374	0.895037	0.478586	0.950644	0.439899	0.720408	1.05972	1.01034	0.449597	0.797214	-0.23256	-0.433284	-0.0108047	0.16698	-0.73619	0.253938	-0.146154	0.410649	0.341801	0.120459	3	loc100131655	nr_040024
chr1	98366503	98366954	+	34	1	98366718	0.318515	1.35287	1.51671	1.63494	1.71441	0.094972	2.47451	2.42974	2.59267	0.324136	2.26928	3.1331	2.96583	0.172922	2.30347	-0.602863	-0.494566	-0.426095	0.103338	0.0769971	0.170629	-0.0215693	0.443783	0.364631	0.62483	3	dpyd	nm_000110
chr12	77277540	77278107	+	38	5	77277836	0.222961	1.26268	0.279394	0.363321	0.263755	0.332402	0.210597	0.404957	0.432111	0.347289	0.432245	0.3686	0.293324	0.276675	0.3387	-0.27771	0.101234	-0.360809	-0.685525	0.25776	0.351392	0.351838	0.122045	-0.207513	0.153637	3	csrp2	nm_001321
chr2	201117330	201117806	+	35	4	201117579	0.318515	1.29275	0.878095	0.908302	1.09898	0.23743	1.00034	1.0308	1.51239	0.370441	1.18867	1.2901	1.27107	0.380428	1.13097	-0.365115	-0.316319	-0.0413969	-0.177079	-0.133798	0.419266	0.0717889	0.189919	0.168483	0.277073	3	spats2l	nm_001282735
chr3	112529979	112530887	+	104	11	112530545	0.732586	3.18677	5.14883	4.67775	4.87947	0.522346	6.58115	7.28923	7.43231	0.300984	4.57459	6.12797	5.11688	0.55335	5.75869	-0.161496	-0.299924	-0.239014	0.192601	0.340026	0.36807	-0.332098	0.089669	-0.170476	0.533711	3	cd200r1l	nm_001199215
chr13	36474433	36475030	+	49	6	36474728	0.382219	1.59338	3.03342	1.58953	2.54963	0.261173	4.05399	3.82869	3.58652	0.254678	2.55745	3.22525	3.4873	0.172922	3.10131	-0.0319328	-0.964278	-0.282586	0.386466	0.303973	0.209708	-0.278172	0.0565327	0.169234	0.726315	3	mir548f5	nr_031646
chr4	126243262	126243576	+	38	5	126243279	0.286664	1.44306	2.83385	3.22447	2.59359	0.23743	4.15929	3.75506	4.2779	0.347289	3.42194	4.00852	3.71544	0.622518	3.55445	-0.326863	-0.140564	-0.454674	0.22671	0.0792082	0.267275	-0.0548137	0.173443	0.0639067	0.498432	3	fat4	nm_024582
chr3	66083848	66084449	+	45	6	66084140	0.350367	1.65351	2.55446	2.58866	2.19796	0.308659	3.58015	3.3501	4.06184	0.324136	4.10632	4.9761	4.95392	0.345844	3.59661	-0.493622	-0.474433	-0.710473	-0.0066194	-0.102434	0.175496	0.191209	0.468375	0.461932	0.581657	3	slc25a26	nm_173471
chr11	113545775	113546276	+	50	7	113546020	0.41407	1.7437	3.55229	3.45155	2.76943	0.379888	6.10731	5.48533	5.4446	0.578815	4.89877	6.08189	5.0191	0.276675	4.7567	-0.42121	-0.462717	-0.780371	0.360577	0.205618	0.194865	0.04246	0.35456	0.0774697	0.808453	3	tmprss5	nm_030770
chr15	67341780	67342747	+	68	9	67342037	0.509625	2.07441	7.7432	8.81053	7.47307	0.332402	9.79276	9.71897	11.2781	0.277831	8.50081	10.3669	8.79973	0.380428	9.16489	-0.243188	-0.0568892	-0.294417	0.0955974	0.084686	0.299334	-0.108517	0.17779	-0.0586587	0.358037	3	smad3	nm_005902
chr5	133802008	133802476	+	31	3	133802278	0.191109	1.23262	4.90935	5.08649	5.58282	0.451117	9.52951	8.87224	9.7225	0.231526	7.99653	10.3208	7.91976	0.380428	7.77111	-0.66259	-0.61145	-0.477126	0.294282	0.191179	0.323206	0.0412529	0.409361	0.0273355	0.853277	3	loc102546229	nr_105044
chr3	15839346	15839859	+	34	4	15839672	0.191109	1.29275	4.62995	4.54151	3.82445	0.308659	4.79108	4.23364	5.22854	0.185221	4.57459	5.43684	5.0517	0.242091	4.70137	-0.0220831	-0.0499086	-0.297827	0.0272705	-0.151181	0.153328	-0.0394384	0.209689	0.103687	0.133079	3	ankrd28	nm_001195098
chr2	47194158	47194841	+	66	5	47194552	0.127406	2.13453	4.07117	5.04108	4.57176	0.261173	5.26492	5.59577	5.40139	0.185221	4.57459	5.48292	5.4428	0.0691687	5.0496	-0.310727	-0.00243708	-0.143419	0.0602439	0.148169	0.0971611	-0.142526	0.118776	0.108179	0.254052	3	mcfd2	nm_001171508
chr10	112170053	112170546	+	38	6	112170346	0.222961	1.35287	2.47463	2.58866	2.94527	0.546089	2.42186	3.8655	3.58652	0.463052	3.92622	4.10067	3.78062	0.415012	3.29888	-0.414766	-0.349773	-0.16358	-0.44586	0.228677	0.120607	0.251163	0.313882	0.196646	0.27718	3	dusp5	nm_004419
chr3	157029294	157029821	+	36	4	157029524	0.191109	1.23262	4.98917	5.58606	5.62678	0.094972	7.10765	8.13596	7.17304	0.300984	6.15949	7.04947	6.87683	0.207506	6.52272	-0.386672	-0.223642	-0.213163	0.123899	0.31884	0.137112	-0.0826626	0.112042	0.0762701	0.467776	3	ptx3	nm_002852
chr11	10060361	10060877	+	42	7	10060620	0.222961	1.50319	1.07766	0.999132	1.1869	0.142458	1.42153	1.8039	1.5556	0.185221	1.5849	2.11945	2.02068	0.276675	1.52997	-0.505601	-0.614758	-0.366308	-0.106061	0.237615	0.0239656	0.0508842	0.470184	0.401335	0.547395	3	sbf2	nm_030962
chr2	161224234	161224903	+	76	8	161224628	0.127406	2.31492	3.91151	2.95198	2.54963	0.213687	2.73776	3.97594	3.71615	0.300984	3.56602	4.0546	4.23691	0.207506	3.52228	0.151217	-0.254825	-0.466218	-0.363513	0.174788	0.0773013	0.0178051	0.203049	0.266502	0.152801	3	mir4785	nr_039946
chr13	40638819	40639434	+	99	10	40639187	0.318515	3.21683	2.47463	2.04368	1.53857	0.166201	3.2116	3.71824	3.67294	0.277831	2.77357	2.44197	2.44437	0.345844	2.70218	-0.126909	-0.402953	-0.812529	0.249172	0.4605	0.442815	0.0376224	-0.146075	-0.144659	0.831626	3	linc00332	nr_046870
chr8	38794100	38795159	+	60	6	38794411	0.382219	1.80383	10.7367	10.8542	10.9019	0.356145	15.6368	13.3636	13.4386	0.208373	11.4545	11.9334	13.1996	0.518765	12.391	-0.206746	-0.191043	-0.184719	0.33565	0.10901	0.117091	-0.113385	-0.0542903	0.0911964	0.38142	3	plekha2	nm_021623
chr2	161886876	161887677	+	114	7	161887225	0.382219	3.5776	4.66987	4.13277	4.61572	0.332402	5.79142	5.4117	5.79029	0.277831	4.89877	5.89759	5.86649	0.311259	5.23051	-0.163571	-0.339842	-0.180397	0.146964	0.0491297	0.146682	-0.094532	0.173174	0.165544	0.342195	3	tank	nm_004180
chr12	46949780	46950416	+	71	6	46950142	0.159258	2.28485	4.39047	4.95025	5.27511	0.261173	6.9497	7.731	7.30267	0.115763	7.34816	7.92489	8.11531	0.276675	6.66528	-0.60229	-0.429166	-0.337466	0.0602842	0.213989	0.131759	0.140716	0.249725	0.283979	0.591651	3	slc38a2	nm_018976
chr14	56054881	56055614	+	74	4	56055254	0.318515	2.34498	0.878095	0.408736	1.05502	0.308659	1.36888	0.993986	0.821011	0.463052	1.18867	1.24402	1.49921	0.345844	1.05085	-0.259107	-1.36231	0.00571718	0.381441	-0.0802577	-0.356082	0.177797	0.243459	0.512651	0.520268	3	ktn1	nm_001079522
chr7	114649592	114650282	+	90	4	114650005	0.41407	2.79594	2.19524	2.17992	2.11004	0.308659	3.05366	3.05559	2.89514	0.208373	2.3053	2.85665	2.37919	0.207506	2.55897	-0.221187	-0.231285	-0.278291	0.254974	0.255886	0.178072	-0.150606	0.15876	-0.105095	0.473232	3	mdfic	nm_001166346
chr5	75986692	75987378	+	115	10	75987054	0.382219	3.69785	3.5922	3.54238	4.00029	0.522346	3.94869	4.08639	4.45074	0.439899	4.57459	4.00852	5.37761	0.449597	4.17571	-0.217153	-0.237305	-0.0619182	-0.0806474	-0.0311969	0.0920236	0.13162	-0.0589524	0.364943	0.165518	3	ncrupar	nr_028375
chr8	67041915	67042965	+	112	12	67042210	0.254812	3.33709	1.55662	1.45328	1.75837	0.23743	1.94802	2.577	2.24698	0.138915	2.05316	1.93515	2.34659	0	1.98613	-0.351542	-0.450645	-0.175723	-0.0279509	0.375732	0.178025	0.0478869	-0.0375167	0.240608	0.501239	3	trim55	nm_184087
chr1	24616338	24616847	+	37	3	24616568	0.159258	1.32281	2.3948	2.58866	2.54963	0.47486	3.3169	3.53417	3.41368	0.463052	2.48541	2.71842	2.77029	0.242091	2.86355	-0.257898	-0.1456	-0.167515	0.212031	0.303567	0.253521	-0.204324	-0.0750359	-0.047771	0.44671	3	grhl3	nm_198174
chr3	177553763	177554241	+	41	6	177553972	0.254812	1.47313	6.38614	7.31183	5.45094	0.071229	9.16097	8.72499	8.90149	0.231526	9.25724	9.62967	10.2664	0.345844	8.34329	-0.385672	-0.190384	-0.61411	0.134883	0.0645366	0.0934297	0.149966	0.206869	0.299235	0.494339	3	rp11-91k9,1	nr_110826
chr10	78343394	78343904	+	47	8	78343677	0.318515	1.56332	3.67203	3.49696	3.3409	0.189944	3.68545	4.30727	5.87671	0.208373	4.64663	5.16039	5.31243	0.276675	4.38875	-0.257233	-0.327709	-0.393574	-0.251972	-0.0270366	0.421197	0.0823737	0.23367	0.275561	0.373568	3	c10orf11	nm_032024
chr5	172295713	172296601	+	99	12	172296326	0.477773	3.03645	7.58354	7.67515	7.95662	0.403631	11.8461	11.4861	10.7164	0.324136	9.97765	11.7952	10.5271	0.138337	9.95152	-0.392045	-0.374722	-0.322762	0.25142	0.206894	0.106824	0.00378212	0.245209	0.0811163	0.551556	3	ergic1	nm_001031711
chr13	45478983	45479683	+	139	15	45479328	0.509625	4.29913	1.4768	1.13538	0.923144	0.498603	1.36888	1.10443	1.5556	0.532509	1.90908	2.0273	1.49921	0.311259	1.44442	0.0319756	-0.347322	-0.645867	-0.0774982	-0.387194	0.106976	0.402384	0.489064	0.0537112	0.201166	3	nufip1	nm_012345
chr4	26511626	26512355	+	69	10	26512064	0.477773	2.1646	3.47246	4.17819	3.47278	0.379888	5.00168	5.26444	4.45074	0.347289	4.93479	5.66722	5.18206	0.311259	4.62493	-0.413472	-0.146554	-0.413341	0.11298	0.186849	-0.0553855	0.093558	0.29321	0.164095	0.405937	3	cckar	nm_000730
chr5	106761273	106761776	+	46	7	106761618	0.286664	1.56332	2.11541	1.54411	1.45065	0.261173	2.63246	2.50337	3.37047	0.324136	2.84561	3.08702	3.25916	0.415012	2.53425	-0.260623	-0.714781	-0.804856	0.0548526	-0.0176874	0.411388	0.167178	0.284656	0.36294	0.742938	3	efna5	nm_001962
chr2	204546695	204547026	+	30	4	204546823	0.191109	1.26268	7.4638	8.31096	6.50596	0.308659	8.16063	10.0871	9.37681	0.254678	8.64489	9.26107	8.73455	0.207506	8.50509	-0.188415	-0.0333105	-0.386563	-0.0596453	0.246116	0.140771	0.023522	0.122852	0.0384066	0.311843	3	cd28	nm_001243078
chrx	109330661	109331254	+	60	7	109330957	0.127406	1.98421	3.39264	3.13364	2.98923	0.071229	2.47451	4.04957	3.45689	0.162068	3.53	3.8703	3.84581	0.0691687	3.41584	-0.00983398	-0.124401	-0.192469	-0.465096	0.245528	0.0172322	0.0474259	0.180203	0.171045	0.0414561	3	mir3978	nr_039774
chr1	8963997	8964326	+	31	4	8964164	0.191109	0.992107	7.38398	8.08389	8.0885	0.47486	13.4782	11.4492	11.9695	0.509357	10.1577	10.3669	8.99528	0.242091	9.99702	-0.4371	-0.306449	-0.305626	0.431058	0.195682	0.25979	0.0230108	0.0524097	-0.15233	0.645235	3	eno1	nm_001428
chr1	107520854	107521394	+	49	6	107521148	0.350367	1.56332	0.35922	0.136245	0.395633	0.142458	0.263246	0.2577	0.3889	0.277831	0.252143	0.3686	0.293324	0.276675	0.301668	0.251908	-1.14676	0.391201	-0.196549	-0.227269	0.366437	-0.258721	0.289093	-0.0404648	0.148755	3	prmt6	nm_018137
chr10	35742669	35743263	+	48	7	35742977	0.318515	1.59338	2.27506	1.63494	1.97816	0.403631	3.05366	3.42373	2.7223	0.486204	2.77357	4.19282	3.12879	0.311259	2.79812	-0.298549	-0.775215	-0.500293	0.126082	0.291113	-0.03963	-0.0127114	0.583466	0.161151	0.65054	3	ccny	nm_145012
chr5	148514992	148515507	+	69	12	148515211	0.318515	2.31492	2.31498	2.407	3.03319	0.427374	3.4222	3.71824	3.45689	0.347289	3.45796	4.33105	3.45471	0.311259	3.28847	-0.506418	-0.450179	-0.116581	0.0575089	0.177206	0.0720583	0.0725047	0.3973	0.0711487	0.459984	3	ablim3	nm_014945
chr17	76875638	76876001	+	27	3	76875853	0.222961	0.931979	5.14883	5.22274	6.15429	0.332402	6.7391	5.9271	5.74708	0.254678	5.8353	7.04947	6.29018	0.311259	6.01268	-0.223763	-0.203201	0.0335855	0.164549	-0.0206805	-0.0651791	-0.0431996	0.229507	0.0650935	0.157356	3	loc100653515	nm_001243541
chr11	46670762	46671247	+	37	6	46670964	0.254812	1.29275	2.51454	2.17992	2.02212	0.189944	3.79074	3.68143	3.75937	0.138915	3.24183	3.5017	3.32434	0.242091	3.11289	-0.307958	-0.513976	-0.622383	0.284227	0.242012	0.272235	0.0585563	0.1698	0.0948145	0.747597	3	atg13	nm_014741
chr2	18158135	18159066	+	82	6	18158514	0.573328	2.4953	4.82952	4.99566	5.4949	0.261173	5.37022	5.96392	6.09276	0.347289	6.51969	6.22012	5.67094	0.345844	5.68419	-0.235076	-0.18628	-0.0488614	-0.0819736	0.0693044	0.100142	0.197848	0.129987	-0.00336831	0.185896	3	kcns3	nm_002252
chr21	35708633	35709523	+	114	7	35709145	0.350367	3.42728	3.91151	3.86028	2.85735	0.47486	6.15996	5.74303	5.91992	0.138915	5.69122	6.54264	6.06204	0.276675	5.19422	-0.40918	-0.4282	-0.862229	0.246015	0.144906	0.188671	0.131832	0.332967	0.222896	0.759733	3	kcne2	nm_172201
chr2	20001245	20001776	+	55	8	20001394	0.254812	1.86396	1.39697	1.22621	1.1869	0.617318	1.63213	1.5462	1.59881	0.439899	1.72898	1.42832	1.9555	0.242091	1.52222	-0.12388	-0.311977	-0.358983	0.100573	0.0225471	0.0708189	0.18374	-0.0918571	0.361354	0.329593	3	linc00954	nr_033875
chr7	134617431	134617965	+	57	6	134617694	0.41407	2.01428	5.54796	6.17645	5.27511	0.356145	6.21261	6.40569	6.65451	0.532509	7.27612	6.31227	6.15981	0.484181	6.2245	-0.166001	-0.0111799	-0.238758	-0.00275909	0.0413947	0.0963735	0.22521	0.0202001	-0.0150726	0.183649	3	cald1	nm_033140
chr3	12234836	12235349	+	36	5	12235108	0.159258	1.17249	2.9935	2.81574	2.85735	0.332402	4.63313	4.71223	4.79643	0.231526	4.93479	4.46927	4.49764	0.345844	4.0789	-0.446344	-0.534668	-0.513502	0.183808	0.20823	0.233782	0.27481	0.13186	0.140988	0.706778	3	timp4	nm_003256
chr3	127500183	127500574	+	35	5	127500364	0.191109	1.20255	4.86943	5.63147	4.96739	0.308659	8.63447	7.69419	7.47552	0.370441	7.45622	6.95732	7.7568	0.380428	6.82698	-0.487494	-0.277735	-0.458759	0.338861	0.172521	0.130926	0.127197	0.0272839	0.184214	0.622099	3	mgll	nm_001256585
chr1	78695138	78695438	+	31	5	78695212	0.191109	1.20255	1.27723	1.77119	1.31878	0.142458	2.63246	2.24567	2.50624	0.347289	1.54888	1.61262	1.46662	0.345844	1.81997	-0.510895	-0.0391934	-0.464711	0.532501	0.303236	0.461615	-0.232689	-0.174502	-0.311415	0.770717	3	mgc27382	nr_027310
chr6	133823493	133824366	+	66	6	133823970	0.509625	2.04434	3.5922	3.49696	2.81339	0.189944	4.63313	5.70622	6.39524	0.185221	4.21439	3.82422	3.74803	0.518765	4.26931	-0.249133	-0.2879	-0.601693	0.117985	0.418531	0.582996	-0.0186806	-0.158837	-0.187869	0.752747	3	eya4	nm_172103
chr8	69833193	69833693	+	38	6	69833418	0.159258	1.29275	6.06683	6.26728	6.19825	0.142458	6.37056	7.58374	8.21011	0.138915	7.70836	8.15527	8.57159	0.0691687	7.23689	-0.254425	-0.207529	-0.223509	-0.18395	0.0675407	0.182032	0.091055	0.172363	0.244193	0.250362	3	rp11-600k15,1	nr_039986
chr1	8264344	8265210	+	49	7	8264632	0.286664	1.50319	4.23082	5.17732	4.83551	0.332402	4.73843	5.00674	5.79029	0.185221	4.75469	6.03582	5.37761	0.415012	5.10525	-0.271044	0.0202245	-0.0783119	-0.107572	-0.0281087	0.181653	-0.10263	0.241568	0.0749845	0.125035	3	slc45a1	nm_001080397
chr2	85442686	85443051	+	33	4	85442767	0.318515	1.53326	1.1974	1.68036	1.67045	0.403631	2.21127	2.61381	1.90129	0.370441	1.33275	2.0273	1.89031	0.449597	1.83611	-0.616742	-0.12788	-0.136411	0.268225	0.509508	0.0503285	-0.462238	0.14291	0.0419759	0.569698	3	tcf7l1	nm_031283
chr15	39420436	39420876	+	54	8	39420580	0.191109	1.92409	8.86077	9.628	7.69286	0.118715	9.47686	10.9338	11.8831	0.185221	9.3653	9.99827	9.6797	0.415012	9.7243	-0.134161	-0.0143576	-0.338073	-0.0371843	0.169135	0.28924	-0.0542684	0.040084	-0.00663111	0.302594	3	c15orf54	nm_207445
chr16	53698726	53699468	+	94	13	53699188	0.286664	2.826	5.86727	5.67689	5.18719	0.261173	7.26559	5.52214	4.96928	0.370441	5.51112	7.09554	7.49607	0.242091	6.06568	-0.0479796	-0.0955684	-0.225716	0.260412	-0.13544	-0.287633	-0.138323	0.226245	0.305465	0.0688678	3	rpgrip1l	nm_015272
chr9	113758685	113759476	+	75	11	113758974	0.222961	2.25479	2.87376	3.13364	3.16506	0.403631	6.00201	5.74303	5.14212	0.62512	4.75469	4.93002	4.59541	0.587934	4.4822	-0.641264	-0.516365	-0.501971	0.421241	0.357606	0.198158	0.0851461	0.137388	0.0359894	0.878868	3	lpar1	nm_001401
chr7	40364399	40364905	+	44	6	40364632	0.191109	1.413	3.71194	3.13364	3.42882	0.356145	5.21227	4.41771	4.71001	0.208373	6.55571	7.46414	7.33311	0.311259	5.10748	-0.460438	-0.704773	-0.574901	0.0293	-0.209313	-0.116883	0.360139	0.547364	0.521812	0.481072	3	sugct	nm_001193313
chr3	131854775	131855262	+	35	5	131854974	0.222961	1.29275	8.02259	8.44721	8.0885	0.403631	9.63481	9.16676	9.24717	0.509357	10.3379	12.3942	11.9285	0.311259	9.6964	-0.273381	-0.198974	-0.261577	-0.00919254	-0.0810371	-0.0684363	0.0924157	0.35414	0.298895	0.191755	3	cpne4	nm_153429
chr12	116864108	116864544	+	26	3	116864330	0.222961	0.901915	4.55013	4.40526	4.22009	0.427374	7.47619	6.4425	7.17304	0.347289	4.97081	4.7918	4.56282	0.484181	5.39918	-0.246834	-0.293512	-0.355469	0.469563	0.25488	0.409844	-0.119259	-0.172175	-0.242814	0.676701	3	mir4472-2	nr_039683
chr13	45293956	45294676	+	55	9	45294069	0.0637031	1.65351	5.82735	5.7223	5.09927	0.094972	6.26526	5.96392	6.39524	0.138915	5.87132	6.95732	7.13756	0.138337	6.13773	-0.0748634	-0.101109	-0.267414	0.0296697	-0.0414447	0.0592945	-0.0640188	0.180827	0.217726	0.163635	3	linc00330	nr_038433
chr1	22091269	22091909	+	44	5	22091650	0.286664	1.35287	1.67636	2.45242	1.67045	0.332402	2.15862	2.42974	2.7223	0.277831	2.16122	2.11945	2.54214	0.345844	2.21474	-0.401807	0.147063	-0.406903	-0.0370321	0.133663	0.297685	-0.0352924	-0.063452	0.198905	0.351988	3	usp48	nm_032236
chr9	4302044	4302552	+	45	5	4302266	0.350367	1.68358	1.99567	1.86202	2.24192	0.379888	2.00067	2.39293	2.67909	0.393594	2.44939	3.40955	2.83547	0.172922	2.42963	-0.283866	-0.383871	-0.116003	-0.280255	-0.0219609	0.141003	0.0116819	0.488841	0.222849	0.207509	3	glis3	nm_001042413
chr11	86459340	86459844	+	57	9	86459627	0.477773	1.98421	5.78744	6.53977	6.63784	0.403631	7.89739	8.2464	7.43231	0.231526	9.3653	9.49144	8.99528	0.311259	7.82146	-0.434513	-0.258198	-0.236724	0.0139365	0.0763261	-0.0736283	0.259887	0.279189	0.201729	0.315356	3	prss23	nm_007173
chr15	58732416	58732726	+	31	5	58732568	0.222961	1.0823	5.26857	5.22274	5.18719	0.356145	8.21328	7.84144	9.50644	0.185221	6.91591	7.97097	8.08271	0.415012	7.13436	-0.437374	-0.449978	-0.459832	0.203174	0.136335	0.414121	-0.0448643	0.159971	0.180056	0.700271	3	lipc	nm_000236
chr18	42746099	42746853	+	74	11	42746554	0.509625	2.40511	2.23515	2.72491	2.59359	0.284916	3.3169	4.45453	4.19148	0.509357	3.78214	4.37712	3.91099	0.311259	3.50965	-0.650954	-0.365119	-0.436373	-0.081489	0.343948	0.256133	0.107878	0.318657	0.156209	0.657012	3	slc14a2	nm_001242692
chr1	12696180	12697020	+	64	10	12696651	0.318515	2.04434	2.23515	1.99826	2.32984	0.23743	3.2116	3.53417	3.06799	0.347289	2.62949	2.71842	2.47696	0.380428	2.6891	-0.266751	-0.428375	-0.206893	0.256171	0.39425	0.19017	-0.0323406	0.015647	-0.118552	0.58087	3	aadacl4	nm_001013630
chr13	27135745	27136408	+	73	12	27136054	0.382219	2.43517	4.70978	4.90483	4.87947	0.284916	8.79242	7.84144	8.1669	0.300984	5.94336	7.78667	6.48573	0.415012	6.61229	-0.48949	-0.430947	-0.438424	0.411111	0.245969	0.304638	-0.15387	0.235856	-0.0278817	0.773527	3	wasf3	nm_006646
chr3	58033439	58034099	+	70	5	58033770	0.254812	2.28485	3.23298	3.26989	3.1211	0.284916	2.79041	3.75506	3.67294	0.370441	4.0703	4.51535	2.93324	0.345844	3.48459	-0.108121	-0.0917467	-0.158931	-0.320511	0.107848	0.075949	0.224149	0.373849	-0.248491	0.0740281	3	flnb	nm_001457
chr12	106517164	106517819	+	50	7	106517522	0.286664	1.80383	4.35056	4.35985	3.29694	0.498603	7.00235	5.96392	7.21625	0.439899	6.69979	6.86517	6.25759	0.311259	5.77916	-0.409658	-0.406581	-0.809731	0.27698	0.0454007	0.320391	0.213257	0.248436	0.114747	0.756247	3	nuak1	nm_014840
chr3	99224703	99225174	+	32	4	99224980	0.0955546	1.02217	4.07117	4.26902	4.00029	0.261173	4.26459	3.82869	4.88285	0.162068	4.61061	5.62114	4.59541	0.380428	4.46042	-0.131737	-0.0632746	-0.157075	-0.0647728	-0.22033	0.130545	0.0477783	0.333685	0.0430157	0.0658432	3	col8a1	nm_001850
chrx	108595108	108595825	+	60	5	108595560	0.159258	1.83389	0.638614	0.136245	0.483551	0.142458	0.210597	0.368143	0.475322	0.138915	0.612347	0.552899	0.260733	0.103753	0.415384	0.620501	-1.60824	0.219225	-0.979959	-0.174178	0.194461	0.559905	0.412573	-0.671872	-0.0637215	3	gucy2f	nm_001522
chr16	48109243	48109764	+	43	6	48109492	0.254812	1.53326	2.91368	3.54238	2.63755	0.427374	3.15895	3.46054	3.24083	0.532509	3.56602	4.37712	3.68285	0.345844	3.39777	-0.221747	0.06013	-0.365388	-0.105141	0.0264106	-0.0682238	0.0697261	0.365394	0.116234	0.126684	3	abcc12	nm_033226
chr20	39636992	39637351	+	31	4	39637190	0.159258	1.11236	2.15532	2.54325	2.3738	0.284916	2.31657	2.50337	3.06799	0.300984	3.02571	3.04095	2.44437	0.380428	2.60792	-0.274998	-0.0362314	-0.135705	-0.170914	-0.0590296	0.234391	0.214373	0.221619	-0.0934399	0.15046	3	top1	nm_003286
chr1	235132917	235133523	+	56	8	235133247	0.222961	1.86396	5.94709	6.44894	4.61572	0.166201	9.74011	8.57773	7.56194	0.370441	7.02398	7.74059	8.40863	0.276675	7.34053	-0.303698	-0.186821	-0.669328	0.408054	0.224712	0.0428732	-0.0635956	0.0765605	0.195987	0.611829	3	snora14b	nr_002956
chr3	157077699	157078299	+	70	6	157077986	0.286664	2.28485	4.78961	4.26902	2.81339	0.142458	6.05466	6.36887	5.53102	0.231526	5.90734	6.91124	6.1924	0.242091	5.4264	-0.180087	-0.34609	-0.947685	0.158052	0.231044	0.0275514	0.122515	0.348951	0.190505	0.63017	3	ptx3	nm_002852
chr7	147109820	147110120	+	36	6	147110074	0.350367	2.01428	8.18224	7.26642	5.7147	0.142458	8.47653	8.13596	8.98791	0.208373	8.64489	9.30714	9.12565	0.207506	8.2046	-0.00393698	-0.17519	-0.521756	0.0470397	-0.0121213	0.131552	0.0754145	0.181904	0.153493	0.289118	3	mir548f4	nr_031645
chr16	70611079	70611631	+	41	3	70611394	0.254812	1.44306	2.35489	2.81574	2.68151	0.332402	4.94903	4.74904	4.36432	0.347289	4.17836	5.52899	3.74803	0.311259	3.92999	-0.738867	-0.481014	-0.551479	0.332619	0.273111	0.151231	0.0884123	0.492491	-0.0683926	0.842774	3	il34	nm_001172771
chr9	35511029	35511526	+	60	10	35511282	0.350367	2.1646	6.18657	6.67602	5.7147	0.166201	7.26559	7.03153	8.68543	0.347289	8.35673	8.47779	7.69162	0.242091	7.34289	-0.247206	-0.137359	-0.36167	-0.0152665	-0.0625089	0.24225	0.186591	0.207341	0.0669392	0.30357	3	rusc2	nr_052015
chr17	27972434	27973026	+	46	6	27972881	0.350367	1.68358	4.4703	4.17819	4.65968	0.189944	7.31824	7.43649	7.51873	0.300984	4.75469	5.71329	4.39986	0.207506	5.6055	-0.326471	-0.423965	-0.266612	0.384655	0.407779	0.423647	-0.237491	0.0274805	-0.349383	0.744376	3	coro6	nm_032854
chr6	16929869	16930511	+	98	5	16930145	0.159258	3.06651	0.558787	0.408736	0.395633	0.166201	0.579142	0.368143	0.475322	0.370441	0.792449	0.645049	0.81479	0.380428	0.559783	-0.00256913	-0.4537	-0.500706	0.0490475	-0.604603	-0.235963	0.501449	0.204541	0.541559	0.0551521	3	atxn1	nm_000332
chr2	43062815	43063609	+	44	5	43063184	0.286664	1.32281	3.75186	2.90657	2.46172	0.546089	3.6328	3.64461	3.45689	0.393594	3.49398	4.10067	3.8784	0.311259	3.48083	0.108173	-0.260116	-0.499768	0.0616487	0.0663341	-0.00995857	0.00543816	0.236428	0.156029	0.256578	3	haao	nm_012205
chr9	89598291	89599353	+	115	11	89598770	0.41407	3.39721	5.26857	4.31443	4.22009	0.284916	6.47586	6.47932	6.13598	0.231526	5.43908	6.08189	5.67094	0.449597	5.56513	-0.079004	-0.367243	-0.399142	0.218656	0.219427	0.140878	-0.0330523	0.128106	0.0271725	0.474784	3	rp11-276h19,1	nr_049794
chr10	104536576	104537257	+	108	4	104536920	0.286664	3.42728	6.62562	7.58432	6.11033	0.356145	10.4772	11.4861	10.5867	0.370441	10.0497	12.4863	9.61452	0.380428	9.44675	-0.511762	-0.316798	-0.628568	0.149363	0.281994	0.164365	0.0892604	0.402457	0.0253963	0.684283	3	wbp1l	nm_017787
chr14	52836045	52836675	+	65	6	52836399	0.477773	2.19466	3.15316	3.76945	3.51674	0.284916	6.05466	5.55896	6.09276	0.231526	5.54714	5.66722	5.54057	0.311259	4.98896	-0.661943	-0.404385	-0.504502	0.279307	0.156075	0.288357	0.153004	0.183901	0.151295	0.764856	3	ptger2	nm_000956
chr1	225843048	225843601	+	98	14	225843264	0.254812	3.39721	7.4638	6.76685	5.67074	0.284916	5.73877	6.4425	7.64836	0.162068	8.32071	8.89247	8.60418	0.276675	7.28315	0.0353478	-0.106079	-0.361026	-0.343822	-0.176942	0.0705879	0.192143	0.28802	0.240474	-0.00613982	3	enah	nm_001008493
chr2	62241178	62241651	+	38	3	62241496	0.318515	1.38294	1.23731	1.18079	1.36274	0.142458	1.47418	1.17806	1.72844	0.185221	1.72898	1.52047	1.62958	0.242091	1.44895	-0.227795	-0.295253	-0.0885024	0.024903	-0.298599	0.254465	0.254912	0.0695124	0.169491	0.19744	3	commd1	nm_152516
chr5	67342975	67343278	+	26	1	67343104	0.159258	1.35287	4.15099	4.13277	4.26404	0.332402	6.52851	4.74904	5.57423	0.208373	3.99826	5.66722	4.04136	0.518765	4.7896	-0.20645	-0.212796	-0.167684	0.446847	-0.0122692	0.218867	-0.260533	0.242735	-0.245066	0.413458	3	loc102467655	nr_105003
chr12	125249407	125250037	+	66	11	125249812	0.477773	2.1646	2.15532	2.63408	2.02212	0.403631	2.94836	3.46054	3.71615	0.370441	2.84561	2.67235	3.06361	0.345844	2.83535	-0.395623	-0.10623	-0.487655	0.0563848	0.287472	0.390284	0.00521173	-0.085419	0.111706	0.574549	3	scarb1	nm_005505
chr3	186557554	186558148	+	43	6	186557825	0.286664	1.413	2.43472	2.58866	2.72547	0.213687	4.42254	5.04356	4.06184	0.115763	2.52143	3.63992	2.77029	0.415012	3.35649	-0.4632	-0.374748	-0.300448	0.39792	0.587488	0.275181	-0.412713	0.116954	-0.276919	0.799661	3	adipoq	nm_004797
chr2	37816983	37817869	+	94	8	37817416	0.286664	2.91619	4.03125	4.17819	4.00029	0.332402	5.05433	5.00674	5.87671	0.208373	5.15092	5.80544	7.07237	0.242091	5.13069	-0.347926	-0.296276	-0.35905	-0.021635	-0.0352813	0.195854	0.00567494	0.178253	0.463041	0.38073	3	cdc42ep3	nm_006449
chr9	35936178	35936533	+	29	3	35936225	0.159258	1.17249	8.82086	9.08302	7.6489	0.284916	9.58216	9.35083	9.80892	0.162068	9.97765	10.6894	11.7656	0.172922	9.63637	-0.12757	-0.0853172	-0.333236	-0.00813811	-0.0433947	0.0256049	0.0502105	0.149618	0.288009	0.173398	3	or2s2	nm_019897
chr8	86847751	86848562	+	56	6	86848312	0.41407	1.68358	1.63645	1.72577	1.05502	0.332402	2.57981	1.76709	2.07413	0.393594	1.765	1.56655	1.75995	0.138337	1.76997	-0.11316	-0.0364851	-0.746456	0.543538	-0.00235614	0.22878	-0.004061	-0.176139	-0.00819732	0.555354	3	rexo1l2p	nr_003594
chr2	232504944	232505381	+	27	1	232505326	0.159258	0.992107	1.87593	1.77119	1.80233	0.71229	2.84306	3.01877	2.50624	0.601967	2.55745	2.11945	1.89031	0.415012	2.26497	-0.271886	-0.354774	-0.32963	0.327952	0.41447	0.146035	0.175213	-0.0958032	-0.260867	0.614916	3	c2orf57	nm_152614
chr19	8420294	8421066	+	181	9	8420705	0.254812	5.53175	2.35489	2.58866	2.46172	0.641061	3.5275	3.01877	4.36432	0.393594	4.32245	4.33105	3.74803	0.55335	3.41304	-0.535399	-0.398853	-0.471394	0.0475872	-0.177097	0.354699	0.34079	0.343657	0.135075	0.543611	3	angptl4	nm_139314
chr15	39186371	39187101	+	64	10	39186538	0.41407	2.10447	8.22216	6.72143	5.53886	0.047486	9.52951	9.5349	9.54965	0.254678	9.29326	8.98462	9.90784	0.207506	8.58692	-0.0626229	-0.353371	-0.63255	0.150262	0.151078	0.153308	0.114045	0.0653169	0.206431	0.501064	3	c15orf53	nm_207444
chr6	53918939	53919376	+	54	9	53919092	0.350367	2.13453	3.5922	2.86115	2.85735	0.23743	5.15963	4.6386	5.61744	0.208373	4.17836	5.29862	5.37761	0.311259	4.39789	-0.29194	-0.620214	-0.622133	0.230456	0.0768796	0.353103	-0.0738716	0.268807	0.290156	0.731576	3	mlip	nm_001281746
chr15	26128856	26129486	+	108	12	26129155	0.41407	3.63773	6.82519	5.31357	6.02241	0.308659	6.89705	6.40569	6.43845	0.347289	9.04112	11.1501	10.0056	0.242091	7.56658	-0.148773	-0.509961	-0.3293	-0.133662	-0.240288	-0.232928	0.256859	0.559348	0.403097	0.127052	3	rp11-1084i9,1	nr_040082
chr18	42904304	42905091	+	90	9	42904792	0.318515	2.76587	4.86943	4.95025	4.17613	0.284916	5.94936	5.77984	6.48166	0.416746	5.25898	6.22012	4.85615	0.276675	5.39355	-0.14748	-0.123734	-0.369069	0.141501	0.0997963	0.26513	-0.0364521	0.205708	-0.151422	0.382237	3	slc14a2	nm_001242692
chr12	117032813	117033522	+	67	9	117033214	0.445922	2.25479	1.75619	1.77119	1.27482	0.332402	3.36955	2.61381	2.7223	0.416746	2.08918	1.88907	1.75995	0.380428	2.13845	-0.284118	-0.271848	-0.746276	0.65599	0.289591	0.348259	-0.0336278	-0.178888	-0.281035	0.865361	3	map1lc3b2	nm_001085481
chr15	91223441	91224076	+	51	8	91223894	0.222961	1.77377	5.18874	4.85942	4.39592	0.379888	7.10765	6.62657	5.74708	0.277831	4.57459	5.94367	5.08429	0.345844	5.5031	-0.0848608	-0.179462	-0.324079	0.369127	0.268018	0.0625829	-0.266603	0.111109	-0.114199	0.429377	3	blm	nm_001287246
chr16	85026212	85026611	+	22	1	85026406	0.159258	0.721532	5.34839	5.81313	5.7147	0.688547	6.58115	6.92109	7.30267	0.393594	7.06	7.04947	6.87683	0.311259	6.5186	-0.285457	-0.165247	-0.189885	0.0137778	0.0864357	0.163862	0.115104	0.112952	0.0771798	0.301555	3	zdhhc7	nm_001145548
chr7	94249972	94250434	+	33	2	94250194	0.286664	1.20255	0.838181	0.726642	1.09898	0.356145	0.737089	0.7731	1.08028	0.416746	1.54888	1.1058	1.27107	0.484181	1.02	-0.283238	-0.489256	0.107594	-0.468661	-0.399845	0.0828298	0.60265	0.116517	0.317474	-0.0402584	3	sgce	nm_003919
chr7	43012290	43013439	+	144	19	43012900	0.668883	4.26907	2.19524	2.17992	2.68151	0.213687	2.84306	2.76107	3.41368	0.324136	2.98969	2.48805	3.06361	0.380428	2.73509	-0.317213	-0.327311	-0.0285425	0.0558545	0.013639	0.319737	0.128407	-0.136575	0.163643	0.354099	3	mrpl32	nm_031903
chr8	121797947	121798413	+	36	3	121798196	0.318515	1.35287	2.11541	1.86202	2.154	0.783519	2.52716	3.20284	2.3334	0.439899	3.09775	3.40955	2.77029	0.484181	2.60805	-0.302033	-0.486102	-0.27595	-0.0454508	0.296383	-0.160537	0.248253	0.38661	0.0870647	0.384827	3	sntb1	nm_021021
chr3	134076700	134077219	+	44	6	134076930	0.254812	1.56332	8.18224	9.31009	8.48413	0.356145	12.5832	10.9707	11.667	0.463052	9.29326	10.0904	9.84266	0.415012	10.0471	-0.296206	-0.109907	-0.243936	0.32472	0.126875	0.215658	-0.112518	0.00621078	-0.0296546	0.439101	3	mir6827	nr_106885
chr7	90208375	90208851	+	37	6	90208577	0.318515	1.29275	2.59437	1.90743	2.50568	0.261173	4.15929	3.42373	3.71615	0.393594	4.28643	5.34469	4.20432	0.103753	3.57134	-0.461082	-0.904834	-0.511267	0.21987	-0.0608982	0.0573435	0.263309	0.581641	0.235404	0.697833	3	cdk14	nm_001287135
chr16	73023629	73024415	+	52	5	73024144	0.350367	1.65351	7.7432	7.40266	6.63784	0.427374	11.0037	11.1547	9.7225	0.277831	9.43734	10.1826	8.47381	0.103753	9.08426	-0.23044	-0.295325	-0.452655	0.276547	0.296215	0.0979578	0.0550116	0.16466	-0.100358	0.549713	3	zfhx3	nm_006885
chr2	242101315	242101826	+	45	7	242101340	0.286664	1.68358	1.7961	1.36245	1.4067	0.403631	1.89537	1.91434	1.85808	0.601967	2.01714	2.3959	2.37919	0.172922	1.8917	-0.074811	-0.473474	-0.427371	0.00280077	0.0171688	-0.0258703	0.0926318	0.340886	0.330787	0.323252	3	pask	nm_001252120
chr4	77055114	77055685	+	52	6	77055401	0.382219	1.7437	0.399134	0.272491	0.483551	0.166201	0.579142	0.404957	0.561744	0.277831	0.396224	0.829349	0.521465	0.345844	0.494229	-0.308306	-0.858972	-0.0315093	0.228737	-0.287409	0.184735	-0.318861	0.746801	0.077393	0.441617	3	nup54	nm_001278603
chr6	160321357	160321876	+	49	8	160321657	0.350367	1.65351	4.39047	4.814	4.92343	0.332402	6.21261	6.73702	7.82121	0.416746	6.95193	8.01704	7.7568	0.207506	6.40272	-0.54431	-0.41145	-0.379021	-0.0434863	0.0734238	0.288706	0.118729	0.324384	0.276776	0.551141	3	mas1	nm_002377
chr3	113549265	113549872	+	57	6	113549559	0.254812	1.7437	1.15749	0.953717	1.23086	0.332402	1.84272	1.47257	1.64202	0.347289	1.44082	1.88907	2.21623	0.207506	1.53839	-0.410422	-0.689787	-0.321755	0.26042	-0.0630821	0.0940532	-0.0945343	0.296259	0.526686	0.571118	3	gramd1c	nm_017577
chr2	135019165	135019762	+	48	3	135019506	0.222961	1.53326	2.3948	3.76945	2.76943	0.403631	4.73843	4.16001	4.92606	0.324136	4.68265	5.34469	4.72578	0.380428	4.16792	-0.799422	-0.144974	-0.58974	0.18508	-0.00274057	0.241106	0.167996	0.358778	0.181223	0.652527	3	mgat5	nm_002410
chr6	166970273	166970783	+	36	6	166970620	0.254812	1.413	3.79177	3.9057	3.95633	0.498603	3.68545	4.85949	4.19148	0.416746	5.79928	5.66722	4.98651	0.311259	4.53814	-0.259228	-0.216519	-0.197937	-0.30026	0.098704	-0.114641	0.353775	0.320541	0.135932	0.119162	3	mir1913	nr_031734
chr13	24364699	24365476	+	128	13	24365050	0.541476	3.99849	1.95576	2.95198	2.154	0.593575	2.89571	3.6078	3.15441	0.393594	2.73755	3.3174	2.50955	0.345844	2.80935	-0.52251	0.0714469	-0.383217	0.0436794	0.360883	0.167133	-0.0373517	0.239815	-0.162807	0.468659	3	c1qtnf9b-as1	nm_001014442
chr13	29327504	29328082	+	65	4	29327811	0.222961	1.95415	6.58571	6.22187	6.19825	0.451117	7.055	6.62657	6.65451	0.532509	7.85244	7.51022	7.46347	0.484181	6.90756	-0.0688375	-0.150828	-0.156315	0.0304694	-0.0599134	-0.0538442	0.184966	0.120678	0.111671	0.0975643	3	slc46a3	nm_001135919
chr1	55400462	55400881	+	28	3	55400661	0.222961	0.931979	5.42822	5.4044	6.06637	0.356145	5.89671	7.10516	6.52487	0.416746	6.77183	7.78667	7.13756	0.380428	6.45798	-0.250603	-0.256949	-0.0902483	-0.131171	0.137784	0.0148679	0.068464	0.269924	0.144348	0.206427	3	tmem61	nm_182532
chr14	95131388	95131920	+	45	6	95131722	0.318515	1.53326	1.55662	2.08909	2.3738	0.166201	3.79074	2.68744	2.7223	0.300984	3.24183	2.90272	2.67251	0.207506	2.67079	-0.778845	-0.354386	-0.170067	0.505217	0.0089702	0.0275614	0.279547	0.120142	0.000931465	0.615016	3	serpina13p	nr_015340
chr8	37548904	37549208	+	26	4	37549010	0.222961	1.05223	1.27723	0.953717	1.45065	0.427374	1.73742	1.73027	2.16055	0.463052	1.69296	1.88907	1.62958	0.518765	1.6135	-0.337173	-0.758557	-0.153486	0.106761	0.100809	0.421212	0.0693566	0.227489	0.01431	0.625999	3	znf703	nm_025069
chr4	41144871	41145576	+	56	4	41145202	0.222961	1.86396	7.22432	8.35638	5.89054	0.332402	9.68746	10.897	11.2781	0.277831	9.3653	9.30714	8.96269	0.0691687	8.99655	-0.316509	-0.106494	-0.610973	0.106746	0.276491	0.32608	0.0579535	0.0489662	-0.00544051	0.581098	3	apbb2	nm_001166050
chr7	123366996	123367598	+	44	2	123367294	0.318515	1.35287	1.63645	1.08996	1.84629	0.379888	1.84272	1.5462	2.20377	0.578815	1.765	2.25767	1.43403	0.345844	1.73579	-0.085022	-0.671312	0.0890365	0.0862489	-0.166863	0.34438	0.0240768	0.379246	-0.275515	0.310355	3	wasl	nm_003941
chr9	130345927	130346246	+	26	4	130346032	0.222961	1.20255	4.07117	4.76859	3.91237	0.332402	6.10731	5.74303	6.56809	0.370441	4.21439	5.20647	5.50798	0.276675	5.12215	-0.331309	-0.103189	-0.388707	0.253787	0.165061	0.358723	-0.281428	0.023555	0.104772	0.533592	3	fam129b	nm_001035534
chr12	120637498	120638037	+	55	7	120637802	0.127406	1.7437	2.79394	2.67949	2.3738	0.23743	3.68545	3.68143	3.02478	0.254678	2.95367	3.27132	2.93324	0.415012	3.04412	-0.123728	-0.184068	-0.35883	0.275812	0.274239	-0.0091985	-0.0435175	0.103847	-0.0535304	0.402493	3	rplp0	nm_053275
chr15	99421258	99421751	+	41	6	99421504	0.286664	1.35287	5.70761	6.08562	5.84658	0.498603	7.21295	6.81064	5.74708	0.555662	8.78897	8.84639	8.37604	0.172922	7.04688	-0.304096	-0.211579	-0.269392	0.0336047	-0.0491926	-0.294156	0.318711	0.328105	0.249284	0.158441	3	mir4714	nr_039864
chr14	69014907	69015332	+	28	1	69015118	0.159258	1.14243	9.97835	11.1267	11.825	0.498603	17.4795	17.1186	15.5992	0.324136	14.5162	13.8225	14.5358	0.138337	14.0002	-0.488577	-0.331424	-0.243606	0.320218	0.290119	0.156022	0.0522154	-0.0184328	0.0541653	0.609989	3	zfp36l1	nm_004926
chr6	34358656	34359235	+	62	6	34359006	0.445922	1.95415	3.5922	3.49696	3.29694	0.379888	4.89638	3.97594	4.23469	0.439899	3.56602	4.0546	4.04136	0.449597	3.90612	-0.120867	-0.159634	-0.244608	0.325979	0.0255606	0.116519	-0.131423	0.0538215	0.0491032	0.331056	3	nudt3	nm_006703
chr4	186659038	186659701	+	48	8	186659434	0.286664	1.65351	3.75186	4.85942	3.95633	0.284916	5.89671	6.25843	5.91992	0.439899	4.39449	4.6075	5.11688	0.622518	4.9735	-0.406657	-0.0334797	-0.3301	0.245649	0.331538	0.251315	-0.178568	-0.11028	0.0410019	0.532913	3	sorbs2	nm_001145673
chr1	234752983	234753427	+	36	6	234753258	0.286664	1.44306	6.5458	6.67602	5.36302	0.356145	8.26593	7.51012	8.33974	0.324136	7.45622	7.55629	7.52866	0.311259	7.24909	-0.147231	-0.118811	-0.434753	0.189378	0.0510355	0.202203	0.0406449	0.059879	0.054593	0.381137	3	irf2bp2	nm_182972
chr3	124531445	124532001	+	52	8	124531732	0.286664	1.92409	6.30632	4.95025	5.93449	0.284916	8.05533	7.36286	7.95084	0.416746	5.97938	6.86517	5.67094	0.380428	6.56395	-0.0577677	-0.407065	-0.14544	0.295379	0.165701	0.276543	-0.134568	0.0647302	-0.210978	0.449298	3	itgb5	nm_002213
chr2	240143825	240144327	+	31	5	240144176	0.254812	1.14243	5.70761	6.26728	5.7147	0.308659	9.26627	9.12994	8.68543	0.509357	7.20408	7.51022	7.10497	0.276675	7.39894	-0.374432	-0.239479	-0.372642	0.324669	0.303287	0.231278	-0.0385057	0.0215353	-0.0584915	0.615262	3	mgc16025	nr_026664
chr9	16642597	16643021	+	31	4	16642797	0.222961	1.11236	1.59654	1.63494	1.49461	0.308659	2.21127	1.43576	1.9445	0.347289	2.23326	2.0273	2.08586	0.415012	1.85156	-0.213797	-0.179501	-0.308969	0.256132	-0.366929	0.0706573	0.270412	0.130817	0.171902	0.220709	3	bnc2	nm_017637
chr7	112635101	112635882	+	43	7	112635458	0.350367	1.413	6.8651	7.221	6.98952	0.332402	8.63447	8.17277	8.81506	0.324136	8.60887	10.5051	9.64711	0.207506	8.38433	-0.288415	-0.215497	-0.262504	0.0424123	-0.0368705	0.0722748	0.0381282	0.32532	0.202401	0.281411	3	ac018464,3	nr_110162
chr15	26076085	26076818	+	78	12	26076431	0.477773	2.43517	5.50805	6.85768	6.46201	0.308659	6.8444	6.7002	7.12983	0.300984	7.27612	8.84639	6.64868	0.172922	6.91926	-0.329077	-0.0128977	-0.0986362	-0.015694	-0.0464138	0.0432496	0.0725508	0.354471	-0.0575493	0.140584	3	mir4715	nr_039865
chr12	58960397	58960911	+	40	4	58960652	0.159258	1.413	2.55446	3.22447	2.41776	0.308659	3.7381	3.57099	3.37047	0.439899	4.79071	5.20647	4.23691	0.172922	3.67892	-0.526268	-0.190221	-0.605615	0.0230194	-0.0429615	-0.126336	0.380956	0.501021	0.203727	0.391942	3	lrig3	nm_001136051
chr2	228682856	228683901	+	143	21	228683232	0.350367	4.26907	2.91368	3.36072	3.64862	0.189944	6.37056	5.11719	5.96313	0.115763	5.36704	6.63479	5.4428	0.103753	4.97983	-0.773257	-0.567329	-0.448749	0.355322	0.039253	0.259972	0.108028	0.413954	0.12825	0.814627	3	ccl20	nm_004591
chr2	47194994	47195527	+	36	5	47195280	0.127406	1.71364	6.46597	7.53891	7.29723	0.47486	8.05533	9.24039	9.37681	0.439899	7.74438	8.66209	7.85457	0.276675	8.02619	-0.311848	-0.0903595	-0.137366	0.00522952	0.203239	0.224382	-0.0515644	0.110001	-0.0311818	0.324141	3	mcfd2	nm_001171508
chr2	38029979	38030876	+	197	12	38030450	0.350367	5.92258	8.0625	9.35551	7.51703	0.23743	8.79242	8.90906	9.3336	0.324136	10.8782	12.2099	10.7878	0.207506	9.53844	-0.242525	-0.027937	-0.343591	-0.117493	-0.0984803	-0.0313202	0.189609	0.356222	0.177578	0.122253	3	linc00211	nr_110011
chr4	154598206	154598526	+	43	6	154598384	0.159258	1.44306	0.399134	0.408736	0.527511	0.403631	0.473843	0.662657	0.345689	0.578815	0.756428	0.598974	0.684423	0.345844	0.539711	-0.435313	-0.401017	-0.0329858	-0.187777	0.296077	-0.642712	0.487017	0.150308	0.342703	0.111635	3	tlr2	nm_003264
chr2	188391964	188392363	+	27	3	188392160	0.254812	1.11236	2.15532	1.95285	2.28588	0.308659	2.42186	2.3193	2.50624	0.300984	2.77357	2.07337	2.41178	0.518765	2.32224	-0.107614	-0.249938	-0.0227692	0.0605999	-0.00182885	0.110008	0.256226	-0.163539	0.0545784	0.183034	3	tfpi	nm_006287
chr3	139020987	139021531	+	54	8	139021301	0.382219	1.77377	4.23082	5.13191	4.26404	0.451117	6.00201	5.85347	7.17304	0.439899	5.61918	5.16039	4.72578	0.449597	5.35118	-0.338921	-0.0603633	-0.327636	0.165588	0.129435	0.422727	0.0705017	-0.0523765	-0.179305	0.481557	3	mrps22	nm_020191
chr14	95485042	95485722	+	66	9	95485454	0.41407	2.04434	1.31714	1.58953	1.62649	0.332402	2.26392	1.65664	2.46303	0.370441	1.90908	1.88907	1.59699	0.207506	1.81243	-0.460517	-0.189329	-0.156165	0.320894	-0.129665	0.442508	0.0749504	0.0597511	-0.182574	0.479916	3	dicer1	nm_001195573
chr5	32810804	32811519	+	80	7	32811146	0.541476	2.52536	6.74536	7.40266	6.63784	0.451117	10.3719	8.83543	9.89534	0.277831	7.67234	8.29349	9.45156	0.380428	8.36733	-0.310871	-0.176723	-0.334052	0.309842	0.0785337	0.241983	-0.125099	-0.0127869	0.175786	0.484001	3	npr3	nm_000908
chr3	127487456	127487776	+	36	5	127487504	0.127406	1.47313	5.90718	6.81226	6.33013	0.23743	9.31891	8.94587	9.85213	0.393594	10.0857	10.5051	9.61452	0.242091	8.59687	-0.541341	-0.335677	-0.441576	0.116351	0.0574112	0.196624	0.230429	0.289206	0.161404	0.562994	3	mgll	nm_001256585
chr11	70998017	70998720	+	88	10	70998330	0.191109	2.79594	2.0755	2.08909	1.4067	0.261173	2.89571	3.3501	2.98157	0.300984	2.80959	3.5017	3.03102	0.103753	2.68233	-0.37003	-0.360609	-0.931177	0.11043	0.320718	0.152584	0.0668733	0.384568	0.176316	0.748516	3	shank2	nm_012309
chr2	42345226	42345759	+	48	7	42345482	0.286664	1.62345	3.15316	3.22447	2.06608	0.166201	3.3169	2.94514	3.84579	0.231526	3.3499	3.3174	4.17172	0.380428	3.26562	-0.0505588	-0.0182931	-0.660458	0.0224803	-0.149018	0.235923	0.0367603	0.0226956	0.353288	0.279565	3	eml4	nm_019063
chr17	54218445	54219232	+	55	8	54218834	0.41407	1.83389	2.51454	2.95198	2.90131	0.403631	4.79108	4.16001	4.58038	0.416746	3.53	4.56142	4.59541	0.172922	3.8429	-0.611901	-0.380513	-0.405493	0.318154	0.114392	0.253269	-0.12253	0.247286	0.257998	0.694574	3	ankfn1	nm_153228
chr8	48425939	48426441	+	39	5	48426192	0.191109	1.413	7.66337	7.31183	6.02241	0.261173	11.5302	10.2344	10.3707	0.300984	8.53683	8.56994	8.01753	0.103753	8.69524	-0.182246	-0.249993	-0.529884	0.407118	0.235125	0.254211	-0.0265247	-0.02094	-0.117067	0.619526	3	cebpd	nm_005195
chr11	86458167	86458689	+	68	5	86458490	0.350367	2.19466	7.70328	8.35638	6.76972	0.189944	8.16063	7.76782	7.69157	0.555662	11.4545	11.657	11.0485	0.276675	8.9566	-0.217478	-0.100073	-0.403855	-0.13427	-0.205442	-0.219672	0.354889	0.380169	0.302834	0.0540071	3	prss23	nm_007173
chr6	122013144	122013677	+	37	2	122013404	0.222961	1.20255	1.67636	1.4987	1.09898	0.284916	2.52716	2.17204	2.46303	0.324136	1.87306	2.34982	2.86806	0.311259	2.05858	-0.296316	-0.45794	-0.905484	0.295869	0.0774031	0.258786	-0.136252	0.190902	0.478425	0.763933	3	gja1	nm_000165
chr8	38858602	38859104	+	36	5	38858893	0.254812	1.0823	4.23082	5.08649	4.04425	0.23743	6.8444	5.89029	6.13598	0.370441	6.44765	5.06825	6.22499	0.138337	5.55257	-0.392218	-0.126484	-0.457283	0.301769	0.0851828	0.144138	0.215618	-0.131669	0.164917	0.502358	3	adam9	nm_003816
chr3	101849104	101849506	+	26	4	101849347	0.191109	0.811724	3.19307	3.22447	2.94527	0.498603	4.15929	4.49134	4.58038	0.324136	4.50255	4.33105	4.72578	0.311259	4.01702	-0.331182	-0.317063	-0.447727	0.0502109	0.161021	0.18934	0.164616	0.108589	0.234426	0.498848	3	loc152225	nr_026934
chr9	112878715	112879167	+	31	2	112878947	0.0955546	1.02217	1.27723	1.45328	1.09898	0.356145	2.26392	2.09841	1.77165	0.439899	1.98112	2.48805	2.21623	0.276675	1.84988	-0.534411	-0.348112	-0.751262	0.291393	0.181872	-0.0623303	0.0988894	0.427586	0.260679	0.681573	3	akap2	nm_001136562
chr12	92472052	92472551	+	50	7	92472276	0.286664	1.98421	4.98917	5.63147	4.35196	0.284916	6.6338	5.52214	6.87056	0.208373	5.69122	5.62114	6.12722	0.380428	5.71541	-0.196057	-0.0213453	-0.393191	0.214979	-0.049629	0.265571	-0.00611913	-0.0239935	0.100375	0.347171	3	c12orf79	nr_046159
chr1	94791101	94791747	+	57	7	94791538	0.0955546	1.89402	3.23298	3.3153	3.5607	0.189944	3.89604	3.53417	3.97542	0.277831	3.8902	4.28497	3.51989	0.207506	3.68996	-0.190741	-0.154467	-0.0514474	0.0784027	-0.0622348	0.1075	0.0762379	0.215678	-0.068076	0.173441	3	arhgap29	nm_004815
chr11	34287966	34288369	+	27	3	34288109	0.222961	0.992107	1.11757	1.86202	1.45065	0.546089	1.57948	1.76709	1.38275	0.277831	1.4048	2.16552	1.9555	0.311259	1.63171	-0.546012	0.190484	-0.16968	-0.0469366	0.114989	-0.238838	-0.216024	0.408332	0.26115	0.118141	3	abtb2	nm_145804
chr12	46782921	46783494	+	74	9	46783172	0.445922	2.46524	7.50372	6.13104	6.50596	0.118715	9.26627	8.57773	10.025	0.208373	7.7804	9.30714	9.09305	0.0345844	8.24337	-0.135628	-0.427102	-0.34147	0.168755	0.0573625	0.282293	-0.0833884	0.175105	0.141531	0.47087	3	slc38a2	nm_018976
chr12	113342243	113342900	+	122	6	113342561	0.191109	3.69785	2.11541	1.22621	1.84629	0.379888	2.31657	1.73027	1.51239	0.254678	2.37735	3.1331	1.75995	0.242091	2.00195	0.0795335	-0.7072	-0.116776	0.210585	-0.210405	-0.404575	0.247948	0.646186	-0.185872	0.113349	3	oas1	nm_002534
chr5	106900464	106901078	+	42	5	106900808	0.159258	1.44306	0.997835	1.13538	1.36274	0.213687	1.36888	1.14124	1.85808	0.370441	1.5849	0.829349	1.5318	0.242091	1.31224	-0.395164	-0.208864	0.0544696	0.0609598	-0.20143	0.501774	0.272353	-0.661985	0.223196	0.303621	3	efna5	nm_001962
chr4	15416184	15416794	+	45	6	15416548	0.127406	1.47313	2.27506	2.04368	1.58253	0.094972	2.73776	3.42373	3.58652	0.277831	2.84561	2.53412	2.44437	0.311259	2.60815	-0.197123	-0.35186	-0.720794	0.069967	0.392539	0.459556	0.125709	-0.0415428	-0.0935669	0.730613	3	c1qtnf7	nm_031911
chr20	17543256	17543840	+	41	6	17543522	0.159258	1.23262	4.59004	4.76859	3.86841	0.23743	7.73944	7.62056	6.91377	0.115763	7.27612	6.54264	8.11531	0.172922	6.38165	-0.475424	-0.420369	-0.722189	0.278299	0.255967	0.115544	0.189239	0.0359436	0.346715	0.75593	3	bfsp1	nm_001278607
chr13	102102693	102103223	+	32	5	102102984	0.254812	1.32281	4.98917	4.13277	4.48384	0.261173	6.52851	7.2156	6.69772	0.185221	5.94336	6.54264	5.76871	0.276675	5.81137	-0.220078	-0.491768	-0.374143	0.167874	0.312241	0.204792	0.0324014	0.170995	-0.0106293	0.590299	3	itgbl1	nm_001271755
chr12	78241870	78242326	+	33	1	78242056	0.286664	1.23262	2.79394	3.9057	2.68151	0.261173	2.89571	3.3501	3.80258	0.231526	4.21439	4.37712	4.82356	0.55335	3.6494	-0.385359	0.0979215	-0.444612	-0.333743	-0.123455	0.0593181	0.207663	0.262323	0.402438	0.11139	3	nav3	nm_014903
chr2	19172210	19173236	+	102	14	19172520	0.445922	3.06651	4.59004	4.90483	4.61572	0.261173	5.84407	5.11719	5.01249	0.0926103	5.54714	6.35834	5.8013	0.207506	5.31012	-0.210239	-0.114542	-0.20219	0.138227	-0.0533947	-0.0832189	0.0629986	0.259906	0.127632	0.176195	3	mir4757	nr_039914
chr9	127594938	127595437	+	30	3	127595239	0.127406	0.901915	1.03775	1.31704	1.27482	0.403631	1.47418	2.39293	1.59881	0.509357	2.16122	2.34982	1.89031	0.415012	1.72188	-0.730525	-0.386684	-0.43369	-0.224069	0.474797	-0.106982	0.327867	0.448571	0.134644	0.564881	3	wdr38	nm_001045476
chr19	14621371	14621763	+	25	4	14621518	0.159258	0.78166	2.63428	2.72491	2.94527	0.356145	3.89604	3.3501	2.7223	0.347289	2.66551	3.686	3.16138	0.380428	3.08731	-0.22894	-0.180144	-0.0679515	0.335659	0.117854	-0.181525	-0.211939	0.255704	0.0342061	0.249675	3	dnajb1	nm_006145
chr6	149353767	149354561	+	53	7	149354130	0.222961	1.77377	6.62562	6.40353	7.60495	0.23743	10.3719	9.2772	9.59286	0.185221	8.93306	9.62967	9.15824	0.345844	8.62189	-0.379948	-0.429137	-0.181066	0.266604	0.105685	0.153957	0.0511495	0.159481	0.0870656	0.505466	3	rp11-162j8,2	nr_038408
chr14	86762554	86762926	+	50	7	86762743	0.318515	1.62345	0.758354	1.31704	1.36274	0.308659	1.31623	1.8039	1.5556	0.324136	1.80102	2.3959	1.75995	0.242091	1.56341	-1.04376	-0.247403	-0.198193	-0.248287	0.20642	-0.00722885	0.204114	0.615867	0.170832	0.480085	3	loc101928767	nr_110155
chr20	49982439	49983230	+	67	10	49982840	0.41407	2.19466	4.55013	4.08736	4.308	0.308659	5.89671	5.6694	5.8335	0.416746	5.54714	5.16039	5.47539	0.242091	5.16978	-0.184196	-0.338934	-0.263084	0.189808	0.133093	0.174258	0.101641	-0.00262148	0.082858	0.427791	3	mir3194	nr_036162
chr3	105625455	105626111	+	57	7	105625850	0.41407	1.77377	4.39047	4.04194	4.26404	0.213687	6.6338	6.58976	6.17919	0.254678	7.2401	7.18769	7.43088	0.172922	5.99532	-0.449461	-0.568788	-0.491614	0.146	0.136389	0.0435801	0.272172	0.261692	0.309697	0.611944	3	cblb	nm_170662
chr1	41574980	41575415	+	30	3	41575178	0.254812	1.47313	4.15099	3.40613	4.17613	0.379888	4.36989	5.55896	6.2224	0.208373	4.93479	5.71329	5.11688	0.276675	4.84994	-0.224511	-0.509832	-0.215802	-0.150371	0.196848	0.359504	0.0250227	0.236356	0.0772974	0.452042	3	scmh1	nm_001172222
chr3	30552918	30553553	+	51	5	30553148	0.350367	1.62345	5.10891	5.17732	5.01135	0.23743	6.8444	6.84746	6.87056	0.324136	6.59173	8.61602	6.77905	0.276675	6.42742	-0.331224	-0.312035	-0.359041	0.0906838	0.0913281	0.0961881	0.0364169	0.422781	0.0768429	0.426833	3	tgfbr2	nm_001024847
chr2	86151587	86151977	+	31	5	86151814	0.254812	1.14243	0.558787	1.08996	0.395633	0.403631	2.26392	1.95116	1.42597	0.370441	1.98112	1.79692	1.85772	0.518765	1.48013	-1.40535	-0.441448	-1.90349	0.613095	0.398604	-0.0537862	0.420591	0.279803	0.327808	1.5694	2	rp11-548p2,2	nr_110569
chrx	109325260	109325738	+	26	1	109325494	0.222961	1.02217	0.878095	0.908302	0.879184	0.308659	2.63246	3.20284	3.41368	0.115763	2.66551	3.04095	2.60733	0.0691687	2.24759	-1.35593	-1.30714	-1.35414	0.228031	0.510972	0.602945	0.246029	0.436139	0.21419	1.78639	2	mir3978	nr_039774
chr19	6204168	6204649	+	26	0	6204522	0.127406	0.78166	1.23731	0.999132	1.23086	0.332402	3.4222	2.79789	3.54331	0.324136	1.98112	1.6587	2.37919	0.484181	2.13886	-0.789627	-1.09809	-0.797175	0.678085	0.387498	0.728258	-0.110522	-0.366788	0.153629	1.49291	2	acsbg2	nm_030924
chr1	67600887	67601477	+	49	3	67601228	0.350367	1.71364	1.03775	0.726642	0.703348	0.403631	1.68478	1.36213	2.59267	0.370441	1.29673	1.2901	1.98809	0.276675	1.40914	-0.441355	-0.955495	-1.0025	0.257745	-0.0489481	0.879625	-0.119929	-0.12733	0.49657	1.16259	2	c1orf141	nm_001276352
chr14	75130475	75131158	+	57	6	75130906	0.382219	1.7437	1.07766	0.817472	1.31878	0.569832	2.31657	2.02479	2.20377	0.509357	1.54888	1.70477	1.40144	0.518765	1.60157	-0.571581	-0.970245	-0.280285	0.532503	0.338284	0.460485	-0.0482632	0.0900945	-0.192577	1.05113	2	arel1	nm_001039479
chr1	103749524	103750500	+	96	12	103749885	0.573328	2.91619	1.23731	1.04455	1.36274	0.094972	3.36955	3.20284	3.889	0.138915	4.14234	3.5017	4.39986	0.0345844	2.90554	-1.2316	-1.47593	-1.0923	0.213748	0.140545	0.42059	0.511639	0.269246	0.598651	1.5249	2	col11a1	nm_080630
chr10	4325951	4326615	+	47	8	4326319	0.350367	1.65351	4.27073	3.67862	2.85735	0.522346	11.3722	11.2652	11.7534	0.138915	7.96051	10.5512	10.5597	0.380428	8.2521	-0.950277	-1.1656	-1.53008	0.462683	0.449037	0.510248	-0.0519008	0.35457	0.355733	1.68931	2	linc00702	nr_108040
chr21	46378498	46379038	+	44	5	46378722	0.222961	1.50319	2.35489	1.86202	2.02212	0.379888	6.21261	6.11117	6.09276	0.300984	3.63806	4.00852	5.0191	0.415012	4.14681	-0.816341	-1.15513	-1.03613	0.583199	0.559448	0.555096	-0.188832	-0.0489309	0.275429	1.56845	2	fam207a	nm_058190
chr15	58839360	58840051	+	52	5	58839706	0.350367	1.89402	2.91368	2.27075	2.41776	0.379888	5.37022	5.70622	6.13598	0.277831	6.91591	7.46414	7.78939	0.172922	5.22045	-0.841333	-1.201	-1.1105	0.0408076	0.12836	0.233119	0.405746	0.515802	0.577336	1.18504	2	lipc	nm_000236
chr1	171110529	171111847	+	116	17	171110861	0.318515	3.27696	4.27073	5.22274	4.35196	0.261173	9.05567	9.64534	9.67928	0.208373	6.91591	7.41807	7.30052	0.242091	7.09558	-0.732437	-0.442115	-0.705255	0.3519	0.442912	0.44798	-0.0370008	0.0641227	0.0410777	1.04087	2	fmo6p	nr_002601
chr6	73058624	73059037	+	30	3	73058828	0.159258	0.992107	1.07766	0.862887	1.01106	0.284916	1.52683	1.58301	1.46918	0.347289	2.66551	3.36347	3.03102	0.276675	1.8434	-0.774468	-1.09513	-0.8665	-0.271834	-0.219697	-0.327363	0.532039	0.86758	0.717431	0.639067	2	rims1	nm_001168411
chr4	148024449	148025146	+	67	9	148024767	0.191109	2.10447	2.3948	3.17906	2.72547	0.261173	4.73843	5.30126	5.22854	0.370441	5.72724	6.17404	5.8013	0.172922	4.58557	-0.937195	-0.528503	-0.750596	0.0473077	0.209233	0.189307	0.320739	0.429114	0.339275	0.88738	2	ttc29	nm_031956
chr5	40991228	40991912	+	56	4	40991516	0.350367	1.89402	1.99567	2.08909	1.71441	0.189944	4.47519	4.1232	4.23469	0.324136	2.55745	2.48805	2.60733	0.242091	2.92056	-0.549374	-0.483369	-0.768535	0.615701	0.497518	0.536009	-0.191542	-0.231233	-0.163675	1.15017	2	mroh2b	nm_173489
chr20	46196635	46197233	+	66	9	46196921	0.127406	2.01428	1.59654	1.31704	1.58253	0.356145	2.73776	3.05559	2.54945	0.277831	2.48541	3.3174	2.7051	0.276675	2.37187	-0.571079	-0.848727	-0.583789	0.206972	0.365425	0.104165	0.0674583	0.484028	0.189659	0.893386	2	ncoa3	nm_001174088
chr10	77879151	77879700	+	43	5	77879402	0.191109	1.38294	6.46597	6.17645	6.59388	0.403631	10.8457	11.7069	12.8769	0.324136	11.2744	12.8549	12.5804	0.311259	10.1528	-0.650945	-0.717033	-0.622683	0.0952457	0.205481	0.342903	0.151165	0.340437	0.309289	0.878097	2	c10orf11	nm_032024
chr1	110416123	110416914	+	83	12	110416618	0.509625	2.64562	1.67636	1.8166	1.62649	0.569832	3.5275	4.74904	4.06184	0.578815	2.19724	2.7645	2.34659	0.415012	2.7518	-0.71504	-0.59913	-0.758611	0.358271	0.787263	0.56176	-0.324679	0.00664284	-0.229806	1.26003	2	csf1	nm_172212
chr2	43540315	43540912	+	40	4	43540658	0.254812	1.44306	0.558787	0.408736	0.439592	0.427374	2.15862	1.39894	1.98771	0.370441	1.36877	1.1058	1.43403	0.276675	1.20678	-1.11079	-1.56192	-1.45692	0.83895	0.213178	0.719949	0.181726	-0.12607	0.248916	1.96723	2	linc01126	nr_027251
chr7	139432046	139432365	+	31	4	139432256	0.254812	1.11236	2.0755	2.49783	1.97816	0.356145	7.055	6.29524	6.39524	0.463052	6.84387	6.68087	6.1924	0.311259	5.11268	-1.30062	-1.0334	-1.36992	0.464566	0.300183	0.322919	0.420733	0.385956	0.276419	1.5972	2	hipk2	nm_022740
chr7	47691043	47691526	+	54	6	47691286	0.222961	1.68358	1.7961	1.4987	1.62649	0.47486	6.10731	5.81666	6.82735	0.486204	4.71867	5.20647	3.78062	0.172922	4.15315	-1.20934	-1.4705	-1.35244	0.55633	0.485983	0.717119	0.184173	0.326098	-0.135583	1.93057	2	c7orf65	nm_001123065
chr6	12354579	12355316	+	72	11	12354940	0.382219	2.40511	1.31714	1.36245	1.1869	0.332402	3.26425	3.20284	3.1112	0.254678	3.20581	4.46927	4.43246	0.207506	2.83915	-1.10805	-1.05925	-1.25826	0.201295	0.173895	0.132013	0.175233	0.654581	0.642648	1.31092	2	rnu6-48p	nr_103808
chr1	61914492	61915026	+	55	7	61914726	0.382219	1.83389	0.35922	0.363321	0.307715	0.451117	1.26358	0.736286	1.08028	0.416746	0.360204	0.506825	0.586649	0.380428	0.618231	-0.783276	-0.766902	-1.00655	1.0313	0.25212	0.805184	-0.779332	-0.286659	-0.075649	1.54845	2	rp5-833a20,1	nr_104180
chr4	129405960	129406420	+	47	6	129406168	0.350367	1.62345	0.758354	0.544981	0.791266	0.356145	1.26358	0.920357	1.77165	0.208373	1.69296	1.19795	1.20589	0.415012	1.12744	-0.572111	-1.04878	-0.51082	0.164464	-0.292789	0.652042	0.586491	0.0875112	0.0970418	0.885142	2	pgrmc2	nm_006320
chr1	21348708	21349197	+	33	5	21348997	0.254812	1.14243	1.67636	1.77119	1.14294	0.166201	3.6328	2.50337	2.37661	0.254678	3.27786	4.00852	3.45471	0.311259	2.64937	-0.660317	-0.580933	-1.2129	0.45543	-0.0817783	-0.156746	0.307101	0.597419	0.382913	0.890352	2	eif4g3	nm_003760
chr8	129912810	129913426	+	66	7	129913134	0.445922	2.22472	1.55662	1.58953	2.06608	0.284916	3.58015	4.1232	3.84579	0.370441	3.60204	2.67235	3.65026	0.311259	2.96511	-0.929668	-0.899488	-0.521188	0.271932	0.475678	0.375192	0.280727	-0.149979	0.299912	1.15772	2	linc00977	nr_033916
chr1	204263551	204263932	+	34	4	204263672	0.127406	1.38294	2.75402	2.49783	3.16506	0.427374	5.84407	5.77984	6.30882	0.300984	3.7101	3.17917	3.58507	0.518765	4.09155	-0.571108	-0.711974	-0.370415	0.514323	0.498381	0.624721	-0.141191	-0.363998	-0.190646	1.09697	2	plekha6	nm_014935
chr20	45962738	45963331	+	63	1	45963038	0.127406	1.92409	5.34839	5.44981	4.87947	0.356145	9.63481	9.75579	9.93855	0.277831	9.29326	9.44537	8.83232	0.345844	8.0642	-0.592425	-0.565325	-0.724805	0.256725	0.274727	0.301505	0.204654	0.228076	0.131262	0.905171	2	loc100131496	nr_024594
chr4	114370681	114371176	+	51	7	114370968	0.254812	1.71364	2.59437	2.31617	1.58253	0.664804	4.94903	4.27046	4.58038	0.509357	2.73755	2.62627	2.86806	0.345844	3.16942	-0.288836	-0.45248	-1.00199	0.642925	0.43017	0.531245	-0.211336	-0.271204	-0.144145	1.11588	2	mir8082	nr_107049
chr11	26868915	26869401	+	42	6	26869183	0.382219	1.62345	1.71628	1.40787	1.67045	0.308659	5.63347	5.30126	5.4446	0.162068	4.10632	5.75937	4.30209	0.415012	3.92686	-1.19409	-1.47986	-1.23314	0.520649	0.43296	0.471451	0.0644729	0.552536	0.131663	1.77738	2	slc5a12	nm_178498
chr1	78298435	78299105	+	59	10	78298810	0.222961	1.89402	4.98917	4.76859	5.01135	0.23743	11.1616	9.86623	10.5003	0.324136	8.42877	8.80032	8.63677	0.276675	8.01813	-0.684464	-0.749704	-0.678065	0.477212	0.299234	0.389093	0.0720572	0.13429	0.107227	1.09259	2	fam73a	nm_198549
chr12	76653392	76653941	+	47	3	76653710	0.350367	1.59338	3.39264	3.22447	3.78049	0.213687	7.73944	7.54693	6.74093	0.416746	7.52826	8.43172	8.11531	0.345844	6.2778	-0.887851	-0.961196	-0.731684	0.30197	0.265631	0.102689	0.262058	0.425568	0.370387	1.08367	2	bbs10	nm_024685
chr2	223617841	223618376	+	60	9	223618034	0.382219	1.95415	1.99567	1.72577	1.62649	0.427374	3.6328	3.27647	3.37047	0.601967	2.41337	2.44197	3.12879	0.311259	2.62353	-0.394638	-0.604268	-0.689748	0.46957	0.320632	0.361437	-0.120464	-0.103464	0.254095	0.946764	2	mogat1	nm_058165
chr6	155337048	155337640	+	49	6	155337396	0.159258	1.50319	0.798268	0.772057	0.57147	0.284916	1.36888	1.2885	1.51239	0.254678	0.93653	1.19795	1.10811	0.311259	1.06157	-0.411259	-0.459425	-0.893454	0.366793	0.279489	0.510625	-0.180806	0.174363	0.061903	0.973682	2	tiam2	nm_012454
chr3	185570237	185570819	+	45	4	185570536	0.350367	1.413	1.99567	2.81574	1.97816	0.379888	4.84373	4.82267	4.58038	0.277831	2.88163	2.5802	2.90065	0.311259	3.26654	-0.710889	-0.21425	-0.723599	0.568357	0.562071	0.487704	-0.180876	-0.34028	-0.171385	1.08896	2	igf2bp2	nm_006548
chr9	110904851	110905609	+	120	14	110905174	0.637031	3.72792	3.03342	3.04281	2.154	0.403631	8.05533	8.13596	8.08047	0.370441	6.69979	6.91124	6.68128	0.449597	5.86603	-0.951441	-0.946981	-1.44537	0.457559	0.471927	0.462055	0.191731	0.23656	0.187738	1.57844	2	klf4	nm_004235
chr4	74782835	74783299	+	32	4	74783032	0.222961	1.0823	2.23515	1.86202	1.84629	0.142458	3.89604	4.34409	4.19148	0.208373	2.91765	4.00852	2.7051	0.242091	3.11182	-0.477385	-0.740889	-0.753129	0.324253	0.481296	0.429702	-0.0929488	0.365314	-0.202073	1.06888	2	cxcl1	nm_001511
chr13	45495902	45496963	+	116	10	45496610	0.445922	3.48741	3.51238	3.86028	2.59359	0.379888	5.68612	6.11117	6.2224	0.300984	5.36704	7.23377	6.64868	0.138337	5.24838	-0.579424	-0.443166	-1.01692	0.115571	0.219577	0.245598	0.0322535	0.462875	0.341196	0.873419	2	nufip1	nm_012345
chr2	223964542	223965222	+	125	15	223964878	0.541476	3.87824	2.51454	2.04368	2.06608	0.356145	4.94903	4.78586	4.2779	0.416746	4.97081	5.39077	5.0191	0.587934	4.00198	-0.670416	-0.969543	-0.953814	0.306433	0.258065	0.0961899	0.31277	0.429779	0.326718	1.08482	2	kcne4	nm_080671
chr17	53532182	53532688	+	40	6	53532482	0.254812	1.29275	0.558787	0.726642	0.351674	0.23743	1.10563	1.32531	1.29633	0.115763	0.720408	0.552899	0.391099	0.207506	0.780977	-0.48298	-0.104036	-1.15104	0.501522	0.762983	0.731085	-0.116466	-0.498262	-0.997745	1.24455	2	mmd	nm_012329
chr1	180499515	180500171	+	99	5	180499886	0.350367	3.03645	0.918008	0.726642	1.09898	0.308659	1.57948	1.95116	1.9445	0.324136	1.44082	2.11945	1.85772	0.172922	1.51519	-0.722924	-1.06019	-0.463337	0.0599443	0.364827	0.359896	-0.0726171	0.484186	0.294031	1.01037	2	acbd6	nm_032360
chr5	41193660	41194341	+	72	7	41194036	0.445922	2.28485	0.918008	1.08996	0.615429	0.094972	3.4222	3.27647	3.41368	0.185221	1.62092	2.62627	2.54214	0.415012	2.16945	-1.24075	-0.993053	-1.81767	0.657593	0.594811	0.653995	-0.420521	0.275685	0.228714	1.98596	2	c6	nm_000065
chr11	78589732	78590126	+	47	7	78589896	0.286664	1.59338	0.319307	0.363321	0.307715	0.403631	1.15828	0.883543	1.08028	0.439899	0.540306	1.1058	0.651832	0.276675	0.712265	-1.15747	-0.97117	-1.21082	0.701503	0.310887	0.600916	-0.398637	0.634604	-0.127914	1.65092	2	nars2	nm_001243251
chr20	10584724	10585701	+	63	7	10585411	0.286664	1.95415	3.07333	4.40526	3.5607	0.308659	7.37089	7.06834	7.73479	0.208373	4.68265	4.93002	5.08429	0.380428	5.32336	-0.792535	-0.27311	-0.580179	0.469501	0.409034	0.539023	-0.185013	-0.110745	-0.0662924	1.02113	2	mir6870	nr_106930
chr10	101501856	101502475	+	47	5	101502182	0.286664	1.7437	2.03558	2.04368	1.75837	0.427374	5.68612	5.26444	5.09891	0.277831	4.21439	4.88395	4.30209	0.345844	3.92084	-0.945719	-0.939992	-1.15692	0.536283	0.42512	0.379027	0.104161	0.316886	0.133876	1.46102	2	cox15	nm_004376
chr7	127855208	127855951	+	74	8	127855562	0.541476	2.40511	3.83169	4.90483	4.08821	0.379888	14.3206	12.5169	12.3584	0.370441	10.6981	12.5324	10.9508	0.207506	9.57797	-1.32174	-0.965517	-1.22825	0.580299	0.38608	0.367696	0.159556	0.387869	0.19324	1.61653	2	mir129-1	nr_029596
chr1	192982115	192982668	+	103	12	192982368	0.637031	3.45734	2.15532	1.4987	2.06608	0.166201	3.5275	3.71824	3.45689	0.231526	2.95367	3.1331	3.22657	0.449597	2.85956	-0.407891	-0.932085	-0.468896	0.302851	0.378826	0.273679	0.0467146	0.131795	0.174205	0.921409	2	uchl5	nm_015984
chr9	134552436	134553001	+	54	7	134552617	0.382219	1.86396	4.59004	4.35985	4.13217	0.261173	10.056	10.1607	9.67928	0.439899	6.77183	8.47779	7.39829	0.449597	7.29178	-0.667764	-0.741992	-0.819372	0.463715	0.478663	0.40863	-0.106724	0.217418	0.0209213	1.19338	2	rapgef1	nm_198679
chr2	67890790	67891476	+	63	6	67891172	0.382219	1.98421	0.798268	0.544981	0.791266	0.403631	2.00067	2.46656	2.89514	0.277831	1.22469	1.1058	1.40144	0.449597	1.46987	-0.880743	-1.43141	-0.893453	0.444797	0.746812	0.977948	-0.263267	-0.410598	-0.0687789	1.79172	2	ac010987,6	nr_110271
chr5	158419329	158419851	+	42	7	158419555	0.159258	1.38294	1.27723	1.4987	0.923144	0.23743	4.00134	3.90231	4.92606	0.138915	3.06173	2.53412	3.61767	0.103753	2.86026	-1.16313	-0.932435	-1.63152	0.484339	0.448185	0.784291	0.0982036	-0.174659	0.338915	1.81463	2	ebf1	nm_024007
chr6	17945245	17945711	+	30	1	17945502	0.254812	1.05223	2.51454	2.08909	1.89025	0.332402	3.58015	3.53417	3.97542	0.324136	4.64663	5.25254	4.62801	0.311259	3.56787	-0.504766	-0.772184	-0.916488	0.0049573	-0.0136897	0.156046	0.381123	0.557955	0.375329	0.78025	2	kif13a	nm_001243423
chr9	98901832	98902305	+	39	4	98902044	0.254812	1.29275	0.35922	0.544981	0.527511	0.593575	1.63213	1.10443	1.5556	0.324136	0.93653	0.552899	1.1733	0.242091	0.931844	-1.37522	-0.773882	-0.820888	0.808593	0.24514	0.739311	0.00723731	-0.753071	0.332409	1.58768	2	loc158434	nm_001256408
chr2	158012442	158013063	+	52	8	158012786	0.286664	1.71364	0.558787	0.635811	0.615429	0.308659	1.89537	1.58301	1.77165	0.416746	1.04459	1.56655	1.36885	0.345844	1.22667	-1.13438	-0.94808	-0.995086	0.627731	0.367924	0.530347	-0.231812	0.352839	0.15821	1.53452	2	galnt5	nm_014568
chr13	40976931	40977401	+	36	4	40977190	0.286664	1.59338	1.15749	2.45242	1.53857	0.332402	4.26459	4.30727	3.84579	0.324136	4.93479	5.02217	5.21465	0.207506	3.63753	-1.65196	-0.568755	-1.24137	0.229449	0.243817	0.0803211	0.440032	0.465353	0.519614	1.33856	2	linc00598	nr_024505
chr16	85244886	85245239	+	24	3	85245024	0.222961	0.962043	2.31498	2.49783	1.80233	0.522346	4.47519	3.68143	3.75937	0.370441	3.92622	3.77815	3.8784	0.449597	3.34599	-0.531434	-0.421756	-0.89257	0.419516	0.137834	0.168057	0.23071	0.175247	0.21303	0.857056	2	linc00311	nr_038859
chr6	132297499	132298201	+	80	6	132297832	0.286664	2.46524	4.98917	4.99566	5.84658	0.166201	9.68746	9.90304	9.89534	0.208373	8.32071	9.62967	10.2664	0.380428	8.17044	-0.711613	-0.709739	-0.482822	0.245704	0.277458	0.276335	0.0262924	0.237072	0.329437	0.901224	2	ctgf	nm_001901
chr16	53805605	53806301	+	49	7	53805919	0.350367	1.59338	2.55446	2.22534	2.154	0.379888	7.42354	7.4733	8.81506	0.254678	6.15949	6.22012	6.68128	0.276675	5.52295	-1.11242	-1.31141	-1.35842	0.426668	0.436306	0.674531	0.15737	0.171502	0.274684	1.77325	2	fto	nm_001080432
chr17	28004036	28004702	+	81	8	28004337	0.605179	2.61555	1.55662	1.86202	1.31878	0.332402	6.42321	6.00073	5.61744	0.347289	2.84561	3.08702	2.67251	0.276675	3.4871	-1.16361	-0.905162	-1.40283	0.881264	0.783108	0.687884	-0.293291	-0.175814	-0.383834	1.94129	2	coro6	nm_032854
chr8	6462691	6463377	+	92	9	6463050	0.477773	2.826	2.19524	2.04368	2.24192	0.403631	6.21261	5.19081	6.56809	0.277831	4.43051	4.37712	4.36727	0.207506	4.18081	-0.929405	-1.03261	-0.899046	0.571419	0.31218	0.651692	0.0836911	0.0662013	0.0629518	1.46545	2	mir8055	nr_107022
chr3	185376162	185376840	+	70	8	185376458	0.477773	2.28485	3.83169	3.54238	4.08821	0.332402	9.16097	7.4733	8.25332	0.324136	7.52826	8.47779	6.94201	0.242091	6.58866	-0.782006	-0.895267	-0.688516	0.475515	0.181761	0.32499	0.192332	0.363704	0.0753686	1.11602	2	c3orf65	nr_027317
chr16	15670234	15670534	+	26	4	15670374	0.191109	0.811724	0.35922	0.227075	0.263755	0.498603	1.63213	1.0308	1.08028	0.694577	0.360204	0.645049	0.456282	0.587934	0.672755	-0.905211	-1.56691	-1.35088	1.2786	0.615613	0.68325	-0.901266	-0.0606706	-0.560154	2.13349	2	mir6506	nr_106761
chr15	63226450	63226949	+	35	3	63226705	0.254812	1.47313	3.8716	2.63408	2.90131	0.356145	8.00268	8.43047	7.86442	0.231526	7.38418	7.60237	7.13756	0.484181	6.20318	-0.68008	-1.23571	-1.09631	0.367475	0.442604	0.342331	0.251429	0.29344	0.202421	1.38817	2	tpm1	nm_001018007
chr8	78221311	78221951	+	59	5	78221673	0.350367	2.01428	0.319307	0.499566	0.659388	0.332402	1.10563	1.21487	0.993855	0.277831	0.97255	0.967574	1.5318	0.311259	0.918283	-1.52399	-0.878264	-0.477811	0.267862	0.403792	0.114096	0.0828335	0.0754325	0.738221	1.22194	2	pex2	nm_001172087
chr3	72541345	72541901	+	55	9	72541617	0.159258	1.65351	0.558787	1.08996	0.747307	0.451117	1.52683	1.76709	1.46918	0.162068	0.90051	1.56655	1.30366	0.276675	1.21443	-1.11991	-0.156001	-0.700507	0.330258	0.541093	0.274729	-0.431466	0.36731	0.102292	1.04083	2	rybp	nm_012234
chr7	19361580	19362200	+	65	8	19361911	0.477773	2.04434	0.638614	0.499566	0.747307	0.166201	1.73742	1.61983	1.5556	0.115763	1.29673	1.4744	1.72735	0.311259	1.2552	-0.974904	-1.32917	-0.748148	0.46903	0.367921	0.30955	0.0469618	0.232206	0.460643	1.39958	2	ferd3l	nm_152898
chr20	46093156	46093701	+	60	9	46093336	0.41407	1.89402	2.11541	2.81574	2.63755	0.189944	5.84407	4.96993	4.88285	0.300984	4.64663	5.52899	5.34502	0.415012	4.30958	-1.02661	-0.614034	-0.708346	0.439426	0.205679	0.180178	0.108639	0.359471	0.310649	1.05809	2	ncoa3	nm_001174088
chr14	89892140	89892675	+	48	7	89892442	0.0318515	1.50319	2.35489	2.54325	1.97816	0.284916	4.68578	3.75506	4.92606	0.254678	3.78214	3.73207	3.74803	0.103753	3.50061	-0.571945	-0.460934	-0.823442	0.420685	0.101231	0.492831	0.111599	0.0923721	0.0985291	0.957022	2	foxn3-as1	nr_036500
chr3	188186943	188187517	+	47	7	188187292	0.41407	1.83389	1.91584	1.8166	1.27482	0.23743	6.15996	5.85347	5.27175	0.185221	3.96224	5.02217	4.88874	0.242091	4.0184	-1.06864	-1.14538	-1.65633	0.6163	0.542671	0.391662	-0.020304	0.32169	0.282841	1.80699	2	lpp-as1	nr_046623
chr16	66284544	66285384	+	57	7	66284840	0.318515	1.71364	2.79394	2.67949	2.59359	0.47486	5.21227	4.82267	5.66065	0.578815	3.53	4.4232	3.12879	0.380428	3.87162	-0.470639	-0.53098	-0.577986	0.428975	0.316894	0.54803	-0.133271	0.192151	-0.307332	0.957834	2	cdh5	nm_001795
chr10	74002376	74002974	+	53	5	74002675	0.254812	1.62345	1.43688	1.54411	1.71441	0.356145	3.79074	3.27647	3.58652	0.486204	2.73755	3.686	3.12879	0.518765	2.76683	-0.945293	-0.841456	-0.690523	0.454247	0.243909	0.37435	-0.0153496	0.41382	0.177371	1.18326	2	ascc1	nr_045564
chr14	76114619	76115114	+	34	3	76114815	0.254812	1.59338	0.718441	1.27162	0.879184	0.308659	1.63213	1.84071	1.98771	0.277831	1.11663	1.70477	1.40144	0.415012	1.39474	-0.957053	-0.133324	-0.665757	0.226758	0.400272	0.511113	-0.32084	0.289586	0.00691405	0.964759	2	c14orf1	nm_007176
chr7	32060053	32060652	+	65	11	32060331	0.318515	2.04434	2.0755	2.22534	2.19796	0.332402	8.10798	6.40569	8.25332	0.0926103	4.03428	4.83787	4.39986	0.380428	4.72642	-1.18729	-1.08672	-1.10458	0.778594	0.438605	0.804226	-0.228436	0.0336235	-0.103289	1.80001	2	pde1c	nm_001191057
chr3	43750393	43750985	+	65	8	43750738	0.382219	2.07441	1.07766	0.908302	0.747307	0.261173	1.57948	1.61983	1.9445	0.370441	2.16122	2.16552	2.18364	0.345844	1.59861	-0.568911	-0.815571	-1.09704	-0.0173678	0.0190265	0.282584	0.435033	0.437901	0.449918	0.921922	2	abhd5	nm_016006
chr2	122259688	122260387	+	122	12	122259998	0.382219	3.78805	2.35489	3.17906	2.06608	0.498603	6.79175	6.62657	6.69772	0.370441	7.88846	8.84639	8.79973	0.345844	5.91674	-1.32914	-0.896204	-1.5179	0.198981	0.16346	0.178867	0.414942	0.580287	0.572657	1.42819	2	rnu4atac	nr_023343
chr1	65891346	65891835	+	39	6	65891648	0.350367	1.44306	3.2729	3.76945	2.85735	0.451117	11.7934	10.1976	12.4016	0.277831	9.76152	10.6894	9.94043	0.311259	8.29818	-1.34223	-1.13844	-1.53812	0.507116	0.297357	0.579657	0.234312	0.365313	0.260514	1.80097	2	leprot	nm_001198681
chr5	124179185	124179779	+	68	6	124179500	0.350367	2.22472	0.319307	0.499566	0.219796	0.403631	0.789739	0.809914	0.561744	0.185221	0.504285	0.691124	0.782198	0.103753	0.575297	-0.849363	-0.203632	-1.38814	0.457068	0.493462	-0.034394	-0.190067	0.264638	0.443227	1.11909	2	znf608	nm_020747
chr19	4130912	4131431	+	32	5	4131190	0.222961	1.0823	3.83169	4.72317	4.79156	0.379888	10.6878	9.64534	11.5374	0.509357	7.70836	8.61602	8.40863	0.449597	7.77221	-1.02035	-0.71857	-0.697832	0.459567	0.311507	0.569916	-0.011901	0.148696	0.113545	1.25925	2	map2k2	nm_030662
chr2	109941248	109941926	+	84	9	109941512	0.350367	2.64562	2.51454	2.407	1.84629	0.379888	5.37022	4.27046	5.01249	0.393594	3.74612	3.686	4.23691	0.242091	3.67667	-0.548103	-0.611163	-0.993772	0.546582	0.215991	0.447127	0.0269979	0.00365538	0.204612	1.12091	2	mir4266	nr_036224
chr10	18446700	18448062	+	91	8	18447768	0.286664	2.37504	0.997835	1.08996	0.703348	0.308659	2.79041	2.8347	2.46303	0.0926103	1.62092	1.93515	2.02068	0.138337	1.82845	-0.873747	-0.746341	-1.37831	0.609857	0.632577	0.429816	-0.173809	0.0818245	0.14422	1.55688	2	cacnb2	nm_201572
chr3	186732265	186732885	+	68	9	186732592	0.318515	2.10447	0.838181	1.40787	0.879184	0.403631	3.05366	3.64461	4.45074	0.370441	2.62949	2.7645	2.54214	0.449597	2.46782	-1.5579	-0.809725	-1.489	0.3073	0.562529	0.850809	0.0915451	0.16378	0.0428088	1.85909	2	st6gal1	nm_003032
chr2	179163499	179163932	+	31	2	179163742	0.159258	0.992107	1.39697	1.13538	1.14294	0.284916	2.89571	2.65063	2.63588	0.324136	1.98112	1.843	1.66217	0.691687	1.92709	-0.464123	-0.76325	-0.753673	0.587494	0.459912	0.451861	0.0398949	-0.0643676	-0.213353	1.1601	2	osbpl6	nm_145739
chr9	113337335	113337861	+	33	4	113337552	0.191109	1.14243	0.718441	1.22621	1.05502	0.308659	3.1063	3.49736	3.02478	0.370441	1.72898	2.3959	2.11845	0.622518	2.09683	-1.54527	-0.774004	-0.990935	0.566992	0.738058	0.528621	-0.278287	0.192359	0.0148039	1.71463	2	svep1	nm_153366
chr21	44144262	44144811	+	40	6	44144550	0.318515	1.35287	1.31714	1.40787	0.703348	0.641061	2.10597	2.3193	1.68523	0.463052	1.90908	1.843	1.40144	0.380428	1.63249	-0.30966	-0.213559	-1.21476	0.367414	0.506619	0.0458769	0.225807	0.174984	-0.220163	0.885963	2	pde9a	nm_001001571
chr1	65376366	65376742	+	37	6	65376591	0.318515	1.44306	0.558787	0.635811	0.57147	0.522346	0.947686	1.14124	1.29633	0.463052	1.47684	1.4744	1.36885	0.518765	1.05238	-0.913283	-0.726984	-0.880905	-0.151173	0.116952	0.300782	0.488855	0.486472	0.379306	0.929244	2	jak1	nm_002227
chr4	89533118	89533693	+	52	8	89533396	0.191109	1.65351	3.11324	3.36072	2.81339	0.379888	6.8444	6.29524	7.86442	0.300984	6.05143	7.64844	6.35536	0.276675	5.59407	-0.84548	-0.73513	-0.991589	0.291026	0.170364	0.491442	0.113376	0.451267	0.184075	1.17501	2	herc3	nm_001271602
chr21	46469982	46471001	+	85	10	46470456	0.41407	2.52536	3.71194	4.17819	3.82445	0.403631	11.0563	11.7806	10.8028	0.277831	9.32928	9.30714	8.05012	0.380428	8.00454	-1.10864	-0.93794	-1.06556	0.465984	0.55752	0.432512	0.220948	0.21752	0.00819316	1.52272	2	ssr4p1	nr_027292
chr18	10519848	10520446	+	56	9	10520152	0.127406	1.80383	0.23948	0.408736	0.219796	0.189944	0.473843	0.404957	0.648166	0.300984	0.648367	0.737199	0.586649	0.345844	0.485244	-1.0188	-0.247541	-1.14254	-0.0343002	-0.26094	0.417655	0.418101	0.603345	0.273787	0.843767	2	napg	nm_003826
chr3	185374095	185374585	+	59	10	185374401	0.191109	1.92409	3.91151	3.99653	3.86841	0.47486	12.2146	9.64534	10.1114	0.416746	6.48367	7.46414	7.23533	0.276675	7.21455	-0.883183	-0.852162	-0.899168	0.759628	0.418923	0.487001	-0.154099	0.0490669	0.00414977	1.43336	2	c3orf65	nr_027317
chr16	73019090	73019738	+	48	6	73019522	0.382219	1.56332	3.47246	3.08823	3.20902	0.427374	7.055	6.03754	5.8335	0.393594	5.6552	5.29862	5.57316	0.138337	5.02475	-0.533091	-0.702273	-0.646917	0.489594	0.26491	0.21531	0.170527	0.0765653	0.149445	0.950699	2	zfhx3	nm_006885
chr5	131007881	131008508	+	62	8	131008140	0.350367	2.04434	4.43039	3.95111	4.65968	0.379888	8.84507	9.60853	9.80892	0.347289	6.73581	7.14162	6.55091	0.276675	6.85912	-0.63059	-0.795763	-0.557792	0.366851	0.486293	0.516072	-0.0261705	0.0582285	-0.0663272	1.11779	2	rapgef6	nm_001164387
chr2	109934588	109935551	+	72	7	109935350	0.318515	2.22472	2.6742	3.13364	3.29694	0.427374	6.7391	6.55294	6.39524	0.393594	4.86275	4.33105	4.23691	0.345844	4.69142	-0.810919	-0.582184	-0.508896	0.522532	0.482119	0.446974	0.0517487	-0.115309	-0.147013	1.11787	2	mir4266	nr_036224
chr7	47644457	47644992	+	32	2	47644739	0.191109	0.962043	2.75402	2.86115	3.25298	0.332402	6.26526	6.66339	5.61744	0.463052	5.40306	6.91124	4.98651	0.449597	4.96834	-0.851223	-0.796168	-0.611001	0.33461	0.423492	0.177149	0.121012	0.476181	0.00526749	1.06455	2	ac095067,1	nr_108090
chr7	80410865	80411251	+	30	3	80411036	0.254812	1.413	2.27506	2.27075	1.71441	0.23743	5.15963	6.58976	6.00634	0.277831	3.74612	4.33105	4.36727	0.242091	4.05115	-0.832427	-0.835161	-1.24062	0.348933	0.701892	0.568153	-0.112936	0.0963823	0.1084	1.50906	2	cd36	nm_001289908
chr6	132301089	132301715	+	48	4	132301318	0.286664	1.56332	5.98701	5.90396	5.31907	0.308659	13.7415	13.4372	13.6979	0.416746	12.355	12.8549	12.0263	0.207506	10.5914	-0.82299	-0.843141	-0.993652	0.375638	0.343338	0.37106	0.222198	0.279423	0.183296	1.24994	2	ctgf	nm_001901
chr2	223958044	223958642	+	48	7	223958328	0.382219	1.53326	2.31498	2.45242	1.89025	0.189944	4.36989	3.97594	4.14826	0.509357	3.16979	4.2389	3.65026	0.345844	3.35674	-0.536064	-0.452859	-0.828487	0.380534	0.244235	0.305446	-0.0826727	0.336627	0.120937	0.915875	2	kcne4	nm_080671
chr1	14467266	14467684	+	31	3	14467448	0.286664	1.23262	0.758354	0.544981	0.483551	0.451117	1.68478	2.20886	2.37661	0.300984	0.792449	1.2901	1.01034	0.449597	1.23889	-0.708105	-1.18477	-1.35731	0.443507	0.834251	0.939856	-0.64466	0.0584325	-0.294209	1.8226	2	prdm2	nm_001007257
chr6	25012824	25013326	+	37	6	25013032	0.191109	1.26268	1.27723	1.40787	0.835225	0.593575	2.63246	2.8347	3.5001	0.393594	2.23326	2.16552	2.90065	0.587934	2.19856	-0.783541	-0.643045	-1.39632	0.259855	0.366639	0.670838	0.0225963	-0.0218421	0.399819	1.37341	2	fam65b	nm_001286446
chr15	51379617	51380192	+	51	5	51379916	0.382219	1.56332	0.35922	0.499566	0.351674	0.189944	0.526492	1.5462	1.68523	0.277831	1.04459	0.552899	1.30366	0.380428	0.874393	-1.28341	-0.807607	-1.31404	-0.73187	0.822373	0.946593	0.256584	-0.661265	0.576217	1.48072	2	tnfaip8l3	nm_207381
chr3	177552770	177553250	+	40	6	177552994	0.254812	1.29275	5.82735	7.8114	6.24221	0.332402	11.5302	12.2223	12.6176	0.416746	10.554	11.2884	12.1567	0.518765	10.0278	-0.783091	-0.360352	-0.683875	0.201411	0.285517	0.331438	0.0737823	0.170832	0.277743	0.881895	2	rp11-91k9,1	nr_110826
chr6	116760094	116760501	+	38	5	116760099	0.254812	1.71364	2.87376	2.27075	2.19796	0.118715	4.52783	4.8963	4.40753	0.0926103	4.32245	5.39077	5.0191	0.242091	3.98961	-0.473305	-0.813075	-0.860081	0.182574	0.295445	0.143724	0.115601	0.434244	0.331183	0.922735	2	fam26f	nm_001010919
chr16	12895279	12895842	+	39	4	12895590	0.286664	1.26268	5.02909	5.58606	4.13217	0.427374	8.79242	9.49809	9.20396	0.277831	7.56428	7.41807	8.08271	0.172922	7.25632	-0.528941	-0.377407	-0.812339	0.277023	0.3884	0.343018	0.0599657	0.0318061	0.155603	0.909043	2	cpped1	nm_001099455
chr10	31551495	31552254	+	94	8	31551862	0.382219	3.09658	3.75186	4.13277	3.25298	0.261173	7.47619	6.36887	7.34589	0.277831	6.59173	7.09554	6.77905	0.276675	5.8661	-0.644796	-0.505291	-0.850638	0.349902	0.118637	0.324535	0.168256	0.274512	0.208682	0.931266	2	zeb1-as1	nr_024284
chr6	141178808	141179686	+	86	6	141179170	0.350367	2.61555	2.47463	2.27075	1.49461	0.094972	5.15963	6.25843	7.47552	0.115763	5.58316	7.51022	6.38795	0.276675	4.95721	-1.00232	-1.12636	-1.72976	0.0577375	0.336272	0.592645	0.171553	0.599326	0.365825	1.61503	2	mir4465	nr_039675
chr17	48463600	48464258	+	78	9	48463932	0.382219	2.40511	0.758354	0.681226	0.439592	0.759776	1.57948	1.2885	0.993855	0.347289	0.756428	1.1058	0.61924	0.242091	0.913608	-0.268703	-0.423441	-1.05541	0.7898	0.496045	0.12146	-0.272372	0.275442	-0.561076	1.05162	2	lrrc59	nm_018509
chr18	8341519	8342164	+	59	7	8341792	0.318515	1.95415	2.31498	2.31617	1.67045	0.451117	3.6328	3.71824	4.88285	0.254678	4.0703	3.63992	3.35693	0.311259	3.28918	-0.506732	-0.505988	-0.977492	0.143351	0.176892	0.569995	0.307407	0.146178	0.0294146	0.96015	2	rp11-789c17,3	nr_024419
chr13	23923198	23923750	+	44	7	23923408	0.254812	1.80383	1.55662	1.72577	1.67045	0.451117	4.68578	4.56497	4.79643	0.300984	3.3499	3.1331	3.45471	0.276675	3.2153	-1.04654	-0.897712	-0.944718	0.543335	0.505651	0.577006	0.0591613	-0.0373656	0.103609	1.50499	2	sacs	nm_001278055
chr15	58495739	58496157	+	36	6	58495932	0.222961	1.20255	1.39697	1.22621	1.27482	0.356145	3.26425	2.42974	2.80872	0.439899	2.05316	1.6587	2.34659	0.311259	2.05102	-0.554041	-0.742137	-0.68605	0.670412	0.244463	0.453573	0.00150711	-0.306289	0.194228	1.11689	2	aqp9	nm_020980
chr4	169804603	169805121	+	47	6	169804912	0.382219	1.80383	1.43688	0.999132	1.45065	0.356145	3.47485	2.72426	3.32725	0.231526	2.48541	3.82422	4.07395	0.207506	2.64407	-0.879817	-1.40401	-0.866055	0.394192	0.0431042	0.331573	-0.089277	0.532407	0.623669	1.30625	2	palld	nm_001166110
chr5	91887742	91888915	+	123	13	91888410	0.382219	3.66779	1.51671	1.36245	1.1869	0.094972	2.94836	3.46054	4.2779	0.0694577	2.66551	4.14675	3.51989	0.103753	2.78722	-0.877884	-1.03262	-1.23163	0.081083	0.31217	0.618074	-0.0644175	0.573151	0.336703	1.38449	2	nr2f1-as1	nr_109825
chr16	66070500	66071429	+	85	12	66070834	0.605179	2.61555	1.1974	1.27162	1.58253	0.522346	3.84339	3.57099	3.02478	0.370441	1.62092	1.6587	1.69476	0.311259	2.16279	-0.852985	-0.766222	-0.450658	0.829489	0.72343	0.483936	-0.416082	-0.382841	-0.351809	1.36891	2	cdh5	nm_001795
chr14	75709187	75709739	+	47	8	75709519	0.191109	1.50319	0.399134	0.681226	0.835225	0.332402	1.57948	1.47257	1.46918	0.578815	0.756428	1.19795	0.945156	0.449597	1.03737	-1.37799	-0.606726	-0.312696	0.606514	0.505405	0.502076	-0.455658	0.207634	-0.134308	1.3038	2	fos	nm_005252
chr3	104671218	104671958	+	74	9	104671538	0.318515	2.34498	1.4768	1.77119	2.02212	0.261173	5.52817	4.78586	4.62359	0.277831	3.45796	3.63992	3.51989	0.207506	3.42505	-1.21366	-0.951409	-0.760255	0.690675	0.48265	0.432885	0.0137929	0.0877803	0.039404	1.51051	2	alcam	nm_001627
chr21	46461043	46461630	+	39	3	46461344	0.191109	1.29275	3.35272	2.9974	3.86841	0.617318	12.8464	12.9218	11.9263	0.324136	9.11316	8.43172	8.99528	0.345844	8.27258	-1.303	-1.46463	-1.0966	0.634957	0.6434	0.527733	0.139615	0.0274899	0.120831	1.89011	2	ssr4p1	nr_027292
chr1	184591345	184591851	+	48	8	184591586	0.350367	1.68358	1.99567	1.8166	1.93421	0.498603	7.84474	5.52214	6.91377	0.347289	2.70153	3.1331	2.83547	0.415012	3.85525	-0.949951	-1.08558	-0.995082	1.0249	0.518405	0.84265	-0.513047	-0.299234	-0.443236	1.80552	2	edem3	nm_025191
chr11	66703697	66704175	+	31	3	66703942	0.0955546	0.931979	2.23515	2.13451	2.06608	0.451117	5.63347	5.00674	5.96313	0.578815	2.91765	3.45562	3.0962	0.380428	3.61206	-0.692451	-0.758918	-0.805924	0.641201	0.47105	0.723247	-0.308015	-0.0638774	-0.222324	1.36426	2	pc	nm_001040716
chr11	9548947	9549626	+	61	4	9549350	0.350367	1.83389	2.47463	2.72491	1.89025	0.332402	5.10698	5.154	5.14212	0.416746	5.07887	5.85152	4.82356	0.380428	4.24965	-0.78013	-0.641137	-1.16877	0.265126	0.27835	0.27502	0.257166	0.461468	0.182754	1.13618	2	wee1	nm_003390
chr10	4103693	4104326	+	59	10	4103952	0.350367	2.1646	1.99567	2.90657	2.3738	0.403631	4.79108	5.48533	5.4446	0.254678	3.74612	4.33105	4.82356	0.242091	3.98864	-0.999024	-0.456581	-0.7487	0.264454	0.459681	0.448928	-0.0904998	0.118818	0.2742	1.12579	2	mir6078	nr_106726
chr11	111194831	111195460	+	44	6	111195079	0.318515	1.413	0.957921	1.08996	0.659388	0.356145	1.73742	2.39293	2.50624	0.300984	1.98112	1.52047	1.62958	0.345844	1.60834	-0.747592	-0.561293	-1.28637	0.11138	0.573207	0.639956	0.300746	-0.0810501	0.018929	1.3066	2	mir4491	nr_039712
chr2	210360544	210361267	+	61	8	210360908	0.318515	2.1646	1.35706	0.999132	0.967103	0.356145	1.73742	2.0616	2.11734	0.185221	1.98112	2.3959	2.44437	0.587934	1.78456	-0.39509	-0.836822	-0.883828	-0.0386185	0.208196	0.246686	0.150748	0.424997	0.453893	0.844001	2	map2	nm_001039538
chr10	78095904	78096554	+	48	3	78096282	0.222961	1.59338	1.07766	1.22621	1.14294	0.284916	4.42254	4.1232	4.53716	0.347289	2.59347	2.30375	2.41178	0.484181	2.64874	-1.2974	-1.11111	-1.21256	0.739565	0.638456	0.776482	-0.0304263	-0.201326	-0.135212	1.92519	2	c10orf11	nm_032024
chr12	94207685	94208238	+	54	9	94207982	0.350367	1.92409	1.75619	2.45242	2.46172	0.356145	6.05466	5.9271	5.22854	0.509357	2.88163	3.08702	2.77029	0.311259	3.6244	-1.04529	-0.563537	-0.558076	0.740306	0.709586	0.528668	-0.330855	-0.231525	-0.387706	1.38182	2	rp11-887p2,5	nr_110093
chr17	34105232	34105573	+	35	4	34105265	0.191109	1.44306	2.95359	2.22534	2.41776	0.189944	4.89638	4.8963	5.48781	0.324136	4.0703	4.37712	4.00877	0.276675	3.92593	-0.410564	-0.819009	-0.699365	0.318681	0.318658	0.483196	0.0521022	0.156948	0.0301238	1.01649	2	mmp28	nm_001032278
chr20	39877172	39877726	+	54	8	39877422	0.41407	2.10447	4.35056	4.49609	4.308	0.356145	11.0563	9.64534	9.63607	0.162068	8.86102	10.8276	10.1034	0.242091	8.14272	-0.904309	-0.856838	-0.91849	0.441292	0.244323	0.242935	0.121962	0.411134	0.311258	1.20273	2	zhx3	nm_015035
chr2	74428709	74429118	+	27	2	74428992	0.159258	0.992107	0.558787	0.953717	0.879184	0.379888	3.15895	2.94514	2.67909	0.393594	1.22469	1.42832	1.85772	0.449597	1.74285	-1.64107	-0.869812	-0.987207	0.858002	0.756893	0.620297	-0.509025	-0.287122	0.0920887	1.91109	2	mthfd2	nm_006636
chr7	7602284	7602718	+	28	2	7602526	0.254812	1.02217	0.878095	0.635811	0.923144	0.356145	2.47451	1.91434	1.85808	0.393594	2.3053	1.93515	1.82513	0.345844	1.63884	-0.900227	-1.366	-0.828049	0.59447	0.224174	0.181135	0.492282	0.239768	0.155323	1.36469	2	rp5-1159o4,2	nr_110084
chr1	21879100	21879528	+	26	2	21879384	0.0955546	0.811724	1.39697	1.58953	1.23086	0.284916	3.1063	3.01877	2.63588	0.277831	2.77357	3.17917	2.63992	0.380428	2.39677	-0.778795	-0.592495	-0.96143	0.374105	0.332868	0.137189	0.21065	0.407557	0.139399	1.05896	2	alpl	nm_001177520
chr2	210338404	210339050	+	75	9	210338748	0.350367	2.40511	0.638614	0.408736	0.439592	0.213687	1.00034	1.0308	0.907433	0.254678	0.792449	1.2901	1.1733	0.207506	0.853484	-0.418419	-1.0622	-0.957198	0.229048	0.272329	0.0884271	-0.107047	0.596046	0.459133	1.00921	2	map2	nm_001039538
chr8	133963685	133964026	+	37	4	133963720	0.382219	1.53326	0.319307	0.544981	0.703348	0.379888	1.36888	0.920357	1.29633	0.601967	0.684387	0.414675	0.651832	0.484181	0.767122	-1.26451	-0.49325	-0.125219	0.835468	0.262738	0.756908	-0.164643	-0.887477	-0.234957	1.24603	2	tg	nm_003235
chr3	45037012	45037312	+	37	6	45037101	0.318515	1.29275	1.15749	1.27162	1.23086	0.403631	2.42186	2.35611	2.37661	0.486204	1.72898	1.4744	1.62958	0.518765	1.73861	-0.586939	-0.451266	-0.498272	0.478182	0.438473	0.450969	-0.00801667	-0.23781	-0.093437	0.968034	2	exosc7	nr_023353
chr3	148299523	148300470	+	54	6	148299841	0.382219	1.65351	0.478961	0.999132	0.659388	0.284916	1.15828	1.17806	1.46918	0.231526	0.93653	1.05972	1.20589	0.276675	1.01613	-1.0851	-0.0243331	-0.62388	0.188908	0.213329	0.531928	-0.117683	0.060608	0.247016	0.88916	2	agtr1	nm_004835
chr1	63248109	63248589	+	34	4	63248458	0.254812	1.11236	0.798268	0.272491	0.703348	0.427374	1.21093	1.39894	1.1667	0.416746	0.864489	1.24402	1.1733	0.415012	0.981388	-0.297951	-1.84862	-0.480586	0.303223	0.511442	0.249538	-0.182975	0.342119	0.257673	1.23045	2	atg4c	nm_032852
chr2	201542609	201543391	+	71	8	201543104	0.477773	2.19466	0.918008	1.58953	1.49461	0.284916	3.7381	4.08639	3.93221	0.277831	3.63806	3.5017	3.29175	0.449597	2.91004	-1.66446	-0.87244	-0.961266	0.361265	0.489787	0.434302	0.322131	0.267016	0.177817	1.59451	2	aox2p	nr_001557
chr5	157542462	157543416	+	100	15	157543091	0.637031	3.03645	0.638614	0.726642	0.615429	0.166201	5.15963	5.6694	6.95699	0.185221	2.88163	4.0546	3.65026	0.345844	3.37258	-2.40083	-2.21454	-2.45419	0.613415	0.749345	1.04461	-0.226965	0.265707	0.114148	3.15898	1	clint1	nm_001195556	Gain
chr16	19147828	19148826	+	76	13	19148192	0.286664	2.28485	1.31714	2.08909	1.62649	0.284916	7.00235	6.92109	7.778	0.162068	6.15949	6.03582	6.42054	0.415012	5.03889	-1.9357	-1.27023	-1.63134	0.474733	0.457893	0.626293	0.289704	0.260444	0.349589	2.13206	1	itpripl2	nm_001034841	Gain
chr4	184509541	184509851	+	39	6	184509654	0.318515	1.56332	0.678528	0.726642	0.791266	0.403631	5.94936	5.55896	6.30882	0.486204	4.21439	3.82422	3.51989	0.345844	3.50801	-2.37017	-2.27134	-2.14842	0.762083	0.664162	0.846718	0.26467	0.124514	0.00487889	3.02096	1	rwdd4	nm_152682	Gain
chr14	87105559	87105944	+	28	3	87105748	0.222961	1.17249	0.957921	1.04455	0.615429	0.213687	3.05366	4.78586	4.06184	0.324136	4.93479	5.57507	5.63834	0.345844	3.4075	-1.83073	-1.70583	-2.46905	-0.158174	0.490066	0.253423	0.534278	0.710278	0.72656	2.19698	1	loc283585	nr_038445	Gain
chr2	43496877	43497419	+	37	6	43497140	0.445922	1.86396	1.7961	2.22534	2.24192	0.379888	8.05533	8.46729	8.25332	0.231526	5.6552	6.63479	5.96426	0.55335	5.47706	-1.60853	-1.29938	-1.28867	0.556542	0.628498	0.591572	0.0461761	0.276649	0.122941	1.99106	1	linc01126	nr_027251	Gain
chr1	16521785	16522374	+	36	5	16522179	0.222961	1.0823	0.518874	0.681226	0.835225	0.522346	6.7391	6.99472	7.12983	0.416746	2.77357	2.9488	3.19398	0.415012	3.53504	-2.76827	-2.37552	-2.08149	0.930832	0.984541	1.01214	-0.349981	-0.261598	-0.146371	3.38426	1	arhgef19	nm_153213	Gain
chr19	18128158	18128751	+	44	4	18128510	0.286664	1.44306	0.878095	2.04368	1.75837	0.617318	11.8987	12.2223	10.7596	0.486204	9.1852	8.56994	8.40863	0.276675	7.30273	-3.05599	-1.83727	-2.0542	0.7043	0.743014	0.559112	0.330876	0.23085	0.203435	2.98463	1	arrdc2	nm_015683	Gain
chr12	93521167	93521850	+	114	15	93521522	0.668883	3.5776	0.878095	0.953717	1.14294	0.332402	6.47586	7.03153	7.0002	0.277831	4.68265	6.81909	5.4428	0.311259	4.49187	-2.35487	-2.23568	-1.97457	0.527753	0.646521	0.640078	0.0600076	0.602262	0.27703	2.79316	1	eea1	nm_003566	Gain
chr9	92171359	92171917	+	47	8	92171660	0.350367	1.47313	0.279394	0.0908302	0.175837	0.379888	0.947686	0.846729	1.12349	0.347289	0.612347	0.737199	0.358507	0.484181	0.574669	-1.04043	-2.66149	-1.70849	0.721679	0.55917	0.967183	0.0916182	0.359324	-0.680727	2.55281	1	gadd45g	nm_006705	Gain
chrx	106916984	106917413	+	25	2	106917251	0.191109	1.0823	0.758354	1.22621	0.703348	0.213687	5.79142	5.77984	5.87671	0.162068	4.32245	5.34469	4.75837	0.345844	3.84015	-2.34022	-1.64696	-2.44885	0.592752	0.589866	0.613844	0.170684	0.476943	0.309304	2.74417	1	tsc22d3	nm_001015881	Gain
chr5	66564349	66564751	+	41	6	66564568	0.191109	1.83389	2.11541	2.72491	2.24192	0.427374	9.84541	11.1547	9.76571	0.347289	8.10459	9.07677	8.40863	0.345844	7.04867	-1.73641	-1.37115	-1.65262	0.482099	0.662232	0.470373	0.201387	0.364827	0.254519	2.12496	1	cd180	nm_005582	Gain
chr9	22342304	22343117	+	85	10	22342576	0.382219	2.70575	0.957921	0.862887	0.439592	0.213687	2.52716	2.09841	2.46303	0.185221	2.62949	3.59385	2.67251	0.138337	2.02721	-1.08151	-1.23225	-2.20526	0.318026	0.0498069	0.280943	0.375289	0.826036	0.398703	1.7226	1	dmrta1	nm_022160	Gain
chr14	64541607	64542238	+	72	3	64541886	0.318515	2.28485	0.319307	0.18166	0.219796	0.403631	1.42153	0.809914	1.20991	0.486204	1.33275	1.6587	1.46662	0.276675	0.957799	-1.58478	-2.39848	-2.12356	0.569649	-0.241954	0.337105	0.476616	0.792257	0.614702	2.25721	1	syne2	nm_182913	Gain
chr15	25982175	25982961	+	88	11	25982572	0.159258	2.73581	2.59437	2.81574	2.3738	0.332402	11.7408	12.2592	13.6547	0.347289	9.58142	10.6433	10.0056	0.380428	8.40766	-1.69632	-1.57819	-1.82451	0.481753	0.544084	0.699623	0.188536	0.340172	0.251035	2.27483	1	mir4715	nr_039865	Gain
chr2	43691643	43692106	+	36	3	43691868	0.159258	1.26268	1.55662	1.8166	1.67045	0.142458	7.58149	7.65737	8.38295	0.254678	6.30357	7.04947	7.56125	0.311259	5.50886	-1.82334	-1.60051	-1.72152	0.460727	0.475095	0.605704	0.194414	0.35576	0.45687	2.22896	1	thada	nm_001083953	Gain
chr13	40810115	40810809	+	70	6	40810511	0.477773	2.37504	2.19524	2.17992	2.32984	0.522346	11.9514	10.4553	9.98176	0.185221	8.06857	8.20134	6.48573	0.311259	6.87211	-1.64638	-1.65648	-1.56052	0.798351	0.605403	0.53854	0.231558	0.255106	-0.083486	2.26856	1	linc00548	nr_033877	Gain
chr1	62103795	62104519	+	83	12	62104238	0.445922	2.67568	0.518874	0.408736	0.131878	0.261173	3.15895	3.01877	2.7223	0.254678	1.08061	1.6587	1.98809	0.207506	1.63188	-1.65308	-1.99729	-3.62926	0.952913	0.887428	0.738292	-0.594686	0.0235176	0.284847	3.28609	1	mgc34796	nr_073400	Gain
chr4	20605656	20605956	+	27	4	20605800	0.222961	1.20255	0.838181	1.13538	1.1869	0.308659	3.58015	4.82267	4.36432	0.486204	5.11489	3.8703	4.17172	0.345844	3.23161	-1.94692	-1.50908	-1.44506	0.147765	0.577578	0.433503	0.66245	0.26019	0.368389	2.01997	1	mir218-1	nr_029631	Gain
chr12	87641476	87642114	+	57	5	87641920	0.254812	1.77377	0.518874	0.363321	0.615429	0.23743	3.47485	3.6078	4.14826	0.254678	1.51286	1.6587	1.82513	0.311259	1.96947	-1.92435	-2.43849	-1.67814	0.819144	0.873313	1.0747	-0.380532	-0.247755	-0.109808	2.93605	1	mgat4c	nm_013244	Gain
chr15	99048826	99049454	+	62	9	99049157	0.286664	1.98421	0.478961	0.363321	0.351674	0.546089	2.26392	2.17204	1.98771	0.463052	0.576326	1.24402	0.782198	0.657103	1.13557	-1.24544	-1.64411	-1.69111	0.995398	0.93563	0.807685	-0.978465	0.131591	-0.537817	2.43979	1	fam169b	nm_182562	Gain
chr3	12266234	12266746	+	56	5	12266454	0.350367	1.80383	0.439047	0.499566	0.527511	0.379888	2.52716	2.3193	2.67909	0.439899	1.9451	1.93515	1.5644	0.657103	1.60404	-1.86926	-1.68296	-1.60443	0.655813	0.531983	0.740036	0.278139	0.270738	-0.0361002	2.36149	1	pparg	nm_005037	Gain
chr18	56720428	56721042	+	66	11	56720753	0.350367	2.13453	0.918008	1.13538	0.879184	0.213687	5.05433	4.34409	4.53716	0.162068	2.41337	2.07337	2.50955	0.380428	2.6516	-1.53029	-1.22369	-1.59263	0.930653	0.712187	0.774926	-0.135819	-0.354886	-0.0794354	2.25479	1	oacylp	nr_024021	Gain
chr2	168994810	168995354	+	41	6	168995148	0.222961	1.53326	1.1974	0.999132	0.747307	0.403631	3.94869	4.30727	4.49395	0.439899	3.60204	2.9488	3.91099	0.380428	2.90618	-1.27922	-1.54037	-1.95935	0.442253	0.567652	0.628863	0.309692	0.0210044	0.428412	2.13924	1	stk39	nm_013233	Gain
chr2	121954957	121955535	+	45	6	121955160	0.286664	1.47313	0.798268	1.08996	0.967103	0.451117	10.6878	9.35083	9.85213	0.277831	7.16806	8.80032	7.49607	0.207506	6.24561	-2.9679	-2.51857	-2.6911	0.775049	0.582251	0.657592	0.198739	0.494712	0.26329	3.39749	1	tfcp2l1	nm_014553	Gain
chr1	61784061	61784626	+	43	5	61784362	0.222961	1.413	1.63645	1.58953	1.31878	0.142458	7.00235	6.1848	7.34589	0.138915	4.46653	4.83787	4.85615	0.138337	4.35981	-1.4137	-1.45567	-1.72507	0.683572	0.50446	0.75267	0.0348869	0.150105	0.155545	2.17838	1	rp5-833a20,1	nr_104180	Gain
chr20	35572541	35573095	+	44	3	35572823	0.286664	1.53326	0.319307	0.136245	0.615429	0.308659	4.84373	5.33807	4.2779	0.231526	2.08918	2.30375	2.08586	0.311259	2.4455	-2.93711	-4.16585	-1.99046	0.985991	1.12619	0.806774	-0.227189	-0.086145	-0.229484	4.00413	1	samhd1	nm_015474	Gain
chr8	128403257	128403922	+	87	12	128403610	0.350367	2.79594	2.3948	2.22534	2.50568	0.498603	10.8457	9.7926	10.025	0.324136	6.98796	8.38564	7.23533	0.449597	6.7109	-1.4866	-1.59248	-1.42131	0.692551	0.545187	0.579021	0.0583649	0.321416	0.108554	2.10571	1	ccat2	nr_109834	Gain
chr15	58805865	58806406	+	44	7	58806212	0.286664	1.47313	0.279394	0.454151	0.219796	0.498603	1.63213	1.06761	1.38275	0.347289	1.22469	1.15187	1.10811	0.726272	0.946724	-1.76064	-1.05977	-2.10678	0.785737	0.173375	0.546529	0.371404	0.282967	0.22709	2.14428	1	lipc	nm_000236	Gain
chr15	58843849	58844351	+	77	11	58844060	0.41407	2.61555	2.75402	2.58866	1.75837	0.47486	8.05533	7.731	7.60515	0.300984	8.21265	10.2286	8.21308	0.345844	6.34966	-1.20514	-1.29447	-1.85244	0.343266	0.283977	0.260299	0.371169	0.687864	0.371245	1.74653	1	lipc	nm_000236	Gain
chr5	159213867	159214773	+	122	11	159214400	0.382219	3.72792	0.878095	0.817472	1.36274	0.546089	7.1603	6.9579	6.74093	0.370441	5.69122	5.85152	5.60575	0.449597	4.56288	-2.3775	-2.4807	-1.74344	0.650074	0.608707	0.563003	0.318793	0.358866	0.296963	2.80781	1	ac011343,1	nr_109891	Gain
chr5	172202498	172203024	+	38	5	172202784	0.222961	1.26268	1.83602	1.54411	1.97816	0.498603	8.58183	7.9887	8.51259	0.370441	6.62775	5.98974	6.38795	0.415012	5.49409	-1.5813	-1.8311	-1.47372	0.643403	0.540079	0.631716	0.270638	0.124613	0.217472	2.23377	1	dusp1	nm_004417	Gain
chr4	138659517	138660230	+	78	8	138659860	0.509625	2.37504	0.199567	0.499566	0.219796	0.118715	1.36888	0.920357	1.1667	0.393594	1.08061	1.1058	1.14071	0.242091	0.855776	-2.10036	-0.776557	-1.96107	0.677691	0.104961	0.447128	0.336543	0.369784	0.414622	2.02259	1	pcdh18	nm_019035	Gain
chr5	66544446	66545136	+	67	9	66544720	0.318515	2.13453	0.638614	0.544981	0.483551	0.332402	2.94836	3.6078	3.62973	0.300984	1.87306	2.85665	2.73769	0.345844	2.14672	-1.74911	-1.97785	-2.15039	0.45778	0.748989	0.757732	-0.196734	0.412192	0.35083	2.61395	1	cd180	nm_005582	Gain
chr7	139553295	139554426	+	141	14	139553681	0.477773	4.08868	0.598701	1.45328	0.791266	0.569832	5.79142	5.85347	7.43231	0.62512	4.68265	4.7918	4.53023	0.449597	3.99168	-2.73709	-1.45768	-2.33476	0.53692	0.552296	0.896814	0.230329	0.26357	0.182588	2.83852	1	tbxas1	nm_001166253	Gain
chr5	175236793	175237401	+	101	9	175237141	0.382219	3.27696	0.478961	0.681226	0.351674	0.332402	3.2116	3.42373	2.54945	0.509357	2.73755	2.85665	3.45471	0.311259	2.19395	-2.19555	-1.68732	-2.64122	0.549763	0.642038	0.216658	0.319354	0.380792	0.655033	2.64419	1	cplx2	nm_006650	Gain
chr4	124981379	124982192	+	65	9	124981813	0.318515	2.07441	0.838181	0.999132	0.57147	0.284916	5.37022	6.14799	6.35203	0.115763	5.18694	5.62114	5.08429	0.207506	4.01904	-2.26152	-2.0081	-2.8141	0.41813	0.613262	0.660366	0.36803	0.484012	0.339194	2.92516	1	linc01091	nr_027106	Gain
chr8	23997202	23997976	+	70	8	23997616	0.477773	2.25479	0.678528	0.590396	0.527511	0.189944	4.42254	3.75506	3.889	0.300984	2.98969	3.08702	3.55248	0.311259	2.61025	-1.94371	-2.14443	-2.30691	0.760687	0.524649	0.575212	0.195811	0.242029	0.444641	2.75187	1	adam28	nm_021777	Gain
chr15	40120672	40121372	+	97	6	40121095	0.41407	3.06651	0.718441	0.726642	0.791266	0.617318	3.84339	4.3809	2.98157	0.370441	5.00683	5.29862	5.50798	0.345844	3.25063	-2.17778	-2.1614	-2.03848	0.241663	0.43051	-0.124648	0.623181	0.704899	0.760805	2.3084	1	gpr176	nm_001271855	Gain
chr1	159749312	159749676	+	40	6	159749458	0.318515	1.38294	1.63645	2.13451	1.75837	0.261173	6.58115	7.43649	7.3891	0.347289	5.87132	6.86517	6.5835	0.207506	5.13956	-1.65108	-1.26774	-1.54741	0.356695	0.532976	0.523753	0.19204	0.41765	0.35721	1.95988	1	dusp23	nm_017823	Gain
chr18	52624443	52625108	+	51	7	52624836	0.191109	1.62345	0.638614	0.272491	0.351674	0.213687	2.73776	2.94514	3.1112	0.138915	2.01714	1.93515	1.5318	0.172922	1.72678	-1.43506	-2.6638	-2.29577	0.664916	0.770258	0.84939	0.224232	0.164364	-0.172848	2.89307	1	ccdc68	nm_001143829	Gain
chr1	172715237	172715931	+	126	5	172715634	0.318515	3.9083	0.319307	0.544981	0.527511	0.379888	2.42186	2.28249	2.50624	0.162068	2.52143	2.85665	3.03102	0.276675	1.89017	-2.5655	-1.79423	-1.84124	0.357606	0.272094	0.407014	0.415728	0.595811	0.68129	2.41256	1	faslg	nm_000639	Gain
chr4	188052918	188053311	+	30	3	188053181	0.191109	1.02217	0.0798268	0.136245	0.307715	0.23743	1.31623	1.25169	1.1667	0.0926103	1.18867	1.19795	1.33626	0.242091	0.886809	-3.47368	-2.70242	-1.52703	0.569718	0.497177	0.395738	0.422657	0.433871	0.5915	3.05525	1	rp11-138b4,1	nr_038931	Gain
chr10	117797748	117798192	+	30	3	117797957	0.0955546	1.14243	0.159654	0.499566	0.351674	0.189944	1.63213	1.14124	1.1667	0.277831	0.720408	1.01365	1.01034	0.55335	0.85504	-2.42105	-0.775316	-1.28175	0.932689	0.416543	0.44837	-0.247178	0.245495	0.240776	2.09191	1	gfra1	nm_145793	Gain
chr20	32858001	32858572	+	37	5	32858322	0.191109	1.20255	0.35922	0.227075	0.439592	0.498603	3.79074	4.27046	4.53716	0.486204	1.90908	1.52047	1.72735	0.518765	2.0868	-2.53835	-3.20005	-2.24705	0.861192	1.0331	1.1205	-0.128412	-0.456769	-0.272726	3.66675	1	asip	nm_001672	Gain
chrx	147446722	147447042	+	20	3	147446914	0.0637031	0.661405	0.0399134	0.227075	0.0879184	0.23743	2.42186	2.8347	3.37047	0.185221	1.54888	1.56655	1.5318	0.0691687	1.51435	-5.24568	-2.73746	-4.10639	0.677418	0.904496	1.15425	0.0325217	0.0488889	0.0165318	4.9419	0	aff2	nm_001169125	Gain
chr2	21261576	21262238	+	58	7	21261876	0.382219	1.95415	0.199567	0.18166	0.351674	0.688547	7.73944	8.54092	7.43231	0.231526	6.66377	7.32592	7.13756	0.345844	5.06365	-4.66523	-4.80086	-3.84787	0.612052	0.754214	0.553634	0.396163	0.532833	0.495254	5.07795	0	apob	nm_000384	Gain
chr11	114030457	114031333	+	140	17	114030964	0.191109	4.29913	0.319307	0.0908302	0.263755	0.546089	8.21328	8.17277	8.12369	0.324136	6.98796	7.51022	7.07237	0.345844	5.19491	-4.02408	-5.83778	-4.29983	0.66086	0.653727	0.645036	0.427772	0.531756	0.445096	5.37377	0	zbtb16	nm_001018011	Gain
chr11	114033418	114034066	+	57	0	114033768	0.477773	1.98421	0.0798268	0.227075	0.175837	0.47486	12.0567	11.9278	9.93855	0.231526	8.39275	11.1962	9.25601	0.103753	7.02786	-6.46007	-4.95184	-5.32078	0.778674	0.763174	0.499949	0.256057	0.671853	0.397304	6.25816	0	zbtb16	nm_001018011	Gain
chr4	83522661	83523328	+	86	13	83523091	0.668883	2.826	0.23948	0.227075	0.131878	0.379888	5.89671	6.22162	5.74708	0.277831	3.63806	3.3174	3.45471	0.726272	3.20822	-3.7438	-3.82053	-4.6045	0.878137	0.955515	0.841054	0.181395	0.0482774	0.10679	4.94784	0	linc00575	nr_024087	Gain
chr11	114068476	114069309	+	96	10	114068988	0.41407	2.88613	0.319307	0.272491	0.0879184	0.261173	4.58048	5.44851	5.35818	0.300984	4.43051	5.39077	4.39986	0.207506	3.36534	-3.39773	-3.62647	-5.25844	0.444749	0.695112	0.670991	0.396721	0.67974	0.386708	4.69783	0	nnmt	nm_006169	Gain
chr11	114037505	114037926	+	36	6	114037696	0.286664	1.32281	0.319307	0.317906	0.527511	0.142458	8.00268	8.5041	9.67928	0.0463052	8.53683	7.74059	8.08271	0.311259	5.74566	-4.16946	-4.1758	-3.4452	0.478012	0.565686	0.752428	0.571228	0.429972	0.492367	4.52886	0	zbtb16	nm_001018011	Gain
chr11	114024987	114025708	+	110	7	114025382	0.382219	3.42728	0.199567	0.499566	0.263755	0.522346	15.7948	13.0323	13.9572	0.324136	11.2023	12.2099	10.2664	0.207506	8.60285	-5.42987	-4.10607	-5.02754	0.87656	0.5992	0.698121	0.380913	0.50516	0.255037	5.57912	0	zbtb16	nm_001018011	Gain
chr11	114034488	114035136	+	68	8	114034881	0.445922	2.25479	0.279394	0.272491	0.307715	0.593575	19.9014	19.2171	19.0561	0.393594	15.0205	16.6331	14.7314	0.345844	11.7132	-5.3897	-5.42579	-5.2504	0.764731	0.714248	0.702113	0.358793	0.505914	0.330755	6.08233	0	zbtb16	nm_001018011	Gain
chr20	35571802	35572201	+	36	4	35571986	0.127406	1.17249	0.279394	0.136245	0.439592	0.332402	6.9497	7.06834	6.17919	0.277831	2.44939	3.08702	3.03102	0.311259	3.2911	-3.5582	-4.59429	-2.90433	1.07838	1.1028	0.908848	-0.426149	-0.0923535	-0.118767	4.71562	0	samhd1	nm_015474	Gain
chr11	114049741	114050646	+	249	8	114050118	0.541476	7.54603	0.159654	0.18166	0.263755	0.261173	10.214	10.0871	9.85213	0.254678	9.7255	9.67574	7.3657	0.311259	6.39169	-5.32318	-5.13688	-4.59893	0.676272	0.658244	0.624238	0.605576	0.598175	0.204625	5.67258	0	nnmt	nm_006169	Gain
