# Supplementary material for: PLZF targets developmental enhancers for activation during osteogenic differentiation of human mesenchymal stem cells
Source: eLife. 2019 Jan 23;8:e40364. doi: 10.7554/eLife.40364 (PMC6344081; doi:10.7554/eLife.40364)
Supplement: Supplementary file 8. [file elife-40364-supp8.xlsx]

## Sheet: PLZF-kd_2d_Diff_Vs_Ctrl_2d-diff
TranscriptId	Accn	LocusId	Symbol	GeneId	ContigAccn	Chromosome	Strand	Start	End	Transcript length	#exons	p-value	adj. p-value	log2(fold change)	Regulation	#reads treat1	#reads treat2	#reads treat3	#reads ctrl1	#reads ctrl2	#reads ctrl3	NE treat1	NE treat2	NE treat3	NE ctrl1	NE ctrl2	NE ctrl3	mean NE(treat)	stddev NE(treat)	mean NE(ctrl)	stddev NE(ctrl)
GXT_21913902	NM_001032409	GXL_103602	OAS1	4938	NC_000012	chr12	+	113344739	113357712	1565	6	6.42e-08	1.04e-06	-1.32	down	16	20	37	66	31	36	0.00536	0.00862	0.00798	0.02028	0.02273	0.0107	0.00732	0.00141	0.0179	0.00519
GXT_21913923	NM_001018100	GXL_4910	GRINL1A	81488	NC_000015	chr15	+	57884102	57977562	2398	13	0.000494	0.00363	-1.57	down	1	7	3	11	6	13	0.00022	0.00169	0.0003	0.00207	0.00256	0.00249	0.00074	0.00067	0.00237	0.00022
GXT_21913943	NM_001012631	GXL_316701	IL32	9235	NC_000016	chr16	+	3115313	3119668	1157	8	0.000127	0.0011	3.24	up	15	4	10	2	0	1	0.00452	0.00233	0.00281	0.00086	0	0.00043	0.00322	0.00094	0.00043	0.00035
GXT_21913949	NM_001012632	GXL_316701	IL32	9235	NC_000016	chr16	+	3115663	3119668	956	7	0.000358	0.00275	3.52	up	11	4	8	1	0	1	0.0041	0.00282	0.00265	0.00052	0	0.00052	0.00319	0.00065	0.00035	0.00025
GXT_21913976	NM_153021	GXL_42166	PLB1	151056	NC_000002	chr2	+	28718938	28866654	5148	58	0.000492	0.00361	-2.19	down	3	1	2	12	3	8	0.0002	0.00013	7e-05	0.00096	0.00072	0.00058	0.00013	5e-05	0.00075	0.00016
GXT_21914000	NM_001033031	GXL_119213	FAIM	55179	NC_000003	chr3	+	138327542	138352218	1157	6	8.62e-17	3.05e-15	-1.01	down	125	94	181	249	125	239	0.05193	0.05362	0.0544	0.10348	0.12736	0.10071	0.05332	0.00103	0.11052	0.01196
GXT_21914001	NM_001033032	GXL_119213	FAIM	55179	NC_000003	chr3	+	138327542	138352218	1097	5	8.62e-17	3.05e-15	-1.01	down	125	94	181	249	125	239	0.05477	0.05655	0.05738	0.10914	0.13433	0.10622	0.05623	0.00109	0.11656	0.01262
GXT_21914006	NM_001033030	GXL_119213	FAIM	55179	NC_000003	chr3	+	138327542	138352218	1531	6	2.82e-17	1.03e-15	-1.02	down	132	95	187	258	131	248	0.04145	0.04096	0.04253	0.08095	0.10106	0.07904	0.04165	0.00066	0.08702	0.00996
GXT_21914013	NM_001013442	GXL_316898	EPGN	255324	NC_000004	chr4	+	75174204	75179307	847	4	0.00442	0.0237	1.5	up	11	12	15	3	2	6	0.00681	0.00841	0.00509	0.00146	0.0029	0.00294	0.00677	0.00136	0.00243	0.00069
GXT_21914019	NM_000683	GXL_316892	ADRA2C	152	NC_000004	chr4	+	3768296	3770253	1958	1	1.39e-37	1.36e-35	-1.65	down	59	66	98	208	119	210	0.01581	0.02261	0.01808	0.05266	0.07457	0.05341	0.01883	0.00283	0.06021	0.01016
GXT_21914023	NM_001012761	GXL_6001	RGMB	285704	NC_000005	chr5	+	98104999	98132198	4580	5	8.62e-154	1.44e-150	1.71	up	2541	1938	3775	810	344	826	0.28799	0.28165	0.29482	0.08725	0.0914	0.08956	0.28815	0.00538	0.0894	0.0017
GXT_21914025	NM_001001669	GXL_27509	ARHGEF37	389337	NC_000005	chr5	+	148961135	149014527	4865	13	7.18e-25	3.96e-23	-1.39	down	44	43	63	120	60	131	0.00475	0.00582	0.00453	0.01182	0.01464	0.0132	0.00503	0.00056	0.01322	0.00115
GXT_21914077	NM_014638	GXL_316511	PLCH2	9651	NC_000001	chr1	+	2407754	2436964	4838	22	9.54e-06	0.000109	1.85	up	18	21	25	7	3	4	0.00184	0.00251	0.00171	0.00072	0.00036	0.00031	0.00202	0.00035	0.00046	0.00018
GXT_21914101	NM_001018053	GXL_121008	PFKFB2	5208	NC_000001	chr1	+	207226620	207254368	3529	15	0.00188	0.0115	-1.05	down	11	12	29	25	18	33	0.0014	0.0021	0.00266	0.00309	0.00522	0.00423	0.00205	0.00052	0.00418	0.00087
GXT_21914102	NM_001031740	GXL_316525	MANEAL	149175	NC_000001	chr1	+	38259774	38267278	2581	4	0.000194	0.0016	-1.35	down	6	8	22	20	14	31	0.00122	0.00209	0.00294	0.00384	0.00648	0.00599	0.00208	0.0007	0.00544	0.00115
GXT_21914139	NM_001024808	GXL_103746	BCL7A	605	NC_000012	chr12	+	122459861	122499950	3651	6	8.76e-23	4.38e-21	-1.39	down	63	42	58	142	59	152	0.00862	0.00776	0.00554	0.01888	0.0195	0.02033	0.00731	0.0013	0.01957	0.00059
GXT_21914179	NM_001012636	GXL_316701	IL32	9235	NC_000016	chr16	+	3115785	3119668	880	5	0.000959	0.00647	3.38	up	9	4	8	1	0	1	0.00387	0.00306	0.00287	0.00056	0	0.00057	0.00327	0.00043	0.00038	0.00027
GXT_21914182	NM_001012635	GXL_316701	IL32	9235	NC_000016	chr16	+	3115612	3119668	892	6	0.000358	0.00275	3.52	up	11	4	8	1	0	1	0.00441	0.00302	0.00284	0.00056	0	0.00056	0.00342	0.0007	0.00037	0.00026
GXT_21914218	NM_001034914	GXL_1230033	KCNIP3	30818	NC_000002	chr2	+	96012768	96051825	2721	8	2.72e-10	5.74e-09	-1.82	down	5	10	15	37	11	42	0.00096	0.00248	0.00199	0.00674	0.00496	0.0075	0.00181	0.00063	0.0064	0.00106
GXT_21914271	NM_013993	GXL_926176	DDR1	780	NC_000006	chr6	+	30852327	30867933	3861	19	1.49e-77	5.23e-75	-1.2	down	702	523	967	1641	693	1631	0.08948	0.08565	0.08596	0.19667	0.20491	0.19613	0.08703	0.00174	0.19924	0.00402
GXT_21914282	NM_001031692	GXL_826880	LRRC17	10234	NC_000007	chr7	+	102553344	102585558	2219	4	7.98e-05	0.000732	3.77	up	9	8	9	0	0	2	0.00214	0.00243	0.00147	0	0	0.00045	0.00201	0.0004	0.00015	0.00021
GXT_21914344	NM_001013642	GXL_316523	TRNP1	388610	NC_000001	chr1	+	27320195	27327377	1949	2	1.02e-82	4.02e-80	-1.34	down	604	473	882	1580	678	1641	0.16091	0.16194	0.16209	0.39945	0.4242	0.41599	0.16165	0.00052	0.41321	0.01029
GXT_21914360	NM_001030059	GXL_134226	PPAPDC1A	196051	NC_000010	chr10	+	122216466	122349367	1521	7	2.92e-40	3.21e-38	1.89	up	172	145	237	57	13	61	0.05366	0.06231	0.05313	0.01745	0.00969	0.01888	0.05637	0.00421	0.01534	0.00404
GXT_21914369	NM_001037290	GXL_1223647	SDHD	6392	NC_000011	chr11	+	112047089	112089652	2800	12	0.000243	0.00195	-1.91	down	7	0	3	15	4	11	0.001	0	0.00039	0.0023	0.00175	0.00196	0.00046	0.00041	0.002	0.00023
GXT_21914418	NM_001012634	GXL_316701	IL32	9235	NC_000016	chr16	+	3115639	3119668	897	6	0.000586	0.00422	3.45	up	10	4	8	1	0	1	0.00407	0.00301	0.00282	0.00055	0	0.00056	0.0033	0.00055	0.00037	0.00026
GXT_21914419	NM_004221	GXL_316701	IL32	9235	NC_000016	chr16	+	3115313	3119668	1090	7	0.000206	0.00169	3.19	up	14	4	10	2	0	1	0.00454	0.00247	0.00298	0.00091	0	0.00046	0.00333	0.00088	0.00046	0.00037
GXT_21914423	NM_001012633	GXL_316701	IL32	9235	NC_000016	chr16	+	3115313	3119668	919	8	0.000587	0.00422	3.45	up	12	3	7	1	0	1	0.00424	0.0022	0.00236	0.00054	0	0.00054	0.00293	0.00093	0.00036	0.00025
GXT_21914428	NM_001012718	GXL_316701	IL32	9235	NC_000016	chr16	+	3115313	3119668	1093	7	0.000127	0.0011	3.24	up	15	4	10	2	0	1	0.00501	0.00247	0.00298	0.00091	0	0.00046	0.00349	0.0011	0.00046	0.00037
GXT_21914458	NM_001025604	GXL_262453	ARRDC2	27106	NC_000019	chr19	+	18111944	18124911	2525	8	1.63e-51	2.69e-49	-1.08	down	1041	816	1476	2278	1029	2188	0.20731	0.20829	0.20422	0.42825	0.48029	0.41318	0.20661	0.00173	0.44057	0.02875
GXT_21914538	NM_001017971	GXL_5978	ATP6AP1L/FLJ41309	-2	NC_000005	chr5	+	81601166	81614147	758	4	0.0033	0.0185	-1.3	down	5	5	9	16	7	13	0.00346	0.00445	0.00381	0.0094	0.01134	0.00851	0.00391	0.00041	0.00975	0.00118
GXT_21914554	NM_001030060	GXL_316959	SAMD5	389432	NC_000006	chr6	+	147829828	147891157	6324	2	4.25e-112	3.18e-109	-2.43	down	43	33	58	226	96	258	0.00357	0.00352	0.00326	0.01748	0.01864	0.02032	0.00345	0.00014	0.01881	0.00117
GXT_21914642	NM_001018011	GXL_174014	ZBTB16	7704	NC_000011	chr11	+	113931288	114121398	2252	7	4.15e-82	1.6e-79	-2.19	down	59	47	95	288	121	312	0.01281	0.0136	0.01412	0.06172	0.06324	0.06554	0.01351	0.00054	0.0635	0.00157
GXT_21914746	NM_080628	GXL_132664	C20orf118	140711	NC_000020	chr20	+	35504570	35522632	2041	7	2.32e-47	3.27e-45	-1.97	down	59	32	73	228	82	195	0.01418	0.00995	0.01258	0.05355	0.04652	0.04581	0.01224	0.00174	0.04863	0.00349
GXT_21914807	NM_001025357	GXL_317009	C8orf85	441376	NC_000008	chr8	+	117950464	117956239	1786	2	2.19e-34	1.85e-32	-2.68	down	14	11	21	94	41	95	0.00382	0.00415	0.00425	0.0261	0.02817	0.02649	0.00407	0.00018	0.02692	0.0009
GXT_21914808	NM_001024372	GXL_67212	BAALC	79870	NC_000008	chr8	+	104152921	104242533	2682	2	3.31e-15	1.05e-13	1.38	up	65	94	130	38	15	38	0.01271	0.0234	0.01715	0.00701	0.00687	0.00695	0.01775	0.00438	0.00694	6e-05
GXT_21914883	NM_001033886	GXL_227906	CXCL12	6387	NC_000010	chr10	-	44871315	44880545	524	4	2.64e-58	5.35e-56	1.41	up	302	226	442	138	37	129	0.25188	0.23922	0.2664	0.1089	0.07498	0.10119	0.2525	0.0111	0.09502	0.01452
GXT_21914931	NM_001025433	GXL_133460	NQO1	1728	NC_000016	chr16	-	69743304	69760533	2489	5	1.18e-58	2.4e-56	-1.04	down	2354	1644	3358	4980	1981	4968	0.4682	0.42685	0.46081	0.94173	0.92355	0.94443	0.45195	0.01801	0.93657	0.00927
GXT_21914932	NM_001025434	GXL_133460	NQO1	1728	NC_000016	chr16	-	69743304	69760533	2477	5	1.64e-60	3.54e-58	-1.05	down	2269	1574	3211	4786	1923	4791	0.45432	0.4105	0.44359	0.91038	0.89679	0.91608	0.43614	0.01865	0.90775	0.00809
GXT_21914969	NM_012340	GXL_925584	NFATC2	4773	NC_000020	chr20	-	50007765	50159258	3254	11	3.97e-07	5.77e-06	2.35	up	20	15	30	6	1	4	0.00306	0.0029	0.00307	0.00091	0.00038	0.00061	0.00301	8e-05	0.00063	0.00022
GXT_21914993	NM_001017973	GXL_103335	P4HA2	8974	NC_000005	chr5	-	131528303	131562935	2566	15	5.19e-87	2.25e-84	1.03	up	2619	2195	4021	1394	567	1507	0.47168	0.50648	0.49538	0.23417	0.23696	0.25684	0.49118	0.01451	0.24266	0.01009
GXT_21914998	NM_021147	GXL_159271	CCNO	10309	NC_000005	chr5	-	54526980	54529508	1433	3	0.00195	0.0118	-1.25	down	7	6	5	11	7	18	0.0022	0.00282	0.00126	0.00381	0.006	0.00602	0.00209	0.00064	0.00528	0.00104
GXT_21915065	NM_006934	GXL_316527	SLC6A9	6536	NC_000001	chr1	-	44462155	44482997	3214	13	1e-08	1.78e-07	1.06	up	102	82	122	51	18	54	0.01567	0.01616	0.01282	0.00732	0.00688	0.0079	0.01488	0.00147	0.00737	0.00042
GXT_21915152	NM_002842	GXL_73911	PTPRH	5794	NC_000019	chr19	-	55692615	55720874	3927	20	0.00107	0.00712	2	up	12	17	16	6	0	6	0.00147	0.00275	0.00129	0.00076	0	0.00076	0.00184	0.00065	0.00051	0.00036
GXT_21915174	NM_001029864	GXL_122652	KIAA1755	85449	NC_000020	chr20	-	36838907	36889174	6412	14	7.31e-20	3.07e-18	1.23	up	150	130	227	81	23	77	0.01153	0.01319	0.01236	0.0058	0.00421	0.00595	0.01236	0.00068	0.00532	0.00079
GXT_21915206	NM_001037582	GXL_220918	SCD5	79966	NC_000004	chr4	-	83550690	83720010	3103	5	1.17e-25	6.75e-24	-1.05	down	177	115	201	349	140	330	0.02848	0.02357	0.02271	0.05337	0.05342	0.0512	0.02492	0.00254	0.05266	0.00103
GXT_21915216	NM_001017974	GXL_103335	P4HA2	8974	NC_000005	chr5	-	131528303	131563556	2094	15	1.21e-89	5.66e-87	1.02	up	2573	2152	3913	1372	559	1477	0.56367	0.60482	0.5874	0.28041	0.28463	0.30695	0.5853	0.01687	0.29066	0.01164
GXT_21915244	NM_007257	GXL_29819	PNMA2	10687	NC_000008	chr8	-	26362196	26371483	4846	3	6.1e-104	3.9e-101	-1.14	down	541	410	862	1281	537	1284	0.05825	0.05591	0.06396	0.12981	0.13504	0.1306	0.05937	0.00338	0.13182	0.0023
GXT_21915284	NM_201649	GXL_316527	SLC6A9	6536	NC_000001	chr1	-	44462155	44482997	3376	14	1e-08	1.78e-07	1.06	up	102	82	122	51	18	54	0.01492	0.01539	0.0122	0.00697	0.00655	0.00752	0.01417	0.00141	0.00701	0.0004
GXT_21915320	NM_006434	GXL_197067	SORBS1	10580	NC_000010	chr10	-	97071530	97200937	5386	21	1.66e-107	1.12e-104	-2.33	down	48	33	64	272	87	233	0.00435	0.00376	0.00398	0.02338	0.01915	0.01965	0.00403	0.00024	0.02073	0.00189
GXT_21915321	NM_001034954	GXL_197067	SORBS1	10580	NC_000010	chr10	-	97071530	97200937	7210	31	1.09e-97	6.18e-95	-2.28	down	54	38	67	281	94	260	0.00363	0.00327	0.00311	0.01808	0.01541	0.01637	0.00334	0.00022	0.01662	0.0011
GXT_21915342	NR_002312	GXL_316651	RPPH1	85495	NC_000014	chr14	-	20811230	20811570	341	1	6.13e-08	9.95e-07	-1.7	down	6	7	3	49	2	5	0.00923	0.01384	0.00318	0.07128	0.0072	0.0073	0.00875	0.00437	0.02859	0.03018
GXT_21915376	NM_001032278	GXL_36780	MMP28	79148	NC_000017	chr17	-	34105509	34122640	1021	3	0.0032	0.018	-1.06	down	17	8	31	35	20	23	0.00873	0.00528	0.01038	0.01628	0.02214	0.01122	0.00813	0.00212	0.01655	0.00446
GXT_21915463	NM_001034850	GXL_159325	FAM134B	54463	NC_000005	chr5	-	16473147	16617118	3235	9	0.00206	0.0124	-1.16	down	5	5	8	16	3	17	0.00082	0.00104	0.0009	0.0023	0.00114	0.00246	0.00092	9e-05	0.00197	0.00059
GXT_21915467	NM_197941	GXL_159515	ADAMTS6	11174	NC_000005	chr5	-	64444563	64777704	7268	25	1.15e-64	2.82e-62	1.89	up	295	229	406	93	27	90	0.02028	0.02	0.01884	0.00628	0.00438	0.00606	0.01971	0.00062	0.00557	0.00085
GXT_21915490	NM_001018041	GXL_190657	EPM2A	7957	NC_000006	chr6	-	145946440	146056991	1704	5	0.000585	0.00421	-1.24	down	12	6	15	19	12	27	0.00369	0.00237	0.00318	0.00524	0.00822	0.0076	0.00308	0.00054	0.00702	0.00128
GXT_21915550	NM_001013632	GXL_316528	TCTEX1D4	343521	NC_000001	chr1	-	45271590	45272957	1260	2	0.0101	0.0467	1.13	up	24	18	24	10	2	16	0.00999	0.00963	0.00688	0.00394	0.00195	0.00607	0.00883	0.00139	0.00399	0.00168
GXT_21915562	NM_001018016	GXL_1227395	MUC1/KRTCAP2	-2	NC_000001	chr1	-	155158300	155162706	1178	8	3.64e-18	1.4e-16	-1.01	down	106	80	138	226	86	216	0.04319	0.04093	0.03984	0.08922	0.08338	0.08372	0.04132	0.0014	0.08544	0.00268
GXT_21915568	NM_001033044	GXL_151294	GLUL	2752	NC_000001	chr1	-	182350839	182361341	4364	7	3.18e-112	2.4e-109	-1.5	down	2082	1522	3043	6140	2600	5958	0.24071	0.22598	0.24162	0.67071	0.70257	0.65299	0.2361	0.00717	0.67542	0.02051
GXT_21915570	NM_001033056	GXL_151294	GLUL	2752	NC_000001	chr1	-	182350839	182360539	4066	7	6.21e-116	4.94e-113	-1.51	down	2032	1480	2978	6044	2538	5826	0.25196	0.23568	0.25361	0.70866	0.73518	0.68511	0.24708	0.00809	0.70965	0.02045
GXT_21915574	NM_001034956	GXL_197067	SORBS1	10580	NC_000010	chr10	-	97071530	97200937	6049	28	1.52e-102	9.52e-100	-2.31	down	51	35	65	276	90	246	0.0041	0.00357	0.00358	0.02115	0.01766	0.01839	0.00375	0.00025	0.01907	0.0015
GXT_21915575	NM_024991	GXL_197067	SORBS1	10580	NC_000010	chr10	-	97071530	97321171	5858	26	7.72e-102	4.72e-99	-2.32	down	52	35	65	277	93	245	0.00424	0.00368	0.00372	0.02183	0.01874	0.01895	0.00388	0.00026	0.01984	0.00141
GXT_21915576	NM_001034957	GXL_197067	SORBS1	10580	NC_000010	chr10	-	97071530	97200937	5554	22	8.02e-104	5.11e-101	-2.32	down	50	35	64	274	90	241	0.00437	0.00388	0.00386	0.02285	0.01923	0.01972	0.00404	0.00024	0.0206	0.0016
GXT_21915584	NM_052889	GXL_161291	CARD16	114769	NC_000011	chr11	-	104912053	104916051	758	4	0.00265	0.0153	-1.34	down	5	5	4	14	5	12	0.00346	0.00445	0.00191	0.0085	0.00648	0.00723	0.00327	0.00105	0.0074	0.00083
GXT_21915688	NM_173359	GXL_171103	EIF4E3	317649	NC_000003	chr3	-	71728440	71803924	6170	8	1.94e-08	3.32e-07	-1.02	down	46	34	77	87	50	99	0.0037	0.00355	0.00445	0.00667	0.00975	0.00775	0.0039	0.00039	0.00806	0.00128
GXT_21915728	NM_002192	GXL_926281	INHBA	3624	NC_000007	chr7	-	41728601	41742706	2175	3	5.51e-86	2.31e-83	1.14	up	1289	1002	1866	625	248	630	0.30674	0.3087	0.3075	0.14107	0.13943	0.14147	0.30765	0.00081	0.14066	0.00088
GXT_21915777	AK223570	GXL_47031	ACOT11	26027	NC_000001	chr1	+	55013901	55074883	1965	16	1.96e-05	0.000209	-1.06	down	23	18	39	45	26	53	0.00561	0.00549	0.00662	0.00984	0.01399	0.01217	0.00591	0.00051	0.012	0.0017
GXT_21915802	AK223166	GXL_120988	FMO3	2328	NC_000001	chr1	+	171060026	171086959	2079	9	2.7e-12	6.81e-11	-1.67	down	15	12	34	71	24	52	0.00353	0.00389	0.00573	0.01574	0.0136	0.01174	0.00438	0.00096	0.01369	0.00163
GXT_21915852	AK223367	GXL_248992	SNCG	6623	NC_000010	chr10	+	88718331	88722916	682	5	0.000552	0.004	-1.17	down	10	4	12	24	4	22	0.00692	0.00395	0.00583	0.01599	0.0054	0.01461	0.00557	0.00123	0.012	0.0047
GXT_21915941	AK223006	GXL_103602	OAS1	4938	NC_000012	chr12	+	113344823	113355572	1127	5	4.29e-05	0.000421	-1.2	down	16	15	32	48	26	28	0.00745	0.00897	0.00948	0.02024	0.02612	0.0113	0.00863	0.00086	0.01922	0.00609
GXT_21916117	AK002203	GXL_57953	NOSTRIN	115677	NC_000002	chr2	+	169659128	169721564	1635	16	0.0105	0.0481	-1.22	down	3	7	8	12	8	12	0.00096	0.00206	0.00155	0.00334	0.00451	0.00305	0.00152	0.00045	0.00363	0.00063
GXT_21916143	AK223075	GXL_42046	KHK	3795	NC_000002	chr2	+	27310094	27322837	1150	8	0.000532	0.00387	-1.83	down	4	2	8	14	8	12	0.00182	0.00117	0.00236	0.0056	0.00854	0.0052	0.00178	0.00049	0.00645	0.00149
GXT_21916206	AK223528	GXL_193541	PPARG	5468	NC_000003	chr3	+	12421200	12475678	1473	6	8.42e-37	7.99e-35	-1.28	down	105	54	112	195	105	196	0.03456	0.02426	0.02674	0.0621	0.08142	0.06202	0.02852	0.00439	0.06851	0.00913
GXT_21916315	AK223435	GXL_42336	NRG1	3084	NC_000008	chr8	+	32504744	32600593	1691	3	1.35e-05	0.000149	1.53	up	18	14	38	6	4	7	0.00449	0.00496	0.0073	0.00176	0.00172	0.00196	0.00558	0.00123	0.00181	0.0001
GXT_21916339	AK223499	GXL_16180	MAOA	4128	NC_000023	chrX	+	43515413	43604002	2003	15	3.82e-89	1.77e-86	-2.47	down	58	43	96	318	159	350	0.01348	0.01347	0.01587	0.07053	0.08581	0.07634	0.01427	0.00113	0.07756	0.0063
GXT_21916471	AK223503	GXL_161263	CASP1	834	NC_000011	chr11	-	104896697	104905876	1539	9	0.000104	0.000925	-1.41	down	10	7	17	25	15	25	0.00341	0.00263	0.00352	0.00677	0.00957	0.00647	0.00319	0.0004	0.0076	0.0014
GXT_21916484	AK223165	GXL_41671	LPXN	9404	NC_000011	chr11	-	58294353	58343329	1819	9	4.42e-09	8.14e-08	1.2	up	69	57	124	39	9	44	0.01846	0.01926	0.02245	0.00994	0.00607	0.01123	0.02006	0.00172	0.00908	0.00219
GXT_21916493	AK223036	GXL_161196	MMP1	4312	NC_000011	chr11	-	102660641	102667850	1519	8	0.00676	0.0337	Inf	up	4	2	3	0	0	0	0.00091	0.00089	0.00071	0	0	0	0.00084	9e-05	0	0
GXT_21916495	AK223034	GXL_161196	MMP1	4312	NC_000011	chr11	-	102660645	102668101	1673	9	0.00394	0.0215	Inf	up	4	2	4	0	0	0	0.00083	0.00081	0.00086	0	0	0	0.00083	2e-05	0	0
GXT_21916506	AK222710	GXL_161211	SYTL2	54843	NC_000011	chr11	-	85406000	85426180	2058	9	2e-07	3.04e-06	1.19	up	75	38	72	25	10	31	0.01759	0.01147	0.01203	0.00602	0.00597	0.00688	0.0137	0.00276	0.00629	0.00042
GXT_21916507	AK222707	GXL_161211	SYTL2	54843	NC_000011	chr11	-	85405850	85426180	2208	9	7.69e-08	1.23e-06	1.15	up	83	42	79	27	12	35	0.01829	0.01191	0.01236	0.00606	0.00667	0.00732	0.01419	0.00291	0.00668	0.00051
GXT_21916514	AK222540	GXL_161366	UCP2	7351	NC_000011	chr11	-	73685743	73693888	1618	8	7.99e-14	2.29e-12	-1.8	down	16	8	12	45	14	48	0.00519	0.00292	0.00268	0.01287	0.01062	0.01355	0.0036	0.00113	0.01235	0.00125
GXT_21916532	AK223022	GXL_193932	TSPAN8	7103	NC_000012	chr12	-	71518877	71551565	1058	8	6.19e-06	7.34e-05	-1.62	down	14	5	5	22	13	24	0.00645	0.00255	0.00171	0.00937	0.01276	0.00989	0.00357	0.00207	0.01067	0.00149
GXT_21916563	AK223610	GXL_155959	SLC7A8	23428	NC_000014	chr14	-	23596282	23652869	2458	11	3.67e-36	3.38e-34	-1.57	down	94	54	131	277	114	241	0.01836	0.01398	0.01808	0.05224	0.05245	0.04517	0.01681	0.002	0.04995	0.00338
GXT_21916603	AK223050	GXL_133460	NQO1	1728	NC_000016	chr16	-	69744744	69760445	1063	6	1.79e-59	3.73e-57	-1.01	down	2039	1428	2901	4219	1713	4156	0.92911	0.85253	0.91322	1.82975	1.82247	1.81112	0.89829	0.033	1.82111	0.00767
GXT_21916615	AK223560	GXL_36865	MPP2	4355	NC_000017	chr17	-	41955093	41984904	1837	13	9.91e-08	1.57e-06	1.02	up	67	38	98	28	15	31	0.01656	0.01211	0.01601	0.00675	0.00802	0.00759	0.01489	0.00198	0.00745	0.00053
GXT_21916752	AK223481	GXL_925864	CPOX/CLDND1	-2	NC_000003	chr3	-	98299214	98312385	1714	7	7.73e-34	6.39e-32	-1.18	down	94	71	144	243	85	235	0.02744	0.02748	0.02805	0.0672	0.05708	0.0661	0.02766	0.00028	0.06346	0.00453
GXT_21916764	AK222893	GXL_171119	MST1	4485	NC_000003	chr3	-	49721388	49726087	2214	18	0.00505	0.0265	-1.01	down	11	8	21	25	12	22	0.00237	0.00244	0.00343	0.00537	0.00553	0.00495	0.00275	0.00048	0.00528	0.00024
GXT_21916788	AK222986	GXL_925980	HPSE	10855	NC_000004	chr4	-	84216475	84256000	1719	12	1.82e-06	2.39e-05	-1.51	down	7	14	12	26	19	29	0.00183	0.0051	0.00252	0.00635	0.01214	0.00782	0.00315	0.00141	0.00877	0.00246
GXT_21916816	AK222688	GXL_103170	HBEGF	1839	NC_000005	chr5	-	139712801	139726188	1300	7	8.96e-29	5.99e-27	1.68	up	74	72	129	23	13	30	0.02905	0.03527	0.03296	0.00879	0.01228	0.01149	0.03243	0.00257	0.01085	0.00149
GXT_21916863	AK222588	GXL_43516	IER3	8870	NC_000006	chr6	-	30711021	30712324	1192	2	9.64e-151	1.42e-147	1.46	up	828	761	1293	346	144	346	0.36192	0.42708	0.38839	0.14351	0.14832	0.1429	0.39246	0.02676	0.14491	0.00242
GXT_21916878	AK223328	GXL_97699	PDK4	5166	NC_000007	chr7	-	95214792	95225819	1611	11	3.66e-15	1.16e-13	-2.12	down	8	6	9	28	10	49	0.00261	0.00251	0.00202	0.00831	0.00762	0.01268	0.00238	0.00026	0.00954	0.00224
GXT_21916885	AK222999	GXL_97742	FGL2	10875	NC_000007	chr7	-	76825431	76829118	1493	2	1.48e-61	3.29e-59	-1.55	down	115	79	164	368	116	374	0.0397	0.03569	0.03967	0.12121	0.09375	0.12311	0.03835	0.00188	0.11269	0.01342
GXT_21916893	AK222742	GXL_926281	INHBA	3624	NC_000007	chr7	-	41729151	41740048	1454	2	2.95e-56	5.6e-54	1.18	up	946	725	1364	430	181	446	0.33659	0.33344	0.33621	0.14458	0.15199	0.14935	0.33541	0.0014	0.14864	0.00307
GXT_22015961	AK127209	GXL_664106	MRVI1	10335	NC_000011	chr11	-	10597307	10673732	3146	19	3.48e-62	7.93e-60	-1.06	down	381	273	547	850	328	802	0.05755	0.05345	0.05707	0.12012	0.11566	0.11394	0.05602	0.00183	0.11657	0.0026
GXT_22015969	AK126971	GXL_193744	PPFIA2	8499	NC_000012	chr12	-	81652656	82152432	4712	30	0.00752	0.0368	-1.21	down	11	2	17	20	10	17	0.00111	0.00029	0.00123	0.00189	0.00261	0.00169	0.00088	0.00042	0.00206	0.0004
GXT_22016109	AK127932	GXL_383762	ZC3H12D	340152	NC_000006	chr6	-	149770870	149806030	2385	7	6.15e-15	1.91e-13	-2.23	down	6	9	11	39	22	33	0.00132	0.00208	0.00167	0.0081	0.0103	0.00668	0.00169	0.00031	0.00836	0.00149
GXT_22016139	AK126267	GXL_12636	PNPLA7	375775	NC_000009	chr9	-	140403260	140444836	2363	14	0.00778	0.0379	-1.13	down	4	6	8	14	5	14	0.00089	0.00171	0.00122	0.00244	0.0026	0.00253	0.00127	0.00034	0.00252	7e-05
GXT_22016182	AK095538	GXL_380378	ACBD7	414149	NC_000010	chr10	-	15117475	15130775	2381	5	0.000452	0.00336	-1.68	down	4	4	4	12	6	14	0.00088	0.00113	0.00061	0.00229	0.00309	0.00272	0.00087	0.00021	0.0027	0.00033
GXT_22016290	AK122705	GXL_72352	FAM178B	51252	NC_000002	chr2	-	97541620	97617238	1563	11	0.00823	0.0396	-1.85	down	2	2	2	9	4	4	0.00067	0.00043	0.00046	0.00254	0.00314	0.00109	0.00052	0.00011	0.00226	0.00086
GXT_22016371	AK098053	GXL_29825	HR	55806	NC_000008	chr8	-	21972582	21975958	2394	3	8.83e-15	2.71e-13	-2.33	down	6	9	10	29	22	49	0.00131	0.00253	0.00151	0.00601	0.01101	0.01013	0.00178	0.00053	0.00905	0.00218
GXT_22016500	AK055386	GXL_128424	AK055386	0	NC_000020	chr20	-	47980416	47983826	2679	3	2.5e-75	8.17e-73	-2.67	down	21	14	21	120	44	135	0.00411	0.00353	0.00283	0.0222	0.02016	0.02509	0.00349	0.00052	0.02248	0.00202
GXT_22016572	AK023368	GXL_384630	MED14	9282	NC_000023	chrX	-	40510531	40572219	1811	10	1.64e-19	6.73e-18	-1.16	down	89	72	149	194	103	228	0.02317	0.02569	0.02693	0.04817	0.06343	0.05653	0.02526	0.00156	0.05604	0.00624
GXT_22016714	AK024971	GXL_249634	ENSG00000233360	0	NC_000022	chr22	-	38035694	38052045	1927	18	0.0095	0.0445	1.02	up	16	15	30	7	3	15	0.00436	0.0046	0.00538	0.0018	0.00168	0.00362	0.00478	0.00044	0.00237	0.00089
GXT_22016790	AK125665	GXL_228206	AK091279	0	NC_000001	chr1	+	110912170	110915625	3456	1	0.00241	0.0142	-1.1	down	11	6	13	15	9	26	0.00167	0.00117	0.00136	0.00215	0.0032	0.00375	0.0014	0.00021	0.00303	0.00066
GXT_22016835	AK128740	GXL_230287	IL16	3603	NC_000015	chr15	+	81571897	81598889	3764	12	8.51e-16	2.81e-14	-1.22	down	45	28	43	85	35	104	0.00627	0.00438	0.00394	0.01049	0.01109	0.0135	0.00486	0.00101	0.01169	0.0013
GXT_22016839	AK131550	GXL_98576	GPR56	9289	NC_000016	chr16	+	57684162	57698937	3055	12	0.000597	0.00428	1.89	up	11	6	13	2	2	1	0.00172	0.00122	0.00154	0.00032	0.0008	0.00016	0.00149	0.00021	0.00043	0.00027
GXT_22016841	AK128711	GXL_89821	WFDC1	58189	NC_000016	chr16	+	84359270	84363446	4159	2	2.87e-33	2.33e-31	-2.17	down	19	16	39	94	33	143	0.00215	0.0026	0.00304	0.01062	0.00974	0.0162	0.0026	0.00036	0.01219	0.00286
GXT_22016897	AK127693	GXL_128243	PLCB1	23236	NC_000020	chr20	+	8581381	8769170	2988	26	8.95e-17	3.17e-15	-1.62	down	32	13	46	82	38	86	0.00474	0.00256	0.00447	0.01162	0.01356	0.01249	0.00392	0.00097	0.01256	0.00079
GXT_22016943	AK128170	GXL_1235853	SUN1/GET4	-2	NC_000007	chr7	+	907767	914539	3434	4	4.64e-49	7.1e-47	-1.08	down	493	338	682	993	431	1079	0.07328	0.06563	0.06994	0.14056	0.15138	0.15374	0.06962	0.00313	0.14856	0.00574
GXT_22016945	AK127838	GXL_49454	MGAM	8972	NC_000007	chr7	+	141788232	141806546	4855	8	0.00551	0.0285	1.24	up	11	10	18	5	3	4	0.00108	0.00139	0.00134	0.00051	0.00076	0.00041	0.00127	0.00014	0.00056	0.00015
GXT_22016961	AK124297	GXL_1237350	TACC1	6867	NC_000008	chr8	+	38602410	38605565	3156	1	3.17e-31	2.37e-29	-2.14	down	27	14	29	102	41	102	0.00449	0.00299	0.00332	0.01603	0.01595	0.0161	0.0036	0.00064	0.01603	6e-05
GXT_22016993	AK095631	GXL_693005	KAZN	23254	NC_000001	chr1	+	15436442	15439940	3216	2	0.00823	0.0396	#NAME?	down	0	0	0	2	1	3	0	0	0	0.00025	0.00038	0.00046	0	0	0.00036	9e-05
GXT_22017017	AK075060	GXL_141628	OTOGL	283310	NC_000012	chr12	+	80761431	80772855	1668	6	3.28e-05	0.000332	1.13	up	34	23	63	23	6	14	0.00975	0.00889	0.01321	0.00624	0.00442	0.00418	0.01062	0.00187	0.00495	0.00092
GXT_22017019	AK074545	GXL_1224090	FAM101A	144347	NC_000012	chr12	+	124779212	124800568	1930	7	2.25e-55	4.07e-53	1.63	up	331	261	474	132	41	109	0.08761	0.08862	0.08668	0.03168	0.02446	0.02812	0.08764	0.00079	0.02809	0.00295
GXT_22017030	AK091422	GXL_40604	FRY	10129	NC_000013	chr13	+	32813998	32870750	3556	17	5.79e-38	5.78e-36	-1.3	down	76	61	119	199	97	181	0.01092	0.01062	0.01087	0.02585	0.03073	0.024	0.0108	0.00013	0.02686	0.00284
GXT_22017044	AK075270	GXL_98576	GPR56	9289	NC_000016	chr16	+	57684162	57698934	3542	13	7.14e-05	0.000662	2.2	up	13	9	14	2	2	1	0.00178	0.00152	0.00143	0.00028	0.00069	0.00014	0.00158	0.00015	0.00037	0.00023
GXT_22017057	AK096052	GXL_102667	WNK4	65266	NC_000017	chr17	+	40935627	40948564	2085	14	3.18e-05	0.000322	1.93	up	20	12	29	7	1	6	0.00464	0.00356	0.00442	0.00119	0.00059	0.00119	0.00421	0.00047	0.00099	0.00028
GXT_22017085	AK093444	GXL_57953	NOSTRIN	115677	NC_000002	chr2	+	169643049	169721565	2536	21	0.0105	0.0481	-1.22	down	3	7	8	12	8	12	0.00062	0.00133	0.001	0.00215	0.0029	0.00196	0.00098	0.00029	0.00234	0.00041
GXT_22017158	AK091912	GXL_184925	AIF1L	83543	NC_000009	chr9	+	133971924	133998530	3344	6	0.0105	0.0483	-2	down	2	1	1	6	2	6	0.00031	0.0002	0.00011	0.0007	0.00051	0.00062	0.00021	8e-05	0.00061	8e-05
GXT_22017198	AK027872	GXL_380601	MICALCL	84953	NC_000011	chr11	+	12315370	12380691	2363	7	2.33e-05	0.000244	1.6	up	29	18	36	8	2	14	0.00622	0.00485	0.00535	0.00167	0.00104	0.00295	0.00547	0.00057	0.00189	0.00079
GXT_22017207	AK091099	GXL_664132	C13orf15	28984	NC_000013	chr13	+	42042342	42045005	2641	2	1.94e-290	2.88e-286	-2.07	down	162	128	298	827	315	772	0.03096	0.03064	0.03758	0.14575	0.13926	0.1344	0.03306	0.0032	0.1398	0.00465
GXT_22017370	AK130268	GXL_379926	ENSG00000238290	0	NC_000001	chr1	+	8086798	8182763	2085	4	0.000778	0.00539	-2.65	down	1	0	5	7	5	10	0.00025	0	0.00087	0.00166	0.00292	0.00213	0.00037	0.00037	0.00224	0.00052
GXT_22017417	AK026919	GXL_4949	DISP2	85455	NC_000015	chr15	+	40661537	40792845	2052	3	0.000721	0.00505	-1.22	down	4	7	9	19	4	19	0.00102	0.0023	0.00158	0.00459	0.00239	0.00461	0.00163	0.00052	0.00386	0.00104
GXT_22017491	AK074227	GXL_27406	CCDC99	54908	NC_000005	chr5	+	169020356	169031770	2043	9	1.51e-40	1.68e-38	1.16	up	453	345	665	182	91	239	0.10933	0.1081	0.10924	0.04143	0.05194	0.05642	0.10889	0.00056	0.04993	0.00628
GXT_22017693	NM_001034955	GXL_197067	SORBS1	10580	NC_000010	chr10	-	97071530	97144044	5318	18	2.86e-125	2.77e-122	-2.42	down	40	31	51	241	79	221	0.00385	0.00368	0.0033	0.02138	0.01787	0.01891	0.00361	0.00023	0.01939	0.00147
GXT_22018366	NM_001039845	GXL_88985	MDH1B	130752	NC_000002	chr2	-	207602487	207630050	2332	12	0.00234	0.0138	-1.76	down	6	1	5	16	7	5	0.00135	0.00029	0.00077	0.00298	0.00369	0.00107	0.0008	0.00043	0.00258	0.00111
GXT_22018488	NM_005873	GXL_382658	RGS19	10287	NC_000020	chr20	-	62704534	62710845	1593	6	3.34e-18	1.28e-16	-1.04	down	124	85	153	239	109	233	0.03902	0.03386	0.03329	0.07251	0.08219	0.0683	0.03539	0.00258	0.07433	0.00582
GXT_22018489	NM_001039467	GXL_382658	RGS19	10287	NC_000020	chr20	-	62704534	62711324	1493	6	3.07e-17	1.12e-15	-1.02	down	125	85	157	239	109	232	0.0418	0.03613	0.03629	0.07737	0.08717	0.07255	0.03807	0.00264	0.07903	0.00608
GXT_22018869	NM_002612	GXL_97699	PDK4	5166	NC_000007	chr7	-	95212809	95225925	3700	11	1.49e-34	1.27e-32	-2.08	down	20	14	26	88	28	95	0.00284	0.00255	0.00254	0.01166	0.00929	0.01171	0.00264	0.00014	0.01089	0.00113
GXT_22020140	NM_001039523	GXL_241273	CHRNA1	1134	NC_000002	chr2	-	175612320	175629200	2059	10	0.00145	0.00923	Inf	up	6	5	2	0	0	0	0.00153	0.00164	0.00035	0	0	0	0.00117	0.00058	0	0
GXT_22020372	NM_001012410	GXL_13786	SGOL1	151648	NC_000003	chr3	-	20202085	20227698	2353	9	0.00207	0.0124	1.15	up	24	20	35	16	3	12	0.0049	0.00573	0.00507	0.00337	0.00157	0.00233	0.00523	0.00036	0.00242	0.00074
GXT_22020439	NM_001040021	GXL_103359	CD14	929	NC_000005	chr5	-	140011313	140013286	1548	3	1.74e-10	3.75e-09	-1.15	down	36	19	55	83	29	77	0.01185	0.00828	0.01283	0.02626	0.023	0.02445	0.01099	0.00196	0.02457	0.00133
GXT_22021004	NM_001038633	GXL_218371	RSPO1	284654	NC_000001	chr1	-	38076951	38100491	2985	9	9.52e-62	2.14e-59	-2.98	down	22	14	23	146	73	144	0.00387	0.00294	0.00278	0.02375	0.02879	0.02336	0.0032	0.00048	0.0253	0.00247
GXT_22022105	NR_002767	GXL_383704	NCRNA00120	55389	NC_000006	chr6	-	88410020	88410933	914	1	0.00125	0.00812	-1.45	down	3	4	7	12	4	16	0.00172	0.00295	0.00277	0.00651	0.00537	0.00872	0.00248	0.00054	0.00687	0.00139
GXT_22022163	NR_002722	GXL_383603	ZNF204P	7754	NC_000006	chr6	-	27325602	27339304	4009	4	0.00385	0.0211	-1.6	down	6	1	7	9	6	15	0.00079	0.00017	0.00063	0.00111	0.00184	0.00174	0.00053	0.00026	0.00156	0.00032
GXT_22022912	NM_004616	GXL_193932	TSPAN8	7103	NC_000012	chr12	-	71518877	71551779	1130	9	1.95e-06	2.55e-05	-1.68	down	14	5	5	25	13	24	0.00604	0.00239	0.0016	0.01009	0.01195	0.00926	0.00334	0.00193	0.01043	0.00112
GXT_22023517	NM_001012412	GXL_13786	SGOL1	151648	NC_000003	chr3	-	20202085	20227698	1597	9	0.0033	0.0185	1.32	up	17	14	24	8	2	9	0.00493	0.00591	0.00498	0.00248	0.00154	0.0025	0.00527	0.00045	0.00217	0.00045
GXT_22025143	NM_138484	GXL_13786	SGOL1	151648	NC_000003	chr3	-	20202085	20227698	1546	8	0.00439	0.0235	1.3	up	16	14	24	8	2	9	0.0049	0.00611	0.00514	0.00257	0.00159	0.00258	0.00538	0.00052	0.00225	0.00046
GXT_22025725	NM_000425	GXL_1239890	ARHGAP4	393	NC_000023	chrX	-	153126971	153141399	5029	28	0.00476	0.0252	-3.36	down	0	1	0	4	3	3	0	5e-05	0	0.00039	0.00049	0.0002	2e-05	2e-05	0.00036	0.00012
GXT_22026164	NM_001423	GXL_380839	EMP1	2012	NC_000012	chr12	+	13349602	13369708	2804	5	5.36e-94	2.78e-91	-1.3	down	9397	7531	14970	24786	10688	25880	1.73014	1.76829	1.89401	4.29833	4.58628	4.49997	1.79748	0.07001	4.46153	0.12066
GXT_22026344	NM_005682	GXL_98576	GPR56	9289	NC_000016	chr16	+	57684162	57698944	3570	13	7.14e-05	0.000662	2.2	up	13	9	14	2	2	1	0.00176	0.00151	0.00142	0.00028	0.00069	0.00014	0.00156	0.00014	0.00037	0.00023
GXT_22026347	NM_201524	GXL_98576	GPR56	9289	NC_000016	chr16	+	57684162	57698944	3552	13	7.14e-05	0.000662	2.2	up	13	9	14	2	2	1	0.00177	0.00152	0.00142	0.00028	0.00069	0.00014	0.00157	0.00015	0.00037	0.00023
GXT_22026728	NM_015192	GXL_128243	PLCB1	23236	NC_000020	chr20	+	8113296	8865547	6705	32	1.17e-45	1.55e-43	-1.99	down	55	25	71	169	89	186	0.00391	0.00229	0.00331	0.01138	0.01501	0.01275	0.00317	0.00067	0.01305	0.0015
GXT_22026843	XM_933903	GXL_382986	LOC644662	644662	NC_000003	chr3	+	125985645	126010368	741	3	0.00477	0.0252	-3.21	down	0	1	0	6	2	2	0	0.00091	0	0.00401	0.00331	0.00134	0.0003	0.00043	0.00289	0.00113
GXT_22026875	NM_007335	GXL_193447	DLEC1	9940	NC_000003	chr3	+	38080696	38164228	5616	37	0.00964	0.045	-1.3	down	5	2	4	10	2	12	0.00028	0.00024	0.00019	0.00079	0.00043	0.00092	0.00024	4e-05	0.00071	0.00021
GXT_22027196	NM_001040167	GXL_35115	LFNG	3955	NC_000007	chr7	+	2559479	2568063	2374	8	5.44e-33	4.35e-31	1.22	up	196	179	277	107	36	87	0.04131	0.04783	0.04018	0.02151	0.01758	0.01741	0.04311	0.00337	0.01883	0.00189
GXT_22027493	NM_002025	GXL_745112	AFF2	2334	NC_000023	chrX	+	147582139	148082193	13747	21	4.61e-38	4.62e-36	-1.28	down	92	51	108	194	71	228	0.00336	0.00241	0.00279	0.00682	0.00634	0.00793	0.00285	0.00039	0.00703	0.00067
GXT_22028342	NM_018957	GXL_47696	SH3BP1/PDXP	-2	NC_000022	chr22	+	38035684	38052050	2575	18	0.00199	0.012	1.01	up	27	21	38	15	5	15	0.0055	0.00471	0.00505	0.00289	0.00221	0.00271	0.00509	0.00032	0.0026	0.00029
GXT_22028798	NM_001039966	GXL_35190	GPER	2852	NC_000007	chr7	+	1126443	1133451	2971	3	5.58e-10	1.14e-08	-1.03	down	47	38	65	92	49	94	0.00812	0.00862	0.0079	0.01527	0.02025	0.01575	0.00821	0.0003	0.01709	0.00224
GXT_22029059	NM_007250	GXL_827437	KLF8	11279	NC_000023	chrX	+	56258822	56314322	5421	6	6.3e-07	8.91e-06	-1.34	down	18	8	18	37	12	43	0.00165	0.001	0.00113	0.00338	0.00272	0.00381	0.00126	0.00028	0.0033	0.00045
GXT_22029788	NM_001039130	GXL_45947	ALOX15B	247	NC_000017	chr17	+	7942358	7952452	2629	13	2.89e-39	3.04e-37	-2.26	down	13	10	26	85	28	69	0.00259	0.00231	0.00344	0.01558	0.0124	0.01269	0.00278	0.00048	0.01356	0.00144
GXT_22029791	NM_001039131	GXL_45947	ALOX15B	247	NC_000017	chr17	+	7942358	7952452	2494	12	8.48e-41	9.55e-39	-2.24	down	13	9	26	81	26	68	0.00273	0.00226	0.00362	0.01563	0.01208	0.01318	0.00287	0.00056	0.01363	0.00148
GXT_22029986	NM_182734	GXL_128243	PLCB1	23236	NC_000020	chr20	+	8113296	8865547	6823	33	8.24e-45	1.06e-42	-1.97	down	57	26	73	170	91	190	0.00395	0.00235	0.00334	0.01126	0.01512	0.01278	0.00321	0.00066	0.01305	0.00159
GXT_22030424	NM_001040168	GXL_35115	LFNG	3955	NC_000007	chr7	+	2559479	2568811	1394	8	5.02e-11	1.14e-09	1.26	up	59	65	108	35	14	27	0.01882	0.02632	0.02471	0.01103	0.01057	0.00822	0.02328	0.00322	0.00994	0.00123
GXT_22032176	NM_001039112	GXL_384293	FER1L6	654463	NC_000008	chr8	+	124864227	125132302	6051	41	0.00719	0.0355	1.26	up	7	4	13	1	3	1	0.00052	0.00033	0.00072	8e-05	0.00061	8e-05	0.00052	0.00016	0.00026	0.00025
GXT_22032497	NM_032291	GXL_228197	SGIP1	84251	NC_000001	chr1	+	66999825	67210768	4694	25	8.15e-37	7.75e-35	1.49	up	215	111	268	75	23	73	0.02136	0.01479	0.01832	0.00708	0.00549	0.0069	0.01816	0.00268	0.00649	0.00071
GXT_22032692	NM_014033	GXL_59476	METTL7A	25840	NC_000012	chr12	+	51318534	51326300	3390	2	4.69e-64	1.12e-61	-1.11	down	368	259	528	820	348	776	0.05695	0.05103	0.05627	0.11992	0.12568	0.11359	0.05475	0.00265	0.11973	0.00494
GXT_22032967	NM_016239	GXL_381737	MYO15A	51168	NC_000017	chr17	+	18012020	18083116	11863	65	0.00191	0.0116	-1.13	down	6	10	8	20	9	15	0.00027	0.00045	0.00021	0.00071	0.00072	0.00055	0.00031	0.0001	0.00066	8e-05
GXT_22033054	NM_152795	GXL_382179	HIF3A	64344	NC_000019	chr19	+	46800305	46846690	5850	15	3.48e-16	1.18e-14	-3.67	down	3	1	3	23	17	21	0.00027	0.00012	0.00019	0.00178	0.00336	0.0017	0.00019	6e-05	0.00228	0.00076
GXT_22033061	NM_022462	GXL_382179	HIF3A	64344	NC_000019	chr19	+	46801659	46846690	5908	15	3.48e-16	1.18e-14	-3.67	down	3	1	3	23	17	21	0.00027	0.00011	0.00018	0.00176	0.00332	0.00169	0.00019	7e-05	0.00226	0.00075
GXT_22033255	NM_030641	GXL_382827	APOL6	80830	NC_000022	chr22	+	36054660	36064456	9797	1	1.88e-13	5.24e-12	-1.06	down	45	37	106	135	47	117	0.00241	0.00254	0.00391	0.00683	0.00589	0.00595	0.00295	0.00068	0.00622	0.00043
GXT_22033264	NM_002688	GXL_382759	GP1BB	2812	NC_000022	chr22	+	19701987	19710845	2072	12	5.57e-31	4.12e-29	-1.02	down	120	94	151	240	106	246	0.02607	0.02834	0.02446	0.05204	0.05691	0.05456	0.02629	0.00159	0.0545	0.00199
GXT_22033293	XM_944785	GXL_382986	LOC644662	644662	NC_000003	chr3	+	125985645	126010368	741	3	0.00477	0.0252	-3.21	down	0	1	0	6	2	2	0	0.00091	0	0.00401	0.00331	0.00134	0.0003	0.00043	0.00289	0.00113
GXT_22033314	NR_002949	GXL_119088	NUDT16P1	152195	NC_000003	chr3	+	131080689	131083966	2261	3	3.6e-08	5.98e-07	-1.35	down	13	14	16	41	12	44	0.00302	0.00418	0.0025	0.00899	0.00652	0.00969	0.00323	0.0007	0.0084	0.00136
GXT_22033735	NR_002835	GXL_384291	HAS2-AS1	594842	NC_000008	chr8	+	122651586	122657565	2288	4	1.41e-20	6.15e-19	1.17	up	169	83	232	65	28	71	0.03864	0.02447	0.03657	0.01409	0.01479	0.01515	0.03323	0.00625	0.01468	0.00044
GXT_22214770	AK225939	GXL_193786	MMP19	4327	NC_000012	chr12	-	56230210	56236757	1604	6	9.35e-48	1.35e-45	1.01	up	866	724	1358	464	198	497	0.27704	0.29511	0.29732	0.14095	0.14928	0.15184	0.28982	0.00908	0.14736	0.00465
GXT_22214860	AK225943	GXL_45932	ST6GALNAC2	10610	NC_000017	chr17	-	74561701	74581943	1663	9	1.76e-06	2.32e-05	-2.54	down	2	2	5	18	8	12	0.00063	0.00081	0.00087	0.00507	0.00517	0.00329	0.00077	0.0001	0.00451	0.00086
GXT_22214927	AK225623	GXL_3403	DENND1C	79958	NC_000019	chr19	-	6467457	6481798	2556	23	0.00469	0.0249	-3.99	down	0	0	1	4	1	5	0	0	6e-05	0.00035	0.00022	0.00044	2e-05	3e-05	0.00034	9e-05
GXT_22215002	AK226019	GXL_249853	GGT5	2687	NC_000022	chr22	-	24615622	24641046	2334	11	1.66e-125	1.65e-122	-1.69	down	379	325	501	1234	583	1261	0.07631	0.08442	0.07142	0.23593	0.28024	0.24327	0.07738	0.00536	0.25315	0.01939
GXT_22215019	AK225855	GXL_171094	FILIP1L	11259	NC_000003	chr3	-	99567289	99594988	2898	3	2.21e-82	8.56e-80	1.18	up	580	412	831	253	112	259	0.10499	0.09585	0.10358	0.04329	0.04747	0.0445	0.10147	0.00402	0.04509	0.00176
GXT_22215045	AK225812	GXL_164638	SORBS2	8470	NC_000004	chr4	-	186508459	186697066	3381	23	4.82e-79	1.75e-76	-1.14	down	661	546	959	1690	579	1629	0.09082	0.09817	0.09397	0.22453	0.19104	0.21799	0.09432	0.00301	0.21119	0.01449
GXT_22215050	AK225327	GXL_164638	SORBS2	8470	NC_000004	chr4	-	186508460	186733373	3030	21	7.32e-80	2.7e-77	-1.14	down	654	540	948	1681	570	1620	0.10078	0.10886	0.10406	0.25028	0.2107	0.24319	0.10457	0.00332	0.23472	0.01723
GXT_22215060	AK225861	GXL_744803	SOX30	11063	NC_000005	chr5	-	157053305	157079407	1505	2	0.000288	0.00227	-2.14	down	1	1	6	16	2	9	0.00035	0.00045	0.00131	0.00527	0.00163	0.00298	0.0007	0.00043	0.00329	0.0015
GXT_22215061	AK225826	GXL_103234	CCDC69	26112	NC_000005	chr5	-	150560613	150603624	3369	9	5.15e-83	2.05e-80	-1.22	down	268	201	407	620	287	672	0.0405	0.03858	0.04153	0.08785	0.10139	0.09564	0.0402	0.00122	0.09496	0.00555
GXT_22215206	AK225578	GXL_46989	CYP4B1	1580	NC_000001	chr1	+	47264718	47284532	1618	12	2.52e-06	3.23e-05	#NAME?	down	0	0	0	8	2	7	0	0	0	0.00215	0.00152	0.00215	0	0	0.00194	0.0003
GXT_22215207	AK225576	GXL_46989	CYP4B1	1580	NC_000001	chr1	+	47264718	47284771	1857	12	5.91e-07	8.39e-06	#NAME?	down	0	0	0	10	2	7	0	0	0	0.0024	0.00132	0.00188	0	0	0.00187	0.00044
GXT_22215211	AK225541	GXL_58994	PADI1	29943	NC_000001	chr1	+	17531621	17571021	2367	16	0.000439	0.00327	1.25	up	18	16	26	5	5	8	0.00399	0.00427	0.00397	0.00084	0.00259	0.00168	0.00408	0.00014	0.0017	0.00071
GXT_22215233	AK225949	GXL_134185	KAZALD1	81621	NC_000010	chr10	+	102821747	102825030	1445	5	2.62e-73	7.92e-71	-1.27	down	318	207	429	764	315	713	0.11214	0.09267	0.10214	0.25032	0.25404	0.23671	0.10232	0.00795	0.24702	0.00745
GXT_22215296	AK225689	GXL_59476	METTL7A	25840	NC_000012	chr12	+	51318798	51324743	1569	2	3.05e-47	4.28e-45	-1.12	down	195	147	277	438	195	409	0.0652	0.06209	0.06377	0.1384	0.15227	0.12888	0.06369	0.00127	0.13985	0.0096
GXT_22215299	AK225595	GXL_59476	METTL7A	25840	NC_000012	chr12	+	51318799	51325868	1582	3	2.44e-46	3.29e-44	-1.15	down	190	152	283	454	207	412	0.06299	0.06369	0.06461	0.1423	0.16028	0.12877	0.06376	0.00066	0.14378	0.01291
GXT_22215302	AK225384	GXL_103602	OAS1	4938	NC_000012	chr12	+	113344782	113357708	1616	6	7.55e-09	1.36e-07	-1.37	down	16	20	39	68	34	37	0.00519	0.00834	0.00805	0.02025	0.02429	0.01049	0.00719	0.00142	0.01834	0.00579
GXT_22215357	AK225396	GXL_89940	CDH3	1001	NC_000016	chr16	+	68679213	68732320	2577	16	0.000206	0.00169	-1.41	down	4	8	3	14	6	18	0.00081	0.00157	0.00042	0.0025	0.00238	0.00348	0.00093	0.00048	0.00279	0.00049
GXT_22215375	AK225719	GXL_8726	MAP2K6	5608	NC_000017	chr17	+	67410852	67517974	1542	7	0.002	0.0121	-2.71	down	1	1	1	6	4	5	0.00034	0.00044	0.00023	0.00161	0.00318	0.0016	0.00034	9e-05	0.00213	0.00074
GXT_22215437	AK225425	GXL_262480	GDF15	9518	NC_000019	chr19	+	18496968	18499876	1090	2	4.86e-26	2.85e-24	1.96	up	93	88	166	42	8	26	0.04381	0.05316	0.05395	0.0191	0.00901	0.01188	0.05031	0.00461	0.01333	0.00424
GXT_22215514	AK225868	GXL_925870	UPK1B/C3orf30	-2	NC_000003	chr3	+	118905585	118923988	1937	7	0.000669	0.00474	1.97	up	10	7	18	5	1	1	0.00244	0.00244	0.00309	0.00102	0.00063	0.00026	0.00266	0.00031	0.00064	0.00031
GXT_22215518	AK225673	GXL_193604	GALNTL2	117248	NC_000003	chr3	+	16216159	16218722	2564	1	3.66e-128	3.77e-125	-2.7	down	30	31	41	243	98	197	0.00592	0.00815	0.00578	0.04667	0.04693	0.03818	0.00662	0.00109	0.04393	0.00406
GXT_22215535	AK225860	GXL_33715	ART3	419	NC_000004	chr4	+	76932353	77033955	1517	10	1.82e-06	2.39e-05	-2.46	down	2	3	5	21	10	9	0.00069	0.00133	0.00096	0.00608	0.00728	0.00263	0.00099	0.00026	0.00533	0.00197
GXT_22215609	AK226021	GXL_826880	LRRC17	10234	NC_000007	chr7	+	102553438	102585396	1963	4	0.000216	0.00176	3.64	up	8	7	9	0	0	2	0.00216	0.0024	0.00166	0	0	0.00051	0.00207	0.00031	0.00017	0.00024
GXT_22215613	AK225854	GXL_33674	PHTF2	57157	NC_000007	chr7	+	77428122	77586542	4793	18	3.94e-47	5.5e-45	1.06	up	958	669	1450	449	204	482	0.09904	0.08749	0.10382	0.04303	0.04865	0.04738	0.09678	0.00686	0.04635	0.00241
GXT_22215615	AK225701	GXL_826880	LRRC17	10234	NC_000007	chr7	+	102553447	102585540	2098	4	7.98e-05	0.000732	3.77	up	9	8	9	0	0	2	0.00227	0.00257	0.00155	0	0	0.00047	0.00213	0.00043	0.00016	0.00022
GXT_22216047	NM_001042518	GXL_480213	SERPINA9	327657	NC_000014	chr14	-	94929058	94942670	1541	6	2.77e-15	8.85e-14	1.44	up	95	78	113	36	15	34	0.03132	0.03282	0.02617	0.01126	0.01115	0.01067	0.0301	0.00285	0.01103	0.00026
GXT_22216419	NM_080829	GXL_693440	FAM65C	140876	NC_000020	chr20	-	49202645	49253426	4283	22	1.04e-06	1.42e-05	-2.22	down	3	4	1	17	5	15	0.00037	0.00063	8e-05	0.00185	0.00143	0.00174	0.00036	0.00022	0.00167	0.00018
GXT_22216465	NM_001076778	GXL_171070	FAM107A	11170	NC_000003	chr3	-	58549844	58563491	3367	4	1.67e-101	1e-98	-2.65	down	44	33	49	285	109	249	0.00654	0.00661	0.00526	0.04123	0.03902	0.03595	0.00614	0.00062	0.03873	0.00217
GXT_22216941	NM_001079859	GXL_219526	GPR64	10149	NC_000023	chrX	-	19007425	19140755	4811	28	4.33e-36	3.96e-34	-2.7	down	13	10	20	88	41	86	0.00131	0.0014	0.00143	0.00849	0.00927	0.00822	0.00138	5e-05	0.00866	0.00045
GXT_22216943	NM_001079860	GXL_219526	GPR64	10149	NC_000023	chrX	-	19007425	19140755	4788	27	1.35e-36	1.27e-34	-2.69	down	13	10	20	88	40	86	0.00131	0.00141	0.00143	0.00853	0.00918	0.00826	0.00138	5e-05	0.00866	0.00039
GXT_22216944	NM_001079858	GXL_219526	GPR64	10149	NC_000023	chrX	-	19007425	19140755	4853	29	2.55e-36	2.36e-34	-2.72	down	13	10	20	88	42	86	0.0013	0.00139	0.00141	0.00842	0.00936	0.00815	0.00137	5e-05	0.00864	0.00052
GXT_22217394	NM_000359	GXL_480134	TGM1	7051	NC_000014	chr14	-	24718320	24732416	2777	15	1.42e-06	1.9e-05	-1.16	down	24	13	23	39	17	54	0.00412	0.00316	0.00299	0.00625	0.00707	0.00897	0.00342	0.0005	0.00743	0.00114
GXT_22217815	NM_001042459	GXL_171094	FILIP1L	11259	NC_000003	chr3	-	99566772	99833349	4211	5	3.5e-69	9.5e-67	1.2	up	675	482	984	297	125	307	0.08408	0.07718	0.08441	0.03497	0.03646	0.0363	0.08189	0.00333	0.03591	0.00067
GXT_22217931	NM_006665	GXL_925980	HPSE	10855	NC_000004	chr4	-	84213614	84256306	4652	13	2.24e-10	4.76e-09	-1.68	down	9	16	22	40	27	47	0.0009	0.00217	0.00171	0.00384	0.0066	0.00482	0.00159	0.00052	0.00509	0.00114
GXT_22218927	NM_002470	GXL_480780	MYH3	4621	NC_000017	chr17	-	10531843	10559467	6019	40	1.44e-101	8.73e-99	-1.35	down	216	159	320	551	245	579	0.01717	0.01613	0.01702	0.04157	0.04324	0.04357	0.01677	0.00046	0.04279	0.00088
GXT_22219163	NM_025045	GXL_249668	BAIAP2L2	80115	NC_000022	chr22	-	38480896	38506676	2145	14	5.07e-08	8.29e-07	-1.23	down	21	21	30	55	26	53	0.00465	0.00597	0.00472	0.01155	0.01202	0.01091	0.00511	0.00061	0.01149	0.00045
GXT_22219255	NM_024590	GXL_220995	ARSJ	79642	NC_000004	chr4	-	114821440	114900878	4678	2	6.53e-98	3.71e-95	1.41	up	3130	2518	4745	1250	493	1409	0.34713	0.35854	0.36333	0.13091	0.12834	0.14824	0.35633	0.0068	0.13583	0.00884
GXT_22219544	NM_001040627	GXL_172559	NCALD	83988	NC_000008	chr8	-	102698770	103136562	3569	6	1.78e-14	5.32e-13	-1.07	down	55	38	65	121	41	109	0.00808	0.00709	0.00638	0.01674	0.01412	0.01493	0.00718	0.0007	0.01526	0.0011
GXT_22219561	NM_001040625	GXL_172559	NCALD	83988	NC_000008	chr8	-	102698770	103136562	3656	7	1.78e-14	5.32e-13	-1.07	down	55	38	65	121	41	109	0.00789	0.00692	0.00623	0.01634	0.01378	0.01457	0.00701	0.00068	0.0149	0.00107
GXT_22219564	NM_001040624	GXL_172559	NCALD	83988	NC_000008	chr8	-	102698770	103136562	3743	8	2.1e-14	6.24e-13	-1.06	down	55	39	65	121	42	109	0.0077	0.00694	0.00608	0.01596	0.01379	0.01424	0.00691	0.00066	0.01466	0.00094
GXT_22219565	NM_001040626	GXL_172559	NCALD	83988	NC_000008	chr8	-	102698770	103136562	3656	7	2.1e-14	6.24e-13	-1.06	down	55	39	65	121	42	109	0.00789	0.00711	0.00623	0.01634	0.01412	0.01457	0.00708	0.00068	0.01501	0.00096
GXT_22219577	NM_001040629	GXL_172559	NCALD	83988	NC_000008	chr8	-	102698770	103136562	3625	7	1.78e-14	5.32e-13	-1.07	down	55	38	65	121	41	109	0.00795	0.00698	0.00628	0.01648	0.0139	0.0147	0.00707	0.00068	0.01503	0.00108
GXT_22219579	NM_001040630	GXL_172559	NCALD	83988	NC_000008	chr8	-	102698770	103137135	3809	6	1.78e-14	5.32e-13	-1.07	down	55	38	65	121	41	109	0.00757	0.00665	0.00598	0.01569	0.01323	0.01399	0.00673	0.00065	0.0143	0.00103
GXT_22219785	NM_001044392	GXL_1227395	MUC1/KRTCAP2	-2	NC_000001	chr1	-	155158300	155162706	863	5	8.59e-21	3.81e-19	-1.09	down	78	58	102	175	71	156	0.045	0.04196	0.04057	0.09665	0.09655	0.08567	0.04251	0.00185	0.09296	0.00515
GXT_22219834	NM_001044391	GXL_1227395	MUC1/KRTCAP2	-2	NC_000001	chr1	-	155158300	155162706	836	5	1.1e-20	4.84e-19	-1.07	down	80	57	100	171	69	156	0.0477	0.04291	0.04125	0.09759	0.09673	0.08872	0.04395	0.00273	0.09435	0.00399
GXT_22219850	NM_001044390	GXL_1227395	MUC1/KRTCAP2	-2	NC_000001	chr1	-	155158300	155162706	995	7	2.39e-19	9.75e-18	-1.02	down	94	72	116	196	78	186	0.04555	0.04399	0.03955	0.09172	0.08994	0.08643	0.04303	0.00254	0.08936	0.0022
GXT_22219870	NM_001039844	GXL_380378	ACBD7	414149	NC_000010	chr10	-	15117474	15130775	3370	4	0.000435	0.00325	-1.32	down	8	7	10	18	10	21	0.00125	0.0014	0.00107	0.0025	0.00364	0.00296	0.00124	0.00013	0.00303	0.00047
GXT_22220413	NM_002976	GXL_482264	SCN7A	6332	NC_000002	chr2	-	167261539	167343478	5727	25	0.00215	0.0128	-2.41	down	2	0	1	8	0	7	0.00018	0	6e-05	0.00061	0	0.00052	8e-05	7e-05	0.00038	0.00027
GXT_22220592	NM_001080506	GXL_220879	TMEM150C	441027	NC_000004	chr4	-	83405604	83483126	1888	8	7.63e-07	1.06e-05	-1.15	down	21	14	37	54	18	54	0.00569	0.00464	0.00632	0.01324	0.01105	0.01398	0.00555	0.00069	0.01276	0.00124
GXT_22220924	NR_003051	GXL_483912	RMRP	6023	NC_000009	chr9	-	35657748	35658015	268	1	7.33e-10	1.48e-08	-1.11	down	3	27	5	74	4	12	0.00587	0.06793	0.00674	0.13695	0.01832	0.0223	0.02685	0.02905	0.05919	0.05501
GXT_22221156	NM_001076787	GXL_140993	TP53I11	9537	NC_000011	chr11	-	44953899	44972608	3648	8	3.05e-88	1.36e-85	-1.31	down	2616	2134	3750	7043	2894	6775	0.36671	0.38522	0.36348	0.93299	0.95207	0.90035	0.3718	0.00958	0.92847	0.02136
GXT_22221278	NM_175739	GXL_480213	SERPINA9	327657	NC_000014	chr14	-	94929058	94942670	1841	5	2.04e-23	1.04e-21	1.56	up	118	110	151	47	17	43	0.03277	0.03919	0.02936	0.01239	0.01067	0.01136	0.03377	0.00408	0.01147	0.00071
GXT_22221301	NM_004573	GXL_225488	PLCB2	5330	NC_000015	chr15	-	40580098	40600174	4679	32	0.00024	0.00193	-2.54	down	2	1	5	12	10	5	0.00022	0.00014	0.00039	0.00106	0.0021	0.00053	0.00025	0.0001	0.00123	0.00065
GXT_22221827	NM_001040628	GXL_172559	NCALD	83988	NC_000008	chr8	-	102698770	103136562	3712	8	1.78e-14	5.32e-13	-1.07	down	55	38	65	121	41	109	0.00777	0.00682	0.00613	0.0161	0.01358	0.01435	0.00691	0.00067	0.01468	0.00105
GXT_22222434	NM_001077620	GXL_692662	PRCD	768206	NC_000017	chr17	+	74536121	74541458	1994	5	0.0029	0.0166	-1.43	down	6	2	3	15	3	8	0.00132	0.00068	0.00054	0.00362	0.00185	0.002	0.00085	0.00034	0.00249	0.0008
GXT_22222698	NM_001080121	GXL_128390	PRNP	5621	NC_000020	chr20	+	4666797	4682234	2735	2	2.07e-152	3.28e-149	-1.31	down	864	656	1303	2307	887	2359	0.16514	0.16086	0.17123	0.41686	0.39532	0.4277	0.16574	0.00425	0.41329	0.01346
GXT_22222700	NM_001080122	GXL_128390	PRNP	5621	NC_000020	chr20	+	4666797	4682234	2731	2	1.05e-153	1.74e-150	-1.31	down	861	651	1293	2298	880	2346	0.16497	0.16028	0.1706	0.41629	0.39377	0.42695	0.16528	0.00422	0.41234	0.01383
GXT_22222702	NM_001080123	GXL_128390	PRNP	5621	NC_000020	chr20	+	4667157	4682234	2604	2	2.92e-153	4.74e-150	-1.31	down	855	651	1296	2305	885	2351	0.17126	0.1669	0.17826	0.43667	0.41223	0.44652	0.17214	0.00468	0.43181	0.01442
GXT_22223184	NM_000050	GXL_185059	ASS1	445	NC_000009	chr9	+	133320094	133376661	1848	16	5.01e-202	1.73e-198	-1.61	down	318	215	370	917	403	857	0.07585	0.0681	0.06288	0.21352	0.2389	0.20066	0.06894	0.00533	0.21769	0.01589
GXT_22223309	NM_013358	GXL_58994	PADI1	29943	NC_000001	chr1	+	17531621	17572501	3847	16	9.22e-19	3.64e-17	1.68	up	64	52	74	14	14	12	0.00873	0.00893	0.00695	0.00168	0.00447	0.00155	0.0082	0.00089	0.00257	0.00135
GXT_22223571	NM_023037	GXL_40604	FRY	10129	NC_000013	chr13	+	32605437	32870776	10717	61	1.8e-47	2.56e-45	-1.12	down	181	147	273	435	182	411	0.00847	0.00859	0.00844	0.01855	0.01826	0.01785	0.0085	6e-05	0.01822	0.00029
GXT_22223902	NM_001080427	GXL_482238	THSD7B	80731	NC_000002	chr2	+	137748462	138435287	5847	27	0.00102	0.00679	-1.96	down	1	2	6	12	4	10	9e-05	0.00023	0.00037	0.00093	0.00063	0.00077	0.00023	0.00011	0.00078	0.00012
GXT_22223978	NM_001079818	GXL_57963	ITGA6	3655	NC_000002	chr2	+	173292314	173371181	5680	25	2.7e-104	1.75e-101	-1.15	down	500	442	845	1224	531	1360	0.04315	0.0489	0.04963	0.09972	0.10564	0.11173	0.04723	0.0029	0.1057	0.0049
GXT_22224135	NM_173660	GXL_164651	DOK7	285489	NC_000004	chr4	+	3465033	3496209	2566	7	3.56e-07	5.22e-06	-1.56	down	6	12	6	26	11	28	0.00123	0.00315	0.00076	0.00483	0.00498	0.00543	0.00171	0.00103	0.00508	0.00025
GXT_22224370	NM_001040666	GXL_33545	STEAP2	261729	NC_000007	chr7	+	89843134	89866992	2308	7	0.000227	0.00184	-1.18	down	17	9	18	23	17	34	0.00386	0.00234	0.00282	0.00494	0.00904	0.00734	0.00301	0.00063	0.00711	0.00168
GXT_22224850	NM_032867	GXL_380601	MICALCL	84953	NC_000011	chr11	+	12308447	12380691	3045	9	3.63e-06	4.5e-05	1.65	up	35	22	41	10	2	16	0.00586	0.00465	0.00474	0.00162	0.00081	0.00262	0.00508	0.00055	0.00168	0.00074
GXT_22225010	NM_015180	GXL_247711	SYNE2	23224	NC_000014	chr14	+	64319683	64693167	21811	115	1.05e-71	3.03e-69	-1.69	down	73	79	137	299	118	338	0.00161	0.00226	0.00207	0.00632	0.00642	0.0071	0.00198	0.00027	0.00661	0.00035
GXT_22225011	NM_182914	GXL_247711	SYNE2	23224	NC_000014	chr14	+	64319683	64693167	21877	116	1.05e-71	3.03e-69	-1.69	down	73	79	137	299	118	338	0.00161	0.00225	0.00206	0.00631	0.0064	0.00707	0.00197	0.00027	0.00659	0.00034
GXT_22225066	NM_152451	GXL_4910	GRINL1A	81488	NC_000015	chr15	+	57884102	57977562	2314	12	0.00119	0.00778	-1.44	down	1	7	3	11	5	12	0.00023	0.00175	0.00031	0.00214	0.00212	0.00237	0.00076	0.0007	0.00221	0.00011
GXT_22225585	NM_003102	GXL_482710	SOD3	6649	NC_000004	chr4	+	24797085	24802467	1529	2	1.07e-101	6.53e-99	-1.84	down	174	148	214	611	287	643	0.059	0.06438	0.04923	0.19703	0.22724	0.20717	0.05754	0.00627	0.21048	0.01255
GXT_22225763	NM_025154	GXL_1235853	SUN1/GET4	-2	NC_000007	chr7	+	856252	914557	3830	18	3.13e-62	7.16e-60	-1.1	down	876	631	1246	1883	798	1953	0.11285	0.10521	0.11027	0.22698	0.24084	0.23867	0.10944	0.00317	0.2355	0.00609
GXT_22225914	NM_182487	GXL_184892	OLFML2A	169611	NC_000009	chr9	+	127539437	127577161	6542	8	7.09e-87	3.05e-84	-1.5	down	617	503	929	1827	856	1781	0.04899	0.05059	0.05039	0.13633	0.15695	0.13406	0.04999	0.00071	0.14245	0.0103
GXT_22225991	NR_003285	GXL_484375	RN5-8S1	100008587	NC_000024	chrY	+	10037764	10037918	155	1	1.38e-88	6.24e-86	-1.23	down	89	424	115	1416	72	197	0.29806	1.82697	0.2652	4.47387	0.56508	0.62623	0.79674	0.7286	1.88839	1.82838
GXT_22226719	NM_205863	GXL_925789	PARD3B	117583	NC_000002	chr2	+	205410516	206480537	3522	22	6.38e-57	1.23e-54	-1.19	down	153	101	221	358	145	338	0.02037	0.01857	0.0205	0.04585	0.04589	0.04381	0.01981	0.00088	0.04518	0.00097
GXT_22226723	NM_152526	GXL_925789	PARD3B	117583	NC_000002	chr2	+	205410516	206480537	3639	22	4.08e-54	7.12e-52	-1.18	down	173	104	232	378	155	365	0.02268	0.01853	0.02085	0.04687	0.04723	0.04598	0.02069	0.0017	0.04669	0.00053
GXT_22226725	NM_057177	GXL_925789	PARD3B	117583	NC_000002	chr2	+	205410516	206480537	3618	22	9.43e-55	1.68e-52	-1.19	down	170	104	224	372	154	357	0.02228	0.01864	0.02038	0.04636	0.04716	0.04539	0.02043	0.00149	0.0463	0.00072
GXT_22226872	NM_003178	GXL_193618	SYN2	6854	NC_000003	chr3	+	12045862	12227226	3884	12	0.00857	0.0409	-1.81	down	2	1	3	6	2	9	0.00027	0.00017	0.00028	0.00077	0.00063	0.00103	0.00024	5e-05	0.00081	0.00017
GXT_22227035	NM_004277	GXL_261223	SLC25A27	9481	NC_000006	chr6	+	46620652	46645927	2986	9	1.21e-17	4.51e-16	-1.52	down	34	9	37	88	26	63	0.00509	0.00203	0.00423	0.01312	0.00989	0.01034	0.00378	0.00129	0.01112	0.00143
GXT_22227298	NM_001042537	GXL_11966	SLC9A6	10479	NC_000023	chrX	+	135067586	135129428	4728	16	2.91e-36	2.69e-34	1.01	up	485	377	753	267	103	267	0.05158	0.05192	0.05441	0.02664	0.02571	0.02697	0.05264	0.00126	0.02644	0.00053
GXT_22227436	NM_181645	GXL_38907	CCDC67	159989	NC_000011	chr11	+	93063883	93171636	2666	14	0.0101	0.0467	-2.39	down	1	1	0	3	2	5	0.0002	0.00025	0	0.00056	0.00092	0.00083	0.00015	0.00011	0.00077	0.00015
GXT_22227665	NM_021012	GXL_744337	KCNJ12	3768	NC_000017	chr17	+	21279699	21323179	5230	3	1.96e-10	4.18e-09	-3.19	down	3	1	3	20	10	17	0.0003	0.00013	0.00021	0.0019	0.00235	0.00162	0.00021	7e-05	0.00196	0.0003
GXT_22530978	NM_020709	GXL_189085	PNMAL2	57469	NC_000019	chr19	-	46994448	46999169	4722	1	1.69e-08	2.92e-07	-1.05	down	38	27	54	64	35	92	0.00422	0.00378	0.00413	0.00672	0.0091	0.00971	0.00404	0.00019	0.00851	0.00129
GXT_22530999	NM_001085400	GXL_664321	RELL1	768211	NC_000004	chr4	-	37612256	37687999	3618	7	6.64e-09	1.2e-07	-1.1	down	28	27	50	81	28	72	0.00391	0.00503	0.0049	0.0111	0.00881	0.0099	0.00461	0.0005	0.00994	0.00094
GXT_22531002	NM_001085399	GXL_664321	RELL1	768211	NC_000004	chr4	-	37592422	37687999	1327	7	0.00136	0.00869	-1.19	down	10	8	8	15	11	21	0.00356	0.00406	0.00207	0.0056	0.00833	0.00788	0.00323	0.00085	0.00727	0.0012
GXT_22531025	NM_001083605	GXL_190012	PTCH1	5727	NC_000009	chr9	-	98205264	98270322	7644	24	3.12e-20	1.34e-18	-1.24	down	74	57	97	153	77	195	0.00494	0.00468	0.00435	0.00921	0.01138	0.01146	0.00466	0.00024	0.01068	0.00104
GXT_22531026	NM_001083602	GXL_190012	PTCH1	5727	NC_000009	chr9	-	98205264	98279247	8051	24	3.12e-20	1.34e-18	-1.24	down	74	57	97	153	77	195	0.00469	0.00444	0.00413	0.00875	0.01081	0.01089	0.00442	0.00023	0.01015	0.00099
GXT_22531027	NM_001010915	GXL_664422	PTPLAD2	401494	NC_000009	chr9	-	21006365	21031635	1416	7	2.68e-10	5.66e-09	-1.04	down	62	33	86	116	51	116	0.02149	0.01429	0.02067	0.03657	0.04075	0.03799	0.01882	0.00322	0.03844	0.00174
GXT_22531142	NM_001098845	GXL_1222140	ANXA8L1	728113	NC_000010	chr10	-	47157989	47174040	1954	12	0.0086	0.041	#NAME?	down	0	0	0	0	2	4	0	0	0	0	0.00063	0.00051	0	0	0.00038	0.00027
GXT_22531158	NM_012074	GXL_155851	DPF3	8110	NC_000014	chr14	-	73136660	73360809	2271	9	0.000109	0.00096	1.33	up	34	28	35	22	4	8	0.00728	0.00802	0.00516	0.00402	0.00189	0.00176	0.00682	0.00121	0.00256	0.00104
GXT_22531193	NM_001009984	GXL_122575	C20orf194	25943	NC_000020	chr20	-	3229948	3388255	6856	37	1.57e-35	1.4e-33	-1.07	down	292	242	440	701	277	645	0.0205	0.02138	0.02136	0.04737	0.04594	0.0433	0.02108	0.00041	0.04554	0.00169
GXT_22531217	NM_017954	GXL_182336	CADPS2	93664	NC_000007	chr7	-	121958478	122526813	6054	29	2.06e-14	6.13e-13	-1.07	down	48	40	68	103	43	119	0.00399	0.00412	0.00358	0.00729	0.00816	0.00848	0.0039	0.00023	0.00798	0.0005
GXT_22531225	NM_001083606	GXL_190012	PTCH1	5727	NC_000009	chr9	-	98205264	98269699	7743	24	1.86e-20	8.08e-19	-1.23	down	75	57	99	154	77	198	0.00495	0.00462	0.00439	0.00916	0.01124	0.01151	0.00465	0.00023	0.01064	0.00105
GXT_22531226	NM_001083607	GXL_190012	PTCH1	5727	NC_000009	chr9	-	98205264	98269481	7817	24	3.71e-20	1.58e-18	-1.24	down	74	58	97	153	78	197	0.00483	0.00466	0.00425	0.00901	0.01129	0.01134	0.00458	0.00024	0.01055	0.00109
GXT_22531228	NM_001083603	GXL_190012	PTCH1	5727	NC_000009	chr9	-	98205264	98279247	7898	24	3.12e-20	1.34e-18	-1.24	down	74	57	97	153	77	195	0.00478	0.00452	0.00421	0.00892	0.01102	0.0111	0.0045	0.00023	0.01035	0.00101
GXT_22531230	NM_001083604	GXL_190012	PTCH1	5727	NC_000009	chr9	-	98205264	98270322	7661	24	3.12e-20	1.34e-18	-1.24	down	74	57	97	153	77	195	0.00493	0.00466	0.00434	0.00919	0.01136	0.01144	0.00464	0.00024	0.01066	0.00104
GXT_22531252	NM_130385	GXL_664106	MRVI1	10335	NC_000011	chr11	-	10594638	10715535	6208	20	1.84e-64	4.46e-62	-1.21	down	783	578	1185	1914	777	1941	0.06295	0.06016	0.06595	0.14566	0.14677	0.14894	0.06302	0.00236	0.14712	0.00136
GXT_22531310	NM_001098540	GXL_925980	HPSE	10855	NC_000004	chr4	-	84213614	84256034	4614	12	8.45e-13	2.24e-11	-1.67	down	10	16	22	41	27	48	0.00102	0.00219	0.00172	0.00398	0.00665	0.00497	0.00164	0.00048	0.0052	0.0011
GXT_22531331	NM_001009571	GXL_182336	CADPS2	93664	NC_000007	chr7	-	121958478	122526813	5931	28	2.05e-14	6.12e-13	-1.08	down	48	40	68	103	44	118	0.00407	0.00421	0.00366	0.00744	0.0084	0.00857	0.00398	0.00023	0.00814	0.0005
GXT_22531340	NM_017786	GXL_172608	SYBU	55638	NC_000008	chr8	-	110586405	110661132	3113	9	3.49e-09	6.51e-08	-1.36	down	28	17	28	56	31	56	0.00455	0.00347	0.00325	0.00876	0.01224	0.0088	0.00376	0.00057	0.00993	0.00163
GXT_22531364	NM_001098579	GXL_664106	MRVI1	10335	NC_000011	chr11	-	10594638	10673848	6032	20	8.98e-64	2.12e-61	-1.21	down	790	582	1199	1935	776	1959	0.06545	0.06236	0.06868	0.15155	0.15109	0.15452	0.0655	0.00258	0.15239	0.00152
GXT_22531440	NM_001093771	GXL_103586	TXNRD1	7296	NC_000012	chr12	+	104609559	104744062	3836	17	8.04e-76	2.67e-73	-1.01	down	3330	2495	4955	7078	2840	7298	0.42851	0.41405	0.44013	0.86539	0.86282	0.89286	0.42756	0.01067	0.87369	0.0136
GXT_22531466	NM_005640	GXL_664201	TAF4B	6875	NC_000018	chr18	+	23806409	23971649	4751	15	3.23e-10	6.75e-09	-2.03	down	6	5	16	35	15	30	0.00066	0.00071	0.00114	0.00334	0.00362	0.00304	0.00084	0.00022	0.00333	0.00024
GXT_22531528	NM_207510	GXL_1238994	PTGDS/LCNL1	-2	NC_000009	chr9	+	139877445	139880210	1836	3	0.00209	0.0126	-1.63	down	4	2	7	13	5	12	0.00114	0.00073	0.00118	0.00324	0.00334	0.00314	0.00102	0.0002	0.00324	8e-05
GXT_22531575	NM_014059	GXL_664132	C13orf15	28984	NC_000013	chr13	+	42031542	42045013	1108	5	4.64e-159	8.7e-156	-2	down	241	196	437	1177	427	1141	0.10937	0.11136	0.12966	0.49153	0.4499	0.47166	0.1168	0.00913	0.47103	0.017
GXT_22531579	NM_001097577	GXL_247869	ANG/RNASE4	-2	NC_000014	chr14	+	21156932	21162345	742	2	1.34e-15	4.36e-14	-1.26	down	33	36	50	118	35	87	0.02283	0.03187	0.0241	0.07732	0.05611	0.05648	0.02627	0.004	0.0633	0.00991
GXT_22531625	NM_148898	GXL_78271	FOXP2	93986	NC_000007	chr7	+	114055052	114333827	6443	18	0.00083	0.00571	-1.29	down	8	5	18	23	10	22	0.00065	0.00052	0.00095	0.00162	0.00172	0.00147	0.00071	0.00018	0.0016	0.0001
GXT_22531633	NM_145004	GXL_483765	ADAM32	203102	NC_000008	chr8	+	38965050	39142436	2728	25	0.0041	0.0222	-1.23	down	5	4	9	15	4	16	0.00096	0.00099	0.00106	0.00218	0.00135	0.00274	0.001	4e-05	0.00209	0.00057
GXT_22531663	NM_201593	GXL_90449	CACNB2	783	NC_000010	chr10	+	18429606	18830688	3964	14	7.11e-05	0.00066	-2.02	down	7	1	5	18	9	10	0.00093	0.00017	0.00046	0.00213	0.00217	0.00125	0.00052	0.00031	0.00185	0.00042
GXT_22531667	NM_015177	GXL_664109	DTX4	23220	NC_000011	chr11	+	58939812	58976060	5795	9	1.59e-16	5.52e-15	-1.44	down	27	30	41	95	37	85	0.00244	0.00314	0.00256	0.00791	0.00763	0.00701	0.00271	0.00031	0.00752	0.00038
GXT_22531756	NM_001098201	GXL_35190	GPER	2852	NC_000007	chr7	+	1127723	1133451	2644	2	3.08e-10	6.46e-09	-1.08	down	46	36	65	93	50	92	0.00902	0.00918	0.00888	0.01735	0.02322	0.01732	0.00903	0.00012	0.0193	0.00277
GXT_22531806	NM_021979	GXL_247803	HSPA2	3306	NC_000014	chr14	+	65007186	65009955	2770	1	7.38e-38	7.33e-36	-1.13	down	251	201	332	569	238	566	0.04753	0.04892	0.0433	0.10184	0.10545	0.10169	0.04658	0.00239	0.10299	0.00174
GXT_22531849	NM_001093772	GXL_33947	KIT	3815	NC_000004	chr4	+	55524095	55606881	5164	21	2.68e-16	9.15e-15	1.45	up	69	61	101	26	12	29	0.0067	0.00744	0.00661	0.00221	0.00262	0.00251	0.00692	0.00037	0.00245	0.00017
GXT_22531927	NM_033468	GXL_262436	ZNF257	113835	NC_000019	chr19	+	22235266	22273905	3522	4	0.0103	0.0475	-1.16	down	6	4	10	10	6	18	0.00089	0.00077	0.00103	0.00141	0.00209	0.00255	0.0009	0.00011	0.00202	0.00047
GXT_22531940	NM_001006655	GXL_175098	FAM149A	25854	NC_000004	chr4	+	187070327	187093817	2405	13	0.00496	0.0261	-1.35	down	8	4	17	10	14	23	0.00153	0.00112	0.00223	0.00195	0.00664	0.00467	0.00163	0.00046	0.00442	0.00192
GXT_22532009	AK129026	GXL_120887	FMO2	2327	NC_000001	chr1	+	171168401	171180713	3626	5	9.82e-08	1.56e-06	-2.41	down	2	4	1	24	4	11	0.00029	0.00074	0.0001	0.00308	0.00135	0.00151	0.00038	0.00027	0.00198	0.00078
GXT_22532025	AK030782	GXL_925488	DARC/CADM3	-2	NC_000001	chr1	+	159166199	159172817	2566	4	4.2e-96	2.29e-93	-1.9	down	171	125	262	656	285	671	0.03475	0.03285	0.03548	0.12383	0.13134	0.12759	0.03436	0.00111	0.12759	0.00307
GXT_22532046	AK050542	GXL_151197	DSTYK	25778	NC_000001	chr1	-	205112923	205132084	4937	9	1.97e-50	3.13e-48	-1.12	down	167	126	268	404	156	397	0.01688	0.01675	0.01901	0.03952	0.03754	0.03913	0.01755	0.00104	0.03873	0.00086
GXT_22532270	AK135008	GXL_57598	NPR1	4881	NC_000001	chr1	+	153658627	153666405	1989	13	0.000683	0.00482	-4.36	down	0	0	1	4	2	6	0	0	0.00018	0.00075	0.00123	0.0011	6e-05	8e-05	0.00103	0.0002
GXT_22532326	AK081039	GXL_4945	PCSK6	5046	NC_000015	chr15	-	101844176	101858614	1714	4	0.00128	0.00828	-2.42	down	0	2	2	7	4	6	0	0.00079	0.00042	0.00202	0.00287	0.00174	0.0004	0.00032	0.00221	0.00048
GXT_22532333	AK037033	GXL_4966	DUOX1	53905	NC_000015	chr15	+	45433182	45457754	3813	22	0.00746	0.0366	-1.1	down	9	6	15	20	10	17	0.00124	0.00088	0.00142	0.00239	0.0029	0.00183	0.00118	0.00022	0.00237	0.00044
GXT_22532351	AK031502	GXL_225488	PLCB2	5330	NC_000015	chr15	-	40579899	40587247	2760	15	0.000622	0.00444	-2.47	down	2	1	5	10	10	5	0.00038	0.00024	0.00065	0.00162	0.00356	0.0009	0.00042	0.00017	0.00203	0.00112
GXT_22532547	AK028350	GXL_11966	SLC9A6	10479	NC_000023	chrX	+	135122227	135129224	2719	2	3.17e-24	1.69e-22	1.04	up	325	247	474	167	66	172	0.06246	0.06126	0.06292	0.03046	0.02978	0.0314	0.06221	0.0007	0.03055	0.00066
GXT_22532677	AK077169	GXL_13760	KIF9	64147	NC_000003	chr3	-	47270600	47305823	2393	13	0.00143	0.00907	2.04	up	11	8	11	4	1	1	0.00228	0.00207	0.00159	0.00083	0.00051	0.00021	0.00198	0.00029	0.00052	0.00025
GXT_22532720	AK088459	GXL_181851	TNIK	23043	NC_000003	chr3	-	170781033	170825945	2406	13	0.00492	0.0259	1.9	up	6	6	13	2	1	2	0.00131	0.00168	0.0018	0.00041	0.00051	0.00041	0.0016	0.00021	0.00044	5e-05
GXT_22532967	AK036695	GXL_694612	FAM65B	9750	NC_000006	chr6	-	24839774	24848382	2029	3	1.68e-14	5.05e-13	-1.93	down	9	7	10	48	10	28	0.00233	0.00233	0.00178	0.011	0.00605	0.00673	0.00215	0.00026	0.00793	0.00219
GXT_22533013	AK132623	GXL_480780	MYH3	4621	NC_000017	chr17	-	10539152	10546042	2296	14	1.3e-36	1.23e-34	-1.2	down	90	66	117	213	85	201	0.01907	0.01733	0.01668	0.04277	0.04134	0.0397	0.01769	0.00101	0.04127	0.00125
GXT_22533028	AK086401	GXL_744347	JUP/KRT19	-2	NC_000017	chr17	-	39908745	39912487	3450	2	0.000213	0.00174	-1.02	down	24	13	32	46	22	35	0.00365	0.00254	0.00335	0.00647	0.00783	0.00505	0.00318	0.00047	0.00645	0.00114
GXT_22533150	AK152999	GXL_252201	ATP2A3	489	NC_000017	chr17	-	3827270	3844421	2502	8	0.00499	0.0262	-1.52	down	4	2	4	12	3	9	0.00084	0.00054	0.00058	0.00238	0.00147	0.00169	0.00065	0.00013	0.00185	0.00039
GXT_22533383	AK164350	GXL_175133	TRIM2	23321	NC_000004	chr4	+	154191539	154258249	4365	11	2.06e-30	1.49e-28	-1.01	down	121	91	172	265	99	257	0.01442	0.01328	0.0139	0.02868	0.02743	0.02807	0.01387	0.00047	0.02806	0.00051
GXT_22533456	AK031739	GXL_125267	KDR	3791	NC_000004	chr4	-	55944390	55958834	2774	9	0.00782	0.038	#NAME?	down	0	0	0	1	0	5	0	0	0	0.00018	0	0.0009	0	0	0.00036	0.00039
GXT_22533459	AK163495	GXL_164857	FGFR3	2261	NC_000004	chr4	+	1800991	1810408	3709	16	2.65e-06	3.38e-05	-1.68	down	9	5	11	24	11	27	0.00127	0.00073	0.00107	0.00294	0.00364	0.00336	0.00102	0.00022	0.00331	0.00029
GXT_22533684	AK134331	GXL_29994	STC1	6781	NC_000008	chr8	-	23700845	23709047	1915	2	8.83e-169	1.98e-165	-2.58	down	93	65	133	593	197	629	0.02505	0.02289	0.02503	0.15182	0.12535	0.16202	0.02432	0.00101	0.1464	0.01545
GXT_22533686	AK076280	GXL_29825	HR	55806	NC_000008	chr8	-	21972088	21981241	2857	14	9.75e-34	8.03e-32	-2.41	down	16	16	25	77	53	98	0.00267	0.00378	0.00304	0.0125	0.0204	0.01639	0.00316	0.00046	0.01643	0.00323
GXT_22533700	AK045383	GXL_67212	BAALC	79870	NC_000008	chr8	+	104225146	104244228	4174	2	3.39e-15	1.08e-13	1.38	up	75	93	117	40	15	36	0.00943	0.01495	0.01013	0.00474	0.00441	0.0043	0.0115	0.00245	0.00448	0.00019
GXT_22533792	AK142689	GXL_103335	P4HA2	8974	NC_000005	chr5	-	131528339	131543443	929	8	3.16e-39	3.32e-37	1.04	up	1062	947	1644	586	219	648	0.51947	0.58744	0.54171	0.26008	0.2535	0.29971	0.54954	0.0283	0.2711	0.02041
GXT_22534119	AK052244	GXL_57963	ITGA6	3655	NC_000002	chr2	+	173362742	173369715	1114	3	2.64e-29	1.81e-27	-1.19	down	130	102	197	305	125	352	0.05931	0.06172	0.06322	0.13173	0.13558	0.1547	0.06142	0.00161	0.14067	0.01004
GXT_22534553	AK136080	GXL_35035	SCIN	85477	NC_000007	chr7	+	12620684	12693282	2737	14	4.92e-07	7.07e-06	-1.4	down	17	14	14	33	22	39	0.00326	0.0032	0.00185	0.00519	0.00897	0.00626	0.00277	0.00065	0.00681	0.00159
GXT_22534645	AK135453	GXL_380839	EMP1	2012	NC_000012	chr12	+	13366416	13369532	2291	3	1.55e-115	1.22e-112	-1.29	down	8278	6651	13260	21923	9404	22732	1.88273	1.9333	2.07411	4.70558	4.99764	4.89812	1.96338	0.08097	4.86711	0.12123
GXT_22534705	AK163114	GXL_141529	TRHDE	29953	NC_000012	chr12	+	73050713	73059480	2722	2	0.00161	0.01	1.39	up	14	9	18	4	3	4	0.0026	0.00223	0.00239	0.00073	0.00135	0.00073	0.00241	0.00015	0.00094	0.00029
GXT_22534821	AK035168	GXL_89914	NECAB2	54550	NC_000016	chr16	+	84012103	84036273	1193	11	0.000706	0.00497	-1.5	down	5	4	3	10	4	17	0.00176	0.00226	0.00091	0.00374	0.00412	0.00682	0.00164	0.00056	0.00489	0.00137
GXT_22534843	AK014649	GXL_133610	LDHD	197257	NC_000016	chr16	-	75146210	75148829	1134	8	3.19e-06	4e-05	-1.7	down	7	4	16	27	10	28	0.00278	0.00238	0.0051	0.01006	0.00974	0.01117	0.00342	0.0012	0.01032	0.00061
GXT_22534849	AK159550	GXL_133685	RRAD	6236	NC_000016	chr16	-	66955610	66959132	1338	4	0.00141	0.00898	1.16	up	26	21	32	13	4	13	0.00941	0.01009	0.00864	0.00481	0.00367	0.00466	0.00938	0.00059	0.00438	0.00051
GXT_22536035	XM_001494167	GXL_57953	NOSTRIN	115677	NC_000002	chr2	+	169652855	169721480	1646	16	0.00903	0.0427	-1.19	down	3	7	7	12	7	12	0.00096	0.00205	0.00132	0.00331	0.00373	0.00303	0.00144	0.00045	0.00336	0.00029
GXT_22536389	XM_001379700	GXL_925488	DARC/CADM3	-2	NC_000001	chr1	+	159142920	159170712	1208	9	4.43e-73	1.33e-70	-1.93	down	74	55	136	303	139	323	0.03098	0.02985	0.03641	0.11047	0.12094	0.12075	0.03241	0.00286	0.11739	0.00489
GXT_22536557	XM_001370872	GXL_125267	KDR	3791	NC_000004	chr4	-	55946114	55987406	4051	30	0.00815	0.0393	-3.64	down	0	0	1	4	0	5	0	0	9e-05	0.00049	0	0.00061	3e-05	4e-05	0.00037	0.00026
GXT_22537043	XM_863070	GXL_172846	FOS	2353	NC_000014	chr14	+	75747281	75748930	1497	2	6.51e-56	1.21e-53	-1.46	down	119	112	204	368	167	407	0.04169	0.05049	0.04898	0.12186	0.1365	0.13519	0.04705	0.00384	0.13118	0.00661
GXT_22537156	XM_542723	GXL_169754	ENTPD3	956	NC_000003	chr3	+	40429275	40468992	1626	11	1.66e-11	3.93e-10	2.82	up	34	24	35	4	1	7	0.00903	0.00788	0.00689	0.00091	0.00076	0.00214	0.00793	0.00087	0.00127	0.00062
GXT_22537393	XM_854809	GXL_45947	ALOX15B	247	NC_000017	chr17	+	7949985	7951184	683	4	3.67e-05	0.000366	-2.23	down	1	3	3	16	4	9	0.00077	0.00197	0.00159	0.01161	0.00719	0.00656	0.00144	0.0005	0.00845	0.00225
GXT_22537473	XM_849719	GXL_15227	GLIPR2	152007	NC_000009	chr9	+	36139494	36162957	976	5	1.93e-38	1.97e-36	1.03	up	506	362	668	228	120	223	0.25086	0.2366	0.23124	0.1102	0.14117	0.10735	0.23957	0.00828	0.11957	0.01532
GXT_22537580	XM_544207	GXL_227923	MKX	283078	NC_000010	chr10	-	27964158	28033331	1334	7	1.48e-22	7.32e-21	-1.31	down	55	55	67	158	55	161	0.01987	0.02428	0.0176	0.05442	0.04694	0.05488	0.02058	0.00277	0.05208	0.00364
GXT_22537709	XM_843577	GXL_42491	PDGFRL	5157	NC_000008	chr8	+	17447135	17500605	1684	8	1.28e-12	3.32e-11	-1.5	down	19	13	25	48	19	65	0.00573	0.00521	0.0053	0.01346	0.01385	0.01893	0.00541	0.00023	0.01541	0.00249
GXT_22537713	XM_852844	GXL_42336	NRG1	3084	NC_000008	chr8	+	32617748	32621981	1027	3	7.83e-13	2.08e-11	2.17	up	45	39	60	8	3	17	0.02248	0.0252	0.02112	0.00386	0.00359	0.00824	0.02293	0.0017	0.00523	0.00213
GXT_22538005	XM_850653	GXL_779539	NR4A2/FLJ46875	-2	NC_000002	chr2	-	157180990	157183717	2189	3	0.00145	0.00918	-1.09	down	8	10	20	26	12	23	0.00192	0.00307	0.00314	0.00589	0.00673	0.00513	0.00271	0.00056	0.00592	0.00065
GXT_22538027	XM_843923	GXL_88986	HES6	55502	NC_000002	chr2	-	239147469	239149722	711	3	1.13e-05	0.000127	-1.43	down	7	11	24	26	19	36	0.00423	0.01043	0.01188	0.01813	0.02955	0.02452	0.00885	0.00332	0.02407	0.00467
GXT_22538414	XM_001508636	GXL_47213	IMPA2	3613	NC_000018	chr18	+	12009805	12030457	694	6	1e-42	1.21e-40	-1.28	down	184	165	298	494	223	508	0.12636	0.14764	0.13379	0.31321	0.34638	0.32393	0.13593	0.00882	0.32784	0.01382
GXT_22538760	XM_001170484	GXL_925488	DARC/CADM3	-2	NC_000001	chr1	+	159158484	159171487	2232	10	3.03e-130	3.26e-127	-1.9	down	129	99	208	493	230	526	0.0296	0.02945	0.03122	0.10126	0.11508	0.1101	0.03009	0.0008	0.10881	0.00571
GXT_22538813	XM_001160154	GXL_34958	SLC2A5	6518	NC_000001	chr1	-	9097001	9153544	2433	14	0.00793	0.0384	-1.35	down	3	4	7	13	5	10	0.00043	0.00083	0.00089	0.00245	0.00252	0.00183	0.00072	0.0002	0.00227	0.00031
GXT_22538814	XM_001159934	GXL_34958	SLC2A5	6518	NC_000001	chr1	-	9097001	9145213	2431	14	0.00793	0.0384	-1.35	down	3	4	7	13	5	10	0.00043	0.00083	0.00089	0.00245	0.00253	0.00183	0.00072	0.0002	0.00227	0.00031
GXT_22538914	XM_524774	GXL_228134	LPPR4	9890	NC_000001	chr1	+	99716320	99775146	5341	9	2.16e-05	0.000228	-1.26	down	14	9	15	32	12	30	0.00128	0.00101	0.00101	0.00297	0.00276	0.0028	0.0011	0.00013	0.00284	9e-05
GXT_22539218	XM_001146345	GXL_744221	CLMN	79789	NC_000014	chr14	-	95648283	95700721	12770	14	0.00206	0.0124	-1.44	down	7	3	3	8	5	17	0.00029	0.00016	8e-05	0.00031	0.00048	0.00062	0.00018	9e-05	0.00047	0.00013
GXT_22539282	XM_522940	GXL_480213	SERPINA9	327657	NC_000014	chr14	-	94929058	94942322	1696	5	3.57e-24	1.89e-22	1.56	up	116	108	149	47	16	43	0.03512	0.04209	0.03145	0.01345	0.01086	0.01233	0.03622	0.00441	0.01221	0.00106
GXT_22539400	XM_001138917	GXL_11808	LOC100131450	100131450	NC_000023	chrX	+	119254282	119261008	751	3	9.55e-05	0.000856	#NAME?	down	0	0	0	5	3	4	0	0	0	0.0033	0.0049	0.00265	0	0	0.00362	0.00095
GXT_22539624	XM_526351	GXL_181881	IGSF10	285313	NC_000003	chr3	-	151160768	151178263	6034	6	4.91e-19	1.97e-17	-2.1	down	21	8	23	82	29	60	0.00183	0.00089	0.00138	0.00674	0.0059	0.00495	0.00137	0.00038	0.00586	0.00073
GXT_22539694	XM_516321	GXL_193698	KAT2B	8850	NC_000003	chr3	+	20078667	20195893	4285	19	6.48e-68	1.69e-65	-1.64	down	87	76	155	336	126	323	0.00979	0.01086	0.01231	0.03722	0.0335	0.03545	0.01099	0.00103	0.03539	0.00152
GXT_22539711	XM_516648	GXL_119097	CD200	4345	NC_000003	chr3	+	112054400	112081774	2414	7	4.2e-06	5.15e-05	-1.07	down	11	18	30	51	12	42	0.00239	0.00502	0.00449	0.01007	0.0061	0.00856	0.00397	0.00114	0.00824	0.00164
GXT_22539806	XM_525316	GXL_132664	C20orf118	140711	NC_000020	chr20	+	35491781	35522634	2704	11	1.99e-46	2.69e-44	-1.95	down	59	32	76	230	82	195	0.0107	0.00751	0.0099	0.04079	0.03512	0.03458	0.00937	0.00136	0.03683	0.00281
GXT_22540175	XM_511538	GXL_36865	MPP2	4355	NC_000017	chr17	-	41953475	41989632	3671	14	1.45e-14	4.37e-13	1.19	up	109	77	182	54	23	45	0.01438	0.01322	0.01628	0.00689	0.00692	0.00575	0.01463	0.00126	0.00652	0.00054
GXT_22540191	XM_511425	GXL_102571	DHRS11	79154	NC_000017	chr17	+	34948728	34956922	1106	7	0.000267	0.00212	1.08	up	29	16	43	12	6	13	0.01233	0.00831	0.0123	0.00493	0.00489	0.0054	0.01098	0.00189	0.00507	0.00023
GXT_22540552	XM_001159058	GXL_15227	GLIPR2	152007	NC_000009	chr9	+	36138983	36163817	2102	7	3.58e-56	6.73e-54	1.04	up	831	622	1079	379	189	388	0.19759	0.19327	0.17802	0.08679	0.10585	0.08894	0.18963	0.00839	0.09386	0.00852
GXT_22540674	XM_001157073	GXL_40655	WASF3	10810	NC_000013	chr13	+	27187118	27260607	2222	9	2.01e-51	3.3e-49	-1.15	down	431	316	672	1053	420	985	0.09691	0.09057	0.1027	0.2216	0.21744	0.20984	0.09673	0.00495	0.21629	0.00487
GXT_22540727	XM_507953	GXL_197142	TLL2	7093	NC_000010	chr10	-	98124370	98273993	6966	22	0.00201	0.0121	1.39	up	12	16	33	12	1	8	0.00075	0.00145	0.00166	0.00071	0.00018	0.0005	0.00129	0.00039	0.00046	0.00022
GXT_22541104	XM_517285	GXL_33947	KIT	3815	NC_000004	chr4	+	55438052	55606881	5380	22	2.68e-16	9.15e-15	1.45	up	69	61	101	26	12	29	0.00644	0.00714	0.00634	0.00212	0.00251	0.00241	0.00664	0.00036	0.00235	0.00017
GXT_22541106	XM_001174613	GXL_164651	DOK7	285489	NC_000004	chr4	+	3468642	3502552	3243	17	0.000142	0.00121	-1.69	down	1	7	2	10	6	15	0.00016	0.00146	0.00015	0.00153	0.00227	0.0023	0.00059	0.00062	0.00203	0.00036
GXT_22541120	XM_512021	GXL_47342	APCDD1	147495	NC_000018	chr18	+	10468286	10488703	2203	5	1.51e-11	3.6e-10	1.58	up	63	64	76	31	7	22	0.01476	0.01928	0.01214	0.00698	0.0039	0.00452	0.01539	0.00295	0.00513	0.00133
GXT_22541217	XR_021770	GXL_172592	C8orf84	157869	NC_000008	chr8	-	73976794	74009942	4130	8	0.00417	0.0225	-1.3	down	6	5	14	17	10	16	0.00076	0.00065	0.00122	0.00204	0.00297	0.00181	0.00088	0.00025	0.00227	0.0005
GXT_22541297	XM_001150407	GXL_29994	STC1	6781	NC_000008	chr8	-	23699853	23717721	2409	3	3.6e-147	4.8e-144	-2.56	down	97	72	155	626	224	681	0.02111	0.02015	0.02324	0.12885	0.11413	0.14084	0.0215	0.00129	0.12794	0.01092
GXT_22541352	XM_001142615	GXL_42344	SLC7A2	6542	NC_000008	chr8	+	17335008	17422783	2399	14	1.57e-05	0.000171	-1.23	down	8	16	22	45	17	23	0.00153	0.00422	0.00316	0.00806	0.00768	0.00436	0.00297	0.00111	0.0067	0.00166
GXT_22541356	XM_528216	GXL_172608	SYBU	55638	NC_000008	chr8	-	110586212	110704782	3636	9	2.95e-09	5.55e-08	-1.37	down	28	16	28	55	31	55	0.0039	0.00285	0.00278	0.00736	0.01048	0.00744	0.00318	0.00051	0.00843	0.00145
GXT_22541421	XM_001157546	GXL_249853	GGT5	2687	NC_000022	chr22	-	24620964	24621610	375	3	3.17e-37	3.07e-35	-1.65	down	63	57	99	212	94	242	0.07767	0.08806	0.08409	0.24493	0.27122	0.27406	0.08327	0.00428	0.2634	0.01311
GXT_22541490	XM_001147630	GXL_249668	BAIAP2L2	80115	NC_000022	chr22	-	38480890	38507320	2422	16	5.07e-08	8.29e-07	-1.23	down	21	21	30	55	26	53	0.00412	0.00529	0.00418	0.01023	0.01065	0.00966	0.00453	0.00054	0.01018	0.00041
GXT_22541912	XM_001168864	GXL_262160	GPR77	27202	NC_000019	chr19	+	47843744	47845332	1413	2	1.86e-105	1.23e-102	-1.6	down	185	155	233	589	228	616	0.06868	0.07394	0.05958	0.20668	0.19809	0.21713	0.0674	0.00593	0.2073	0.00779
GXT_22542092	XM_515909	GXL_57963	ITGA6	3655	NC_000002	chr2	+	173290335	173371167	6108	27	3.06e-104	1.97e-101	-1.15	down	500	443	846	1226	531	1361	0.04013	0.04558	0.04621	0.09289	0.09824	0.10398	0.04397	0.00273	0.09837	0.00453
GXT_22542230	XM_516234	GXL_119544	IGFBP2	3485	NC_000002	chr2	+	217482054	217529164	1675	5	7.03e-129	7.38e-126	-1.41	down	3871	3216	5667	10908	4952	10708	1.15121	1.23144	1.16617	3.07697	3.44435	3.04393	1.18294	0.03483	3.18842	0.18147
GXT_22542301	XM_515284	GXL_42186	RNF144A	9781	NC_000002	chr2	+	7056909	7184310	5662	11	0.000114	0.001	-1.29	down	15	5	25	26	15	37	0.00139	0.0006	0.0016	0.00228	0.00325	0.00308	0.0012	0.00043	0.00287	0.00042
GXT_22542418	XM_515458	GXL_42223	EPCAM	4072	NC_000002	chr2	+	47596957	47614173	1672	9	0.00119	0.00775	-2.84	down	0	1	2	5	3	8	0	0.0004	0.00043	0.0015	0.0022	0.00238	0.00028	0.0002	0.00203	0.00038
GXT_22542480	XM_001166178	GXL_141180	LOC440028	440028	NC_000011	chr11	-	9778096	9785737	711	4	0.00715	0.0354	1.5	up	5	4	12	1	2	1	0.00369	0.00379	0.0061	0.0007	0.00345	0.0007	0.00453	0.00111	0.00162	0.0013
GXT_22542520	XM_001174786	GXL_38912	RELT	84957	NC_000011	chr11	+	73095387	73107194	2137	12	1.39e-10	3.01e-09	1.16	up	120	68	136	49	16	55	0.02671	0.02051	0.0209	0.01067	0.00862	0.01197	0.02271	0.00284	0.01042	0.00138
GXT_22542521	XM_522102	GXL_38912	RELT	84957	NC_000011	chr11	+	73095944	73107194	2041	11	8.79e-11	1.95e-09	1.15	up	119	68	136	49	16	55	0.02771	0.02147	0.02188	0.01117	0.00902	0.01253	0.02369	0.00285	0.01091	0.00144
GXT_22542604	XM_001147624	GXL_140993	TP53I11	9537	NC_000011	chr11	-	44955563	44994806	2318	12	3.92e-90	1.86e-87	-1.33	down	1243	1008	1725	3399	1317	3322	0.26793	0.2801	0.25729	0.6911	0.66603	0.67808	0.26844	0.00932	0.6784	0.01024
GXT_22542693	XM_001174833	GXL_39008	PLEKHB1	58473	NC_000011	chr11	+	73358981	73373864	1978	7	0.000208	0.0017	-1.63	down	7	3	8	22	8	12	0.00186	0.00102	0.00146	0.00551	0.00497	0.00302	0.00145	0.00034	0.0045	0.00107
GXT_22542824	XM_001135836	GXL_33472	STAG3L4	64940	NC_000007	chr7	+	66504962	66775565	1446	4	7.33e-08	1.18e-06	-1.35	down	18	18	21	41	27	44	0.00617	0.00793	0.00511	0.01277	0.01997	0.01357	0.0064	0.00116	0.01544	0.00322
GXT_22542825	XM_001141748	GXL_33472	STAG3L4	64940	NC_000007	chr7	+	66770974	66786509	1874	4	4.33e-09	7.98e-08	-1.27	down	30	24	40	60	40	69	0.00812	0.00828	0.00752	0.01488	0.02359	0.01686	0.00797	0.00033	0.01844	0.00373
GXT_22542826	XM_001135747	GXL_33472	STAG3L4	64940	NC_000007	chr7	+	66773920	66775565	1222	2	2.69e-05	0.000277	-1.23	down	15	15	20	34	22	32	0.00618	0.00791	0.00575	0.0131	0.01975	0.01242	0.00661	0.00093	0.01509	0.00331
GXT_22542832	XM_001148361	GXL_78393	PRKAR2B	5577	NC_000007	chr7	+	106684833	106802253	3659	12	3.07e-35	2.7e-33	-2.13	down	21	15	23	77	39	89	0.00287	0.00276	0.00212	0.01016	0.01307	0.01156	0.00258	0.00033	0.0116	0.00119
GXT_22542834	XM_001160764	GXL_97834	SEMA3A	10371	NC_000007	chr7	-	83587122	83692270	5503	15	0.00129	0.00835	1.34	up	17	13	25	6	3	8	0.00153	0.00147	0.00157	0.00054	0.00067	0.00072	0.00152	4e-05	0.00064	8e-05
GXT_22542840	XM_001147466	GXL_35035	SCIN	85477	NC_000007	chr7	+	12596240	12693228	2954	16	5.05e-08	8.26e-07	-1.42	down	18	15	15	35	24	42	0.0032	0.0032	0.00183	0.00514	0.00914	0.00606	0.00274	0.00065	0.00678	0.00171
GXT_22543054	XM_001163797	GXL_103715	P2RX7	5027	NC_000012	chr12	+	121592248	121624352	3750	12	0.000275	0.00218	-1.94	down	4	4	4	8	11	14	0.00056	0.00072	0.00039	0.00098	0.00327	0.0017	0.00056	0.00013	0.00198	0.00096
GXT_22543379	XM_001143391	GXL_133685	RRAD	6236	NC_000016	chr16	-	66955582	66961611	1579	6	0.00175	0.0108	1.08	up	26	25	34	13	5	16	0.00797	0.00982	0.00778	0.00407	0.00389	0.00473	0.00852	0.00092	0.00423	0.00036
GXT_22543708	NM_022605	GXL_925980	HPSE	10855	NC_000004	chr4	-	84213755	84223421	3175	3	3.15e-06	3.96e-05	-1.76	down	3	8	12	19	13	27	0.0005	0.0017	0.00137	0.00297	0.00503	0.00416	0.00119	0.00051	0.00405	0.00084
GXT_22543984	XR_007917	GXL_98576	GPR56	9289	NC_000016	chr16	+	57685411	57698164	2371	12	0.00471	0.025	2.03	up	7	6	9	2	1	1	0.00133	0.00142	0.00137	0.00042	0.00052	0.00021	0.00137	4e-05	0.00038	0.00013
GXT_22544342	XM_001236291	GXL_47287	GNAL	2774	NC_000018	chr18	+	11867167	11876703	395	4	0.00823	0.0396	#NAME?	down	0	0	0	2	1	3	0	0	0	0.00251	0.00311	0.00252	0	0	0.00271	0.00028
GXT_22544416	XM_423367	GXL_664109	DTX4	23220	NC_000011	chr11	+	58958586	58972381	701	5	0.00939	0.0441	-1.17	down	4	5	4	8	4	14	0.00299	0.00385	0.00206	0.00455	0.00525	0.00782	0.00297	0.00073	0.00587	0.00141
GXT_22544931	XM_001086807	GXL_193698	KAT2B	8850	NC_000003	chr3	+	20081309	20195890	4450	19	1.79e-69	4.93e-67	-1.67	down	85	71	151	325	125	319	0.0092	0.00978	0.01158	0.03475	0.03199	0.03369	0.01019	0.00101	0.03348	0.00114
GXT_22545249	XM_001089570	GXL_15310	FAM189A2	9413	NC_000009	chr9	+	71951127	72007372	2052	10	0.00146	0.00924	-1.06	down	16	4	23	29	10	28	0.00357	0.00131	0.00352	0.0058	0.00598	0.00631	0.0028	0.00105	0.00603	0.00021
GXT_22545256	XM_001105737	GXL_190074	ROR2	4920	NC_000009	chr9	-	94484888	94538898	3890	9	6.65e-19	2.65e-17	-1.87	down	17	21	38	73	48	82	0.00221	0.00364	0.00348	0.0093	0.01452	0.00984	0.00311	0.00064	0.01122	0.00234
GXT_22545267	XM_001102639	GXL_190101	EPB41L4B	54566	NC_000009	chr9	-	111934194	112043056	5101	26	6.16e-43	7.47e-41	1.64	up	151	118	232	58	18	55	0.01222	0.01181	0.01289	0.0042	0.00376	0.00438	0.01231	0.00045	0.00411	0.00026
GXT_22546236	XM_001093548	GXL_139840	LMO3	55885	NC_000012	chr12	-	16701219	16763527	3469	4	3.2e-15	1.02e-13	-2.38	down	6	4	12	38	15	32	0.00091	0.00078	0.00125	0.00515	0.00531	0.00459	0.00098	0.0002	0.00502	0.00031
GXT_22546238	XM_001093908	GXL_139840	LMO3	55885	NC_000012	chr12	-	16701219	16760321	3533	5	1.91e-15	6.16e-14	-2.39	down	6	4	12	39	15	32	0.00089	0.00076	0.00123	0.00519	0.00521	0.00451	0.00096	0.0002	0.00497	0.00033
GXT_22546239	XM_001093674	GXL_139840	LMO3	55885	NC_000012	chr12	-	16701219	16755130	3561	4	3.2e-15	1.02e-13	-2.38	down	6	4	12	38	15	32	0.00088	0.00076	0.00122	0.00501	0.00517	0.00447	0.00095	0.00019	0.00488	0.0003
GXT_22546354	XM_001103000	GXL_133610	LDHD	197257	NC_000016	chr16	-	75145748	75149759	1979	11	1.32e-09	2.58e-08	-1.56	down	11	11	20	39	16	44	0.00265	0.00341	0.00365	0.00877	0.00931	0.0102	0.00324	0.00043	0.00943	0.00059
GXT_22547044	NM_001046337	GXL_139840	LMO3	55885	NC_000012	chr12	-	16703673	16763460	1034	5	9.86e-05	0.000882	-2.27	down	0	3	5	14	6	9	0	0.00196	0.00175	0.00575	0.00712	0.00434	0.00124	0.00088	0.00574	0.00113
GXT_22734562	ENST00000397039	GXL_252201	ATP2A3	489	NC_000017	chr17	-	3827169	3867736	4162	23	0.00369	0.0203	-1.7	down	3	2	4	8	4	11	0.00038	0.00032	0.00035	0.00095	0.00118	0.0012	0.00035	2e-05	0.00111	0.00011
GXT_22734886	ENST00000247270	GXL_36752	EVI2A	2123	NC_000017	chr17	-	29644578	29648767	1860	3	0.00222	0.0132	1.21	up	12	4	27	5	3	4	0.00338	0.00145	0.00524	0.00133	0.00198	0.00107	0.00336	0.00155	0.00146	0.00038
GXT_22734887	ENST00000394756	GXL_36752	EVI2A	2123	NC_000017	chr17	-	29644676	29647449	1425	2	0.00416	0.0225	1.11	up	11	4	25	5	3	4	0.00405	0.00189	0.00634	0.00174	0.00258	0.0014	0.00409	0.00182	0.00191	0.0005
GXT_22734888	ENST00000394755	GXL_36752	EVI2A	2123	NC_000017	chr17	-	29644676	29648717	1571	2	0.00311	0.0176	1.17	up	11	4	27	5	3	4	0.00367	0.00172	0.00621	0.00158	0.00234	0.00127	0.00387	0.00184	0.00173	0.00045
GXT_22734926	ENST00000293272	GXL_36932	CCL5	6352	NC_000017	chr17	-	34198495	34207499	1352	3	4.77e-06	5.79e-05	2.22	up	27	18	19	7	1	5	0.01048	0.00848	0.00454	0.00257	0.00091	0.00147	0.00783	0.00247	0.00165	0.00069
GXT_22735739	ENST00000264833	GXL_3560	OLFM2	93145	NC_000019	chr19	-	9964438	10047228	1975	6	2.01e-07	3.05e-06	2.35	up	14	22	28	3	2	5	0.00345	0.00649	0.00505	0.00075	0.00124	0.00126	0.005	0.00124	0.00108	0.00024
GXT_22735771	ENST00000222120	GXL_3562	RAB3D	9545	NC_000019	chr19	-	11435094	11450321	1878	5	5.62e-13	1.51e-11	-1.59	down	16	8	18	45	10	54	0.00419	0.00287	0.00346	0.01094	0.00654	0.013	0.00351	0.00054	0.01016	0.00269
GXT_22736099	ENST00000347262	GXL_184421	PPP1R14A	94274	NC_000019	chr19	-	38741877	38747231	696	3	3.67e-149	5.03e-146	-1.32	down	995	685	1193	2387	1037	2206	0.68144	0.60615	0.56791	1.56724	1.68967	1.4506	0.6185	0.04716	1.56917	0.09761
GXT_22736189	ENST00000292077	GXL_189194	POU2F2	5452	NC_000019	chr19	-	42592675	42636630	4536	14	2.6e-05	0.000269	1.56	up	18	18	32	8	4	5	0.00197	0.00253	0.00247	0.00087	0.00108	0.00055	0.00232	0.00025	0.00083	0.00022
GXT_22736312	ENST00000300875	GXL_189108	DACT3	147906	NC_000019	chr19	-	47150869	47157914	2526	4	1.43e-06	1.91e-05	1.47	up	30	21	51	13	5	10	0.00623	0.00561	0.00729	0.00236	0.00243	0.00177	0.00638	0.00069	0.00219	0.0003
GXT_22736436	ENST00000391813	GXL_824867	SHANK1	50944	NC_000019	chr19	-	51165084	51192661	4785	9	3.41e-06	4.25e-05	1.63	up	17	13	39	3	4	8	0.00158	0.00183	0.00274	0.00031	0.00103	0.00083	0.00205	0.0005	0.00072	0.0003
GXT_22736554	ENST00000356532	GXL_189020	OSCAR	126014	NC_000019	chr19	-	54597935	54604083	1355	6	0.000382	0.0029	-1.04	down	15	13	18	29	15	31	0.00581	0.00647	0.0048	0.01061	0.01269	0.01066	0.00569	0.00069	0.01132	0.00097
GXT_22736775	ENST00000356518	GXL_122541	ADAM33	80332	NC_000020	chr20	-	3648617	3662893	3677	22	3.29e-05	0.000332	-1.44	down	12	7	16	19	16	34	0.00143	0.00128	0.00128	0.00229	0.00534	0.00433	0.00133	7e-05	0.00399	0.00127
GXT_22736777	ENST00000360630	GXL_122541	ADAM33	80332	NC_000020	chr20	-	3648631	3662656	2619	16	5.85e-05	0.000555	-1.47	down	10	7	12	16	14	30	0.00173	0.0018	0.00138	0.00275	0.00656	0.00543	0.00164	0.00018	0.00491	0.0016
GXT_22736904	ENST00000376727	GXL_122527	ACSS1	84532	NC_000020	chr20	-	24986874	25039616	3857	10	1.43e-05	0.000157	-1.16	down	19	9	17	34	11	39	0.00231	0.0014	0.0015	0.00399	0.0035	0.00491	0.00174	0.00041	0.00413	0.00058
GXT_22737047	ENST00000262878	GXL_122630	SAMHD1	25939	NC_000020	chr20	-	35518632	35580246	4784	16	0	0	-2.06	down	786	561	1238	3490	1526	3214	0.08104	0.07511	0.08841	0.34297	0.37067	0.31958	0.08152	0.00544	0.34441	0.02088
GXT_22737067	ENST00000373398	GXL_122652	KIAA1755	85449	NC_000020	chr20	-	36838907	36889174	6295	13	2.75e-20	1.18e-18	1.24	up	143	128	223	79	22	74	0.01122	0.01322	0.01236	0.00579	0.0041	0.00582	0.01227	0.00082	0.00524	0.0008
GXT_22737104	ENST00000372851	GXL_825326	RIMS4	140730	NC_000020	chr20	-	43380449	43438979	5203	6	1.84e-06	2.42e-05	-2.11	down	1	6	6	18	10	17	0.0001	0.00078	0.00042	0.00172	0.00236	0.00163	0.00043	0.00028	0.0019	0.00032
GXT_22737215	ENST00000371741	GXL_128461	KCNB1	3745	NC_000020	chr20	-	47984946	48099184	7318	2	6.27e-82	2.4e-79	-2.29	down	38	58	97	273	140	322	0.00272	0.0053	0.00476	0.01847	0.02349	0.02184	0.00426	0.00111	0.02127	0.00209
GXT_22737243	ENST00000396009	GXL_925584	NFATC2	4773	NC_000020	chr20	-	50003494	50159258	7437	10	7.46e-06	8.7e-05	1.27	up	49	34	61	23	5	24	0.00343	0.00299	0.00285	0.00153	0.00083	0.00161	0.00309	0.00025	0.00132	0.00035
GXT_22737695	ENST00000397841	GXL_163447	C21orf67	84536	NC_000021	chr21	-	46352729	46359828	2303	4	1.8e-20	7.81e-19	-1.26	down	77	52	107	162	84	185	0.01754	0.01522	0.01663	0.03488	0.04425	0.03958	0.01646	0.00095	0.03957	0.00383
GXT_22737696	ENST00000330551	GXL_163447	C21orf67	84536	NC_000021	chr21	-	46354640	46359760	1033	4	2.64e-11	6.16e-10	-1.35	down	30	16	46	69	34	70	0.01524	0.01049	0.01574	0.03314	0.03922	0.03279	0.01382	0.00237	0.03505	0.00295
GXT_22737769	ENST00000313755	GXL_249750	PRODH	5625	NC_000022	chr22	-	18900295	18909087	2961	6	0.00824	0.0396	#NAME?	down	0	0	0	4	1	1	0	0	0	0.00067	0.00041	0.00017	0	0	0.00042	0.0002
GXT_22737799	ENST00000043402	GXL_249679	RTN4R	65078	NC_000022	chr22	-	20228938	20256054	2157	2	0.00359	0.0198	#NAME?	down	0	0	0	3	0	4	0	0	0	0.00053	0	0.00092	0	0	0.00048	0.00038
GXT_22737858	ENST00000398292	GXL_249853	GGT5	2687	NC_000022	chr22	-	24615628	24641027	2408	12	1.32e-119	1.12e-116	-1.7	down	385	336	517	1259	606	1306	0.07512	0.08425	0.07112	0.2326	0.28143	0.24329	0.07683	0.00549	0.25244	0.02096
GXT_22738366	ENST00000228916	GXL_139760	SCNN1A	6337	NC_000012	chr12	-	6456015	6484715	3134	13	8.49e-06	9.79e-05	-1.53	down	11	5	17	32	13	25	0.00184	0.00108	0.00184	0.0049	0.00509	0.00366	0.00159	0.00036	0.00455	0.00063
GXT_22738367	ENST00000358945	GXL_139760	SCNN1A	6337	NC_000012	chr12	-	6457893	6484390	2137	12	0.00111	0.00735	-1.58	down	6	3	8	17	8	12	0.00147	0.00095	0.00118	0.00371	0.0046	0.00233	0.0012	0.00021	0.00355	0.00093
GXT_22738369	ENST00000338748	GXL_139760	SCNN1A	6337	NC_000012	chr12	-	6456015	6484390	3285	11	5.84e-06	6.97e-05	-1.57	down	10	6	17	31	15	25	0.0016	0.00123	0.00176	0.00453	0.00561	0.00349	0.00153	0.00022	0.00454	0.00087
GXT_22738438	ENST00000315330	GXL_139746	CLEC1A	51267	NC_000012	chr12	-	10222154	10251584	2684	6	0.00187	0.0114	#NAME?	down	0	0	0	2	2	4	0	0	0	0.00037	0.00046	0.00074	0	0	0.00052	0.00016
GXT_22738512	ENST00000261169	GXL_139840	LMO3	55885	NC_000012	chr12	-	16701355	16757823	3272	4	3.2e-15	1.02e-13	-2.38	down	6	4	12	38	15	32	0.00096	0.00082	0.00133	0.00546	0.00563	0.00487	0.00104	0.00022	0.00532	0.00033
GXT_22738515	ENST00000320122	GXL_139840	LMO3	55885	NC_000012	chr12	-	16701355	16753794	3180	3	1.82e-15	5.89e-14	-2.46	down	6	3	12	38	15	31	0.00099	0.00064	0.00136	0.00561	0.00579	0.00485	0.001	0.00029	0.00542	0.00041
GXT_22738562	ENST00000354417	GXL_139768	PTHLH	5744	NC_000012	chr12	-	28114825	28124916	952	5	0.00615	0.0312	3.02	up	6	4	6	1	0	1	0.00276	0.00283	0.0019	0.00052	0	0.00052	0.0025	0.00042	0.00035	0.00025
GXT_22738905	ENST00000393330	GXL_193932	TSPAN8	7103	NC_000012	chr12	-	71518869	71835678	1512	12	4.21e-06	5.16e-05	-1.64	down	14	5	5	23	13	24	0.00451	0.00178	0.00119	0.00689	0.00893	0.00692	0.00249	0.00145	0.00758	0.00095
GXT_22739111	ENST00000266943	GXL_159163	SLC46A3	283537	NC_000013	chr13	-	29274212	29292978	3178	6	2.43e-66	6.14e-64	1.38	up	832	616	1210	356	127	335	0.13419	0.12876	0.1334	0.05383	0.04903	0.0517	0.13212	0.0024	0.05152	0.00196
GXT_22739112	ENST00000399547	GXL_159163	SLC46A3	283537	NC_000013	chr13	-	29274220	29293150	3346	6	4.33e-65	1.07e-62	1.38	up	843	626	1235	362	130	337	0.12918	0.12431	0.12941	0.05201	0.04767	0.0494	0.12763	0.00235	0.04969	0.00178
GXT_22739164	ENST00000379743	GXL_159254	POSTN	10631	NC_000013	chr13	-	38136728	38172887	3196	22	3.92e-97	2.18e-94	1.25	up	13638	9349	20027	5744	2286	6282	1.99183	1.75406	2.01291	0.79513	0.78875	0.87308	1.9196	0.11737	0.81899	0.03834
GXT_22739165	ENST00000379749	GXL_159254	POSTN	10631	NC_000013	chr13	-	38136722	38172898	3210	22	1.29e-97	7.2e-95	1.25	up	13607	9339	19991	5717	2279	6245	1.97999	1.74561	2.00126	0.78859	0.78344	0.86482	1.90895	0.11583	0.81228	0.03721
GXT_22739203	ENST00000261488	GXL_159084	ENOX1	55068	NC_000013	chr13	-	43787654	44361044	2982	17	0.00294	0.0167	-1.17	down	8	7	12	14	10	22	0.00123	0.00136	0.00121	0.00233	0.00369	0.00284	0.00127	7e-05	0.00295	0.00056
GXT_22739543	ENST00000206514	GXL_155959	SLC7A8	23428	NC_000014	chr14	-	23596471	23652849	2249	11	5.09e-37	4.88e-35	-1.52	down	81	49	110	233	96	199	0.01704	0.01378	0.01639	0.0474	0.04749	0.04008	0.01574	0.00141	0.04499	0.00347
GXT_22739689	ENST00000395834	GXL_156034	CDKL1	8814	NC_000014	chr14	-	50796310	50862617	1587	9	8.33e-06	9.62e-05	-1.01	down	21	19	41	53	20	56	0.00661	0.00807	0.00797	0.01406	0.0147	0.01601	0.00755	0.00067	0.01492	0.00081
GXT_22739691	ENST00000356146	GXL_156034	CDKL1	8814	NC_000014	chr14	-	50802711	50883179	2982	20	0.00267	0.0154	-1.07	down	10	8	18	27	11	19	0.00158	0.00181	0.00185	0.00394	0.00435	0.00263	0.00175	0.00012	0.00364	0.00073
GXT_22739753	ENST00000267484	GXL_155893	RTN1	6252	NC_000014	chr14	-	60062695	60337684	3435	9	0.000616	0.0044	-1.26	down	5	7	4	19	4	14	0.00058	0.00126	0.00042	0.00251	0.00122	0.00177	0.00075	0.00036	0.00183	0.00053
GXT_22739963	ENST00000393088	GXL_101109	SERPINA1	5265	NC_000014	chr14	-	94844713	94856974	1829	7	0.0106	0.0487	-1.33	down	1	3	4	7	1	11	0.00029	0.00111	0.00059	0.0019	0.00067	0.003	0.00066	0.00034	0.00186	0.00095
GXT_22739969	ENST00000380365	GXL_480213	SERPINA9	327657	NC_000014	chr14	-	94929060	94936196	1643	4	1.75e-23	9.02e-22	1.58	up	117	110	151	47	16	43	0.0364	0.04391	0.0329	0.01388	0.01121	0.01273	0.03774	0.00459	0.01261	0.00109
GXT_22740202	ENST00000389812	GXL_225488	PLCB2	5330	NC_000015	chr15	-	40580100	40600174	3219	21	0.00404	0.022	-2.2	down	2	1	5	9	8	4	0.00032	0.00021	0.00056	0.00123	0.00229	0.00062	0.00036	0.00015	0.00138	0.00069
GXT_22740325	ENST00000260433	GXL_225666	CYP19A1	1588	NC_000015	chr15	-	51500255	51616121	4409	10	0.00269	0.0155	-1.31	down	0	7	7	18	4	9	0	0.00107	0.00041	0.00202	0.00111	0.00102	0.00049	0.00044	0.00138	0.00045
GXT_22740326	ENST00000396404	GXL_225666	CYP19A1	1588	NC_000015	chr15	-	51500255	51535147	4300	9	0.00269	0.0155	-1.31	down	0	7	7	18	4	9	0	0.0011	0.00042	0.00208	0.00114	0.00104	0.00051	0.00045	0.00142	0.00047
GXT_22740393	ENST00000178638	GXL_189865	CA12	771	NC_000015	chr15	-	63613577	63674360	6413	11	2.94e-66	7.44e-64	1.21	up	1884	1442	2755	903	349	831	0.14941	0.14663	0.1502	0.0678	0.06567	0.06193	0.14875	0.00153	0.06513	0.00243
GXT_22740394	ENST00000344366	GXL_189865	CA12	771	NC_000015	chr15	-	63616887	63674034	2744	10	8.02e-87	3.45e-84	1.23	up	1334	983	1890	613	243	553	0.24404	0.22991	0.23714	0.10606	0.10605	0.09429	0.23703	0.00577	0.10213	0.00555
GXT_22740652	ENST00000348070	GXL_4945	PCSK6	5046	NC_000015	chr15	-	101844134	102029873	4237	22	0.00298	0.0169	-1.42	down	2	6	5	14	6	9	0.00025	0.00095	0.00043	0.00156	0.00145	0.00106	0.00054	0.0003	0.00136	0.00021
GXT_22740653	ENST00000358417	GXL_4945	PCSK6	5046	NC_000015	chr15	-	101844134	102029873	4198	21	0.00298	0.0169	-1.42	down	2	6	5	14	6	9	0.00025	0.00096	0.00043	0.00158	0.00146	0.00107	0.00055	0.0003	0.00137	0.00022
GXT_22740654	ENST00000398185	GXL_4945	PCSK6	5046	NC_000015	chr15	-	101844134	101983869	3724	19	0.00119	0.00779	-1.7	down	2	4	5	13	6	9	0.00028	0.00072	0.00049	0.00164	0.00165	0.0012	0.0005	0.00018	0.0015	0.00021
GXT_22740872	ENST00000287706	GXL_76024	NTAN1	123803	NC_000016	chr16	-	15131710	15149921	1204	10	1.67e-36	1.56e-34	-1.12	down	312	198	429	641	269	682	0.1142	0.09687	0.11206	0.21974	0.23458	0.23801	0.10771	0.00771	0.23078	0.00793
GXT_22740900	ENST00000300571	GXL_76068	GPRC5B	51704	NC_000016	chr16	-	19868616	19896239	4610	4	1.78e-09	3.43e-08	1.57	up	37	22	62	9	6	15	0.0041	0.00307	0.00486	0.00097	0.0016	0.00155	0.00401	0.00073	0.00137	0.00029
GXT_22741153	ENST00000299759	GXL_133685	RRAD	6236	NC_000016	chr16	-	66955588	66959547	1569	5	0.00175	0.0108	1.08	up	26	25	34	13	5	16	0.00802	0.00988	0.00783	0.0041	0.00391	0.00476	0.00858	0.00092	0.00426	0.00036
GXT_22741199	ENST00000320623	GXL_133460	NQO1	1728	NC_000016	chr16	-	69743304	69760707	2765	6	3.63e-121	3.14e-118	-1.04	down	2489	1748	3546	5265	2109	5239	0.44257	0.40579	0.43537	0.89102	0.87641	0.89134	0.42791	0.01591	0.88626	0.00696
GXT_22741200	ENST00000379047	GXL_133460	NQO1	1728	NC_000016	chr16	-	69743304	69760449	2405	5	1e-58	2.05e-56	-1.04	down	2351	1644	3353	4975	1981	4962	0.4839	0.44176	0.47616	0.97359	0.95581	0.97617	0.46727	0.01832	0.96852	0.00905
GXT_22741440	ENST00000355701	GXL_36039	BZRAP1	9256	NC_000017	chr17	-	56378598	56406152	7626	31	6.14e-11	1.38e-09	-1.01	down	70	51	70	104	67	126	0.00454	0.00416	0.00324	0.00628	0.01046	0.00764	0.00398	0.00055	0.00813	0.00174
GXT_22741546	ENST00000226094	GXL_824591	FAM20A	54757	NC_000017	chr17	-	66533012	66597530	2955	11	3.09e-50	4.89e-48	-1.18	down	181	121	273	384	200	390	0.03008	0.0267	0.03106	0.05878	0.0781	0.06078	0.02928	0.00187	0.06589	0.00867
GXT_22741547	ENST00000375556	GXL_824591	FAM20A	54757	NC_000017	chr17	-	66533012	66536718	1044	4	5.99e-21	2.69e-19	-1.27	down	71	40	112	144	87	154	0.03385	0.02585	0.03617	0.06239	0.09876	0.06845	0.03196	0.00442	0.07653	0.01591
GXT_22741803	ENST00000397250	GXL_227885	IL15RA	3601	NC_000010	chr10	-	5995014	6019485	584	5	0.00398	0.0217	Inf	up	2	4	4	0	0	0	0.0018	0.00276	0.00186	0	0	0	0.00214	0.00044	0	0
GXT_22741808	ENST00000379971	GXL_227885	IL15RA	3601	NC_000010	chr10	-	5995115	6019470	588	5	0.0068	0.0339	Inf	up	1	4	4	0	0	0	0.00089	0.00274	0.00184	0	0	0	0.00182	0.00076	0	0
GXT_22741893	ENST00000378076	GXL_227900	ITGA8	8516	NC_000010	chr10	-	15555948	15762124	6755	30	2.6e-29	1.79e-27	-1.24	down	117	77	192	271	128	288	0.00838	0.00699	0.0092	0.01839	0.02217	0.01991	0.00819	0.00091	0.02016	0.00155
GXT_22741969	ENST00000375790	GXL_227923	MKX	283078	NC_000010	chr10	-	27961803	28034748	3606	7	1.2e-56	2.3e-54	-1.65	down	129	99	157	401	168	406	0.01808	0.01711	0.01548	0.05349	0.05587	0.05407	0.01689	0.00107	0.05448	0.00101
GXT_22742066	ENST00000343575	GXL_227906	CXCL12	6387	NC_000010	chr10	-	44872581	44880540	1857	3	8.31e-75	2.65e-72	1.28	up	1740	1312	2570	766	298	772	0.47703	0.46184	0.48911	0.19841	0.19376	0.20103	0.47599	0.01116	0.19773	0.00301
GXT_22742200	ENST00000395348	GXL_691308	SLC16A9	220963	NC_000010	chr10	-	61410523	61469837	4174	6	0.00862	0.0411	1.06	up	21	17	34	11	2	18	0.00239	0.00275	0.00286	0.00131	0.00059	0.00203	0.00267	0.0002	0.00131	0.00059
GXT_22742397	ENST00000372027	GXL_1222421	MMRN2	79812	NC_000010	chr10	-	88695297	88717372	4127	7	0.00916	0.0432	-1.4	down	4	3	10	14	7	10	0.00051	0.00049	0.00088	0.00168	0.00208	0.00121	0.00063	0.00018	0.00166	0.00036
GXT_22742453	ENST00000371247	GXL_197067	SORBS1	10580	NC_000010	chr10	-	97071531	97321135	7354	33	2.29e-95	1.21e-92	-2.29	down	56	38	68	284	97	264	0.00364	0.00321	0.0031	0.01786	0.01551	0.01625	0.00332	0.00023	0.01654	0.00098
GXT_22742455	ENST00000393949	GXL_197067	SORBS1	10580	NC_000010	chr10	-	97071531	97321135	6490	30	2.29e-95	1.21e-92	-2.29	down	56	38	68	284	97	264	0.00412	0.00364	0.00351	0.02024	0.01758	0.01842	0.00376	0.00026	0.01875	0.00111
GXT_22742456	ENST00000353505	GXL_197067	SORBS1	10580	NC_000010	chr10	-	97071531	97321135	6193	30	1.23e-100	7.22e-98	-2.31	down	53	35	66	279	93	250	0.0041	0.00348	0.00356	0.02081	0.01773	0.0182	0.00371	0.00028	0.01891	0.00135
GXT_22742457	ENST00000347291	GXL_197067	SORBS1	10580	NC_000010	chr10	-	97071531	97321135	6016	28	2.53e-101	1.51e-98	-2.33	down	52	35	65	278	93	249	0.00413	0.00359	0.00363	0.02134	0.01825	0.01866	0.00378	0.00025	0.01942	0.00137
GXT_22742459	ENST00000351042	GXL_197067	SORBS1	10580	NC_000010	chr10	-	97071531	97321135	5911	27	3.86e-101	2.3e-98	-2.32	down	52	35	65	277	93	249	0.00421	0.00365	0.00369	0.02164	0.01857	0.01899	0.00385	0.00026	0.01973	0.00136
GXT_22742461	ENST00000393945	GXL_197067	SORBS1	10580	NC_000010	chr10	-	97071531	97321135	5530	23	1.42e-104	9.33e-102	-2.33	down	50	33	65	275	90	237	0.00435	0.00366	0.00394	0.02295	0.01918	0.01941	0.00398	0.00028	0.02051	0.00173
GXT_22742462	ENST00000277982	GXL_197067	SORBS1	10580	NC_000010	chr10	-	97074782	97200919	3517	31	1.16e-32	9.2e-31	-2.1	down	23	21	31	112	36	125	0.00298	0.00345	0.00267	0.01339	0.01152	0.01445	0.00303	0.00032	0.01312	0.00121
GXT_22742463	ENST00000361941	GXL_197067	SORBS1	10580	NC_000010	chr10	-	97074782	97200919	3940	31	1.16e-32	9.2e-31	-2.1	down	23	21	31	112	36	125	0.00266	0.00308	0.00238	0.01195	0.01028	0.0129	0.00271	0.00029	0.01171	0.00108
GXT_22742465	ENST00000354106	GXL_197067	SORBS1	10580	NC_000010	chr10	-	97074816	97197313	3006	27	4.09e-29	2.78e-27	-2.07	down	23	21	31	108	36	122	0.00349	0.00404	0.00313	0.01501	0.01348	0.01657	0.00355	0.00037	0.01502	0.00126
GXT_22742466	ENST00000371241	GXL_197067	SORBS1	10580	NC_000010	chr10	-	97074816	97197313	2046	20	2.41e-33	1.96e-31	-2.13	down	17	16	28	99	29	95	0.0038	0.00428	0.00413	0.01987	0.01589	0.01837	0.00407	0.0002	0.01804	0.00164
GXT_22742748	ENST00000368904	GXL_691380	CUZD1	50624	NC_000010	chr10	-	124591665	124610309	2903	11	1.52e-05	0.000166	1.21	up	62	54	83	29	2	53	0.01069	0.01232	0.01021	0.00495	0.00085	0.00909	0.01107	0.0009	0.00496	0.00336
GXT_22742843	ENST00000397632	GXL_479522	SIGIRR	59307	NC_000011	chr11	-	405716	417325	1598	10	2.75e-19	1.12e-17	-1.06	down	94	54	119	173	84	163	0.02987	0.02279	0.026	0.05119	0.06146	0.05005	0.02622	0.00289	0.05423	0.00513
GXT_22742890	ENST00000382176	GXL_141142	DUSP8	1850	NC_000011	chr11	-	1575837	1576710	586	2	4.21e-05	0.000414	1.95	up	19	16	24	6	1	7	0.01701	0.01841	0.0148	0.00508	0.0021	0.00595	0.01674	0.00149	0.00438	0.00165
GXT_22742892	ENST00000331588	GXL_141142	DUSP8	1850	NC_000011	chr11	-	1575281	1587166	4455	6	1.88e-22	9.28e-21	1.39	up	130	96	177	56	19	50	0.01495	0.01436	0.01422	0.00612	0.00524	0.00548	0.01451	0.00032	0.00561	0.00037
GXT_22743062	ENST00000396673	GXL_141140	STK33	65975	NC_000011	chr11	-	8413418	8615503	2509	13	0.00232	0.0137	1.67	up	9	6	28	5	0	7	0.00188	0.00134	0.00374	0.00079	0	0.00139	0.00232	0.00103	0.00073	0.00057
GXT_22743063	ENST00000396672	GXL_141140	STK33	65975	NC_000011	chr11	-	8413418	8615503	2558	13	0.00205	0.0124	1.64	up	10	7	28	6	0	7	0.00205	0.00158	0.00367	0.00097	0	0.00136	0.00243	0.0009	0.00078	0.00057
GXT_22743083	ENST00000308763	GXL_664106	MRVI1	10335	NC_000011	chr11	-	10594638	10673848	5981	19	2.19e-64	5.31e-62	-1.21	down	779	576	1196	1914	771	1947	0.06543	0.0625	0.0692	0.15174	0.15187	0.15526	0.06571	0.00274	0.15296	0.00163
GXT_22743128	ENST00000278222	GXL_1222905	SAA2	6289	NC_000011	chr11	-	18252896	18258440	727	4	0.000176	0.00147	-4.67	down	0	0	1	8	3	3	0	0	0.0005	0.00236	0.00226	0.00128	0.00017	0.00024	0.00197	0.00049
GXT_22743215	ENST00000378880	GXL_141029	PAMR1	25891	NC_000011	chr11	-	35453370	35547579	3143	11	1.2e-58	2.45e-56	1.24	up	926	728	1301	411	178	396	0.14658	0.14909	0.14174	0.06091	0.0666	0.05843	0.1458	0.00305	0.06198	0.00342
GXT_22743364	ENST00000301770	GXL_41477	VWCE	220001	NC_000011	chr11	-	61026147	61062788	3151	20	1.02e-17	3.83e-16	1.66	up	61	54	83	21	9	20	0.00949	0.0107	0.0086	0.00315	0.00351	0.00301	0.0096	0.00086	0.00322	0.00021
GXT_22743635	ENST00000336898	GXL_161250	GDPD5	81544	NC_000011	chr11	-	75145685	75236948	3523	17	7.64e-26	4.44e-24	-1.09	down	167	111	202	363	136	321	0.02267	0.01914	0.01949	0.04773	0.04565	0.04292	0.02043	0.00159	0.04543	0.00197
GXT_22743637	ENST00000376270	GXL_161250	GDPD5	81544	NC_000011	chr11	-	75166367	75236867	1165	7	6.45e-09	1.17e-07	-1.04	down	47	23	50	85	30	84	0.01785	0.01069	0.0141	0.03518	0.02951	0.03247	0.01421	0.00292	0.03239	0.00232
GXT_22743638	ENST00000304771	GXL_161202	MAP6	4135	NC_000011	chr11	-	75297963	75380165	3334	4	1.5e-37	1.46e-35	-2.07	down	14	16	28	74	37	76	0.0022	0.00324	0.00292	0.011	0.01326	0.0109	0.00279	0.00043	0.01172	0.00109
GXT_22743677	ENST00000359152	GXL_161211	SYTL2	54843	NC_000011	chr11	-	85405784	85439071	5797	12	1.05e-10	2.32e-09	1.25	up	93	48	99	28	12	42	0.00787	0.00519	0.00595	0.00236	0.00254	0.00334	0.00634	0.00113	0.00275	0.00043
GXT_22743678	ENST00000354566	GXL_161211	SYTL2	54843	NC_000011	chr11	-	85405318	85437511	4751	13	1.67e-10	3.6e-09	1.12	up	102	54	108	35	17	43	0.0106	0.0071	0.00791	0.00365	0.00439	0.00419	0.00854	0.0015	0.00408	0.00031
GXT_22743699	ENST00000263317	GXL_161380	NOX4	50507	NC_000011	chr11	-	89059512	89224653	2388	18	0.00612	0.0311	1.28	up	20	5	18	8	2	4	0.00417	0.00113	0.00242	0.00145	0.00078	0.00083	0.00257	0.00125	0.00102	0.0003
GXT_22743717	ENST00000393234	GXL_161376	SESN3	143686	NC_000011	chr11	-	94915322	94964246	1176	7	1.32e-17	4.9e-16	-1.67	down	23	17	33	94	27	68	0.01026	0.00917	0.00938	0.03654	0.0261	0.02557	0.0096	0.00047	0.0294	0.00505
GXT_22743763	ENST00000375704	GXL_161291	CARD16	114769	NC_000011	chr11	-	104912250	104916103	613	4	0.00549	0.0284	-1.26	down	5	5	4	12	5	12	0.00428	0.0055	0.00236	0.0089	0.00801	0.00894	0.00405	0.00129	0.00862	0.00043
GXT_22743769	ENST00000282249	GXL_1223609	GUCY1A2	2977	NC_000011	chr11	-	106557910	106889171	3047	9	0.000398	0.00301	2.67	up	9	10	12	4	0	1	0.00155	0.00221	0.0013	0.00033	0	0.00016	0.00169	0.00038	0.00016	0.00013
GXT_22744311	ENST00000381418	GXL_29825	HR	55806	NC_000008	chr8	-	21971928	21989381	6335	19	9.61e-54	1.66e-51	-2.44	down	29	27	39	149	85	166	0.0022	0.00287	0.00211	0.01101	0.01521	0.01255	0.00239	0.00034	0.01292	0.00173
GXT_22744652	ENST00000377707	GXL_827212	SHB/CKAP2	-2	NC_000009	chr9	-	37919131	38069208	2783	6	8.51e-44	1.06e-41	1.05	up	397	303	558	201	74	219	0.07157	0.06977	0.06906	0.03403	0.03132	0.03687	0.07013	0.00106	0.03407	0.00227
GXT_22744797	ENST00000376422	GXL_190105	FRMD3	257019	NC_000009	chr9	-	85912686	86153353	1323	13	0.00549	0.0284	-2.63	down	1	0	1	4	0	7	0.0004	0	0.00027	0.00112	0	0.00226	0.00022	0.00017	0.00113	0.00092
GXT_22744869	ENST00000375715	GXL_190074	ROR2	4920	NC_000009	chr9	-	94325373	94711162	2993	13	2.08e-12	5.3e-11	-1.69	down	11	15	30	51	29	53	0.00175	0.00338	0.00355	0.00845	0.01108	0.00788	0.00289	0.00081	0.00914	0.00139
GXT_22744916	ENST00000375290	GXL_190012	PTCH1	5727	NC_000009	chr9	-	98205262	98269699	7744	24	1.46e-20	6.4e-19	-1.22	down	75	57	99	151	77	197	0.00495	0.00461	0.00439	0.00901	0.01123	0.01148	0.00465	0.00023	0.01057	0.00111
GXT_22744921	ENST00000375274	GXL_190012	PTCH1	5727	NC_000009	chr9	-	98209194	98270643	4344	23	1.17e-14	3.57e-13	-1.14	down	47	37	67	99	42	128	0.00543	0.00512	0.00516	0.01039	0.01017	0.01261	0.00524	0.00014	0.01106	0.0011
GXT_22745017	ENST00000374566	GXL_190101	EPB41L4B	54566	NC_000009	chr9	-	111934255	112083244	5800	26	2.79e-40	3.07e-38	1.67	up	160	122	250	61	18	58	0.01156	0.01068	0.0124	0.00391	0.00331	0.00411	0.01155	0.0007	0.00378	0.00034
GXT_22745018	ENST00000374557	GXL_190101	EPB41L4B	54566	NC_000009	chr9	-	112002174	112083244	3843	16	3.18e-54	5.56e-52	1.68	up	389	304	620	146	51	130	0.04846	0.04784	0.05303	0.01664	0.01533	0.01537	0.04978	0.00231	0.01578	0.00061
GXT_22745019	ENST00000311609	GXL_190101	EPB41L4B	54566	NC_000009	chr9	-	112002011	112069550	3254	16	1.54e-54	2.72e-52	1.67	up	382	301	606	143	51	127	0.0561	0.05618	0.06118	0.01926	0.01811	0.01769	0.05782	0.00238	0.01835	0.00066
GXT_22745369	ENST00000371867	GXL_12823	SARDH	1757	NC_000009	chr9	-	136583444	136599165	1326	7	0.00402	0.0219	-1.17	down	10	4	18	22	10	19	0.00396	0.00203	0.00422	0.0071	0.00833	0.00676	0.0034	0.00098	0.0074	0.00067
GXT_22745370	ENST00000393050	GXL_12823	SARDH	1757	NC_000009	chr9	-	136583781	136605077	1412	8	0.0012	0.00785	-1.19	down	13	7	19	25	15	23	0.00483	0.00334	0.00422	0.00773	0.01217	0.00776	0.00413	0.00061	0.00922	0.00209
GXT_22745371	ENST00000298628	GXL_12823	SARDH	1757	NC_000009	chr9	-	136590515	136605077	1484	7	0.00106	0.00707	-1.25	down	11	6	16	22	13	21	0.00389	0.00273	0.00341	0.00676	0.01029	0.00692	0.00334	0.00048	0.00799	0.00163
GXT_22746303	ENST00000356757	GXL_40132	TMEM217	221468	NC_000006	chr6	-	37179956	37225399	1489	3	0.00576	0.0295	1.04	up	16	14	26	10	4	7	0.00564	0.00543	0.00631	0.00333	0.00326	0.00234	0.00579	0.00038	0.00298	0.00045
GXT_22746397	ENST00000372485	GXL_39982	DLK2	65989	NC_000006	chr6	-	43418090	43423328	1572	6	0.00474	0.0251	-1.62	down	2	4	4	7	6	11	0.00067	0.00172	0.00092	0.00221	0.00391	0.00327	0.0011	0.00045	0.00313	0.0007
GXT_22746440	ENST00000330430	GXL_40005	RCAN2	10231	NC_000006	chr6	-	46188475	46293405	3186	4	3.48e-57	6.77e-55	-1.09	down	409	283	595	877	355	922	0.06595	0.05671	0.06595	0.13398	0.13258	0.14195	0.06287	0.00436	0.13617	0.00413
GXT_22746441	ENST00000371374	GXL_40005	RCAN2	10231	NC_000006	chr6	-	46188475	46459099	3327	5	4.17e-52	7.01e-50	-1.06	down	457	320	650	967	390	1001	0.07065	0.06182	0.06891	0.14165	0.13921	0.1474	0.06713	0.00382	0.14275	0.00343
GXT_22746442	ENST00000306764	GXL_40005	RCAN2	10231	NC_000006	chr6	-	46188475	46459709	3240	5	1.66e-53	2.85e-51	-1.07	down	446	314	640	959	383	988	0.07076	0.06223	0.06977	0.14423	0.14044	0.14952	0.06759	0.00381	0.14473	0.00372
GXT_22746443	ENST00000275016	GXL_39988	CYP39A1	51302	NC_000006	chr6	-	46517541	46620523	2176	12	1.2e-05	0.000133	-1.29	down	15	9	20	42	15	26	0.00338	0.00248	0.00282	0.0082	0.00733	0.00549	0.00289	0.00037	0.00701	0.00113
GXT_22746565	ENST00000355773	GXL_40039	SLC17A5	26503	NC_000006	chr6	-	74303102	74363878	3455	11	1.19e-151	1.78e-148	-2.03	down	329	256	472	1389	590	1421	0.0485	0.04546	0.04779	0.18822	0.19812	0.19564	0.04725	0.0013	0.19399	0.00421
GXT_22746594	ENST00000369756	GXL_483289	FAM46A	55603	NC_000006	chr6	-	82455447	82462491	5537	3	2.61e-90	1.24e-87	1.21	up	1200	879	1973	580	211	600	0.11319	0.10684	0.12808	0.05179	0.04655	0.05368	0.11604	0.0089	0.05067	0.00302
GXT_22746595	ENST00000369754	GXL_483289	FAM46A	55603	NC_000006	chr6	-	82455447	82462425	5664	3	1.57e-88	7.06e-86	1.21	up	1224	889	2007	591	214	605	0.11262	0.10556	0.12725	0.05147	0.04595	0.05276	0.11514	0.00903	0.05006	0.00295
GXT_22746787	ENST00000327673	GXL_190660	COL10A1	1300	NC_000006	chr6	-	116440189	116447063	3498	2	0.000164	0.00138	1.28	up	27	19	38	14	4	10	0.00405	0.00366	0.00392	0.00198	0.0014	0.00142	0.00388	0.00016	0.0016	0.00027
GXT_22747001	ENST00000222803	GXL_12429	FKBP14	55033	NC_000007	chr7	-	30050203	30066300	4960	4	1.23e-108	8.43e-106	-1.61	down	408	320	641	1407	512	1427	0.04277	0.04282	0.04603	0.13744	0.12326	0.14116	0.04387	0.00153	0.13395	0.00771
GXT_22747070	ENST00000242208	GXL_926281	INHBA	3624	NC_000007	chr7	-	41724712	41742706	6064	3	3.14e-69	8.61e-67	1.08	up	3269	2415	4960	1642	659	1648	0.2813	0.26786	0.2946	0.13375	0.13318	0.13435	0.28125	0.01092	0.13376	0.00048
GXT_22747272	ENST00000222390	GXL_97727	HGF	3082	NC_000007	chr7	-	81328322	81399514	5989	18	1.24e-59	2.59e-57	2.32	up	123	100	152	23	13	21	0.01007	0.01025	0.00863	0.00182	0.00266	0.00166	0.00965	0.00072	0.00205	0.00044
GXT_22747274	ENST00000394769	GXL_97727	HGF	3082	NC_000007	chr7	-	81372241	81399449	1053	8	1.14e-10	2.5e-09	2.13	up	32	38	36	9	4	7	0.01445	0.02049	0.01235	0.00377	0.00466	0.00283	0.01576	0.00345	0.00375	0.00075
GXT_22747302	ENST00000380079	GXL_97719	STEAP4	79689	NC_000007	chr7	-	87900207	87936206	9988	5	0	0	-4.21	down	74	32	104	1145	554	1157	0.00383	0.00216	0.00373	0.05618	0.06723	0.05699	0.00324	0.00076	0.06013	0.00503
GXT_22747303	ENST00000301959	GXL_97719	STEAP4	79689	NC_000007	chr7	-	87907343	87936203	2321	4	2.37e-240	1.35e-236	-4.09	down	28	21	47	492	249	481	0.0061	0.0061	0.00725	0.1032	0.12912	0.10144	0.00648	0.00054	0.11125	0.01265
GXT_22747521	ENST00000313070	GXL_182336	CADPS2	93664	NC_000007	chr7	-	121958481	122526391	5566	29	2.88e-14	8.5e-13	-1.08	down	46	38	65	98	42	114	0.00415	0.00424	0.0037	0.00748	0.00865	0.00877	0.00403	0.00024	0.0083	0.00058
GXT_22747779	ENST00000240100	GXL_29907	DUSP4	1846	NC_000008	chr8	-	29190581	29208185	5537	4	1.28e-72	3.79e-70	-2.11	down	69	60	112	329	155	315	0.00654	0.00724	0.00731	0.02942	0.03437	0.02815	0.00703	0.00035	0.03065	0.00268
GXT_22747780	ENST00000240101	GXL_29907	DUSP4	1846	NC_000008	chr8	-	29194056	29206322	2959	5	6.74e-31	4.98e-29	-1.92	down	27	22	29	100	43	98	0.00479	0.00501	0.00354	0.01676	0.01784	0.01633	0.00445	0.00065	0.01698	0.00064
GXT_22748040	ENST00000220931	GXL_172559	NCALD	83988	NC_000008	chr8	-	102698955	102803189	3283	4	1.06e-14	3.23e-13	-1.07	down	55	38	61	120	40	107	0.00878	0.00771	0.00666	0.01805	0.01498	0.01593	0.00772	0.00087	0.01632	0.00128
GXT_22748087	ENST00000303924	GXL_172743	HAS2	3037	NC_000008	chr8	-	122624356	122653630	4190	4	1.09e-161	2.17e-158	1.8	up	4267	2997	6487	1208	494	1415	0.52812	0.4743	0.55182	0.14101	0.14152	0.16547	0.51808	0.03243	0.14933	0.01141
GXT_22748105	ENST00000378017	GXL_172547	MTSS1	9788	NC_000008	chr8	-	125563031	125740259	4458	14	4.18e-39	4.37e-37	-1.13	down	235	176	346	567	216	529	0.02683	0.02611	0.02686	0.06083	0.05757	0.05657	0.0266	0.00035	0.05832	0.00182
GXT_22748150	ENST00000395218	GXL_172591	PTK2	5747	NC_000008	chr8	-	141668501	142011332	4315	31	5.77e-83	2.29e-80	1.14	up	1317	983	1956	627	229	703	0.1428	0.13681	0.14578	0.06634	0.0597	0.07206	0.1418	0.00373	0.06603	0.00505
GXT_22748151	ENST00000354438	GXL_172591	PTK2	5747	NC_000008	chr8	-	141668501	142011332	4478	32	3.78e-80	1.41e-77	1.16	up	1355	1009	2023	638	230	720	0.14165	0.13529	0.1456	0.06493	0.05765	0.0712	0.14085	0.00425	0.06459	0.00554
GXT_22748152	ENST00000342207	GXL_172591	PTK2	5747	NC_000008	chr8	-	141744796	141843114	1657	19	3.99e-42	4.73e-40	1.19	up	412	318	634	191	70	222	0.10874	0.10786	0.11918	0.05009	0.04335	0.05508	0.11193	0.00514	0.04951	0.00481
GXT_22748303	ENST00000316715	GXL_219480	GPM6B	2824	NC_000023	chrX	-	13789150	13835461	3275	8	7.3e-20	3.06e-18	-1.14	down	68	73	104	181	79	175	0.01041	0.01432	0.0111	0.02619	0.028	0.026	0.01194	0.0017	0.02673	0.0009
GXT_22748305	ENST00000355135	GXL_219480	GPM6B	2824	NC_000023	chrX	-	13792073	13835188	1673	8	8.44e-22	4.02e-20	-1.34	down	63	51	79	172	69	152	0.01881	0.01935	0.01634	0.0486	0.04747	0.04405	0.01817	0.00131	0.04671	0.00193
GXT_22748338	ENST00000360011	GXL_219418	RAI2	10742	NC_000023	chrX	-	17818171	17878827	2377	3	0.00143	0.00909	-1.23	down	9	4	7	15	5	20	0.00199	0.00115	0.00106	0.00313	0.00258	0.00419	0.0014	0.00042	0.0033	0.00067
GXT_22748345	ENST00000379869	GXL_219526	GPR64	10149	NC_000023	chrX	-	19007432	19140677	4768	29	2.55e-36	2.36e-34	-2.72	down	13	10	20	88	42	86	0.00132	0.00141	0.00144	0.00857	0.00953	0.0083	0.00139	5e-05	0.0088	0.00053
GXT_22748347	ENST00000379878	GXL_219526	GPR64	10149	NC_000023	chrX	-	19007427	19140755	4828	28	4.33e-36	3.96e-34	-2.7	down	13	10	20	88	41	86	0.0013	0.0014	0.00142	0.00846	0.00928	0.00819	0.00137	5e-05	0.00864	0.00046
GXT_22748348	ENST00000356606	GXL_219526	GPR64	10149	NC_000023	chrX	-	19007433	19140582	4630	28	1.32e-36	1.25e-34	-2.7	down	13	10	20	88	41	85	0.00136	0.00146	0.00148	0.00882	0.00963	0.0085	0.00143	5e-05	0.00898	0.00048
GXT_22748349	ENST00000354791	GXL_219526	GPR64	10149	NC_000023	chrX	-	19007427	19140755	4803	28	4.33e-36	3.96e-34	-2.7	down	13	10	20	88	41	86	0.00131	0.0014	0.00143	0.0085	0.00933	0.00823	0.00138	5e-05	0.00869	0.00047
GXT_22748352	ENST00000351402	GXL_219526	GPR64	10149	NC_000023	chrX	-	19007427	19140755	4494	25	9.29e-39	9.56e-37	-2.97	down	10	7	18	86	39	79	0.00117	0.00105	0.00137	0.00887	0.00965	0.00809	0.0012	0.00013	0.00887	0.00064
GXT_22748353	ENST00000360279	GXL_219526	GPR64	10149	NC_000023	chrX	-	19007432	19140677	4703	27	1.35e-36	1.27e-34	-2.69	down	13	10	20	88	40	86	0.00134	0.00143	0.00146	0.00869	0.00935	0.00841	0.00141	5e-05	0.00882	0.00039
GXT_22748871	ENST00000372045	GXL_89699	CHRDL1	91851	NC_000023	chrX	-	109917084	110038993	3860	12	7.19e-90	3.38e-87	-1.67	down	62	57	120	231	90	287	0.00836	0.00951	0.01095	0.02848	0.02755	0.03665	0.00961	0.00106	0.03089	0.00409
GXT_22748872	ENST00000218054	GXL_89699	CHRDL1	91851	NC_000023	chrX	-	109918477	110038993	2467	12	3.67e-46	4.9e-44	-1.64	down	41	39	83	164	57	188	0.00861	0.00996	0.01171	0.0311	0.02668	0.03735	0.01009	0.00127	0.03171	0.00438
GXT_22748964	ENST00000307484	GXL_89692	APLN	8862	NC_000023	chrX	-	128779326	128788914	3115	3	1.97e-06	2.58e-05	-1.03	down	30	20	37	56	24	61	0.00505	0.00411	0.00429	0.00891	0.00947	0.00959	0.00448	0.00041	0.00932	0.0003
GXT_22749025	ENST00000305963	GXL_89719	MMGT1	93380	NC_000023	chrX	-	135044229	135056222	3738	4	6.61e-87	2.85e-84	-1.19	down	253	195	395	651	254	607	0.03509	0.03463	0.03741	0.08476	0.08243	0.07953	0.03571	0.00122	0.08224	0.00214
GXT_22749133	ENST00000370060	GXL_1239890	ARHGAP4	393	NC_000023	chrX	-	153126969	153151600	5113	29	0.00476	0.0252	-3.36	down	0	1	0	4	3	3	0	5e-05	0	0.00039	0.00048	0.00019	2e-05	2e-05	0.00035	0.00012
GXT_22749136	ENST00000370055	GXL_1239890	ARHGAP4	393	NC_000023	chrX	-	153127408	153151608	4655	27	0.00476	0.0252	-3.36	down	0	1	0	4	3	3	0	6e-05	0	0.00043	0.00053	0.00021	2e-05	3e-05	0.00039	0.00013
GXT_22749284	ENST00000254354	GXL_75791	MATN3	4148	NC_000002	chr2	-	20192872	20212455	1526	8	7.51e-14	2.16e-12	-1.15	down	51	30	80	118	52	96	0.0165	0.01281	0.01799	0.03605	0.03942	0.03003	0.01577	0.00218	0.03517	0.00388
GXT_22749424	ENST00000332839	GXL_75598	SLC8A1	6546	NC_000002	chr2	-	40342393	40657420	2922	10	5.08e-25	2.83e-23	1.06	up	323	281	516	180	68	182	0.05727	0.0623	0.06176	0.03036	0.02773	0.0301	0.06044	0.00225	0.0294	0.00118
GXT_22749425	ENST00000378715	GXL_75598	SLC8A1	6546	NC_000002	chr2	-	40339286	40680684	6190	11	5.53e-61	1.22e-58	1.02	up	692	555	1072	371	147	391	0.05828	0.05926	0.0616	0.0296	0.02876	0.03103	0.05971	0.00139	0.0298	0.00094
GXT_22749829	ENST00000383817	GXL_13795	CIDEC	63924	NC_000003	chr3	-	9908399	9920740	929	4	5.99e-13	1.6e-11	-1.68	down	8	14	28	57	22	44	0.00452	0.00958	0.01061	0.02745	0.02907	0.02248	0.00824	0.00266	0.02633	0.0028
GXT_22749903	ENST00000356447	GXL_744718	THRB	7068	NC_000003	chr3	-	24159705	24536313	6341	10	7.06e-07	9.9e-06	-1.5	down	13	10	22	33	21	39	0.00108	0.00106	0.00123	0.00258	0.00407	0.00306	0.00112	8e-05	0.00324	0.00062
GXT_22749912	ENST00000295720	GXL_13873	NEK10	152110	NC_000003	chr3	-	27151576	27257966	2871	17	0.000193	0.00159	1.15	up	26	21	32	8	7	11	0.0042	0.00446	0.00378	0.00121	0.00299	0.00173	0.00415	0.00028	0.00198	0.00075
GXT_22749913	ENST00000383771	GXL_13873	NEK10	152110	NC_000003	chr3	-	27152394	27257966	2023	16	7.5e-05	0.000693	1.61	up	21	15	26	5	3	8	0.00466	0.00453	0.00429	0.00098	0.00182	0.00172	0.00449	0.00015	0.00151	0.00037
GXT_22749914	ENST00000383770	GXL_13873	NEK10	152110	NC_000003	chr3	-	27152404	27257966	1872	15	0.000105	0.000932	1.59	up	21	15	25	5	3	8	0.00504	0.0049	0.00444	0.00106	0.00197	0.00186	0.00479	0.00026	0.00163	0.00041
GXT_22750589	ENST00000282466	GXL_181881	IGSF10	285313	NC_000003	chr3	-	151151282	151176497	11067	6	9.95e-30	7.01e-28	-1.96	down	32	12	41	115	43	90	0.00152	0.00073	0.00134	0.00515	0.00477	0.00405	0.0012	0.00034	0.00466	0.00046
GXT_22750618	ENST00000334256	GXL_925893	KPNA4	3840	NC_000003	chr3	-	160212783	160283376	8981	17	2.45e-91	1.19e-88	-1.02	down	630	483	958	1370	522	1459	0.03473	0.03412	0.0363	0.07136	0.06658	0.07603	0.03505	0.00092	0.07132	0.00386
GXT_22750896	ENST00000400045	GXL_125095	ABLIM2	84448	NC_000004	chr4	-	7967043	8160559	3753	20	0.00081	0.00559	-2.4	down	2	0	4	10	3	9	0.00028	0	0.00039	0.00092	0.00098	0.00119	0.00022	0.00016	0.00103	0.00012
GXT_22750897	ENST00000341937	GXL_125095	ABLIM2	84448	NC_000004	chr4	-	7968029	8160481	2589	19	0.00849	0.0406	-2.1	down	2	0	4	9	3	5	0.00041	0	0.00056	0.00115	0.00142	0.00096	0.00032	0.00024	0.00118	0.00019
GXT_22750900	ENST00000318888	GXL_125095	ABLIM2	84448	NC_000004	chr4	-	7967043	8160559	3587	19	0.00131	0.00843	-2.35	down	2	0	4	10	3	8	0.00029	0	0.0004	0.00097	0.00103	0.00111	0.00023	0.00017	0.00104	6e-05
GXT_22750924	ENST00000399920	GXL_125150	TAPT1	202018	NC_000004	chr4	-	16192294	16228072	1044	2	0.00607	0.0309	-1.07	down	4	7	12	20	6	13	0.00136	0.00426	0.00333	0.00844	0.00497	0.00529	0.00298	0.00121	0.00623	0.00157
GXT_22750999	ENST00000273857	GXL_125298	CORIN	10699	NC_000004	chr4	-	47596015	47839966	4852	22	1.35e-85	5.63e-83	-1.46	down	560	413	833	1694	660	1545	0.05521	0.05392	0.05802	0.15997	0.15603	0.14762	0.05572	0.00171	0.15454	0.00515
GXT_22751022	ENST00000263923	GXL_125267	KDR	3791	NC_000004	chr4	-	55944644	55991756	5831	30	0.000661	0.00469	-4.05	down	0	0	1	4	0	8	0	0	6e-05	0.00034	0	0.00068	2e-05	3e-05	0.00034	0.00028
GXT_22751086	ENST00000395743	GXL_125091	BTC	685	NC_000004	chr4	-	75669969	75719896	2816	6	0.00129	0.00835	-2.34	down	1	1	3	12	3	4	0.00019	0.00024	0.00038	0.00194	0.00131	0.00071	0.00027	8e-05	0.00132	0.0005
GXT_22751138	ENST00000282709	GXL_220918	SCD5	79966	NC_000004	chr4	-	83619200	83720010	719	3	8.68e-08	1.38e-06	-1.01	down	39	27	47	81	31	70	0.02653	0.02404	0.02224	0.05109	0.04886	0.04583	0.02427	0.00176	0.04859	0.00216
GXT_22751199	ENST00000354704	GXL_220916	ADH6	130	NC_000004	chr4	-	100123795	100140403	2667	8	0.00948	0.0444	-1.28	down	6	4	5	13	6	10	0.00118	0.00101	0.00068	0.00242	0.00276	0.00187	0.00096	0.00021	0.00235	0.00037
GXT_22751200	ENST00000394897	GXL_220916	ADH6	130	NC_000004	chr4	-	100123795	100140392	3337	7	0.00391	0.0213	-1.35	down	8	4	6	16	8	11	0.00126	0.00081	0.00065	0.00223	0.00294	0.00154	0.00091	0.00026	0.00224	0.00057
GXT_22751492	ENST00000284776	GXL_164638	SORBS2	8470	NC_000004	chr4	-	186506598	186877522	5996	21	1.74e-124	1.63e-121	-1.2	down	1026	837	1481	2673	980	2573	0.08324	0.08838	0.08467	0.20787	0.19025	0.20183	0.08543	0.00217	0.19998	0.00731
GXT_22751608	ENST00000296604	GXL_383385	RANBP3L	202151	NC_000005	chr5	-	36248536	36302004	3104	14	0.000388	0.00294	-1.01	down	18	12	21	36	15	30	0.00297	0.00261	0.00221	0.00527	0.00514	0.00465	0.0026	0.00031	0.00502	0.00027
GXT_22751690	ENST00000360047	GXL_159402	PDE4D	5144	NC_000005	chr5	-	58269515	58882325	3122	15	5.43e-11	1.23e-09	-1.11	down	40	29	52	90	32	91	0.00673	0.0057	0.00562	0.01296	0.0114	0.01388	0.00602	0.00051	0.01275	0.00102
GXT_22751693	ENST00000317118	GXL_159402	PDE4D	5144	NC_000005	chr5	-	58269845	58295759	2599	10	2.89e-11	6.7e-10	-1.17	down	33	23	44	79	26	80	0.00667	0.00557	0.0057	0.01355	0.01134	0.01466	0.00598	0.00049	0.01318	0.00138
GXT_22751711	ENST00000261306	GXL_159515	ADAMTS6	11174	NC_000005	chr5	-	64510469	64777704	3399	19	1.17e-25	6.73e-24	2.09	up	121	73	154	33	7	30	0.01682	0.01307	0.01394	0.00467	0.00252	0.00417	0.01461	0.0016	0.00379	0.00092
GXT_22751777	ENST00000329637	GXL_926093	SERINC5	256987	NC_000005	chr5	-	79430851	79499054	1266	12	4.48e-10	9.24e-09	1.08	up	100	82	163	65	15	58	0.03508	0.03755	0.0382	0.02124	0.01067	0.01888	0.03694	0.00134	0.01693	0.00453
GXT_22751835	ENST00000359109	GXL_383480	EPB41L4A	64097	NC_000005	chr5	-	111479534	111755010	2410	25	9.27e-05	0.000834	-1.11	down	19	7	24	36	12	36	0.00362	0.00168	0.00292	0.00638	0.00458	0.00579	0.00274	0.0008	0.00558	0.00075
GXT_22751895	ENST00000379086	GXL_103335	P4HA2	8974	NC_000005	chr5	-	131528303	131563512	2223	16	2.38e-86	1.01e-83	1.03	up	2643	2205	4048	1405	570	1510	0.54572	0.58375	0.57246	0.27065	0.27311	0.29566	0.56731	0.01595	0.27981	0.01125
GXT_22751896	ENST00000358760	GXL_103335	P4HA2	8974	NC_000005	chr5	-	131528306	131563547	2088	15	1.04e-92	5.22e-90	1.01	up	2523	2088	3807	1333	555	1432	0.55688	0.59403	0.57816	0.27537	0.28383	0.30051	0.57636	0.01522	0.28657	0.01044
GXT_22751897	ENST00000360568	GXL_103335	P4HA2	8974	NC_000005	chr5	-	131528303	131563775	2313	15	1.33e-89	6.21e-87	1.02	up	2574	2152	3913	1372	559	1477	0.51053	0.54755	0.53179	0.25386	0.25768	0.27788	0.52996	0.01517	0.26314	0.01054
GXT_22751997	ENST00000302014	GXL_103359	CD14	929	NC_000005	chr5	-	140011313	140013286	1886	2	9.32e-11	2.06e-09	-1.17	down	37	20	57	87	30	82	0.01001	0.00715	0.01092	0.02261	0.01953	0.02139	0.00936	0.00161	0.02118	0.00127
GXT_22752093	ENST00000355417	GXL_103234	CCDC69	26112	NC_000005	chr5	-	150560613	150603706	3451	9	1.27e-82	4.96e-80	-1.21	down	270	203	408	622	288	674	0.03984	0.03805	0.04065	0.08605	0.09934	0.09365	0.03951	0.00109	0.09301	0.00544
GXT_22752118	ENST00000311371	GXL_744803	SOX30	11063	NC_000005	chr5	-	157052687	157079372	2716	4	0.00378	0.0208	-1.49	down	2	2	8	16	2	9	0.00039	0.0005	0.00099	0.00292	0.0009	0.00165	0.00063	0.00026	0.00182	0.00083
GXT_22752407	ENST00000357183	GXL_190787	RAET1E	135250	NC_000006	chr6	-	150209601	150212170	958	4	0.00186	0.0114	-1.25	down	14	2	12	26	9	14	0.00744	0.00141	0.00394	0.01193	0.01153	0.00676	0.00426	0.00247	0.01007	0.00235
GXT_22753215	ENST00000373059	GXL_218371	RSPO1	284654	NC_000001	chr1	-	38076951	38100337	2402	7	8.65e-73	2.57e-70	-2.96	down	17	14	21	130	65	120	0.00371	0.00364	0.00316	0.02622	0.03169	0.02417	0.0035	0.00024	0.02736	0.00317
GXT_22753218	ENST00000401070	GXL_218371	RSPO1	284654	NC_000001	chr1	-	38076951	38100337	2534	6	5.07e-68	1.33e-65	-2.93	down	20	14	22	134	67	132	0.00414	0.00362	0.00314	0.02571	0.03137	0.02515	0.00363	0.00041	0.02741	0.00281
GXT_22753219	ENST00000401069	GXL_218371	RSPO1	284654	NC_000001	chr1	-	38077240	38100595	2692	7	2.21e-65	5.5e-63	-3.08	down	19	13	21	141	71	136	0.0037	0.003	0.00282	0.02543	0.03101	0.02442	0.00317	0.00038	0.02695	0.0029
GXT_22753220	ENST00000401068	GXL_218371	RSPO1	284654	NC_000001	chr1	-	38077484	38100288	2320	8	3.31e-72	9.73e-70	-3.11	down	18	11	19	130	65	126	0.00407	0.00291	0.00296	0.02714	0.03281	0.02619	0.00331	0.00054	0.02871	0.00292
GXT_22753250	ENST00000372852	GXL_825018	HEYL	26508	NC_000001	chr1	-	40089825	40105617	3661	5	0.000945	0.00639	-1.75	down	4	2	7	9	6	17	0.00057	0.00037	0.00059	0.00122	0.00201	0.00231	0.00051	0.0001	0.00185	0.00046
GXT_22753373	ENST00000372006	GXL_218269	PIK3R3	8503	NC_000001	chr1	-	46505812	46598466	5019	11	3.85e-31	2.87e-29	1.19	up	213	180	315	93	37	124	0.0218	0.02378	0.0219	0.00889	0.00881	0.01211	0.02249	0.00091	0.00994	0.00154
GXT_22753374	ENST00000262741	GXL_218269	PIK3R3	8503	NC_000001	chr1	-	46505812	46598314	5609	10	2.34e-29	1.62e-27	1.22	up	239	196	341	98	38	140	0.02194	0.0232	0.02124	0.0084	0.0081	0.01225	0.02213	0.00081	0.00958	0.00189
GXT_22753893	ENST00000369515	GXL_152556	TSPAN2	10100	NC_000001	chr1	-	115592977	115632121	793	7	0.000101	0.000901	1.21	up	32	16	42	17	5	8	0.01694	0.01171	0.01723	0.00688	0.00697	0.00404	0.01529	0.00254	0.00596	0.00136
GXT_22753894	ENST00000369514	GXL_152556	TSPAN2	10100	NC_000001	chr1	-	115590632	115632115	3123	7	7.56e-17	2.69e-15	1.42	up	74	43	105	28	13	20	0.01144	0.00882	0.0116	0.00373	0.00472	0.00302	0.01062	0.00127	0.00382	0.0007
GXT_22754225	ENST00000304760	GXL_152634	SHE	126669	NC_000001	chr1	-	154451957	154474589	6243	6	0.000711	0.00499	-2.77	down	1	1	2	6	6	6	8e-05	0.00011	0.00012	0.00048	0.00118	0.00048	0.0001	2e-05	0.00071	0.00033
GXT_22754265	ENST00000343256	GXL_1227395	MUC1/KRTCAP2	-2	NC_000001	chr1	-	155158599	155162658	648	7	2.01e-13	5.59e-12	-1.01	down	56	49	71	119	54	109	0.03917	0.04361	0.03563	0.08192	0.09262	0.07351	0.03947	0.00326	0.08268	0.00782
GXT_22754664	ENST00000311223	GXL_151294	GLUL	2752	NC_000001	chr1	-	182351669	182360950	3499	8	1.67e-112	1.27e-109	-1.5	down	2074	1522	3036	6129	2597	5957	0.29902	0.28184	0.30063	0.83496	0.87521	0.81422	0.29383	0.0085	0.84146	0.02532
GXT_22754677	ENST00000287713	GXL_151122	NMNAT2	23057	NC_000001	chr1	-	183217372	183387737	5663	11	1.98e-21	9.22e-20	-1.26	down	65	62	81	166	78	155	0.00602	0.00702	0.0051	0.01418	0.0167	0.01358	0.00605	0.00078	0.01482	0.00135
GXT_22754802	ENST00000367202	GXL_151196	ETNK2	55224	NC_000001	chr1	-	204100190	204121131	2434	8	1.46e-07	2.26e-06	-1.73	down	12	3	19	45	14	22	0.00237	0.00083	0.00267	0.00835	0.00705	0.0043	0.00196	0.00081	0.00657	0.00169
GXT_22754803	ENST00000367199	GXL_151196	ETNK2	55224	NC_000001	chr1	-	204100191	204121307	2486	7	4.95e-07	7.11e-06	-1.72	down	11	3	18	42	13	21	0.00211	0.00081	0.00247	0.00764	0.00641	0.00412	0.0018	0.00071	0.00606	0.00146
GXT_22754814	ENST00000272203	GXL_151158	PLEKHA6	22874	NC_000001	chr1	-	204190349	204329044	5031	23	8.36e-165	1.8e-161	-2.49	down	73	69	121	482	209	469	0.00715	0.00885	0.00799	0.04381	0.04768	0.04318	0.008	0.00069	0.04489	0.00199
GXT_22754816	ENST00000391949	GXL_825212	PIK3C2B	5287	NC_000001	chr1	-	204391770	204403586	2375	4	3.61e-07	5.29e-06	-3.16	down	0	2	4	14	11	10	0	0.00057	0.00061	0.00293	0.00569	0.00197	0.00039	0.00028	0.00353	0.00158
GXT_22754817	ENST00000367187	GXL_825212	PIK3C2B	5287	NC_000001	chr1	-	204391756	204459552	7686	34	1.48e-15	4.81e-14	-2.47	down	4	6	10	32	19	31	0.00027	0.00053	0.00047	0.002	0.00288	0.00194	0.00042	0.00011	0.00227	0.00043
GXT_22754829	ENST00000367160	GXL_151197	DSTYK	25778	NC_000001	chr1	-	205111632	205180727	6885	7	4.28e-39	4.47e-37	-1.14	down	225	172	359	533	212	569	0.01675	0.01665	0.01857	0.03782	0.03697	0.04073	0.01732	0.00088	0.03851	0.00161
GXT_22755453	ENST00000295113	GXL_241219	FRZB	2487	NC_000002	chr2	-	183698002	183731890	3162	6	1.84e-149	2.57e-146	-1.85	down	295	233	470	1099	527	1139	0.04579	0.04819	0.05165	0.16543	0.19454	0.17149	0.04854	0.00241	0.17715	0.01254
GXT_22755546	ENST00000374412	GXL_88985	MDH1B	130752	NC_000002	chr2	-	207602487	207630271	2553	12	0.00156	0.0098	-1.79	down	6	1	5	17	7	5	0.00123	0.00026	0.00071	0.00291	0.00337	0.00098	0.00073	0.0004	0.00242	0.00104
GXT_22755550	ENST00000295417	GXL_482333	FZD5	7855	NC_000002	chr2	-	208627310	208634287	6708	2	6.73e-103	4.25e-100	-1.62	down	205	124	273	568	256	605	0.01603	0.01247	0.01454	0.04184	0.04668	0.04454	0.01435	0.00146	0.04435	0.00198
GXT_22755968	ENST00000356106	GXL_45772	MYOCD	93649	NC_000017	chr17	+	12569214	12666999	3291	14	1.15e-09	2.26e-08	1.89	up	48	26	42	5	4	17	0.00749	0.00451	0.00444	0.00075	0.00149	0.00247	0.00548	0.00142	0.00157	0.0007
GXT_22755969	ENST00000343344	GXL_45772	MYOCD	93649	NC_000017	chr17	+	12569506	12666961	2817	13	1.57e-07	2.43e-06	1.73	up	39	26	38	5	4	17	0.00708	0.00527	0.00468	0.00088	0.00174	0.00289	0.00568	0.00102	0.00184	0.00082
GXT_22755970	ENST00000395982	GXL_45772	MYOCD	93649	NC_000017	chr17	+	12569214	12666999	3162	13	1.13e-09	2.23e-08	1.87	up	48	26	40	5	4	17	0.0078	0.00469	0.0044	0.00078	0.00155	0.00257	0.00563	0.00154	0.00163	0.00073
GXT_22756216	ENST00000251312	GXL_102571	DHRS11	79154	NC_000017	chr17	+	34948329	34957235	1497	7	3.38e-05	0.000341	1.05	up	44	29	58	21	9	19	0.01437	0.01171	0.01255	0.00662	0.00608	0.00599	0.01288	0.00111	0.00623	0.00028
GXT_22756432	ENST00000237500	GXL_70893	MYL12B	103910	NC_000018	chr18	+	3261907	3278282	1210	4	2.59e-76	8.68e-74	1.06	up	8033	5428	10481	3633	1541	3881	3.38668	2.93507	3.05099	1.44764	1.51793	1.54814	3.12425	0.19151	1.50457	0.0421
GXT_22756433	ENST00000400177	GXL_70893	MYL12B	103910	NC_000018	chr18	+	3262415	3278282	1249	4	2.44e-69	6.68e-67	1.06	up	7245	4922	9541	3291	1413	3536	2.99662	2.61434	2.72293	1.28641	1.36654	1.38552	2.77796	0.16084	1.34616	0.04295
GXT_22756435	ENST00000400174	GXL_70893	MYL12B	103910	NC_000018	chr18	+	3262954	3278282	1064	4	1.7e-69	4.7e-67	1.06	up	7237	4915	9526	3287	1411	3529	3.51342	3.0647	3.19128	1.50822	1.60184	1.62373	3.25647	0.1889	1.57793	0.0501
GXT_22756476	ENST00000383376	GXL_47213	IMPA2	3613	NC_000018	chr18	+	11981455	12008359	472	3	2.49e-19	1.01e-17	-1.14	down	82	75	111	190	87	197	0.08555	0.09383	0.08039	0.19223	0.21465	0.1968	0.08659	0.00554	0.20123	0.00967
GXT_22756543	ENST00000217740	GXL_481039	RNF125	54941	NC_000018	chr18	+	29598335	29653176	6020	6	0.0105	0.0483	-2	down	2	1	1	5	2	7	0.00017	0.00011	6e-05	0.00041	0.00041	0.00058	0.00011	4e-05	0.00047	8e-05
GXT_22756633	ENST00000382790	GXL_925248	TNFRSF11A	8792	NC_000018	chr18	+	59992520	60053502	2201	7	0.00426	0.0229	1.63	up	9	8	23	5	0	7	0.00191	0.0023	0.00378	0.00112	0	0.00136	0.00266	0.00081	0.00083	0.00059
GXT_22756634	ENST00000269485	GXL_925248	TNFRSF11A	8792	NC_000018	chr18	+	59992548	60054899	4521	10	0.000101	0.000899	1.61	up	21	17	42	11	0	14	0.00232	0.00239	0.00336	0.0012	0	0.00143	0.00269	0.00047	0.00088	0.00063
GXT_22757369	ENST00000215069	GXL_262149	CATSPERG	57828	NC_000019	chr19	+	38826783	38861589	3504	26	0.00717	0.0354	-1.78	down	2	2	6	7	6	10	0.0003	0.00038	0.00062	0.00099	0.0021	0.00114	0.00043	0.00014	0.00141	0.00049
GXT_22757514	ENST00000253426	GXL_262253	ZNF233	353355	NC_000019	chr19	+	44770349	44779468	2642	3	0.00362	0.02	-1.72	down	4	2	3	9	5	9	0.00079	0.00051	0.00041	0.0015	0.00232	0.0017	0.00057	0.00016	0.00184	0.00035
GXT_22757570	ENST00000300862	GXL_382179	HIF3A	64344	NC_000019	chr19	+	46806856	46843357	2551	15	2.51e-09	4.76e-08	-3.87	down	1	1	2	12	13	13	0.00021	0.00026	0.00028	0.00194	0.00578	0.00234	0.00025	3e-05	0.00335	0.00172
GXT_22757583	ENST00000257267	GXL_262160	GPR77	27202	NC_000019	chr19	+	47844040	47845272	1233	1	1.16e-107	7.87e-105	-1.61	down	182	147	230	580	222	594	0.07693	0.08015	0.06693	0.23005	0.21872	0.23822	0.07467	0.00563	0.229	0.008
GXT_22758082	ENST00000378637	GXL_128243	PLCB1	23236	NC_000020	chr20	+	8113296	8783130	3854	32	1.27e-15	4.14e-14	-1.49	down	41	20	56	101	45	101	0.00481	0.00312	0.00431	0.01106	0.01226	0.0112	0.00408	0.00071	0.01151	0.00054
GXT_22758084	ENST00000378641	GXL_128243	PLCB1	23236	NC_000020	chr20	+	8112824	8865547	7295	33	1.11e-42	1.33e-40	-1.85	down	64	29	79	175	93	193	0.0042	0.00248	0.00342	0.01087	0.01447	0.01215	0.00337	0.0007	0.0125	0.00149
GXT_22758445	ENST00000372861	GXL_132740	KCNK15	60598	NC_000020	chr20	+	43374421	43379675	1320	2	2.11e-16	7.27e-15	-2.51	down	5	7	5	34	17	31	0.00199	0.00358	0.00137	0.01278	0.01488	0.01171	0.00231	0.00093	0.01312	0.00132
GXT_22758561	ENST00000262593	GXL_779452	DOK5	55816	NC_000020	chr20	+	53092136	53267710	1963	8	6.07e-29	4.1e-27	1.18	up	297	219	436	123	59	144	0.07348	0.07042	0.07583	0.02905	0.03537	0.03451	0.07324	0.00221	0.03298	0.0028
GXT_22758676	ENST00000370512	GXL_81789	SLCO4A1	28231	NC_000020	chr20	+	61273797	61303647	2778	14	2.94e-07	4.36e-06	-3.49	down	0	1	2	19	2	8	0	0.00024	0.00026	0.00303	0.00088	0.00126	0.00017	0.00012	0.00172	0.00094
GXT_22758678	ENST00000342674	GXL_81789	SLCO4A1	28231	NC_000020	chr20	+	61287807	61303363	1752	9	2.36e-05	0.000247	-4.79	down	0	0	1	11	2	4	0	0	0.00021	0.00311	0.0014	0.00114	7e-05	0.0001	0.00188	0.00087
GXT_22758871	ENST00000381151	GXL_1228783	SLC5A3/MRPS6	-2	NC_000021	chr21	+	35467161	35478559	11399	1	1.52e-53	2.61e-51	-1	down	415	322	714	931	365	981	0.01902	0.01895	0.02253	0.04047	0.03908	0.04283	0.02017	0.00167	0.04079	0.00155
GXT_22758878	ENST00000360731	GXL_163482	CLIC6	54102	NC_000021	chr21	+	36041688	36090525	3860	7	2.55e-05	0.000264	-1.58	down	6	7	6	14	9	25	0.00068	0.00122	0.00056	0.0018	0.00286	0.0031	0.00082	0.00029	0.00259	0.00056
GXT_22758907	ENST00000398932	GXL_176086	KCNJ15	3772	NC_000021	chr21	+	39644172	39673412	2747	4	2.28e-11	5.34e-10	1.34	up	71	66	117	34	12	36	0.01356	0.01621	0.01539	0.00614	0.00536	0.00636	0.01505	0.00111	0.00595	0.00043
GXT_22758908	ENST00000398930	GXL_176086	KCNJ15	3772	NC_000021	chr21	+	39644345	39673743	2914	4	8.39e-15	2.58e-13	1.33	up	76	71	126	36	12	42	0.01368	0.01643	0.01562	0.00613	0.00506	0.00691	0.01524	0.00115	0.00603	0.00076
GXT_22758962	ENST00000352133	GXL_925621	SLC37A1	54020	NC_000021	chr21	+	43934024	44001550	3664	20	0.000288	0.00227	-1.09	down	12	10	19	32	11	27	0.00143	0.00147	0.00164	0.004	0.00335	0.0034	0.00151	9e-05	0.00358	0.0003
GXT_22759109	ENST00000330488	GXL_382759	GP1BB	2812	NC_000022	chr22	+	19705897	19710241	1487	11	1.16e-13	3.27e-12	-1.01	down	96	58	105	164	78	164	0.02786	0.02322	0.02295	0.04723	0.05626	0.04862	0.02468	0.00225	0.0507	0.00397
GXT_22759112	ENST00000366425	GXL_382759	GP1BB	2812	NC_000022	chr22	+	19710468	19712294	1553	2	3.51e-09	6.55e-08	-1.2	down	28	25	39	62	32	73	0.00946	0.01081	0.0088	0.01973	0.02523	0.02335	0.00969	0.00084	0.02277	0.00228
GXT_22759254	ENST00000324198	GXL_664276	ADRBK2	157	NC_000022	chr22	+	25960816	26118601	2443	21	4.73e-07	6.81e-06	1.68	up	24	23	37	5	5	9	0.00472	0.0058	0.00429	0.00101	0.00251	0.00143	0.00494	0.00064	0.00165	0.00063
GXT_22759386	ENST00000357436	GXL_47696	SH3BP1/PDXP	-2	NC_000022	chr22	+	38035482	38052124	2851	18	0.00202	0.0122	1.03	up	28	21	38	15	5	15	0.00515	0.00426	0.00456	0.00261	0.002	0.00245	0.00466	0.00037	0.00235	0.00026
GXT_22759589	ENST00000395737	GXL_47730	ADM2	79924	NC_000022	chr22	+	50920153	50921369	535	3	0.00115	0.00755	3.02	up	9	7	7	1	0	2	0.00784	0.00882	0.00473	0.00093	0	0.00186	0.00713	0.00174	0.00093	0.00076
GXT_22760033	ENST00000321382	GXL_59687	FAM113B	91523	NC_000012	chr12	+	47473386	47630439	2324	4	1.42e-22	7.02e-21	1.24	up	121	98	173	59	25	45	0.02691	0.0275	0.02608	0.01259	0.01321	0.00964	0.02683	0.00058	0.01181	0.00156
GXT_22760347	ENST00000261180	GXL_141529	TRHDE	29953	NC_000012	chr12	+	72666463	73059421	5617	19	1.33e-07	2.07e-06	1.59	up	34	17	41	7	6	8	0.00289	0.00204	0.00244	0.00062	0.00131	0.00071	0.00246	0.00035	0.00088	0.00031
GXT_22760448	ENST00000397736	GXL_103586	TXNRD1	7296	NC_000012	chr12	+	104684787	104744055	3489	14	8.26e-79	2.98e-76	-1.02	down	3247	2410	4800	6898	2768	7113	0.46021	0.44128	0.46975	0.92906	0.92612	0.95862	0.45708	0.01183	0.93793	0.01468
GXT_22760512	ENST00000381468	GXL_40655	WASF3	10810	NC_000013	chr13	+	27131840	27263080	4834	10	1.11e-61	2.49e-59	-1.19	down	923	696	1444	2288	954	2199	0.0973	0.09436	0.10453	0.22803	0.23482	0.22082	0.09873	0.00427	0.22789	0.00572
GXT_22760514	ENST00000361042	GXL_40655	WASF3	10810	NC_000013	chr13	+	27131840	27263080	4823	10	3.67e-142	4.52e-139	-1.2	down	950	717	1459	2344	978	2272	0.10025	0.09749	0.10579	0.23382	0.24095	0.2279	0.10118	0.00345	0.23422	0.00534
GXT_22760550	ENST00000267067	GXL_40604	FRY	10129	NC_000013	chr13	+	32659981	32870776	10005	59	3.69e-49	5.66e-47	-1.12	down	178	141	267	422	177	400	0.00891	0.00883	0.00885	0.01928	0.019	0.01859	0.00886	3e-05	0.01896	0.00028
GXT_22760551	ENST00000380218	GXL_40604	FRY	10129	NC_000013	chr13	+	32823676	32852976	1698	10	2.03e-09	3.88e-08	-1.22	down	30	26	58	84	43	67	0.00896	0.00913	0.01064	0.02179	0.02965	0.0176	0.00958	0.00076	0.02301	0.00499
GXT_22760584	ENST00000379359	GXL_664132	C13orf15	28984	NC_000013	chr13	+	42031695	42045018	960	5	1.01e-159	1.92e-156	-2	down	240	195	432	1173	427	1139	0.12568	0.12783	0.14777	0.56524	0.51926	0.54333	0.13376	0.00995	0.54261	0.01878
GXT_22760648	ENST00000298125	GXL_40647	WDFY2	115825	NC_000013	chr13	+	52158644	52334135	1613	12	1.4e-28	9.23e-27	1.16	up	236	208	353	131	36	137	0.06584	0.07635	0.06886	0.03485	0.02396	0.03724	0.07035	0.00442	0.03202	0.00578
GXT_22760860	ENST00000304704	GXL_247869	ANG/RNASE4	-2	NC_000014	chr14	+	21152818	21168710	1401	3	2.04e-41	2.35e-39	-1.22	down	235	163	280	548	212	505	0.085	0.077	0.07118	0.18958	0.18019	0.1751	0.07773	0.00567	0.18162	0.006
GXT_22760862	ENST00000397995	GXL_247869	ANG/RNASE4	-2	NC_000014	chr14	+	21152742	21168236	837	2	2.45e-27	1.53e-25	-1.11	down	175	112	202	350	142	355	0.10739	0.08969	0.08661	0.20407	0.20412	0.20908	0.09456	0.00916	0.20576	0.00235
GXT_22760864	ENST00000336811	GXL_247869	ANG/RNASE4	-2	NC_000014	chr14	+	21152689	21162222	746	2	2.97e-38	3.01e-36	-1.29	down	85	62	95	214	73	206	0.05672	0.05392	0.04473	0.1377	0.11431	0.13197	0.05179	0.00512	0.12799	0.00995
GXT_22760866	ENST00000397987	GXL_247869	ANG/RNASE4	-2	NC_000014	chr14	+	21156940	21162233	603	2	3.99e-16	1.35e-14	-1.28	down	33	32	40	111	31	75	0.0281	0.03474	0.02367	0.08938	0.0609	0.05958	0.02884	0.00455	0.06995	0.01375
GXT_22761020	ENST00000382493	GXL_1224781	COCH	1690	NC_000014	chr14	+	31343741	31359822	2692	12	0.00604	0.0307	-2.79	down	1	0	2	2	3	8	0.00019	0	0.00027	0.00037	0.00137	0.0014	0.00015	0.00011	0.00105	0.00048
GXT_22761047	ENST00000327441	GXL_247904	MIPOL1	145282	NC_000014	chr14	+	37667155	38021566	7185	14	5.2e-06	6.27e-05	-1.04	down	28	15	36	51	20	57	0.00183	0.00141	0.00176	0.00324	0.0029	0.00367	0.00167	0.00018	0.00327	0.00032
GXT_22761172	ENST00000357395	GXL_247711	SYNE2	23224	NC_000014	chr14	+	64319683	64693165	21878	116	1.05e-71	3.03e-69	-1.69	down	73	79	137	299	118	338	0.00161	0.00225	0.00206	0.0063	0.0064	0.00707	0.00197	0.00027	0.00659	0.00034
GXT_22761176	ENST00000394768	GXL_247711	SYNE2	23224	NC_000014	chr14	+	64542333	64693151	11098	63	1.9e-90	9.1e-88	-1.78	down	56	62	108	244	101	276	0.00246	0.0034	0.00316	0.01001	0.01073	0.0113	0.00301	0.0004	0.01068	0.00053
GXT_22761182	ENST00000394709	GXL_247803	HSPA2	3306	NC_000014	chr14	+	65002623	65009955	2464	2	3.45e-39	3.62e-37	-1.11	down	245	193	324	541	230	543	0.05216	0.0528	0.0475	0.10886	0.11456	0.10966	0.05082	0.00236	0.11103	0.00252
GXT_22761183	ENST00000247207	GXL_247803	HSPA2	3306	NC_000014	chr14	+	65007460	65009950	2491	1	8.46e-38	8.38e-36	-1.13	down	251	201	332	569	237	566	0.05285	0.0544	0.04815	0.11325	0.11677	0.11307	0.0518	0.00266	0.11436	0.0017
GXT_22761186	ENST00000394691	GXL_247786	PLEKHG3	26030	NC_000014	chr14	+	65171315	65211010	4395	17	6.2e-18	2.35e-16	-1.47	down	29	19	28	67	29	76	0.00346	0.00267	0.00222	0.00733	0.00754	0.00801	0.00278	0.00051	0.00763	0.00028
GXT_22761615	ENST00000397434	GXL_4893	CHAC1	79094	NC_000015	chr15	+	41245680	41247972	636	4	7.9e-26	4.59e-24	1.51	up	97	97	137	26	23	36	0.07917	0.0986	0.07669	0.02027	0.03668	0.02821	0.08482	0.0098	0.02839	0.0067
GXT_22761721	ENST00000267843	GXL_5109	FGF7	2252	NC_000015	chr15	+	49715375	49780972	5385	4	2.96e-70	8.36e-68	-1.13	down	3477	2407	4989	7768	3097	7837	0.33321	0.29744	0.33053	0.70476	0.69685	0.7149	0.32039	0.01627	0.7055	0.00739
GXT_22761729	ENST00000335449	GXL_4856	GLDN	342035	NC_000015	chr15	+	51633877	51700210	4920	10	5.47e-08	8.91e-07	-2.34	down	4	2	7	22	7	22	0.00043	0.00027	0.00051	0.00222	0.0015	0.00223	0.0004	0.0001	0.00198	0.00034
GXT_22761948	ENST00000220244	GXL_230294	KIAA1199	57214	NC_000015	chr15	+	81071684	81244117	7226	29	1.06e-52	1.8e-50	1.23	up	97955	84252	157795	46881	18810	50070	6.66388	7.37532	7.38891	3.0205	3.00306	3.23422	7.1427	0.33862	3.08593	0.1051
GXT_22761949	ENST00000394685	GXL_230294	KIAA1199	57214	NC_000015	chr15	+	81071712	81244117	7357	30	1.15e-52	1.95e-50	1.23	up	98001	84287	157862	46897	18817	50093	6.54785	7.24668	7.26029	2.96762	2.95066	3.17805	7.01827	0.33269	3.03211	0.10343
GXT_22761950	ENST00000356249	GXL_230294	KIAA1199	57214	NC_000015	chr15	+	81071712	81244117	7297	30	1.13e-52	1.93e-50	1.23	up	97998	84280	157849	46896	18817	50089	6.60147	7.30562	7.31935	2.99196	2.97492	3.20391	7.07548	0.33522	3.05693	0.10416
GXT_22761951	ENST00000394683	GXL_230294	KIAA1199	57214	NC_000015	chr15	+	81071712	81241188	3242	23	2.89e-91	1.4e-88	1.27	up	38909	33552	62521	18539	7099	19340	5.59642	6.21744	6.18567	2.52215	2.3957	2.63128	5.99984	0.28556	2.51638	0.09626
GXT_22761959	ENST00000394660	GXL_230287	IL16	3603	NC_000015	chr15	+	81489220	81606399	9616	19	6.41e-19	2.56e-17	-1.03	down	93	70	134	191	77	218	0.00507	0.00466	0.00492	0.00946	0.00956	0.01117	0.00488	0.00017	0.01006	0.00078
GXT_22761961	ENST00000302987	GXL_230287	IL16	3603	NC_000015	chr15	+	81517741	81601139	3999	18	7.1e-15	2.2e-13	-1.16	down	49	32	59	95	41	116	0.00643	0.00479	0.00506	0.01091	0.01228	0.0142	0.00543	0.00072	0.01246	0.00135
GXT_22761962	ENST00000394653	GXL_230287	IL16	3603	NC_000015	chr15	+	81587467	81605102	6165	8	2.06e-14	6.14e-13	-1.07	down	49	40	68	103	40	128	0.00417	0.00424	0.00387	0.00828	0.00797	0.0103	0.00409	0.00016	0.00885	0.00103
GXT_22762091	ENST00000293861	GXL_167528	SNRNP25	79622	NC_000016	chr16	+	103010	107669	1905	5	1.19e-27	7.56e-26	-1.06	down	145	98	206	296	136	284	0.03663	0.0304	0.03435	0.06982	0.07772	0.0672	0.03379	0.00257	0.07158	0.00447
GXT_22762149	ENST00000382862	GXL_167479	MSLN	10232	NC_000016	chr16	+	812594	818865	2112	16	2.55e-06	3.26e-05	-1.39	down	19	6	21	34	16	41	0.00358	0.00192	0.00291	0.00728	0.00872	0.00778	0.0028	0.00068	0.00793	0.0006
GXT_22762262	ENST00000382213	GXL_316701	IL32	9235	NC_000016	chr16	+	3115313	3119668	1066	6	0.000194	0.0016	3.13	up	13	4	10	2	0	1	0.00465	0.00253	0.00305	0.00093	0	0.00047	0.00341	0.0009	0.00047	0.00038
GXT_22762263	ENST00000396887	GXL_316701	IL32	9235	NC_000016	chr16	+	3115323	3119376	617	8	0.00166	0.0104	3.88	up	10	0	6	1	0	0	0.00462	0	0.00293	0.0008	0	0	0.00252	0.00191	0.00027	0.00038
GXT_22762264	ENST00000382210	GXL_316701	IL32	9235	NC_000016	chr16	+	3115313	3119356	610	8	0.00101	0.00676	3.97	up	11	0	6	1	0	0	0.00553	0	0.00296	0.00081	0	0	0.00283	0.00226	0.00027	0.00038
GXT_22762371	ENST00000304381	GXL_167453	TMC7	79905	NC_000016	chr16	+	18995274	19074503	3622	16	1.59e-25	9.1e-24	1.57	up	94	79	156	36	10	48	0.01266	0.01359	0.01457	0.00452	0.00339	0.00619	0.01361	0.00078	0.0047	0.00115
GXT_22762621	ENST00000268459	GXL_98563	NKD1	85407	NC_000016	chr16	+	50582241	50670647	4592	10	0.0021	0.0126	-2.23	down	0	2	1	11	1	3	0	0.00015	8e-05	0.00119	0.00027	0.00033	8e-05	6e-05	0.0006	0.00042
GXT_22762695	ENST00000219271	GXL_98654	MMP15	4324	NC_000016	chr16	+	58059470	58080805	4250	10	3.25e-22	1.58e-20	-1.28	down	60	42	89	156	72	120	0.00716	0.00666	0.00731	0.01785	0.02004	0.01383	0.00704	0.00028	0.01724	0.00257
GXT_22762786	ENST00000264012	GXL_89940	CDH3	1001	NC_000016	chr16	+	68678739	68732971	3702	16	5.53e-05	0.000529	-1.43	down	5	10	7	20	10	21	0.00071	0.00146	0.00068	0.00254	0.00298	0.00283	0.00095	0.00036	0.00278	0.00018
GXT_22762893	ENST00000219454	GXL_89821	WFDC1	58189	NC_000016	chr16	+	84328252	84363457	1534	7	6.14e-56	1.14e-53	-2.33	down	28	25	60	168	59	228	0.00877	0.01055	0.01272	0.05	0.04562	0.06721	0.01068	0.00162	0.05428	0.00932
GXT_22763461	ENST00000324631	GXL_90449	CACNB2	783	NC_000010	chr10	+	18429606	18830056	3446	14	7.08e-05	0.000658	-1.98	down	8	1	4	17	9	11	0.00122	0.0002	0.00042	0.0023	0.00249	0.00158	0.00061	0.00044	0.00212	0.00039
GXT_22763464	ENST00000282343	GXL_90449	CACNB2	783	NC_000010	chr10	+	18429887	18830056	3524	14	7.08e-05	0.000658	-1.98	down	8	1	4	17	9	11	0.00119	0.00019	0.00041	0.00225	0.00244	0.00155	0.0006	0.00043	0.00208	0.00038
GXT_22763465	ENST00000377331	GXL_90449	CACNB2	783	NC_000010	chr10	+	18430109	18828653	1827	14	0.00163	0.0102	-1.98	down	6	1	1	12	7	4	0.00172	0.00037	0.0002	0.00299	0.00336	0.00109	0.00076	0.00068	0.00248	0.00099
GXT_22763469	ENST00000377315	GXL_90449	CACNB2	783	NC_000010	chr10	+	18689742	18830056	3461	13	7.08e-05	0.000658	-1.98	down	8	1	4	17	9	11	0.00121	0.00019	0.00042	0.00229	0.00248	0.00158	0.00061	0.00044	0.00212	0.00039
GXT_22763546	ENST00000375322	GXL_90538	MAP3K8	1326	NC_000010	chr10	+	30723173	30728371	893	3	0.00135	0.00865	-1.02	down	12	9	24	24	12	33	0.00705	0.00604	0.00931	0.01253	0.01644	0.01785	0.00747	0.00137	0.01561	0.00225
GXT_22763903	ENST00000372013	GXL_691335	C10orf116/AGAP11	-2	NC_000010	chr10	+	88727949	88730672	917	3	1.04e-88	4.69e-86	-1.51	down	244	155	336	644	309	635	0.13099	0.10665	0.12129	0.32108	0.38681	0.32237	0.11964	0.01	0.34342	0.03069
GXT_22764078	ENST00000370201	GXL_134228	SFXN3	81855	NC_000010	chr10	+	102792162	102800998	2703	11	7.52e-76	2.51e-73	-1.32	down	680	498	959	1710	758	1690	0.12402	0.11762	0.12092	0.29263	0.33071	0.2938	0.12085	0.00261	0.30571	0.01768
GXT_22764079	ENST00000313664	GXL_134185	KAZALD1	81621	NC_000010	chr10	+	102820999	102827810	1685	4	7.18e-50	1.13e-47	-1.1	down	173	146	267	398	185	394	0.05261	0.05642	0.05554	0.11421	0.13042	0.11291	0.05486	0.00163	0.11918	0.00797
GXT_22764243	ENST00000369073	GXL_134226	PPAPDC1A	196051	NC_000010	chr10	+	122263091	122349363	1135	7	1.51e-42	1.8e-40	1.9	up	162	131	222	51	12	57	0.06728	0.07518	0.06643	0.02076	0.0119	0.02355	0.06963	0.00394	0.01874	0.00497
GXT_22764378	ENST00000399817	GXL_123377	IFITM2	10581	NC_000011	chr11	+	308163	309395	659	2	3.98e-84	1.6e-81	-1.09	down	1499	1164	2026	3307	1387	3239	1.18958	1.18954	1.10625	2.472	2.57946	2.43523	1.16179	0.03927	2.49556	0.06119
GXT_22764455	ENST00000381363	GXL_123380	IGF2AS	51214	NC_000011	chr11	+	2161874	2169037	1867	2	0.00051	0.00373	-1.4	down	12	4	10	17	12	21	0.00337	0.00144	0.00194	0.00409	0.0072	0.00507	0.00225	0.00082	0.00545	0.0013
GXT_22764512	ENST00000380107	GXL_123167	TRIM34	53840	NC_000011	chr11	+	5617359	5633653	2592	9	3.24e-08	5.41e-07	1.4	up	63	40	83	36	4	23	0.01254	0.01015	0.0115	0.0067	0.00189	0.00442	0.0114	0.00098	0.00434	0.00196
GXT_22764603	ENST00000310358	GXL_123201	SPON1	10418	NC_000011	chr11	+	13984452	14287233	2423	16	1.73e-30	1.26e-28	-1.66	down	26	20	46	97	38	90	0.00541	0.00557	0.00626	0.01779	0.01824	0.01686	0.00575	0.00037	0.01763	0.00057
GXT_22764621	ENST00000356524	GXL_123163	SAA1	6288	NC_000011	chr11	+	18287721	18291507	601	4	3.24e-156	5.7e-153	-1.77	down	315	240	462	1058	520	1076	0.27446	0.26811	0.27687	0.86771	1.04904	0.88401	0.27315	0.00369	0.93359	0.08191
GXT_22764696	ENST00000315571	GXL_170832	LDLRAD3	143458	NC_000011	chr11	+	35965628	36253686	3798	6	1.83e-53	3.15e-51	-1.18	down	153	128	244	366	170	384	0.02063	0.02237	0.02292	0.04701	0.05429	0.04969	0.02197	0.00098	0.05033	0.00301
GXT_22764861	ENST00000227451	GXL_664109	DTX4	23220	NC_000011	chr11	+	58939965	58976060	5642	9	2.22e-16	7.63e-15	-1.45	down	26	30	41	95	37	85	0.00242	0.00323	0.00263	0.00812	0.00783	0.0072	0.00276	0.00034	0.00772	0.00038
GXT_22765337	ENST00000327419	GXL_924892	C11orf87	399947	NC_000011	chr11	+	109292846	109299840	5884	2	3.31e-251	2.13e-247	1.7	up	1486	1138	2256	488	185	529	0.13223	0.12993	0.13838	0.04103	0.03858	0.04478	0.13351	0.00357	0.04146	0.00255
GXT_22765368	ENST00000316851	GXL_479736	NCAM1	4684	NC_000011	chr11	+	113067915	113149133	5621	19	2.21e-05	0.000233	-1.26	down	14	10	24	38	16	33	0.00121	0.00108	0.00142	0.00318	0.00328	0.00284	0.00124	0.00014	0.0031	0.00019
GXT_22765369	ENST00000397963	GXL_479736	NCAM1	4684	NC_000011	chr11	+	113067915	113149133	5591	18	2.21e-05	0.000233	-1.26	down	14	10	24	38	16	33	0.00122	0.00109	0.00142	0.00319	0.00329	0.00285	0.00124	0.00014	0.00311	0.00019
GXT_22765380	ENST00000335953	GXL_174014	ZBTB16	7704	NC_000011	chr11	+	113930315	114121352	2477	7	6.77e-78	2.4e-75	-2.22	down	63	48	97	302	129	327	0.0125	0.01263	0.01313	0.05884	0.06146	0.06253	0.01275	0.00027	0.06094	0.00155
GXT_22765382	ENST00000310883	GXL_174014	ZBTB16	7704	NC_000011	chr11	+	113934023	114121352	1729	7	9.87e-117	8.02e-114	-2.11	down	40	40	78	209	90	236	0.01092	0.01498	0.01484	0.05791	0.06036	0.06366	0.01358	0.00188	0.06064	0.00236
GXT_22765632	ENST00000361629	GXL_103602	OAS1	4938	NC_000012	chr12	+	113344739	113357536	1487	6	5.21e-09	9.54e-08	-1.43	down	15	19	37	64	35	37	0.00529	0.00862	0.00826	0.02067	0.02723	0.0114	0.00739	0.00149	0.01977	0.00649
GXT_22765634	ENST00000377508	GXL_103602	OAS1	4938	NC_000012	chr12	+	113344845	113369794	1150	6	9.88e-05	0.000883	-1.2	down	15	14	32	47	26	24	0.00684	0.00821	0.00929	0.0194	0.0256	0.00937	0.00811	0.001	0.01812	0.00669
GXT_22765681	ENST00000261826	GXL_103715	P2RX7	5027	NC_000012	chr12	+	121570678	121623856	3135	13	0.000536	0.0039	-2.1	down	3	3	4	8	11	9	0.0005	0.00065	0.00046	0.00117	0.00392	0.00123	0.00054	8e-05	0.00211	0.00128
GXT_22765683	ENST00000328963	GXL_103715	P2RX7	5027	NC_000012	chr12	+	121570678	121623856	3038	12	0.000366	0.0028	-2.31	down	3	2	4	8	11	9	0.00052	0.00044	0.00048	0.00121	0.00404	0.00127	0.00048	3e-05	0.00217	0.00132
GXT_22765734	ENST00000338359	GXL_1224090	FAM101A	144347	NC_000012	chr12	+	124773710	124799287	614	5	1.79e-11	4.25e-10	1.37	up	72	42	80	32	12	13	0.05445	0.03804	0.04088	0.01958	0.0209	0.01055	0.04446	0.00716	0.01701	0.0046
GXT_22765873	ENST00000251630	GXL_42491	PDGFRL	5157	NC_000008	chr8	+	17433942	17500616	1875	7	6.75e-12	1.65e-10	-1.36	down	23	20	35	62	23	81	0.00627	0.00719	0.00655	0.01518	0.01506	0.02099	0.00667	0.00039	0.01708	0.00277
GXT_22765874	ENST00000398074	GXL_42491	PDGFRL	5157	NC_000008	chr8	+	17434733	17501375	2222	6	8.84e-12	2.15e-10	-1.38	down	23	19	36	62	23	82	0.00529	0.00577	0.00569	0.01281	0.01271	0.01793	0.00558	0.00021	0.01448	0.00244
GXT_22765894	ENST00000381455	GXL_42295	EPB49	2039	NC_000008	chr8	+	21915376	21939877	2081	16	0.00204	0.0123	-1.06	down	9	5	6	18	3	18	0.00202	0.00162	0.00087	0.00405	0.00177	0.00407	0.0015	0.00048	0.0033	0.00108
GXT_22766130	ENST00000377959	GXL_15227	GLIPR2	152007	NC_000009	chr9	+	36136739	36162907	812	4	1.5e-41	1.74e-39	1.07	up	454	322	607	198	102	201	0.27384	0.25472	0.25177	0.11577	0.14718	0.11774	0.26011	0.00978	0.1269	0.01437
GXT_22766234	ENST00000377218	GXL_15310	FAM189A2	9413	NC_000009	chr9	+	71944241	72007370	2130	10	0.000694	0.00489	-1.27	down	10	3	21	24	9	26	0.00209	0.00095	0.00321	0.00442	0.00519	0.00561	0.00208	0.00092	0.00507	0.00049
GXT_22766235	ENST00000377225	GXL_15310	FAM189A2	9413	NC_000009	chr9	+	71986414	72007370	1992	9	0.00101	0.00675	-1.1	down	15	4	23	29	10	28	0.00356	0.00135	0.00363	0.00597	0.00616	0.0065	0.00285	0.00106	0.00621	0.00022
GXT_22766609	ENST00000373580	GXL_184892	OLFML2A	169611	NC_000009	chr9	+	127539550	127577157	6425	8	1.08e-87	4.74e-85	-1.5	down	607	499	920	1814	852	1775	0.04907	0.0511	0.0508	0.1378	0.15904	0.13604	0.05032	0.00089	0.14429	0.01045
GXT_22766612	ENST00000288815	GXL_184892	OLFML2A	169611	NC_000009	chr9	+	127563153	127577164	5964	5	7.64e-101	4.5e-98	-1.5	down	555	442	842	1646	759	1625	0.04867	0.04939	0.05028	0.13577	0.15464	0.13512	0.04945	0.00066	0.14184	0.00905
GXT_22766644	ENST00000373446	GXL_695653	RALGPS1	9649	NC_000009	chr9	+	129677112	129979663	2218	18	0.00551	0.0285	-1.05	down	10	4	13	19	6	19	0.00213	0.00091	0.00179	0.0038	0.00332	0.00382	0.00161	0.00051	0.00365	0.00023
GXT_22766650	ENST00000373434	GXL_695653	RALGPS1	9649	NC_000009	chr9	+	129724504	129980091	2466	17	0.00409	0.0222	-1.04	down	10	5	12	19	6	20	0.00191	0.00109	0.00147	0.00342	0.00299	0.00364	0.00149	0.00034	0.00335	0.00027
GXT_22766777	ENST00000372393	GXL_185059	ASS1	445	NC_000009	chr9	+	133325660	133376661	1558	15	1.3e-204	4.91e-201	-1.62	down	315	213	365	912	400	851	0.08934	0.07991	0.0738	0.25184	0.28147	0.23625	0.08102	0.00639	0.25652	0.01876
GXT_22766779	ENST00000372386	GXL_185059	ASS1	445	NC_000009	chr9	+	133355243	133376565	667	6	9.13e-58	1.82e-55	-1.68	down	130	96	148	401	171	389	0.09461	0.08974	0.07328	0.2759	0.2938	0.26395	0.08588	0.00913	0.27788	0.01227
GXT_22766800	ENST00000372300	GXL_184925	AIF1L	83543	NC_000009	chr9	+	133971938	133998532	3284	6	0.0105	0.0483	-2	down	2	1	1	6	2	6	0.00032	0.00021	0.00011	0.00072	0.00052	0.00063	0.00021	9e-05	0.00062	8e-05
GXT_22767701	ENST00000324771	GXL_926176	DDR1	780	NC_000006	chr6	+	30848626	30867931	4148	20	1.59e-77	5.54e-75	-1.2	down	702	523	967	1641	693	1633	0.08329	0.07973	0.08001	0.18306	0.19073	0.1828	0.08101	0.00162	0.18553	0.00368
GXT_22767702	ENST00000396342	GXL_926176	DDR1	780	NC_000006	chr6	+	30850753	30858775	675	5	1.19e-40	1.33e-38	-1.33	down	69	50	101	189	65	195	0.04965	0.0479	0.05086	0.13262	0.11099	0.13704	0.04947	0.00122	0.12688	0.01138
GXT_22768121	ENST00000355073	GXL_261223	SLC25A27	9481	NC_000006	chr6	+	46620679	46649308	1196	9	4.11e-06	5.05e-05	-1.47	down	20	5	15	43	18	20	0.00658	0.00282	0.00393	0.0157	0.01647	0.00791	0.00444	0.00158	0.01336	0.00387
GXT_22768452	ENST00000297469	GXL_35190	GPER	2852	NC_000007	chr7	+	1126512	1133451	2778	2	5.73e-10	1.17e-08	-1.04	down	45	37	64	89	48	93	0.00831	0.00898	0.00832	0.0158	0.02121	0.01666	0.00854	0.00031	0.01789	0.00237
GXT_22768454	ENST00000354575	GXL_35190	GPER	2852	NC_000007	chr7	+	1131365	1132873	1228	2	2e-06	2.61e-05	-1.22	down	24	17	22	45	27	40	0.01025	0.00933	0.00647	0.01798	0.02699	0.01622	0.00868	0.00161	0.0204	0.00472
GXT_22768476	ENST00000338732	GXL_35115	LFNG	3955	NC_000007	chr7	+	2558188	2568061	1968	8	2.51e-19	1.02e-17	1.28	up	190	173	256	103	29	84	0.04856	0.05596	0.0448	0.02494	0.01713	0.02035	0.04977	0.00464	0.02081	0.0032
GXT_22768529	ENST00000297029	GXL_35035	SCIN	85477	NC_000007	chr7	+	12610312	12693228	3137	16	1.42e-07	2.2e-06	-1.33	down	18	18	16	37	24	44	0.00301	0.00365	0.00184	0.00516	0.00861	0.00603	0.00283	0.00075	0.0066	0.00146
GXT_22768530	ENST00000341757	GXL_35035	SCIN	85477	NC_000007	chr7	+	12610203	12692729	2569	15	8.9e-07	1.23e-05	-1.45	down	13	15	10	29	22	32	0.00265	0.00367	0.0014	0.0049	0.00985	0.00516	0.00257	0.00093	0.00664	0.00227
GXT_22768536	ENST00000262067	GXL_34998	TSPAN13	27075	NC_000007	chr7	+	16793160	16824161	2093	6	5.73e-11	1.3e-09	1.21	up	72	55	127	34	15	35	0.01706	0.0161	0.02107	0.00758	0.00877	0.00809	0.01808	0.00215	0.00815	0.00049
GXT_22768581	ENST00000396300	GXL_779662	CREB5	9586	NC_000007	chr7	+	28475234	28859617	2319	11	3.98e-20	1.7e-18	2.41	up	56	32	84	13	2	13	0.01161	0.00912	0.01215	0.00278	0.00106	0.00258	0.01096	0.00132	0.00214	0.00077
GXT_22768587	ENST00000396257	GXL_35191	PLEKHA8	84725	NC_000007	chr7	+	30068041	30169088	1907	14	9.05e-08	1.44e-06	1.18	up	66	64	88	33	11	38	0.01654	0.0198	0.0148	0.00806	0.00579	0.00992	0.01705	0.00207	0.00792	0.00169
GXT_22768847	ENST00000275575	GXL_33674	PHTF2	57157	NC_000007	chr7	+	77428218	77586542	4541	17	3.29e-49	5.07e-47	1.06	up	922	646	1383	429	198	463	0.1005	0.08923	0.10465	0.04333	0.05005	0.0481	0.09813	0.00652	0.04716	0.00282
GXT_22768874	ENST00000394632	GXL_33545	STEAP2	261729	NC_000007	chr7	+	89841174	89866922	2072	6	7.34e-05	0.00068	-1.31	down	15	8	17	22	17	34	0.0038	0.00228	0.00296	0.00526	0.01007	0.00817	0.00301	0.00062	0.00783	0.00198
GXT_22768875	ENST00000394624	GXL_33545	STEAP2	261729	NC_000007	chr7	+	89841174	89866922	2236	7	0.00017	0.00142	-1.22	down	17	9	18	23	18	34	0.00399	0.00241	0.00291	0.0051	0.00988	0.00757	0.0031	0.00066	0.00752	0.00195
GXT_22769032	ENST00000249377	GXL_826880	LRRC17	10234	NC_000007	chr7	+	102553452	102585396	2002	5	0.000216	0.00176	3.64	up	8	7	9	0	0	2	0.00211	0.00236	0.00162	0	0	0.0005	0.00203	0.00031	0.00017	0.00024
GXT_22769052	ENST00000265717	GXL_78393	PRKAR2B	5577	NC_000007	chr7	+	106685094	106802256	3745	11	3.81e-35	3.33e-33	-2.17	down	21	15	23	78	40	93	0.0028	0.0027	0.00207	0.01006	0.0131	0.01183	0.00252	0.00032	0.01166	0.00125
GXT_22769451	ENST00000338238	GXL_42339	PTK2B	2185	NC_000008	chr8	+	27168999	27316903	4589	35	2.38e-182	6.3e-179	-1.36	down	747	598	1124	1975	881	2109	0.07644	0.07848	0.07853	0.18947	0.20882	0.19904	0.07782	0.00097	0.19911	0.0079
GXT_22769452	ENST00000397497	GXL_42339	PTK2B	2185	NC_000008	chr8	+	27288416	27310076	3161	18	4.24e-66	1.07e-63	-1.37	down	349	262	532	918	395	996	0.04941	0.0478	0.05052	0.12178	0.12914	0.12617	0.04924	0.00112	0.1257	0.00302
GXT_22769481	ENST00000338921	GXL_42336	NRG1	3084	NC_000008	chr8	+	32405753	32622066	2585	13	2.22e-26	1.32e-24	1.83	up	103	95	188	31	16	36	0.01908	0.0223	0.02354	0.00537	0.00695	0.00636	0.02164	0.00188	0.00623	0.00065
GXT_22769483	ENST00000356819	GXL_42336	NRG1	3084	NC_000008	chr8	+	32405753	32622066	2576	13	5.1e-27	3.13e-25	1.86	up	109	92	185	30	16	35	0.01986	0.02168	0.02315	0.00531	0.00685	0.00631	0.02156	0.00135	0.00616	0.00064
GXT_22769484	ENST00000287840	GXL_42336	NRG1	3084	NC_000008	chr8	+	32405753	32622066	2561	12	5.1e-27	3.13e-25	1.82	up	103	94	187	31	16	36	0.01925	0.02224	0.02361	0.00542	0.00702	0.00642	0.0217	0.00182	0.00629	0.00066
GXT_22769486	ENST00000287845	GXL_42336	NRG1	3084	NC_000008	chr8	+	32405753	32620856	1881	12	7.09e-29	4.77e-27	1.78	up	72	73	140	27	12	25	0.01742	0.02328	0.02312	0.00633	0.00694	0.00583	0.02127	0.00273	0.00637	0.00045
GXT_22769487	ENST00000341377	GXL_42336	NRG1	3084	NC_000008	chr8	+	32405753	32622066	2644	14	1.57e-54	2.77e-52	1.83	up	109	95	191	31	17	36	0.01935	0.02166	0.02323	0.00525	0.00697	0.00622	0.02141	0.00159	0.00615	0.0007
GXT_22769494	ENST00000276461	GXL_42441	ERLIN2	11160	NC_000008	chr8	+	37594145	37616619	6073	12	1.31e-142	1.62e-139	-1.83	down	357	281	582	1362	552	1513	0.02906	0.0298	0.03239	0.10693	0.10642	0.11984	0.03042	0.00143	0.11106	0.00621
GXT_22769645	ENST00000354370	GXL_67302	HNF4G	3174	NC_000008	chr8	+	76320271	76476562	1728	11	1.02e-05	0.000116	#NAME?	down	0	0	0	5	4	6	0	0	0	0.00115	0.00178	0.00145	0	0	0.00146	0.00026
GXT_22769646	ENST00000396423	GXL_67302	HNF4G	3174	NC_000008	chr8	+	76452104	76479078	4209	10	0.00212	0.0127	-2.48	down	2	0	3	8	4	6	0.00025	0	0.00026	0.00082	0.00088	0.00066	0.00017	0.00012	0.00079	9e-05
GXT_22769711	ENST00000287042	GXL_67351	KCNS2	3788	NC_000008	chr8	+	99439250	99445076	5219	2	0.00108	0.00717	1.76	up	9	15	21	7	1	4	0.0009	0.00194	0.00145	0.00067	0.00024	0.00038	0.00143	0.00042	0.00043	0.00018
GXT_22769728	ENST00000395861	GXL_67212	BAALC	79870	NC_000008	chr8	+	104152987	104240446	801	4	2.59e-09	4.9e-08	1.58	up	35	41	63	13	6	19	0.02292	0.03243	0.02661	0.00805	0.0092	0.01119	0.02732	0.00391	0.00948	0.0013
GXT_22769729	ENST00000330955	GXL_67212	BAALC	79870	NC_000008	chr8	+	104153126	104210388	222	2	4.86e-05	0.000471	3.34	up	5	9	17	0	0	3	0.01182	0.02734	0.02674	0	0	0.00673	0.02197	0.00718	0.00224	0.00317
GXT_22769730	ENST00000306391	GXL_67212	BAALC	79870	NC_000008	chr8	+	104153126	104195677	243	2	4.86e-05	0.000471	3.34	up	5	9	17	0	0	3	0.01079	0.02497	0.02443	0	0	0.00615	0.02006	0.00656	0.00205	0.0029
GXT_22769758	ENST00000378279	GXL_317009	C8orf85	441376	NC_000008	chr8	+	117950438	117956726	2299	2	3.02e-33	2.46e-31	-2.64	down	16	11	21	95	42	98	0.00342	0.00323	0.0033	0.02049	0.02242	0.02123	0.00332	8e-05	0.02138	0.0008
GXT_22769763	ENST00000259526	GXL_67385	NOV	4856	NC_000008	chr8	+	120428546	120436593	2522	5	8.4e-136	9.44e-133	-1.9	down	125	96	190	508	198	513	0.02538	0.02514	0.02664	0.09771	0.09106	0.09855	0.02572	0.00066	0.09577	0.00335
GXT_22769781	ENST00000399018	GXL_384293	FER1L6	654463	NC_000008	chr8	+	124968225	125132302	5859	40	0.00719	0.0355	1.26	up	7	4	13	1	3	1	0.00054	0.00035	0.00074	8e-05	0.00063	9e-05	0.00054	0.00016	0.00027	0.00026
GXT_22770290	ENST00000374928	GXL_827437	KLF8	11279	NC_000023	chrX	+	56258907	56295386	1548	4	0.00227	0.0135	-1.35	down	6	3	6	11	4	17	0.00203	0.00131	0.0014	0.00352	0.00317	0.00499	0.00158	0.00032	0.00389	0.00079
GXT_22770559	ENST00000372010	GXL_11927	PAK3	5063	NC_000023	chrX	+	110339588	110464159	2606	19	3.61e-06	4.48e-05	1.26	up	38	28	65	18	6	20	0.00644	0.00595	0.00832	0.00342	0.00236	0.00363	0.0069	0.00102	0.00314	0.00056
GXT_22770562	ENST00000372007	GXL_11927	PAK3	5063	NC_000023	chrX	+	110339605	110464159	2510	18	1.93e-06	2.53e-05	1.3	up	37	28	65	17	6	19	0.00648	0.00618	0.00864	0.00336	0.00245	0.00357	0.0071	0.0011	0.00313	0.00049
GXT_22770743	ENST00000342251	GXL_745112	AFF2	2334	NC_000023	chrX	+	147582228	148075954	7320	20	1.89e-21	8.78e-20	-1.18	down	72	42	88	145	50	181	0.00487	0.00375	0.00424	0.00948	0.00839	0.0117	0.00429	0.00046	0.00986	0.00138
GXT_22770744	ENST00000370458	GXL_745112	AFF2	2334	NC_000023	chrX	+	147582529	147985907	1489	8	0.00028	0.00221	-1.07	down	12	7	17	29	6	29	0.00388	0.00299	0.00388	0.00832	0.00495	0.00856	0.00358	0.00042	0.00728	0.00165
GXT_22770984	ENST00000272224	GXL_42228	GDF7	151449	NC_000002	chr2	+	20866424	20873418	4162	2	5.11e-05	0.000492	-1.39	down	4	8	16	28	8	23	0.0005	0.0013	0.00139	0.00334	0.00236	0.00275	0.00106	0.0004	0.00282	0.0004
GXT_22771087	ENST00000280527	GXL_42140	CRIM1	51232	NC_000002	chr2	+	36583069	36778278	5912	17	4.95e-141	5.95e-138	-1.31	down	7200	5905	11543	19373	7984	21002	0.6044	0.63517	0.66708	1.54576	1.57815	1.6771	0.63555	0.02559	1.60034	0.05587
GXT_22771176	ENST00000394479	GXL_693735	REL	5966	NC_000002	chr2	+	61108791	61150119	2398	10	0.00165	0.0103	1.26	up	19	14	26	9	3	8	0.00372	0.00337	0.00377	0.00145	0.00154	0.00166	0.00362	0.00018	0.00155	9e-05
GXT_22771622	ENST00000397010	GXL_193541	PPARG	5468	NC_000003	chr3	+	12328867	12475843	2017	8	7.07e-35	6.11e-33	-1.34	down	110	58	120	210	117	219	0.02641	0.01889	0.02096	0.0488	0.06578	0.05026	0.02209	0.00317	0.05495	0.00768
GXT_22771624	ENST00000397015	GXL_193541	PPARG	5468	NC_000003	chr3	+	12329400	12475810	1722	7	5.31e-35	4.61e-33	-1.31	down	110	58	124	208	117	218	0.03091	0.02212	0.02539	0.05671	0.07744	0.05882	0.02614	0.00363	0.06432	0.00931
GXT_22771625	ENST00000397012	GXL_193541	PPARG	5468	NC_000003	chr3	+	12330337	12475843	2006	8	5.34e-35	4.63e-33	-1.33	down	111	58	120	210	117	219	0.02682	0.01899	0.02107	0.04907	0.06614	0.05054	0.02229	0.00331	0.05525	0.00772
GXT_22771630	ENST00000397000	GXL_193541	PPARG	5468	NC_000003	chr3	+	12353887	12475715	1122	6	5.28e-22	2.55e-20	-1.27	down	87	37	80	152	78	142	0.03698	0.02163	0.02508	0.06306	0.07739	0.05768	0.0279	0.00658	0.06604	0.00832
GXT_22771633	ENST00000397023	GXL_193541	PPARG	5468	NC_000003	chr3	+	12393068	12475843	2002	8	9.23e-36	8.33e-34	-1.3	down	108	57	120	205	113	210	0.02622	0.01886	0.02112	0.04817	0.06481	0.04912	0.02207	0.00308	0.05403	0.00763
GXT_22771764	ENST00000314529	GXL_169641	ZNF620	253639	NC_000003	chr3	+	40547530	40560227	3291	5	0.00602	0.0306	1.72	up	8	9	14	2	1	5	0.00128	0.00184	0.00149	0.0003	0.00037	0.00076	0.00154	0.00023	0.00048	0.0002
GXT_22771834	ENST00000313049	GXL_694078	PTH1R	5745	NC_000003	chr3	+	46924847	46945284	2123	14	0.00315	0.0178	-2.08	down	4	0	3	11	4	6	0.00074	0	0.00051	0.00234	0.00231	0.00141	0.00042	0.00031	0.00202	0.00043
GXT_22771835	ENST00000313063	GXL_694078	PTH1R	5745	NC_000003	chr3	+	46930275	46951581	2895	12	0.000268	0.00213	-2.6	down	3	0	2	11	4	7	0.00044	0	0.00025	0.00171	0.0017	0.0012	0.00023	0.00018	0.00154	0.00024
GXT_22772103	ENST00000264234	GXL_925870	UPK1B/C3orf30	-2	NC_000003	chr3	+	118892365	118924000	2118	8	0.000459	0.0034	1.92	up	11	7	20	5	1	2	0.00248	0.00223	0.00307	0.00094	0.00058	0.00047	0.00259	0.00035	0.00066	0.0002
GXT_22772247	ENST00000338446	GXL_119213	FAIM	55179	NC_000003	chr3	+	138327451	138352218	1622	6	1.14e-28	7.55e-27	-1.03	down	132	96	188	260	132	251	0.03913	0.03908	0.04036	0.07702	0.09615	0.07553	0.03952	0.00059	0.0829	0.00939
GXT_22772252	ENST00000393036	GXL_119213	FAIM	55179	NC_000003	chr3	+	138338569	138352211	896	5	3.82e-18	1.46e-16	-1.05	down	102	80	151	220	108	194	0.05477	0.05904	0.05915	0.11857	0.14251	0.10612	0.05765	0.00204	0.1224	0.0151
GXT_22772328	ENST00000295930	GXL_232703	RSRC1	51319	NC_000003	chr3	+	157827841	158262624	1727	10	3.53e-20	1.51e-18	-1.22	down	88	48	138	211	76	206	0.02429	0.0164	0.02454	0.05339	0.04692	0.05222	0.02174	0.00378	0.05084	0.00282
GXT_22772329	ENST00000312179	GXL_232703	RSRC1	51319	NC_000003	chr3	+	157827895	158262582	1443	9	1.88e-21	8.74e-20	-1.29	down	65	31	104	161	55	162	0.02116	0.01278	0.0218	0.04863	0.04128	0.04956	0.01858	0.00411	0.04649	0.0037
GXT_22772371	ENST00000064724	GXL_232579	CLDN11	5010	NC_000003	chr3	+	170136653	170151887	2169	3	6.43e-13	1.72e-11	1.78	up	45	28	65	15	6	9	0.01088	0.00839	0.01083	0.0032	0.0034	0.00207	0.01003	0.00116	0.00289	0.00059
GXT_22772545	ENST00000260795	GXL_164857	FGFR3	2261	NC_000004	chr4	+	1795560	1810598	4132	17	3.43e-06	4.27e-05	-1.63	down	10	5	11	25	11	27	0.00127	0.00065	0.00096	0.00276	0.00327	0.00301	0.00096	0.00025	0.00301	0.00021
GXT_22772546	ENST00000352904	GXL_164857	FGFR3	2261	NC_000004	chr4	+	1795623	1810598	3733	15	0.000442	0.00329	-1.35	down	9	5	11	21	9	19	0.00126	0.00072	0.00106	0.00258	0.00296	0.00232	0.00101	0.00022	0.00262	0.00026
GXT_22772585	ENST00000389653	GXL_164651	DOK7	285489	NC_000004	chr4	+	3465033	3502552	1897	10	0.000175	0.00146	-1.39	down	2	9	2	15	5	15	0.00055	0.0032	0.00026	0.00366	0.00324	0.00394	0.00134	0.00132	0.00361	0.00029
GXT_22772587	ENST00000322004	GXL_164651	DOK7	285489	NC_000004	chr4	+	3478141	3496209	2082	4	2.09e-06	2.72e-05	-1.51	down	6	12	5	23	11	26	0.00151	0.00389	0.00076	0.00524	0.00614	0.00622	0.00205	0.00133	0.00587	0.00044
GXT_22773083	ENST00000393843	GXL_175048	NPY2R	4887	NC_000004	chr4	+	156135050	156136258	1209	1	8.62e-15	2.65e-13	-1.12	down	38	38	50	89	38	98	0.01649	0.02118	0.01494	0.0365	0.03857	0.04036	0.01754	0.00265	0.03848	0.00158
GXT_22773269	ENST00000254691	GXL_45357	CARD6	84674	NC_000005	chr5	+	40841469	40855456	4038	3	7.29e-13	1.94e-11	-1.03	down	99	57	123	167	92	164	0.01285	0.00952	0.01092	0.02051	0.02797	0.02023	0.0111	0.00137	0.0229	0.00358
GXT_22773373	ENST00000282886	GXL_383424	MARVELD2	153562	NC_000005	chr5	+	68710954	68728461	1349	4	0.0108	0.0493	-1.85	down	1	1	2	6	0	8	0.00039	0.0005	0.00054	0.00221	0	0.00295	0.00048	6e-05	0.00172	0.00125
GXT_22773618	ENST00000296877	GXL_27415	LEAP2	116842	NC_000005	chr5	+	132208014	132210738	2207	3	0.00619	0.0314	-2.2	down	0	1	2	8	0	5	0	0.00031	0.00033	0.0018	0	0.0009	0.00021	0.00015	0.0009	0.00073
GXT_22773871	ENST00000274631	GXL_27406	CCDC99	54908	NC_000005	chr5	+	169010638	169031779	2369	10	2.66e-40	2.93e-38	1.21	up	465	333	684	183	84	240	0.0993	0.09164	0.09808	0.03691	0.04198	0.04877	0.09634	0.00336	0.04255	0.00486
GXT_22774016	ENST00000367882	GXL_232896	TCF21/FLJ35700	-2	NC_000006	chr6	+	134210276	134216691	4551	2	1.34e-59	2.8e-57	-1.59	down	138	95	194	436	153	448	0.01579	0.01407	0.01532	0.04718	0.04074	0.04864	0.01506	0.00073	0.04552	0.00343
GXT_22774250	ENST00000379409	GXL_106484	PLEKHN1	84069	NC_000001	chr1	+	901877	910476	2548	15	0.00383	0.021	1.03	up	15	22	30	17	5	4	0.00309	0.00529	0.00397	0.00292	0.00242	0.00078	0.00412	0.0009	0.00204	0.00091
GXT_22774310	ENST00000378483	GXL_316511	PLCH2	9651	NC_000001	chr1	+	2409915	2436969	3951	6	3.79e-07	5.54e-06	2.84	up	17	16	18	3	1	2	0.00226	0.00256	0.0016	0.00038	0.00013	0.00025	0.00214	0.0004	0.00025	0.0001
GXT_22774311	ENST00000343889	GXL_316511	PLCH2	9651	NC_000001	chr1	+	2410529	2436969	6454	19	9.56e-08	1.52e-06	2.21	up	22	24	30	7	2	5	0.00171	0.00225	0.00159	0.00054	0.00019	0.00031	0.00185	0.00029	0.00035	0.00015
GXT_22774312	ENST00000278878	GXL_316511	PLCH2	9651	NC_000001	chr1	+	2411327	2436964	4033	19	8.64e-05	0.000785	1.84	up	17	17	21	7	2	4	0.00208	0.00251	0.0018	0.00086	0.0003	0.00037	0.00213	0.00029	0.00051	0.00025
GXT_22774924	ENST00000373045	GXL_316525	MANEAL	149175	NC_000001	chr1	+	38259474	38266805	2685	4	0.000118	0.00103	-1.35	down	8	8	25	22	16	35	0.00156	0.00201	0.00323	0.00406	0.00686	0.00649	0.00227	0.00071	0.0058	0.00124
GXT_22774927	ENST00000329006	GXL_316525	MANEAL	149175	NC_000001	chr1	+	38261160	38266809	1930	2	0.000676	0.00478	-1.23	down	8	7	19	19	11	29	0.00217	0.00245	0.00348	0.00488	0.00661	0.00748	0.0027	0.00056	0.00632	0.00108
GXT_22775119	ENST00000271153	GXL_46989	CYP4B1	1580	NC_000001	chr1	+	47264754	47285085	2135	12	1.39e-07	2.16e-06	#NAME?	down	0	0	0	12	2	7	0	0	0	0.00255	0.00115	0.00163	0	0	0.00178	0.00058
GXT_22775268	ENST00000349533	GXL_925421	LEPR	3953	NC_000001	chr1	+	65886335	66107242	8227	20	3.93e-65	9.76e-63	-1.1	down	3610	2587	5493	8455	3220	7974	0.20882	0.1928	0.2192	0.46584	0.43941	0.44117	0.20694	0.01086	0.44881	0.01207
GXT_22775278	ENST00000237247	GXL_228197	SGIP1	84251	NC_000001	chr1	+	66999066	67210057	3997	27	1.04e-39	1.11e-37	1.42	up	196	94	233	69	22	66	0.0226	0.0145	0.0184	0.00757	0.00614	0.00723	0.0185	0.00331	0.00698	0.00061
GXT_22775279	ENST00000371039	GXL_228197	SGIP1	84251	NC_000001	chr1	+	66999275	67210768	4080	22	1.28e-37	1.26e-35	1.45	up	205	105	262	74	23	71	0.02323	0.01587	0.02053	0.00802	0.00632	0.00769	0.01988	0.00304	0.00734	0.00074
GXT_22775281	ENST00000371037	GXL_228197	SGIP1	84251	NC_000001	chr1	+	66999965	67210768	4554	25	3.64e-38	3.66e-36	1.47	up	204	104	258	72	22	71	0.02096	0.0143	0.01823	0.00697	0.00539	0.00689	0.01783	0.00273	0.00642	0.00073
GXT_22775300	ENST00000371000	GXL_228166	IL12RB2	3595	NC_000001	chr1	+	67773047	67862583	3940	15	1.93e-06	2.53e-05	-2.25	down	4	3	3	20	7	13	0.0004	0.00051	0.00018	0.00252	0.00218	0.00152	0.00036	0.00014	0.00207	0.00042
GXT_22775339	ENST00000370806	GXL_228123	AK5	26289	NC_000001	chr1	+	77747736	78025654	3251	14	6.59e-62	1.49e-59	1.89	up	324	229	431	87	34	92	0.04742	0.04273	0.04262	0.0125	0.01055	0.01323	0.04426	0.00224	0.01209	0.00113
GXT_22775416	ENST00000330947	GXL_228281	LRRC8B	23507	NC_000001	chr1	+	89990462	90063423	7593	6	5.23e-06	6.29e-05	-1.49	down	9	7	18	35	12	26	0.00062	0.00062	0.00086	0.00222	0.00194	0.0017	0.0007	0.00011	0.00195	0.00021
GXT_22775474	ENST00000370185	GXL_228134	LPPR4	9890	NC_000001	chr1	+	99729509	99775146	5369	7	2.16e-05	0.000228	-1.26	down	14	9	15	32	12	30	0.00127	0.001	0.00101	0.00296	0.00274	0.00279	0.00109	0.00012	0.00283	9e-05
GXT_22775475	ENST00000263178	GXL_228134	LPPR4	9890	NC_000001	chr1	+	99729848	99772111	1892	8	0.00135	0.00868	-1.55	down	6	4	3	12	7	12	0.00139	0.00107	0.00057	0.00314	0.00454	0.00316	0.00101	0.00034	0.00361	0.00066
GXT_22775499	ENST00000370124	GXL_228350	CDC14A	8556	NC_000001	chr1	+	100818058	100950300	1883	11	0.00177	0.0109	-1.41	down	8	4	23	16	17	24	0.00195	0.00143	0.00368	0.00369	0.00717	0.00503	0.00235	0.00096	0.0053	0.00143
GXT_22775513	ENST00000338852	GXL_925435	AMY2B	280	NC_000001	chr1	+	104113597	104122122	1831	11	0.000476	0.00351	-2.15	down	2	1	4	10	3	11	0.00042	0.00037	0.00079	0.00271	0.00201	0.00272	0.00053	0.00019	0.00248	0.00033
GXT_22775522	ENST00000370076	GXL_693119	NTNG1	22854	NC_000001	chr1	+	107682629	107950354	1829	5	0.000219	0.00178	2.14	up	10	8	12	0	2	2	0.00287	0.00258	0.00237	0	0.00134	0.00054	0.00261	0.0002	0.00063	0.00055
GXT_22775525	ENST00000370068	GXL_693119	NTNG1	22854	NC_000001	chr1	+	107683442	108025030	4034	8	1.16e-05	0.00013	2.35	up	14	10	16	1	2	2	0.00182	0.00157	0.00143	0.00012	0.00061	0.00025	0.00161	0.00016	0.00033	0.00021
GXT_22775526	ENST00000294649	GXL_693119	NTNG1	22854	NC_000001	chr1	+	107683549	107953207	4703	5	2.1e-05	0.000223	1.99	up	14	10	17	1	3	2	0.00156	0.00135	0.0013	0.00011	0.00078	0.00021	0.0014	0.00011	0.00037	0.0003
GXT_22775527	ENST00000370067	GXL_693119	NTNG1	22854	NC_000001	chr1	+	107683661	108026080	4628	7	1.16e-05	0.00013	2.35	up	14	10	16	1	2	2	0.00159	0.00137	0.00125	0.00011	0.00053	0.00022	0.0014	0.00014	0.00029	0.00018
GXT_22775587	ENST00000329608	GXL_228216	CSF1	1435	NC_000001	chr1	+	110453255	110473614	4210	9	7.45e-111	5.42e-108	-1.08	down	1127	987	1743	2591	1119	2739	0.13677	0.1541	0.14576	0.29867	0.31739	0.31771	0.14554	0.00708	0.31126	0.0089
GXT_22775588	ENST00000344188	GXL_228216	CSF1	1435	NC_000001	chr1	+	110453233	110472355	2625	10	1.8e-84	7.28e-82	-1.01	down	633	550	1040	1458	597	1484	0.12062	0.13512	0.13702	0.26509	0.26493	0.27144	0.13092	0.00732	0.26715	0.00303
GXT_22775691	ENST00000369409	GXL_228233	PHGDH	26227	NC_000001	chr1	+	120254510	120286838	1913	12	7.62e-31	5.62e-29	1.38	up	267	209	380	112	38	120	0.06745	0.06521	0.0644	0.02618	0.02184	0.02786	0.06569	0.00129	0.02529	0.00254
GXT_22775894	ENST00000368680	GXL_57598	NPR1	4881	NC_000001	chr1	+	153651113	153666468	4236	22	0.00066	0.00468	-3.28	down	1	0	2	6	5	6	0.00012	0	0.00017	0.00059	0.00145	0.00052	0.0001	7e-05	0.00085	0.00042
GXT_22775950	ENST00000368419	GXL_925479	ADAM15/DCST1	-2	NC_000001	chr1	+	155006446	155021740	2207	16	0.00824	0.0396	#NAME?	down	0	0	0	4	1	1	0	0	0	0.00079	0.00056	0.00023	0	0	0.00053	0.00023
GXT_22775969	ENST00000392451	GXL_57765	TRIM46	80128	NC_000001	chr1	+	155146346	155156733	2482	11	1.28e-21	6e-20	-1.23	down	69	37	99	144	67	150	0.01342	0.00951	0.01397	0.02757	0.03166	0.028	0.0123	0.00199	0.02908	0.00184
GXT_22776102	ENST00000368124	GXL_925488	DARC/CADM3	-2	NC_000001	chr1	+	159141399	159171802	2546	10	5.91e-95	3.1e-92	-1.84	down	180	135	260	678	277	664	0.03647	0.03522	0.03462	0.12442	0.12273	0.12312	0.03544	0.00077	0.12342	0.00072
GXT_22776103	ENST00000368125	GXL_925488	DARC/CADM3	-2	NC_000001	chr1	+	159141399	159173103	3745	9	1.14e-217	4.99e-214	-1.87	down	232	176	352	900	374	900	0.03207	0.03133	0.03241	0.11404	0.11523	0.11508	0.03194	0.00045	0.11478	0.00053
GXT_22776104	ENST00000368122	GXL_925488	DARC/CADM3	-2	NC_000001	chr1	+	159173097	159176290	1907	3	2.54e-22	1.24e-20	-2.25	down	12	6	21	55	28	49	0.00291	0.00212	0.00398	0.0143	0.01803	0.0128	0.003	0.00076	0.01504	0.0022
GXT_22776199	ENST00000367953	GXL_57787	FCRLA	84824	NC_000001	chr1	+	161677055	161684138	2066	6	0.00897	0.0425	1.66	up	12	7	17	5	0	6	0.00305	0.00228	0.00297	0.0012	0	0.00145	0.00277	0.00035	0.00088	0.00063
GXT_22776224	ENST00000367909	GXL_57646	RGS4	5999	NC_000001	chr1	+	163038935	163046592	3200	5	1.16e-278	1.24e-274	1.86	up	8424	6220	12694	2533	952	2494	1.32855	1.26552	1.38202	0.37449	0.35183	0.37471	1.32536	0.04761	0.36701	0.01073
GXT_22776226	ENST00000367906	GXL_57646	RGS4	5999	NC_000001	chr1	+	163041834	163044606	930	5	1.05e-259	8.79e-256	1.88	up	3275	2375	4918	994	362	920	1.69445	1.59216	1.76437	0.47839	0.43769	0.45347	1.68366	0.07072	0.45652	0.01675
GXT_22776548	ENST00000343110	GXL_120913	PRELP	5549	NC_000001	chr1	+	203444956	203460480	5747	3	3.13e-101	1.87e-98	-1.17	down	1120	1036	1817	2923	1222	2946	0.10027	0.11843	0.11218	0.24826	0.25775	0.25197	0.11029	0.00753	0.25266	0.0039
GXT_22776565	ENST00000367204	GXL_120859	SOX13	9580	NC_000001	chr1	+	204042732	204096863	3593	14	4.64e-14	1.35e-12	-1.08	down	58	47	101	158	54	133	0.00832	0.00853	0.00959	0.02015	0.01709	0.01738	0.00881	0.00056	0.01821	0.00138
GXT_22776671	ENST00000367029	GXL_120951	G0S2	50486	NC_000001	chr1	+	209848765	209849733	866	2	1.26e-19	5.23e-18	-1.95	down	17	15	17	77	27	54	0.00994	0.01168	0.00709	0.0441	0.03828	0.03106	0.00957	0.00189	0.03781	0.00533
GXT_22776742	ENST00000366929	GXL_779437	TGFB2	7042	NC_000001	chr1	+	218519577	218617961	5053	8	1e-57	1.99e-55	-1.06	down	356	289	628	907	308	914	0.03519	0.03655	0.04359	0.08608	0.07045	0.08748	0.03844	0.00368	0.08134	0.00772
GXT_22776743	ENST00000366930	GXL_779437	TGFB2	7042	NC_000001	chr1	+	218519577	218617961	4969	7	7.8e-58	1.56e-55	-1.06	down	355	289	627	905	307	913	0.03568	0.03717	0.04426	0.08738	0.07139	0.08886	0.03904	0.00374	0.08254	0.00791
GXT_22777059	ENST00000392954	GXL_57979	ARHGEF4	50649	NC_000002	chr2	+	131674224	131804836	3486	13	1.49e-15	4.84e-14	-1.39	down	39	27	54	96	47	98	0.00542	0.00503	0.0056	0.01282	0.0162	0.01327	0.00535	0.00024	0.0141	0.0015
GXT_22777061	ENST00000355771	GXL_57979	ARHGEF4	50649	NC_000002	chr2	+	131769256	131803762	1872	11	2.54e-11	5.92e-10	-1.37	down	33	13	35	70	31	56	0.00841	0.00432	0.00676	0.01643	0.01968	0.01344	0.0065	0.00168	0.01652	0.00255
GXT_22777071	ENST00000295171	GXL_1230357	CCDC74A	90557	NC_000002	chr2	+	132285406	132291239	1543	8	1.36e-05	0.00015	-1.05	down	31	17	36	45	28	57	0.00936	0.0063	0.0081	0.01232	0.02148	0.01711	0.00792	0.00126	0.01697	0.00374
GXT_22777089	ENST00000272643	GXL_482238	THSD7B	80731	NC_000002	chr2	+	137639749	138435287	5943	28	0.00102	0.00679	-1.96	down	1	2	6	12	4	10	9e-05	0.00023	0.00036	0.00092	0.00062	0.00075	0.00023	0.00011	0.00076	0.00012
GXT_22777099	ENST00000241416	GXL_57948	ACVR2A	92	NC_000002	chr2	+	148602086	148688393	5728	11	1.56e-28	1.03e-26	-1.05	down	139	92	194	267	117	303	0.01186	0.01036	0.01192	0.02172	0.02464	0.02495	0.01138	0.00072	0.02377	0.00146
GXT_22777194	ENST00000264106	GXL_57963	ITGA6	3655	NC_000002	chr2	+	173292314	173371181	5797	26	2.7e-104	1.75e-101	-1.15	down	500	442	845	1224	531	1360	0.04228	0.04791	0.04863	0.09771	0.10351	0.10948	0.04627	0.00284	0.10357	0.00481
GXT_22777195	ENST00000375221	GXL_57963	ITGA6	3655	NC_000002	chr2	+	173292314	173371181	5927	27	3.77e-102	2.33e-99	-1.15	down	509	449	855	1245	539	1383	0.04195	0.04766	0.04811	0.09698	0.10282	0.10881	0.04591	0.0028	0.10287	0.00483
GXT_22777196	ENST00000264107	GXL_57963	ITGA6	3655	NC_000002	chr2	+	173292283	173370958	5618	26	2.5e-101	1.5e-98	-1.15	down	508	449	853	1243	538	1382	0.04416	0.05028	0.05063	0.10214	0.10826	0.11471	0.04836	0.00297	0.10837	0.00513
GXT_22777197	ENST00000343713	GXL_57963	ITGA6	3655	NC_000002	chr2	+	173292314	173371181	5795	26	2.04e-106	1.37e-103	-1.16	down	491	433	830	1207	526	1345	0.04148	0.04703	0.04791	0.09647	0.10297	0.1085	0.04547	0.00285	0.10265	0.00492
GXT_22777240	ENST00000234453	GXL_57928	PLEKHA3	65977	NC_000002	chr2	+	179345195	179370093	2784	8	1.67e-34	1.41e-32	-1.26	down	97	63	130	231	86	238	0.01734	0.01405	0.0161	0.0391	0.03702	0.0399	0.01583	0.00136	0.03867	0.00121
GXT_22777382	ENST00000358768	GXL_925789	PARD3B	117583	NC_000002	chr2	+	205410723	206480537	3432	22	2.85e-56	5.41e-54	-1.22	down	169	99	220	366	154	360	0.02344	0.01866	0.02084	0.04797	0.04972	0.04803	0.02098	0.00195	0.04857	0.00081
GXT_22777383	ENST00000351153	GXL_925789	PARD3B	117583	NC_000002	chr2	+	205410723	206480537	3411	22	2.81e-57	5.5e-55	-1.22	down	166	99	212	360	153	352	0.02301	0.01878	0.02035	0.04743	0.04966	0.04742	0.02071	0.00175	0.04817	0.00105
GXT_22777585	ENST00000264059	GXL_925811	EFHD1	80303	NC_000002	chr2	+	233497938	233547491	2259	4	2.78e-40	3.06e-38	-1.83	down	63	48	110	228	119	238	0.0144	0.01373	0.01711	0.04894	0.06303	0.05124	0.01508	0.00146	0.0544	0.00617
GXT_22777643	ENST00000343063	GXL_119535	ESPNL	339768	NC_000002	chr2	+	239008798	239041928	4836	9	2.13e-11	5.01e-10	-1.27	down	26	24	39	75	26	76	0.00282	0.00321	0.00291	0.00769	0.0066	0.00783	0.00298	0.00017	0.00737	0.00055
GXT_22777786	ENST00000329385	GXL_479534	LOC728008	0	NC_000011	chr11	-	1910375	1911370	996	1	0.00217	0.013	-1.04	down	16	7	19	25	13	26	0.00843	0.00474	0.00688	0.01245	0.01602	0.013	0.00668	0.00151	0.01382	0.00157
GXT_22777822	ENST00000377489	GXL_41560	RASGRP2	10235	NC_000011	chr11	-	64508338	64512805	583	5	0.0106	0.0485	-2.26	down	2	0	2	7	2	5	0.0018	0	0.00062	0.0051	0.00211	0.00342	0.00081	0.00075	0.00354	0.00122
GXT_22777824	ENST00000377487	GXL_41560	RASGRP2	10235	NC_000011	chr11	-	64508338	64512331	642	5	0.0106	0.0485	-2.26	down	2	0	2	7	2	5	0.00163	0	0.00056	0.00463	0.00191	0.0031	0.00073	0.00068	0.00321	0.00111
GXT_22777825	ENST00000394429	GXL_41560	RASGRP2	10235	NC_000011	chr11	-	64508338	64510409	453	3	0.01	0.0464	-2.69	down	1	0	1	5	1	4	0.00116	0	0.00033	0.00478	0.00123	0.00372	0.0005	0.00049	0.00324	0.00149
GXT_22778219	ENST00000360654	GXL_3391	TLE2	7089	NC_000019	chr19	-	2997637	3006558	1088	7	3.97e-07	5.77e-06	-1.47	down	10	9	12	33	9	33	0.00457	0.00496	0.00365	0.0135	0.00854	0.01305	0.00439	0.00055	0.0117	0.00224
GXT_22778292	ENST00000360227	GXL_73781	ZNF667	63934	NC_000019	chr19	-	56952537	56953985	973	3	0.00402	0.0219	-1.2	down	5	6	16	15	9	21	0.0027	0.00416	0.00594	0.00764	0.01136	0.01075	0.00427	0.00132	0.00992	0.00163
GXT_22778506	ENST00000373694	GXL_122630	SAMHD1	25939	NC_000020	chr20	-	35526174	35580176	1822	14	2.07e-132	2.24e-129	-2.04	down	303	208	493	1320	580	1217	0.07552	0.06743	0.08523	0.31453	0.34121	0.29749	0.07606	0.00728	0.31774	0.01799
GXT_22779046	ENST00000395214	GXL_172591	PTK2	5747	NC_000008	chr8	-	141668501	141843111	3753	28	1.43e-95	7.61e-93	1.15	up	1181	881	1771	546	211	626	0.14795	0.14169	0.15281	0.06679	0.06292	0.07455	0.14748	0.00455	0.06809	0.00484
GXT_22779104	ENST00000375710	GXL_190074	ROR2	4920	NC_000009	chr9	-	94473787	94711172	2719	12	2.08e-12	5.3e-11	-1.69	down	11	15	30	51	29	53	0.00193	0.00372	0.00391	0.0093	0.01219	0.00868	0.00319	0.00089	0.01006	0.00153
GXT_22779471	ENST00000380235	GXL_40604	FRY	10129	NC_000013	chr13	+	32605437	32850701	8845	57	6.81e-27	4.16e-25	-1.07	down	139	117	228	338	144	303	0.00783	0.0082	0.00844	0.01715	0.01685	0.0156	0.00816	0.00025	0.01653	0.00067
GXT_22779694	ENST00000313648	GXL_102536	LGALS9	3965	NC_000017	chr17	+	25958174	25976459	1378	9	0.0107	0.0491	-1.61	down	3	2	5	10	5	7	0.00114	0.00098	0.00131	0.0036	0.00445	0.00217	0.00114	0.00013	0.00341	0.00094
GXT_22779836	ENST00000396468	GXL_692909	LOC339352	339352	NC_000019	chr19	+	52101797	52104962	871	4	0.0085	0.0407	-1.64	down	0	3	3	6	2	9	0	0.00232	0.00124	0.00342	0.00282	0.00515	0.00119	0.00095	0.0038	0.00099
GXT_22779918	ENST00000372591	GXL_693058	FOXO6	100132074	NC_000001	chr1	+	41827594	41849262	2398	2	0.00661	0.0331	1.06	up	19	13	29	14	3	7	0.00416	0.00366	0.00437	0.00289	0.00154	0.00145	0.00406	0.0003	0.00196	0.00066
GXT_22779949	ENST00000370807	GXL_228123	AK5	26289	NC_000001	chr1	+	77747662	77780745	2302	6	6.25e-25	3.46e-23	1.63	up	111	79	146	49	8	39	0.0237	0.02112	0.02152	0.01034	0.00373	0.00844	0.02211	0.00113	0.0075	0.00278
GXT_22779968	ENST00000370070	GXL_693119	NTNG1	22854	NC_000001	chr1	+	107682639	108024092	2721	7	1.82e-05	0.000196	2.33	up	12	11	16	1	2	2	0.00231	0.00248	0.00212	0.00018	0.0009	0.00037	0.0023	0.00015	0.00048	0.0003
GXT_22780001	ENST00000367959	GXL_57787	FCRLA	84824	NC_000001	chr1	+	161676762	161684141	2362	6	0.00823	0.0396	1.28	up	12	10	20	6	2	6	0.00267	0.00285	0.00306	0.00126	0.00104	0.00127	0.00286	0.00016	0.00119	0.00011
GXT_22780123	ENST00000400532	GXL_693482	JAM2	58494	NC_000021	chr21	+	27011584	27086885	1757	10	5.82e-26	3.4e-24	-1.05	down	164	132	256	435	142	337	0.04555	0.04572	0.04982	0.11574	0.09616	0.09059	0.04703	0.00197	0.10083	0.01079
GXT_22780124	ENST00000312957	GXL_693482	JAM2	58494	NC_000021	chr21	+	27011589	27087235	1693	10	1.79e-47	2.55e-45	-1.05	down	180	147	287	468	162	380	0.05227	0.05302	0.05819	0.1297	0.1143	0.10598	0.05449	0.00263	0.11666	0.00983
GXT_22780139	ENST00000398928	GXL_176086	KCNJ15	3772	NC_000021	chr21	+	39628663	39671653	715	4	0.00432	0.0232	1.04	up	20	19	33	10	4	15	0.01467	0.01792	0.01646	0.00693	0.00687	0.00934	0.01635	0.00133	0.00771	0.00115
GXT_22780141	ENST00000398927	GXL_176086	KCNJ15	3772	NC_000021	chr21	+	39668479	39671653	665	3	0.00432	0.0232	1.04	up	20	19	33	10	4	15	0.01578	0.01926	0.01769	0.00746	0.00738	0.01004	0.01758	0.00142	0.00829	0.00124
GXT_22780230	ENST00000360990	GXL_1230033	KCNIP3	30818	NC_000002	chr2	+	95975970	96051824	2798	9	4.57e-10	9.41e-09	-1.72	down	5	11	15	36	11	41	0.00094	0.0025	0.00194	0.00638	0.00483	0.00722	0.00179	0.00065	0.00614	0.00099
GXT_22780265	ENST00000373640	GXL_1230959	C2orf72	257407	NC_000002	chr2	+	231902205	231914429	3657	3	0.00854	0.0408	-3.31	down	1	0	0	2	1	6	0.00014	0	0	0.00027	0.00034	0.00082	5e-05	7e-05	0.00048	0.00024
GXT_22780316	ENST00000392479	GXL_232555	ST6GAL1	6480	NC_000003	chr3	+	186790637	186796341	3266	3	6.77e-49	1.03e-46	-2.06	down	49	36	68	205	92	200	0.00786	0.00743	0.00722	0.0302	0.03383	0.02988	0.0075	0.00027	0.0313	0.00179
GXT_22780373	ENST00000389074	GXL_694441	FAM159B	100132916	NC_000005	chr5	+	63986135	64013897	847	3	0.0031	0.0175	-3.37	down	0	0	2	6	2	4	0	0	0.00043	0.00351	0.0029	0.00235	0.00014	0.0002	0.00292	0.00047
GXT_22780503	ENST00000366793	GXL_232835	SMOC2	64094	NC_000006	chr6	+	168841831	169064792	1544	12	0.00405	0.022	-1.87	down	2	3	3	4	7	10	0.00068	0.00131	0.0007	0.00096	0.00398	0.00258	0.0009	0.00029	0.00251	0.00123
GXT_22780592	ENST00000396419	GXL_67302	HNF4G	3174	NC_000008	chr8	+	76320177	76465341	410	5	0.000894	0.00608	#NAME?	down	0	0	0	3	3	3	0	0	0	0.00242	0.00449	0.00295	0	0	0.00329	0.00088
GXT_22780626	ENST00000396613	GXL_15227	GLIPR2	152007	NC_000009	chr9	+	36147782	36163887	1821	4	2.27e-56	4.33e-54	1.03	up	842	629	1099	386	192	394	0.23125	0.22568	0.20946	0.10208	0.12421	0.1043	0.22213	0.00924	0.1102	0.00995
GXT_22780627	ENST00000377949	GXL_15227	GLIPR2	152007	NC_000009	chr9	+	36147782	36163887	1743	3	1.75e-58	3.54e-56	1.04	up	796	600	1042	361	178	381	0.23199	0.22695	0.20931	0.10083	0.12231	0.10668	0.22275	0.00972	0.10994	0.00907
GXT_22780649	ENST00000374885	GXL_827313	TMEFF1	8577	NC_000009	chr9	+	103189559	103212987	786	4	8.75e-47	1.2e-44	1.04	up	374	289	526	185	86	176	0.23898	0.23998	0.23465	0.11376	0.12961	0.10955	0.23787	0.00231	0.11764	0.00864
GXT_22780833	AK311814	GXL_227906	CXCL12	6387	NC_000010	chr10	-	44868776	44880543	372	4	3.8e-59	7.84e-57	1.41	up	293	224	438	137	37	125	0.3421	0.33335	0.37137	0.15206	0.10561	0.13718	0.34894	0.01626	0.13162	0.01937
GXT_22780875	AK311094	GXL_228003	LOC100507213	100507213	NC_000010	chr10	-	11606143	11607637	1495	1	0.00491	0.0258	1.04	up	21	16	36	11	3	16	0.00737	0.00722	0.0087	0.00363	0.00246	0.00533	0.00776	0.00067	0.00381	0.00118
GXT_22780878	AK308385	GXL_227949	AKR1C2	1646	NC_000010	chr10	-	5032085	5046052	1022	8	4.34e-10	8.97e-09	-1.01	down	57	37	95	108	53	125	0.02446	0.01913	0.02796	0.04415	0.05332	0.0499	0.02385	0.00363	0.04912	0.00378
GXT_22780890	AK308240	GXL_227900	ITGA8	8516	NC_000010	chr10	-	15655704	15761851	1589	15	4.83e-09	8.86e-08	-1.16	down	34	20	34	66	25	70	0.01023	0.00764	0.00614	0.01779	0.01854	0.01881	0.008	0.00169	0.01838	0.00043
GXT_22780917	AK313149	GXL_197091	PPP1R3C	5507	NC_000010	chr10	-	93389684	93392828	1056	2	2.29e-73	6.95e-71	-1.2	down	710	556	1040	1723	738	1680	0.35073	0.34991	0.35139	0.801	0.8464	0.78299	0.35068	0.00061	0.81013	0.02668
GXT_22780941	AK307304	GXL_227947	CCDC3	83643	NC_000010	chr10	-	12939957	13091907	1036	3	0.00161	0.0101	-1.29	down	6	6	5	17	6	13	0.00304	0.00391	0.00174	0.00814	0.00711	0.00625	0.0029	0.00089	0.00717	0.00077
GXT_22781034	AK292628	GXL_227906	CXCL12	6387	NC_000010	chr10	-	44873825	44880545	618	3	4.93e-80	1.83e-77	1.37	up	600	420	888	266	85	246	0.46652	0.4145	0.48664	0.19503	0.15898	0.18009	0.45589	0.0304	0.17803	0.01479
GXT_22781149	AK311381	GXL_161380	NOX4	50507	NC_000011	chr11	-	89133392	89223905	980	9	0.0107	0.049	1.91	up	10	4	6	1	1	2	0.00482	0.00206	0.00184	0.00051	0.00125	0.00102	0.00291	0.00136	0.00093	0.00031
GXT_22781204	AK313516	GXL_161263	CASP1	834	NC_000011	chr11	-	104896985	104905870	1245	9	0.000141	0.00121	-1.4	down	9	7	16	22	14	25	0.00379	0.00325	0.00406	0.00717	0.01085	0.008	0.0037	0.00034	0.00867	0.00158
GXT_22781237	AK313306	GXL_41671	LPXN	9404	NC_000011	chr11	-	58294927	58343323	1239	9	8.96e-09	1.6e-07	1.38	up	47	40	84	25	6	24	0.01778	0.01902	0.02129	0.00899	0.00595	0.00844	0.01936	0.00145	0.00779	0.00132
GXT_22781265	AK310490	GXL_161250	GDPD5	81544	NC_000011	chr11	-	75153809	75168832	1001	6	4.66e-09	8.57e-08	-1.27	down	28	17	33	59	27	61	0.01291	0.00877	0.01043	0.02546	0.03066	0.02812	0.0107	0.0017	0.02808	0.00212
GXT_22781282	AK312993	GXL_141229	CEND1	51286	NC_000011	chr11	-	788127	790123	626	2	0.00877	0.0417	-1.38	down	2	3	4	7	2	12	0.00168	0.00323	0.00231	0.00554	0.00392	0.00955	0.00241	0.00064	0.00634	0.00237
GXT_22781297	AK307163	GXL_1222905	SAA2	6289	NC_000011	chr11	-	18260770	18270181	1013	4	3.22e-14	9.5e-13	-2.11	down	9	6	15	34	22	36	0.00311	0.00266	0.00433	0.01103	0.0179	0.01171	0.00337	0.00071	0.01355	0.00309
GXT_22781300	AK310059	GXL_161263	CASP1	834	NC_000011	chr11	-	104897148	104905874	1392	6	0.00677	0.0338	-1.16	down	7	5	12	15	8	17	0.00264	0.00225	0.00274	0.00463	0.00571	0.00507	0.00254	0.00021	0.00514	0.00044
GXT_22781338	AK312182	GXL_1222905	SAA2	6289	NC_000011	chr11	-	18253049	18258334	468	4	2.19e-05	0.000231	#NAME?	down	0	0	0	8	3	3	0	0	0	0.00366	0.00352	0.00198	0	0	0.00305	0.00076
GXT_22781355	AK290122	GXL_161263	CASP1	834	NC_000011	chr11	-	104896936	104905874	1235	8	0.000269	0.00214	-1.4	down	9	6	15	21	13	23	0.00382	0.00308	0.00396	0.00725	0.01084	0.00741	0.00362	0.00039	0.0085	0.00166
GXT_22781391	AK292837	GXL_140993	TP53I11	9537	NC_000011	chr11	-	44956129	44972267	947	7	1.64e-85	6.78e-83	-1.32	down	601	498	807	1626	661	1517	0.29892	0.31939	0.27758	0.76101	0.77469	0.70486	0.29863	0.01707	0.74685	0.03021
GXT_22781433	AK291523	GXL_161200	ANGPTL5	253935	NC_000011	chr11	-	101761607	101778698	1628	8	1.37e-22	6.78e-21	-2.26	down	11	8	17	60	26	44	0.00338	0.00331	0.00333	0.01675	0.0181	0.01268	0.00334	3e-05	0.01584	0.0023
GXT_22781483	AK314254	GXL_139862	ABCD2	225	NC_000012	chr12	-	39947714	40013843	2649	10	0.0019	0.0116	#NAME?	down	0	0	0	3	4	1	0	0	0	0.00056	0.00139	0.00019	0	0	0.00071	0.0005
GXT_22781494	AK308896	GXL_139840	LMO3	55885	NC_000012	chr12	-	16703902	16762758	983	6	0.00075	0.00523	-2.02	down	0	3	4	11	4	8	0	0.00206	0.00147	0.00454	0.005	0.00405	0.00118	0.00087	0.00453	0.00039
GXT_22781502	AK308826	GXL_139840	LMO3	55885	NC_000012	chr12	-	16704060	16761024	889	6	0.00327	0.0184	-2.12	down	0	2	4	9	4	6	0	0.00152	0.00163	0.0039	0.00552	0.00336	0.00105	0.00074	0.00426	0.00092
GXT_22781522	AK308594	GXL_139840	LMO3	55885	NC_000012	chr12	-	16703744	16759940	1489	7	0.000165	0.00139	-2.23	down	0	3	4	13	5	8	0	0.00136	0.00097	0.00366	0.00412	0.00268	0.00078	0.00057	0.00349	0.0006
GXT_22781584	AK310827	GXL_193848	KRT5	3852	NC_000012	chr12	-	52909912	52914178	2046	7	0.00554	0.0286	-2.32	down	2	1	2	3	6	7	0.00051	0.00033	0.00035	0.00073	0.0036	0.0017	0.0004	8e-05	0.00201	0.00119
GXT_22781592	AK307832	GXL_139903	A2M	2	NC_000012	chr12	-	9220371	9268456	4324	35	8.01e-59	1.64e-56	-1.9	down	28	28	53	151	47	134	0.00298	0.00374	0.00409	0.01491	0.01221	0.01339	0.0036	0.00046	0.0135	0.00111
GXT_22781613	AK313112	GXL_193932	TSPAN8	7103	NC_000012	chr12	-	71519114	71551620	876	8	0.000163	0.00138	-1.47	down	13	5	4	18	12	18	0.00719	0.00308	0.00165	0.00906	0.01402	0.00853	0.00397	0.00235	0.01054	0.00247
GXT_22781665	AK312482	GXL_139903	A2M	2	NC_000012	chr12	-	9220419	9268459	4439	36	2.42e-57	4.74e-55	-1.88	down	30	29	54	155	48	135	0.00307	0.0038	0.00407	0.01497	0.01217	0.01318	0.00365	0.00042	0.01344	0.00116
GXT_22781674	AK312418	GXL_139840	LMO3	55885	NC_000012	chr12	-	16704156	16759421	868	4	6.19e-05	0.000584	-2.49	down	0	2	4	16	4	6	0	0.00155	0.00167	0.008	0.00566	0.00344	0.00107	0.00076	0.0057	0.00186
GXT_22781726	AK292762	GXL_193749	RND1	27289	NC_000012	chr12	-	49251449	49259653	1132	5	0.0104	0.0478	-2.58	down	1	0	2	3	2	7	0.00046	0	0.00043	0.00088	0.00217	0.0022	0.0003	0.00021	0.00175	0.00062
GXT_22781804	AK308925	GXL_1224273	DCLK1	9201	NC_000013	chr13	-	36348706	36429842	1000	9	0.00807	0.039	-1.17	down	7	3	4	17	3	8	0.0032	0.00202	0.00145	0.00651	0.00315	0.00398	0.00222	0.00073	0.00455	0.00143
GXT_22781848	AK310511	GXL_159147	FOXO1	2308	NC_000013	chr13	-	41116503	41185264	1508	3	3.32e-46	4.45e-44	-1.42	down	51	51	79	168	60	173	0.01774	0.0228	0.01893	0.05523	0.04848	0.05664	0.01982	0.00216	0.05345	0.00356
GXT_22781880	AK290345	GXL_159026	TMTC4	84899	NC_000013	chr13	-	101257030	101327049	2550	18	8.62e-06	9.92e-05	-1.01	down	29	17	56	65	26	62	0.00566	0.00423	0.00732	0.01141	0.01156	0.01082	0.00574	0.00126	0.01126	0.00032
GXT_22781892	AK292936	GXL_823834	FLT1	2321	NC_000013	chr13	-	28963568	29069265	2619	13	8.55e-14	2.44e-12	1.02	up	119	88	185	48	34	57	0.02212	0.02111	0.02353	0.00882	0.01359	0.01027	0.02225	0.00099	0.01089	0.002
GXT_22781904	AK291397	GXL_159088	KLF12	11278	NC_000013	chr13	-	74269536	74708394	1617	8	7.03e-18	2.65e-16	1.1	up	180	151	297	106	35	95	0.05646	0.06019	0.06253	0.02932	0.02506	0.02727	0.05973	0.0025	0.02722	0.00174
GXT_22781940	AK314153	GXL_691966	C14orf128	84837	NC_000014	chr14	-	32545184	32545847	664	1	0.000515	0.00377	-1.21	down	13	9	17	25	16	25	0.01027	0.00914	0.00925	0.01867	0.02958	0.01875	0.00955	0.00051	0.02233	0.00512
GXT_22781950	AK308732	GXL_156034	CDKL1	8814	NC_000014	chr14	-	50798645	50864122	2209	9	7.59e-05	0.000699	-1.04	down	15	15	38	46	18	42	0.00332	0.00459	0.00523	0.00853	0.00945	0.00834	0.00438	0.00079	0.00877	0.00048
GXT_22781953	AK315637	GXL_101109	SERPINA1	5265	NC_000014	chr14	-	94844786	94856982	1554	6	0.0106	0.0487	-1.33	down	1	3	4	7	1	11	0.00034	0.0013	0.0007	0.00223	0.00079	0.00353	0.00078	0.0004	0.00218	0.00112
GXT_22781981	AK313465	GXL_155959	SLC7A8	23428	NC_000014	chr14	-	23596386	23652123	1608	11	2.08e-41	2.4e-39	-1.52	down	75	37	99	201	87	167	0.02187	0.01426	0.02045	0.05643	0.05955	0.04629	0.01886	0.0033	0.05409	0.00566
GXT_22782005	AK307609	GXL_155959	SLC7A8	23428	NC_000014	chr14	-	23596364	23623593	1248	9	9.26e-25	5.07e-23	-1.62	down	65	25	77	161	80	132	0.02398	0.01297	0.01998	0.05897	0.07083	0.04747	0.01898	0.00455	0.05909	0.00954
GXT_22782023	AK315819	GXL_480134	TGM1	7051	NC_000014	chr14	-	24718322	24732416	2752	16	8.59e-07	1.19e-05	-1.2	down	24	12	23	39	17	54	0.00416	0.00294	0.00302	0.00631	0.00714	0.00905	0.00337	0.00056	0.0075	0.00115
GXT_22782087	AK291350	GXL_480134	TGM1	7051	NC_000014	chr14	-	24718322	24732383	2719	16	8.59e-07	1.19e-05	-1.2	down	24	12	23	39	17	54	0.00421	0.00298	0.00306	0.00638	0.00722	0.00916	0.00342	0.00056	0.00759	0.00116
GXT_22782122	AK315769	GXL_189865	CA12	771	NC_000015	chr15	-	63618484	63674075	1221	11	3.67e-39	3.84e-37	1.26	up	499	354	672	235	71	221	0.1897	0.16955	0.17251	0.08487	0.06536	0.07645	0.17725	0.00888	0.07556	0.00799
GXT_22782170	AK313352	GXL_189937	CILP	8483	NC_000015	chr15	-	65489069	65503811	3707	9	0.000752	0.00524	-1.19	down	9	6	13	19	7	26	0.00113	0.00109	0.00127	0.00254	0.00232	0.00349	0.00116	8e-05	0.00278	0.00051
GXT_22782225	AK309814	GXL_189797	RGMA	56963	NC_000015	chr15	-	93588186	93616892	1889	5	2.99e-06	3.78e-05	-1.26	down	16	12	27	29	18	54	0.00444	0.00428	0.00497	0.00761	0.0117	0.01397	0.00456	0.00029	0.01109	0.00263
GXT_22782285	AK291657	GXL_225488	PLCB2	5330	NC_000015	chr15	-	40580710	40600123	4016	32	6.2e-05	0.000585	-3.87	down	0	0	3	9	8	3	0	0	0.00027	0.00086	0.00183	0.00037	9e-05	0.00013	0.00102	0.00061
GXT_22782290	AK291365	GXL_189797	RGMA	56963	NC_000015	chr15	-	93588052	93632433	1443	3	9.33e-07	1.28e-05	-1.3	down	15	11	22	32	14	50	0.00545	0.00514	0.00537	0.011	0.01191	0.01691	0.00532	0.00013	0.01327	0.0026
GXT_22782301	AK290616	GXL_225538	ACTC1	70	NC_000015	chr15	-	35082493	35087750	1320	7	3.63e-72	1.07e-69	-1.49	down	303	240	459	885	395	921	0.11524	0.1165	0.1203	0.31224	0.35221	0.33165	0.11735	0.00215	0.33203	0.01632
GXT_22782326	AK308972	GXL_75847	RGS11	8786	NC_000016	chr16	-	321253	325868	1064	11	0.00561	0.0289	-3.27	down	0	0	2	5	2	4	0	0	0.00068	0.00186	0.00231	0.0014	0.00023	0.00032	0.00186	0.00037
GXT_22782446	AK312368	GXL_133460	NQO1	1728	NC_000016	chr16	-	69744879	69760459	942	6	6.41e-66	1.61e-63	-1.01	down	1889	1307	2694	3901	1579	3822	0.96492	0.87543	0.95115	1.89747	1.88201	1.86723	0.9305	0.03934	1.88224	0.01235
GXT_22782451	AK309513	GXL_133460	NQO1	1728	NC_000016	chr16	-	69744720	69760465	989	7	9.83e-75	3.12e-72	-1.01	down	1718	1206	2425	3519	1451	3488	0.83279	0.76825	0.8147	1.62693	1.64733	1.6215	0.80525	0.02718	1.63192	0.01112
GXT_22782482	AK292678	GXL_75931	LOC100507321	100507321	NC_000016	chr16	-	2710907	2713298	2392	1	5.44e-05	0.000521	-1.18	down	16	11	15	32	15	29	0.0035	0.0031	0.00227	0.00663	0.0077	0.00593	0.00296	0.00051	0.00675	0.00073
GXT_22782516	AK291063	GXL_133633	ZNF843	283933	NC_000016	chr16	-	31446885	31454106	1771	2	0.00968	0.0452	1.24	up	13	10	20	4	2	9	0.00385	0.00381	0.00408	0.00112	0.00139	0.00253	0.00391	0.00012	0.00168	0.00061
GXT_22782524	AK290613	GXL_133685	RRAD	6236	NC_000016	chr16	-	66955747	66959438	1301	5	0.00157	0.00986	1.1	up	24	24	32	12	5	14	0.00887	0.0114	0.00889	0.00457	0.00472	0.00498	0.00972	0.00119	0.00476	0.00017
GXT_22782541	AK309216	GXL_36039	BZRAP1	9256	NC_000017	chr17	-	56393383	56405503	2141	15	0.000115	0.00101	-1.14	down	23	17	13	27	27	33	0.00515	0.00441	0.00219	0.00536	0.01434	0.00618	0.00392	0.00126	0.00863	0.00405
GXT_22782568	AK314212	GXL_45914	SOCS3	9021	NC_000017	chr17	-	76354499	76356158	1094	2	7.32e-18	2.76e-16	1.02	up	197	159	273	97	41	111	0.09331	0.09677	0.08938	0.04348	0.04601	0.04962	0.09315	0.00302	0.04637	0.00252
GXT_22782585	AK313904	GXL_36005	TOB1	10140	NC_000017	chr17	-	48940341	48945339	1467	3	3.67e-90	1.75e-87	-1.13	down	650	481	881	1469	614	1379	0.23204	0.22033	0.21652	0.49471	0.51306	0.46723	0.22296	0.0066	0.49167	0.01883
GXT_22782664	AK313257	GXL_35992	DLX3	1747	NC_000017	chr17	-	48068881	48072588	1090	3	0.000268	0.00213	-1.72	down	6	4	6	18	10	11	0.00241	0.00247	0.00199	0.00819	0.01126	0.00503	0.00229	0.00021	0.00816	0.00254
GXT_22782677	AK315017	GXL_252273	CXCL16	58191	NC_000017	chr17	-	4637901	4643223	1354	5	2.55e-42	3.04e-40	-1.53	down	61	51	81	162	72	223	0.02131	0.0254	0.02054	0.05712	0.06166	0.07762	0.02242	0.00213	0.06547	0.00879
GXT_22782717	AK312980	GXL_45853	SECTM1	6398	NC_000017	chr17	-	80280037	80291640	864	5	1.36e-06	1.83e-05	-1.01	down	23	24	39	60	22	59	0.01336	0.01873	0.01589	0.03251	0.03126	0.03113	0.01599	0.00219	0.03163	0.00062
GXT_22782766	AK309756	GXL_45914	SOCS3	9021	NC_000017	chr17	-	76354355	76356158	1008	3	5.99e-13	1.6e-11	1.01	up	172	145	232	84	33	110	0.08826	0.09566	0.08231	0.04079	0.04019	0.05336	0.08874	0.00546	0.04478	0.00607
GXT_22782773	AK312348	GXL_36752	EVI2A	2123	NC_000017	chr17	-	29645321	29648720	929	2	0.00465	0.0247	1.21	up	8	3	19	3	3	1	0.00452	0.00218	0.00739	0.0016	0.00396	0.00054	0.0047	0.00213	0.00203	0.00143
GXT_22782782	AK312212	GXL_36932	CCL5	6352	NC_000017	chr17	-	34199381	34207364	331	3	0.00473	0.0251	2.18	up	7	8	12	3	0	3	0.01109	0.01426	0.01092	0.00449	0	0.00301	0.01209	0.00154	0.0025	0.00187
GXT_22782837	AK292716	GXL_252201	ATP2A3	489	NC_000017	chr17	-	3827676	3867758	3517	23	0.00537	0.0279	-1.72	down	2	2	2	8	2	8	0.0003	0.00038	0.00021	0.00113	0.0007	0.00106	0.0003	7e-05	0.00096	0.00019
GXT_22782857	AK292114	GXL_252273	CXCL16	58191	NC_000017	chr17	-	4637894	4643065	1203	5	3.84e-44	4.82e-42	-1.53	down	59	46	79	152	68	213	0.02311	0.02578	0.02252	0.06017	0.06532	0.08323	0.0238	0.00142	0.06957	0.00988
GXT_22782938	AK314860	GXL_71074	B4GALT6	9331	NC_000018	chr18	-	29205577	29264544	1304	9	0.000125	0.00108	-1.17	down	10	10	13	29	9	25	0.00322	0.00517	0.00332	0.01027	0.00659	0.00917	0.0039	0.0009	0.00868	0.00154
GXT_22783085	AK313538	GXL_3562	RAB3D	9545	NC_000019	chr19	-	11436074	11450344	921	5	4.24e-05	0.000416	-1.38	down	9	5	8	17	4	31	0.00456	0.00366	0.00314	0.00724	0.00533	0.01406	0.00379	0.00059	0.00888	0.00375
GXT_22783098	AK308137	GXL_3391	TLE2	7089	NC_000019	chr19	-	2997645	3047633	2482	20	7.16e-19	2.85e-17	-1.59	down	18	21	25	62	30	65	0.00317	0.00503	0.0032	0.01135	0.01318	0.01121	0.0038	0.00087	0.01191	0.0009
GXT_22783113	AK313256	GXL_744401	PSG9	5678	NC_000019	chr19	-	43757761	43773682	1380	6	0.0068	0.0339	Inf	up	1	4	4	0	0	0	0.00038	0.00147	0.00105	0	0	0	0.00097	0.00045	0	0
GXT_22783147	AK307437	GXL_189133	HSD17B14	51171	NC_000019	chr19	-	49316920	49339743	617	7	0.00233	0.0138	1.31	up	26	22	36	14	0	20	0.01956	0.02181	0.01817	0.00964	0	0.01372	0.01985	0.0015	0.00779	0.00575
GXT_22783194	AK312285	GXL_3391	TLE2	7089	NC_000019	chr19	-	2997846	3029011	2344	20	3.03e-19	1.23e-17	-1.63	down	16	21	23	56	29	67	0.00291	0.00518	0.00308	0.01057	0.01309	0.01201	0.00372	0.00103	0.01189	0.00103
GXT_22783404	AK314116	GXL_151336	B3GALT2	8707	NC_000001	chr1	-	193149424	193155461	1702	2	4.09e-105	2.7e-102	-1.33	down	204	172	292	554	225	564	0.06256	0.06694	0.06113	0.16047	0.16158	0.16473	0.06354	0.00247	0.16226	0.0018
GXT_22783481	AK313726	GXL_218269	PIK3R3	8503	NC_000001	chr1	-	46509345	46598708	1643	11	6.59e-06	7.77e-05	1.1	up	56	43	75	26	9	33	0.01648	0.01643	0.01407	0.00694	0.00598	0.0094	0.01566	0.00112	0.00744	0.00144
GXT_22783531	AK308153	GXL_825212	PIK3C2B	5287	NC_000001	chr1	-	204428303	204459552	2431	10	0.00579	0.0297	-1.94	down	1	2	2	4	3	9	0.00022	0.00055	0.0003	0.00082	0.00152	0.00184	0.00036	0.00014	0.00139	0.00043
GXT_22783777	AK309461	GXL_151122	NMNAT2	23057	NC_000001	chr1	-	183220826	183248417	1466	5	3.22e-06	4.04e-05	-1.02	down	19	26	15	51	20	36	0.0068	0.01058	0.00345	0.0159	0.01591	0.01202	0.00694	0.00291	0.01461	0.00183
GXT_22783887	AK292007	GXL_151181	FAIM3	9214	NC_000001	chr1	-	207078029	207095286	1595	8	6e-09	1.09e-07	-2.74	down	4	1	5	20	10	17	0.00132	0.00042	0.00113	0.00622	0.0077	0.00531	0.00096	0.00039	0.00641	0.00098
GXT_22783962	AK314440	GXL_122527	ACSS1	84532	NC_000020	chr20	-	24988398	25038741	2073	14	0.000101	0.000901	-1.1	down	11	10	7	25	6	26	0.00228	0.0026	0.00105	0.00526	0.00355	0.00553	0.00198	0.00067	0.00478	0.00088
GXT_22783996	AK311150	GXL_122630	SAMHD1	25939	NC_000020	chr20	-	35520227	35533811	1519	4	3.93e-135	4.34e-132	-2.02	down	301	217	464	1294	567	1194	0.09997	0.09425	0.10828	0.41076	0.44346	0.38212	0.10083	0.00576	0.41211	0.02506
GXT_22784010	AK315169	GXL_122630	SAMHD1	25939	NC_000020	chr20	-	35521335	35580179	2014	16	9.32e-143	1.18e-139	-2.04	down	352	227	546	1491	650	1360	0.07944	0.06662	0.08588	0.32267	0.34715	0.30075	0.07731	0.00801	0.32352	0.01895
GXT_22784065	AK290081	GXL_382658	RGS19	10287	NC_000020	chr20	-	62705160	62710862	984	6	6.3e-14	1.82e-12	-1.06	down	63	46	86	122	59	135	0.03065	0.02809	0.02931	0.05844	0.07067	0.06097	0.02935	0.00105	0.06336	0.00527
GXT_22784206	AK315310	GXL_249763	LIF	3976	NC_000022	chr22	-	30639640	30642788	713	3	3.98e-08	6.58e-07	1.23	up	45	45	72	21	12	19	0.03311	0.04066	0.03598	0.0146	0.02066	0.01257	0.03658	0.00311	0.01594	0.00344
GXT_22784247	AK312401	GXL_249853	GGT5	2687	NC_000022	chr22	-	24615938	24641047	2115	12	6.95e-148	9.33e-145	-1.67	down	337	289	452	1085	508	1120	0.07362	0.08093	0.06995	0.22404	0.26385	0.23343	0.07483	0.00456	0.24044	0.01699
GXT_22784283	AK292006	GXL_249853	GGT5	2687	NC_000022	chr22	-	24615623	24640892	2275	12	1.33e-119	1.12e-116	-1.7	down	386	336	516	1261	606	1304	0.07974	0.08917	0.07519	0.24663	0.29818	0.25729	0.08137	0.00582	0.26737	0.02222
GXT_22784325	AK309144	GXL_88985	MDH1B	130752	NC_000002	chr2	-	207610000	207630050	1444	9	0.00104	0.00692	-2.2	down	3	1	4	12	7	5	0.00109	0.00047	0.001	0.00369	0.00595	0.00172	0.00085	0.00027	0.00379	0.00173
GXT_22784326	AK309112	GXL_89150	PGAP1	80055	NC_000002	chr2	-	197705583	197738284	1625	12	6.59e-05	0.000617	-1.12	down	13	10	20	33	10	34	0.00387	0.0029	0.004	0.00915	0.00604	0.00828	0.00359	0.00049	0.00782	0.00131
GXT_22784363	AK308698	GXL_72352	FAM178B	51252	NC_000002	chr2	-	97541728	97615846	1456	11	0.00823	0.0396	-1.85	down	2	2	2	9	4	4	0.00072	0.00046	0.0005	0.00272	0.00337	0.00117	0.00056	0.00011	0.00242	0.00092
GXT_22784418	AK315338	GXL_482333	FZD5	7855	NC_000002	chr2	-	208631706	208633722	2017	1	4.14e-33	3.34e-31	-1.47	down	96	65	125	253	116	242	0.02497	0.02173	0.02213	0.06195	0.07028	0.05925	0.02294	0.00144	0.06383	0.00469
GXT_22784422	AK315312	GXL_241273	CHRNA1	1134	NC_000002	chr2	-	175612852	175629200	1452	9	0.00234	0.0138	Inf	up	6	3	2	0	0	0	0.00217	0.00139	0.0005	0	0	0	0.00135	0.00068	0	0
GXT_22784438	AK308257	GXL_88985	MDH1B	130752	NC_000002	chr2	-	207603053	207630052	1768	12	0.000571	0.00412	-2	down	5	1	4	16	7	5	0.00148	0.00038	0.00082	0.00393	0.00486	0.00141	0.00089	0.00045	0.0034	0.00146
GXT_22784551	AK312741	GXL_241219	FRZB	2487	NC_000002	chr2	-	183699576	183731377	1075	6	2.46e-97	1.37e-94	-1.81	down	195	168	312	740	345	749	0.08589	0.10098	0.09881	0.32101	0.36432	0.32371	0.09523	0.00666	0.33635	0.01981
GXT_22784605	AK290386	GXL_482333	FZD5	7855	NC_000002	chr2	-	208631667	208633597	1931	1	1.62e-34	1.38e-32	-1.46	down	92	62	115	240	109	228	0.02499	0.02165	0.02152	0.06162	0.0693	0.05877	0.02272	0.00161	0.06323	0.00445
GXT_22784630	AK293111	GXL_88986	HES6	55502	NC_000002	chr2	-	239147398	239148679	878	4	7.2e-05	0.000668	-1.11	down	19	17	40	39	29	47	0.00956	0.01306	0.01564	0.02201	0.03432	0.02609	0.01275	0.00249	0.02747	0.00512
GXT_22784639	AK292873	GXL_88982	SLC16A14	151473	NC_000002	chr2	-	230902042	230933447	1778	5	0.00842	0.0404	-1.91	down	2	1	3	7	3	7	0.00059	0.00038	0.00061	0.00195	0.00207	0.00168	0.00053	0.0001	0.0019	0.00016
GXT_22784647	AK292601	GXL_75843	PFN4	375189	NC_000002	chr2	-	24337679	24346347	1540	5	0.000776	0.00538	-2.4	down	3	0	2	7	3	10	0.00089	0	0.00047	0.00225	0.00212	0.00323	0.00045	0.00036	0.00253	0.0005
GXT_22784655	AK292386	GXL_88985	MDH1B	130752	NC_000002	chr2	-	207602981	207630010	1795	12	0.000611	0.00437	-2.08	down	5	1	3	15	7	5	0.00146	0.00038	0.0006	0.00359	0.00479	0.00139	0.00081	0.00047	0.00326	0.00141
GXT_22784656	AK292378	GXL_88985	MDH1B	130752	NC_000002	chr2	-	207603055	207630271	1985	12	0.000362	0.00277	-2.04	down	5	1	4	17	7	5	0.00132	0.00034	0.00073	0.00375	0.00433	0.00125	0.0008	0.0004	0.00311	0.00134
GXT_22784678	AK291696	GXL_75598	SLC8A1	6546	NC_000002	chr2	-	40342253	40739575	3065	8	1.67e-24	8.99e-23	1.05	up	342	297	548	194	73	191	0.0578	0.063	0.06265	0.03115	0.02844	0.03007	0.06115	0.00237	0.02989	0.00111
GXT_22784693	AK291338	GXL_241273	CHRNA1	1134	NC_000002	chr2	-	175612721	175629141	1524	9	0.00399	0.0217	Inf	up	5	3	2	0	0	0	0.00172	0.00133	0.00047	0	0	0	0.00117	0.00052	0	0
GXT_22784707	AK290856	GXL_75791	MATN3	4148	NC_000002	chr2	-	20192600	20212455	1798	8	5.39e-14	1.56e-12	-1.18	down	59	35	95	146	59	115	0.01634	0.01275	0.01829	0.03832	0.03824	0.03075	0.01579	0.00229	0.03577	0.00355
GXT_22784828	AK308095	GXL_13786	SGOL1	151648	NC_000003	chr3	-	20212683	20227713	1605	7	0.00453	0.0242	1.31	up	22	17	26	14	1	10	0.00654	0.00714	0.00563	0.00432	0.00076	0.00279	0.00644	0.00062	0.00262	0.00146
GXT_22784861	AK310571	GXL_171157	ADAMTS9	56999	NC_000003	chr3	-	64636561	64673676	1938	9	0.000114	0.001	-1.5	down	4	5	8	25	4	13	0.00081	0.00174	0.00112	0.00599	0.0019	0.00308	0.00122	0.00039	0.00366	0.00172
GXT_22784884	AK313018	GXL_13762	TIMP4	7079	NC_000003	chr3	-	12195015	12200412	747	5	3.93e-24	2.08e-22	-1.65	down	49	27	58	150	54	128	0.03229	0.02253	0.02467	0.09224	0.07986	0.07801	0.0265	0.00419	0.08337	0.00632
GXT_22784923	AK309734	GXL_13920	SLC4A7	9497	NC_000003	chr3	-	27465132	27525911	1572	7	2.06e-15	6.63e-14	1.32	up	87	63	131	30	16	41	0.0239	0.02305	0.02545	0.00883	0.01172	0.01161	0.02413	0.00099	0.01072	0.00134
GXT_22784937	AK309567	GXL_171119	MST1	4485	NC_000003	chr3	-	49723455	49726136	1350	8	0.000882	0.00601	-1.57	down	4	4	8	16	7	13	0.00117	0.002	0.00214	0.00551	0.00544	0.0048	0.00177	0.00043	0.00525	0.00032
GXT_22784961	AK290140	GXL_925864	CPOX/CLDND1	-2	NC_000003	chr3	-	98299215	98312455	1783	7	2.56e-33	2.09e-31	-1.17	down	96	73	148	246	86	241	0.02696	0.02718	0.02778	0.06544	0.05556	0.06521	0.02731	0.00035	0.06207	0.0046
GXT_22785036	AK291056	GXL_181851	TNIK	23043	NC_000003	chr3	-	170781119	171178197	4727	31	0.00192	0.0117	1.84	up	12	15	18	8	0	5	0.00133	0.002	0.00125	0.00063	0	0.00053	0.00153	0.00034	0.00039	0.00028
GXT_22785037	AK291041	GXL_925893	KPNA4	3840	NC_000003	chr3	-	160219422	160283328	2294	17	4.59e-34	3.82e-32	-1.01	down	320	241	492	676	272	729	0.06507	0.06249	0.06876	0.12938	0.12685	0.13917	0.06544	0.00257	0.1318	0.00531
GXT_22785060	AK309261	GXL_779589	PPARGC1A	10891	NC_000004	chr4	-	23815946	23891658	1442	9	0.00781	0.038	#NAME?	down	0	0	0	0	0	6	0	0	0	0	0	0.00173	0	0	0.00058	0.00082
GXT_22785067	AK311712	GXL_1232825	ADH1B	125	NC_000004	chr4	-	100240973	100242558	1187	2	7.29e-16	2.42e-14	-3.07	down	5	2	6	29	14	41	0.00221	0.00114	0.00183	0.01211	0.01448	0.0172	0.00173	0.00044	0.0146	0.00208
GXT_22785111	AK310895	GXL_125215	SLC2A9	56606	NC_000004	chr4	-	9881830	10041834	1659	12	0.00332	0.0186	-1.04	down	11	10	12	18	12	23	0.00336	0.00349	0.00227	0.00448	0.00888	0.0063	0.00304	0.00055	0.00655	0.00181
GXT_22785143	AK307532	GXL_220995	ARSJ	79642	NC_000004	chr4	-	114823508	114900803	2253	4	1.35e-149	1.9e-146	1.42	up	1954	1576	2953	766	309	866	0.44895	0.46424	0.46791	0.16556	0.1673	0.18911	0.46037	0.00821	0.17399	0.01072
GXT_22785174	AK309988	GXL_221001	ENSG00000178636	0	NC_000004	chr4	-	120114528	120133799	1005	4	0.00476	0.0252	-4.16	down	0	0	1	6	2	2	0	0	0.00036	0.00296	0.00244	0.00099	0.00012	0.00017	0.00213	0.00083
GXT_22785191	AK309597	GXL_925987	ADH1A	124	NC_000004	chr4	-	100202972	100212160	1403	6	8.1e-05	0.000741	-3.95	down	0	0	2	5	3	10	0	0	0.00052	0.00177	0.00175	0.0032	0.00017	0.00025	0.00224	0.00068
GXT_22785265	AK291459	GXL_220848	RASGEF1B	153020	NC_000004	chr4	-	82348887	82393030	1567	14	0.00747	0.0366	2.49	up	5	4	4	0	1	0	0.00167	0.00172	0.00092	0	0.00078	0	0.00144	0.00037	0.00026	0.00037
GXT_22785277	AK290835	GXL_220834	ADH4	127	NC_000004	chr4	-	100045512	100065448	1299	9	0.00782	0.038	#NAME?	down	0	0	0	1	0	5	0	0	0	0.00038	0	0.00192	0	0	0.00077	0.00083
GXT_22785338	AK308539	GXL_103354	GLRA1	2741	NC_000005	chr5	-	151229252	151304393	1802	8	9.38e-12	2.27e-10	-1.57	down	15	15	37	65	33	42	0.00437	0.00561	0.00742	0.01788	0.02248	0.01147	0.0058	0.00125	0.01728	0.00452
GXT_22785359	AK308329	GXL_744803	SOX30	11063	NC_000005	chr5	-	157053186	157079376	2714	5	0.00101	0.00676	-1.53	down	2	3	8	19	2	11	0.00039	0.00075	0.001	0.00347	0.0009	0.00202	0.00071	0.00025	0.00213	0.00105
GXT_22785385	AK315143	GXL_103131	SEMA6A	57556	NC_000005	chr5	-	115782309	115872154	3292	19	0.00212	0.0127	1.01	up	25	11	39	11	4	14	0.00351	0.00205	0.00375	0.00151	0.00149	0.00197	0.0031	0.00075	0.00166	0.00022
GXT_22785392	AK313277	GXL_103359	CD14	929	NC_000005	chr5	-	140011441	140012760	1232	2	1.12e-08	1.97e-07	-1.08	down	35	19	54	80	25	75	0.01447	0.0104	0.01583	0.03179	0.02491	0.02992	0.01357	0.00231	0.02887	0.0029
GXT_22785410	AK313202	GXL_103170	HBEGF	1839	NC_000005	chr5	-	139714261	139726188	902	5	6.09e-13	1.63e-11	1.69	up	45	52	80	16	9	17	0.02501	0.03588	0.02788	0.00882	0.01225	0.00939	0.02959	0.0046	0.01015	0.0015
GXT_22785441	AK307310	GXL_103170	HBEGF	1839	NC_000005	chr5	-	139713532	139726188	974	5	7.79e-09	1.4e-07	1.24	up	56	55	107	33	10	33	0.02962	0.03669	0.03784	0.01682	0.01261	0.01687	0.03472	0.00363	0.01543	0.002
GXT_22785466	AK309932	GXL_483103	SH3TC2	79628	NC_000005	chr5	-	148384114	148411179	3077	8	1.25e-06	1.69e-05	-1.91	down	4	3	14	24	8	26	0.00068	0.00066	0.00158	0.00371	0.00319	0.00421	0.00097	0.00043	0.0037	0.00042
GXT_22785495	AK312181	GXL_103252	NME5	8382	NC_000005	chr5	-	137451370	137475079	664	6	2.29e-07	3.46e-06	-1.28	down	18	17	32	46	25	53	0.01343	0.01219	0.01415	0.0279	0.03698	0.03415	0.01326	0.00081	0.03301	0.00379
GXT_22785505	AK290030	GXL_159271	CCNO	10309	NC_000005	chr5	-	54528644	54529486	843	1	0.00208	0.0125	-2.1	down	2	1	3	6	3	11	0.00124	0.0008	0.00129	0.00353	0.00437	0.0061	0.00111	0.00022	0.00467	0.00107
GXT_22785522	AK289403	GXL_103288	C5orf46	389336	NC_000005	chr5	-	147269579	147286101	519	4	2.9e-32	2.25e-30	1.32	up	235	161	311	90	45	79	0.21785	0.19857	0.20499	0.08251	0.10409	0.07191	0.20714	0.00802	0.08617	0.01339
GXT_22785529	AK292841	GXL_103234	CCDC69	26112	NC_000005	chr5	-	150562595	150603653	1416	9	4.95e-30	3.54e-28	-1.18	down	122	86	161	272	113	278	0.04225	0.03696	0.03602	0.08712	0.09021	0.08886	0.03841	0.00274	0.08873	0.00126
GXT_22785554	AK291064	GXL_103276	CTNNA1/LRRTM2	-2	NC_000005	chr5	-	138208404	138211028	2274	2	0.000435	0.00324	1.83	up	9	9	18	2	2	3	0.00208	0.00267	0.00286	0.00044	0.00108	0.00066	0.00254	0.00033	0.00073	0.00027
GXT_22785604	AK314162	GXL_43516	IER3	8870	NC_000006	chr6	-	30711713	30712327	503	2	1.31e-51	2.17e-49	1.43	up	313	309	510	138	57	142	0.3212	0.40611	0.35838	0.13506	0.13913	0.13665	0.3619	0.03475	0.13695	0.00167
GXT_22785623	AK315789	GXL_40039	SLC17A5	26503	NC_000006	chr6	-	74304800	74363695	1574	11	3.04e-116	2.43e-113	-1.98	down	161	141	228	703	299	664	0.0505	0.05055	0.0489	0.19707	0.20793	0.18989	0.04998	0.00077	0.1983	0.00742
GXT_22785673	AK315325	GXL_40185	HTR1B	3351	NC_000006	chr6	-	78171948	78173490	1543	1	0.00187	0.0114	#NAME?	down	0	0	0	3	2	3	0	0	0	0.00096	0.00159	0.00097	0	0	0.00117	0.00029
GXT_22785696	AK307986	GXL_39988	CYP39A1	51302	NC_000006	chr6	-	46517858	46620230	1391	11	0.00149	0.00945	-1.17	down	9	7	15	29	10	14	0.00315	0.00291	0.00326	0.0082	0.00706	0.0043	0.00311	0.00015	0.00652	0.00164
GXT_22785804	AK309680	GXL_190749	CNKSR3	154043	NC_000006	chr6	-	154727244	154799625	2023	13	9.76e-27	5.93e-25	-1.07	down	129	116	239	325	134	337	0.03164	0.036	0.03902	0.07279	0.07404	0.07598	0.03555	0.00303	0.07427	0.00131
GXT_22785838	AK290080	GXL_40185	HTR1B	3351	NC_000006	chr6	-	78171470	78173490	2021	1	0.00042	0.00315	#NAME?	down	0	0	0	5	2	3	0	0	0	0.00123	0.00121	0.00074	0	0	0.00106	0.00023
GXT_22785892	AK292263	GXL_39988	CYP39A1	51302	NC_000006	chr6	-	46517738	46620499	1955	12	2.58e-05	0.000268	-1.28	down	13	9	19	39	14	24	0.00322	0.00276	0.00296	0.00837	0.00754	0.0056	0.00298	0.00019	0.00717	0.00116
GXT_22785984	AK308685	GXL_97864	MAGI2	9863	NC_000007	chr7	-	77814822	78119318	1510	9	0.000475	0.00351	-1.01	down	15	11	27	28	14	40	0.00521	0.00491	0.00646	0.00854	0.01005	0.01253	0.00553	0.00067	0.01037	0.00164
GXT_22786017	AK313694	GXL_97727	HGF	3082	NC_000007	chr7	-	81331897	81399364	2249	18	3.35e-39	3.52e-37	2.84	up	69	60	79	11	4	9	0.01423	0.01573	0.01125	0.00232	0.00218	0.00177	0.01374	0.00186	0.00209	0.00023
GXT_22786037	AK310921	GXL_97742	FGL2	10875	NC_000007	chr7	-	76828177	76829165	989	1	1.32e-24	7.16e-23	-1.47	down	47	41	71	162	50	153	0.02434	0.02797	0.02593	0.08053	0.06077	0.07569	0.02608	0.00149	0.07233	0.00841
GXT_22786074	AK307644	GXL_97719	STEAP4	79689	NC_000007	chr7	-	87910352	87936206	1129	4	1.64e-124	1.54e-121	-4.42	down	15	3	20	247	107	226	0.00697	0.00179	0.00609	0.1039	0.11206	0.09441	0.00495	0.00226	0.10346	0.00721
GXT_22786113	AK312672	GXL_97742	FGL2	10875	NC_000007	chr7	-	76825596	76829122	1332	2	5.64e-66	1.42e-63	-1.56	down	109	71	153	341	109	351	0.04214	0.03595	0.04148	0.12581	0.09862	0.12939	0.03986	0.00278	0.11794	0.01374
GXT_22786124	AK312424	GXL_97699	PDK4	5166	NC_000007	chr7	-	95214953	95225828	1459	11	1.75e-16	6.07e-15	-2.45	down	5	3	9	22	7	48	0.0018	0.00139	0.00223	0.00714	0.00589	0.01366	0.00181	0.00034	0.0089	0.00341
GXT_22786130	AK309552	GXL_12429	FKBP14	55033	NC_000007	chr7	-	30053904	30066278	1085	3	1.46e-50	2.33e-48	-1.52	down	143	114	207	482	169	422	0.06791	0.06883	0.06732	0.20965	0.17989	0.18742	0.06802	0.00062	0.19232	0.01263
GXT_22786158	AK289954	GXL_97834	SEMA3A	10371	NC_000007	chr7	-	83590156	83824310	3255	17	0.00645	0.0325	1.29	up	15	11	21	6	2	8	0.00225	0.00186	0.00221	0.00091	0.00075	0.00122	0.00211	0.00018	0.00096	0.0002
GXT_22786198	AK291674	GXL_97727	HGF	3082	NC_000007	chr7	-	81331338	81399449	2908	18	4.42e-35	3.86e-33	2.77	up	76	73	90	14	5	10	0.01227	0.01484	0.01006	0.00222	0.00211	0.00154	0.01239	0.00195	0.00196	0.0003
GXT_22786246	AK308839	GXL_29825	HR	55806	NC_000008	chr8	-	21985599	21988194	1379	2	1.35e-12	3.51e-11	-3.46	down	2	3	0	19	14	16	0.00076	0.00147	0	0.00664	0.01246	0.00578	0.00074	0.0006	0.00829	0.00297
GXT_22786249	AK314017	GXL_172655	GEM	2669	NC_000008	chr8	-	95262538	95274547	1015	5	3.63e-38	3.66e-36	1.57	up	172	123	284	73	25	54	0.08373	0.07406	0.09503	0.03338	0.02903	0.02553	0.08427	0.00857	0.02931	0.00321
GXT_22786301	AK310792	GXL_172547	MTSS1	9788	NC_000008	chr8	-	125565131	125575668	1643	6	8.34e-33	6.65e-31	-1.08	down	105	82	144	244	95	217	0.03307	0.03296	0.03048	0.07123	0.06917	0.06421	0.03217	0.0012	0.0682	0.00295
GXT_22786321	AK314820	GXL_29907	DUSP4	1846	NC_000008	chr8	-	29194543	29208192	1582	4	4.11e-26	2.42e-24	-1.7	down	28	33	55	124	57	110	0.00928	0.01382	0.01256	0.03873	0.04424	0.034	0.01189	0.00191	0.03899	0.00418
GXT_22786358	AK312589	GXL_29994	STC1	6781	NC_000008	chr8	-	23702283	23712319	1027	4	9.66e-210	3.81e-206	-2.39	down	66	57	88	371	127	433	0.03167	0.03611	0.02884	0.16733	0.14568	0.19399	0.03221	0.00299	0.169	0.01976
GXT_22786373	AK309366	GXL_29994	STC1	6781	NC_000008	chr8	-	23701427	23711821	1745	4	4.53e-160	8.76e-157	-2.55	down	78	63	110	481	173	556	0.02236	0.02389	0.02198	0.13112	0.11866	0.15175	0.02274	0.00083	0.13384	0.01365
GXT_22786375	AK290469	GXL_172608	SYBU	55638	NC_000008	chr8	-	110586981	110693234	2498	8	1.81e-05	0.000195	-1.1	down	25	16	26	38	24	48	0.00504	0.00405	0.00376	0.00734	0.01181	0.00937	0.00428	0.00055	0.00951	0.00183
GXT_22786402	AK293090	GXL_29754	SFRP1	6422	NC_000008	chr8	-	41122289	41166988	1472	4	1.55e-08	2.69e-07	-1.02	down	47	37	68	86	51	95	0.01603	0.01512	0.01571	0.02863	0.04003	0.03148	0.01562	0.00038	0.03338	0.00484
GXT_22786405	AK292970	GXL_172592	C8orf84	157869	NC_000008	chr8	-	73979313	74005407	1163	5	0.00405	0.022	-1.88	down	2	3	3	6	7	8	0.0009	0.00116	0.00093	0.00256	0.00739	0.00299	0.001	0.00012	0.00431	0.00218
GXT_22786561	AK310014	GXL_695440	KIF24	347240	NC_000009	chr9	-	34211974	34329235	2027	12	0.00279	0.016	1.94	up	9	14	10	2	1	5	0.00207	0.00366	0.0015	0.00049	0.00061	0.00123	0.00241	0.00091	0.00078	0.00032
GXT_22786658	AK314631	GXL_219418	RAI2	10742	NC_000023	chrX	-	17818538	17879420	1820	2	0.00566	0.0291	-1.21	down	7	3	6	12	4	15	0.00202	0.00113	0.00119	0.00327	0.0027	0.0041	0.00145	0.00041	0.00336	0.00057
GXT_22786679	AK308871	GXL_384630	MED14	9282	NC_000023	chrX	-	40568652	40595136	1181	10	1.67e-10	3.6e-09	-1.12	down	49	26	80	103	43	108	0.02043	0.01335	0.0208	0.03756	0.04054	0.04003	0.01819	0.00343	0.03938	0.0013
GXT_22786717	AK308140	GXL_219429	SCML2	10389	NC_000023	chrX	-	18259448	18306982	1306	8	0.00387	0.0212	1.02	up	23	15	25	6	5	13	0.00884	0.00702	0.00578	0.00228	0.00434	0.0044	0.00721	0.00126	0.00367	0.00099
GXT_22786783	AK312679	GXL_219669	MAOB	4129	NC_000023	chrX	-	43626713	43741696	1714	15	7.23e-10	1.46e-08	-1.76	down	9	11	16	43	20	31	0.00275	0.00393	0.00316	0.01041	0.01218	0.00756	0.00328	0.00049	0.01005	0.0019
GXT_22786784	AK312605	GXL_89509	GPC4	2239	NC_000023	chrX	-	132436895	132549462	2140	9	6.8e-92	3.34e-89	-1.1	down	596	490	925	1378	595	1410	0.13555	0.14431	0.14334	0.29911	0.31154	0.30013	0.14107	0.00392	0.30359	0.00563
GXT_22786791	AK312409	GXL_89719	MMGT1	93380	NC_000023	chrX	-	135047183	135056147	709	4	2.29e-15	7.35e-14	-1.17	down	45	33	51	112	35	96	0.03108	0.02853	0.02191	0.06995	0.05541	0.06041	0.02717	0.00386	0.06192	0.00603
GXT_22786796	AK312270	GXL_89699	CHRDL1	91851	NC_000023	chrX	-	109919459	110039047	1484	12	2.36e-29	1.63e-27	-1.58	down	23	28	49	97	38	105	0.00778	0.01135	0.01119	0.02907	0.02864	0.0341	0.01011	0.00165	0.0306	0.00248
GXT_22786806	AK309439	GXL_219526	GPR64	10149	NC_000023	chrX	-	19008392	19017254	1018	3	1.21e-05	0.000135	-1.93	down	2	5	6	22	7	12	0.00103	0.00331	0.002	0.00974	0.00789	0.00569	0.00211	0.00093	0.00777	0.00166
GXT_22786828	AK289754	GXL_1239890	ARHGAP4	393	NC_000023	chrX	-	153127921	153141316	3996	28	0.00476	0.0252	-3.36	down	0	1	0	4	3	3	0	7e-05	0	0.0005	0.00061	0.00025	2e-05	3e-05	0.00045	0.00015
GXT_22786832	AK293106	GXL_89699	CHRDL1	91851	NC_000023	chrX	-	109919023	110039033	1909	12	4.14e-25	2.32e-23	-1.66	down	29	33	60	134	45	136	0.00769	0.01059	0.01078	0.03221	0.02637	0.03444	0.00969	0.00141	0.03101	0.0034
GXT_22786834	AK293070	GXL_384630	MED14	9282	NC_000023	chrX	-	40510860	40594982	4881	31	6.85e-40	7.39e-38	-1.05	down	233	174	362	501	205	547	0.02289	0.02196	0.02369	0.0455	0.04653	0.0498	0.02285	0.00071	0.04728	0.00183
GXT_22786871	AK291012	GXL_219526	GPR64	10149	NC_000023	chrX	-	19008829	19140599	3284	29	4.72e-24	2.49e-22	-2.48	down	11	9	13	67	25	59	0.0016	0.00185	0.00132	0.00927	0.00748	0.00804	0.00159	0.00022	0.00826	0.00075
GXT_22786873	AK290958	GXL_89705	BEX1	55859	NC_000023	chrX	-	102317799	102319102	578	3	0.000782	0.00542	1.28	up	19	18	33	14	3	7	0.01634	0.01983	0.01979	0.01205	0.00425	0.00603	0.01865	0.00164	0.00744	0.00334
GXT_22786919	AK290558	GXL_925987	ADH1A	124	NC_000004	chr4	-	100197524	100212142	1456	9	4.65e-05	0.000453	-4.71	down	0	0	1	5	2	9	0	0	0.00025	0.0017	0.00084	0.00274	8e-05	0.00012	0.00176	0.00078
GXT_22786924	AK290584	GXL_926281	INHBA	3624	NC_000007	chr7	-	41729234	41742669	1505	3	1.13e-49	1.76e-47	1.21	up	924	714	1334	419	166	444	0.31605	0.31709	0.31667	0.13603	0.1346	0.14288	0.3166	0.00043	0.13784	0.00361
GXT_22786962	AK312031	GXL_691335	C10orf116/AGAP11	-2	NC_000010	chr10	+	88728239	88730339	294	3	1.22e-48	1.84e-46	-1.52	down	170	107	233	463	223	414	0.27653	0.22257	0.25179	0.69631	0.84763	0.63186	0.2503	0.02205	0.72527	0.09044
GXT_22787061	AK307851	GXL_924810	MBL1P	8512	NC_000010	chr10	+	81664662	81667610	540	3	0.00338	0.0189	-1.88	down	3	1	2	14	2	3	0.00291	0.00125	0.00134	0.01192	0.00455	0.00277	0.00183	0.00076	0.00641	0.00396
GXT_22787062	AK307800	GXL_90449	CACNB2	783	NC_000010	chr10	+	18550009	18823105	1066	10	0.0086	0.041	-2.91	down	0	1	0	8	1	0	0	0.00063	0	0.00326	0.00115	0	0.00021	0.0003	0.00147	0.00135
GXT_22787088	AK307526	GXL_90449	CACNB2	783	NC_000010	chr10	+	18429742	18828598	2097	14	0.00163	0.0102	-1.98	down	6	1	1	11	7	5	0.0015	0.00032	0.00017	0.00236	0.00293	0.00119	0.00066	0.00059	0.00216	0.00072
GXT_22787113	AK310178	GXL_134226	PPAPDC1A	196051	NC_000010	chr10	+	122216815	122341296	1506	7	1.44e-27	9.1e-26	2.04	up	104	75	143	22	10	31	0.03115	0.03182	0.0314	0.00611	0.00734	0.00915	0.03146	0.00028	0.00753	0.00125
GXT_22787232	AK314589	GXL_479736	NCAM1	4684	NC_000011	chr11	+	112831997	113146109	2993	20	0.000719	0.00504	-1.24	down	6	7	17	24	9	21	0.00088	0.00135	0.00181	0.00364	0.00328	0.00334	0.00135	0.00038	0.00342	0.00016
GXT_22787278	AK311529	GXL_39057	P2RY6	5031	NC_000011	chr11	+	72983393	72984266	874	1	0.00873	0.0415	-3.67	down	1	0	0	3	3	3	0.0006	0	0	0.00125	0.00335	0.00171	0.0002	0.00028	0.0021	0.0009
GXT_22787287	AK308673	GXL_174117	ABCG4	64137	NC_000011	chr11	+	119024816	119031081	1488	10	0.000196	0.00162	#NAME?	down	0	0	0	2	1	8	0	0	0	0.00033	0.00083	0.00167	0	0	0.00094	0.00055
GXT_22787294	AK313942	GXL_39015	P2RY2	5029	NC_000011	chr11	+	72929607	72946338	1428	3	0.00136	0.00871	-1.08	down	13	8	14	22	11	25	0.00425	0.00378	0.00354	0.00764	0.00946	0.00858	0.00386	0.00029	0.00856	0.00074
GXT_22787324	AK311158	GXL_39008	PLEKHB1	58473	NC_000011	chr11	+	73358734	73373054	963	8	0.00318	0.0179	-2.23	down	2	0	5	10	4	7	0.00109	0	0.00188	0.00515	0.0051	0.00362	0.00099	0.00077	0.00462	0.00071
GXT_22787335	AK315300	GXL_1223647	SDHD	6392	NC_000011	chr11	+	112046216	112088597	1849	12	6.4e-05	0.000601	-2.43	down	4	0	2	12	3	11	0.00085	0	0.00039	0.00268	0.00199	0.00296	0.00041	0.00035	0.00254	0.00041
GXT_22787412	AK314748	GXL_39008	PLEKHB1	58473	NC_000011	chr11	+	73357626	73372647	760	8	0.00042	0.00315	#NAME?	down	0	0	0	6	2	2	0	0	0	0.00391	0.00323	0.00131	0	0	0.00282	0.0011
GXT_22787416	AK310418	GXL_38881	KIAA1377	57562	NC_000011	chr11	+	101815106	101832500	1528	5	0.000291	0.00229	-1.6	down	5	3	8	17	5	17	0.00172	0.00132	0.00166	0.00518	0.00402	0.00522	0.00157	0.00018	0.00481	0.00056
GXT_22787441	AK310103	GXL_38912	RELT	84957	NC_000011	chr11	+	73101948	73106737	1530	9	6.82e-09	1.23e-07	1.17	up	73	41	102	32	12	31	0.02275	0.01719	0.02179	0.00961	0.00883	0.00944	0.02058	0.00243	0.00929	0.00033
GXT_22787477	AK309789	GXL_38887	SNX32	254122	NC_000011	chr11	+	65601430	65618925	1346	5	0.00235	0.0139	-1.72	down	7	1	1	6	5	13	0.00234	0.0005	0.00027	0.00221	0.00365	0.00482	0.00104	0.00093	0.00356	0.00107
GXT_22787512	AK290172	GXL_123167	TRIM34	53840	NC_000011	chr11	+	5617865	5632601	1845	8	1.74e-08	3e-07	1.67	up	39	28	63	19	3	13	0.0108	0.00987	0.01214	0.00484	0.002	0.00351	0.01094	0.00093	0.00345	0.00116
GXT_22787515	AK290109	GXL_39008	PLEKHB1	58473	NC_000011	chr11	+	73359735	73372726	1010	6	0.000179	0.00149	-4.55	down	0	0	1	9	2	3	0	0	0.00036	0.00442	0.00243	0.00148	0.00012	0.00017	0.00278	0.00123
GXT_22787518	AK290035	GXL_174117	ABCG4	64137	NC_000011	chr11	+	119019813	119031848	2246	15	0.0104	0.048	-2.24	down	0	1	2	3	1	8	0	0.0003	0.00032	0.00044	0.00055	0.00111	0.00021	0.00015	0.0007	0.00029
GXT_22787522	AK289909	GXL_39008	PLEKHB1	58473	NC_000011	chr11	+	73358716	73373015	1045	7	0.000814	0.00561	-2.5	down	1	0	5	12	3	7	0.0005	0	0.00173	0.00569	0.00352	0.00334	0.00074	0.00073	0.00418	0.00107
GXT_22787523	AK289830	GXL_174117	ABCG4	64137	NC_000011	chr11	+	119020299	119032145	2382	15	0.000181	0.00151	-4.41	down	0	0	1	3	1	10	0	0	0.00015	0.00042	0.00052	0.00146	5e-05	7e-05	0.0008	0.00047
GXT_22787532	AK289620	GXL_39008	PLEKHB1	58473	NC_000011	chr11	+	73358682	73372929	993	7	0.000805	0.00556	-2.54	down	1	0	4	11	2	7	0.00053	0	0.00146	0.00549	0.00247	0.00351	0.00066	0.0006	0.00382	0.00125
GXT_22787558	AK292453	GXL_479736	NCAM1	4684	NC_000011	chr11	+	112832333	113146285	2755	19	0.0023	0.0136	-1.13	down	7	7	18	26	9	18	0.00114	0.00147	0.0021	0.00432	0.00357	0.00307	0.00157	0.0004	0.00365	0.00051
GXT_22787587	AK291780	GXL_123201	SPON1	10418	NC_000011	chr11	+	13984236	14287448	2854	16	9.46e-28	6.04e-26	-1.7	down	30	21	56	110	46	106	0.00533	0.00496	0.00658	0.01736	0.01893	0.0171	0.00562	0.00069	0.0178	0.00081
GXT_22787665	AK314040	GXL_779200	IRAK3	11213	NC_000012	chr12	+	66582996	66641951	1875	12	6.3e-06	7.46e-05	-1.21	down	20	13	21	40	19	39	0.00504	0.00432	0.00366	0.00899	0.01243	0.00877	0.00434	0.00056	0.01006	0.00168
GXT_22787695	AK311371	GXL_66317	LOC100049716	100049716	NC_000012	chr12	+	752202	753359	1158	1	6.41e-11	1.44e-09	-1.24	down	32	21	63	70	34	104	0.01451	0.01198	0.01954	0.02939	0.03605	0.043	0.01534	0.00314	0.03615	0.00556
GXT_22787703	AK308505	GXL_380839	EMP1	2012	NC_000012	chr12	+	13349660	13367806	1436	3	4.89e-154	8.22e-151	-1.29	down	1793	1488	2729	4714	2016	4842	0.61249	0.63145	0.63342	1.49965	1.58255	1.53534	0.62579	0.00944	1.53918	0.03395
GXT_22787759	AK315133	GXL_141590	LGR5	8549	NC_000012	chr12	+	71833575	71978514	3012	18	2.19e-09	4.18e-08	-1.39	down	22	16	32	62	27	52	0.00366	0.00313	0.00384	0.00922	0.00897	0.00777	0.00354	0.0003	0.00865	0.00063
GXT_22787770	AK310798	GXL_380839	EMP1	2012	NC_000012	chr12	+	13349657	13368215	1039	3	8.34e-80	3.08e-77	-1.25	down	3186	2661	5022	8390	3465	8613	1.57506	1.66333	1.70003	3.89943	3.9814	4.01258	1.64614	0.05245	3.96447	0.04772
GXT_22787833	AK307071	GXL_59476	METTL7A	25840	NC_000012	chr12	+	51318794	51324257	940	3	6.16e-31	4.55e-29	-1.09	down	120	89	163	262	120	228	0.06697	0.06228	0.06262	0.13822	0.15676	0.11992	0.06396	0.00214	0.1383	0.01504
GXT_22787872	AK312246	GXL_380839	EMP1	2012	NC_000012	chr12	+	13349728	13367625	595	5	7.32e-142	8.89e-139	-1.3	down	1855	1542	2848	4931	2087	5137	1.50533	1.54898	1.5662	3.71416	3.86883	3.8471	1.54017	0.02562	3.81003	0.06837
GXT_22787902	AK289784	GXL_59485	PTPRO	5800	NC_000012	chr12	+	15475446	15749686	4545	27	7.48e-10	1.5e-08	-1.6	down	12	11	15	49	15	32	0.00127	0.00134	0.00119	0.0048	0.00378	0.00318	0.00127	6e-05	0.00392	0.00067
GXT_22787972	AK291003	GXL_103602	OAS1	4938	NC_000012	chr12	+	113344778	113355677	1277	5	1.43e-05	0.000157	-1.22	down	16	15	34	52	26	30	0.00657	0.00792	0.00893	0.01941	0.02305	0.01075	0.00781	0.00097	0.01774	0.00516
GXT_22787973	AK290982	GXL_59485	PTPRO	5800	NC_000012	chr12	+	15699555	15749158	1502	14	6.08e-06	7.23e-05	-1.72	down	5	6	6	25	7	17	0.0014	0.0018	0.00144	0.0066	0.0049	0.00464	0.00155	0.00018	0.00538	0.00087
GXT_22788008	AK311177	GXL_40647	WDFY2	115825	NC_000013	chr13	+	52158598	52329577	913	7	8.28e-22	3.95e-20	1.53	up	147	117	175	55	12	70	0.07091	0.07343	0.06093	0.02476	0.01479	0.03274	0.06842	0.0054	0.0241	0.00734
GXT_22788018	AK315139	GXL_744196	RAP2A	5911	NC_000013	chr13	+	98086423	98116696	598	3	1.9e-11	4.49e-10	-1.2	down	29	30	53	90	32	86	0.02456	0.0327	0.03202	0.07296	0.0657	0.0708	0.02976	0.00369	0.06982	0.00304
GXT_22788047	AK309815	GXL_40647	WDFY2	115825	NC_000013	chr13	+	52158631	52325801	1274	8	3.54e-20	1.51e-18	1.48	up	165	142	207	67	17	79	0.05626	0.06369	0.05147	0.0221	0.01608	0.02658	0.05714	0.00503	0.02159	0.0043
GXT_22788055	AK289845	GXL_40655	WASF3	10810	NC_000013	chr13	+	27131840	27260221	1973	10	4.54e-61	1e-58	-1.15	down	356	270	561	887	352	812	0.0892	0.08593	0.09496	0.20735	0.20193	0.19216	0.09003	0.00373	0.20048	0.00629
GXT_22788102	AK313989	GXL_247869	ANG/RNASE4	-2	NC_000014	chr14	+	21152750	21162167	630	2	3.61e-22	1.75e-20	-1.26	down	77	55	82	193	62	174	0.0605	0.05636	0.04552	0.14653	0.11392	0.13097	0.05413	0.00632	0.13047	0.01332
GXT_22788198	AK315848	GXL_247708	GALNTL1	57452	NC_000014	chr14	+	69726918	69819292	2174	15	0.00067	0.00474	1.1	up	30	23	40	17	5	14	0.00603	0.00682	0.00515	0.00365	0.00169	0.00275	0.006	0.00068	0.0027	0.0008
GXT_22788217	AK309528	GXL_172956	BDKRB1	623	NC_000014	chr14	+	96722547	96735304	1526	5	2.91e-40	3.2e-38	1.69	up	150	156	237	56	19	67	0.05088	0.0685	0.05502	0.01787	0.01529	0.02154	0.05813	0.00752	0.01823	0.00256
GXT_22788235	AK289745	GXL_247708	GALNTL1	57452	NC_000014	chr14	+	69726923	69819388	2265	15	0.000766	0.00532	1.1	up	32	23	40	17	5	15	0.00625	0.00655	0.00495	0.0035	0.00163	0.00286	0.00592	0.00069	0.00266	0.00078
GXT_22788248	AK292724	GXL_1224781	COCH	1690	NC_000014	chr14	+	31343765	31359128	1840	12	0.0101	0.0467	-2.86	down	1	0	1	0	2	8	0.00029	0	0.0002	0	0.00133	0.00189	0.00016	0.00012	0.00107	0.00079
GXT_22788257	AK291970	GXL_172956	BDKRB1	623	NC_000014	chr14	+	96722547	96731098	1299	3	5.57e-33	4.45e-31	1.72	up	199	196	312	74	22	87	0.07956	0.10122	0.08562	0.02786	0.02079	0.03297	0.0888	0.00912	0.02721	0.00499
GXT_22788265	AK291326	GXL_172846	FOS	2353	NC_000014	chr14	+	75745531	75748216	1387	4	5.35e-52	8.98e-50	-1.47	down	130	126	216	424	187	413	0.04801	0.0608	0.05522	0.14907	0.16114	0.14565	0.05468	0.00524	0.15195	0.00664
GXT_22788272	AK290907	GXL_172846	FOS	2353	NC_000014	chr14	+	75746346	75748387	1496	3	2.97e-54	5.21e-52	-1.47	down	124	115	199	403	170	386	0.04304	0.05155	0.04734	0.13228	0.13687	0.12681	0.04731	0.00347	0.13199	0.00411
GXT_22788288	AK311660	GXL_692138	AK311660	0	NC_000015	chr15	+	28834638	28836269	1023	2	0.000149	0.00127	2	up	19	2	21	5	1	2	0.00515	0.00066	0.00384	0.00133	0.00076	0.00049	0.00322	0.00189	0.00086	0.00035
GXT_22788320	AK308440	GXL_230287	IL16	3603	NC_000015	chr15	+	81475088	81572020	885	6	0.00137	0.00876	-1.74	down	4	1	13	14	9	14	0.00237	0.00076	0.0049	0.00616	0.01025	0.00788	0.00268	0.0017	0.0081	0.00168
GXT_22788353	AK313160	GXL_5109	FGF7	2252	NC_000015	chr15	+	49715457	49776701	1032	4	2.31e-116	1.85e-113	-1.12	down	2442	1720	3483	5479	2140	5582	1.21264	1.10313	1.19758	2.57795	2.49842	2.64183	1.17112	0.04847	2.57273	0.05866
GXT_22788429	AK290372	GXL_4966	DUOX1	53905	NC_000015	chr15	+	45422131	45457233	5159	36	0.00528	0.0275	-1.02	down	8	8	16	23	9	18	0.00081	0.00078	0.00112	0.00196	0.0019	0.00145	0.0009	0.00015	0.00177	0.00023
GXT_22788512	AK314300	GXL_89858	CCDC113	29070	NC_000016	chr16	+	58283851	58313681	1202	9	0.000568	0.00411	-1.07	down	12	10	20	26	12	31	0.00525	0.00561	0.00571	0.00907	0.01226	0.01243	0.00552	0.0002	0.01125	0.00155
GXT_22788519	AK309038	GXL_779272	SHISA9	729993	NC_000016	chr16	+	12996136	13003418	1432	2	0.00129	0.00832	-2.25	down	4	0	1	10	3	6	0.00147	0	0.00025	0.00312	0.00257	0.00209	0.00057	0.00064	0.00259	0.00042
GXT_22788575	AK311156	GXL_98576	GPR56	9289	NC_000016	chr16	+	57673404	57698615	1772	4	0.0108	0.0493	2.01	up	7	4	7	2	1	0	0.00207	0.00152	0.00143	0.00056	0.00069	0	0.00167	0.00028	0.00042	0.0003
GXT_22788658	AK307158	GXL_316701	IL32	9235	NC_000016	chr16	+	3115356	3117835	930	2	0.000367	0.0028	4.21	up	11	2	6	1	0	0	0.00368	0.00143	0.00192	0.00053	0	0	0.00234	0.00097	0.00018	0.00025
GXT_22788662	AK310053	GXL_316701	IL32	9235	NC_000016	chr16	+	3115640	3118666	1381	3	0.000811	0.00559	Inf	up	7	2	5	0	0	0	0.00132	0.00097	0.00103	0	0	0	0.00111	0.00015	0	0
GXT_22788679	AK312405	GXL_98576	GPR56	9289	NC_000016	chr16	+	57662302	57697494	2512	14	0.000221	0.00179	4.34	up	5	6	9	0	0	1	0.00084	0.00134	0.00129	0	0	0.0002	0.00116	0.00022	7e-05	9e-05
GXT_22788797	AK314081	GXL_8816	KCNJ2	3759	NC_000017	chr17	+	68164814	68172464	1685	2	5.11e-06	6.16e-05	1.34	up	42	32	47	15	6	19	0.01308	0.01241	0.00993	0.00441	0.00437	0.00562	0.01181	0.00135	0.0048	0.00058
GXT_22788809	AK315735	GXL_102571	DHRS11	79154	NC_000017	chr17	+	34948304	34956632	919	7	0.000837	0.00575	1.08	up	23	17	37	14	5	9	0.01142	0.01027	0.01219	0.007	0.00455	0.00434	0.01129	0.00079	0.0053	0.00121
GXT_22789030	AK292885	GXL_45772	MYOCD	93649	NC_000017	chr17	+	12569338	12667275	3443	14	2.09e-10	4.45e-09	1.97	up	50	28	45	5	4	17	0.00746	0.0047	0.00456	0.00072	0.00143	0.00236	0.00557	0.00134	0.0015	0.00067
GXT_22789035	AK292779	GXL_45947	ALOX15B	247	NC_000017	chr17	+	7942362	7952040	2300	14	4.46e-20	1.89e-18	-2.23	down	11	9	24	74	24	62	0.00251	0.00235	0.00361	0.01544	0.01203	0.01299	0.00282	0.00056	0.01349	0.00144
GXT_22789084	AK290747	GXL_8726	MAP2K6	5608	NC_000017	chr17	+	67410826	67538153	1564	12	6.18e-05	0.000583	-2.17	down	3	2	4	13	6	12	0.00101	0.00086	0.00092	0.0038	0.00471	0.00382	0.00093	6e-05	0.00411	0.00042
GXT_22789093	AK311943	GXL_744374	PMAIP1	5366	NC_000018	chr18	+	57567228	57569985	347	2	0.000235	0.0019	1.69	up	19	14	21	8	2	4	0.02714	0.0272	0.02082	0.00857	0.00354	0.00431	0.02505	0.00299	0.00547	0.00221
GXT_22789165	AK290054	GXL_47287	GNAL	2774	NC_000018	chr18	+	11751562	11881409	1667	13	0.00825	0.0397	-3.1	down	1	0	0	5	0	4	0.00031	0	0	0.00149	0	0.0009	0.0001	0.00015	0.0008	0.00061
GXT_22789184	AK292422	GXL_47181	SLC14A2	8170	NC_000018	chr18	+	42792960	43262940	3540	21	0.00146	0.00929	-1.83	down	2	4	3	11	7	7	0.0003	0.00076	0.0002	0.00126	0.00208	0.00098	0.00042	0.00024	0.00144	0.00047
GXT_22789188	AK291726	GXL_70893	MYL12B	103910	NC_000018	chr18	+	3262131	3278142	846	4	1.97e-68	5.27e-66	1.07	up	7331	5048	9540	3352	1402	3553	4.40873	3.89499	3.96178	1.90585	1.96932	2.0211	4.0885	0.22807	1.96542	0.04713
GXT_22789264	AK313994	GXL_262160	GPR77	27202	NC_000019	chr19	+	47835404	47845070	1232	2	2.27e-121	1.99e-118	-1.62	down	159	129	216	527	193	551	0.06685	0.07003	0.06247	0.20675	0.18832	0.2191	0.06645	0.0031	0.20472	0.01265
GXT_22789383	AK314680	GXL_382179	HIF3A	64344	NC_000019	chr19	+	46806856	46842879	2073	15	7.08e-07	9.94e-06	-3.42	down	1	1	2	11	8	11	0.00025	0.00033	0.00035	0.00215	0.00415	0.0024	0.00031	4e-05	0.0029	0.00089
GXT_22789384	AK314657	GXL_262453	ARRDC2	27106	NC_000019	chr19	+	18118981	18123775	1363	8	2.77e-52	4.67e-50	-1.14	down	426	364	601	1014	443	971	0.14662	0.16134	0.14662	0.33273	0.36108	0.31997	0.15153	0.00694	0.33793	0.01718
GXT_22789414	AK312636	GXL_262526	ICAM1	3383	NC_000019	chr19	+	10381796	10395963	1639	7	5.02e-77	1.71e-74	-1.48	down	91	74	141	285	117	271	0.02721	0.02921	0.02953	0.08043	0.07973	0.0775	0.02865	0.00103	0.07922	0.00125
GXT_22789522	AK291530	GXL_262480	GDF15	9518	NC_000019	chr19	+	18496968	18499986	1200	2	1.12e-25	6.45e-24	1.95	up	95	89	169	42	8	28	0.04067	0.04885	0.04991	0.01735	0.00818	0.01162	0.04648	0.00413	0.01238	0.00378
GXT_22789585	AK309106	GXL_58994	PADI1	29943	NC_000001	chr1	+	17566190	17571558	1143	2	4.43e-07	6.41e-06	1.57	up	24	24	34	4	7	7	0.01102	0.01414	0.01075	0.00174	0.00752	0.00305	0.01197	0.00154	0.0041	0.00247
GXT_22789620	AK308915	GXL_925488	DARC/CADM3	-2	NC_000001	chr1	+	159141405	159163571	994	5	2.41e-50	3.84e-48	-1.73	down	36	39	64	155	57	167	0.01884	0.0251	0.02181	0.06888	0.05822	0.07671	0.02192	0.00256	0.06794	0.00758
GXT_22789625	AK314197	GXL_120859	SOX13	9580	NC_000001	chr1	+	204042750	204095262	1974	14	8.72e-08	1.39e-06	-1.03	down	34	21	54	86	25	65	0.00877	0.00664	0.00886	0.01859	0.01308	0.01448	0.00809	0.00103	0.01538	0.00234
GXT_22789648	AK315802	GXL_120826	SWT1	54823	NC_000001	chr1	+	185126325	185259935	2834	19	1.37e-05	0.000151	-1.07	down	18	23	26	48	25	38	0.00288	0.005	0.003	0.00759	0.0091	0.00562	0.00363	0.00097	0.00744	0.00142
GXT_22789681	AK308637	GXL_57765	TRIM46	80128	NC_000001	chr1	+	155147075	155148927	1109	2	5.26e-08	8.58e-07	-1.32	down	25	10	18	43	17	48	0.01056	0.00605	0.00586	0.01886	0.01882	0.02107	0.00749	0.00217	0.01958	0.00105
GXT_22789704	AK313668	GXL_1227706	RGS2	5997	NC_000001	chr1	+	192778171	192780726	667	5	5.66e-07	8.06e-06	-1.2	down	20	13	29	57	16	42	0.01494	0.01314	0.01571	0.03789	0.02761	0.03029	0.0146	0.00108	0.03193	0.00435
GXT_22789736	AK315360	GXL_228233	PHGDH	26227	NC_000001	chr1	+	120254498	120286663	1750	12	3.81e-29	2.59e-27	1.38	up	255	201	358	107	37	113	0.07014	0.0682	0.06586	0.0272	0.02317	0.02846	0.06807	0.00175	0.02628	0.00226
GXT_22789758	AK311017	GXL_120836	RASAL2	9462	NC_000001	chr1	+	178062865	178389818	1500	5	1.97e-13	5.48e-12	-1	down	58	55	80	140	61	103	0.01885	0.02361	0.01822	0.04205	0.04801	0.03277	0.02023	0.00241	0.04094	0.00627
GXT_22789783	AK308075	GXL_57765	TRIM46	80128	NC_000001	chr1	+	155147070	155154619	1865	9	6.89e-15	2.13e-13	-1.23	down	50	27	67	108	42	114	0.01252	0.00904	0.01261	0.02712	0.02665	0.02799	0.01139	0.00166	0.02725	0.00056
GXT_22789797	AK307878	GXL_228130	TCTEX1D1	200132	NC_000001	chr1	+	67218181	67243547	915	4	4.72e-26	2.77e-24	1.55	up	103	64	150	28	13	45	0.05457	0.04453	0.05584	0.01482	0.01656	0.02395	0.05165	0.00506	0.01844	0.00396
GXT_22789844	AK307715	GXL_46989	CYP4B1	1580	NC_000001	chr1	+	47264723	47281083	1375	8	0.000407	0.00306	#NAME?	down	0	0	0	6	1	3	0	0	0	0.00216	0.00089	0.00109	0	0	0.00138	0.00056
GXT_22789862	AK313197	GXL_120988	FMO3	2328	NC_000001	chr1	+	171060046	171086582	1682	9	2.12e-09	4.05e-08	-1.49	down	14	12	33	60	20	46	0.00405	0.00481	0.00687	0.01621	0.01389	0.01273	0.00524	0.00119	0.01428	0.00145
GXT_22789863	AK313170	GXL_46989	CYP4B1	1580	NC_000001	chr1	+	47264718	47284486	1575	12	5.21e-06	6.27e-05	#NAME?	down	0	0	0	8	2	6	0	0	0	0.0022	0.00156	0.0019	0	0	0.00189	0.00026
GXT_22789868	AK313106	GXL_779437	TGFB2	7042	NC_000001	chr1	+	218519939	218614704	1350	7	2.61e-26	1.55e-24	-1.08	down	124	124	238	346	123	356	0.04157	0.05442	0.05886	0.11632	0.09545	0.12163	0.05162	0.00733	0.11113	0.0113
GXT_22789911	AK310429	GXL_57765	TRIM46	80128	NC_000001	chr1	+	155145421	155154422	2129	12	1.1e-14	3.35e-13	-1.13	down	56	26	65	102	39	114	0.01197	0.0076	0.01052	0.02238	0.0206	0.02407	0.01003	0.00182	0.02235	0.00142
GXT_22789919	AK310292	GXL_228350	CDC14A	8556	NC_000001	chr1	+	100810594	100963745	1542	14	0.00491	0.0259	-1.35	down	6	6	17	10	15	22	0.0017	0.00262	0.00306	0.00257	0.00717	0.00549	0.00246	0.00057	0.00508	0.0019
GXT_22789947	AK312877	GXL_120887	FMO2	2327	NC_000001	chr1	+	171154441	171178092	1480	9	0.00231	0.0137	-2.41	down	0	1	3	11	2	3	0	0.00046	0.00073	0.00268	0.00166	0.00067	0.0004	0.0003	0.00167	0.00082
GXT_22789958	AK310132	GXL_228233	PHGDH	26227	NC_000001	chr1	+	120254559	120277604	1036	7	5.88e-24	3.09e-22	1.47	up	109	100	172	44	19	46	0.05179	0.05677	0.05261	0.01886	0.01974	0.01896	0.05372	0.00218	0.01919	0.00039
GXT_22789972	AK307100	GXL_228130	TCTEX1D1	200132	NC_000001	chr1	+	67218178	67243384	1010	7	1.06e-25	6.11e-24	1.65	up	103	70	157	31	13	39	0.04853	0.04308	0.05153	0.01473	0.01459	0.01874	0.04771	0.0035	0.01602	0.00192
GXT_22790005	AK312696	GXL_925447	WNT2B	7482	NC_000001	chr1	+	113051618	113063131	1443	5	5.35e-06	6.43e-05	1.15	up	47	45	66	27	9	23	0.016	0.01821	0.01554	0.00859	0.00768	0.00794	0.01658	0.00117	0.00807	0.00038
GXT_22790035	AK309699	GXL_57765	TRIM46	80128	NC_000001	chr1	+	155147230	155156726	2361	10	6.16e-22	2.96e-20	-1.21	down	67	37	96	141	64	145	0.01366	0.01	0.0144	0.02835	0.03197	0.02865	0.01269	0.00192	0.02966	0.00164
GXT_22790047	AK312250	GXL_57646	RGS4	5999	NC_000001	chr1	+	163039152	163044350	741	5	1.16e-152	1.87e-149	1.88	up	2624	1885	3978	813	287	726	1.63194	1.52022	1.71867	0.4664	0.41753	0.4299	1.62361	0.08123	0.43794	0.02075
GXT_22790048	AK309662	GXL_228233	PHGDH	26227	NC_000001	chr1	+	120254559	120286836	2196	14	7.04e-31	5.2e-29	1.39	up	266	210	378	111	38	120	0.05852	0.05711	0.05578	0.02258	0.01902	0.02427	0.05714	0.00112	0.02196	0.00219
GXT_22790056	AK309521	GXL_925488	DARC/CADM3	-2	NC_000001	chr1	+	159174788	159176039	1252	1	5.32e-07	7.6e-06	-2.12	down	5	4	10	20	15	22	0.0019	0.00215	0.00289	0.00792	0.01471	0.00875	0.00231	0.00042	0.01046	0.00302
GXT_22790097	AK290208	GXL_925421	LEPR	3953	NC_000001	chr1	+	65886370	66099207	3196	20	1.9e-73	5.79e-71	-1.11	down	3825	2708	5824	9033	3409	8511	0.5705	0.52108	0.59992	1.28584	1.20061	1.21593	0.56383	0.03253	1.23413	0.0371
GXT_22790121	AK289971	GXL_19273	RHOU	58480	NC_000001	chr1	+	228871239	228880077	1618	3	3.1e-06	3.9e-05	-2.2	down	5	2	5	16	8	18	0.00162	0.00083	0.00112	0.0049	0.00531	0.00554	0.00119	0.00033	0.00525	0.00026
GXT_22790141	AK289541	GXL_925488	DARC/CADM3	-2	NC_000001	chr1	+	159141377	159170867	1633	10	4.25e-60	9.01e-58	-1.89	down	94	70	170	391	169	383	0.02921	0.02808	0.03407	0.10687	0.11045	0.1063	0.03045	0.0026	0.10787	0.00184
GXT_22790165	AK292883	GXL_121008	PFKFB2	5208	NC_000001	chr1	+	207226595	207252534	1720	15	0.00155	0.00975	-1.15	down	7	8	21	21	11	27	0.00166	0.00274	0.00378	0.00519	0.00571	0.00695	0.00273	0.00087	0.00595	0.00074
GXT_22790227	AK291593	GXL_925488	DARC/CADM3	-2	NC_000001	chr1	+	159173803	159176288	2006	2	3.37e-20	1.44e-18	-2.42	down	12	6	22	68	29	59	0.00276	0.00202	0.00396	0.01681	0.01775	0.01465	0.00291	0.0008	0.0164	0.0013
GXT_22790237	AK291443	GXL_120826	SWT1	54823	NC_000001	chr1	+	185126425	185260202	3001	19	7.95e-06	9.22e-05	-1.01	down	20	28	26	52	26	43	0.00307	0.00584	0.00288	0.00783	0.009	0.00614	0.00393	0.00135	0.00766	0.00117
GXT_22790243	AK291369	GXL_228134	LPPR4	9890	NC_000001	chr1	+	99730048	99772760	2444	7	2.01e-05	0.000214	-1.55	down	11	5	5	23	9	20	0.00215	0.0011	0.00074	0.00467	0.00452	0.00408	0.00133	0.0006	0.00442	0.00025
GXT_22790251	AK291185	GXL_59145	GPR3	2827	NC_000001	chr1	+	27719161	27721587	1371	2	0.00322	0.0181	1.44	up	16	12	17	5	2	7	0.00612	0.0059	0.00448	0.00181	0.00179	0.00254	0.0055	0.00073	0.00205	0.00035
GXT_22790368	AK313222	GXL_779452	DOK5	55816	NC_000020	chr20	+	53092299	53267018	1108	8	3.31e-19	1.34e-17	1.12	up	202	139	290	79	44	98	0.08521	0.07607	0.08673	0.03177	0.04604	0.04046	0.08267	0.00471	0.03942	0.00587
GXT_22790371	AK313060	GXL_825307	REM1	28954	NC_000020	chr20	+	30063091	30072233	1195	5	2.99e-06	3.76e-05	-2.32	down	3	2	2	17	2	15	0.00132	0.00113	0.0006	0.00705	0.00205	0.00584	0.00102	0.0003	0.00498	0.00213
GXT_22790413	AK312276	GXL_128390	PRNP	5621	NC_000020	chr20	+	4667105	4680628	822	2	5.28e-67	1.36e-64	-1.32	down	330	225	428	828	303	862	0.20605	0.17776	0.1821	0.48951	0.43056	0.51041	0.18864	0.01244	0.47683	0.03381
GXT_22790486	AK308060	GXL_925620	MX2	4600	NC_000021	chr21	+	42733954	42767625	1083	7	0.00582	0.0298	-1.09	down	7	5	18	28	7	13	0.00339	0.00311	0.00534	0.0119	0.0068	0.00598	0.00395	0.00099	0.00823	0.00262
GXT_22790499	AK312708	GXL_693482	JAM2	58494	NC_000021	chr21	+	27011824	27086984	1207	10	1.32e-25	7.58e-24	-1.05	down	152	124	239	411	131	317	0.06087	0.06153	0.06706	0.15824	0.12879	0.12282	0.06315	0.00278	0.13662	0.01548
GXT_22790506	AK289663	GXL_163482	CLIC6	54102	NC_000021	chr21	+	36041462	36088786	2293	6	4.26e-05	0.000419	-2.63	down	2	2	0	9	5	9	0.00023	0.00059	0	0.00195	0.00268	0.00174	0.00027	0.00024	0.00212	0.0004
GXT_22790512	AK292812	GXL_176086	KCNJ15	3772	NC_000021	chr21	+	39628991	39672466	1516	3	5.49e-11	1.25e-09	1.34	up	58	58	100	30	10	30	0.02007	0.02581	0.02373	0.00981	0.0081	0.00933	0.0232	0.00237	0.00908	0.00072
GXT_22790603	AK310398	GXL_664276	ADRBK2	157	NC_000022	chr22	+	25960995	26106104	1581	16	0.00133	0.00858	1.67	up	13	9	16	3	2	4	0.00365	0.00341	0.00286	0.00094	0.00155	0.00095	0.00331	0.00033	0.00115	0.00029
GXT_22790644	AK292234	GXL_664276	ADRBK2	157	NC_000022	chr22	+	25960995	26118539	2202	21	1.05e-06	1.43e-05	1.76	up	23	22	35	5	4	9	0.005	0.00612	0.00443	0.00113	0.00223	0.00158	0.00518	0.0007	0.00165	0.00045
GXT_22790674	AK314459	GXL_57928	PLEKHA3	65977	NC_000002	chr2	+	179345195	179368614	1305	8	6.72e-15	2.08e-13	-1.2	down	45	33	62	114	34	120	0.01608	0.01447	0.0155	0.03897	0.03011	0.04007	0.01535	0.00067	0.03638	0.00446
GXT_22790706	AK309025	GXL_119639	SLC4A3	6508	NC_000002	chr2	+	220492352	220493726	860	3	0.00372	0.0205	-1.82	down	3	1	5	10	4	9	0.00184	0.00078	0.0021	0.00556	0.00571	0.00463	0.00157	0.00057	0.0053	0.00048
GXT_22790716	AK314124	GXL_57948	ACVR2A	92	NC_000002	chr2	+	148602372	148684843	1892	11	1.57e-13	4.4e-12	-1.04	down	65	46	91	135	51	149	0.0154	0.01496	0.01642	0.03118	0.0318	0.03499	0.01559	0.00061	0.03266	0.00167
GXT_22790719	AK314083	GXL_119639	SLC4A3	6508	NC_000002	chr2	+	220492349	220506450	3936	23	9.17e-09	1.63e-07	-1.01	down	40	31	38	79	31	73	0.0048	0.00445	0.0034	0.00917	0.00841	0.00835	0.00422	0.00059	0.00864	0.00037
GXT_22790753	AK313967	GXL_693852	IL18R1/IL1RL1	-2	NC_000002	chr2	+	102927989	103013346	1749	11	0.0101	0.0467	-2.87	down	1	0	1	6	2	2	0.0003	0	0.00021	0.00142	0.0014	0.00057	0.00017	0.00013	0.00113	0.0004
GXT_22790783	AK315442	GXL_925811	EFHD1	80303	NC_000002	chr2	+	233498267	233546429	868	4	1.41e-16	4.91e-15	-1.65	down	26	20	43	73	39	102	0.01511	0.01398	0.01665	0.03884	0.05092	0.05532	0.01525	0.00109	0.04836	0.00697
GXT_22790858	AK310782	GXL_1230895	CYP27A1	1593	NC_000002	chr2	+	219646899	219678814	1208	3	1.91e-10	4.09e-09	-1.04	down	45	36	58	98	42	87	0.01792	0.01842	0.01629	0.03685	0.03922	0.03335	0.01754	0.00091	0.03647	0.00241
GXT_22790866	AK307777	GXL_57963	ITGA6	3655	NC_000002	chr2	+	173354294	173369438	1148	6	1.55e-27	9.82e-26	-1.21	down	112	98	207	310	123	322	0.04993	0.05578	0.06134	0.12398	0.12447	0.13311	0.05568	0.00466	0.12719	0.00419
GXT_22790896	AK310565	GXL_925811	EFHD1	80303	NC_000002	chr2	+	233470767	233547050	1156	4	6.4e-50	1.01e-47	-1.97	down	38	28	72	158	79	162	0.01679	0.01517	0.02176	0.06562	0.08072	0.06739	0.01791	0.0028	0.07124	0.00674
GXT_22790931	AK312950	GXL_1229475	GRHL1	29841	NC_000002	chr2	+	10091822	10140835	1998	16	0.00695	0.0345	1.57	up	5	3	11	0	2	1	0.00105	0.00067	0.00163	0	0.00123	0.00025	0.00112	0.00039	0.00049	0.00053
GXT_22790989	AK312083	GXL_925789	PARD3B	117583	NC_000002	chr2	+	206481246	206481757	512	1	4.07e-09	7.53e-08	-1.34	down	22	16	39	66	28	52	0.02254	0.02107	0.02755	0.06405	0.06725	0.05063	0.02372	0.00277	0.06064	0.0072
GXT_22791078	AK292340	GXL_119649	INHA	3623	NC_000002	chr2	+	220437012	220440309	1247	2	0.00973	0.0454	-1.23	down	10	7	3	8	13	13	0.00421	0.00379	0.00087	0.00318	0.0128	0.00519	0.00296	0.00149	0.00706	0.00414
GXT_22791082	AK292149	GXL_42138	VIT	5212	NC_000002	chr2	+	36923936	36986500	997	6	2.05e-11	4.84e-10	-1.18	down	35	20	38	65	22	90	0.01684	0.01257	0.01231	0.02714	0.0234	0.03999	0.01391	0.00208	0.03018	0.00711
GXT_22791101	AK291659	GXL_119712	CXCR7	57007	NC_000002	chr2	+	237478468	237490462	1480	2	3.73e-31	2.78e-29	-1.23	down	107	84	169	232	137	257	0.03779	0.03829	0.04101	0.07717	0.11278	0.08535	0.03903	0.00141	0.09177	0.01523
GXT_22791148	AK312023	GXL_232555	ST6GAL1	6480	NC_000003	chr3	+	186769091	186793591	560	4	4.56e-15	1.43e-13	-2.78	down	9	0	11	43	17	35	0.00843	0	0.00516	0.03276	0.03289	0.02755	0.00453	0.00347	0.03107	0.00249
GXT_22791239	AK315308	GXL_119194	CLSTN2	64084	NC_000003	chr3	+	139654027	140285095	3058	17	0.00551	0.0284	-1.56	down	1	2	9	16	3	7	0.0001	0.00044	0.00095	0.00227	0.0012	0.00098	0.0005	0.00035	0.00148	0.00056
GXT_22791278	AK313322	GXL_169754	ENTPD3	956	NC_000003	chr3	+	40428751	40468999	1734	11	1.66e-11	3.93e-10	2.82	up	34	24	35	4	1	7	0.00847	0.00739	0.00646	0.00086	0.00071	0.00201	0.00744	0.00082	0.00119	0.00058
GXT_22791329	AK307284	GXL_193597	SLC6A6	6533	NC_000003	chr3	+	14444121	14485850	996	3	9.48e-05	0.000851	-1.03	down	21	14	41	57	22	35	0.01062	0.00889	0.01342	0.02706	0.02605	0.01767	0.01098	0.00187	0.02359	0.00421
GXT_22791332	AK312923	GXL_232579	CLDN11	5010	NC_000003	chr3	+	170136656	170150544	823	3	2.97e-05	0.000303	1.96	up	19	11	21	7	2	1	0.01211	0.00819	0.00922	0.00361	0.00298	0.00061	0.00984	0.00166	0.0024	0.00129
GXT_22791345	AK309981	GXL_664299	ITPR1	3708	NC_000003	chr3	+	4836684	4888027	1652	10	1.55e-19	6.39e-18	-1.13	down	82	52	140	181	78	199	0.02477	0.01918	0.02765	0.04934	0.055	0.05262	0.02387	0.00352	0.05232	0.00232
GXT_22791360	AK312563	GXL_119097	CD200	4345	NC_000003	chr3	+	112051915	112068666	942	5	2.2e-05	0.000232	-1.71	down	5	2	11	27	3	18	0.00278	0.00143	0.00422	0.01316	0.00391	0.00924	0.00281	0.00114	0.00877	0.00379
GXT_22791370	AK312425	GXL_193604	GALNTL2	117248	NC_000003	chr3	+	16216184	16269007	2397	10	1e-148	1.36e-145	-2.64	down	80	66	108	550	210	526	0.01598	0.018	0.01553	0.10647	0.105	0.10285	0.0165	0.00107	0.10477	0.00149
GXT_22791377	AK309534	GXL_193597	SLC6A6	6533	NC_000003	chr3	+	14444125	14499569	1124	7	2.51e-10	5.31e-09	-1.02	down	46	37	72	119	43	84	0.01968	0.02108	0.02166	0.05045	0.04603	0.03604	0.02081	0.00083	0.04417	0.00603
GXT_22791395	AK290334	GXL_232703	RSRC1	51319	NC_000003	chr3	+	157827861	158262510	1593	10	1.41e-19	5.81e-18	-1.19	down	82	48	130	194	72	195	0.02437	0.01778	0.02479	0.0526	0.04778	0.05317	0.02231	0.00321	0.05118	0.00242
GXT_22791428	AK292879	GXL_232555	ST6GAL1	6480	NC_000003	chr3	+	186739644	186793756	1717	7	1.29e-33	1.06e-31	-2.2	down	22	11	30	103	38	81	0.00672	0.00411	0.00556	0.02724	0.02433	0.02207	0.00546	0.00107	0.02455	0.00212
GXT_22791526	AK308936	GXL_164857	FGFR3	2261	NC_000004	chr4	+	1808024	1809567	1000	4	0.00826	0.0397	-2.38	down	1	0	5	5	5	7	0.00052	0	0.00181	0.00248	0.00614	0.00299	0.00078	0.00076	0.00387	0.00162
GXT_22791533	AK311462	GXL_175098	FAM149A	25854	NC_000004	chr4	+	187065703	187079529	1408	7	0.00613	0.0311	-1.45	down	5	3	13	7	10	20	0.00186	0.00144	0.00283	0.00228	0.00789	0.00691	0.00204	0.00058	0.00569	0.00245
GXT_22791534	AK308810	GXL_33715	ART3	419	NC_000004	chr4	+	76995866	77020754	1577	5	0.000157	0.00133	-2.35	down	1	2	5	12	7	9	0.00033	0.00086	0.00092	0.00346	0.00545	0.00253	0.0007	0.00027	0.00381	0.00122
GXT_22791539	AK308731	GXL_175133	TRIM2	23321	NC_000004	chr4	+	154125598	154231413	2202	7	2.6e-15	8.32e-14	-1.24	down	38	36	65	95	47	115	0.00905	0.01068	0.01042	0.02037	0.02593	0.02374	0.01005	0.00072	0.02335	0.00229
GXT_22791542	AK313935	GXL_482710	SOD3	6649	NC_000004	chr4	+	24797104	24801866	909	2	1.54e-74	4.85e-72	-1.62	down	91	75	126	287	124	303	0.05136	0.05489	0.04783	0.15491	0.16343	0.1622	0.05136	0.00288	0.16018	0.00376
GXT_22791573	AK308444	GXL_164753	SLIT2	9353	NC_000004	chr4	+	20525384	20598247	2399	20	2.27e-135	2.54e-132	1.92	up	368	336	619	118	33	147	0.07108	0.08079	0.08169	0.02125	0.01433	0.02699	0.07785	0.0048	0.02086	0.00518
GXT_22791612	AK307711	GXL_383240	SYNPO2	171024	NC_000004	chr4	+	119810000	119953032	3294	4	1.88e-27	1.19e-25	-1.11	down	138	99	199	330	119	300	0.02166	0.02025	0.02172	0.04937	0.04398	0.04491	0.02121	0.00068	0.04609	0.00235
GXT_22791631	AK314802	GXL_164818	C1QTNF7	114905	NC_000004	chr4	+	15341612	15444423	1098	3	2.27e-05	0.000239	-2.79	down	0	3	1	5	7	12	0	0.00123	0.00033	0.00226	0.00783	0.00544	0.00052	0.00052	0.00518	0.00228
GXT_22791679	AK312065	GXL_1232744	FGF5/C4orf22	-2	NC_000004	chr4	+	81187793	81207495	558	2	1.87e-37	1.82e-35	1.01	up	490	382	691	243	108	260	0.4522	0.45125	0.44114	0.21295	0.23638	0.22818	0.4482	0.005	0.22584	0.00971
GXT_22791692	AK289455	GXL_316898	EPGN	255324	NC_000004	chr4	+	75174190	75181024	1196	5	1.75e-10	3.76e-09	1.87	up	39	32	55	11	5	11	0.01711	0.01691	0.01541	0.00415	0.00513	0.00416	0.01648	0.00076	0.00448	0.00046
GXT_22791795	AK308835	GXL_27406	CCDC99	54908	NC_000005	chr5	+	169010760	169023182	1617	8	1.45e-29	1.01e-27	1.14	up	255	185	336	85	52	137	0.07573	0.06961	0.06649	0.02342	0.03686	0.03994	0.07061	0.00384	0.03341	0.00717
GXT_22791874	AK315224	GXL_6171	BHMT	635	NC_000005	chr5	+	78407632	78426939	1298	8	0.00605	0.0308	-2.69	down	1	1	2	5	7	3	0.0004	0.00022	0.00056	0.00115	0.00568	0.00115	0.00039	0.00014	0.00266	0.00214
GXT_22791902	AK307620	GXL_27589	MYOT	9499	NC_000005	chr5	+	137203565	137222579	1390	10	0.00422	0.0228	-1.6	down	3	3	2	6	4	11	0.00113	0.00146	0.00052	0.00214	0.00353	0.00358	0.00104	0.00039	0.00308	0.00067
GXT_22791916	AK310442	GXL_27406	CCDC99	54908	NC_000005	chr5	+	169010754	169029025	2144	11	6.99e-44	8.71e-42	1.15	up	420	299	584	159	80	223	0.09563	0.08774	0.08957	0.03423	0.04295	0.04962	0.09098	0.00337	0.04227	0.0063
GXT_22791934	AK310086	GXL_27439	EIF4EBP3	8637	NC_000005	chr5	+	139926835	139927756	922	1	0.00765	0.0374	-1.42	down	7	2	9	16	8	9	0.00361	0.00101	0.00353	0.00846	0.01017	0.00486	0.00272	0.00121	0.00783	0.00221
GXT_22792065	AK314613	GXL_232835	SMOC2	64094	NC_000006	chr6	+	168841864	169067118	1528	13	0.00639	0.0322	-1.76	down	2	3	3	4	6	10	0.00069	0.00132	0.00071	0.00097	0.00321	0.00261	0.00091	0.00029	0.00226	0.00095
GXT_22792132	AK313914	GXL_779630	EDN1	1906	NC_000006	chr6	+	12290594	12296300	905	5	5.27e-13	1.42e-11	1.03	up	122	94	216	70	23	78	0.06613	0.06194	0.0815	0.03725	0.02985	0.03759	0.06986	0.00841	0.0349	0.00357
GXT_22792267	AK307089	GXL_779630	EDN1	1906	NC_000006	chr6	+	12290594	12293113	873	2	1.83e-07	2.8e-06	1.15	up	51	43	111	34	8	34	0.03035	0.03039	0.04426	0.01897	0.01125	0.018	0.035	0.00655	0.01607	0.00343
GXT_22792292	AK309837	GXL_156083	ZSCAN16	80345	NC_000006	chr6	+	28092387	28094971	898	3	0.00239	0.014	-1.36	down	7	3	11	15	7	18	0.00409	0.00225	0.00422	0.00773	0.00867	0.00833	0.00352	0.0009	0.00824	0.00039
GXT_22792413	AK291621	GXL_926176	DDR1	780	NC_000006	chr6	+	30850694	30867617	3284	17	1.8e-92	9.03e-90	-1.22	down	609	455	831	1432	612	1441	0.09071	0.08694	0.08683	0.20035	0.21249	0.20284	0.08816	0.0018	0.20523	0.00524
GXT_22792415	AK291427	GXL_261223	SLC25A27	9481	NC_000006	chr6	+	46620722	46644750	1739	9	1.89e-09	3.64e-08	-1.58	down	22	5	30	64	21	39	0.00513	0.00194	0.00582	0.01584	0.01345	0.01088	0.0043	0.00169	0.01339	0.00203
GXT_22792460	AK309120	GXL_1235853	SUN1/GET4	-2	NC_000007	chr7	+	856280	883509	1281	7	1.12e-28	7.45e-27	-1.17	down	127	92	174	307	113	291	0.04925	0.04508	0.04462	0.10857	0.09822	0.10327	0.04632	0.00208	0.10335	0.00423
GXT_22792471	AK308931	GXL_33472	STAG3L4	64940	NC_000007	chr7	+	66767640	66785705	1164	6	6.09e-06	7.24e-05	-1.02	down	32	21	43	56	30	61	0.01397	0.01123	0.01304	0.0213	0.02742	0.02329	0.01275	0.00114	0.024	0.00255
GXT_22792500	AK313832	GXL_744872	AQP1	358	NC_000007	chr7	+	30791753	30795467	803	3	5.89e-05	0.000558	-1.58	down	6	7	2	19	8	14	0.00392	0.00504	0.0009	0.01173	0.01129	0.00868	0.00329	0.00175	0.01057	0.00135
GXT_22792513	AK308289	GXL_33674	PHTF2	57157	NC_000007	chr7	+	77428157	77579090	2108	15	9.95e-42	1.16e-39	1.11	up	443	321	607	207	87	207	0.09912	0.09242	0.0945	0.04209	0.04601	0.04395	0.09535	0.0028	0.04402	0.0016
GXT_22792518	AK313553	GXL_78423	LEP	3952	NC_000007	chr7	+	127881333	127894816	559	3	2.23e-213	9.18e-210	-2.65	down	56	52	83	434	165	366	0.04974	0.0579	0.05365	0.3714	0.35146	0.3163	0.05376	0.00333	0.34639	0.02278
GXT_22792522	AK310933	GXL_78255	CPA4	51200	NC_000007	chr7	+	129933001	129946116	1026	7	9.55e-19	3.77e-17	2.38	up	62	41	93	15	3	14	0.02761	0.023	0.02932	0.00532	0.00359	0.00631	0.02664	0.00267	0.00507	0.00112
GXT_22792549	AK314925	GXL_33493	IGFBP1	3484	NC_000007	chr7	+	45928087	45932690	945	4	2.32e-05	0.000243	-1.14	down	15	16	22	27	19	46	0.0069	0.0107	0.00803	0.01364	0.02339	0.02266	0.00854	0.00159	0.0199	0.00443
GXT_22792587	AK310146	GXL_35056	LOC100507642	100507642	NC_000007	chr7	+	149744	154011	992	2	0.00736	0.0362	-1.23	down	6	5	9	14	8	13	0.00317	0.0034	0.00328	0.007	0.0099	0.00653	0.00328	9e-05	0.00781	0.00149
GXT_22792594	AK312688	GXL_78242	MEST	4232	NC_000007	chr7	+	130131985	130144897	1178	12	9.57e-54	1.66e-51	1.4	up	342	249	507	131	56	138	0.12895	0.11906	0.13262	0.04825	0.04586	0.0499	0.12688	0.00573	0.048	0.00166
GXT_22792600	AK312480	GXL_1236531	CDK14	5218	NC_000007	chr7	+	90032763	90042725	1002	4	3.96e-19	1.6e-17	1.15	up	169	143	237	79	31	93	0.08617	0.09354	0.08243	0.03761	0.03431	0.04474	0.08738	0.00462	0.03889	0.00435
GXT_22792616	AK309519	GXL_744872	AQP1	358	NC_000007	chr7	+	30737601	30795586	1057	4	1.26e-05	0.00014	-1.77	down	3	7	2	20	7	12	0.00149	0.00383	0.00068	0.00938	0.00768	0.00565	0.002	0.00134	0.00757	0.00152
GXT_22792634	AK290363	GXL_35035	SCIN	85477	NC_000007	chr7	+	12610312	12692472	2381	16	1.31e-06	1.76e-05	-1.43	down	12	16	10	29	22	31	0.00264	0.00425	0.00151	0.00513	0.01031	0.00523	0.0028	0.00112	0.00689	0.00242
GXT_22792636	AK290305	GXL_826880	LRRC17	10234	NC_000007	chr7	+	102553453	102585076	1628	4	0.000353	0.00271	3.57	up	7	7	9	0	0	2	0.00228	0.0029	0.002	0	0	0.00061	0.00239	0.00038	0.0002	0.00029
GXT_22792654	AK289588	GXL_35190	GPER	2852	NC_000007	chr7	+	1127749	1132508	1675	2	7.79e-09	1.4e-07	-1.22	down	31	20	35	63	32	58	0.00955	0.00805	0.00755	0.01851	0.02346	0.01725	0.00838	0.00085	0.01974	0.00268
GXT_22792666	AK292916	GXL_779662	CREB5	9586	NC_000007	chr7	+	28530748	28859254	1944	10	1.81e-14	5.42e-13	2.52	up	47	26	68	10	1	11	0.01155	0.0088	0.01162	0.00255	0.00065	0.00256	0.01066	0.00131	0.00192	0.0009
GXT_22792695	AK291590	GXL_35190	GPER	2852	NC_000007	chr7	+	1121844	1132508	1533	2	1.03e-08	1.83e-07	-1.22	down	29	19	34	59	30	58	0.00974	0.00836	0.00801	0.01893	0.02403	0.01884	0.0087	0.00075	0.0206	0.00243
GXT_22792697	AK291441	GXL_78393	PRKAR2B	5577	NC_000007	chr7	+	106685341	106800129	1371	11	1.85e-14	5.54e-13	-2.08	down	10	7	10	35	19	35	0.00344	0.00344	0.00222	0.01193	0.01701	0.01126	0.00303	0.00058	0.0134	0.00257
GXT_22792705	AK290993	GXL_78255	CPA4	51200	NC_000007	chr7	+	129932974	129962940	1737	11	1.39e-109	9.87e-107	2.37	up	191	136	294	42	14	40	0.05256	0.04891	0.05616	0.00999	0.00879	0.01118	0.05254	0.00296	0.00999	0.00098
GXT_22792723	AK311857	GXL_67245	PKIA	5569	NC_000008	chr8	+	79503466	79514056	311	3	0.00977	0.0455	1.3	up	19	13	15	4	2	11	0.03094	0.02819	0.01626	0.00467	0.0079	0.01602	0.02513	0.00637	0.00953	0.00477
GXT_22792728	AK314287	GXL_42344	SLC7A2	6542	NC_000008	chr8	+	17354600	17422655	2146	12	2.18e-05	0.00023	-1.24	down	8	15	21	43	16	23	0.00171	0.0044	0.00337	0.00855	0.00801	0.00487	0.00316	0.00111	0.00714	0.00162
GXT_22792737	AK311595	GXL_67196	CHRAC1	54108	NC_000008	chr8	+	141522017	141525284	925	2	1.79e-05	0.000192	-1.4	down	12	9	18	28	17	31	0.00624	0.00553	0.00707	0.01285	0.02256	0.01513	0.00628	0.00063	0.01685	0.00415
GXT_22792746	AK308709	GXL_67196	CHRAC1	54108	NC_000008	chr8	+	141521527	141526566	1561	2	4.25e-61	9.39e-59	-1.33	down	143	98	164	333	136	354	0.04806	0.04185	0.03797	0.10469	0.10697	0.11228	0.04263	0.00416	0.10798	0.00318
GXT_22792753	AK313864	GXL_483765	ADAM32	203102	NC_000008	chr8	+	38965227	39141150	2433	24	0.0109	0.0497	-1.12	down	5	4	9	14	4	14	0.00108	0.00111	0.00119	0.00224	0.00151	0.00266	0.00113	5e-05	0.00214	0.00048
GXT_22792758	AK311257	GXL_67300	PTP4A3	11156	NC_000008	chr8	+	142402121	142432272	849	2	0.000992	0.00666	-1.11	down	10	9	9	19	9	23	0.00618	0.00715	0.00383	0.01051	0.01301	0.01349	0.00572	0.00139	0.01234	0.00131
GXT_22792777	AK308071	GXL_67209	TMEM67	91147	NC_000008	chr8	+	94767072	94800159	1461	15	1.45e-06	1.94e-05	-1.06	down	26	23	70	74	35	70	0.0079	0.00923	0.01483	0.02138	0.02353	0.01943	0.01065	0.003	0.02145	0.00167
GXT_22792786	AK313373	GXL_42514	GINS4	84296	NC_000008	chr8	+	41386780	41399606	827	8	0.000534	0.00388	1.01	up	39	15	44	13	6	19	0.02093	0.01171	0.01573	0.00659	0.00891	0.00903	0.01612	0.00377	0.00818	0.00112
GXT_22792790	AK310816	GXL_67212	BAALC	79870	NC_000008	chr8	+	104225559	104241373	1421	2	2.25e-11	5.29e-10	1.46	up	50	64	76	25	10	22	0.01846	0.02994	0.01877	0.0087	0.00864	0.00751	0.02239	0.00534	0.00828	0.00055
GXT_22792830	AK312355	GXL_67385	NOV	4856	NC_000008	chr8	+	120428686	120435372	1161	5	3.72e-85	1.51e-82	-1.89	down	67	54	107	270	114	279	0.02892	0.03021	0.03205	0.1106	0.10892	0.11369	0.03039	0.00128	0.11107	0.00198
GXT_22792838	AK289944	GXL_42390	LETM2	137994	NC_000008	chr8	+	38244002	38250953	1060	3	0.00141	0.009	1.32	up	13	13	32	11	2	6	0.00594	0.00827	0.01023	0.00468	0.00232	0.00282	0.00815	0.00175	0.00327	0.00102
GXT_22792839	AK289927	GXL_42336	NRG1	3084	NC_000008	chr8	+	32504251	32600399	1990	3	5.22e-05	0.000502	1.42	up	16	13	36	6	4	7	0.00329	0.00387	0.00584	0.00149	0.00146	0.00167	0.00433	0.00109	0.00154	9e-05
GXT_22792841	AK289650	GXL_42295	EPB49	2039	NC_000008	chr8	+	21912402	21939052	1451	15	0.00678	0.0339	-1.27	down	5	2	6	14	2	11	0.00145	0.00093	0.00125	0.00444	0.00169	0.00343	0.00121	0.00021	0.00319	0.00114
GXT_22792844	AK289450	GXL_42491	PDGFRL	5157	NC_000008	chr8	+	17433942	17500504	1767	7	7.5e-12	1.83e-10	-1.33	down	23	20	32	57	22	78	0.00665	0.00763	0.00634	0.01471	0.01529	0.02142	0.00687	0.00055	0.01714	0.00304
GXT_22792845	AK293096	GXL_67351	KCNS2	3788	NC_000008	chr8	+	99439914	99441698	1785	1	0.00996	0.0462	1.77	up	6	8	11	2	1	3	0.00176	0.00302	0.00223	0.00056	0.00069	0.00084	0.00234	0.00052	0.0007	0.00011
GXT_22792854	AK292737	GXL_67197	STMN2	11075	NC_000008	chr8	+	80523377	80577552	1037	5	0.00236	0.0139	-2.29	down	0	1	3	8	1	7	0	0.00065	0.0007	0.00382	0.00118	0.00335	0.00045	0.00032	0.00278	0.00115
GXT_22792874	AK291436	GXL_67290	C8orf34	116328	NC_000008	chr8	+	69243485	69445869	1353	7	5.35e-07	7.64e-06	-1.33	down	14	14	19	44	17	35	0.00504	0.00598	0.00454	0.01378	0.0127	0.01164	0.00519	0.0006	0.01271	0.00087
GXT_22792877	AK291394	GXL_42441	ERLIN2	11160	NC_000008	chr8	+	37594145	37611811	1265	12	1.13e-48	1.69e-46	-1.31	down	166	120	241	429	161	461	0.06031	0.05723	0.0581	0.14774	0.13142	0.16114	0.05855	0.0013	0.14677	0.01215
GXT_22792887	AK290730	GXL_42336	NRG1	3084	NC_000008	chr8	+	32405829	32622006	2416	12	2.61e-27	1.63e-25	1.84	up	107	91	183	30	16	35	0.02085	0.02283	0.02439	0.00566	0.0073	0.00673	0.02269	0.00145	0.00656	0.00068
GXT_22792891	AK314600	GXL_184925	AIF1L	83543	NC_000009	chr9	+	133971917	133995709	553	6	0.00823	0.0396	#NAME?	down	0	0	0	2	1	3	0	0	0	0.00067	0.00086	0.00104	0	0	0.00086	0.00015
GXT_22792892	AK314567	GXL_12701	CD274	29126	NC_000009	chr9	+	5450542	5467862	942	7	5.99e-05	0.000567	3.06	up	12	8	13	1	0	3	0.00557	0.00501	0.00384	0.00053	0	0.00159	0.00481	0.00072	0.00071	0.00066
GXT_22792893	AK314533	GXL_15132	TMOD1	7111	NC_000009	chr9	+	100263465	100361980	1213	10	0.00195	0.0118	-1.65	down	4	1	6	7	3	17	0.00147	0.00056	0.00131	0.00245	0.00304	0.00616	0.00111	0.0004	0.00388	0.00163
GXT_22792969	AK315093	GXL_185059	ASS1	445	NC_000009	chr9	+	133320345	133376408	1282	15	1.03e-73	3.16e-71	-1.62	down	283	186	330	817	356	757	0.09502	0.08291	0.07952	0.26911	0.29936	0.2504	0.08582	0.00665	0.27296	0.02017
GXT_22792984	AK314924	GXL_827313	TMEFF1	8577	NC_000009	chr9	+	103189635	103213248	902	3	2.24e-34	1.89e-32	1.03	up	559	407	769	291	117	260	0.31587	0.29733	0.30181	0.15737	0.15514	0.14185	0.305	0.0079	0.15145	0.00685
GXT_22793024	AK307243	GXL_15227	GLIPR2	152007	NC_000009	chr9	+	36136732	36162773	893	5	5.13e-42	6.07e-40	1.05	up	451	328	584	201	109	187	0.23909	0.23157	0.21525	0.10439	0.13886	0.09648	0.22864	0.00995	0.11324	0.0184
GXT_22793080	AK293114	GXL_185059	ASS1	445	NC_000009	chr9	+	133320345	133376654	1528	15	3.58e-204	1.33e-200	-1.61	down	317	213	367	910	401	852	0.09139	0.08148	0.07548	0.25596	0.28732	0.24105	0.08278	0.00656	0.26144	0.01928
GXT_22793143	AK311467	GXL_745112	AFF2	2334	NC_000023	chrX	+	148062259	148076352	898	2	3.01e-07	4.46e-06	-1.53	down	10	9	10	35	10	28	0.00584	0.00676	0.00402	0.01931	0.01367	0.01553	0.00554	0.00114	0.01617	0.00235
GXT_22793176	AK315284	GXL_11927	PAK3	5063	NC_000023	chrX	+	110187625	110463675	1967	16	2.29e-05	0.000241	1.54	up	20	15	40	11	3	6	0.00447	0.00483	0.0068	0.00277	0.00187	0.00152	0.00537	0.00102	0.00205	0.00053
GXT_22793349	AK291769	GXL_16180	MAOA	4128	NC_000023	chrX	+	43515551	43603997	1860	15	1.63e-90	7.86e-88	-2.47	down	57	43	95	315	158	347	0.01423	0.01451	0.0169	0.07515	0.09175	0.0814	0.01521	0.0012	0.08277	0.00685
GXT_22793428	AK290581	GXL_193541	PPARG	5468	NC_000003	chr3	+	12329424	12475842	1804	8	1.62e-34	1.38e-32	-1.34	down	112	59	124	212	122	225	0.02994	0.0213	0.02423	0.05496	0.07622	0.05728	0.02516	0.00359	0.06282	0.00952
GXT_22793459	AK290504	GXL_11927	PAK3	5063	NC_000023	chrX	+	110187469	110463914	2289	15	8.9e-05	0.000806	1.41	up	21	15	41	12	3	8	0.00407	0.00415	0.006	0.0026	0.00161	0.00174	0.00474	0.00089	0.00198	0.00044
GXT_22793566	NM_001100163	GXL_664106	MRVI1	10335	NC_000011	chr11	-	10594638	10655621	5758	19	1.27e-64	3.1e-62	-1.21	down	780	578	1186	1910	773	1939	0.06765	0.06486	0.07117	0.15679	0.15765	0.16041	0.06789	0.00258	0.15828	0.00154
GXT_22794222	NM_001099781	GXL_249853	GGT5	2687	NC_000022	chr22	-	24615622	24641110	2497	12	6.04e-119	5.01e-116	-1.7	down	388	336	521	1263	608	1311	0.07305	0.08124	0.06916	0.2251	0.27238	0.23561	0.07448	0.00503	0.24436	0.02027
GXT_22794711	NM_001099747	GXL_172608	SYBU	55638	NC_000008	chr8	-	110586405	110661132	2992	8	3.49e-09	6.51e-08	-1.36	down	28	17	28	56	31	56	0.00473	0.00361	0.00338	0.00911	0.01273	0.00916	0.00391	0.00059	0.01033	0.00169
GXT_22794729	NM_001099756	GXL_172608	SYBU	55638	NC_000008	chr8	-	110586405	110655419	2956	6	2.68e-09	5.07e-08	-1.35	down	28	17	28	55	31	56	0.00479	0.00365	0.00342	0.00912	0.01288	0.00927	0.00395	0.0006	0.01042	0.00174
GXT_22794730	NM_001099746	GXL_172608	SYBU	55638	NC_000008	chr8	-	110586405	110693234	2788	6	2.48e-09	4.7e-08	-1.37	down	27	17	27	55	31	54	0.00489	0.00387	0.0035	0.00967	0.01366	0.00947	0.00409	0.00059	0.01093	0.00193
GXT_22794740	NM_001099752	GXL_172608	SYBU	55638	NC_000008	chr8	-	110586405	110657822	3084	8	3.49e-09	6.51e-08	-1.36	down	28	17	28	56	31	56	0.00459	0.0035	0.00328	0.00884	0.01235	0.00888	0.00379	0.00057	0.01002	0.00165
GXT_22795474	NM_001103161	GXL_34829	SH2D5	400745	NC_000001	chr1	-	21046225	21059133	3834	10	0.00182	0.0112	1.04	up	24	18	36	13	5	12	0.00328	0.00317	0.0034	0.00168	0.0014	0.00149	0.00328	9e-05	0.00152	0.00012
GXT_22795707	NM_001114090	GXL_89147	NGEF	25791	NC_000002	chr2	-	233743396	233792861	2812	13	2.13e-08	3.62e-07	-1.58	down	15	7	16	40	13	39	0.0028	0.00144	0.00167	0.00706	0.00524	0.00638	0.00197	0.00059	0.00623	0.00075
GXT_22795865	NM_032432	GXL_125095	ABLIM2	84448	NC_000004	chr4	-	7967037	8160559	3389	15	0.00131	0.00843	-2.35	down	2	0	4	10	3	8	0.00031	0	0.00043	0.00102	0.00109	0.00118	0.00025	0.00018	0.0011	7e-05
GXT_22796151	NM_001099754	GXL_172608	SYBU	55638	NC_000008	chr8	-	110586405	110657051	2885	7	3.12e-09	5.85e-08	-1.33	down	28	18	28	56	31	56	0.00491	0.00397	0.00351	0.00945	0.0132	0.0095	0.00413	0.00058	0.01072	0.00176
GXT_22796189	NM_001099745	GXL_172608	SYBU	55638	NC_000008	chr8	-	110586405	110693234	3074	8	3.49e-09	6.51e-08	-1.36	down	28	17	28	56	31	56	0.00461	0.00351	0.00329	0.00887	0.01239	0.00891	0.0038	0.00058	0.01006	0.00165
GXT_22796480	NM_001100167	GXL_664106	MRVI1	10335	NC_000011	chr11	-	10594638	10673732	5812	19	4.85e-65	1.2e-62	-1.2	down	779	572	1182	1905	763	1925	0.06707	0.0636	0.07041	0.15512	0.15457	0.15791	0.06703	0.00278	0.15587	0.00146
GXT_22796513	NM_173601	GXL_139739	GXYLT1	283464	NC_000012	chr12	-	42475647	42538673	7489	8	5.25e-44	6.57e-42	1.31	up	373	305	645	182	62	186	0.02591	0.02719	0.03059	0.01165	0.01017	0.01203	0.0279	0.00197	0.01128	0.0008
GXT_22796514	NM_001111283	GXL_66188	IGF1	3479	NC_000012	chr12	-	102789645	102874378	7370	5	0.00581	0.0297	-2.04	down	2	1	2	7	3	6	0.00014	9e-05	0.0001	0.00047	0.0005	0.00041	0.00011	2e-05	0.00046	4e-05
GXT_22796533	NM_001111284	GXL_66188	IGF1	3479	NC_000012	chr12	-	102789645	102872429	7204	4	0.00581	0.0297	-2.04	down	2	1	2	7	3	6	0.00015	9e-05	0.0001	0.00048	0.00051	0.00041	0.00011	3e-05	0.00047	4e-05
GXT_22796943	NM_001114172	GXL_218269	PIK3R3	8503	NC_000001	chr1	-	46505812	46598708	5176	11	5.22e-31	3.87e-29	1.18	up	213	180	316	94	37	126	0.02114	0.02306	0.02126	0.00871	0.00854	0.01193	0.02182	0.00088	0.00973	0.00156
GXT_22797536	NM_020911	GXL_695062	PLXNA4	91584	NC_000007	chr7	-	131808091	132261323	13061	32	9.58e-125	9.08e-122	-1.8	down	134	103	229	530	204	537	0.00514	0.00524	0.00622	0.01959	0.01874	0.01986	0.00553	0.00049	0.0194	0.00048
GXT_22797539	NM_001105543	GXL_695062	PLXNA4	91584	NC_000007	chr7	-	132068247	132261323	3408	4	3.73e-19	1.51e-17	-1.73	down	20	16	25	58	30	72	0.00292	0.00297	0.00265	0.00829	0.01081	0.01026	0.00285	0.00014	0.00979	0.00108
GXT_22797793	NM_004229	GXL_384630	MED14	9282	NC_000023	chrX	-	40508795	40594804	6768	31	1.23e-37	1.21e-35	-1.13	down	274	204	421	610	265	666	0.01969	0.01883	0.02023	0.0408	0.04444	0.04467	0.01958	0.00058	0.0433	0.00177
GXT_22798406	NM_001103160	GXL_34829	SH2D5	400745	NC_000001	chr1	-	21046225	21059133	3705	9	0.000722	0.00506	1.19	up	23	18	35	13	4	10	0.00326	0.00328	0.00342	0.00174	0.00133	0.00134	0.00332	7e-05	0.00147	0.00019
GXT_22798557	NM_001099782	GXL_249853	GGT5	2687	NC_000022	chr22	-	24615622	24641110	2398	11	4.27e-124	3.93e-121	-1.69	down	380	325	504	1235	584	1265	0.07449	0.08217	0.06996	0.22984	0.27327	0.23761	0.07554	0.00504	0.24691	0.01891
GXT_22798679	NM_001112800	GXL_75598	SLC8A1	6546	NC_000002	chr2	-	40339286	40657444	6038	9	6.88e-61	1.51e-58	1.02	up	692	555	1073	371	147	391	0.05975	0.06075	0.06321	0.03035	0.02949	0.03182	0.06124	0.00145	0.03055	0.00096
GXT_22798855	NM_001104631	GXL_159402	PDE4D	5144	NC_000005	chr5	-	58264865	58511795	7602	14	3.14e-34	2.63e-32	-1.41	down	88	62	115	253	75	262	0.00608	0.00527	0.0053	0.01595	0.01163	0.01691	0.00555	0.00037	0.01483	0.0023
GXT_22799051	NM_001099748	GXL_172608	SYBU	55638	NC_000008	chr8	-	110586405	110661132	2995	8	3.49e-09	6.51e-08	-1.36	down	28	17	28	56	31	56	0.00473	0.0036	0.00338	0.00911	0.01272	0.00915	0.0039	0.00059	0.01033	0.00169
GXT_22799054	NM_001099750	GXL_172608	SYBU	55638	NC_000008	chr8	-	110586405	110661132	3116	9	3.49e-09	6.51e-08	-1.36	down	28	17	28	56	31	56	0.00455	0.00346	0.00325	0.00875	0.01222	0.00879	0.00375	0.00057	0.00992	0.00163
GXT_22799076	NM_001099744	GXL_172608	SYBU	55638	NC_000008	chr8	-	110586405	110704020	3238	8	3.49e-09	6.51e-08	-1.36	down	28	17	28	56	31	56	0.00437	0.00333	0.00312	0.00842	0.01176	0.00846	0.00361	0.00055	0.00955	0.00157
GXT_22799082	NM_001099753	GXL_172608	SYBU	55638	NC_000008	chr8	-	110586405	110657051	2882	7	3.12e-09	5.85e-08	-1.33	down	28	18	28	56	31	56	0.00491	0.00398	0.00351	0.00946	0.01322	0.00951	0.00413	0.00058	0.01073	0.00176
GXT_22799085	NM_001099749	GXL_172608	SYBU	55638	NC_000008	chr8	-	110586405	110661132	2709	6	2.48e-09	4.7e-08	-1.37	down	27	17	27	55	31	54	0.00503	0.00398	0.0036	0.00995	0.01406	0.00974	0.0042	0.0006	0.01125	0.00199
GXT_22799087	NM_001099755	GXL_172608	SYBU	55638	NC_000008	chr8	-	110586405	110657051	2680	6	2.93e-09	5.52e-08	-1.35	down	27	18	27	56	31	54	0.00509	0.00428	0.00364	0.01018	0.01421	0.00985	0.00434	0.00059	0.01141	0.00198
GXT_22799101	NM_001099743	GXL_172608	SYBU	55638	NC_000008	chr8	-	110586405	110704020	3235	8	3.49e-09	6.51e-08	-1.36	down	28	17	28	56	31	56	0.00438	0.00333	0.00313	0.00843	0.01177	0.00847	0.00361	0.00055	0.00956	0.00157
GXT_22799632	NM_001100812	GXL_252273	CXCL16	58191	NC_000017	chr17	-	4637804	4643223	1451	5	1.42e-39	1.52e-37	-1.54	down	62	54	91	173	78	236	0.02006	0.02464	0.02144	0.05692	0.06088	0.07627	0.02205	0.00192	0.06469	0.00835
GXT_22800133	NM_001112801	GXL_75598	SLC8A1	6546	NC_000002	chr2	-	40339286	40657444	6014	8	6.23e-60	1.31e-57	1.02	up	698	564	1091	379	150	396	0.06051	0.062	0.06454	0.03113	0.03022	0.03231	0.06235	0.00166	0.03122	0.00086
GXT_22800343	NM_014722	GXL_694612	FAM65B	9750	NC_000006	chr6	-	24804513	24911195	5471	23	1.25e-35	1.12e-33	-2.36	down	20	18	22	119	39	104	0.00182	0.0021	0.00135	0.00983	0.00853	0.00883	0.00176	0.00031	0.00906	0.00056
GXT_22800565	NM_001099751	GXL_172608	SYBU	55638	NC_000008	chr8	-	110586405	110657822	3081	8	3.49e-09	6.51e-08	-1.36	down	28	17	28	56	31	56	0.0046	0.0035	0.00328	0.00885	0.01236	0.00889	0.00379	0.00058	0.01003	0.00165
GXT_22800682	NM_001105243	GXL_89542	PCDH19	57526	NC_000023	chrX	-	99546642	99665271	9615	5	1.4e-12	3.64e-11	1.88	up	57	27	75	13	5	16	0.00304	0.00189	0.00282	0.00067	0.00064	0.00083	0.00258	0.0005	0.00071	8e-05
GXT_22800876	NM_001099650	GXL_139739	GXYLT1	283464	NC_000012	chr12	-	42475647	42538673	7396	7	2.14e-44	2.71e-42	1.3	up	369	304	638	179	62	186	0.026	0.02744	0.03065	0.0117	0.0103	0.01219	0.02803	0.00194	0.0114	0.0008
GXT_22801406	NM_001112802	GXL_75598	SLC8A1	6546	NC_000002	chr2	-	40339286	40739575	6032	8	7.12e-60	1.5e-57	1.02	up	698	563	1091	379	150	396	0.06033	0.06175	0.06435	0.03104	0.03013	0.03222	0.06214	0.00166	0.03113	0.00086
GXT_22802520	NM_001113226	GXL_693119	NTNG1	22854	NC_000001	chr1	+	107682629	108024475	3351	8	7.32e-06	8.55e-05	2.4	up	14	11	16	1	2	2	0.00219	0.00201	0.00173	0.00015	0.00073	0.0003	0.00198	0.00019	0.00039	0.00025
GXT_22802551	NM_001113380	GXL_57646	RGS4	5999	NC_000001	chr1	+	163041695	163046592	3055	5	9.1e-183	2.44e-179	1.85	up	8037	5970	12197	2430	924	2392	1.33343	1.27819	1.39792	0.37868	0.35911	0.37801	1.33651	0.04893	0.37193	0.00907
GXT_22803236	NM_001114136	GXL_42295	EPB49	2039	NC_000008	chr8	+	21912328	21940036	2509	15	0.000118	0.00103	-1.26	down	10	4	6	23	2	21	0.00188	0.00107	0.00072	0.00435	0.00098	0.00397	0.00122	0.00049	0.0031	0.00151
GXT_22803265	NM_001114137	GXL_42295	EPB49	2039	NC_000008	chr8	+	21911081	21940036	2602	14	0.000145	0.00124	-1.24	down	10	5	6	23	3	21	0.00181	0.0013	0.00069	0.00419	0.00142	0.00392	0.00127	0.00046	0.00318	0.00125
GXT_22803288	NR_015444	GXL_15159	LOC100128076	100128076	NC_000009	chr9	+	94895116	94900911	2012	13	0.00974	0.0454	2.85	up	7	2	6	1	0	1	0.00156	0.00067	0.00108	0.00025	0	0.00025	0.0011	0.00036	0.00017	0.00012
GXT_22804151	NR_003714	GXL_744617	POM121L9P	29774	NC_000022	chr22	+	24647589	24661492	5224	7	5.88e-24	3.09e-22	-1.39	down	52	30	82	133	56	137	0.00522	0.00387	0.00567	0.01253	0.01316	0.01306	0.00492	0.00076	0.01292	0.00028
GXT_22804344	XM_001714709	GXL_382986	LOC644662	644662	NC_000003	chr3	+	125985645	126010368	741	3	0.00477	0.0252	-3.21	down	0	1	0	6	2	2	0	0.00091	0	0.00401	0.00331	0.00134	0.0003	0.00043	0.00289	0.00113
GXT_22805496	NM_001113381	GXL_57646	RGS4	5999	NC_000001	chr1	+	163039044	163046592	2924	4	1.04e-195	3.29e-192	1.86	up	7762	5738	11693	2323	866	2326	1.34948	1.28675	1.40223	0.37932	0.35283	0.38515	1.34615	0.0472	0.37243	0.01406
GXT_22806228	NM_001114139	GXL_42295	EPB49	2039	NC_000008	chr8	+	21912328	21940036	2501	13	0.000145	0.00124	-1.24	down	10	5	6	23	3	21	0.00189	0.00135	0.00072	0.00436	0.00147	0.00408	0.00132	0.00048	0.0033	0.0013
GXT_22806602	NM_000623	GXL_692033	BDKRB2	624	NC_000014	chr14	+	96671135	96710666	4197	3	1.1e-50	1.77e-48	1.16	up	328	284	487	148	64	184	0.04099	0.04554	0.04161	0.01742	0.0187	0.0216	0.04271	0.00201	0.01924	0.00175
GXT_22807063	NM_001113482	GXL_316525	MANEAL	149175	NC_000001	chr1	+	38259774	38267278	2858	4	0.000137	0.00118	-1.33	down	9	8	25	22	16	36	0.00165	0.00189	0.00303	0.00382	0.00644	0.00628	0.00219	0.0006	0.00551	0.0012
GXT_22807706	NM_001114135	GXL_42295	EPB49	2039	NC_000008	chr8	+	21915376	21940036	2552	15	0.0001	0.000892	-1.26	down	10	5	6	23	3	22	0.00185	0.00132	0.00071	0.00427	0.00144	0.0041	0.00129	0.00047	0.00327	0.0013
GXT_22808477	NM_001113228	GXL_693119	NTNG1	22854	NC_000001	chr1	+	107682629	108024475	3174	8	7.32e-06	8.55e-05	2.4	up	14	11	16	1	2	2	0.00231	0.00212	0.00182	0.00016	0.00077	0.00031	0.00208	0.0002	0.00041	0.00026
GXT_22808570	NM_001099772	GXL_46989	CYP4B1	1580	NC_000001	chr1	+	47264670	47285021	2158	12	1.39e-07	2.16e-06	#NAME?	down	0	0	0	12	2	7	0	0	0	0.00253	0.00114	0.00162	0	0	0.00176	0.00058
GXT_22808913	NM_017785	GXL_27406	CCDC99	54908	NC_000005	chr5	+	169010638	169031782	2668	12	1.26e-38	1.29e-36	1.17	up	554	409	799	214	108	290	0.10272	0.09778	0.10022	0.0374	0.0474	0.05208	0.10024	0.00202	0.04563	0.00612
GXT_22809191	NM_001114138	GXL_42295	EPB49	2039	NC_000008	chr8	+	21916686	21940036	2574	14	0.000173	0.00145	-1.23	down	10	4	6	23	2	20	0.00183	0.00105	0.0007	0.00424	0.00095	0.00377	0.00119	0.00047	0.00299	0.00145
GXT_22809807	NM_001102445	GXL_57646	RGS4	5999	NC_000001	chr1	+	163038396	163046592	3480	6	1.32e-278	1.28e-274	1.86	up	8425	6220	12694	2533	952	2495	1.22172	1.1637	1.27083	0.34436	0.32352	0.3447	1.21875	0.04379	0.33753	0.00991
GXT_22810052	NM_001102608	GXL_482555	COL6A6	131873	NC_000003	chr3	+	130279178	130395888	8470	36	0.000207	0.00169	2	up	14	9	20	5	1	3	0.00074	0.00072	0.00077	0.00029	0.00014	0.00018	0.00074	2e-05	0.0002	6e-05
GXT_22810351	NM_001112706	GXL_35035	SCIN	85477	NC_000007	chr7	+	12610203	12693228	3246	16	1.42e-07	2.2e-06	-1.33	down	18	18	16	37	24	44	0.00291	0.00353	0.00178	0.00499	0.00832	0.00583	0.00274	0.00072	0.00638	0.00141
GXT_22811470	ENSCAFT00000018862	GXL_779452	DOK5	55816	NC_000020	chr20	+	53169670	53267018	944	8	1.02e-19	4.25e-18	1.1	up	167	117	244	62	39	83	0.08079	0.07393	0.08484	0.02836	0.04753	0.03957	0.07985	0.0045	0.03849	0.00786
GXT_22811476	ENSCAFT00000011203	GXL_825307	REM1	28954	NC_000020	chr20	+	30063224	30072077	816	5	2.25e-05	0.000237	-2.89	down	1	1	1	10	1	11	0.00064	0.00083	0.00044	0.00608	0.0015	0.0061	0.00064	0.00016	0.00456	0.00216
GXT_22811582	ENSCAFT00000010923	GXL_171157	ADAMTS9	56999	NC_000003	chr3	-	64524797	64589735	2083	13	3.88e-10	8.06e-09	-1.74	down	10	7	15	38	11	39	0.00227	0.0021	0.00225	0.00809	0.0053	0.00885	0.00221	8e-05	0.00741	0.00153
GXT_22811767	ENSCAFT00000037995	GXL_664422	PTPLAD2	401494	NC_000009	chr9	-	21007042	21016011	425	4	7.89e-07	1.1e-05	-1.18	down	28	9	31	52	17	52	0.03016	0.01428	0.02421	0.05186	0.04189	0.05521	0.02288	0.00655	0.04965	0.00566
GXT_22811808	ENSCAFT00000006873	GXL_40647	WDFY2	115825	NC_000013	chr13	+	52234730	52333905	1068	11	1.65e-19	6.79e-18	1.26	up	178	152	282	92	26	97	0.0714	0.08045	0.0805	0.03453	0.02469	0.03801	0.07745	0.00428	0.03241	0.00564
GXT_22811903	ENSCAFT00000003274	GXL_33947	KIT	3815	NC_000004	chr4	+	55561409	55604723	2933	21	6.09e-05	0.000575	1.19	up	30	35	44	15	7	17	0.00498	0.00713	0.00468	0.00203	0.00251	0.00238	0.0056	0.00109	0.00231	0.0002
GXT_22811926	ENSCAFT00000036594	GXL_33838	MYOZ2	51778	NC_000004	chr4	+	120072026	120107536	901	4	0.00719	0.0355	-1.15	down	7	6	14	12	10	21	0.00323	0.00449	0.00561	0.00633	0.01363	0.01077	0.00444	0.00097	0.01024	0.003
GXT_22811937	ENSCAFT00000026343	GXL_164753	SLIT2	9353	NC_000004	chr4	+	20469341	20620629	4229	33	4.26e-200	1.42e-196	1.84	up	691	626	1164	222	77	270	0.07588	0.086	0.08785	0.02277	0.01902	0.028	0.08324	0.00526	0.02326	0.00368
GXT_22812079	ENSCAFT00000029078	GXL_27441	AFAP1L1	134265	NC_000005	chr5	+	148677355	148720331	3102	19	3.33e-14	9.81e-13	-1.1	down	48	48	70	121	52	112	0.00744	0.00891	0.00745	0.01774	0.02019	0.01654	0.00793	0.00069	0.01816	0.00152
GXT_22812174	ENSCAFT00000006426	GXL_262320	GRIN2D	2906	NC_000019	chr19	+	48907983	48946098	2247	11	0.000451	0.00335	-1.06	down	24	7	27	28	18	42	0.00514	0.0021	0.00418	0.00606	0.0082	0.00887	0.00381	0.00127	0.00771	0.0012
GXT_22812203	ENSCAFT00000026151	GXL_692798	IL27RA/RLN3	-2	NC_000019	chr19	+	14141534	14161652	1453	10	1.29e-11	3.09e-10	-1.26	down	22	32	27	64	34	62	0.00686	0.01253	0.00622	0.01994	0.0245	0.01885	0.00854	0.00284	0.0211	0.00245
GXT_22812269	ENSCAFT00000038680	GXL_241219	FRZB	2487	NC_000002	chr2	-	183699287	183707275	745	4	8.54e-147	1.13e-143	-1.89	down	129	89	188	466	221	461	0.08275	0.07736	0.08757	0.29351	0.33495	0.28851	0.08256	0.00417	0.30566	0.02081
GXT_22812271	ENSCAFT00000018819	GXL_57953	NOSTRIN	115677	NC_000002	chr2	+	169667002	169721570	1615	16	0.00903	0.0427	-1.19	down	3	7	7	12	7	12	0.00097	0.00209	0.00134	0.00338	0.0038	0.00308	0.00147	0.00047	0.00342	0.0003
GXT_22812313	ENSCAFT00000004180	GXL_42223	EPCAM	4072	NC_000002	chr2	+	47599261	47613752	922	9	4.63e-05	0.000451	#NAME?	down	0	0	0	3	2	8	0	0	0	0.00165	0.00266	0.00432	0	0	0.00288	0.0011
GXT_22812330	ENSCAFT00000006362	GXL_78393	PRKAR2B	5577	NC_000007	chr7	+	106703316	106800027	987	11	1.12e-07	1.76e-06	-1.93	down	9	5	10	27	16	24	0.00425	0.00342	0.00308	0.01256	0.0199	0.01038	0.00358	0.00049	0.01428	0.00407
GXT_22812370	ENSCAFT00000036757	GXL_34998	TSPAN13	27075	NC_000007	chr7	+	16815507	16823116	601	6	0.00178	0.011	1	up	22	23	36	10	6	16	0.01672	0.02017	0.01898	0.0066	0.01226	0.01243	0.01862	0.00143	0.01043	0.00271
GXT_22812883	ENSECAT00000017598	GXL_228166	IL12RB2	3595	NC_000001	chr1	+	67787283	67861765	2508	14	1.4e-05	0.000154	-2.25	down	3	3	2	17	6	10	0.00042	0.00081	0.00014	0.00336	0.00294	0.00179	0.00046	0.00027	0.0027	0.00066
GXT_22813985	ENSECAT00000020231	GXL_234985	FGF18	8817	NC_000005	chr5	+	170863085	170883809	575	6	0.00249	0.0145	-1.56	down	4	2	3	13	2	9	0.00313	0.00171	0.00119	0.01121	0.00427	0.0078	0.00201	0.00082	0.00776	0.00283
GXT_22814177	ENSECAT00000009311	GXL_75690	APOB	338	NC_000002	chr2	-	21224659	21266427	13509	28	1.36e-26	8.21e-25	-1.06	down	149	118	199	314	131	333	0.00571	0.00589	0.00526	0.01144	0.01168	0.01205	0.00562	0.00026	0.01172	0.00025
GXT_22814269	ENSECAT00000006140	GXL_57963	ITGA6	3655	NC_000002	chr2	+	173330268	173369321	3564	25	4.46e-60	9.45e-58	-1.06	down	337	304	603	811	340	894	0.04459	0.0524	0.05457	0.10133	0.1028	0.11276	0.05052	0.00429	0.10563	0.00508
GXT_22814394	ENSECAT00000010667	GXL_161250	GDPD5	81544	NC_000011	chr11	-	75146174	75173937	2081	14	1.57e-35	1.41e-33	-1.2	down	96	69	125	233	92	201	0.02118	0.0196	0.02014	0.05017	0.05224	0.04477	0.02031	0.00066	0.04906	0.00315
GXT_22814814	ENSGALT00000038336	GXL_90449	CACNB2	783	NC_000010	chr10	+	18439810	18827301	1285	11	0.0022	0.0131	-2.26	down	3	1	0	10	4	2	0.00122	0.00052	0	0.00347	0.00295	0.00078	0.00058	0.0005	0.0024	0.00117
GXT_22814831	ENSGALT00000030813	GXL_67385	NOV	4856	NC_000008	chr8	+	120428978	120431504	525	3	2.17e-29	1.5e-27	-1.9	down	23	17	46	105	36	110	0.02257	0.02049	0.03125	0.09661	0.07579	0.09953	0.02477	0.00466	0.09064	0.01057
GXT_22814881	ENSGALT00000033040	GXL_119544	IGFBP2	3485	NC_000002	chr2	+	217526662	217528819	220	2	2.09e-185	6.02e-182	-1.5	down	663	579	1047	2117	910	2048	1.46046	1.64591	1.61389	4.39798	4.63205	4.24895	1.57342	0.08094	4.42633	0.15768
GXT_22814904	ENSGALT00000039085	GXL_182336	CADPS2	93664	NC_000007	chr7	-	121959306	122003850	1347	5	0.000547	0.00397	-1.13	down	12	9	16	21	12	30	0.00428	0.00451	0.00413	0.00735	0.01094	0.01011	0.00431	0.00016	0.00947	0.00153
GXT_22814905	ENSGALT00000039787	GXL_97727	HGF	3082	NC_000007	chr7	-	81346578	81372789	634	5	9.46e-12	2.29e-10	4.28	up	16	16	27	2	0	1	0.01196	0.01595	0.01254	0.00156	0	0.00079	0.01348	0.00176	0.00078	0.00064
GXT_22815037	ENSMODT00000036227	GXL_925488	DARC/CADM3	-2	NC_000001	chr1	+	159161725	159170712	1102	8	8.82e-73	2.62e-70	-1.94	down	74	55	136	303	140	323	0.03396	0.03272	0.03992	0.1211	0.13369	0.13236	0.03553	0.00314	0.12905	0.00565
GXT_22815242	ENSMODT00000001575	GXL_122630	SAMHD1	25939	NC_000020	chr20	-	35526179	35532652	268	2	1.32e-49	2.05e-47	-1.94	down	43	30	65	160	85	146	0.07336	0.0685	0.0831	0.26271	0.35014	0.24223	0.07499	0.00607	0.28503	0.0468
GXT_22815263	ENSMODT00000002844	GXL_171094	FILIP1L	11259	NC_000003	chr3	-	99567142	99643252	2944	2	2.6e-77	9e-75	1.21	up	609	442	886	266	117	270	0.10851	0.10123	0.10871	0.0448	0.04881	0.04567	0.10615	0.00348	0.04643	0.00172
GXT_22815442	ENSMODT00000039490	GXL_925621	SLC37A1	54020	NC_000021	chr21	+	43955578	43995028	1284	14	0.00964	0.045	-1.32	down	5	3	7	12	5	12	0.00163	0.00105	0.00151	0.00403	0.00382	0.00465	0.0014	0.00025	0.00417	0.00035
GXT_22815482	ENSMODT00000004570	GXL_664422	PTPLAD2	401494	NC_000009	chr9	-	21007036	21029447	709	6	9.21e-11	2.04e-09	-1.24	down	37	18	46	76	34	70	0.02442	0.0158	0.02138	0.04631	0.0527	0.04438	0.02053	0.00357	0.0478	0.00356
GXT_22815486	ENSMODT00000025141	GXL_695653	RALGPS1	9649	NC_000009	chr9	+	129728126	129981048	1739	18	0.00395	0.0215	-1.13	down	9	4	9	18	5	17	0.00241	0.00116	0.00145	0.00455	0.00353	0.0043	0.00167	0.00053	0.00413	0.00043
GXT_22815571	ENSMODT00000039402	GXL_1222421	MMRN2	79812	NC_000010	chr10	-	88696504	88705454	1087	5	0.00131	0.00847	-4.11	down	0	0	1	4	1	6	0	0	0.00033	0.00182	0.00113	0.00275	0.00011	0.00016	0.0019	0.00066
GXT_22815629	ENSMODT00000011602	GXL_125267	KDR	3791	NC_000004	chr4	-	55955035	55984969	3389	25	0.00359	0.0198	#NAME?	down	0	0	0	3	0	4	0	0	0	0.00044	0	0.00059	0	0	0.00034	0.00025
GXT_22816046	ENSMODT00000007743	GXL_123201	SPON1	10418	NC_000011	chr11	+	14004403	14287233	2175	15	5.2e-17	1.87e-15	-1.73	down	23	15	45	88	34	86	0.0053	0.00465	0.00689	0.01834	0.01806	0.01796	0.00561	0.00094	0.01812	0.00016
GXT_22816081	ENSMODT00000025976	GXL_141590	LGR5	8549	NC_000012	chr12	+	71898395	71978502	2211	15	1.04e-09	2.07e-08	-1.54	down	17	14	22	51	24	45	0.0038	0.00366	0.0036	0.01032	0.01084	0.00901	0.00369	8e-05	0.01006	0.00077
GXT_22816288	ENSMMUT00000044446	GXL_106432	RGS7	6000	NC_000001	chr1	-	240938817	241032098	1687	12	0.00245	0.0144	1.02	up	18	12	47	12	3	15	0.00559	0.004	0.00941	0.00323	0.00218	0.00443	0.00633	0.00227	0.00328	0.00092
GXT_22816293	ENSMMUT00000017689	GXL_106511	PCNXL2	80003	NC_000001	chr1	-	233275462	233334777	684	6	0.00622	0.0315	-1.07	down	6	4	13	16	4	19	0.0046	0.00394	0.00606	0.01015	0.00718	0.01311	0.00487	0.00089	0.01015	0.00242
GXT_22816393	ENSMMUT00000001438	GXL_247711	SYNE2	23224	NC_000014	chr14	+	64434427	64545324	10170	45	6.05e-12	1.49e-10	-1.34	down	18	17	29	60	17	60	0.00083	0.00113	0.00099	0.00288	0.00205	0.00284	0.00098	0.00012	0.00259	0.00038
GXT_22816409	ENSMMUT00000009774	GXL_247861	GPR137C	283554	NC_000014	chr14	+	53098756	53101833	610	5	0.00679	0.0339	1.51	up	10	13	11	4	2	4	0.0086	0.00884	0.00652	0.00325	0.00201	0.00327	0.00799	0.00104	0.00284	0.00059
GXT_22816568	ENSMMUT00000023851	GXL_169845	GLYCTK	132158	NC_000003	chr3	+	52324980	52327150	719	4	0.00253	0.0148	-1.11	down	12	10	34	23	22	34	0.00876	0.00938	0.01637	0.01586	0.03341	0.02215	0.0115	0.00345	0.02381	0.00726
GXT_22816892	ENSMMUT00000045777	GXL_190074	ROR2	4920	NC_000009	chr9	-	94484888	94649478	4343	11	2.79e-33	2.27e-31	-1.89	down	17	21	38	74	49	83	0.00198	0.00326	0.00311	0.00845	0.01329	0.00893	0.00278	0.00057	0.01022	0.00218
GXT_22816909	ENSMMUT00000043438	GXL_40604	FRY	10129	NC_000013	chr13	+	32835750	32839757	537	3	0.000279	0.0022	-1.05	down	16	12	25	38	16	30	0.01465	0.0121	0.01505	0.03087	0.03554	0.02428	0.01393	0.00131	0.03023	0.00462
GXT_22816953	ENSMMUT00000022819	GXL_248998	C10orf35	219738	NC_000010	chr10	+	71391233	71393345	1002	3	0.00482	0.0255	-1.07	down	7	4	8	20	3	12	0.00366	0.00269	0.00288	0.00905	0.00368	0.00547	0.00308	0.00042	0.00607	0.00223
GXT_22817259	ENSMMUT00000038530	GXL_184421	PPP1R14A	94274	NC_000019	chr19	-	38741958	38742979	163	2	1.71e-69	4.71e-67	-1.3	down	325	241	407	806	337	757	0.8359	0.82583	0.74276	2.06662	2.13023	1.93081	0.8015	0.04174	2.04255	0.08317
GXT_22817604	ENSMMUT00000004450	GXL_38912	RELT	84957	NC_000011	chr11	+	73102190	73107679	2148	7	2.53e-10	5.34e-09	1.11	up	126	70	137	49	18	60	0.02931	0.02135	0.02169	0.01077	0.00972	0.01345	0.02412	0.00367	0.01131	0.00157
GXT_22817737	ENSMMUT00000039309	GXL_98576	GPR56	9289	NC_000016	chr16	+	57653663	57698893	3598	14	0.000112	0.000983	2.17	up	13	9	13	2	2	1	0.00175	0.0015	0.00131	0.00028	0.00068	0.00014	0.00152	0.00018	0.00037	0.00023
GXT_22817750	ENSMMUT00000025048	GXL_76018	PPL	5493	NC_000016	chr16	-	4933386	4954041	5089	20	2.74e-29	1.88e-27	-1.98	down	27	19	36	122	43	92	0.00254	0.00238	0.00234	0.01132	0.00989	0.00826	0.00242	9e-05	0.00982	0.00125
GXT_22818047	AK169947	GXL_169754	ENTPD3	956	NC_000003	chr3	+	40456250	40469793	1861	6	9.76e-11	2.16e-09	2.72	up	31	13	34	1	1	8	0.00803	0.00459	0.00621	0.00027	0.00066	0.00214	0.00628	0.00141	0.00102	0.00081
GXT_22818084	AK007145	GXL_694612	FAM65B	9750	NC_000006	chr6	-	24805849	24825626	1201	4	2.1e-12	5.35e-11	-2.87	down	5	2	2	22	12	18	0.00175	0.00112	0.0006	0.00866	0.01227	0.00704	0.00116	0.00047	0.00932	0.00219
GXT_22818525	AK008326	GXL_42046	KHK	3795	NC_000002	chr2	+	27320390	27322813	653	4	0.00541	0.028	-1.67	down	4	2	8	9	8	12	0.00321	0.00207	0.00415	0.00683	0.01504	0.00915	0.00314	0.00085	0.01034	0.00346
GXT_22818546	ENSMUST00000106645	GXL_380601	MICALCL	84953	NC_000011	chr11	+	12307180	12380147	2228	10	4.49e-06	5.47e-05	1.8	up	28	16	34	6	2	11	0.00636	0.00454	0.00535	0.00134	0.0011	0.00246	0.00542	0.00074	0.00163	0.00059
GXT_22818768	XM_001513206	GXL_164753	SLIT2	9353	NC_000004	chr4	+	20258295	20620632	4411	36	4.98e-187	1.46e-183	1.85	up	716	665	1211	231	80	281	0.07518	0.08653	0.08711	0.02246	0.0189	0.02766	0.08294	0.00549	0.02301	0.0036
GXT_22819079	XM_510608	GXL_189797	RGMA	56963	NC_000015	chr15	-	93586652	93642458	3414	6	1.75e-16	6.06e-15	-1.45	down	36	21	46	65	43	104	0.00553	0.00415	0.00476	0.00944	0.01546	0.01503	0.00481	0.00056	0.01331	0.00274
GXT_22819405	XM_001146426	GXL_482555	COL6A6	131873	NC_000003	chr3	+	130360520	130396995	4446	8	0.00484	0.0256	2.43	up	7	5	10	2	0	2	0.00083	0.00076	0.00081	0.00022	0	0.00022	0.0008	3e-05	0.00015	0.0001
GXT_22819694	XM_509717	GXL_159026	TMTC4	84899	NC_000013	chr13	-	101255881	101318817	3740	19	1.37e-08	2.4e-07	-1.1	down	24	25	60	76	29	75	0.00323	0.00433	0.00541	0.00923	0.00886	0.00926	0.00432	0.00089	0.00912	0.00018
GXT_22819695	ENSPTRT00000011025	GXL_159026	TMTC4	84899	NC_000013	chr13	-	101256092	101316604	3234	16	1.65e-08	2.84e-07	-1.1	down	23	25	60	75	29	74	0.00357	0.005	0.00626	0.01053	0.01025	0.01055	0.00494	0.0011	0.01044	0.00014
GXT_22819734	ENSPTRT00000005357	GXL_197246	LOXL4	84171	NC_000010	chr10	-	100007553	100021968	3117	13	3e-306	6e-302	-1.83	down	429	367	661	1604	707	1799	0.06815	0.07585	0.07245	0.23915	0.26349	0.27286	0.07215	0.00315	0.2585	0.01421
GXT_22819813	XM_517461	GXL_694361	FREM3	166752	NC_000004	chr4	-	144498456	144624935	7172	10	0.0108	0.0493	-1.85	down	1	1	2	6	0	8	7e-05	9e-05	0.0001	0.00041	0	0.00056	9e-05	1e-05	0.00032	0.00024
GXT_22820065	ENSPTRT00000043870	GXL_189020	OSCAR	126014	NC_000019	chr19	-	54598486	54600446	485	3	0.0047	0.0249	-1.74	down	3	3	4	8	7	9	0.00324	0.00417	0.00298	0.00818	0.01519	0.00822	0.00346	0.00051	0.01053	0.0033
GXT_22820153	ENSPTRT00000045703	GXL_184392	ZNF573	126231	NC_000019	chr19	-	38229394	38262336	1515	3	0.00392	0.0214	-1.07	down	8	6	8	19	5	16	0.00256	0.00267	0.00191	0.006	0.00405	0.00526	0.00238	0.00034	0.0051	0.0008
GXT_22820167	XM_001159303	GXL_184396	COMP	1311	NC_000019	chr19	-	18898300	18899095	235	2	5.33e-67	1.37e-64	-1.01	down	1684	1503	2559	3770	1592	3886	3.34882	3.82986	3.45787	7.02179	7.37665	7.26185	3.54552	0.20593	7.2201	0.14785
GXT_22820277	ENSPTRT00000046859	GXL_693735	REL	5966	NC_000002	chr2	+	61147520	61150117	1383	3	0.00414	0.0224	1.53	up	9	8	15	3	2	3	0.00341	0.0039	0.00392	0.00108	0.00178	0.00108	0.00374	0.00024	0.00131	0.00033
GXT_22820507	XM_001167840	GXL_59577	PDZRN4	29951	NC_000012	chr12	+	41903353	41968391	2964	6	9.15e-05	0.000825	#NAME?	down	0	0	0	9	0	3	0	0	0	0.00117	0	0.0005	0	0	0.00056	0.00048
GXT_23204226	ENST00000366113	GXL_36932	CCL5	6352	NC_000017	chr17	-	34198495	34207797	1244	4	2.89e-06	3.65e-05	2.35	up	26	17	17	5	1	5	0.01096	0.00867	0.00436	0.00199	0.00099	0.0016	0.008	0.00274	0.00153	0.00041
GXT_23204284	ENST00000403352	GXL_3392	FDX1L/ZGLP1	-2	NC_000019	chr19	-	10415751	10420459	1028	6	0.0108	0.0492	-1	down	13	6	12	24	10	13	0.00612	0.00328	0.00422	0.01013	0.01075	0.0063	0.00454	0.00118	0.00906	0.00197
GXT_23204341	ENST00000407385	GXL_189043	KCNN4	3783	NC_000019	chr19	-	44270689	44285119	1948	9	2.11e-05	0.000224	-1.02	down	22	20	44	46	26	59	0.00539	0.00692	0.00779	0.01044	0.01576	0.01407	0.0067	0.00099	0.01342	0.00222
GXT_23204406	ENST00000406414	GXL_249679	RTN4R	65078	NC_000022	chr22	-	20228938	20255838	1846	3	0.00359	0.0198	#NAME?	down	0	0	0	3	0	4	0	0	0	0.00062	0	0.00108	0	0	0.00057	0.00044
GXT_23204459	ENST00000403987	GXL_249763	LIF	3976	NC_000022	chr22	-	30639522	30642728	592	2	5.26e-09	9.61e-08	1.48	up	38	45	66	20	7	17	0.03369	0.05024	0.03999	0.01675	0.01452	0.014	0.04131	0.00682	0.01509	0.00119
GXT_23204522	ENST00000402500	GXL_249668	BAIAP2L2	80115	NC_000022	chr22	-	38480909	38506652	2068	15	6.39e-08	1.03e-06	-1.28	down	21	19	26	53	26	47	0.00482	0.00554	0.00419	0.0115	0.01247	0.00987	0.00485	0.00055	0.01128	0.00107
GXT_23204683	ENST00000404814	GXL_101109	SERPINA1	5265	NC_000014	chr14	-	94844726	94856996	1625	6	0.0106	0.0487	-1.33	down	1	3	4	7	1	11	0.00032	0.00124	0.00067	0.00214	0.00076	0.00337	0.00074	0.00038	0.00209	0.00107
GXT_23204861	ENST00000404690	GXL_29907	DUSP4	1846	NC_000008	chr8	-	29193620	29203046	1835	4	2.03e-28	1.33e-26	-1.93	down	30	26	31	109	50	113	0.00858	0.00955	0.0061	0.02945	0.03347	0.0304	0.00808	0.00145	0.03111	0.00172
GXT_23204942	ENST00000394797	GXL_89699	CHRDL1	91851	NC_000023	chrX	-	109918473	110038993	2413	12	2.57e-46	3.46e-44	-1.65	down	40	39	83	164	57	187	0.00858	0.01018	0.01198	0.0318	0.02728	0.03798	0.01025	0.00139	0.03235	0.00439
GXT_23204983	ENST00000401867	GXL_103335	P4HA2	8974	NC_000005	chr5	-	131527531	131563508	3349	16	1.25e-85	5.24e-83	1.02	up	2670	2215	4055	1418	589	1499	0.36975	0.3948	0.38589	0.18401	0.18872	0.19702	0.38348	0.01037	0.18992	0.00538
GXT_23205248	ENST00000402414	GXL_75783	TTC32	130502	NC_000002	chr2	-	20096404	20101717	735	2	0.00262	0.0152	-1.17	down	10	4	19	25	9	20	0.00714	0.00367	0.00934	0.01648	0.01503	0.013	0.00672	0.00233	0.01484	0.00143
GXT_23205249	ENST00000407540	GXL_75791	MATN3	4148	NC_000002	chr2	-	20191872	20212455	2526	8	1.41e-19	5.81e-18	-1.05	down	78	46	128	188	65	148	0.01558	0.01201	0.01774	0.03552	0.03013	0.02839	0.01511	0.00236	0.03135	0.00304
GXT_23205314	ENST00000406785	GXL_75598	SLC8A1	6546	NC_000002	chr2	-	40339286	40679209	6111	8	3.31e-59	6.84e-57	1.02	up	710	565	1104	383	152	398	0.06048	0.06117	0.06417	0.03091	0.03014	0.03192	0.06194	0.0016	0.03099	0.00073
GXT_23205315	ENST00000403092	GXL_75598	SLC8A1	6546	NC_000002	chr2	-	40342171	40657443	3167	10	1.34e-46	1.82e-44	1.08	up	346	299	543	190	71	190	0.0566	0.06132	0.06006	0.02952	0.02675	0.02903	0.05933	0.002	0.02843	0.00121
GXT_23205781	ENST00000406395	GXL_382759	GP1BB	2812	NC_000022	chr22	+	19702027	19710797	1973	12	1.9e-18	7.38e-17	-1.02	down	114	93	141	235	101	233	0.02664	0.02942	0.02417	0.05385	0.0577	0.05449	0.02674	0.00214	0.05535	0.00168
GXT_23205782	ENST00000383045	GXL_382759	GP1BB	2812	NC_000022	chr22	+	19705955	19710152	1587	11	4.39e-20	1.86e-18	-1.08	down	96	52	108	174	78	168	0.02611	0.01921	0.02207	0.04714	0.05271	0.04681	0.02246	0.00283	0.04889	0.00271
GXT_23205925	ENST00000406230	GXL_47831	CSF2RB	1439	NC_000022	chr22	+	37318176	37334653	2895	13	0.000961	0.00648	-1.46	down	5	6	9	8	10	23	0.00072	0.00116	0.001	0.00137	0.00424	0.00361	0.00096	0.00018	0.00307	0.00123
GXT_23206075	ENST00000402685	GXL_59577	PDZRN4	29951	NC_000012	chr12	+	41582258	41967692	3111	10	0.000186	0.00154	#NAME?	down	0	0	0	9	0	2	0	0	0	0.00112	0	0.00032	0	0	0.00048	0.00047
GXT_23206219	ENST00000360547	GXL_230287	IL16	3603	NC_000015	chr15	+	81489219	81605102	8338	19	1.56e-21	7.3e-20	-1.2	down	68	52	89	150	63	176	0.00428	0.00392	0.00373	0.00847	0.00904	0.01039	0.00398	0.00023	0.0093	0.00081
GXT_23206392	ENST00000379907	GXL_483765	ADAM32	203102	NC_000008	chr8	+	38965168	39142428	2602	25	0.00571	0.0293	-1.2	down	5	4	9	15	4	15	0.00101	0.00104	0.00111	0.00229	0.00142	0.00268	0.00105	4e-05	0.00213	0.00053
GXT_23206475	ENST00000344866	GXL_185059	ASS1	445	NC_000009	chr9	+	133320349	133376634	1447	14	5.72e-82	2.19e-79	-1.64	down	289	200	343	864	379	795	0.09003	0.08221	0.07575	0.26023	0.29025	0.2406	0.08266	0.00584	0.26369	0.02042
GXT_23206748	ENST00000297445	GXL_1235853	SUN1/GET4	-2	NC_000007	chr7	+	856252	914539	4089	22	1.62e-59	3.38e-57	-1.11	down	913	647	1288	1973	831	2028	0.10946	0.10052	0.10617	0.22131	0.23322	0.23114	0.10538	0.00369	0.22856	0.00519
GXT_23206800	ENST00000404625	GXL_35100	IL6	3569	NC_000007	chr7	+	22765503	22771621	1527	6	1.41e-43	1.74e-41	1.51	up	148	109	220	46	24	59	0.04467	0.04548	0.04897	0.01365	0.01846	0.01827	0.04637	0.00187	0.01679	0.00222
GXT_23206836	ENST00000393491	GXL_78271	FOXP2	93986	NC_000007	chr7	+	114055052	114331092	3412	16	0.00394	0.0215	-1.33	down	5	3	12	14	6	17	0.00077	0.00059	0.00122	0.00174	0.00181	0.00204	0.00086	0.00026	0.00186	0.00013
GXT_23206871	ENST00000405335	GXL_49472	RNF32	140545	NC_000007	chr7	+	156433478	156469789	1938	10	0.00477	0.0252	-1.27	down	2	5	8	15	4	11	0.00054	0.00174	0.00149	0.00333	0.00253	0.00283	0.00126	0.00052	0.0029	0.00033
GXT_23206872	ENST00000311822	GXL_49472	RNF32	140545	NC_000007	chr7	+	156433573	156469824	1842	9	0.00127	0.00825	-1.47	down	2	6	8	15	7	13	0.00057	0.0022	0.00157	0.0035	0.00467	0.00352	0.00145	0.00067	0.0039	0.00055
GXT_23207082	ENST00000405271	GXL_42223	EPCAM	4072	NC_000002	chr2	+	47572297	47614039	1530	10	0.00119	0.00775	-2.84	down	0	1	2	5	3	8	0	0.00044	0.00047	0.00164	0.00241	0.0026	0.0003	0.00021	0.00222	0.00042
GXT_23207173	ENST00000406610	GXL_925789	PARD3B	117583	NC_000002	chr2	+	205410516	206484886	8174	23	3.1e-58	6.27e-56	-1.24	down	363	258	580	915	387	883	0.02222	0.02095	0.02467	0.05338	0.05587	0.05201	0.02261	0.00154	0.05375	0.0016
GXT_23207875	ENST00000251675	GXL_695062	PLXNA4	91584	NC_000007	chr7	-	131815238	131833415	1035	7	6.05e-06	7.2e-05	-1.38	down	11	9	20	30	14	36	0.00558	0.00558	0.00663	0.01293	0.01661	0.01567	0.00593	0.00049	0.01507	0.00156
GXT_23208082	ENST00000405269	GXL_75598	SLC8A1	6546	NC_000002	chr2	-	40342390	40838193	2965	8	8.03e-25	4.42e-23	1.05	up	332	291	538	191	71	188	0.05798	0.06376	0.06354	0.0317	0.02857	0.03058	0.06176	0.00267	0.03028	0.00129
GXT_23208228	ENST00000404693	GXL_479736	NCAM1	4684	NC_000011	chr11	+	113003650	113146286	3313	19	0.0023	0.0136	-1.13	down	7	7	18	26	9	18	0.00095	0.00122	0.00175	0.00359	0.00296	0.00256	0.00131	0.00033	0.00304	0.00042
GXT_23208270	ENST00000261575	GXL_40604	FRY	10129	NC_000013	chr13	+	32768274	32828531	3748	23	2.91e-20	1.25e-18	-1.06	down	76	57	114	180	67	159	0.01003	0.01007	0.01002	0.0217	0.01785	0.01953	0.01004	2e-05	0.01969	0.00158
GXT_23208335	ENST00000394655	GXL_230287	IL16	3603	NC_000015	chr15	+	81489219	81582277	1741	11	1.12e-06	1.52e-05	-1.56	down	9	9	19	32	17	32	0.00271	0.00271	0.00374	0.00742	0.01135	0.00887	0.00305	0.00049	0.00921	0.00162
GXT_23208336	ENST00000355368	GXL_230287	IL16	3603	NC_000015	chr15	+	81489219	81600519	4111	19	2.89e-15	9.21e-14	-1.22	down	43	31	57	89	42	110	0.00549	0.00456	0.00475	0.00983	0.01206	0.01314	0.00493	0.0004	0.01168	0.00138
GXT_23208379	ENST00000406884	GXL_89853	WWOX	51741	NC_000016	chr16	+	78133676	78198186	516	5	6.56e-05	0.000615	-1.55	down	6	7	13	17	13	26	0.0061	0.00864	0.0077	0.01441	0.03093	0.02027	0.00748	0.00105	0.02187	0.00684
GXT_23208417	ENST00000400466	GXL_664201	TAF4B	6875	NC_000018	chr18	+	23806409	23875183	2346	10	0.00124	0.00806	-1.58	down	3	3	8	15	5	12	0.00067	0.00086	0.00108	0.00275	0.00262	0.00255	0.00087	0.00017	0.00264	8e-05
GXT_23208716	ENST00000407944	GXL_1235853	SUN1/GET4	-2	NC_000007	chr7	+	856252	889326	1105	8	1.14e-51	1.89e-49	-1.21	down	161	119	245	422	148	401	0.07168	0.06773	0.07141	0.1743	0.14787	0.16352	0.07027	0.0018	0.1619	0.01085
GXT_23208736	ENST00000407492	GXL_35100	IL6	3569	NC_000007	chr7	+	22766833	22771621	926	4	5.61e-25	3.12e-23	1.57	up	105	82	164	31	19	38	0.0499	0.05653	0.06037	0.01479	0.02387	0.01901	0.0556	0.00432	0.01922	0.00371
GXT_23208737	ENST00000401630	GXL_35100	IL6	3569	NC_000007	chr7	+	22766843	22771348	765	5	9.39e-24	4.89e-22	1.53	up	122	89	179	41	18	47	0.07177	0.07364	0.07911	0.02398	0.02721	0.02865	0.07484	0.00311	0.02661	0.00195
GXT_23208741	ENST00000404479	GXL_34995	AVL9	23080	NC_000007	chr7	+	32535322	33078516	1392	12	1.87e-19	7.68e-18	1.09	up	169	113	245	88	32	74	0.05553	0.05039	0.05648	0.02758	0.02558	0.02383	0.05413	0.00268	0.02566	0.00153
GXT_23208798	ENST00000407309	GXL_67256	EFR3A	23167	NC_000008	chr8	+	132916359	133025452	4977	23	2.52e-45	3.32e-43	-1.07	down	484	334	817	1151	392	1167	0.04747	0.04145	0.05473	0.1064	0.09103	0.10838	0.04788	0.00543	0.10194	0.00775
GXT_23208840	ENST00000342100	GXL_184892	OLFML2A	169611	NC_000009	chr9	+	127566369	127572691	1044	3	3.31e-34	2.78e-32	-1.31	down	90	70	136	241	109	215	0.04472	0.04232	0.04412	0.11079	0.12198	0.10031	0.04372	0.00102	0.11103	0.00885
GXT_23208990	ENST00000320161	GXL_228197	SGIP1	84251	NC_000001	chr1	+	66999825	67210768	4670	23	8.15e-37	7.75e-35	1.49	up	215	111	268	75	23	73	0.02147	0.01486	0.01841	0.00711	0.00552	0.00693	0.01825	0.0027	0.00652	0.00071
GXT_23208992	ENST00000371036	GXL_228197	SGIP1	84251	NC_000001	chr1	+	66999869	67213982	7273	21	2.94e-35	2.6e-33	1.4	up	220	118	286	83	26	81	0.01411	0.01014	0.01277	0.00511	0.00405	0.005	0.01234	0.00165	0.00472	0.00048
GXT_23208996	ENST00000370062	GXL_693119	NTNG1	22854	NC_000001	chr1	+	107682639	108024092	2916	9	2.85e-05	0.000293	2.3	up	12	11	15	1	2	2	0.00216	0.00231	0.00186	0.00017	0.00084	0.00034	0.00211	0.00019	0.00045	0.00028
GXT_23209084	ENST00000404858	GXL_42166	PLB1	151056	NC_000002	chr2	+	28718986	28866018	4431	57	0.000796	0.00551	-2.14	down	3	1	2	12	3	7	0.00024	0.00015	8e-05	0.00112	0.00083	0.00056	0.00016	7e-05	0.00084	0.00023
GXT_23209198	AK296686	GXL_227949	AKR1C2	1646	NC_000010	chr10	-	5042103	5046053	945	4	4.1e-09	7.59e-08	-1.38	down	19	14	46	53	28	68	0.01022	0.00999	0.01759	0.02623	0.03419	0.03444	0.0126	0.00353	0.03162	0.00381
GXT_23209215	AK300407	GXL_197067	SORBS1	10580	NC_000010	chr10	-	97074321	97321130	2930	25	1.32e-64	3.22e-62	-2.21	down	27	20	39	134	49	137	0.00401	0.00391	0.00424	0.01946	0.01906	0.01954	0.00405	0.00014	0.01935	0.00021
GXT_23209234	AK299398	GXL_197091	PPP1R3C	5507	NC_000010	chr10	-	93389231	93392828	1275	3	3.19e-59	6.6e-57	-1.16	down	830	648	1311	2047	827	2034	0.33989	0.33822	0.36784	0.78941	0.78678	0.78678	0.34865	0.01359	0.78766	0.00124
GXT_23209235	AK299392	GXL_197091	PPP1R3C	5507	NC_000010	chr10	-	93389226	93392746	1373	3	9.27e-62	2.09e-59	-1.16	down	937	725	1404	2290	907	2242	0.3565	0.35189	0.36606	0.82081	0.80216	0.8061	0.35815	0.0059	0.80969	0.00803
GXT_23209240	AK297740	GXL_227900	ITGA8	8516	NC_000010	chr10	-	15559158	15761849	3225	29	1.3e-13	3.65e-12	-1.04	down	61	46	92	132	54	137	0.00846	0.00815	0.00813	0.01734	0.01827	0.01849	0.00825	0.00015	0.01803	0.0005
GXT_23209261	AK304130	GXL_197067	SORBS1	10580	NC_000010	chr10	-	97074492	97143865	1847	14	8.48e-35	7.3e-33	-2.45	down	13	15	20	92	30	102	0.00341	0.00475	0.00352	0.02174	0.01928	0.02238	0.00389	0.00061	0.02113	0.00134
GXT_23209266	AK296830	GXL_227925	EGR2	1959	NC_000010	chr10	-	64573050	64578419	1190	4	0.00817	0.0394	1.14	up	19	6	17	8	3	3	0.00838	0.00279	0.00516	0.00313	0.0031	0.00126	0.00544	0.00229	0.0025	0.00087
GXT_23209312	AK294924	GXL_197067	SORBS1	10580	NC_000010	chr10	-	97074496	97143802	1780	14	2.38e-35	2.1e-33	-2.39	down	13	15	20	91	28	98	0.00354	0.00492	0.00365	0.02228	0.01862	0.02211	0.00404	0.00063	0.021	0.00169
GXT_23209336	AK293822	GXL_1222421	MMRN2	79812	NC_000010	chr10	-	88696123	88717372	2625	6	0.00176	0.0108	-2.08	down	1	1	6	9	4	10	0.0002	0.00026	0.00083	0.0017	0.00187	0.0019	0.00043	0.00028	0.00182	9e-05
GXT_23209379	AK301340	GXL_161196	MMP1	4312	NC_000011	chr11	-	102660651	102668892	1758	10	0.00671	0.0336	Inf	up	3	2	4	0	0	0	0.00049	0.00077	0.00082	0	0	0	0.00069	0.00015	0	0
GXT_23209380	AK293193	GXL_141140	STK33	65975	NC_000011	chr11	-	8413734	8615702	1895	14	0.00744	0.0365	1.72	up	9	7	19	5	0	5	0.00249	0.00213	0.00324	0.00105	0	0.00131	0.00262	0.00046	0.00079	0.00057
GXT_23209392	AK297723	GXL_161196	MMP1	4312	NC_000011	chr11	-	102660899	102668889	1569	10	0.00394	0.0215	Inf	up	4	2	4	0	0	0	0.00088	0.00086	0.00092	0	0	0	0.00089	2e-05	0	0
GXT_23209407	AK298604	GXL_161211	SYTL2	54843	NC_000011	chr11	-	85406078	85430141	1441	11	9.39e-08	1.49e-06	1.26	up	69	41	69	24	9	29	0.02335	0.01731	0.0163	0.00826	0.00767	0.00899	0.01899	0.00311	0.00831	0.00054
GXT_23209432	AK299583	GXL_41477	VWCE	220001	NC_000011	chr11	-	61049970	61062567	883	6	0.000255	0.00204	1.99	up	11	7	14	2	2	1	0.00654	0.00486	0.00491	0.00112	0.00281	0.00056	0.00544	0.00078	0.0015	0.00096
GXT_23209481	AK296740	GXL_161211	SYTL2	54843	NC_000011	chr11	-	85406069	85522184	3059	16	1.36e-13	3.84e-12	1.23	up	128	80	151	53	13	67	0.02095	0.01689	0.01731	0.00843	0.00522	0.01033	0.01838	0.00182	0.00799	0.00211
GXT_23209498	AK296224	GXL_161211	SYTL2	54843	NC_000011	chr11	-	85406129	85522184	3049	19	3.11e-14	9.16e-13	1.29	up	117	79	147	44	15	58	0.01898	0.01636	0.01666	0.00699	0.00564	0.00882	0.01733	0.00117	0.00715	0.0013
GXT_23209534	AK302241	GXL_41477	VWCE	220001	NC_000011	chr11	-	61026096	61041278	1437	9	1.12e-06	1.52e-05	1.63	up	31	36	39	16	4	10	0.01059	0.01595	0.00939	0.00518	0.00342	0.00347	0.01198	0.00285	0.00402	0.00082
GXT_23209572	AK301093	GXL_41671	LPXN	9404	NC_000011	chr11	-	58317734	58343329	1380	5	1.9e-05	0.000203	1.59	up	17	19	46	7	2	14	0.0057	0.00733	0.01021	0.00211	0.00178	0.00397	0.00775	0.00186	0.00262	0.00096
GXT_23209573	AK301037	GXL_161263	CASP1	834	NC_000011	chr11	-	104897273	104905870	1398	8	0.00267	0.0154	-1.15	down	9	7	15	19	11	21	0.00338	0.00289	0.00336	0.00532	0.00703	0.00612	0.00321	0.00023	0.00616	0.0007
GXT_23209578	AK300955	GXL_41671	LPXN	9404	NC_000011	chr11	-	58294820	58345639	1403	9	2.09e-09	3.99e-08	1.41	up	54	43	95	28	6	27	0.01832	0.01824	0.02163	0.00884	0.00525	0.00873	0.0194	0.00158	0.00761	0.00167
GXT_23209611	AK304379	GXL_139760	SCNN1A	6337	NC_000012	chr12	-	6456850	6486523	2360	13	0.000355	0.00272	-1.47	down	9	3	10	22	8	16	0.002	0.00086	0.00138	0.00441	0.00416	0.00295	0.00141	0.00047	0.00384	0.00064
GXT_23209616	AK303202	GXL_193786	MMP19	4327	NC_000012	chr12	-	56230754	56236720	1431	7	8.49e-60	1.78e-57	1.03	up	718	583	1058	399	148	380	0.2503	0.26122	0.25462	0.1317	0.12351	0.12668	0.25538	0.00449	0.1273	0.00337
GXT_23209749	AK303972	GXL_193848	KRT5	3852	NC_000012	chr12	-	52908361	52914178	2130	10	0.00218	0.013	-2.57	down	1	1	2	4	5	7	0.00025	0.00032	0.00034	0.00093	0.00288	0.00164	0.0003	4e-05	0.00182	0.00081
GXT_23209797	AK294909	GXL_139840	LMO3	55885	NC_000012	chr12	-	16703979	16760084	906	6	0.00127	0.00819	-2.24	down	0	2	4	10	4	7	0	0.00149	0.0016	0.00438	0.00542	0.00385	0.00103	0.00073	0.00455	0.00065
GXT_23209806	AK294474	GXL_139840	LMO3	55885	NC_000012	chr12	-	16703317	16758904	1488	4	1.35e-05	0.000149	-2.26	down	0	4	5	15	7	12	0	0.00181	0.00121	0.00433	0.00578	0.00402	0.00101	0.00075	0.00471	0.00077
GXT_23209859	AK300392	GXL_823834	FLT1	2321	NC_000013	chr13	-	28942539	29069265	2663	15	2.86e-14	8.46e-13	1.03	up	122	92	203	53	34	61	0.02206	0.02127	0.02524	0.00961	0.01337	0.01084	0.02286	0.00172	0.01127	0.00157
GXT_23209862	AK304640	GXL_159254	POSTN	10631	NC_000013	chr13	-	38137382	38154713	1005	12	3.09e-158	5.68e-155	1.21	up	4092	2698	5959	1726	691	1929	1.74453	1.48406	1.74612	0.69906	0.69586	0.78158	1.65824	0.12316	0.7255	0.03968
GXT_23209880	AK302967	GXL_159013	SLC25A30	253512	NC_000013	chr13	-	45969619	45992515	1383	9	3.64e-18	1.39e-16	-1.07	down	82	69	167	226	81	213	0.02977	0.03008	0.03891	0.07355	0.06836	0.06987	0.03292	0.00424	0.07059	0.00218
GXT_23209885	AK302787	GXL_159126	HTR2A	3356	NC_000013	chr13	-	47408737	47471050	1481	3	0.00601	0.0306	1	up	26	14	36	18	3	11	0.00899	0.00637	0.00826	0.00601	0.00249	0.0037	0.00787	0.0011	0.00407	0.00146
GXT_23209907	AK300384	GXL_155959	SLC7A8	23428	NC_000014	chr14	-	23595968	23623602	1499	8	5.75e-38	5.74e-36	-1.54	down	90	45	103	214	111	189	0.02871	0.0198	0.0229	0.06684	0.08473	0.05879	0.0238	0.00369	0.07012	0.01084
GXT_23209918	AK301652	GXL_480134	TGM1	7051	NC_000014	chr14	-	24718414	24732386	1581	9	6.29e-06	7.45e-05	-1.31	down	16	8	18	29	13	41	0.00492	0.00341	0.00411	0.00798	0.00932	0.01183	0.00415	0.00062	0.00971	0.0016
GXT_23209924	AK299436	GXL_480134	TGM1	7051	NC_000014	chr14	-	24718322	24732383	2523	16	2.23e-06	2.88e-05	-1.18	down	24	11	24	37	17	53	0.00454	0.00294	0.00344	0.00647	0.00779	0.00975	0.00364	0.00067	0.008	0.00135
GXT_23209926	AK296702	GXL_155959	SLC7A8	23428	NC_000014	chr14	-	23595960	23624620	1772	9	6.46e-36	5.85e-34	-1.55	down	101	44	109	225	118	207	0.02755	0.01637	0.02059	0.05944	0.07621	0.05437	0.0215	0.00461	0.06334	0.00933
GXT_23210024	AK301082	GXL_480213	SERPINA9	327657	NC_000014	chr14	-	94929230	94942564	1563	5	1.81e-24	9.74e-23	1.54	up	111	101	138	44	15	42	0.03625	0.04228	0.03158	0.01364	0.011	0.01307	0.0367	0.00438	0.01257	0.00113
GXT_23210198	AK295153	GXL_779283	BOLA2	552900	NC_000016	chr16	-	29454226	29465589	1287	5	0.00187	0.0114	#NAME?	down	0	0	0	0	2	6	0	0	0	0	0.00095	0.00116	0	0	0.0007	0.0005
GXT_23210225	AK297979	GXL_133460	NQO1	1728	NC_000016	chr16	-	69744630	69760463	1081	5	1.1e-66	2.8e-64	-1.02	down	1864	1293	2639	3852	1574	3835	0.84451	0.76536	0.82527	1.65763	1.6587	1.6587	0.81171	0.0337	1.65834	0.0005
GXT_23210253	AK297125	GXL_133460	NQO1	1728	NC_000016	chr16	-	69744685	69760463	924	4	5.14e-75	1.66e-72	-1.02	down	1709	1167	2416	3511	1418	3498	0.91351	0.81488	0.89031	1.77969	1.76853	1.78171	0.8729	0.04211	1.77664	0.0058
GXT_23210258	AK298896	GXL_133460	NQO1	1728	NC_000016	chr16	-	69744664	69760383	979	5	5.62e-70	1.58e-67	-1	down	1788	1258	2566	3694	1494	3660	0.88708	0.81938	0.87929	1.74293	1.73749	1.73571	0.86192	0.03025	1.73871	0.00307
GXT_23210348	AK300557	GXL_76024	NTAN1	123803	NC_000016	chr16	-	15131731	15149884	1043	9	3.1e-39	3.26e-37	-1.18	down	281	174	384	594	251	642	0.11779	0.09832	0.11528	0.23399	0.25086	0.25896	0.11046	0.00865	0.24794	0.0104
GXT_23210438	AK299518	GXL_36865	MPP2	4355	NC_000017	chr17	-	41955159	41984901	1476	12	4.39e-09	8.1e-08	1.23	up	52	32	78	15	12	22	0.01599	0.01233	0.01552	0.0047	0.00832	0.00709	0.01461	0.00163	0.0067	0.0015
GXT_23210457	AK299321	GXL_36865	MPP2	4355	NC_000017	chr17	-	41954926	41977990	2029	12	1.51e-10	3.26e-09	1.19	up	70	44	111	31	12	34	0.01577	0.01308	0.01681	0.00684	0.00605	0.00761	0.01522	0.00157	0.00683	0.00064
GXT_23210458	AK299286	GXL_36865	MPP2	4355	NC_000017	chr17	-	41954745	41984904	2121	12	8.61e-11	1.91e-09	1.18	up	75	49	122	35	14	35	0.01632	0.01399	0.01795	0.00748	0.00676	0.00751	0.01609	0.00163	0.00725	0.00035
GXT_23210475	AK304360	GXL_35924	ABCA8	10351	NC_000017	chr17	-	66863548	66951504	3367	21	1.15e-78	4.13e-76	-1.35	down	269	202	384	677	301	738	0.03863	0.03646	0.03756	0.09085	0.10026	0.09868	0.03755	0.00089	0.0966	0.00411
GXT_23210478	AK304286	GXL_35924	ABCA8	10351	NC_000017	chr17	-	66882941	66951466	3657	24	5.04e-68	1.32e-65	-1.35	down	303	235	441	781	348	828	0.03992	0.03841	0.03913	0.09585	0.10591	0.10062	0.03915	0.00062	0.10079	0.00411
GXT_23210541	AK295876	GXL_35924	ABCA8	10351	NC_000017	chr17	-	66890182	66951506	3320	22	1.69e-77	5.85e-75	-1.38	down	266	205	387	692	310	746	0.03855	0.03703	0.03804	0.09344	0.10344	0.09992	0.03787	0.00063	0.09893	0.00414
GXT_23210549	AK302793	GXL_36865	MPP2	4355	NC_000017	chr17	-	41954807	41978930	2275	12	6.42e-11	1.44e-09	1.24	up	72	45	119	31	12	35	0.01453	0.01196	0.01626	0.0061	0.0054	0.00701	0.01425	0.00177	0.00617	0.00066
GXT_23210567	AK295311	GXL_36752	EVI2A	2123	NC_000017	chr17	-	29644862	29648702	1511	3	0.00416	0.0225	1.11	up	11	4	25	5	3	4	0.00382	0.00178	0.00598	0.00164	0.00244	0.00132	0.00386	0.00171	0.0018	0.00047
GXT_23210604	AK294564	GXL_36865	MPP2	4355	NC_000017	chr17	-	41954700	41984904	2111	12	8.2e-11	1.83e-09	1.14	up	77	44	123	34	16	32	0.01705	0.01266	0.01821	0.00728	0.00756	0.00693	0.01597	0.00239	0.00726	0.00026
GXT_23210703	AK302444	GXL_70894	MYOM1	8736	NC_000018	chr18	-	3135645	3193921	1901	13	7.72e-07	1.08e-05	-1.31	down	16	6	21	41	7	42	0.00371	0.00213	0.00371	0.00939	0.00452	0.01021	0.00318	0.00074	0.00804	0.00251
GXT_23210729	AK300187	GXL_744401	PSG9	5678	NC_000019	chr19	-	43757631	43773678	1377	6	0.00749	0.0367	3.68	up	2	4	7	0	0	1	0.00076	0.00147	0.00184	0	0	0.00036	0.00136	0.00045	0.00012	0.00017
GXT_23210877	AK303226	GXL_3403	DENND1C	79958	NC_000019	chr19	-	6467509	6481798	2395	21	0.00469	0.0249	-3.99	down	0	0	1	4	1	5	0	0	7e-05	0.00037	0.00023	0.00047	2e-05	3e-05	0.00036	0.0001
GXT_23210879	AK303102	GXL_3391	TLE2	7089	NC_000019	chr19	-	3005539	3029041	1512	15	1.15e-09	2.27e-08	-1.64	down	13	12	16	40	22	37	0.0036	0.00446	0.00311	0.0118	0.01543	0.0104	0.00372	0.00056	0.01254	0.00212
GXT_23210882	AK295923	GXL_925270	ZNF442	79973	NC_000019	chr19	-	12460397	12476455	1906	3	0.00424	0.0229	1.13	up	18	7	25	8	3	6	0.00495	0.00248	0.00398	0.00208	0.00193	0.00157	0.0038	0.00102	0.00186	0.00021
GXT_23210935	AK294226	GXL_189105	SLC17A7	57030	NC_000019	chr19	-	49933114	49944614	2323	12	0.00832	0.04	-2.1	down	3	0	3	9	4	4	0.00068	0	0.00047	0.00192	0.00159	0.00086	0.00038	0.00028	0.00146	0.00044
GXT_23210977	AK293482	GXL_3391	TLE2	7089	NC_000019	chr19	-	2997678	3025614	2492	16	2.08e-12	5.32e-11	-1.45	down	17	21	24	58	25	57	0.00316	0.00487	0.00319	0.01054	0.01035	0.01009	0.00374	0.0008	0.01033	0.00018
GXT_23210982	AK293407	GXL_3391	TLE2	7089	NC_000019	chr19	-	2997810	3029612	2108	18	1.97e-12	5.06e-11	-1.56	down	17	21	22	56	28	62	0.00348	0.00576	0.00326	0.01175	0.01398	0.01239	0.00417	0.00113	0.01271	0.00094
GXT_23210993	AK304713	GXL_218269	PIK3R3	8503	NC_000001	chr1	-	46508904	46527810	1273	5	1.58e-07	2.44e-06	1.24	up	58	40	68	23	10	23	0.02251	0.02015	0.0176	0.00836	0.00868	0.00822	0.02009	0.002	0.00842	0.00019
GXT_23211011	AK302137	GXL_34958	SLC2A5	6518	NC_000001	chr1	-	9097228	9148510	2092	14	0.0109	0.0496	-1.54	down	3	2	5	11	4	7	0.0005	0.00064	0.00069	0.00237	0.00235	0.00166	0.00061	8e-05	0.00213	0.00033
GXT_23211012	AK302057	GXL_34958	SLC2A5	6518	NC_000001	chr1	-	9097172	9148510	2173	14	0.00532	0.0276	-1.36	down	3	4	5	12	4	10	0.00048	0.00093	0.00067	0.00251	0.00226	0.00205	0.00069	0.00018	0.00227	0.00019
GXT_23211013	AK302049	GXL_218269	PIK3R3	8503	NC_000001	chr1	-	46509333	46642160	1553	10	1.03e-05	0.000116	1.1	up	52	42	71	25	9	30	0.01624	0.01695	0.01444	0.00702	0.00632	0.00898	0.01588	0.00106	0.00744	0.00113
GXT_23211058	AK295783	GXL_34918	PADI2	11240	NC_000001	chr1	-	17394938	17445948	2333	13	0.011	0.05	1.87	up	6	2	10	2	1	0	0.00067	0.00044	0.00124	0.00021	0.00053	0	0.00078	0.00034	0.00025	0.00022
GXT_23211086	AK300477	GXL_34958	SLC2A5	6518	NC_000001	chr1	-	9097173	9109319	1846	10	0.000787	0.00545	-2.38	down	1	1	4	10	4	8	0.00028	0.00012	0.00059	0.00242	0.00266	0.00196	0.00033	0.0002	0.00235	0.00029
GXT_23211120	AK299780	GXL_151158	PLEKHA6	22874	NC_000001	chr1	-	204190383	204191796	1414	1	6.05e-53	1.03e-50	-2.69	down	26	18	41	154	83	172	0.00965	0.00858	0.01048	0.05399	0.07207	0.06059	0.00957	0.00078	0.06222	0.00747
GXT_23211383	AK301600	GXL_151294	GLUL	2752	NC_000001	chr1	-	182353059	182354717	1026	2	5.31e-137	6.14e-134	-1.49	down	875	651	1293	2593	1107	2475	0.43208	0.41138	0.43849	1.20602	1.27944	1.1617	0.42732	0.01157	1.21572	0.04855
GXT_23211386	AK301575	GXL_1227395	MUC1/KRTCAP2	-2	NC_000001	chr1	-	155158440	155161475	1548	6	3.2e-28	2.07e-26	-1.02	down	147	103	182	295	117	291	0.04677	0.04138	0.04085	0.09034	0.08771	0.08816	0.043	0.00267	0.08874	0.00115
GXT_23211463	AK296306	GXL_122527	ACSS1	84532	NC_000020	chr20	-	24988144	25013337	2227	13	4.83e-06	5.86e-05	-1.37	down	8	8	8	25	4	31	0.00165	0.00212	0.0013	0.00512	0.00221	0.00626	0.00169	0.00034	0.00453	0.00171
GXT_23211474	AK304863	GXL_128285	JPH2	57158	NC_000020	chr20	-	42741953	42815803	1816	6	1.7e-07	2.61e-06	-1.41	down	22	7	43	45	28	57	0.00578	0.0026	0.00836	0.01147	0.01893	0.01454	0.00558	0.00236	0.01498	0.00306
GXT_23211476	AK304795	GXL_122630	SAMHD1	25939	NC_000020	chr20	-	35540751	35580111	1394	11	2.81e-212	1.13e-208	-2.06	down	211	147	358	980	404	881	0.06839	0.06046	0.07946	0.30226	0.30752	0.27936	0.06944	0.00779	0.29638	0.01223
GXT_23211489	AK304187	GXL_122630	SAMHD1	25939	NC_000020	chr20	-	35521054	35580075	2121	16	0	0	-1.99	down	396	255	570	1600	680	1433	0.08681	0.07279	0.08649	0.33363	0.34932	0.30459	0.08203	0.00653	0.32918	0.01853
GXT_23211507	AK303375	GXL_122575	C20orf194	25943	NC_000020	chr20	-	3233026	3321608	3112	27	8.27e-32	6.3e-30	-1.08	down	103	97	154	255	106	237	0.01555	0.01678	0.01498	0.03493	0.03494	0.0323	0.01577	0.00075	0.03406	0.00124
GXT_23211584	AK304522	GXL_249853	GGT5	2687	NC_000022	chr22	-	24622030	24641046	1015	4	1.76e-128	1.82e-125	-1.61	down	152	129	211	511	201	497	0.06944	0.07735	0.07071	0.22003	0.22086	0.21927	0.0725	0.00347	0.22005	0.00065
GXT_23211586	AK303463	GXL_693566	USP41	373856	NC_000022	chr22	-	20704868	20726978	1180	8	0.00782	0.038	#NAME?	down	0	0	0	2	0	4	0	0	0	0.00042	0	0.00084	0	0	0.00042	0.00034
GXT_23211593	AK297869	GXL_249853	GGT5	2687	NC_000022	chr22	-	24615623	24641046	2267	13	1.86e-134	2.03e-131	-1.71	down	350	306	473	1156	561	1206	0.07169	0.08056	0.0686	0.22453	0.27486	0.23667	0.07362	0.00507	0.24535	0.02144
GXT_23211602	AK300171	GXL_249735	SYN3	8224	NC_000022	chr22	-	32909440	32926204	974	6	0.00234	0.0138	Inf	up	0	6	5	0	0	0	0	0.00346	0.00169	0	0	0	0.00172	0.00141	0	0
GXT_23211658	AK293683	GXL_249853	GGT5	2687	NC_000022	chr22	-	24615708	24641050	2120	10	8.5e-140	1.01e-136	-1.7	down	341	301	470	1137	540	1180	0.07567	0.08676	0.07459	0.23937	0.28747	0.251	0.07901	0.0055	0.25928	0.02049
GXT_23211696	AK299445	GXL_241273	CHRNA1	1134	NC_000002	chr2	-	175612388	175629189	1980	10	0.00145	0.00923	Inf	up	6	5	2	0	0	0	0.00159	0.0017	0.00036	0	0	0	0.00122	0.00061	0	0
GXT_23211729	AK298315	GXL_89147	NGEF	25791	NC_000002	chr2	-	233743929	233877903	2163	14	1.36e-05	0.00015	-1.55	down	10	5	12	22	11	28	0.00243	0.00125	0.00159	0.00504	0.00568	0.00589	0.00176	0.0005	0.00554	0.00036
GXT_23211786	AK297390	GXL_89147	NGEF	25791	NC_000002	chr2	-	233743925	233792861	2283	13	4.14e-05	0.000408	-1.27	down	15	7	16	28	12	32	0.00345	0.00177	0.00206	0.00609	0.00592	0.00633	0.00243	0.00073	0.00611	0.00017
GXT_23211788	AK299026	GXL_89035	AP1S3	130340	NC_000002	chr2	-	224623199	224702299	830	5	0.00165	0.0103	1.25	up	24	20	40	17	1	15	0.0139	0.01625	0.01525	0.00956	0.00148	0.0078	0.01513	0.00096	0.00628	0.00347
GXT_23211818	AK304108	GXL_89050	PER2	8864	NC_000002	chr2	-	239170183	239198743	1826	12	0.0108	0.0494	1.86	up	7	12	12	7	0	2	0.00201	0.00369	0.00229	0.00163	0	0.00055	0.00266	0.00073	0.00073	0.00068
GXT_23211820	AK298828	GXL_89080	SCG2	7857	NC_000002	chr2	-	224461728	224467078	1943	3	0.00111	0.00732	1.01	up	28	18	45	9	5	22	0.00702	0.00625	0.00828	0.0023	0.00316	0.00564	0.00718	0.00084	0.0037	0.00142
GXT_23211932	AK293203	GXL_89147	NGEF	25791	NC_000002	chr2	-	233744085	233766150	1494	11	0.000138	0.00119	-1.41	down	9	5	7	22	7	18	0.00316	0.00181	0.00145	0.00731	0.0054	0.00553	0.00214	0.00074	0.00608	0.00087
GXT_23211937	AK300989	GXL_75632	RBKS	64080	NC_000002	chr2	-	28032166	28113217	1547	8	0.000214	0.00174	1.11	up	41	36	56	20	5	30	0.01255	0.01351	0.01125	0.00595	0.00359	0.00822	0.01244	0.00093	0.00592	0.00189
GXT_23211938	AK300953	GXL_89147	NGEF	25791	NC_000002	chr2	-	233743971	233877982	2513	16	4.07e-05	0.000402	-1.31	down	14	7	15	27	12	31	0.00292	0.00161	0.0018	0.00533	0.00537	0.00567	0.00211	0.00058	0.00546	0.00015
GXT_23211953	AK299692	GXL_925864	CPOX/CLDND1	-2	NC_000003	chr3	-	98309363	98312454	1029	3	1.34e-14	4.06e-13	-1.06	down	47	39	65	126	36	101	0.02378	0.02511	0.02116	0.05797	0.04065	0.04862	0.02335	0.00164	0.04908	0.00708
GXT_23212001	AK300357	GXL_171157	ADAMTS9	56999	NC_000003	chr3	-	64502378	64599078	2937	19	2.75e-12	6.94e-11	-1.55	down	17	9	26	45	17	58	0.00268	0.00184	0.00283	0.00692	0.00627	0.00899	0.00245	0.00044	0.00739	0.00116
GXT_23212021	AK298001	GXL_171070	FAM107A	11170	NC_000003	chr3	-	58551579	58572795	1387	4	1.58e-37	1.54e-35	-2.57	down	17	16	19	119	47	86	0.0058	0.00778	0.00495	0.04096	0.04017	0.02897	0.00618	0.00119	0.0367	0.00548
GXT_23212094	AK303343	GXL_171157	ADAMTS9	56999	NC_000003	chr3	-	64507157	64601826	3168	21	4.35e-12	1.08e-10	-1.48	down	16	13	29	53	19	57	0.00232	0.00255	0.00285	0.00751	0.00659	0.00827	0.00257	0.00022	0.00746	0.00069
GXT_23212095	AK296160	GXL_171230	SPICE1	152185	NC_000003	chr3	-	113217783	113233689	979	4	0.00508	0.0266	1.26	up	9	21	15	4	4	7	0.00429	0.01022	0.00523	0.00151	0.00251	0.00256	0.00658	0.0026	0.00219	0.00048
GXT_23212113	AK302859	GXL_1231282	HIGD1A	25994	NC_000003	chr3	-	42791310	42814735	818	6	0.00449	0.024	-1.14	down	4	8	9	15	7	16	0.00257	0.00659	0.00353	0.00909	0.00901	0.00884	0.00423	0.00171	0.00898	0.0001
GXT_23212166	AK293981	GXL_181760	ZIC4	84107	NC_000003	chr3	-	147106333	147123307	1481	5	0.00648	0.0326	-2.09	down	2	1	1	10	2	3	0.00071	0.00046	0.00024	0.00335	0.00166	0.00101	0.00047	0.00019	0.00201	0.00099
GXT_23212189	AK304466	GXL_125298	CORIN	10699	NC_000004	chr4	-	47644860	47840123	2417	14	2.34e-122	2.07e-119	-1.41	down	447	332	609	1275	492	1172	0.08862	0.08742	0.08538	0.24062	0.23646	0.22437	0.08714	0.00134	0.23382	0.00689
GXT_23212235	AK298039	GXL_220816	SPARCL1	8404	NC_000004	chr4	-	88394693	88450363	1972	12	0.00869	0.0414	-1.28	down	2	4	3	14	2	5	0.00053	0.00103	0.00037	0.00277	0.00125	0.00126	0.00064	0.00028	0.00176	0.00071
GXT_23212238	AK304628	GXL_220816	SPARCL1	8404	NC_000004	chr4	-	88394785	88450419	1849	11	0.00436	0.0234	-1.44	down	1	4	3	14	2	5	0.00028	0.00109	0.00039	0.00295	0.00133	0.00135	0.00059	0.00036	0.00188	0.00076
GXT_23212239	AK299409	GXL_1232825	ADH1B	125	NC_000004	chr4	-	100228923	100242556	1233	10	1.13e-195	3.53e-192	-2.83	down	55	55	83	453	203	431	0.02297	0.02898	0.02332	0.17155	0.19218	0.16562	0.02509	0.00275	0.17645	0.01138
GXT_23212251	AK304494	GXL_220816	SPARCL1	8404	NC_000004	chr4	-	88394558	88450524	2464	10	0.00278	0.016	-1.44	down	0	5	3	13	2	7	0	0.00109	0.00029	0.00201	0.001	0.00141	0.00046	0.00046	0.00147	0.00041
GXT_23212253	AK304396	GXL_1232825	ADH1B	125	NC_000004	chr4	-	100228958	100242554	1004	9	4.08e-113	3.16e-110	-2.8	down	37	35	62	307	129	300	0.01881	0.02216	0.02108	0.13858	0.14552	0.13841	0.02068	0.0014	0.14084	0.00331
GXT_23212265	AK304038	GXL_125298	CORIN	10699	NC_000004	chr4	-	47597677	47840089	3112	21	5.14e-111	3.75e-108	-1.42	down	483	333	678	1374	521	1252	0.07368	0.067	0.07269	0.19999	0.19029	0.18452	0.07112	0.00294	0.1916	0.00638
GXT_23212266	AK303945	GXL_1232825	ADH1B	125	NC_000004	chr4	-	100228653	100242558	1375	8	4.2e-140	5.01e-137	-2.81	down	73	66	103	574	239	545	0.02744	0.03138	0.02696	0.1991	0.20847	0.19125	0.02859	0.00198	0.19961	0.00704
GXT_23212268	AK296694	GXL_220813	TMEM154	201799	NC_000004	chr4	-	153549144	153601142	998	6	0.00257	0.0149	-1.07	down	10	8	15	24	10	20	0.00473	0.00473	0.00485	0.01192	0.01107	0.00948	0.00477	6e-05	0.01082	0.00101
GXT_23212273	AK303625	GXL_220848	RASGEF1B	153020	NC_000004	chr4	-	82348564	82393058	1795	13	0.0016	0.01	2.85	up	6	6	4	0	1	0	0.00175	0.00225	0.00081	0	0.00068	0	0.0016	0.0006	0.00023	0.00032
GXT_23212287	AK302816	GXL_125298	CORIN	10699	NC_000004	chr4	-	47597499	47792277	3200	21	4.43e-113	3.41e-110	-1.45	down	469	326	654	1372	513	1246	0.06988	0.06411	0.06822	0.19513	0.18114	0.17861	0.0674	0.00243	0.18496	0.00727
GXT_23212290	AK295556	GXL_220834	ADH4	127	NC_000004	chr4	-	100044808	100065448	2151	10	0.00358	0.0198	#NAME?	down	0	0	0	2	0	5	0	0	0	0.00046	0	0.00116	0	0	0.00054	0.00048
GXT_23212315	AK294335	GXL_220816	SPARCL1	8404	NC_000004	chr4	-	88394921	88450361	1927	12	0.00743	0.0365	-1.2	down	2	5	3	14	2	7	0.00054	0.0014	0.00037	0.00283	0.00127	0.00181	0.00077	0.00045	0.00197	0.00065
GXT_23212324	AK301018	GXL_1232825	ADH1B	125	NC_000004	chr4	-	100228650	100242558	1648	11	1.75e-167	3.89e-164	-2.86	down	74	69	110	610	267	579	0.02324	0.02741	0.02337	0.17559	0.19146	0.16864	0.02467	0.00194	0.17856	0.00955
GXT_23212325	AK300956	GXL_220816	SPARCL1	8404	NC_000004	chr4	-	88394638	88450358	2162	12	0.00377	0.0207	-1.4	down	2	4	3	15	2	6	0.00049	0.00094	0.00033	0.00275	0.00114	0.00138	0.00059	0.00026	0.00176	0.00071
GXT_23212342	AK300894	GXL_159324	DMGDH	29958	NC_000005	chr5	-	78317329	78365452	1966	12	0.000321	0.00249	-1.07	down	16	8	30	43	13	29	0.00411	0.00206	0.00496	0.00993	0.00749	0.00735	0.00371	0.00122	0.00826	0.00118
GXT_23212373	AK298063	GXL_103234	CCDC69	26112	NC_000005	chr5	-	150562119	150603653	1164	4	4.95e-36	4.51e-34	-1.31	down	89	62	118	212	90	228	0.03923	0.0348	0.03509	0.08736	0.09181	0.09161	0.03637	0.00202	0.09026	0.00205
GXT_23212676	AK294068	GXL_40039	SLC17A5	26503	NC_000006	chr6	-	74310146	74363696	1129	8	1.1e-142	1.39e-139	-1.95	down	111	105	171	509	204	485	0.04813	0.05128	0.0508	0.1986	0.19989	0.19203	0.05007	0.00139	0.19684	0.00344
GXT_23212845	AK294195	GXL_182395	NRCAM	4897	NC_000007	chr7	-	107789932	107816987	994	4	0.000211	0.00172	-1.2	down	8	6	18	21	6	33	0.00422	0.0041	0.00617	0.00898	0.00741	0.01603	0.00483	0.00095	0.01081	0.00375
GXT_23212862	AK300999	GXL_694803	ADAP1/COX19	-2	NC_000007	chr7	-	938347	995043	1369	11	7.75e-13	2.06e-11	-1.67	down	20	15	18	54	30	47	0.0069	0.00591	0.00422	0.01738	0.02332	0.01564	0.00568	0.00111	0.01878	0.00329
GXT_23212863	AK300859	GXL_694803	ADAP1/COX19	-2	NC_000007	chr7	-	938200	960513	1271	9	6.34e-13	1.7e-11	-1.85	down	16	11	20	55	26	49	0.00601	0.00505	0.00527	0.01911	0.0223	0.01763	0.00544	0.00041	0.01968	0.00195
GXT_23212872	AK300644	GXL_694803	ADAP1/COX19	-2	NC_000007	chr7	-	938114	960510	1297	9	5.4e-14	1.57e-12	-1.94	down	14	12	19	57	29	45	0.00508	0.00547	0.00489	0.0195	0.0247	0.0159	0.00515	0.00024	0.02003	0.00361
GXT_23212915	AK297734	GXL_29994	STC1	6781	NC_000008	chr8	-	23701424	23712319	1736	5	1.23e-137	1.44e-134	-2.56	down	89	68	119	527	192	619	0.0258	0.02595	0.02396	0.14459	0.13267	0.17008	0.02524	0.0009	0.14911	0.0156
GXT_23212916	AK297724	GXL_172743	HAS2	3037	NC_000008	chr8	-	122626102	122653680	1708	5	4.47e-183	1.22e-179	1.75	up	1833	1326	2792	527	233	631	0.54831	0.50397	0.57241	0.1483	0.15954	0.17747	0.54156	0.02834	0.16177	0.01201
GXT_23212928	AK304356	GXL_172591	PTK2	5747	NC_000008	chr8	-	141668504	142011257	4414	32	9.26e-80	3.41e-77	1.15	up	1352	1010	2034	644	232	726	0.14304	0.1371	0.14816	0.06644	0.05904	0.07267	0.14277	0.00452	0.06605	0.00557
GXT_23212968	AK294873	GXL_172591	PTK2	5747	NC_000008	chr8	-	141669434	141810642	2393	23	1.13e-57	2.25e-55	1.25	up	780	590	1207	341	124	414	0.1482	0.14514	0.15676	0.06434	0.05663	0.07444	0.15003	0.00492	0.06514	0.00729
GXT_23212980	AK301557	GXL_172591	PTK2	5747	NC_000008	chr8	-	141669172	141728460	1567	11	7.18e-78	2.54e-75	1.22	up	593	449	870	261	102	295	0.1805	0.17622	0.17844	0.07725	0.07433	0.08571	0.17839	0.00175	0.0791	0.00483
GXT_23213034	AK299691	GXL_31667	C9orf41	138199	NC_000009	chr9	-	77599832	77643189	1010	6	6.96e-07	9.77e-06	1.08	up	55	54	102	34	11	37	0.02622	0.03376	0.03382	0.01571	0.01274	0.01652	0.03127	0.00357	0.01499	0.00162
GXT_23213086	AK303206	GXL_31917	AQP3	360	NC_000009	chr9	-	33442440	33447591	982	4	0.00383	0.021	2.33	up	5	5	7	1	1	0	0.00214	0.00343	0.00221	0.0005	0.00125	0	0.00259	0.00059	0.00058	0.00051
GXT_23213168	AK299174	GXL_89574	GABRE	2564	NC_000023	chrX	-	151125755	151143143	1315	8	0.000413	0.0031	1.41	up	20	20	29	8	3	11	0.00758	0.01026	0.00752	0.00302	0.0028	0.00379	0.00845	0.00128	0.0032	0.00042
GXT_23213202	AK299190	GXL_219429	SCML2	10389	NC_000023	chrX	-	18259243	18306985	1514	8	0.000453	0.00336	1.07	up	27	18	31	6	7	13	0.00901	0.00739	0.00642	0.00196	0.00536	0.0038	0.00761	0.00107	0.00371	0.00139
GXT_23213209	AK297563	GXL_89699	CHRDL1	91851	NC_000023	chrX	-	109919169	110039047	1537	10	1.75e-28	1.15e-26	-1.75	down	22	26	46	112	34	117	0.00717	0.01052	0.01057	0.03342	0.02525	0.03681	0.00942	0.00159	0.03183	0.00485
GXT_23213221	AK304207	GXL_89509	GPC4	2239	NC_000023	chrX	-	132436668	132548587	1835	9	1.16e-47	1.66e-45	-1.12	down	480	418	843	1164	526	1245	0.12592	0.14336	0.15145	0.29253	0.31928	0.30666	0.14024	0.01065	0.30616	0.01093
GXT_23213244	AK295829	GXL_89719	MMGT1	93380	NC_000023	chrX	-	135046837	135056188	1019	5	5.12e-23	2.58e-21	-1.19	down	58	43	76	139	54	129	0.02831	0.02647	0.02411	0.06181	0.06145	0.05815	0.0263	0.00172	0.06047	0.00165
GXT_23213401	AK304688	GXL_691335	C10orf116/AGAP11	-2	NC_000010	chr10	+	88728239	88729265	1027	1	4.63e-40	5.02e-38	-1.41	down	74	59	101	194	108	160	0.03709	0.03696	0.03376	0.09041	0.12387	0.07352	0.03594	0.00154	0.09593	0.02092
GXT_23213402	AK299405	GXL_134228	SFXN3	81855	NC_000010	chr10	+	102792168	102799513	1224	11	5.04e-79	1.83e-76	-1.22	down	280	209	407	738	271	656	0.10254	0.10054	0.10392	0.25224	0.24153	0.22695	0.10233	0.00139	0.24024	0.01036
GXT_23213517	AK300776	GXL_691381	LOC399815	399815	NC_000010	chr10	+	124639246	124657400	1185	6	0.00118	0.0077	2.95	up	9	5	9	0	0	3	0.00398	0.00228	0.00274	0	0	0.00126	0.003	0.00072	0.00042	0.00059
GXT_23213532	AK299865	GXL_479736	NCAM1	4684	NC_000011	chr11	+	113103866	113146170	1182	9	0.00066	0.00468	-2.45	down	0	1	7	13	7	5	0	0.00057	0.00199	0.00503	0.00623	0.00211	0.00085	0.00084	0.00446	0.00173
GXT_23213569	AK297853	GXL_1223647	SDHD	6392	NC_000011	chr11	+	112047098	112088713	1647	11	0.000111	0.000982	-2.23	down	5	0	1	14	2	9	0.00106	0	0.00022	0.00361	0.00149	0.00272	0.00043	0.00046	0.00261	0.00087
GXT_23213610	AK298301	GXL_123167	TRIM34	53840	NC_000011	chr11	+	5618036	5632817	1400	7	1.63e-06	2.16e-05	1.62	up	35	22	51	16	2	13	0.0129	0.01011	0.01303	0.00531	0.00175	0.00462	0.01201	0.00135	0.00389	0.00154
GXT_23213690	AK303693	GXL_924892	C11orf87	399947	NC_000011	chr11	+	109292846	109295384	1428	2	2.48e-85	1.02e-82	1.61	up	578	459	838	214	74	211	0.21157	0.21481	0.21148	0.07396	0.0636	0.07361	0.21262	0.00155	0.07039	0.0048
GXT_23213705	AK296055	GXL_38887	SNX32	254122	NC_000011	chr11	+	65601434	65618768	781	4	0.00302	0.0171	-3.08	down	2	0	0	2	4	6	0.00134	0	0	0.00127	0.00472	0.00384	0.00045	0.00063	0.00328	0.00146
GXT_23213785	AK293827	GXL_38887	SNX32	254122	NC_000011	chr11	+	65601423	65618025	890	3	0.00651	0.0327	-1.75	down	7	0	1	4	5	11	0.00354	0	0.00041	0.00223	0.00552	0.00617	0.00132	0.00158	0.00464	0.00172
GXT_23213801	AK293295	GXL_123167	TRIM34	53840	NC_000011	chr11	+	5618036	5632575	1060	6	2.05e-06	2.67e-05	1.74	up	25	18	44	10	2	10	0.01237	0.01081	0.01483	0.00421	0.00232	0.0047	0.01267	0.00165	0.00374	0.00103
GXT_23213836	AK299529	GXL_59485	PTPRO	5800	NC_000012	chr12	+	15710395	15748340	1452	11	2.58e-07	3.86e-06	-2.42	down	4	2	5	21	8	16	0.00108	0.00075	0.00124	0.00569	0.00592	0.0048	0.00102	0.0002	0.00547	0.00048
GXT_23213848	AK298645	GXL_779200	IRAK3	11213	NC_000012	chr12	+	66583037	66642153	1853	11	5.19e-06	6.26e-05	-1.28	down	22	11	24	40	23	39	0.00566	0.00387	0.00429	0.00946	0.01522	0.00887	0.00461	0.00076	0.01118	0.00286
GXT_23213856	AK294985	GXL_141590	LGR5	8549	NC_000012	chr12	+	71833550	71978363	2822	19	2.72e-09	5.14e-08	-1.43	down	21	14	29	55	27	47	0.00372	0.00287	0.00371	0.00861	0.00957	0.00741	0.00343	0.0004	0.00853	0.00088
GXT_23213859	AK293960	GXL_59616	ACCN2	41	NC_000012	chr12	+	50453670	50475723	1481	11	0.00353	0.0196	-1.12	down	16	9	17	23	19	21	0.00531	0.00364	0.0039	0.00703	0.01104	0.00673	0.00428	0.00073	0.00827	0.00196
GXT_23213870	AK300346	GXL_103602	OAS1	4938	NC_000012	chr12	+	113344857	113354621	950	4	7.86e-05	0.000722	-1.3	down	14	11	29	45	25	19	0.00773	0.00779	0.01027	0.02277	0.02969	0.00891	0.0086	0.00118	0.02046	0.00864
GXT_23213893	AK299388	GXL_380839	EMP1	2012	NC_000012	chr12	+	13349720	13367734	675	5	2.01e-154	3.43e-151	-1.29	down	1804	1462	2707	4697	1992	4896	1.29723	1.30748	1.31948	3.13063	3.27054	3.24879	1.30806	0.00909	3.21665	0.06147
GXT_23213943	AK296159	GXL_103746	BCL7A	605	NC_000012	chr12	+	122459792	122497259	1029	6	3.84e-05	0.000382	-1.11	down	25	8	17	34	14	39	0.01122	0.00524	0.00527	0.01494	0.01551	0.01743	0.00724	0.00281	0.01596	0.00107
GXT_23213989	AK294535	GXL_59577	PDZRN4	29951	NC_000012	chr12	+	41582787	41967920	2810	10	0.000186	0.00154	#NAME?	down	0	0	0	9	0	2	0	0	0	0.00124	0	0.00035	0	0	0.00053	0.00052
GXT_23213991	AK294431	GXL_59577	PDZRN4	29951	NC_000012	chr12	+	41831485	41968134	3041	8	0.000186	0.00154	#NAME?	down	0	0	0	9	0	2	0	0	0	0.00114	0	0.00033	0	0	0.00049	0.00048
GXT_23213997	AK301498	GXL_103602	OAS1	4938	NC_000012	chr12	+	113344823	113354760	1076	4	3.07e-05	0.000313	-1.33	down	13	12	26	45	24	20	0.00634	0.00751	0.00806	0.02011	0.02575	0.00864	0.0073	0.00072	0.01817	0.00712
GXT_23214028	AK293356	GXL_59476	METTL7A	25840	NC_000012	chr12	+	51318803	51324106	720	3	4.67e-19	1.87e-17	-1.14	down	87	73	124	216	96	171	0.06339	0.06696	0.06221	0.14878	0.16374	0.11713	0.06419	0.00202	0.14322	0.01943
GXT_23214038	AK294725	GXL_40655	WASF3	10810	NC_000013	chr13	+	27254288	27260335	1197	4	4.55e-87	1.97e-84	-1.21	down	261	188	390	650	261	605	0.11087	0.10082	0.11157	0.25451	0.25178	0.23678	0.10775	0.00491	0.24769	0.00779
GXT_23214049	AK298021	GXL_40604	FRY	10129	NC_000013	chr13	+	32838805	32869779	1517	9	2.18e-16	7.49e-15	-1.38	down	30	29	45	95	39	81	0.00986	0.012	0.00951	0.02894	0.03156	0.02546	0.01046	0.0011	0.02865	0.0025
GXT_23214063	AK304284	GXL_40596	KLF5	688	NC_000013	chr13	+	73633143	73650122	1702	5	1.09e-46	1.49e-44	-1.13	down	210	145	252	431	176	467	0.06319	0.05587	0.05299	0.12236	0.12337	0.13361	0.05735	0.00429	0.12645	0.00508
GXT_23214066	AK296900	GXL_40596	KLF5	688	NC_000013	chr13	+	73633140	73650441	2059	5	1.42e-41	1.65e-39	-1.12	down	245	167	284	499	195	538	0.06114	0.05339	0.04943	0.11737	0.11331	0.12759	0.05465	0.00486	0.11942	0.00601
GXT_23214091	AK302280	GXL_40596	KLF5	688	NC_000013	chr13	+	73629114	73650129	1401	4	5.74e-56	1.07e-53	-1.25	down	162	111	197	360	144	399	0.05894	0.05151	0.05019	0.12366	0.12183	0.13852	0.05355	0.00385	0.128	0.00747
GXT_23214111	AK299588	GXL_247708	GALNTL1	57452	NC_000014	chr14	+	69726869	69819046	868	6	0.01	0.0465	1.65	up	9	7	17	5	0	5	0.00423	0.00544	0.00493	0.00286	0	0.00287	0.00487	0.0005	0.00191	0.00135
GXT_23214137	AK298465	GXL_247711	SYNE2	23224	NC_000014	chr14	+	64682000	64692576	1730	10	4.23e-12	1.05e-10	-1.42	down	17	16	37	66	17	71	0.00455	0.00546	0.00689	0.01714	0.01206	0.0192	0.00563	0.00096	0.01613	0.003
GXT_23214152	AK297874	GXL_247711	SYNE2	23224	NC_000014	chr14	+	64680898	64692336	1777	11	2.67e-12	6.75e-11	-1.5	down	15	15	34	57	18	72	0.0039	0.00493	0.00621	0.01394	0.01244	0.0188	0.00501	0.00094	0.01506	0.00271
GXT_23214156	AK299316	GXL_692033	BDKRB2	624	NC_000014	chr14	+	96671176	96707944	1600	4	1.29e-13	3.65e-12	1.14	up	106	96	148	49	21	60	0.03475	0.04025	0.03285	0.01503	0.01611	0.01805	0.03595	0.00314	0.0164	0.00125
GXT_23214173	AK298659	GXL_172846	FOS	2353	NC_000014	chr14	+	75745531	75748339	1402	3	1.42e-51	2.35e-49	-1.47	down	132	124	218	433	189	409	0.04824	0.05919	0.05542	0.15084	0.16171	0.14332	0.05428	0.00454	0.15196	0.00755
GXT_23214233	AK293812	GXL_247861	GPR137C	283554	NC_000014	chr14	+	53066894	53102296	1202	5	0.00035	0.00269	1.29	up	28	19	30	12	4	10	0.01222	0.00785	0.00902	0.00495	0.00306	0.00414	0.0097	0.00185	0.00405	0.00077
GXT_23214300	AK298156	GXL_4981	C15orf23	90417	NC_000015	chr15	+	40675196	40686373	1305	8	4.34e-44	5.44e-42	-1.27	down	231	148	317	551	226	534	0.08372	0.06757	0.07955	0.18612	0.19427	0.18529	0.07695	0.00685	0.18856	0.00405
GXT_23214382	AK301887	GXL_4981	C15orf23	90417	NC_000015	chr15	+	40674922	40686260	1528	9	1.43e-40	1.59e-38	-1.23	down	235	147	319	546	220	518	0.07141	0.05604	0.0674	0.15384	0.15748	0.14913	0.06495	0.00651	0.15348	0.00342
GXT_23214465	AK298381	GXL_925128	PKD1P1	339044	NC_000016	chr16	+	16437952	16443173	984	5	0.00103	0.00686	-1.47	down	6	2	18	20	9	19	0.0016	0.00069	0.00404	0.0053	0.0057	0.00506	0.00211	0.00141	0.00535	0.00026
GXT_23214503	AK299110	GXL_98576	GPR56	9289	NC_000016	chr16	+	57662609	57697652	2378	14	0.000348	0.00268	2.74	up	7	6	10	0	1	1	0.00132	0.00142	0.00152	0	0.00052	0.00021	0.00142	8e-05	0.00024	0.00021
GXT_23214508	AK297236	GXL_98576	GPR56	9289	NC_000016	chr16	+	57673337	57697880	2688	14	0.00281	0.0161	2.28	up	7	6	8	1	1	1	0.00117	0.00125	0.00108	0.00018	0.00046	0.00019	0.00117	7e-05	0.00028	0.00013
GXT_23214525	AK296968	GXL_89940	CDH3	1001	NC_000016	chr16	+	68679204	68732595	2746	15	7.1e-05	0.00066	-1.43	down	4	9	4	17	7	19	0.00076	0.00172	0.00053	0.00289	0.00268	0.00345	0.001	0.00052	0.00301	0.00032
GXT_23214547	AK296143	GXL_316701	IL32	9235	NC_000016	chr16	+	3115640	3119820	1048	6	0.000586	0.00422	3.45	up	10	4	8	1	0	1	0.00348	0.00257	0.00241	0.00047	0	0.00048	0.00282	0.00047	0.00032	0.00022
GXT_23214607	AK294491	GXL_167631	BAIAP3	8938	NC_000016	chr16	+	1384505	1392422	1409	11	0.00823	0.0396	#NAME?	down	0	0	0	2	1	3	0	0	0	0.00029	0.00087	0.00085	0	0	0.00067	0.00027
GXT_23214623	AK293874	GXL_167453	TMC7	79905	NC_000016	chr16	+	18995345	19056461	1617	10	4.36e-08	7.17e-07	1.44	up	40	32	61	12	7	19	0.012	0.01149	0.01289	0.00307	0.00531	0.00554	0.01213	0.00058	0.00464	0.00111
GXT_23214683	AK300554	GXL_45947	ALOX15B	247	NC_000017	chr17	+	7942374	7950975	1755	12	7.92e-24	4.14e-22	-2.26	down	10	5	17	52	17	49	0.00299	0.00192	0.00329	0.01402	0.01088	0.01334	0.00273	0.00059	0.01275	0.00135
GXT_23214688	AK298095	GXL_45947	ALOX15B	247	NC_000017	chr17	+	7942352	7952162	2396	14	1.41e-21	6.62e-20	-2.19	down	12	10	26	78	26	66	0.00263	0.00253	0.00377	0.01565	0.01258	0.0133	0.00298	0.00056	0.01384	0.00131
GXT_23214726	AK300424	GXL_744355	ITGB3/C17orf57	-2	NC_000017	chr17	+	45331263	45421658	2785	18	5.79e-30	4.13e-28	1.17	up	208	184	343	107	33	135	0.0372	0.04119	0.03982	0.0178	0.0135	0.02164	0.0394	0.00166	0.01765	0.00332
GXT_23214919	AK294036	GXL_381737	MYO15A	51168	NC_000017	chr17	+	18057102	18082536	3018	24	0.00378	0.0207	-1.13	down	5	9	6	19	8	10	0.00087	0.00156	0.0006	0.00263	0.00244	0.00149	0.00101	0.0004	0.00219	0.0005
GXT_23214965	AK302593	GXL_664201	TAF4B	6875	NC_000018	chr18	+	23845251	23970249	2402	14	0.000189	0.00156	-1.76	down	3	4	9	20	8	12	0.00066	0.00112	0.0012	0.00372	0.00358	0.00228	0.00099	0.00024	0.00319	0.00065
GXT_23214969	AK295088	GXL_47287	GNAL	2774	NC_000018	chr18	+	11689184	11881289	1493	13	0.00825	0.0397	-3.1	down	1	0	0	5	0	4	0.00035	0	0	0.00166	0	0.001	0.00012	0.00016	0.00089	0.00068
GXT_23214988	AK303076	GXL_47342	APCDD1	147495	NC_000018	chr18	+	10468465	10488468	1921	4	1.01e-11	2.43e-10	1.62	up	60	60	73	27	7	21	0.01611	0.0207	0.01335	0.00697	0.00447	0.00493	0.01672	0.00303	0.00546	0.00109
GXT_23215010	AK300743	GXL_47342	APCDD1	147495	NC_000018	chr18	+	10454627	10488342	2010	6	1.43e-11	3.42e-10	1.58	up	62	58	68	27	7	21	0.01592	0.01911	0.01186	0.00666	0.00428	0.00471	0.01563	0.00297	0.00522	0.00104
GXT_23215081	AK299699	GXL_382179	HIF3A	64344	NC_000019	chr19	+	46807106	46841795	2101	13	7.56e-06	8.81e-05	-3.15	down	1	1	2	10	6	10	0.00025	0.00032	0.00034	0.00198	0.00331	0.00213	0.0003	4e-05	0.00247	0.00059
GXT_23215090	AK298054	GXL_262526	ICAM1	3383	NC_000019	chr19	+	10381797	10396256	1820	7	1.53e-65	3.81e-63	-1.45	down	104	87	176	330	140	307	0.02825	0.03112	0.03354	0.08524	0.08731	0.07992	0.03097	0.00216	0.08416	0.00311
GXT_23215100	AK304747	GXL_382179	HIF3A	64344	NC_000019	chr19	+	46801651	46828851	1486	11	2.96e-06	3.73e-05	-3.41	down	1	1	1	8	6	11	0.00035	0.00045	0.00024	0.002	0.00413	0.00335	0.00035	9e-05	0.00316	0.00088
GXT_23215104	AK297828	GXL_382179	HIF3A	64344	NC_000019	chr19	+	46801647	46843166	2250	14	1.15e-07	1.8e-06	-3.61	down	1	1	2	11	10	12	0.00023	0.0003	0.00032	0.00207	0.00527	0.00243	0.00028	4e-05	0.00326	0.00143
GXT_23215130	AK298983	GXL_262526	ICAM1	3383	NC_000019	chr19	+	10381817	10396256	1644	7	1.15e-70	3.27e-68	-1.46	down	94	80	166	306	130	285	0.02872	0.03158	0.03493	0.08773	0.08994	0.08272	0.03174	0.00254	0.0868	0.00302
GXT_23215175	AK303606	GXL_382046	FSD1	79187	NC_000019	chr19	+	4304658	4311574	1507	6	9.55e-05	0.000856	#NAME?	down	0	0	0	7	3	2	0	0	0	0.00219	0.00244	0.00066	0	0	0.00176	0.00079
GXT_23215200	AK295523	GXL_382046	FSD1	79187	NC_000019	chr19	+	4304657	4311128	1073	6	0.00477	0.0252	-4.31	down	0	0	1	6	3	1	0	0	0.00034	0.00261	0.00343	0.00046	0.00011	0.00016	0.00217	0.00125
GXT_23215256	AK294083	GXL_73902	IZUMO4	113177	NC_000019	chr19	+	2096997	2098829	864	7	0.00215	0.0129	-1	down	8	11	15	24	10	21	0.00486	0.00624	0.00585	0.01262	0.01366	0.00976	0.00565	0.00058	0.01201	0.00165
GXT_23215258	AK301412	GXL_262526	ICAM1	3383	NC_000019	chr19	+	10381769	10396259	1296	5	6.56e-36	5.94e-34	-1.56	down	70	56	121	225	102	232	0.02672	0.02757	0.03288	0.08217	0.09	0.08509	0.02906	0.00273	0.08575	0.00323
GXT_23215286	AK300963	GXL_73958	CFD	1675	NC_000019	chr19	+	859664	863451	1001	5	4.22e-87	1.84e-84	-1.85	down	75	61	91	293	124	232	0.03562	0.03907	0.03104	0.13545	0.13924	0.10598	0.03524	0.00329	0.12689	0.01487
GXT_23215313	AK300401	GXL_228216	CSF1	1435	NC_000001	chr1	+	110458299	110471747	1747	7	2.87e-45	3.76e-43	-1.02	down	473	425	775	1100	467	1113	0.13536	0.15725	0.15301	0.30015	0.3119	0.30553	0.14854	0.00948	0.30586	0.0048
GXT_23215316	AK300020	GXL_228166	IL12RB2	3595	NC_000001	chr1	+	67833553	67862165	1421	5	0.0103	0.0476	-2.09	down	2	1	0	6	2	4	0.00074	0.00047	0	0.00209	0.00173	0.0014	0.0004	0.00031	0.00174	0.00028
GXT_23215357	AK298538	GXL_58994	PADI1	29943	NC_000001	chr1	+	17559778	17571505	1476	5	6.33e-07	8.94e-06	1.54	up	21	26	36	5	7	7	0.00746	0.01141	0.00881	0.00168	0.00582	0.00236	0.00923	0.00164	0.00329	0.00181
GXT_23215374	AK298892	GXL_58994	PADI1	29943	NC_000001	chr1	+	17559850	17571603	1483	5	8.85e-09	1.58e-07	1.62	up	32	30	42	8	8	7	0.01132	0.01338	0.01023	0.00267	0.00662	0.00235	0.01164	0.00131	0.00388	0.00194
GXT_23215398	AK294494	GXL_228166	IL12RB2	3595	NC_000001	chr1	+	67773556	67861518	2454	16	2.14e-05	0.000226	-2.33	down	3	2	2	16	5	9	0.00043	0.00055	0.00015	0.00323	0.0025	0.00162	0.00038	0.00017	0.00245	0.00066
GXT_23215413	AK300446	GXL_57598	NPR1	4881	NC_000001	chr1	+	153652630	153666056	2978	21	2.14e-05	0.000226	#NAME?	down	0	0	0	4	4	6	0	0	0	0.0005	0.00165	0.00073	0	0	0.00096	0.0005
GXT_23215418	AK300361	GXL_228134	LPPR4	9890	NC_000001	chr1	+	99730104	99772959	2413	6	2.23e-05	0.000235	-1.56	down	11	5	4	21	9	20	0.00217	0.00112	0.0006	0.00431	0.00458	0.00413	0.0013	0.00065	0.00434	0.00018
GXT_23215454	AK299839	GXL_779437	TGFB2	7042	NC_000001	chr1	+	218520336	218615240	1344	7	1.94e-55	3.54e-53	-1.15	down	122	117	252	362	126	379	0.04215	0.05216	0.06342	0.12497	0.10048	0.13181	0.05258	0.00869	0.11909	0.01345
GXT_23215520	AK297659	GXL_693119	NTNG1	22854	NC_000001	chr1	+	107752039	108023757	1426	5	0.00245	0.0144	2.54	up	5	7	7	1	1	0	0.00184	0.00331	0.00177	0.00035	0.00086	0	0.00231	0.00071	0.0004	0.00035
GXT_23215527	AK297417	GXL_228134	LPPR4	9890	NC_000001	chr1	+	99730051	99772391	1898	6	2.89e-05	0.000296	-1.78	down	6	5	2	17	8	14	0.00138	0.00142	0.00038	0.00444	0.00517	0.00367	0.00106	0.00048	0.00443	0.00061
GXT_23215539	AK297303	GXL_1228133	KIF26B	55083	NC_000001	chr1	+	245318291	245847679	2839	11	0.00621	0.0314	1.43	up	18	7	12	3	2	6	0.00333	0.00166	0.00153	0.00052	0.00086	0.00105	0.00217	0.00082	0.00081	0.00022
GXT_23215556	AK304385	GXL_120887	FMO2	2327	NC_000001	chr1	+	171154439	171178335	1444	7	0.00204	0.0123	-2.78	down	2	0	1	9	3	3	0.00072	0	0.00025	0.00221	0.00255	0.00069	0.00032	0.0003	0.00182	0.00081
GXT_23215590	AK303946	GXL_228374	CTH	1491	NC_000001	chr1	+	70876925	70905031	1517	11	4.14e-05	0.000408	1.03	up	43	36	51	19	11	19	0.01383	0.01449	0.01086	0.00588	0.00887	0.00578	0.01306	0.00158	0.00684	0.00143
GXT_23215616	AK296533	GXL_693119	NTNG1	22854	NC_000001	chr1	+	107682639	108024092	2856	8	2.85e-05	0.000293	2.3	up	12	11	15	1	2	2	0.0022	0.00236	0.0019	0.00017	0.00086	0.00035	0.00215	0.00019	0.00046	0.00029
GXT_23215619	AK296504	GXL_779437	TGFB2	7042	NC_000001	chr1	+	218520043	218614898	1524	8	5.81e-52	9.73e-50	-1.08	down	136	138	266	394	131	401	0.04096	0.05441	0.05879	0.11853	0.09103	0.12246	0.05139	0.00759	0.11067	0.01398
GXT_23215637	AK296240	GXL_57646	RGS4	5999	NC_000001	chr1	+	163041851	163044921	1228	5	3.62e-183	1e-179	1.87	up	3984	2862	6012	1216	441	1135	1.58613	1.47319	1.65798	0.45192	0.41046	0.43064	1.57243	0.07606	0.43101	0.01693
GXT_23215676	AK295671	GXL_779437	TGFB2	7042	NC_000001	chr1	+	218520197	218615026	1383	8	3.23e-28	2.1e-26	-1.1	down	124	117	250	347	127	363	0.04128	0.05019	0.06086	0.11471	0.09753	0.12175	0.05078	0.008	0.11133	0.01017
GXT_23215680	AK295540	GXL_57646	RGS4	5999	NC_000001	chr1	+	163038661	163044360	983	6	0	0	1.87	up	2659	1903	4030	826	295	739	1.24833	1.15831	1.31467	0.35814	0.32473	0.33065	1.24044	0.06408	0.33784	0.01456
GXT_23215712	AK302310	GXL_228350	CDC14A	8556	NC_000001	chr1	+	100810584	100965021	2065	15	0.00619	0.0314	-1.05	down	14	10	22	17	19	29	0.0033	0.00327	0.00308	0.0036	0.00773	0.00579	0.00322	0.0001	0.00571	0.00169
GXT_23215786	AK301399	GXL_316525	MANEAL	149175	NC_000001	chr1	+	38261080	38266120	1294	4	0.00442	0.0237	-1.3	down	7	3	13	12	8	20	0.00284	0.00156	0.00352	0.0046	0.00664	0.0077	0.00264	0.00081	0.00631	0.00129
GXT_23215811	AK300941	GXL_46989	CYP4B1	1580	NC_000001	chr1	+	47276745	47284514	1310	10	2.23e-05	0.000235	#NAME?	down	0	0	0	6	2	6	0	0	0	0.00189	0.00187	0.00228	0	0	0.00201	0.00019
GXT_23215813	AK300921	GXL_46989	CYP4B1	1580	NC_000001	chr1	+	47264670	47284342	1289	10	0.000196	0.00162	#NAME?	down	0	0	0	7	1	3	0	0	0	0.00231	0.00095	0.00116	0	0	0.00147	0.0006
GXT_23215817	AK300832	GXL_57646	RGS4	5999	NC_000001	chr1	+	163039151	163044636	903	5	5.66e-284	7.3e-280	1.9	up	3149	2263	4672	960	318	893	1.6861	1.56572	1.7255	0.47562	0.39618	0.45417	1.65911	0.06797	0.44199	0.03356
GXT_23215853	AK293275	GXL_58994	PADI1	29943	NC_000001	chr1	+	17559776	17570840	939	6	0.000614	0.00439	1.6	up	12	11	17	2	3	4	0.0067	0.00718	0.00654	0.00106	0.00392	0.00212	0.00681	0.00027	0.00237	0.00118
GXT_23215877	AK299195	GXL_128243	PLCB1	23236	NC_000020	chr20	+	8095100	8769168	3206	28	2.27e-16	7.79e-15	-1.47	down	33	18	51	85	38	89	0.00458	0.00333	0.00473	0.01121	0.01264	0.01197	0.00421	0.00063	0.01194	0.00058
GXT_23215923	AK298976	GXL_664271	TOX2	84969	NC_000020	chr20	+	42667644	42698252	2262	7	0.00202	0.0122	1.12	up	30	21	32	11	4	18	0.00673	0.00566	0.00511	0.00241	0.00217	0.00352	0.00583	0.00067	0.0027	0.00059
GXT_23215949	AK295943	GXL_128390	PRNP	5621	NC_000020	chr20	+	4667105	4681091	1213	3	1.95e-104	1.27e-101	-1.28	down	521	388	746	1353	504	1383	0.22223	0.21107	0.21803	0.5463	0.49522	0.5598	0.21711	0.0046	0.53377	0.02781
GXT_23215963	AK295415	GXL_128390	PRNP	5621	NC_000020	chr20	+	4667105	4681373	1431	3	1.33e-86	5.69e-84	-1.29	down	591	450	867	1557	589	1599	0.21372	0.20733	0.21453	0.53289	0.49073	0.54779	0.21186	0.00322	0.5238	0.02416
GXT_23216001	AK293312	GXL_128390	PRNP	5621	NC_000020	chr20	+	4667105	4681327	1431	3	8.64e-88	3.79e-85	-1.28	down	583	447	867	1534	583	1579	0.21079	0.20592	0.21452	0.52492	0.48559	0.54083	0.21041	0.00352	0.51711	0.02322
GXT_23216030	AK294769	GXL_693482	JAM2	58494	NC_000021	chr21	+	27011910	27087648	1677	9	1.2e-50	1.92e-48	-1.06	down	158	134	273	418	146	376	0.04642	0.04895	0.05597	0.11812	0.10462	0.10716	0.05045	0.00404	0.10997	0.00586
GXT_23216080	AK297038	GXL_825524	BCRP3	644165	NC_000022	chr22	+	25028882	25043727	1457	4	0.00124	0.00806	-1.83	down	3	2	2	9	3	10	0.00108	0.00093	0.0005	0.00306	0.00253	0.00342	0.00084	0.00025	0.003	0.00037
GXT_23216099	AK302993	GXL_47831	CSF2RB	1439	NC_000022	chr22	+	37319799	37334736	2765	12	0.0014	0.00896	-1.32	down	6	6	10	8	9	25	0.00095	0.00122	0.00118	0.00143	0.004	0.00414	0.00112	0.00012	0.00319	0.00125
GXT_23216165	AK301629	GXL_57948	ACVR2A	92	NC_000002	chr2	+	148602086	148685185	1956	11	7.32e-14	2.1e-12	-1.03	down	69	43	92	131	53	146	0.01609	0.01378	0.01644	0.02915	0.03201	0.03361	0.01544	0.00118	0.03159	0.00184
GXT_23216172	AK293581	GXL_925811	EFHD1	80303	NC_000002	chr2	+	233497977	233546545	1002	4	2.34e-30	1.69e-28	-1.82	down	23	20	45	87	45	102	0.01152	0.01211	0.01537	0.04058	0.05143	0.04792	0.013	0.00169	0.04664	0.00452
GXT_23216240	AK299595	GXL_119639	SLC4A3	6508	NC_000002	chr2	+	220497375	220506686	3023	15	3.77e-08	6.25e-07	-1.09	down	32	22	32	62	24	65	0.00493	0.00424	0.00371	0.00942	0.00811	0.00989	0.00429	0.0005	0.00914	0.00075
GXT_23216254	AK299426	GXL_42138	VIT	5212	NC_000002	chr2	+	36923850	37032645	1003	9	4.96e-07	7.11e-06	-1.04	down	31	16	42	58	19	71	0.01464	0.00981	0.01332	0.02351	0.01875	0.02979	0.01259	0.00204	0.02402	0.00452
GXT_23216274	AK299109	GXL_119639	SLC4A3	6508	NC_000002	chr2	+	220492680	220506510	3492	22	5.95e-09	1.08e-07	-1.09	down	38	26	36	77	30	68	0.00511	0.00405	0.00362	0.01015	0.00913	0.00884	0.00426	0.00063	0.00937	0.00056
GXT_23216321	AK303926	GXL_693735	REL	5966	NC_000002	chr2	+	61108709	61149800	2161	10	0.0051	0.0267	1.05	up	19	13	27	10	4	8	0.00413	0.00343	0.00435	0.00184	0.00227	0.00184	0.00397	0.00039	0.00198	0.0002
GXT_23216334	AK296496	GXL_57963	ITGA6	3655	NC_000002	chr2	+	173292146	173369262	3544	26	1.19e-64	2.9e-62	-1.06	down	313	282	569	753	320	835	0.04154	0.04856	0.0518	0.09443	0.09726	0.10584	0.0473	0.00428	0.09918	0.00485
GXT_23216415	AK294436	GXL_57963	ITGA6	3655	NC_000002	chr2	+	173337522	173369241	2989	22	1.72e-79	6.28e-77	-1.13	down	248	229	462	651	270	694	0.03962	0.04675	0.0499	0.09668	0.09676	0.10428	0.04542	0.0043	0.09924	0.00356
GXT_23216454	AK300817	GXL_42140	CRIM1	51232	NC_000002	chr2	+	36744516	36776110	1245	6	2.19e-152	3.45e-149	-1.29	down	1724	1455	2831	4776	1858	5044	0.6754	0.73023	0.76102	1.76512	1.72153	1.87141	0.72222	0.03541	1.78602	0.06295
GXT_23216512	AK297126	GXL_119088	NUDT16P1	152195	NC_000003	chr3	+	131080689	131082532	827	3	0.00183	0.0112	-1.36	down	7	5	4	17	7	10	0.00444	0.00408	0.00175	0.01019	0.01039	0.00602	0.00342	0.00119	0.00887	0.00201
GXT_23216547	AK300388	GXL_232703	RSRC1	51319	NC_000003	chr3	+	157827945	158187521	931	7	3.19e-11	7.36e-10	-1.25	down	31	19	57	85	27	87	0.01506	0.01256	0.01678	0.03609	0.02967	0.03823	0.0148	0.00173	0.03466	0.00364
GXT_23216607	AK297194	GXL_119097	CD200	4345	NC_000003	chr3	+	112052003	112080979	1524	7	1.12e-05	0.000126	-1.14	down	10	11	22	41	6	36	0.00344	0.00486	0.00522	0.0127	0.00483	0.01144	0.00451	0.00077	0.00966	0.00345
GXT_23216658	AK296235	GXL_664299	ITPR1	3708	NC_000003	chr3	+	4841483	4888545	2215	10	7.86e-18	2.95e-16	-1.05	down	101	67	171	207	94	235	0.02297	0.01887	0.02568	0.04333	0.05053	0.04819	0.02251	0.0028	0.04735	0.003
GXT_23216710	AK294594	GXL_664299	ITPR1	3708	NC_000003	chr3	+	4841479	4888147	1793	10	1.73e-19	7.1e-18	-1.06	down	83	54	137	171	74	193	0.02311	0.01843	0.02487	0.04319	0.04832	0.0471	0.02214	0.00272	0.0462	0.00219
GXT_23216725	AK294108	GXL_232579	CLDN11	5010	NC_000003	chr3	+	170136656	170578169	1139	4	0.000635	0.00453	1.95	up	12	10	11	4	2	0	0.00553	0.00533	0.00349	0.00131	0.00216	0	0.00478	0.00092	0.00116	0.00089
GXT_23216726	AK294087	GXL_232579	CLDN11	5010	NC_000003	chr3	+	170139057	170150918	841	3	2.11e-06	2.74e-05	2.05	up	21	10	30	6	2	3	0.0131	0.00751	0.01289	0.00316	0.00292	0.00178	0.01117	0.00259	0.00262	0.0006
GXT_23216760	AK293399	GXL_119097	CD200	4345	NC_000003	chr3	+	112052025	112080650	1016	5	2.64e-05	0.000273	-1.34	down	8	6	14	32	5	24	0.00413	0.00398	0.00498	0.01464	0.00604	0.01128	0.00436	0.00044	0.01065	0.00354
GXT_23216786	AK295305	GXL_33715	ART3	419	NC_000004	chr4	+	76995866	77020404	1227	5	0.000157	0.00133	-2.35	down	1	2	5	12	7	9	0.00043	0.0011	0.00118	0.00444	0.007	0.00325	0.0009	0.00034	0.0049	0.00156
GXT_23216836	AK296962	GXL_383240	SYNPO2	171024	NC_000004	chr4	+	119948563	119953473	2505	2	5.43e-57	1.05e-54	-1.16	down	150	112	220	363	144	342	0.03099	0.02999	0.03159	0.07146	0.07009	0.0674	0.03086	0.00066	0.06965	0.00169
GXT_23216840	AK304031	GXL_33947	KIT	3815	NC_000004	chr4	+	55524124	55605177	3431	21	5.2e-07	7.45e-06	1.31	up	44	41	55	15	9	21	0.00627	0.00727	0.0051	0.00173	0.00286	0.00261	0.00621	0.00089	0.0024	0.00048
GXT_23216873	AK295340	GXL_175098	FAM149A	25854	NC_000004	chr4	+	187065643	187079564	1785	9	0.00797	0.0386	-1.26	down	8	3	17	10	11	23	0.00235	0.00113	0.00296	0.0025	0.00691	0.00629	0.00215	0.00076	0.00523	0.00195
GXT_23216924	AK303314	GXL_27441	AFAP1L1	134265	NC_000005	chr5	+	148691717	148719772	1517	11	3.6e-07	5.27e-06	-1.1	down	27	20	47	73	27	55	0.00795	0.00756	0.00977	0.02124	0.02104	0.01708	0.00843	0.00096	0.01979	0.00192
GXT_23216934	AK298308	GXL_6171	BHMT	635	NC_000005	chr5	+	78407632	78427215	1451	8	0.000396	0.003	-2.78	down	0	2	2	6	7	6	0	0.00067	0.0005	0.00137	0.00508	0.00206	0.00039	0.00028	0.00284	0.00161
GXT_23216954	AK300355	GXL_27509	ARHGEF37	389337	NC_000005	chr5	+	148977408	149012273	2472	12	1.27e-11	3.03e-10	-1.33	down	20	29	31	62	36	61	0.00424	0.00764	0.00424	0.01163	0.01689	0.01189	0.00537	0.0016	0.01347	0.00242
GXT_23216989	AK304623	GXL_27406	CCDC99	54908	NC_000005	chr5	+	169010741	169031378	1928	11	1.2e-43	1.49e-41	1.18	up	434	309	602	156	82	226	0.11168	0.10282	0.1045	0.03737	0.04967	0.05606	0.10633	0.00384	0.0477	0.00776
GXT_23217100	AK300559	GXL_27509	ARHGEF37	389337	NC_000005	chr5	+	148961036	149011994	2431	13	1.02e-09	2.02e-08	-1.27	down	20	29	25	60	32	54	0.00432	0.00777	0.00342	0.01142	0.01515	0.01065	0.00517	0.00187	0.01241	0.00197
GXT_23217282	AK302906	GXL_261223	SLC25A27	9481	NC_000006	chr6	+	46620712	46644513	1612	10	3.75e-08	6.21e-07	-1.52	down	23	5	29	58	23	35	0.00586	0.00209	0.00605	0.01524	0.01605	0.01051	0.00467	0.00182	0.01393	0.00244
GXT_23217301	AK295233	GXL_261223	SLC25A27	9481	NC_000006	chr6	+	46620669	46644930	1708	9	1.53e-09	2.97e-08	-1.55	down	23	6	25	62	19	39	0.00553	0.00237	0.00487	0.01572	0.01225	0.01108	0.00426	0.00136	0.01302	0.00197
GXT_23217350	AK294017	GXL_156083	ZSCAN16	80345	NC_000006	chr6	+	28092387	28095331	1258	3	0.00103	0.00685	-1.39	down	7	3	12	18	7	18	0.00292	0.00161	0.0033	0.0067	0.00619	0.00595	0.00261	0.00072	0.00628	0.00031
GXT_23217421	AK300455	GXL_779662	CREB5	9586	NC_000007	chr7	+	28725621	28859360	1721	7	6.25e-22	3e-20	2.48	up	47	30	66	10	2	10	0.01326	0.01137	0.01281	0.00288	0.00143	0.0026	0.01248	0.00081	0.0023	0.00063
GXT_23217438	AK298077	GXL_35100	IL6	3569	NC_000007	chr7	+	22766766	22769984	1101	3	7.36e-12	1.8e-10	1.6	up	63	40	78	14	9	23	0.02406	0.02294	0.02334	0.00523	0.00958	0.0098	0.02345	0.00046	0.0082	0.0021
GXT_23217439	AK298013	GXL_35100	IL6	3569	NC_000007	chr7	+	22766819	22770076	1493	3	6.46e-16	2.15e-14	1.5	up	105	67	140	32	14	42	0.03212	0.02837	0.03131	0.00965	0.01114	0.01345	0.0306	0.00161	0.01141	0.00156
GXT_23217469	AK298984	GXL_78242	MEST	4232	NC_000007	chr7	+	130131985	130145031	1270	12	8.92e-53	1.52e-50	1.4	up	353	249	511	137	53	147	0.12563	0.11391	0.12568	0.04756	0.04078	0.05029	0.12174	0.00554	0.04621	0.004
GXT_23217481	AK304150	GXL_1235853	SUN1/GET4	-2	NC_000007	chr7	+	888136	913026	1827	15	1.46e-56	2.81e-54	-1.09	down	419	301	605	908	382	924	0.10657	0.10075	0.10551	0.21648	0.2301	0.22265	0.10428	0.00253	0.22308	0.00557
GXT_23217531	AK303034	GXL_33481	C7orf63	79846	NC_000007	chr7	+	89874509	89939684	3188	23	0.000159	0.00135	-1.03	down	15	18	20	35	19	32	0.00247	0.0036	0.00193	0.00498	0.00616	0.00453	0.00267	0.0007	0.00522	0.00069
GXT_23217533	AK302896	GXL_1235853	SUN1/GET4	-2	NC_000007	chr7	+	856280	913248	2379	17	7.29e-49	1.1e-46	-1.1	down	546	404	765	1193	498	1210	0.10932	0.10538	0.10535	0.22359	0.23456	0.22938	0.10668	0.00186	0.22918	0.00448
GXT_23217540	AK302636	GXL_33481	C7orf63	79846	NC_000007	chr7	+	89874529	89939602	3032	23	0.000317	0.00247	-1.01	down	14	18	20	34	19	29	0.00242	0.00378	0.00203	0.00507	0.00648	0.00427	0.00274	0.00075	0.00527	0.00091
GXT_23217553	AK294982	GXL_35036	C7orf41	222166	NC_000007	chr7	+	30174822	30199534	1307	4	1.7e-20	7.41e-19	-1.23	down	78	58	131	210	81	196	0.0289	0.02786	0.03373	0.07321	0.07045	0.06745	0.03016	0.00256	0.07037	0.00235
GXT_23217563	AK294857	GXL_35191	PLEKHA8	84725	NC_000007	chr7	+	30068029	30119543	3050	14	1.14e-12	2.99e-11	1.08	up	123	115	188	75	20	77	0.02005	0.02365	0.02108	0.01187	0.00725	0.01257	0.02159	0.00151	0.01056	0.00236
GXT_23217596	AK301141	GXL_35100	IL6	3569	NC_000007	chr7	+	22766766	22770157	1465	4	6.71e-16	2.23e-14	1.48	up	103	67	133	30	14	43	0.03202	0.02891	0.03018	0.00915	0.01135	0.01405	0.03037	0.00128	0.01152	0.002
GXT_23217657	AK300148	GXL_483765	ADAM32	203102	NC_000008	chr8	+	38965090	39142428	2282	22	0.00133	0.00857	-1.39	down	4	4	8	15	4	16	0.00092	0.00118	0.00111	0.00261	0.00161	0.00327	0.00107	0.00011	0.0025	0.00068
GXT_23217674	AK299207	GXL_42514	GINS4	84296	NC_000008	chr8	+	41386737	41399758	835	6	0.000699	0.00492	1.1	up	37	12	41	15	4	15	0.02032	0.00969	0.01456	0.00772	0.00588	0.00716	0.01486	0.00434	0.00692	0.00077
GXT_23217683	AK297279	GXL_42441	ERLIN2	11160	NC_000008	chr8	+	37594145	37602735	1012	6	2.46e-22	1.2e-20	-1.3	down	58	48	83	150	65	155	0.02342	0.02762	0.02316	0.05966	0.06212	0.06552	0.02473	0.00204	0.06243	0.0024
GXT_23217725	AK295452	GXL_42295	EPB49	2039	NC_000008	chr8	+	21912442	21939197	1569	13	0.00397	0.0216	-1.32	down	5	3	6	14	3	13	0.00134	0.00129	0.00115	0.00411	0.00235	0.00381	0.00126	8e-05	0.00342	0.00077
GXT_23217759	AK294289	GXL_67385	NOV	4856	NC_000008	chr8	+	120428680	120435761	1512	5	1.01e-71	2.93e-69	-1.87	down	79	59	130	322	119	335	0.02672	0.02587	0.03034	0.10264	0.09257	0.10871	0.02764	0.00194	0.10131	0.00666
GXT_23217816	AK298741	GXL_15227	GLIPR2	152007	NC_000009	chr9	+	36136732	36151768	1170	4	3.13e-36	2.89e-34	1.15	up	200	127	260	77	47	68	0.07258	0.0625	0.06573	0.02805	0.04298	0.0238	0.06694	0.0042	0.03161	0.00822
GXT_23217829	AK300470	GXL_12701	CD274	29126	NC_000009	chr9	+	5450542	5466014	1161	6	0.00221	0.0131	2.61	up	7	6	12	1	0	3	0.00226	0.00323	0.0028	0.00043	0	0.00129	0.00276	0.0004	0.00057	0.00054
GXT_23217845	AK304625	GXL_185059	ASS1	445	NC_000009	chr9	+	133320320	133376500	1236	13	2.61e-92	1.3e-89	-1.64	down	230	156	259	682	283	637	0.08658	0.07637	0.06723	0.24332	0.25528	0.22848	0.07673	0.0079	0.24236	0.01096
GXT_23217848	AK299149	GXL_695653	RALGPS1	9649	NC_000009	chr9	+	129677112	129979663	2242	18	0.00551	0.0285	-1.05	down	10	4	13	19	6	19	0.00211	0.0009	0.00177	0.00376	0.00329	0.00378	0.00159	0.00051	0.00361	0.00023
GXT_23217852	AK304531	GXL_15102	MAMDC2	256691	NC_000009	chr9	+	72658909	72841041	2359	14	7.34e-18	2.76e-16	-1.44	down	29	25	24	72	29	82	0.006	0.00657	0.00368	0.01345	0.01457	0.01457	0.00542	0.00125	0.0142	0.00053
GXT_23217861	AK304040	GXL_15102	MAMDC2	256691	NC_000009	chr9	+	72658736	72833444	2217	12	5.63e-18	2.14e-16	-1.37	down	29	20	22	69	20	74	0.00639	0.00578	0.00359	0.01387	0.01108	0.01401	0.00525	0.0012	0.01299	0.00135
GXT_23217897	AK295310	GXL_15243	PSAT1	29968	NC_000009	chr9	+	80912043	80944340	1478	10	3.45e-63	8.05e-61	1.39	up	271	203	434	99	49	118	0.0866	0.08618	0.09704	0.03019	0.03987	0.03639	0.08994	0.00502	0.03548	0.004
GXT_23217898	AK295222	GXL_15243	PSAT1	29968	NC_000009	chr9	+	80911991	80944370	1617	9	3.43e-56	6.46e-54	1.43	up	313	232	482	113	51	135	0.09279	0.09087	0.09942	0.03189	0.03796	0.0385	0.09436	0.00366	0.03612	0.003
GXT_23217967	AK293926	GXL_16180	MAOA	4128	NC_000023	chrX	+	43515548	43604409	2383	16	3.3e-217	1.42e-213	-2.47	down	66	50	111	366	185	400	0.01309	0.01331	0.01562	0.06927	0.08552	0.07462	0.01401	0.00114	0.07647	0.00676
GXT_23218039	AK296156	GXL_827437	KLF8	11279	NC_000023	chrX	+	56258870	56310985	1484	6	0.00336	0.0188	-1.18	down	8	4	7	13	5	18	0.0026	0.00182	0.00146	0.00434	0.00414	0.00555	0.00196	0.00048	0.00468	0.00062
GXT_23218071	AK301927	GXL_745112	AFF2	2334	NC_000023	chrX	+	147800615	148072932	3019	18	1.29e-11	3.1e-10	-1.28	down	30	17	35	56	21	88	0.00469	0.0035	0.00395	0.00854	0.00854	0.01303	0.00405	0.00049	0.01004	0.00212
GXT_23218137	AK309314	GXL_694189	LOC344887	344887	NC_000003	chr3	+	185677761	185697910	1136	5	0.00294	0.0167	-2.21	down	4	1	2	6	8	7	0.00185	0.00059	0.00064	0.00262	0.00865	0.00283	0.00103	0.00058	0.0047	0.00279
GXT_23218166	NM_001122630	GXL_141073	CDKN1C	1028	NC_000011	chr11	-	2904448	2906995	1763	4	9.88e-73	2.93e-70	-2.68	down	21	11	33	126	62	114	0.00565	0.00421	0.00676	0.03431	0.04245	0.03038	0.00554	0.00104	0.03571	0.00503
GXT_23218175	NM_001127702	GXL_101109	SERPINA1	5265	NC_000014	chr14	-	94843084	94857029	3340	6	0.0106	0.0487	-1.33	down	1	3	4	7	1	11	0.00016	0.00061	0.00032	0.00104	0.00037	0.00164	0.00036	0.00019	0.00102	0.00052
GXT_23218254	NM_001128310	GXL_220816	SPARCL1	8404	NC_000004	chr4	-	88394487	88450655	3007	12	0.00499	0.0262	-1.26	down	2	5	3	15	2	7	0.00035	0.0009	0.00024	0.00198	0.00082	0.00116	0.0005	0.00029	0.00132	0.00049
GXT_23218256	NM_001130085	GXL_125095	ABLIM2	84448	NC_000004	chr4	-	7967037	8160559	3542	17	0.00081	0.00559	-2.4	down	2	0	4	10	3	9	0.0003	0	0.00041	0.00098	0.00104	0.00127	0.00024	0.00017	0.0011	0.00012
GXT_23218257	NM_003603	GXL_164638	SORBS2	8470	NC_000004	chr4	-	186506598	186733392	4939	23	1.8e-125	1.77e-122	-1.2	down	1020	829	1476	2646	970	2577	0.10032	0.10614	0.10215	0.24946	0.22825	0.24468	0.10287	0.00243	0.2408	0.00908
GXT_23218290	NM_001122631	GXL_141073	CDKN1C	1028	NC_000011	chr11	-	2904448	2906995	1758	4	6.38e-74	1.98e-71	-2.66	down	21	11	33	126	61	111	0.00567	0.00422	0.00678	0.03441	0.04222	0.03006	0.00556	0.00105	0.03556	0.00503
GXT_23218299	NM_001127704	GXL_101109	SERPINA1	5265	NC_000014	chr14	-	94843084	94857029	3492	7	0.0106	0.0487	-1.33	down	1	3	4	7	1	11	0.00015	0.00058	0.00031	0.00099	0.00035	0.00157	0.00035	0.00018	0.00097	0.0005
GXT_23218300	NM_001127700	GXL_101109	SERPINA1	5265	NC_000014	chr14	-	94843084	94857029	3236	5	0.0106	0.0487	-1.33	down	1	3	4	7	1	11	0.00016	0.00063	0.00033	0.00107	0.00038	0.00169	0.00037	0.00019	0.00105	0.00054
GXT_23218301	NM_001127703	GXL_101109	SERPINA1	5265	NC_000014	chr14	-	94843084	94857029	3495	7	0.0106	0.0487	-1.33	down	1	3	4	7	1	11	0.00015	0.00058	0.00031	0.00099	0.00035	0.00157	0.00035	0.00018	0.00097	0.0005
GXT_23218337	NM_001122646	GXL_72352	FAM178B	51252	NC_000002	chr2	-	97541619	97652301	2685	17	0.00823	0.0396	-1.85	down	2	2	2	9	4	4	0.00039	0.00025	0.00027	0.00148	0.00183	0.00064	0.0003	6e-05	0.00132	0.0005
GXT_23218407	NM_001127380	GXL_1222905	SAA2	6289	NC_000011	chr11	-	18259780	18270221	2043	4	1.61e-14	4.83e-13	-2.14	down	9	6	15	36	22	37	0.00154	0.00132	0.00215	0.00596	0.00888	0.00605	0.00167	0.00035	0.00696	0.00136
GXT_23218424	NM_001127705	GXL_101109	SERPINA1	5265	NC_000014	chr14	-	94843084	94857029	3510	7	0.0106	0.0487	-1.33	down	1	3	4	7	1	11	0.00015	0.00058	0.00031	0.00099	0.00035	0.00156	0.00035	0.00018	0.00097	0.00049
GXT_23218428	NM_001127707	GXL_101109	SERPINA1	5265	NC_000014	chr14	-	94843084	94857029	3300	6	0.0106	0.0487	-1.33	down	1	3	4	7	1	11	0.00016	0.00061	0.00033	0.00105	0.00037	0.00166	0.00037	0.00019	0.00103	0.00053
GXT_23218440	NM_024418	GXL_36039	BZRAP1	9256	NC_000017	chr17	-	56378592	56406152	7514	31	6.14e-11	1.38e-09	-1.01	down	70	51	70	104	67	126	0.00461	0.00422	0.00329	0.00637	0.01062	0.00776	0.00404	0.00055	0.00825	0.00177
GXT_23218453	NR_002188	GXL_152543	GBA	2629	NC_000001	chr1	-	155183616	155197325	2036	13	0.00211	0.0127	1.14	up	26	13	33	13	3	11	0.00609	0.00397	0.0049	0.00292	0.00121	0.00269	0.00499	0.00087	0.00227	0.00076
GXT_23218498	NM_001130083	GXL_125095	ABLIM2	84448	NC_000004	chr4	-	7967037	8160559	3761	20	0.00081	0.00559	-2.4	down	2	0	4	10	3	9	0.00028	0	0.00038	0.00092	0.00098	0.00119	0.00022	0.00016	0.00103	0.00012
GXT_23218500	NM_001130084	GXL_125095	ABLIM2	84448	NC_000004	chr4	-	7967037	8160559	3659	19	0.00081	0.00559	-2.4	down	2	0	4	10	3	9	0.00029	0	0.00039	0.00095	0.00101	0.00123	0.00023	0.00017	0.00106	0.00012
GXT_23218501	NM_001130086	GXL_125095	ABLIM2	84448	NC_000004	chr4	-	7967037	8160559	3503	17	0.00131	0.00843	-2.35	down	2	0	4	10	3	8	0.0003	0	0.00041	0.00099	0.00105	0.00114	0.00024	0.00017	0.00106	6e-05
GXT_23218502	NM_001130087	GXL_125095	ABLIM2	84448	NC_000004	chr4	-	7967037	8160559	3419	16	0.00131	0.00843	-2.35	down	2	0	4	10	3	8	0.00031	0	0.00042	0.00102	0.00108	0.00117	0.00024	0.00018	0.00109	6e-05
GXT_23218568	NM_001127706	GXL_101109	SERPINA1	5265	NC_000014	chr14	-	94843084	94857029	3303	6	0.0106	0.0487	-1.33	down	1	3	4	7	1	11	0.00016	0.00061	0.00033	0.00105	0.00037	0.00166	0.00037	0.00019	0.00103	0.00053
GXT_23218569	NM_001127701	GXL_101109	SERPINA1	5265	NC_000014	chr14	-	94843084	94857029	3532	7	0.0106	0.0487	-1.33	down	1	3	4	7	1	11	0.00015	0.00057	0.00031	0.00098	0.00035	0.00155	0.00034	0.00017	0.00096	0.00049
GXT_23218601	NM_018208	GXL_151196	ETNK2	55224	NC_000001	chr1	-	204100190	204121307	2610	8	1.46e-07	2.26e-06	-1.73	down	12	3	19	45	14	22	0.00221	0.00078	0.00249	0.00779	0.00657	0.00401	0.00183	0.00075	0.00612	0.00158
GXT_23218612	NM_176782	GXL_77759	FAM151A	338094	NC_000001	chr1	-	55074850	55089200	1981	8	0.000226	0.00183	-1.12	down	10	12	24	29	14	34	0.00265	0.00408	0.00438	0.00726	0.00868	0.00845	0.0037	0.00075	0.00813	0.00062
GXT_23218652	NM_001129891	GXL_45379	FAM196B	100131897	NC_000005	chr5	-	169290719	169407744	3548	4	1.19e-34	1.01e-32	1.38	up	213	147	272	87	24	94	0.03105	0.02756	0.02729	0.01201	0.0083	0.0132	0.02863	0.00171	0.01117	0.00209
GXT_23218668	NR_024047	GXL_182514	WNT2	7472	NC_000007	chr7	-	116916685	116963343	2843	5	3.83e-05	0.000381	1.77	up	20	17	27	6	2	8	0.00304	0.00379	0.00343	0.00095	0.00086	0.00123	0.00342	0.00031	0.00101	0.00016
GXT_23218687	NM_021785	GXL_219418	RAI2	10742	NC_000023	chrX	-	17818169	17879457	2226	2	0.00238	0.014	-1.22	down	8	4	7	15	5	17	0.00189	0.00123	0.00114	0.00334	0.00276	0.0038	0.00142	0.00033	0.0033	0.00043
GXT_23218708	NM_017993	GXL_159084	ENOX1	55068	NC_000013	chr13	-	43787661	44361106	3037	17	0.00294	0.0167	-1.17	down	8	7	12	14	10	22	0.00121	0.00133	0.00119	0.00229	0.00362	0.00278	0.00124	6e-05	0.0029	0.00055
GXT_23218709	NM_001127615	GXL_159084	ENOX1	55068	NC_000013	chr13	-	43787661	44203613	2697	17	0.00308	0.0174	-1.2	down	6	7	12	14	9	21	0.00117	0.0015	0.00134	0.00257	0.00364	0.00295	0.00134	0.00013	0.00305	0.00044
GXT_23218727	NM_001128850	GXL_133685	RRAD	6236	NC_000016	chr16	-	66955582	66959439	1477	5	0.00175	0.0108	1.08	up	26	25	34	13	5	16	0.00852	0.0105	0.00832	0.00436	0.00416	0.00506	0.00911	0.00098	0.00453	0.00039
GXT_23218772	NM_001128176	GXL_744718	THRB	7068	NC_000003	chr3	-	24158644	24536266	7466	11	1.94e-07	2.95e-06	-1.56	down	13	10	22	33	23	39	0.00091	0.0009	0.00105	0.00219	0.00378	0.0026	0.00095	7e-05	0.00286	0.00067
GXT_23218776	NM_001128177	GXL_744718	THRB	7068	NC_000003	chr3	-	24158644	24536313	7539	11	5.73e-07	8.15e-06	-1.51	down	13	10	23	33	22	39	0.0009	0.00089	0.00105	0.00217	0.00358	0.00258	0.00095	7e-05	0.00278	0.00059
GXT_23218777	NM_001134649	GXL_171103	EIF4E3	317649	NC_000003	chr3	-	71728440	71803532	6207	8	1.94e-08	3.32e-07	-1.02	down	46	34	77	87	50	99	0.00368	0.00353	0.00442	0.00663	0.00969	0.0077	0.00388	0.00039	0.00801	0.00127
GXT_23218778	NM_001134650	GXL_171103	EIF4E3	317649	NC_000003	chr3	-	71728440	71778269	6085	8	1.94e-08	3.32e-07	-1.02	down	46	34	77	87	50	99	0.00375	0.0036	0.00451	0.00676	0.00988	0.00785	0.00395	0.0004	0.00816	0.00129
GXT_23218779	NM_001134651	GXL_171103	EIF4E3	317649	NC_000003	chr3	-	71728440	71774526	6076	7	3.39e-08	5.64e-07	-1	down	47	34	78	86	50	99	0.0038	0.00361	0.00458	0.00669	0.0099	0.00787	0.004	0.00042	0.00815	0.00133
GXT_23218817	NM_173576	GXL_227923	MKX	283078	NC_000010	chr10	-	27961803	28034778	3639	7	2.45e-55	4.43e-53	-1.64	down	131	100	158	402	168	408	0.01804	0.01706	0.01539	0.05306	0.05536	0.05378	0.01683	0.00109	0.05407	0.00096
GXT_23218888	NR_022011	GXL_5070	SNORD107/PAR-SN	-2	NC_000015	chr15	+	25227141	25228937	1797	1	0.00423	0.0228	1.45	up	12	4	16	3	2	3	0.0035	0.0015	0.00321	0.00083	0.00137	0.00083	0.00274	0.00088	0.00101	0.00025
GXT_23218960	NM_022965	GXL_164857	FGFR3	2261	NC_000004	chr4	+	1795039	1810599	3951	16	0.000442	0.00329	-1.35	down	9	5	11	21	9	19	0.00119	0.00068	0.00101	0.00244	0.0028	0.00219	0.00096	0.00021	0.00248	0.00025
GXT_23218976	NM_020432	GXL_33674	PHTF2	57157	NC_000007	chr7	+	77469447	77586821	4996	17	4.03e-47	5.61e-45	1.06	up	941	663	1432	446	201	478	0.09336	0.08312	0.09839	0.04106	0.04609	0.0451	0.09162	0.00635	0.04408	0.00218
GXT_23218979	NM_001127357	GXL_33674	PHTF2	57157	NC_000007	chr7	+	77469447	77586821	5008	18	4.03e-47	5.61e-45	1.06	up	941	663	1432	446	201	478	0.09313	0.08292	0.09815	0.04096	0.04598	0.04499	0.0914	0.00634	0.04398	0.00217
GXT_23218982	NM_001127358	GXL_33674	PHTF2	57157	NC_000007	chr7	+	77428109	77586821	5085	18	5.73e-47	7.89e-45	1.07	up	962	669	1456	450	204	484	0.09377	0.08246	0.09828	0.04066	0.04586	0.04486	0.0915	0.00665	0.04379	0.00225
GXT_23218984	NM_001127359	GXL_33674	PHTF2	57157	NC_000007	chr7	+	77469447	77553500	2548	9	6.81e-29	4.58e-27	1.02	up	246	184	329	119	53	123	0.04412	0.04295	0.04221	0.01961	0.02276	0.02156	0.04309	0.00079	0.02131	0.0013
GXT_23218988	NM_001127360	GXL_33674	PHTF2	57157	NC_000007	chr7	+	77428109	77553500	2625	9	2.36e-28	1.54e-26	1.04	up	267	190	353	123	56	129	0.04678	0.04324	0.04409	0.01964	0.0232	0.02199	0.0447	0.00151	0.02161	0.00148
GXT_23219003	NM_001128166	GXL_11927	PAK3	5063	NC_000023	chrX	+	110187513	110464173	2577	16	0.000292	0.00229	1.2	up	21	17	44	13	4	11	0.00361	0.00421	0.00575	0.0025	0.00191	0.00213	0.00452	0.0009	0.00218	0.00024
GXT_23219004	NM_001128167	GXL_11927	PAK3	5063	NC_000023	chrX	+	110187513	110464173	2504	15	0.000292	0.00229	1.2	up	21	17	44	13	4	11	0.00372	0.00433	0.00592	0.00257	0.00196	0.00219	0.00466	0.00093	0.00224	0.00025
GXT_23219005	NM_001128168	GXL_11927	PAK3	5063	NC_000023	chrX	+	110366305	110464173	2268	16	0.000386	0.00293	1.17	up	21	16	44	13	4	11	0.00411	0.00449	0.00653	0.00284	0.00217	0.00242	0.00504	0.00106	0.00248	0.00028
GXT_23219008	NM_001128172	GXL_11927	PAK3	5063	NC_000023	chrX	+	110366305	110464173	2223	15	0.000386	0.00293	1.17	up	21	16	44	13	4	11	0.00419	0.00458	0.00666	0.0029	0.00221	0.00246	0.00514	0.00108	0.00252	0.00029
GXT_23219009	NM_001128173	GXL_11927	PAK3	5063	NC_000023	chrX	+	110366305	110464173	2205	15	0.000386	0.00293	1.17	up	21	16	44	13	4	11	0.00422	0.00461	0.00672	0.00292	0.00223	0.00248	0.00518	0.0011	0.00254	0.00029
GXT_23219097	NM_001130046	GXL_119692	CCL20	6364	NC_000002	chr2	+	228678558	228682280	839	4	0.00982	0.0457	1.34	up	13	5	22	6	1	6	0.00688	0.00321	0.00861	0.00328	0.00146	0.00356	0.00623	0.00225	0.00277	0.00093
GXT_23219139	NR_023382	GXL_35069	ZNF815	401303	NC_000007	chr7	+	5862791	5894066	2822	7	0.0043	0.0231	-1.15	down	10	3	12	23	6	14	0.00186	0.00072	0.00154	0.00404	0.00261	0.00221	0.00137	0.00048	0.00295	0.00079
GXT_23219190	NM_001311	GXL_1224938	CRIP1/C14orf80	-2	NC_000014	chr14	+	105953257	105955126	480	6	4.69e-82	1.81e-79	-1.06	down	759	520	961	1514	664	1479	0.64824	0.5974	0.57586	1.26305	1.36883	1.21052	0.60717	0.03035	1.2808	0.06584
GXT_23219261	NM_001134367	GXL_193597	SLC6A6	6533	NC_000003	chr3	+	14444106	14530857	6504	15	1.09e-54	1.94e-52	-1.01	down	420	327	656	944	350	959	0.03284	0.03325	0.03536	0.07034	0.0647	0.07258	0.03382	0.0011	0.06921	0.00332
GXT_23219274	NM_001130067	GXL_175133	TRIM2	23321	NC_000004	chr4	+	154074270	154260474	6792	12	3.15e-48	4.62e-46	-1.11	down	177	137	277	428	169	409	0.01359	0.0131	0.01452	0.03029	0.03027	0.0291	0.01374	0.00059	0.02989	0.00056
GXT_23219297	NR_023360	GXL_67196	CHRAC1	54108	NC_000008	chr8	+	141521415	141527252	2359	2	6.71e-54	1.17e-51	-1.32	down	165	119	191	384	160	414	0.03669	0.03368	0.02926	0.07999	0.0833	0.08696	0.03321	0.00305	0.08342	0.00285
GXT_23219396	NM_001122951	GXL_925488	DARC/CADM3	-2	NC_000001	chr1	+	159175049	159176290	1242	1	8.31e-11	1.85e-09	-2.35	down	5	4	13	29	18	30	0.00192	0.00217	0.00378	0.01158	0.01779	0.01203	0.00262	0.00082	0.0138	0.00283
GXT_23219429	NM_001130016	GXL_33715	ART3	419	NC_000004	chr4	+	76995863	77033955	1572	12	1.1e-06	1.5e-05	-2.49	down	2	3	5	21	10	10	0.00067	0.00129	0.00092	0.00587	0.00703	0.00285	0.00096	0.00025	0.00525	0.00176
GXT_23219430	NM_001130017	GXL_33715	ART3	419	NC_000004	chr4	+	76932337	77033955	1533	10	1.82e-06	2.39e-05	-2.46	down	2	3	5	21	10	9	0.00068	0.00132	0.00095	0.00602	0.00721	0.0026	0.00098	0.00026	0.00528	0.00195
GXT_23219433	NM_000142	GXL_164857	FGFR3	2261	NC_000004	chr4	+	1795039	1810599	4287	18	3.43e-06	4.27e-05	-1.63	down	10	5	11	25	11	27	0.00122	0.00063	0.00093	0.00266	0.00315	0.0029	0.00093	0.00024	0.0029	0.0002
GXT_23219494	NM_001130033	GXL_39008	PLEKHB1	58473	NC_000011	chr11	+	73357223	73373864	2275	7	0.000208	0.0017	-1.63	down	7	3	8	22	8	12	0.00161	0.00089	0.00127	0.00479	0.00432	0.00263	0.00126	0.00029	0.00391	0.00093
GXT_23219495	NM_001130034	GXL_39008	PLEKHB1	58473	NC_000011	chr11	+	73358594	73373864	2121	8	0.000695	0.0049	-1.49	down	8	3	9	22	8	12	0.00198	0.00095	0.00153	0.00514	0.00463	0.00282	0.00149	0.00042	0.0042	0.001
GXT_23219496	NM_001130035	GXL_39008	PLEKHB1	58473	NC_000011	chr11	+	73358594	73373864	2016	7	0.000695	0.0049	-1.49	down	8	3	9	22	8	12	0.00208	0.001	0.00161	0.00541	0.00487	0.00296	0.00156	0.00044	0.00441	0.00105
GXT_23219497	NM_001130036	GXL_39008	PLEKHB1	58473	NC_000011	chr11	+	73359735	73373864	2148	6	0.000208	0.0017	-1.63	down	7	3	8	22	8	12	0.00171	0.00094	0.00135	0.00508	0.00457	0.00278	0.00133	0.00031	0.00414	0.00099
GXT_23219528	NM_001127173	GXL_925488	DARC/CADM3	-2	NC_000001	chr1	+	159141414	159172932	3559	9	1.58e-221	7.62e-218	-1.87	down	229	175	351	889	374	892	0.03331	0.03278	0.034	0.11846	0.12126	0.11998	0.03336	0.0005	0.1199	0.00114
GXT_23219535	NM_000395	GXL_47831	CSF2RB	1439	NC_000022	chr22	+	37309675	37336481	4848	14	0.000821	0.00565	-1.07	down	12	10	16	16	12	35	0.00119	0.00125	0.00112	0.00164	0.00304	0.00339	0.00119	5e-05	0.00269	0.00076
GXT_23219560	NM_001128933	GXL_383240	SYNPO2	171024	NC_000004	chr4	+	119809996	119959669	9935	4	1.09e-57	2.16e-55	-1.2	down	360	282	578	907	373	916	0.0189	0.01906	0.02098	0.04516	0.04597	0.04577	0.01965	0.00095	0.04563	0.00034
GXT_23219561	NM_001128934	GXL_383240	SYNPO2	171024	NC_000004	chr4	+	119809996	119959669	4851	5	8.97e-27	5.46e-25	-1.1	down	157	120	231	381	140	350	0.01676	0.01653	0.01713	0.03874	0.03518	0.03563	0.01681	0.00025	0.03652	0.00158
GXT_23219589	NM_001127608	GXL_15310	FAM189A2	9413	NC_000009	chr9	+	71939488	72007370	2107	11	0.00146	0.00924	-1.06	down	16	4	23	29	10	28	0.00348	0.00128	0.00343	0.00565	0.00583	0.00615	0.00273	0.00103	0.00588	0.00021
GXT_23219625	NM_001134476	GXL_228281	LRRC8B	23507	NC_000001	chr1	+	89990397	90063420	7737	8	7.4e-06	8.63e-05	-1.47	down	9	7	18	35	12	25	0.00061	0.00061	0.00084	0.00218	0.0019	0.00161	0.00069	0.00011	0.0019	0.00023
GXT_23220084	ENSBTAT00000006706	GXL_190074	ROR2	4920	NC_000009	chr9	-	94485944	94499802	2330	5	1.48e-12	3.83e-11	-1.73	down	10	16	29	55	27	58	0.00212	0.00463	0.0045	0.0117	0.0137	0.01144	0.00375	0.00115	0.01228	0.00101
GXT_23220089	ENSBTAT00000023092	GXL_15102	MAMDC2	256691	NC_000009	chr9	+	72723097	72785547	1533	9	1.54e-12	3.99e-11	-1.34	down	21	17	18	55	12	65	0.00663	0.00704	0.00424	0.01585	0.00957	0.01776	0.00597	0.00123	0.01439	0.0035
GXT_23220186	NM_001101965	GXL_175098	FAM149A	25854	NC_000004	chr4	+	187073098	187093283	1605	11	0.01	0.0464	-1.33	down	6	4	15	6	12	22	0.00163	0.00168	0.00302	0.00185	0.00841	0.00669	0.00211	0.00064	0.00565	0.00278
GXT_23220247	XM_585921	GXL_47342	APCDD1	147495	NC_000018	chr18	+	10467445	10489825	3374	5	1.79e-11	4.24e-10	1.61	up	65	64	78	31	7	22	0.00995	0.01259	0.00814	0.00456	0.00255	0.00295	0.01023	0.00183	0.00335	0.00087
GXT_23220265	XM_605757	GXL_384293	FER1L6	654463	NC_000008	chr8	+	124926864	125132302	5907	41	0.00719	0.0355	1.26	up	7	4	13	1	3	1	0.00053	0.00034	0.00073	8e-05	0.00062	8e-05	0.00053	0.00016	0.00026	0.00025
GXT_23220309	XM_613847	GXL_6001	RGMB	285704	NC_000005	chr5	+	98111686	98129972	1865	3	1.98e-129	2.1e-126	1.76	up	1029	847	1483	320	140	323	0.28403	0.3014	0.28284	0.08411	0.09061	0.08571	0.28942	0.00848	0.08681	0.00277
GXT_23220320	XM_608339	GXL_103234	CCDC69	26112	NC_000005	chr5	-	150560942	150607961	3141	10	7.54e-88	3.31e-85	-1.22	down	254	190	386	597	264	647	0.0411	0.03902	0.04213	0.0906	0.09975	0.09862	0.04075	0.00129	0.09632	0.00407
GXT_23220353	ENSBTAT00000002783	GXL_3562	RAB3D	9545	NC_000019	chr19	-	11436074	11448075	660	4	0.00119	0.00777	-1.21	down	9	4	6	12	4	23	0.00636	0.00409	0.00328	0.00676	0.00744	0.01509	0.00458	0.0013	0.00976	0.00378
GXT_23220357	ENSBTAT00000009935	GXL_3560	OLFM2	93145	NC_000019	chr19	-	9964812	9971515	1396	5	0.000198	0.00163	1.86	up	8	14	21	2	2	5	0.00275	0.00594	0.00544	0.00071	0.00176	0.00178	0.00471	0.0014	0.00142	0.0005
GXT_23220462	ENSBTAT00000021211	GXL_694803	ADAP1/COX19	-2	NC_000007	chr7	-	909485	975136	1044	10	4.23e-08	6.97e-07	-1.55	down	16	12	15	40	23	34	0.00703	0.00581	0.0045	0.01646	0.02234	0.01431	0.00578	0.00103	0.0177	0.00339
GXT_23220491	ENSBTAT00000048415	GXL_12473	AGMO	392636	NC_000007	chr7	-	15379744	15599829	1187	12	0.00233	0.0138	Inf	up	4	3	4	0	0	0	0.00088	0.0017	0.00122	0	0	0	0.00127	0.00034	0	0
GXT_23220496	ENSBTAT00000023490	GXL_97727	HGF	3082	NC_000007	chr7	-	81331728	81350164	1192	9	1.3e-15	4.23e-14	3.52	up	33	25	38	3	1	3	0.01232	0.01244	0.00953	0.00125	0.00103	0.00125	0.01143	0.00134	0.00118	0.0001
GXT_23220524	ENSBTAT00000006421	GXL_41671	LPXN	9404	NC_000011	chr11	-	58317257	58331674	573	5	3.99e-05	0.000395	1.4	up	16	17	42	9	4	8	0.01228	0.01412	0.02147	0.00608	0.00857	0.00522	0.01596	0.00397	0.00662	0.00142
GXT_23220578	ENSBTAT00000055144	GXL_139760	SCNN1A	6337	NC_000012	chr12	-	6456187	6465165	2107	9	8.47e-05	0.000772	-1.61	down	7	3	12	21	8	21	0.00174	0.00096	0.00189	0.00471	0.00466	0.00449	0.00153	0.00041	0.00462	9e-05
GXT_23221079	NM_001128097	GXL_227906	CXCL12	6387	NC_000010	chr10	-	44868771	44876329	227	3	5.15e-30	3.68e-28	1.38	up	237	177	355	113	30	103	0.46551	0.45055	0.49873	0.20958	0.13804	0.19034	0.4716	0.02013	0.17932	0.03023
GXT_23221233	ENSCAFT00000021997	GXL_57928	PLEKHA3	65977	NC_000002	chr2	+	179350294	179368614	937	7	3.18e-16	1.08e-14	-1.26	down	30	26	42	74	27	95	0.01426	0.01585	0.01408	0.03338	0.03276	0.04345	0.01473	0.0008	0.03653	0.0049
GXT_23221285	ENSCAFT00000004831	GXL_779662	CREB5	9586	NC_000007	chr7	+	28547231	28858896	1197	9	1.96e-10	4.18e-09	2.77	up	33	19	38	5	0	8	0.01262	0.01034	0.00996	0.00207	0	0.00291	0.01097	0.00117	0.00166	0.00122
GXT_23221313	XM_540922	GXL_41477	VWCE	220001	NC_000011	chr11	-	61026174	61059049	2731	19	4.38e-12	1.09e-10	1.63	up	57	50	77	20	9	18	0.01018	0.01151	0.00913	0.00345	0.00405	0.00318	0.01027	0.00097	0.00356	0.00036
GXT_23221418	ENSCAFT00000035597	GXL_167479	MSLN	10232	NC_000016	chr16	+	816055	818730	1057	6	1.8e-05	0.000193	-1.58	down	14	3	8	21	11	26	0.00545	0.00191	0.00239	0.00891	0.01162	0.0099	0.00325	0.00157	0.01014	0.00112
GXT_23221579	XM_001917618	GXL_189797	RGMA	56963	NC_000015	chr15	-	93588233	93616587	1501	4	1.57e-06	2.09e-05	-1.32	down	14	12	23	27	17	52	0.00489	0.00539	0.0053	0.00892	0.01391	0.01692	0.00519	0.00022	0.01325	0.0033
GXT_23221632	XM_001914886	GXL_745112	AFF2	2334	NC_000023	chrX	+	147712917	148072862	3975	21	9.79e-11	2.16e-09	-1.07	down	38	23	46	72	23	93	0.00458	0.00357	0.004	0.00842	0.0071	0.01064	0.00405	0.00041	0.00872	0.00146
GXT_23221662	XM_001494859	GXL_119194	CLSTN2	64084	NC_000003	chr3	+	139889743	140285147	2924	17	0.00973	0.0453	-1.42	down	2	2	9	16	3	7	0.00028	0.00046	0.00099	0.00237	0.00126	0.00102	0.00058	0.0003	0.00155	0.00059
GXT_23221667	XM_001493724	GXL_193698	KAT2B	8850	NC_000003	chr3	+	20113275	20195864	4193	18	1.79e-69	4.93e-67	-1.67	down	85	71	151	325	125	319	0.00976	0.01038	0.01229	0.03688	0.03395	0.03575	0.01081	0.00108	0.03553	0.00121
GXT_23221928	XM_001503458	GXL_103131	SEMA6A	57556	NC_000005	chr5	-	115808765	115908777	1787	15	0.00204	0.0123	1.78	up	14	5	15	4	1	3	0.00339	0.00151	0.00235	0.00083	0.00069	0.00056	0.00242	0.00077	0.00069	0.00011
GXT_23222105	XM_001501229	GXL_380601	MICALCL	84953	NC_000011	chr11	+	12296623	12380026	2419	11	8.51e-06	9.81e-05	1.79	up	26	16	39	9	1	11	0.0052	0.00418	0.00558	0.00184	0.00051	0.00226	0.00499	0.00059	0.00154	0.00075
GXT_23222342	XM_001234354	GXL_57963	ITGA6	3655	NC_000002	chr2	+	173335702	173340411	776	5	5.53e-11	1.26e-09	-1.03	down	33	47	39	86	33	96	0.02129	0.03647	0.01691	0.04987	0.04286	0.05428	0.02489	0.00838	0.049	0.0047
GXT_23222388	ENSMODT00000036949	GXL_230287	IL16	3603	NC_000015	chr15	+	81558002	81601130	3674	17	6.63e-11	1.49e-09	-1.14	down	44	27	48	85	35	90	0.00628	0.00444	0.00443	0.01053	0.01136	0.012	0.00505	0.00087	0.0113	0.0006
GXT_23222883	XM_001109867	GXL_230294	KIAA1199	57214	NC_000015	chr15	+	81166221	81242416	4151	28	7.09e-71	2.02e-68	1.26	up	54579	47034	87637	25761	10070	27261	6.1527	6.83392	6.79446	2.75335	2.65873	2.91118	6.59369	0.31225	2.77442	0.10413
GXT_23222921	XM_001108811	GXL_189937	CILP	8483	NC_000015	chr15	-	65488048	65502203	4677	8	0.00072	0.00505	-1.12	down	11	7	14	21	8	28	0.00112	0.00101	0.00108	0.00223	0.0021	0.00298	0.00107	5e-05	0.00244	0.00039
GXT_23223071	ENSMMUT00000020578	GXL_827437	KLF8	11279	NC_000023	chrX	+	56276657	56310927	1080	6	0.0022	0.0131	-1.39	down	8	3	4	13	6	13	0.00371	0.00187	0.00113	0.00599	0.00682	0.00557	0.00224	0.00108	0.00613	0.00052
GXT_23223093	ENSMMUT00000047843	GXL_89699	CHRDL1	91851	NC_000023	chrX	-	109919322	110035432	1537	11	7.25e-28	4.65e-26	-1.6	down	24	29	55	101	42	116	0.00785	0.0114	0.01222	0.02968	0.03035	0.03629	0.01049	0.0019	0.03211	0.00297
GXT_23223164	ENSMMUT00000024562	GXL_122575	C20orf194	25943	NC_000020	chr20	-	3231807	3363155	4847	36	4.71e-43	5.74e-41	-1.03	down	212	173	309	472	197	453	0.02045	0.0207	0.02053	0.04379	0.04481	0.04162	0.02056	0.0001	0.04341	0.00133
GXT_23223288	ENSMMUT00000027133	GXL_13873	NEK10	152110	NC_000003	chr3	-	27152763	27244048	1429	15	0.000702	0.00494	1.42	up	15	10	23	4	3	6	0.00441	0.00377	0.00531	0.00104	0.00258	0.00174	0.0045	0.00063	0.00179	0.00063
GXT_23223344	ENSMMUT00000031926	GXL_193604	GALNTL2	117248	NC_000003	chr3	+	16260928	16269089	601	4	4.99e-69	1.35e-66	-2.73	down	17	10	26	109	46	114	0.01484	0.01122	0.01383	0.08334	0.09193	0.08785	0.0133	0.00153	0.08771	0.00351
GXT_23223374	ENSMMUT00000045354	GXL_13773	EFHB	151651	NC_000003	chr3	-	19920975	19977795	2264	14	0.00685	0.0341	-1.55	down	0	3	5	5	2	13	0	0.00089	0.0008	0.00109	0.00108	0.00264	0.00056	0.0004	0.0016	0.00073
GXT_23223429	ENSMMUT00000046999	GXL_119097	CD200	4345	NC_000003	chr3	+	112054789	112068671	871	5	0.00012	0.00105	-1.53	down	5	2	13	25	3	18	0.00301	0.00155	0.00539	0.01309	0.00423	0.00999	0.00332	0.00158	0.0091	0.00367
GXT_23223453	ENSMMUT00000031321	GXL_181851	TNIK	23043	NC_000003	chr3	-	170781670	171087474	4034	32	0.00869	0.0414	1.79	up	10	13	13	7	0	4	0.0013	0.00201	0.00099	0.00068	0	0.00049	0.00143	0.00043	0.00039	0.00029
GXT_23223771	ENSMMUT00000018648	GXL_45772	MYOCD	93649	NC_000017	chr17	+	12608444	12666961	2753	12	3.83e-07	5.59e-06	1.69	up	39	24	38	5	4	17	0.00724	0.00519	0.00478	0.0009	0.00178	0.00296	0.00574	0.00108	0.00188	0.00084
GXT_23224067	ENSMMUT00000021979	GXL_159013	SLC25A30	253512	NC_000013	chr13	-	45967472	45985628	3581	9	1.41e-38	1.44e-36	-1.11	down	221	181	381	550	218	558	0.03179	0.03257	0.03654	0.07309	0.07337	0.0749	0.03363	0.00208	0.07379	0.0008
GXT_23224381	ENSMMUT00000012191	GXL_134226	PPAPDC1A	196051	NC_000010	chr10	+	122263325	122349356	1107	6	4.38e-42	5.19e-40	1.91	up	165	132	225	51	12	58	0.0704	0.07769	0.0691	0.02128	0.0122	0.02459	0.0724	0.00378	0.01936	0.00524
GXT_23224442	ENSMMUT00000014651	GXL_47213	IMPA2	3613	NC_000018	chr18	+	11981057	12030842	1224	8	2.64e-55	4.77e-53	-1.25	down	374	322	548	943	436	933	0.15087	0.16742	0.14788	0.35553	0.40558	0.35238	0.15539	0.00859	0.37116	0.02437
GXT_23224496	ENSMMUT00000018265	GXL_29825	HR	55806	NC_000008	chr8	-	21972582	21986683	4036	17	3.55e-65	8.83e-63	-2.46	down	26	21	29	125	69	134	0.00306	0.00351	0.00242	0.01433	0.01916	0.01579	0.003	0.00045	0.01643	0.00202
GXT_23224551	ENSMMUT00000002853	GXL_172743	HAS2	3037	NC_000008	chr8	-	122626349	122641580	1650	3	9.93e-150	1.41e-146	1.82	up	2148	1553	3156	609	237	708	0.67504	0.62254	0.68062	0.18034	0.17219	0.20905	0.6594	0.02616	0.18719	0.01581
GXT_23224552	ENSMMUT00000003938	GXL_67302	HNF4G	3174	NC_000008	chr8	+	76456069	76476331	1227	9	0.000422	0.00316	#NAME?	down	0	0	0	4	3	3	0	0	0	0.00121	0.002	0.00122	0	0	0.00148	0.00037
GXT_23224621	XM_001092182	GXL_249867	SLC16A8	23539	NC_000022	chr22	-	38474145	38478880	1795	4	0.000153	0.0013	-1.9	down	4	2	4	15	4	12	0.00088	0.00075	0.00081	0.00414	0.00232	0.00317	0.00081	5e-05	0.00321	0.00074
GXT_23224633	ENSMMUT00000017316	GXL_47831	CSF2RB	1439	NC_000022	chr22	+	37319284	37334653	2747	12	0.000786	0.00544	-1.44	down	5	6	8	8	9	23	0.00076	0.00123	0.00092	0.00144	0.00402	0.00381	0.00097	0.0002	0.00309	0.00117
GXT_23224771	ENSMMUT00000041944	GXL_826301	ANKRD33B	651746	NC_000005	chr5	+	10618454	10650313	686	4	0.000603	0.00432	-1.09	down	10	11	8	21	10	22	0.00765	0.01032	0.00421	0.01446	0.01611	0.01452	0.00739	0.0025	0.01503	0.00076
GXT_23224808	ENSMMUT00000026462	GXL_383385	RANBP3L	202151	NC_000005	chr5	-	36251416	36271414	1263	12	0.00678	0.0338	-1.06	down	6	7	11	17	7	16	0.00249	0.00374	0.00257	0.00575	0.00486	0.00592	0.00293	0.00057	0.00551	0.00046
GXT_23224823	ENSMMUT00000026669	GXL_6010	POLR3G	10622	NC_000005	chr5	+	89781385	89807987	703	7	0.00476	0.0252	2.5	up	11	5	6	4	0	0	0.00746	0.0048	0.00308	0.00282	0	0	0.00511	0.0018	0.00094	0.00133
GXT_23224961	ENSMMUT00000038531	GXL_184421	PPP1R14A	94274	NC_000019	chr19	-	38741958	38743615	244	3	3.45e-108	2.36e-105	-1.29	down	549	394	684	1329	559	1263	0.94506	0.8885	0.82273	2.22876	2.29938	2.11233	0.88543	0.04999	2.21349	0.07712
GXT_23225111	ENSMMUT00000044912	GXL_482311	LOC348751	348751	NC_000002	chr2	-	200683042	200713685	1091	5	0.00118	0.00772	-1.16	down	17	8	14	25	17	21	0.00817	0.00433	0.00431	0.01016	0.01801	0.00793	0.0056	0.00181	0.01203	0.00432
GXT_23225224	NM_001040029	GXL_42223	EPCAM	4072	NC_000002	chr2	+	47600600	47613752	871	8	4.63e-05	0.000451	#NAME?	down	0	0	0	3	2	8	0	0	0	0.00175	0.00282	0.00457	0	0	0.00305	0.00116
GXT_23225281	NM_001032834	GXL_161335	IL18	3606	NC_000011	chr11	-	112014282	112025776	619	5	7.59e-05	0.000699	-1.44	down	4	7	9	21	6	20	0.00254	0.00654	0.00525	0.01602	0.0119	0.01448	0.00478	0.00167	0.01413	0.0017
GXT_23225285	ENSMMUT00000003830	GXL_41477	VWCE	220001	NC_000011	chr11	-	61026147	61048645	2023	13	5.26e-09	9.62e-08	1.49	up	45	42	60	18	7	18	0.01089	0.013	0.00982	0.00417	0.00425	0.00419	0.01124	0.00132	0.0042	3e-05
GXT_23225355	XM_001086244	GXL_174014	ZBTB16	7704	NC_000011	chr11	+	113931229	114121525	2438	7	3.97e-77	1.36e-74	-2.22	down	61	50	99	305	132	333	0.01226	0.01339	0.01363	0.06036	0.06396	0.06482	0.01309	0.0006	0.06305	0.00193
GXT_23225501	ENSMMUT00000002531	GXL_97864	MAGI2	9863	NC_000007	chr7	-	77708265	78256555	3296	19	9.16e-09	1.63e-07	-1.01	down	37	39	58	85	41	87	0.00557	0.00777	0.00619	0.01234	0.01302	0.01254	0.00651	0.00093	0.01263	0.00029
GXT_23225532	XM_001096722	GXL_97834	SEMA3A	10371	NC_000007	chr7	-	83588484	83764268	4403	16	0.00492	0.0259	1.17	up	18	11	22	7	3	8	0.00203	0.00147	0.00172	0.00079	0.00084	0.0009	0.00174	0.00023	0.00084	4e-05
GXT_23225607	ENSMMUT00000012584	GXL_33674	PHTF2	57157	NC_000007	chr7	+	77522925	77583229	2214	16	5.23e-39	5.42e-37	1.16	up	481	364	688	216	100	217	0.10231	0.09739	0.10136	0.04212	0.04921	0.04362	0.10035	0.00213	0.04498	0.00305
GXT_23225652	ENSMMUT00000026313	GXL_141551	ANO4	121601	NC_000012	chr12	+	101295439	101522409	3764	27	0.00559	0.0288	-2.81	down	1	0	1	5	1	5	0.00014	0	0.0001	0.00053	0.00033	0.00053	8e-05	6e-05	0.00046	9e-05
GXT_23225657	ENSMMUT00000017742	GXL_103746	BCL7A	605	NC_000012	chr12	+	122468605	122498787	2316	5	3e-16	1.02e-14	-1.33	down	41	26	36	90	35	90	0.0089	0.00757	0.00538	0.01871	0.01823	0.01879	0.00728	0.00145	0.01858	0.00025
GXT_23225761	ENSMMUT00000028733	GXL_59485	PTPRO	5800	NC_000012	chr12	+	15704481	15747975	1218	12	6.55e-07	9.23e-06	-2.46	down	3	2	4	19	6	15	0.00086	0.00089	0.00119	0.00611	0.00504	0.00514	0.00098	0.00015	0.00543	0.00048
GXT_23225910	XM_001084286	GXL_76068	GPRC5B	51704	NC_000016	chr16	-	19869652	19893623	3553	4	3.3e-08	5.49e-07	1.93	up	28	17	44	3	3	12	0.00399	0.00304	0.00447	0.00042	0.00104	0.00168	0.00383	0.00059	0.00105	0.00051
GXT_23225911	ENSMMUT00000003853	GXL_76068	GPRC5B	51704	NC_000016	chr16	-	19870301	19884171	2737	3	4.55e-09	8.38e-08	2.25	up	28	15	41	2	2	10	0.00518	0.00345	0.00541	0.00036	0.0009	0.00182	0.00468	0.00087	0.00103	0.0006
GXT_23225930	ENSMMUT00000027652	GXL_133460	NQO1	1728	NC_000016	chr16	-	69744879	69752441	708	4	4.8e-92	2.37e-89	-1.01	down	1470	1021	2105	3027	1234	2979	1.01234	0.91726	1.00102	1.97816	1.96985	1.9562	0.97687	0.04241	1.96807	0.00905
GXT_23225941	ENSMMUT00000031013	GXL_133610	LDHD	197257	NC_000016	chr16	-	75145767	75149561	1942	10	9.66e-09	1.72e-07	-1.55	down	11	11	20	38	16	44	0.0027	0.00347	0.00372	0.00868	0.00948	0.0104	0.0033	0.00043	0.00952	0.0007
GXT_23226194	AK030069	GXL_184892	OLFML2A	169611	NC_000009	chr9	+	127533098	127573931	3141	8	2.1e-73	6.39e-71	-1.42	down	260	243	380	788	361	706	0.04257	0.04999	0.04241	0.12126	0.13545	0.10939	0.04499	0.00354	0.12203	0.01065
GXT_23226440	XM_001508169	GXL_89699	CHRDL1	91851	NC_000023	chrX	-	109919459	110031246	1328	11	5.3e-18	2.01e-16	-1.64	down	18	27	42	82	37	99	0.00692	0.01247	0.01075	0.02768	0.03051	0.03585	0.01005	0.00232	0.03135	0.00339
GXT_23226553	XM_513140	GXL_46989	CYP4B1	1580	NC_000001	chr1	+	47278168	47285021	1707	9	1.22e-06	1.65e-05	#NAME?	down	0	0	0	10	2	6	0	0	0	0.00261	0.00144	0.00175	0	0	0.00193	0.00049
GXT_23226722	XM_001140541	GXL_155851	DPF3	8110	NC_000014	chr14	-	73086005	73265535	1902	14	0.00987	0.0459	1.72	up	12	8	13	8	0	2	0.00276	0.00248	0.00209	0.00159	0	0.00052	0.00244	0.00027	0.0007	0.00066
GXT_23226768	ENSPTRT00000040246	GXL_484123	REPS2	9185	NC_000023	chrX	+	17024344	17167136	1558	16	0.00948	0.0444	-1.1	down	6	6	3	13	5	11	0.00135	0.00216	0.0007	0.0035	0.00315	0.00243	0.0014	0.0006	0.00303	0.00045
GXT_23226858	XM_514823	GXL_382658	RGS19	10287	NC_000020	chr20	-	62704534	62705941	1219	3	2.75e-18	1.06e-16	-1.02	down	114	73	134	219	94	195	0.04798	0.03897	0.03895	0.08809	0.09298	0.07677	0.04197	0.00425	0.08595	0.00679
GXT_23226879	ENSPTRT00000027502	GXL_13873	NEK10	152110	NC_000003	chr3	-	27152763	27257248	1455	16	0.000702	0.00494	1.42	up	15	10	23	4	3	6	0.00433	0.00371	0.00521	0.00102	0.00253	0.00171	0.00442	0.00062	0.00175	0.00062
GXT_23227032	XM_518820	GXL_190749	CNKSR3	154043	NC_000006	chr6	-	154726294	154817268	2890	13	7.33e-42	8.59e-40	-1	down	211	168	361	458	207	475	0.03718	0.0376	0.04281	0.07436	0.08306	0.07761	0.0392	0.00256	0.07834	0.00359
GXT_23227143	ENSPTRT00000017563	GXL_824591	FAM20A	54757	NC_000017	chr17	-	66533265	66551886	1570	10	1.49e-28	9.87e-27	-1.29	down	126	78	194	272	153	289	0.03861	0.03179	0.04115	0.07572	0.11097	0.08377	0.03718	0.00395	0.09015	0.01508
GXT_23227301	XM_001138551	GXL_227947	CCDC3	83643	NC_000010	chr10	-	12938614	13045920	2885	4	3.87e-09	7.17e-08	-1.29	down	25	15	25	51	21	57	0.00455	0.00351	0.00313	0.00876	0.00881	0.00966	0.00373	0.0006	0.00908	0.00041
GXT_23227395	ENSPTRT00000029617	GXL_164651	DOK7	285489	NC_000004	chr4	+	3475135	3502552	1386	6	0.0014	0.00894	-1.41	down	1	7	2	9	4	14	0.00038	0.00341	0.00036	0.00322	0.00354	0.00503	0.00138	0.00143	0.00393	0.00079
GXT_23227422	XM_001142934	GXL_67196	CHRAC1	54108	NC_000008	chr8	+	141517378	141527246	2976	7	2.09e-52	3.53e-50	-1.34	down	164	119	200	388	169	419	0.02883	0.0265	0.02429	0.06348	0.06974	0.06944	0.02654	0.00185	0.06755	0.00288
GXT_23227539	XM_517686	GXL_6171	BHMT	635	NC_000005	chr5	+	78402702	78428119	2842	10	0.000136	0.00117	-1.96	down	2	5	3	10	9	12	0.00037	0.00105	0.00038	0.0014	0.00347	0.0021	0.0006	0.00032	0.00232	0.00086
GXT_23227577	ENSPTRT00000032378	GXL_27397	DOCK2	1794	NC_000005	chr5	+	169129134	169302880	1758	12	0.00853	0.0408	1.01	up	13	14	33	12	3	9	0.0034	0.00441	0.00555	0.0031	0.0021	0.00198	0.00445	0.00088	0.00239	0.0005
GXT_23227612	ENSPTRT00000065297	GXL_189047	MEIS3	56917	NC_000019	chr19	-	47906392	47920149	1257	11	3.93e-10	8.16e-09	-1.05	down	73	32	86	100	64	123	0.02484	0.0143	0.02055	0.03143	0.0513	0.03911	0.0199	0.00433	0.04061	0.00818
GXT_23227826	XM_001159382	GXL_693735	REL	5966	NC_000002	chr2	+	61118695	61150189	2395	9	0.00129	0.00831	1.36	up	17	14	24	8	3	6	0.00329	0.00338	0.00347	0.00132	0.00154	0.00125	0.00338	7e-05	0.00137	0.00012
GXT_23227887	XR_023138	GXL_161376	SESN3	143686	NC_000011	chr11	-	94898702	94926688	9120	9	0	0	-2.14	down	159	104	261	799	274	742	0.00906	0.00762	0.01022	0.04284	0.03648	0.03992	0.00897	0.00106	0.03975	0.0026
GXT_23227979	XM_519017	GXL_779662	CREB5	9586	NC_000007	chr7	+	28448298	28859732	2549	12	1.04e-19	4.32e-18	2.32	up	55	34	89	14	2	15	0.01056	0.00883	0.01176	0.00264	0.00096	0.00274	0.01038	0.0012	0.00211	0.00082
GXT_23228076	XR_023379	GXL_59485	PTPRO	5800	NC_000012	chr12	+	15469685	15750331	6417	28	4.46e-13	1.21e-11	-1.71	down	15	14	17	57	22	45	0.00114	0.00126	0.00096	0.00402	0.00402	0.00326	0.00112	0.00012	0.00377	0.00036
GXT_23228343	NM_058211	GXL_13920	SLC4A7	9497	NC_000003	chr3	-	27418197	27493990	3774	25	8.96e-26	5.19e-24	1.07	up	301	208	426	148	56	150	0.03554	0.03216	0.03508	0.0174	0.01624	0.01743	0.03426	0.0015	0.01702	0.00055
GXT_23228406	ENSRNOT00000045700	GXL_381737	MYO15A	51168	NC_000017	chr17	+	18027797	18082184	6939	62	0.00727	0.0358	-1.07	down	5	9	6	16	8	11	0.00038	0.00068	0.00026	0.00093	0.00106	0.00065	0.00044	0.00018	0.00088	0.00017
GXT_23228534	NM_031740	GXL_71074	B4GALT6	9331	NC_000018	chr18	-	29203088	29246336	3524	8	7.8e-08	1.25e-06	-1.2	down	21	18	46	67	25	57	0.00283	0.00344	0.00461	0.00923	0.00824	0.00791	0.00363	0.00074	0.00846	0.00056
GXT_23228556	NM_001108939	GXL_67302	HNF4G	3174	NC_000008	chr8	+	76459819	76477173	1926	8	0.0101	0.0467	-3.31	down	0	0	2	4	3	3	0	0	0.00038	0.00077	0.00127	0.00078	0.00013	0.00018	0.00094	0.00023
GXT_23228590	XM_001065971	GXL_45379	FAM196B	100131897	NC_000005	chr5	-	169291277	169310902	1589	3	2.58e-25	1.46e-23	1.56	up	123	78	133	33	15	44	0.03975	0.03268	0.02979	0.0103	0.01159	0.01379	0.03407	0.00418	0.01189	0.00144
GXT_23228605	ENSRNOT00000014179	GXL_159325	FAM134B	54463	NC_000005	chr5	-	16473263	16483583	2637	6	0.00682	0.034	-1.01	down	5	5	7	15	2	15	0.001	0.00128	0.00096	0.00274	0.00093	0.00264	0.00108	0.00014	0.0021	0.00083
GXT_23228629	NM_031571	GXL_57948	ACVR2A	92	NC_000002	chr2	+	148653867	148685559	2206	10	2.39e-19	9.77e-18	-1.03	down	80	56	117	152	73	175	0.01688	0.01603	0.01853	0.03057	0.0395	0.03616	0.01715	0.00104	0.03541	0.00368
GXT_23228754	NM_172067	GXL_123201	SPON1	10418	NC_000011	chr11	+	14063065	14288606	3449	14	2.75e-51	4.51e-49	-1.77	down	40	28	76	157	64	152	0.00598	0.00547	0.00759	0.02158	0.02207	0.02085	0.00635	0.0009	0.0215	0.0005
GXT_23228851	NM_214096	GXL_4966	DUOX1	53905	NC_000015	chr15	+	45426338	45457344	4733	31	0.00767	0.0374	-1.05	down	8	6	19	23	9	18	0.00089	0.00071	0.00145	0.00218	0.00208	0.00158	0.00102	0.00032	0.00195	0.00026
GXT_23383261	ENST00000409977	GXL_479716	C11orf90	387804	NC_000011	chr11	-	93551398	93583697	2969	4	0.000866	0.00592	-1.42	down	11	2	12	23	10	14	0.00194	0.00045	0.00146	0.00384	0.00414	0.00218	0.00128	0.00062	0.00339	0.00086
GXT_23383323	ENST00000408965	GXL_29843	CEBPD	1052	NC_000008	chr8	-	48649471	48650770	1300	1	2.32e-57	4.54e-55	-1.12	down	887	699	1369	1998	910	2059	0.35789	0.36253	0.38009	0.76182	0.85914	0.78868	0.36684	0.00956	0.80321	0.04104
GXT_23383407	ENST00000409806	GXL_383762	ZC3H12D	340152	NC_000006	chr6	-	149771792	149806197	1930	6	0.000166	0.0014	-1.64	down	4	7	2	12	9	14	0.00109	0.00187	0.00037	0.00308	0.00445	0.00335	0.00111	0.00061	0.00363	0.00059
GXT_23383667	ENST00000409855	GXL_482264	SCN7A	6332	NC_000002	chr2	-	167260083	167343478	7183	25	0.000317	0.00247	-2.43	down	2	0	4	11	2	11	0.00015	0	0.0002	0.00069	0.00034	0.00069	0.00012	8e-05	0.00057	0.00016
GXT_23383678	ENST00000409542	GXL_241273	CHRNA1	1134	NC_000002	chr2	-	175612538	175629140	1460	8	0.00235	0.0139	Inf	up	4	5	2	0	0	0	0.00144	0.00231	0.00049	0	0	0	0.00141	0.00074	0	0
GXT_23383679	ENST00000409219	GXL_241273	CHRNA1	1134	NC_000002	chr2	-	175612538	175629140	1466	8	0.00691	0.0344	Inf	up	4	4	1	0	0	0	0.00143	0.00184	0.00025	0	0	0	0.00117	0.00067	0	0
GXT_23383766	ENST00000396653	GXL_89035	AP1S3	130340	NC_000002	chr2	-	224629795	224702299	589	3	0.00301	0.0171	1.45	up	17	12	28	12	0	8	0.01431	0.01376	0.01444	0.0097	0	0.0059	0.01417	0.00029	0.0052	0.00399
GXT_23383787	ENST00000409079	GXL_89147	NGEF	25791	NC_000002	chr2	-	233759312	233792864	1022	4	0.000864	0.00591	-1.68	down	5	3	8	10	9	17	0.00257	0.00198	0.00212	0.00485	0.00961	0.00704	0.00222	0.00025	0.00717	0.00195
GXT_23383803	ENST00000409574	GXL_88986	HES6	55502	NC_000002	chr2	-	239147501	239148682	738	4	0.00125	0.00809	-1.09	down	15	12	32	29	23	33	0.00898	0.01096	0.01469	0.01947	0.03184	0.02203	0.01154	0.00237	0.02445	0.00533
GXT_23383861	ENST00000409410	GXL_262149	CATSPERG	57828	NC_000019	chr19	+	38826585	38861582	4333	29	0.00954	0.0446	-1.37	down	3	4	8	12	6	11	0.00036	0.00062	0.00063	0.00137	0.0017	0.00103	0.00054	0.00012	0.00137	0.00027
GXT_23383941	ENST00000409393	GXL_1224938	CRIP1/C14orf80	-2	NC_000014	chr14	+	105953204	105955075	468	6	4.19e-89	1.93e-86	-1.04	down	726	485	906	1420	614	1379	0.62813	0.56281	0.54838	1.19607	1.27311	1.13536	0.57977	0.0347	1.20151	0.05637
GXT_23384063	ENST00000409688	GXL_35036	C7orf41	222166	NC_000007	chr7	+	30174604	30197585	843	2	5.32e-20	2.25e-18	-1.17	down	82	51	121	171	78	190	0.04918	0.03927	0.04971	0.09549	0.10751	0.10662	0.04605	0.0048	0.10321	0.00547
GXT_23384077	ENST00000409301	GXL_34995	AVL9	23080	NC_000007	chr7	+	32535138	32625778	4336	15	1.56e-33	1.28e-31	1.13	up	573	399	835	272	98	296	0.06585	0.05906	0.06634	0.02941	0.02634	0.03241	0.06375	0.00332	0.02939	0.00248
GXT_23384466	ENST00000409968	GXL_482238	THSD7B	80731	NC_000002	chr2	+	137523115	138435287	6112	28	0.00102	0.00679	-1.96	down	1	2	6	12	4	10	9e-05	0.00022	0.00035	0.00089	0.0006	0.00073	0.00022	0.00011	0.00074	0.00012
GXT_23384512	ENST00000409080	GXL_57963	ITGA6	3655	NC_000002	chr2	+	173292517	173371002	5298	25	1.67e-106	1.13e-103	-1.15	down	488	438	831	1211	523	1336	0.04508	0.05192	0.05225	0.10569	0.1114	0.11753	0.04975	0.0033	0.11154	0.00483
GXT_23384547	ENST00000409545	GXL_57956	C2orf88	84281	NC_000002	chr2	+	191014972	191064789	570	2	0.000573	0.00413	1.12	up	35	29	46	20	4	21	0.03158	0.03363	0.02916	0.01659	0.00862	0.01835	0.03146	0.00183	0.01452	0.00423
GXT_23384642	ENST00000409708	GXL_925811	EFHD1	80303	NC_000002	chr2	+	233502851	233547484	1817	4	2.02e-39	2.14e-37	-1.87	down	53	41	97	211	103	207	0.01501	0.01447	0.01882	0.05621	0.06757	0.0552	0.0161	0.00194	0.05966	0.00561
GXT_23384668	ENST00000409169	GXL_119535	ESPNL	339768	NC_000002	chr2	+	239009061	239041928	4441	8	2.13e-11	5.01e-10	-1.27	down	26	24	39	75	26	76	0.00307	0.00349	0.00317	0.00837	0.00719	0.00852	0.00324	0.00018	0.00803	0.00059
GXT_23384669	ENST00000409506	GXL_119535	ESPNL	339768	NC_000002	chr2	+	239036031	239041928	3610	4	2.07e-11	4.88e-10	-1.27	down	27	24	39	75	27	76	0.00393	0.0043	0.0039	0.0103	0.00918	0.01049	0.00404	0.00018	0.00999	0.00058
GXT_23384736	NM_012465	GXL_197142	TLL2	7093	NC_000010	chr10	-	98124363	98273683	6771	21	0.00307	0.0174	1.32	up	12	16	33	12	1	9	0.00077	0.00149	0.00171	0.00073	0.00018	0.00059	0.00132	0.0004	0.0005	0.00023
GXT_23384737	NM_001135241	GXL_227949	AKR1C2	1646	NC_000010	chr10	-	5042103	5046053	945	4	4.1e-09	7.59e-08	-1.38	down	19	14	46	53	28	68	0.01022	0.00999	0.01759	0.02623	0.03419	0.03444	0.0126	0.00353	0.03162	0.00381
GXT_23384767	NM_001135935	GXL_159254	POSTN	10631	NC_000013	chr13	-	38136719	38172981	3215	21	1.27e-97	7.14e-95	1.25	up	13604	9335	19984	5718	2277	6249	1.97658	1.74238	1.99755	0.78759	0.78165	0.86409	1.9055	0.11566	0.81111	0.03754
GXT_23384960	NM_001143963	GXL_1239890	ARHGAP4	393	NC_000023	chrX	-	153126971	153141399	5002	26	0.00476	0.0252	-3.36	down	0	1	0	4	3	3	0	6e-05	0	0.0004	0.00049	0.0002	2e-05	3e-05	0.00036	0.00012
GXT_23385032	NM_001135936	GXL_159254	POSTN	10631	NC_000013	chr13	-	38136719	38172981	3125	20	5.57e-101	3.31e-98	1.25	up	13361	9154	19558	5615	2227	6127	1.99845	1.75904	2.01279	0.79589	0.78703	0.87205	1.92343	0.11639	0.81832	0.03816
GXT_23385033	NM_001135934	GXL_159254	POSTN	10631	NC_000013	chr13	-	38136719	38172981	3209	21	2.9e-100	1.7e-97	1.25	up	13415	9189	19631	5649	2238	6176	1.95289	1.71872	1.96695	0.77914	0.76964	0.85554	1.87952	0.11385	0.80144	0.03845
GXT_23385042	NR_027263	GXL_691966	C14orf128	84837	NC_000014	chr14	-	32544625	32545905	1281	1	3.36e-05	0.000339	-1.1	down	18	17	28	43	22	38	0.00737	0.00895	0.00789	0.01666	0.02109	0.01477	0.00807	0.00066	0.01751	0.00265
GXT_23385063	NR_024349	GXL_252086	LOC284023	284023	NC_000017	chr17	-	7816640	7819265	2525	2	3.4e-15	1.08e-13	-1.28	down	52	30	51	98	54	95	0.01061	0.0079	0.00714	0.01924	0.02626	0.01853	0.00855	0.00149	0.02134	0.00349
GXT_23385110	NR_024126	GXL_693136	ATP1A1OS	84852	NC_000001	chr1	-	116948040	116961181	887	3	7.85e-05	0.000721	-1.88	down	7	3	6	13	12	16	0.00414	0.00228	0.00244	0.00727	0.01296	0.00868	0.00295	0.00084	0.00964	0.00242
GXT_23385118	NM_001136021	GXL_925584	NFATC2	4773	NC_000020	chr20	-	50007765	50179168	2974	11	7.69e-08	1.23e-06	2.43	up	22	15	32	6	1	4	0.0037	0.00317	0.00352	0.001	0.00041	0.00067	0.00346	0.00022	0.00069	0.00024
GXT_23385129	NR_027129	GXL_163447	C21orf67	84536	NC_000021	chr21	-	46354640	46359828	1101	4	7.09e-11	1.59e-09	-1.29	down	33	16	48	70	34	71	0.01572	0.00984	0.01542	0.03154	0.0368	0.03121	0.01366	0.0027	0.03318	0.00256
GXT_23385207	NR_026807	GXL_40090	C6orf155	79940	NC_000006	chr6	-	72124149	72130448	2933	4	4.89e-06	5.93e-05	-1.06	down	29	17	35	45	24	62	0.00492	0.00391	0.00418	0.00744	0.00963	0.01053	0.00434	0.00043	0.0092	0.0013
GXT_23385272	NM_001135053	GXL_479522	SIGIRR	59307	NC_000011	chr11	-	405716	417397	1670	10	2.75e-19	1.12e-17	-1.06	down	94	54	119	173	84	163	0.02859	0.0218	0.02488	0.04899	0.05881	0.0479	0.02509	0.00278	0.0519	0.00491
GXT_23385273	NM_001135054	GXL_479522	SIGIRR	59307	NC_000011	chr11	-	405716	414999	1743	10	1.97e-19	8.06e-18	-1.06	down	94	54	119	174	84	164	0.02739	0.02089	0.02384	0.04722	0.05635	0.04618	0.02404	0.00266	0.04992	0.00457
GXT_23385335	NR_026951	GXL_252130	C17orf44	284029	NC_000017	chr17	-	8123948	8127361	2094	3	0.000237	0.00191	-1.91	down	4	2	4	14	5	11	0.001	0.00064	0.00069	0.00331	0.00296	0.00262	0.00078	0.00016	0.00296	0.00028
GXT_23385394	NR_026871	GXL_692973	LOC441869	441869	NC_000001	chr1	-	1353800	1356650	1477	3	0.0076	0.0371	-1.32	down	13	1	4	16	8	9	0.00438	0.00046	0.00087	0.00517	0.00665	0.00281	0.0019	0.00176	0.00488	0.00158
GXT_23385395	NR_026878	GXL_779400	MGC12982	84793	NC_000001	chr1	-	47897805	47900313	2509	1	6.54e-05	0.000613	-1.11	down	11	14	16	33	12	30	0.0023	0.00376	0.0023	0.00651	0.00587	0.00596	0.00279	0.00069	0.00611	0.00028
GXT_23385401	NR_024180	GXL_34958	SLC2A5	6518	NC_000001	chr1	-	9097005	9148510	2315	14	0.00638	0.0322	-1.65	down	3	2	6	12	5	8	0.00045	0.00058	0.00078	0.00236	0.00265	0.00171	0.0006	0.00014	0.00224	0.00039
GXT_23385440	NM_199347	GXL_13873	NEK10	152110	NC_000003	chr3	-	27257097	27410912	2639	25	0.0092	0.0434	1.3	up	6	4	26	5	1	5	0.00119	0.00102	0.00288	0.00094	0.00047	0.00075	0.0017	0.00084	0.00072	0.00019
GXT_23385446	NM_130830	GXL_193494	LRRC15	131578	NC_000003	chr3	-	194075976	194090472	5883	2	9.3e-19	3.67e-17	1.03	up	151	152	235	85	37	89	0.01346	0.01742	0.0144	0.00716	0.00772	0.00748	0.01509	0.00169	0.00745	0.00023
GXT_23385447	NM_001135057	GXL_193494	LRRC15	131578	NC_000003	chr3	-	194075976	194090472	5940	3	1.09e-18	4.28e-17	1.03	up	151	152	236	85	37	90	0.01334	0.01725	0.01429	0.00709	0.00765	0.00746	0.01496	0.00167	0.0074	0.00023
GXT_23385453	NM_001145670	GXL_164638	SORBS2	8470	NC_000004	chr4	-	186506598	186733410	4929	21	7.94e-125	7.6e-122	-1.2	down	1023	836	1480	2661	976	2578	0.10125	0.10745	0.10301	0.25246	0.23069	0.2464	0.1039	0.00261	0.24318	0.00917
GXT_23385455	NM_001145671	GXL_164638	SORBS2	8470	NC_000004	chr4	-	186506598	186732225	4685	23	2.79e-121	2.44e-118	-1.2	down	1042	852	1510	2710	1001	2622	0.10817	0.11493	0.11031	0.26969	0.24822	0.26287	0.11114	0.00282	0.26026	0.00896
GXT_23385456	NM_001145672	GXL_164638	SORBS2	8470	NC_000004	chr4	-	186506598	186732048	4356	21	5.77e-126	5.78e-123	-1.22	down	1004	820	1447	2644	967	2557	0.11218	0.11901	0.11354	0.28284	0.25851	0.27536	0.11491	0.00295	0.27224	0.01018
[truncated: 4,415 more rows]

## Sheet: Ctrl-Si.diff_expressed_genes_up
GeneId	Symbol	#transcripts regulated	total #transcripts for gene	mean log2(fold change) of reg. trans.	min fold change of reg. trans.	max fold change of reg. trans.	fc stddev	min p_value	mean NE(treat.reg.)	stddev NE(treat.reg.)	mean NE(ctrl.reg.)	stddev NE(ctrl.reg.)
[truncated: 856 more rows]

[truncated: 3 more sheets: Ctrl-Si-diff expressed-Down, PLZF-Si-diff-expressed-genes-Up, PLZF-Si-diff-expressed-gen-Down]
